# Supplementary material for: Leveraging a time-series event separation method to disentangle time-varying hydrologic controls on streamflow – application to wildfire-affected catchments
Source: Copernicus journal article supplement (doi:10.5194/hess-29-27-2025), 2025-01-03
Supplement: Supplementary file 1 [file hess-29-27-2025-supplement.zip]

## Sheet: Events_Sorting - Copy
	storm_start	storm_peak	storm_end	storm_peak_60int_mm/hr	storm_depth_mm	antPrecip_mm	flow_start	flow_peak	flow_end	flow_start_mag_cfs	flow_peak_mag_cfs	flow_end_mag_cfs	volume_ft3
1	1988-11-14 21:00:00	1988-11-15 04:23:07	1988-11-15 06:00:00	0.4	2.5	1.3	1988-11-15 03:00:00	1988-11-15 12:09:00	1988-11-16 08:00:00	5.7625	7.8	6.7	101212
2	1988-11-24 09:00:00	1988-11-24 09:30:00	1988-11-24 11:00:00	0.1	0.3	0	1988-11-24 09:15:00	1988-11-24 09:24:00	1988-11-24 12:00:00	7.8	7.8	7.3	1743.75
3	1988-11-25 03:00:00	1988-11-25 03:30:00	1988-11-25 05:00:00	0.1	0.3	0.3	1988-11-25 03:15:00	1988-11-25 03:24:00	1988-11-25 07:00:00	5.8	5.675	5.3	0
4	1988-11-27 05:30:00	1988-11-27 06:00:00	1988-11-27 08:00:00	0.15	0.4	0.6	1988-11-27 19:00:00	1988-11-27 20:09:00	1988-11-30 08:00:00	5.95	6.2	5.8	792970
5	1989-01-28 02:08:34	1989-01-28 04:29:59	1989-01-28 19:00:00	3.19984	10.3	2.9	1989-01-28 09:00:00	1989-01-28 10:09:00	1989-01-29 04:00:00	2.4875	3.3	2.5	43177
6	1989-02-13 13:00:00	1989-02-13 13:30:00	1989-02-13 18:00:00	0.1	0.6	5.6	1989-02-13 13:15:00	1989-02-14 15:09:00	1989-02-14 22:00:00	2.9	3	2.9	2508.75
7	1989-04-30 05:00:00	1989-04-30 11:30:01	1989-04-30 17:00:00	0.4	2.9	5.6	1989-04-30 17:00:00	1989-04-30 20:00:00	1989-05-01 02:00:00	2.8875	4	2.5	19413.4
8	1989-05-02 03:00:00	1989-05-02 04:29:55	1989-05-02 05:00:00	0.399732	0.7	7.8	1989-05-02 03:00:00	1989-05-02 18:00:00	1989-05-03 09:00:00	54.25	79	64	1.03946e+06
9	1989-05-08 16:00:00	1989-05-08 21:50:14	1989-05-08 23:00:00	0.2	1.3	0	1989-05-08 16:00:00	1989-05-09 13:00:00	1989-05-09 17:00:00	211	239	115	1457325
10	1989-05-09 14:00:00	1989-05-09 14:30:00	1989-05-09 16:00:00	0.1	0.3	1.3	1989-05-09 14:15:00	1989-05-09 14:15:00	1989-05-09 17:00:00	239	217.75	115	0
11	1989-05-09 23:00:00	1989-05-09 23:30:00	1989-05-10 01:00:00	0.3	0.6	1.6	1989-05-09 23:00:00	1989-05-10 09:00:00	1989-05-11 07:00:00	82	125	1.925	1.24175e+06
12	1989-05-10 12:00:00	1989-05-10 15:28:39	1989-05-10 17:00:00	0.2	0.8	2.2	1989-05-10 12:15:00	1989-05-10 12:15:00	1989-05-11 07:00:00	83	83	1.925	7287.75
13	1989-05-11 20:00:00	1989-05-11 20:30:00	1989-05-11 22:00:00	0.1	0.3	3	1989-05-11 21:00:00	1989-05-12 16:00:00	1989-05-17 05:00:00	8.6875	154	115	4.40377e+07
14	1989-05-13 08:00:00	1989-05-13 14:30:01	1989-05-14 20:00:00	1.89984	19.9	5.4	1989-05-13 09:00:00	1989-05-13 22:00:00	1989-05-15 02:00:00	139.75	254	195	7.9884e+06
15	1989-05-29 15:20:00	1989-05-29 19:30:02	1989-05-30 02:00:00	2.69986	12.1	0	1989-05-29 16:00:00	1989-05-30 06:00:00	1989-05-30 09:00:00	420	720	512.875	1.22604e+06
16	1989-05-30 15:00:00	1989-05-30 17:30:02	1989-05-31 03:00:00	1.69953	6.8	12.1	1989-05-30 17:00:00	1989-05-31 06:00:00	1989-05-31 12:00:00	481.625	649	399	6.91097e+06
17	1989-05-31 14:00:00	1989-05-31 16:29:56	1989-05-31 18:00:00	0.699698	1.6	18.9	1989-05-31 14:00:00	1989-06-01 10:00:00	1989-06-01 14:00:00	403.5	473	407	1.12183e+06
18	1989-06-02 06:00:00	1989-06-02 14:26:57	1989-06-03 05:00:00	0.6	4.8	20.5	1989-06-02 06:15:00	1989-06-02 06:15:00	1989-06-03 06:00:00	386	386	326.25	469296
19	1989-06-10 14:00:00	1989-06-10 14:30:00	1989-06-10 16:00:00	0.1	0.3	6.8	1989-06-11 08:00:00	1989-06-11 14:00:00	1989-06-12 03:00:00	24.25	135	12.625	4.41402e+06
20	1989-06-11 16:00:00	1989-06-11 16:30:00	1989-06-12	0.6	1.9	6.4	1989-06-11 16:15:00	1989-06-11 16:15:00	1989-06-12 03:00:00	130.333	128	12.625	47757.1
21	1989-06-12 10:00:00	1989-06-12 14:29:58	1989-06-12 18:00:00	1.09997	4.6	8.1	1989-06-12 10:00:00	1989-06-12 18:00:00	1989-06-12 21:00:00	57.75	112	90.875	824285
22	1989-06-22 09:00:00	1989-06-22 09:30:00	1989-06-22 17:00:00	0.1	0.9	0.6	1989-06-22 13:00:00	1989-06-22 15:00:00	1989-06-23 21:00:00	119.375	230	200	6.9205e+06
23	1989-06-24 15:00:00	1989-06-24 15:30:00	1989-06-24 17:00:00	0.1	0.3	3.6	1989-06-24 15:15:00	1989-06-24 15:15:00	1989-06-24 18:00:00	127	127	110	53550
24	1989-06-25 16:00:00	1989-06-25 17:30:07	1989-06-25 20:00:00	0.2	0.7	3.9	1989-06-25 16:00:00	1989-06-25 21:00:00	1989-06-25 22:00:00	81	119	65	331200
25	1989-07-22 05:20:00	1989-07-22 05:50:00	1989-07-22 07:00:00	0.3	0.6	0	1989-07-22 05:35:00	1989-07-22 05:45:00	1989-07-22 11:00:00	91.5	91.25	91	0
26	1989-07-22 14:00:00	1989-07-22 14:30:00	1989-07-22 16:00:00	0.1	0.3	0.6	1989-07-23 03:00:00	1989-07-23 15:00:00	1989-07-23 16:00:00	83.75	119	65	1.06639e+06
27	1989-07-24 02:00:00	1989-07-24 10:29:57	1989-07-24 17:00:00	1.09968	4.7	0.9	1989-07-24 07:00:00	1989-07-25 16:00:00	1989-07-27 19:00:00	63.625	123	67	8.93988e+06
28	1989-07-27 13:30:00	1989-07-27 17:30:01	1989-07-27 19:00:00	1.59952	3.3	5.6	1989-07-27 23:00:00	1989-07-28 15:00:00	1989-07-30 17:00:00	67.75	103	75.75	9.3592e+06
29	1989-07-28 10:20:00	1989-07-28 12:30:05	1989-07-29	1.39966	6.7	8.3	1989-07-28 14:00:00	1989-07-29 20:00:00	1989-07-30 17:00:00	62.375	195	75.75	9.92847e+06
30	1989-07-29 09:08:34	1989-07-29 12:30:00	1989-07-30 03:00:00	9.99858	16.8	14.7	1989-07-29 11:00:00	1989-07-30 09:00:00	1989-07-30 17:00:00	96.625	208	75.75	6.25321e+06
31	1989-08-07 11:00:00	1989-08-07 17:30:01	1989-08-07 19:00:00	0.699907	2.8	10.5	1989-08-07 13:00:00	1989-08-08 11:00:00	1989-08-09 02:00:00	50	61	24	1.55595e+06
32	1989-08-08 13:00:00	1989-08-08 16:25:08	1989-08-08 18:00:00	0.4	1.5	13.3	1989-08-08 13:15:00	1989-08-08 13:15:00	1989-08-09 02:00:00	56	56	24	232888
33	1989-08-09 05:30:00	1989-08-09 12:29:58	1989-08-09 21:00:00	0.499892	3.5	14.8	1989-08-09 10:00:00	1989-08-09 22:00:00	1989-08-10 08:00:00	17.125	41	12	342028
34	1989-08-10 11:20:00	1989-08-11 13:29:58	1989-08-11 22:00:00	2.19991	17.9	18.3	1989-08-10 12:00:00	1989-08-12 20:00:00	1989-08-14 13:00:00	29	79	14.125	1.96262e+07
35	1989-08-12 23:00:00	1989-08-13 05:37:26	1989-08-13 07:00:00	0.712488	2	34.9	1989-08-12 23:00:00	1989-08-13 02:00:00	1989-08-13 17:00:00	96.375	328	104.875	7162875
36	1989-08-16 11:00:00	1989-08-16 11:30:00	1989-08-16 16:00:00	0.1	0.6	32.1	1989-08-16 13:00:00	1989-08-17 15:00:00	1989-08-18 17:00:00	6.5625	51	12.4625	4.69163e+06
37	1989-08-19 11:00:00	1989-08-19 13:30:02	1989-08-19 20:00:00	0.399934	2.3	6	1989-08-20 10:00:00	1989-08-20 15:00:00	1989-08-20 18:00:00	50	145	57	812447
38	1989-09-07 20:10:00	1989-09-08 01:29:58	1989-09-09 07:00:00	1.99943	28	0	1989-09-08 07:00:00	1989-09-10 04:00:00	1989-09-14 03:00:00	22.375	89	7.8	2.2128e+07
39	1989-09-09 12:30:00	1989-09-09 15:29:59	1989-09-10 11:00:00	0.799997	4.7	28	1989-09-09 21:00:00	1989-09-10 16:00:00	1989-09-12 04:00:00	47.25	121	40	7.58011e+06
40	1989-12-30 12:00:00	1989-12-30 12:30:00	1989-12-30 14:00:00	0.1	0.3	0	1989-12-31	1989-12-31 02:00:00	1989-12-31 10:00:00	4.0625	9.6	4	90870.5
41	1990-02-08 02:00:00	1990-02-08 03:30:01	1990-02-08 05:00:00	0.199967	0.5	0	1990-02-08 02:00:00	1990-02-08 02:15:00	1990-02-08 06:00:00	24	24	22	7200
42	1990-02-12 18:00:00	1990-02-13 04:29:59	1990-02-14 05:00:00	1.59998	13.4	0.5	1990-02-12 21:00:00	1990-02-14 15:00:00	1990-02-15	20.125	36	15	1.57515e+06
43	1990-02-16 13:05:27	1990-02-16 13:35:27	1990-02-16 16:00:00	1.00833	2.2	17.7	1990-02-16 14:00:00	1990-02-16 16:00:00	1990-02-17 06:00:00	22.75	26	7.8	126837
44	1990-02-17 17:00:00	1990-02-17 23:50:33	1990-02-18 04:00:00	0.2	1.6	19.9	1990-02-18 09:00:00	1990-02-18 23:00:00	1990-02-19 08:00:00	12.75	30	22.375	595069
45	1990-02-18 14:00:00	1990-02-18 14:30:00	1990-02-18 16:00:00	0.1	0.3	21.5	1990-02-18 14:00:00	1990-02-19 13:00:00	1990-02-19 23:00:00	20.125	48	16	1.12919e+06
46	1990-03-03 15:00:00	1990-03-03 16:30:01	1990-03-03 18:00:00	0.299967	0.8	0	1990-03-03 18:00:00	1990-03-03 21:00:00	1990-03-05 05:00:00	13.375	22	14	862260
47	1990-04-04 11:00:00	1990-04-04 12:30:13	1990-04-05 05:00:00	0.5	4.8	0	1990-04-04 11:15:00	1990-04-04 11:15:00	1990-04-05 18:00:00	187	174.25	58	34935.4
48	1990-04-05 12:00:00	1990-04-05 12:30:00	1990-04-05 17:00:00	0.1	0.6	4.8	1990-04-05 12:15:00	1990-04-05 12:15:00	1990-04-05 18:00:00	72	71.75	58	1398.91
49	1990-04-08 14:00:00	1990-04-08 16:28:50	1990-04-08 18:00:00	0.2	0.8	5.4	1990-04-08 14:15:00	1990-04-08 17:45:00	1990-04-10 17:00:00	136	136	94	3397500
50	1990-04-09 02:00:00	1990-04-09 04:29:56	1990-04-09 05:00:00	0.199899	0.5	6.2	1990-04-09 02:15:00	1990-04-09 04:45:00	1990-04-10 17:00:00	136	136	94	2490300
51	1990-04-09 10:00:00	1990-04-09 10:30:00	1990-04-09 15:00:00	0.1	0.6	6.7	1990-04-10 12:00:00	1990-04-10 13:00:00	1990-04-10 17:00:00	137.875	141	94	28603.1
52	1990-04-12 14:00:00	1990-04-12 14:30:00	1990-04-12 21:00:00	0.1	0.8	1.9	1990-04-12 14:00:00	1990-04-12 14:15:00	1990-04-13 06:00:00	149	149	91	678347
53	1990-04-16 13:00:00	1990-04-16 13:30:00	1990-04-16 16:00:00	0.1	0.4	1.1	1990-04-16 16:00:00	1990-04-17 06:00:00	1990-04-20 20:00:00	142.875	406	228	6.24175e+07
54	1990-04-25 10:00:00	1990-04-25 10:30:00	1990-04-25 15:00:00	0.1	0.6	5.1	1990-04-25 10:15:00	1990-04-25 10:15:00	1990-04-25 17:00:00	175	173.5	160	9100
55	1990-04-26 11:00:00	1990-04-26 11:30:00	1990-04-26 14:00:00	0.1	0.4	5.6	1990-04-26 11:15:00	1990-04-26 11:15:00	1990-04-26 16:00:00	157	157	154	852.632
56	1990-04-27 15:00:00	1990-04-27 15:30:00	1990-04-27 20:00:00	0.1	0.6	6	1990-04-27 23:00:00	1990-04-28	1990-04-30 07:00:00	142.875	146	108	3.58327e+06
57	1990-04-28 02:00:00	1990-04-28 03:19:53	1990-04-28 05:00:00	0.3	0.8	6.6	1990-04-28 02:15:00	1990-04-28 04:45:00	1990-04-30 07:00:00	146	146	108	3053700
58	1990-04-28 17:00:00	1990-04-28 18:30:01	1990-04-28 21:00:00	0.499934	1.3	7.3	1990-04-29 13:00:00	1990-04-29 19:00:00	1990-04-30 07:00:00	147.875	160	108	622355
59	1990-05-26 13:00:00	1990-05-26 13:30:00	1990-05-26 21:00:00	0.1	0.9	0	1990-05-26 13:15:00	1990-05-26 13:15:00	1990-05-27 02:00:00	130	120.25	28.8036	0
60	1990-05-27 11:00:00	1990-05-27 13:30:02	1990-05-27 17:00:00	0.2	0.8	0.9	1990-05-27 14:00:00	1990-05-28 14:00:00	1990-05-31 04:00:00	26.4917	269	116.25	5.22863e+07
61	1990-05-27 23:00:00	1990-05-28 01:28:50	1990-05-28 03:00:00	0.2	0.8	1.7	1990-05-28 05:00:00	1990-05-28 23:15:00	1990-05-29 01:00:00	38.2333	513	380.25	2.40833e+06
62	1990-05-28 15:20:00	1990-05-28 19:30:02	1990-05-28 23:00:00	3.29987	15.2	2.5	1990-05-28 17:00:00	1990-05-29 18:00:00	1990-05-29 20:00:00	218.75	882	702.25	6.52374e+06
63	1990-06-01 12:30:00	1990-06-01 15:55:08	1990-06-01 18:00:00	0.4	1.7	37.1	1990-06-01 15:00:00	1990-06-02 06:00:00	1990-06-02 19:00:00	244	333	50.2188	4.8201e+06
64	1990-06-11 16:10:00	1990-06-11 18:24:54	1990-06-12 02:00:00	1.9	7	0	1990-06-11 22:00:00	1990-06-12 06:00:00	1990-06-12 12:00:00	904.5	1740	1437.5	1.24846e+07
65	1990-07-07 10:00:00	1990-07-07 20:30:05	1990-07-07 23:00:00	1.89966	8	13.5	1990-07-08 01:00:00	1990-07-08 08:00:00	1990-07-08 09:00:00	176.5	231	163	387225
66	1990-07-08 05:00:00	1990-07-08 10:30:05	1990-07-08 21:00:00	0.7	6.3	21.5	1990-07-08 07:00:00	1990-07-09 10:00:00	1990-07-09 23:00:00	203	532	8.8625	1.08085e+07
67	1990-07-10 10:00:00	1990-07-10 12:28:50	1990-07-10 15:00:00	0.2	0.9	22	1990-07-10 11:00:00	1990-07-10 16:00:00	1990-07-11 12:00:00	100.625	163	8.25	2.82133e+06
68	1990-07-11 10:00:00	1990-07-11 12:28:50	1990-07-11 14:00:00	0.2	0.8	21.7	1990-07-11 13:00:00	1990-07-11 15:00:00	1990-07-12 04:00:00	21.4375	94	30	1.78677e+06
69	1990-07-14 13:00:00	1990-07-14 14:30:01	1990-07-14 17:00:00	0.199967	0.6	4.9	1990-07-14 13:15:00	1990-07-14 13:15:00	1990-07-14 21:00:00	120	120	106.5	74866.9
70	1990-07-15 06:00:00	1990-07-15 19:29:57	1990-07-16 13:00:00	0.799856	5.7	5.5	1990-07-15 14:00:00	1990-07-15 21:00:00	1990-07-16 16:00:00	67.75	143	36	1.68474e+06
71	1990-07-21 07:00:00	1990-07-21 13:30:01	1990-07-21 18:00:00	0.599907	2.7	13.3	1990-07-21 07:00:00	1990-07-21 08:00:00	1990-07-22 06:00:00	226.625	231	123	260984
72	1990-07-22 10:30:00	1990-07-22 12:29:58	1990-07-22 20:00:00	0.399966	1.8	16	1990-07-22 18:00:00	1990-07-22 21:00:00	1990-07-23 02:00:00	92.875	211	89	701947
73	1990-07-23 12:00:00	1990-07-23 13:30:01	1990-07-23 16:00:00	0.999801	1.9	17.8	1990-07-23 12:00:00	1990-07-23 17:00:00	1990-07-24 02:00:00	165.25	175	151	419958
74	1990-07-24 10:00:00	1990-07-25 03:30:02	1990-07-25 05:00:00	0.59988	3.7	19.7	1990-07-24 10:15:00	1990-07-24 10:15:00	1990-07-25 09:00:00	146	146	95.75	216220
75	1990-07-26 14:00:00	1990-07-26 14:30:00	1990-07-26 18:00:00	0.1	0.5	10.1	1990-07-26 18:00:00	1990-07-27 14:00:00	1990-07-28 12:00:00	77.375	136	83.75	2.211e+06
76	1990-08-01 12:00:00	1990-08-01 18:58:46	1990-08-01 21:00:00	0.2	0.9	6.2	1990-08-01 13:00:00	1990-08-01 15:00:00	1990-08-02	19.75	24	19.375	82968.8
77	1990-08-02 05:00:00	1990-08-02 13:29:57	1990-08-02 18:00:00	0.49993	2.4	6.6	1990-08-02 21:00:00	1990-08-03 18:00:00	1990-08-08 14:00:00	12.625	20	8.0625	1.43594e+07
78	1990-08-03 11:12:00	1990-08-03 13:30:00	1990-08-03 16:00:00	0.999896	3.2	8.7	1990-08-03 13:00:00	1990-08-04 08:00:00	1990-08-08 14:00:00	9.075	47	8.0625	1.4969e+07
79	1990-08-04 09:15:00	1990-08-04 11:30:00	1990-08-04 21:00:00	1.19994	4.4	10.2	1990-08-04 15:00:00	1990-08-05 14:00:00	1990-08-05 17:00:00	40	64	45	248590
80	1990-08-05 15:20:00	1990-08-05 15:50:00	1990-08-05 18:00:00	0.3	0.8	10.9	1990-08-05 21:00:00	1990-08-06 12:00:00	1990-08-06 20:00:00	49.5	103	55	1.35921e+06
81	1990-08-09 12:00:00	1990-08-09 13:43:26	1990-08-09 17:00:00	0.3	1.4	5.3	1990-08-09 13:00:00	1990-08-10 15:00:00	1990-08-11 03:00:00	8.625	64	14	1.89164e+06
82	1990-08-11 11:00:00	1990-08-11 13:29:56	1990-08-12 14:00:00	2.7991	13.3	5.2	1990-08-11 14:00:00	1990-08-12 21:00:00	1990-08-13	11.375	184	50.375	1.96599e+06
83	1990-08-13 13:00:00	1990-08-13 14:30:01	1990-08-13 19:00:00	0.199967	0.8	17.7	1990-08-13 13:15:00	1990-08-13 13:15:00	1990-08-14 03:00:00	69	69	61.125	82478.9
84	1990-08-14 10:00:00	1990-08-14 15:29:59	1990-08-14 20:00:00	0.299996	1.6	18.5	1990-08-14 12:00:00	1990-08-14 16:00:00	1990-08-15 01:00:00	34.375	58	31.75	471319
85	1990-08-16 11:00:00	1990-08-16 16:30:23	1990-08-17	1	6.4	17.3	1990-08-16 11:00:00	1990-08-16 17:00:00	1990-08-17 13:00:00	60	85	17.125	1.84149e+06
86	1990-08-20 12:00:00	1990-08-20 14:58:59	1990-08-20 16:00:00	0.2	0.8	10.4	1990-08-20 12:00:00	1990-08-21 02:00:00	1990-08-21 15:00:00	33.25	46	36.375	287902
87	1990-08-21 13:00:00	1990-08-21 13:30:00	1990-08-21 15:00:00	0.1	0.3	9.6	1990-08-21 13:00:00	1990-08-21 13:15:00	1990-08-21 18:00:00	39.625	39.75	36	1603.12
88	1990-08-22 07:00:00	1990-08-22 10:30:03	1990-08-22 18:00:00	0.1	0.7	9.9	1990-08-22 15:00:00	1990-08-23 14:00:00	1990-08-27 05:00:00	13.25	54	9.72188	6.9161e+06
89	1990-08-31 08:20:00	1990-08-31 09:29:58	1990-08-31 16:00:00	0.499933	1.8	2.7	1990-08-31 12:00:00	1990-08-31 15:00:00	1990-09-01 02:00:00	11.0625	71	26	920407
90	1990-09-01 09:30:00	1990-09-01 12:29:59	1990-09-01 15:00:00	2.19999	7.8	4.5	1990-09-01 15:00:00	1990-09-02 11:00:00	1990-09-02 15:00:00	26.125	31	26	67903.1
91	1990-09-03 13:00:00	1990-09-03 13:30:00	1990-09-03 20:00:00	0.1	0.7	16.8	1990-09-03 13:00:00	1990-09-03 13:15:00	1990-09-03 23:00:00	163.375	166.25	84.75	218084
92	1990-09-05 09:30:00	1990-09-05 11:29:58	1990-09-05 14:00:00	0.599898	1.9	17.5	1990-09-05 11:00:00	1990-09-05 18:00:00	1990-09-08 14:00:00	9.375	79	21	1.32655e+07
93	1990-09-09 12:00:00	1990-09-09 12:30:00	1990-09-09 18:00:00	0.1	0.7	2.6	1990-09-09 12:00:00	1990-09-09 14:00:00	1990-09-09 20:00:00	11.375	14	7.5	25560
94	1990-10-16 20:20:00	1990-10-16 21:29:58	1990-10-16 23:00:00	1.09973	2.1	0.4	1990-10-16 21:00:00	1990-10-16 23:00:00	1990-10-17 13:00:00	7.725	8.7	2.4	28906.5
95	1991-04-07 16:00:00	1991-04-07 21:30:17	1991-04-08 01:00:00	0.3	1.3	0	1991-04-07 16:00:00	1991-04-07 18:00:00	1991-04-08 03:00:00	1.925	5.1	2.1	41527.3
96	1991-04-10 10:00:00	1991-04-10 11:30:13	1991-04-10 15:00:00	0.5	2.1	1.3	1991-04-10 12:00:00	1991-04-11 07:00:00	1991-04-11 22:00:00	2.725	15	2.6375	865637
97	1991-05-28 16:00:00	1991-05-28 16:30:00	1991-05-28 18:00:00	0.1	0.3	14.2	1991-05-28 19:00:00	1991-05-29 07:00:00	1991-05-30 03:00:00	179.125	262	1.9875	4.54316e+06
98	1991-06-05 10:00:00	1991-06-05 16:30:01	1991-06-05 19:00:00	0.5	2.5	52.2	1991-06-05 10:00:00	1991-06-05 10:15:00	1991-06-05 22:00:00	1630	1640	1225	36281.2
99	1991-06-06 06:00:00	1991-06-06 16:30:05	1991-06-06 20:00:00	0.999507	5.3	54.8	1991-06-06 06:00:00	1991-06-07 08:00:00	1991-06-07 18:00:00	1502.5	1700	1221.25	9.26817e+06
100	1991-06-14 06:00:00	1991-06-14 13:25:19	1991-06-14 17:00:00	1	5	3.5	1991-06-14 06:00:00	1991-06-15 11:00:00	1991-06-15 15:00:00	1086.25	1420	1221.25	3.52999e+06
101	1991-07-09 11:00:00	1991-07-09 14:29:57	1991-07-09 20:00:00	0.599864	2.3	5.3	1991-07-09 11:00:00	1991-07-09 18:00:00	1991-07-10 03:00:00	108	154	68	898538
102	1991-07-12 10:00:00	1991-07-12 12:30:02	1991-07-12 16:00:00	0.499934	1.9	7.6	1991-07-12 17:00:00	1991-07-12 19:00:00	1991-07-14 04:00:00	107.375	248	141	8.68617e+06
103	1991-07-16 12:00:00	1991-07-16 14:28:50	1991-07-16 16:00:00	0.2	0.8	1.9	1991-07-16 13:00:00	1991-07-16 14:00:00	1991-07-16 17:00:00	35.375	36	35	1919.53
104	1991-07-17 11:00:00	1991-07-17 11:30:00	1991-07-17 22:00:00	0.4	1.9	2.7	1991-07-17 11:00:00	1991-07-17 18:00:00	1991-07-18 02:00:00	33	36	33	86400
105	1991-07-18 06:00:00	1991-07-18 16:50:20	1991-07-18 19:00:00	0.2	1.4	4.6	1991-07-18 07:00:00	1991-07-18 12:00:00	1991-07-24 02:00:00	32.75	36	21	4.46546e+07
106	1991-07-19 10:20:00	1991-07-19 11:29:58	1991-07-19 19:00:00	0.499933	2	4.1	1991-07-19 10:35:00	1991-07-20	1991-07-20 04:00:00	138	138	126.125	44606.3
107	1991-07-20 10:00:00	1991-07-20 13:29:57	1991-07-20 20:00:00	0.699933	4.5	6.1	1991-07-20 13:00:00	1991-07-21 17:00:00	1991-07-22 06:00:00	85.25	157	52.25	4.64565e+06
108	1991-07-22 08:00:00	1991-07-22 13:29:59	1991-07-23	3.7	20.7	17.5	1991-07-22 08:00:00	1991-07-22 18:00:00	1991-07-23 06:00:00	60.875	918	221.75	9.71706e+06
109	1991-07-31 12:00:00	1991-07-31 14:29:56	1991-07-31 16:00:00	0.399899	1.2	2.4	1991-08-01 14:00:00	1991-08-01 15:00:00	1991-08-02 02:00:00	22.75	24	23	43767.2
110	1991-08-01 11:00:00	1991-08-01 12:30:01	1991-08-01 18:00:00	0.699934	2.7	1.2	1991-08-01 14:00:00	1991-08-02 10:00:00	1991-08-02 17:00:00	22.75	25	15.25	443300
111	1991-08-02 22:00:00	1991-08-03 22:29:58	1991-08-04 05:00:00	0.799914	9.1	9.6	1991-08-02 22:00:00	1991-08-03 07:00:00	1991-08-04 07:00:00	129.875	196	88.5	286342
112	1991-08-05 06:00:00	1991-08-06 01:57:43	1991-08-06 05:00:00	0.1	2.4	18.7	1991-08-05 20:00:00	1991-08-06 22:00:00	1991-08-08 08:00:00	31.375	187	61	1.01255e+07
113	1991-08-06 10:30:00	1991-08-06 12:30:04	1991-08-06 20:00:00	0.999864	4.8	21.1	1991-08-06 11:00:00	1991-08-07 14:00:00	1991-08-08 08:00:00	44.375	205	61	9.62429e+06
114	1991-08-08 11:00:00	1991-08-08 15:33:53	1991-08-08 19:00:00	0.4	2.2	17	1991-08-08 17:00:00	1991-08-08 22:00:00	1991-08-09 02:00:00	50.25	73	55	271806
115	1991-08-10 11:00:00	1991-08-10 13:30:02	1991-08-10 16:00:00	0.999867	3.6	10.3	1991-08-10 17:00:00	1991-08-11 14:00:00	1991-08-11 20:00:00	27.75	67	35.25	1664275
116	1991-08-12 12:00:00	1991-08-12 18:30:01	1991-08-12 21:00:00	0.299969	1.7	8.4	1991-08-12 12:00:00	1991-08-12 17:00:00	1991-08-13 02:00:00	96.625	128	99	928107
117	1991-08-13 11:08:34	1991-08-13 11:38:34	1991-08-13 15:00:00	0.685667	2	10.1	1991-08-13 12:00:00	1991-08-14 07:00:00	1991-08-14 09:00:00	103	123	85	1.38009e+06
118	1991-08-14 14:00:00	1991-08-14 14:30:00	1991-08-14 18:00:00	0.1	0.3	9.2	1991-08-14 14:00:00	1991-08-14 18:00:00	1991-08-15	87.25	95	85	195137
119	1991-08-15 15:00:00	1991-08-15 20:20:34	1991-08-15 22:00:00	0.2	1.2	9.5	1991-08-15 15:00:00	1991-08-16 19:00:00	1991-08-17 10:00:00	67	178	80.5	4.38128e+06
120	1991-08-16 10:00:00	1991-08-16 12:29:56	1991-08-16 19:00:00	0.599899	3.1	10.5	1991-08-16 10:00:00	1991-08-16 23:00:00	1991-08-17 10:00:00	66.25	199	80.5	4.37183e+06
121	1991-08-18 11:00:00	1991-08-18 17:20:23	1991-08-18 19:00:00	0.2	1.2	8.3	1991-08-18 11:00:00	1991-08-18 22:00:00	1991-08-19	67.25	149	45.125	365034
122	1991-08-19 05:30:00	1991-08-19 08:29:59	1991-08-19 16:00:00	0.499998	2.6	7.8	1991-08-19 09:00:00	1991-08-19 11:00:00	1991-08-19 23:00:00	66.5	114	77	1.33104e+06
123	1991-08-20 10:00:00	1991-08-20 10:30:00	1991-08-20 19:00:00	0.5	1.9	8.7	1991-08-20 10:00:00	1991-08-20 15:00:00	1991-08-21 06:00:00	59	97	25.375	1.64797e+06
124	1991-08-23 10:00:00	1991-08-23 10:30:00	1991-08-23 16:00:00	0.1	0.5	6	1991-08-23 19:00:00	1991-08-24 15:00:00	1991-08-25 13:00:00	11.625	77	24	4.93242e+06
125	1991-08-25 13:20:00	1991-08-25 14:50:13	1991-08-25 17:00:00	0.4	1.3	3.1	1991-08-25 15:00:00	1991-08-25 16:00:00	1991-08-25 18:00:00	24.75	26	21	14287.5
126	1991-08-26 11:30:00	1991-08-26 16:20:25	1991-08-26 21:00:00	0.2	1.6	2.3	1991-08-26 14:00:00	1991-08-26 16:00:00	1991-08-27	20	21	19	30600
127	1991-08-27 11:00:00	1991-08-27 13:30:02	1991-08-27 16:00:00	0.399868	1.3	3.9	1991-08-28 03:00:00	1991-08-28 10:00:00	1991-08-29 22:00:00	15.375	41	19	2.36647e+06
128	1991-08-28 12:00:00	1991-08-28 15:25:08	1991-08-28 18:00:00	0.4	1.8	5.4	1991-08-28 16:00:00	1991-08-28 17:00:00	1991-08-28 20:00:00	46.75	73	33	85682.8
129	1991-09-01 16:00:00	1991-09-01 18:30:02	1991-09-01 23:00:00	0.299934	1.3	3.3	1991-09-01 16:00:00	1991-09-02 15:00:00	1991-09-02 22:00:00	19	65	21.75	1281780
130	1991-09-04 13:15:00	1991-09-04 15:11:40	1991-09-04 16:00:00	0.6	1.6	1.3	1991-09-04 14:00:00	1991-09-05 13:00:00	1991-09-06 19:00:00	18.375	23	7.875	1.43097e+06
131	1991-09-05 12:00:00	1991-09-05 12:30:00	1991-09-05 14:00:00	0.1	0.3	2.9	1991-09-05 12:00:00	1991-09-05 23:00:00	1991-09-06 03:00:00	22.375	25	21	65743.1
132	1991-09-07 11:00:00	1991-09-07 14:28:39	1991-09-07 16:00:00	0.2	0.8	4	1991-09-07 11:00:00	1991-09-07 16:00:00	1991-09-07 22:00:00	36.75	53	20	284288
133	1991-09-10 01:00:00	1991-09-10 01:30:00	1991-09-10 03:00:00	0.1	0.3	3.7	1991-09-10 02:00:00	1991-09-10 03:00:00	1991-09-10 10:00:00	26.375	27	22.625	16488.3
134	1991-09-10 15:00:00	1991-09-10 15:30:00	1991-09-10 17:00:00	0.1	0.3	2.4	1991-09-10 15:00:00	1991-09-10 15:15:00	1991-09-10 23:00:00	23.625	23.75	19	14639.1
135	1991-09-11 13:00:00	1991-09-11 17:30:04	1991-09-11 22:00:00	0.599868	2	2.4	1991-09-11 13:00:00	1991-09-12 02:00:00	1991-09-12 09:00:00	19.75	24	20	124765
136	1991-09-12 18:00:00	1991-09-12 18:30:00	1991-09-12 21:00:00	0.1	0.4	3.6	1991-09-13 05:00:00	1991-09-13 09:00:00	1991-09-13 19:00:00	40.5	112	12.375	1.84551e+06
137	1991-10-28 03:00:00	1991-10-28 04:30:01	1991-10-28 13:00:00	0.599835	1.7	3.4	1991-10-28 08:00:00	1991-10-28 10:00:00	1991-10-29 04:00:00	5.6875	6.5	5.5	32988.5
138	1991-10-29 17:00:00	1991-10-29 20:25:08	1991-10-30 08:00:00	0.4	3.7	5.1	1991-10-29 17:00:00	1991-10-30	1991-10-30 12:00:00	7.1875	16	8.1	165408
139	1992-02-22 15:00:00	1992-02-22 18:58:49	1992-02-22 23:00:00	0.2	1.1	0	1992-02-22 15:15:00	1992-02-22 15:15:00	1992-02-23	3.8	3.8	3.5	1049.14
140	1992-03-03 23:08:34	1992-03-04 04:29:56	1992-03-05 05:00:00	12.497	50.3	0	1992-03-04 01:00:00	1992-03-04 14:00:00	1992-03-05 14:00:00	5.75	41	6.5	1.53817e+06
141	1992-03-28 11:00:00	1992-03-28 16:29:59	1992-03-29 03:00:00	0.699998	6	14.3	1992-03-28 16:00:00	1992-03-28 17:00:00	1992-03-29 06:00:00	10.9375	18	6	39376.4
142	1992-03-29 14:00:00	1992-03-29 15:30:07	1992-03-29 18:00:00	0.2	0.7	19.8	1992-03-29 14:15:00	1992-03-29 14:15:00	1992-03-30 04:00:00	6.2	6.2	5.8	8460
143	1992-03-31 07:30:00	1992-03-31 13:29:57	1992-03-31 16:00:00	0.399931	1.7	19.9	1992-03-31 09:00:00	1992-03-31 22:00:00	1992-04-01 08:00:00	19.75	94	54	1.72719e+06
144	1992-05-02 11:00:00	1992-05-02 11:30:00	1992-05-02 17:00:00	0.1	0.7	0	1992-05-02 11:00:00	1992-05-03 11:00:00	1992-05-03 13:00:00	228.5	673	427.375	3.13382e+06
145	1992-05-08 10:00:00	1992-05-08 10:30:00	1992-05-08 20:00:00	0.1	0.8	0.7	1992-05-08 13:00:00	1992-05-09 12:00:00	1992-05-09 18:00:00	100.25	360	287	9.95939e+06
146	1992-05-09 02:00:00	1992-05-09 10:30:03	1992-05-09 23:00:00	0.999707	5.8	0.8	1992-05-09 05:00:00	1992-05-10 09:00:00	1992-05-10 11:00:00	251.75	414	372.5	2.03507e+06
147	1992-05-12 10:00:00	1992-05-12 10:30:00	1992-05-12 14:00:00	0.1	0.5	6.6	1992-05-12 10:00:00	1992-05-13 14:00:00	1992-05-14 03:00:00	146.125	406	340	6.02115e+06
148	1992-05-21 08:20:00	1992-05-21 18:29:57	1992-05-21 23:00:00	1.49972	8.4	6.5	1992-05-21 08:35:00	1992-05-21 09:00:00	1992-05-22	649.5	678	320	896442
149	1992-05-22 07:00:00	1992-05-22 08:30:01	1992-05-22 17:00:00	0.199967	0.9	14.9	1992-05-22 07:00:00	1992-05-22 08:00:00	1992-05-22 18:00:00	591	616	311.125	1.18918e+06
150	1992-05-26 09:00:00	1992-05-26 20:58:10	1992-05-28 02:00:00	1.4	22	24	1992-05-26 09:00:00	1992-05-28 06:00:00	1992-05-28 18:00:00	485	823	79.625	4.40663e+07
151	1992-05-30 05:00:00	1992-05-30 12:30:02	1992-05-30 17:00:00	1.39987	7	31.1	1992-05-30 05:00:00	1992-05-30 09:00:00	1992-06-01 12:00:00	414.875	504	331.5	3.52937e+06
152	1992-05-31 08:20:00	1992-05-31 13:29:57	1992-06-01 10:00:00	1.99923	13.6	30	1992-06-01 01:00:00	1992-06-02 07:00:00	1992-06-03 04:00:00	277.5	410	302	9.8706e+06
153	1992-06-07 07:00:00	1992-06-07 13:30:01	1992-06-07 17:00:00	1.69963	4.6	2.8	1992-06-07 07:00:00	1992-06-07 12:00:00	1992-06-08 08:00:00	74.75	101	1.9	539680
154	1992-06-09 09:00:00	1992-06-09 11:30:02	1992-06-09 14:00:00	0.999735	3	10.7	1992-06-09 09:00:00	1992-06-09 14:00:00	1992-06-09 22:00:00	397	458	360	2030400
155	1992-06-19 12:12:00	1992-06-19 12:42:00	1992-06-19 19:00:00	0.406154	1.3	3.8	1992-06-19 18:00:00	1992-06-20 11:00:00	1992-06-20 18:00:00	344.125	542	406.625	5.87753e+06
156	1992-06-21 12:20:00	1992-06-21 14:30:05	1992-06-21 19:00:00	0.999165	3	6.6	1992-06-21 12:35:00	1992-06-21 12:45:00	1992-06-22	522.5	520.25	167.5	586425
157	1992-06-24 07:00:00	1992-06-24 13:30:01	1992-06-25 21:00:00	0.999875	15.4	12.4	1992-06-24 07:00:00	1992-06-24 16:30:00	1992-06-25 22:00:00	214.75	960	376	3.86061e+07
158	1992-07-11 11:08:34	1992-07-11 13:30:05	1992-07-11 17:00:00	1.10763	3	1.1	1992-07-11 12:00:00	1992-07-11 22:00:00	1992-07-11 23:00:00	98.75	157	101.375	1.01514e+06
159	1992-07-14 06:00:00	1992-07-15 13:31:00	1992-07-15 20:00:00	0.2	4.4	4	1992-07-15 08:00:00	1992-07-16 13:00:00	1992-07-18 23:00:00	38.25	118	56	9.25628e+06
160	1992-07-17 14:00:00	1992-07-17 14:30:00	1992-07-17 16:00:00	0.2	0.4	8.8	1992-07-17 14:15:00	1992-07-18	1992-07-18 23:00:00	224	224	56	426688
161	1992-07-18 13:00:00	1992-07-18 13:30:00	1992-07-18 15:00:00	0.1	0.3	8.7	1992-07-18 13:15:00	1992-07-18 13:15:00	1992-07-18 23:00:00	88	87.25	56	0
162	1992-08-04 11:00:00	1992-08-04 11:30:00	1992-08-04 19:00:00	0.2	1.1	6.2	1992-08-04 11:00:00	1992-08-04 19:00:00	1992-08-05	29.25	65	28.625	807402
163	1992-08-21 10:00:00	1992-08-21 18:29:57	1992-08-21 20:00:00	0.39993	1.8	12.9	1992-08-22 01:00:00	1992-08-22 03:00:00	1992-08-22 11:00:00	52	53	41	106425
164	1992-08-23 10:15:00	1992-08-24 04:30:01	1992-08-24 21:00:00	1.49961	17.6	12.6	1992-08-24 03:00:00	1992-08-24 11:00:00	1992-08-24 22:00:00	27.5	221	12	3.06364e+06
165	1992-10-06 18:00:00	1992-10-06 22:28:58	1992-10-07 04:00:00	0.2	1.4	0	1992-10-06 20:00:00	1992-10-07 01:00:00	1992-10-07 06:00:00	15.875	22	16	122459
166	1993-01-19 15:00:00	1993-01-19 20:29:59	1993-01-20	0.199998	1.1	1.1	1993-01-19 20:00:00	1993-01-20 15:00:00	1993-01-20 17:00:00	31.75	40	31	107317
167	1993-01-22 12:00:00	1993-01-22 12:30:00	1993-01-22 23:00:00	0.5	1.8	2.2	1993-01-22 12:00:00	1993-01-23 14:00:00	1993-01-23 17:00:00	30.375	41	30	187623
168	1993-02-01 14:30:00	1993-02-01 16:29:58	1993-02-01 19:00:00	0.599932	1.9	0	1993-02-01 16:00:00	1993-02-02 17:00:00	1993-02-05 21:00:00	17.75	22	19	1.50446e+06
169	1993-02-09 07:00:00	1993-02-09 12:30:29	1993-02-10 17:00:00	1.2	14.4	1.7	1993-02-09 07:00:00	1993-02-11 12:00:00	1993-02-11 15:00:00	18.375	30	27	216769
170	1993-02-16 06:00:00	1993-02-16 07:30:01	1993-02-16 11:00:00	0.199967	0.7	1.3	1993-02-16 06:00:00	1993-02-16 14:00:00	1993-02-16 21:00:00	14.625	26	17.375	180390
171	1993-02-16 16:00:00	1993-02-16 16:30:00	1993-02-16 21:00:00	0.1	0.6	2	1993-02-16 22:00:00	1993-02-17 15:00:00	1993-02-18	18.75	26	12.75	230123
172	1993-02-19 07:30:00	1993-02-19 13:30:03	1993-02-19 17:00:00	0.799608	4.4	2.7	1993-02-19 08:00:00	1993-02-20 16:00:00	1993-02-20 22:00:00	15.5	36	30.375	917156
173	1993-02-23 17:00:00	1993-02-24 16:52:11	1993-02-25 05:00:00	0.4	4.4	5.6	1993-02-24	1993-02-25 11:00:00	1993-02-25 16:00:00	21	31	26	131991
174	1993-03-16 17:00:00	1993-03-16 17:30:00	1993-03-16 20:00:00	0.1	0.4	1.5	1993-03-16 17:00:00	1993-03-16 18:00:00	1993-03-16 21:00:00	33.75	35	33.375	5203.13
175	1993-03-17 11:00:00	1993-03-17 12:43:26	1993-03-17 15:00:00	0.3	1	1.9	1993-03-17 11:00:00	1993-03-17 11:15:00	1993-03-17 21:00:00	34	34	28	14715
176	1993-03-20 21:00:00	1993-03-21 00:30:03	1993-03-21 03:00:00	0.399802	1.3	2.9	1993-03-20 21:00:00	1993-03-22 03:00:00	1993-03-22 05:00:00	29.625	33	31	13769.8
177	1993-03-31 09:00:00	1993-03-31 15:50:33	1993-03-31 18:00:00	0.2	1.4	38.1	1993-03-31 09:00:00	1993-03-31 11:00:00	1993-03-31 22:00:00	38.75	43	36	79312.5
178	1993-04-02 11:00:00	1993-04-02 13:28:50	1993-04-02 17:00:00	0.2	1.1	25.6	1993-04-02 13:00:00	1993-04-03	1993-04-03 12:00:00	33.75	48	36.75	317475
179	1993-04-03 01:00:00	1993-04-03 01:30:00	1993-04-03 05:00:00	0.1	0.5	26.7	1993-04-03 01:15:00	1993-04-03 01:15:00	1993-04-03 12:00:00	48	48	36.75	11380.8
180	1993-04-05 13:00:00	1993-04-05 22:29:58	1993-04-06 01:00:00	2.29989	7.1	3.6	1993-04-05 13:00:00	1993-04-05 14:00:00	1993-04-06 04:00:00	56.125	68	61	47182.5
181	1993-04-09 21:00:00	1993-04-09 22:30:13	1993-04-10 01:00:00	0.3	0.9	8.2	1993-04-09 21:00:00	1993-04-10 09:00:00	1993-04-10 16:00:00	30	36	34	77838.2
182	1993-04-11 09:00:00	1993-04-11 10:30:01	1993-04-11 13:00:00	0.299967	0.9	8.7	1993-04-11 09:00:00	1993-04-11 16:00:00	1993-04-11 20:00:00	30.75	40	35.375	68568.8
183	1993-04-11 22:00:00	1993-04-12 19:29:54	1993-04-13 03:00:00	1.99834	15.9	2.5	1993-04-12 04:00:00	1993-04-12 20:00:00	1993-04-13 04:00:00	34.75	67	48.625	248386
184	1993-06-02 03:30:00	1993-06-02 17:30:01	1993-06-03 03:00:00	1.09997	13.1	5.9	1993-06-02 04:00:00	1993-06-03 13:00:00	1993-06-04 12:00:00	350.875	1490	1118.75	5.11612e+07
185	1993-06-03 13:00:00	1993-06-03 15:58:59	1993-06-03 19:00:00	0.2	1.1	13.2	1993-06-03 13:00:00	1993-06-03 15:00:00	1993-06-03 21:00:00	1478.75	1490	1337.5	441949
186	1993-06-05 08:00:00	1993-06-05 13:29:59	1993-06-05 18:00:00	0.399998	1.4	14.3	1993-06-06 02:00:00	1993-06-06 10:00:00	1993-06-06 23:00:00	1031.25	1300	972	9.49695e+06
187	1993-06-06 14:00:00	1993-06-07 00:29:59	1993-06-07 04:00:00	0.599996	3.1	15.7	1993-06-07 01:00:00	1993-06-07 09:00:00	1993-06-08 21:00:00	990	1480	794	3.76793e+07
188	1993-06-17 05:30:00	1993-06-17 16:29:57	1993-06-18 17:00:00	4.09923	27.1	8.6	1993-06-17 06:00:00	1993-06-19 13:00:00	1993-06-20 23:00:00	875.25	2680	1897.5	1.92952e+08
189	1993-07-10 11:00:00	1993-07-10 11:30:00	1993-07-10 13:00:00	0.1	0.3	0.9	1993-07-10 11:15:00	1993-07-10 12:00:00	1993-07-10 19:00:00	352	356	250.875	561228
190	1993-07-14 10:00:00	1993-07-14 12:39:15	1993-07-14 18:00:00	0.6	3.6	13.3	1993-07-14 11:00:00	1993-07-14 14:00:00	1993-07-16 01:00:00	558.25	888	463	2.8163e+07
191	1993-08-02 11:00:00	1993-08-02 14:28:39	1993-08-02 16:00:00	0.2	0.9	0	1993-08-02 11:15:00	1993-08-02 11:15:00	1993-08-03 07:00:00	56	56	42.25	364613
192	1993-08-06 13:00:00	1993-08-06 13:30:00	1993-08-06 15:00:00	0.1	0.3	10.6	1993-08-06 14:00:00	1993-08-06 22:00:00	1993-08-07 03:00:00	146	238	108	1.58739e+06
193	1993-08-14 13:00:00	1993-08-14 15:58:59	1993-08-14 20:00:00	0.2	1.2	8.6	1993-08-15 10:00:00	1993-08-15 15:00:00	1993-08-16 06:00:00	31.625	143	22	2.96241e+06
194	1993-08-19 12:00:00	1993-08-19 12:30:00	1993-08-19 18:00:00	0.1	0.6	1.8	1993-08-19 15:00:00	1993-08-20 08:00:00	1993-08-20 10:00:00	33.125	38	33	74913.2
195	1993-08-20 14:00:00	1993-08-20 14:30:00	1993-08-20 18:00:00	0.4	0.9	1.2	1993-08-20 18:00:00	1993-08-20 21:00:00	1993-08-22 20:00:00	21.875	99	22	1.05868e+07
196	1993-08-25 18:00:00	1993-08-25 20:28:50	1993-08-25 23:00:00	0.2	1	2.3	1993-08-25 18:15:00	1993-08-25 18:15:00	1993-08-26 11:00:00	75	75	72	85050
197	1993-09-01 10:00:00	1993-09-01 10:30:00	1993-09-01 16:00:00	0.1	0.5	0.9	1993-09-01 10:00:00	1993-09-02 13:00:00	1993-09-02 19:00:00	15.375	22	9.075	178338
198	1993-09-02 01:00:00	1993-09-02 09:29:57	1993-09-02 11:00:00	1.4994	4.4	1.3	1993-09-02 12:00:00	1993-09-03 11:00:00	1993-09-07 06:00:00	15.125	51	19	2.09835e+07
199	1993-09-05 08:00:00	1993-09-05 16:30:03	1993-09-05 19:00:00	1.19961	4.9	5	1993-09-06 02:00:00	1993-09-06 19:00:00	1993-09-07 06:00:00	38.75	66	19	1.45855e+06
200	1993-09-06 11:00:00	1993-09-06 12:30:01	1993-09-06 19:00:00	0.399934	1.4	9.9	1993-09-06 15:00:00	1993-09-06 22:00:00	1993-09-07 06:00:00	42.125	78	19	793434
201	1993-09-07 06:00:00	1993-09-07 16:29:59	1993-09-07 18:00:00	0.499996	3.2	11.2	1993-09-07 14:00:00	1993-09-07 16:00:00	1993-09-07 21:00:00	19.5	24	18	50576.8
202	1993-09-12 18:05:00	1993-09-12 19:30:00	1993-09-13 16:00:00	4.89956	21.7	3.2	1993-09-13 01:00:00	1993-09-13 05:00:00	1993-09-13 17:00:00	18.875	56	19	859087
203	1993-10-12 07:00:00	1993-10-12 07:30:00	1993-10-12 10:00:00	0.1	0.4	7	1993-10-12 16:00:00	1993-10-12 18:00:00	1993-10-12 22:00:00	6.925	7.8	7	9441.56
204	1993-10-14 11:00:00	1993-10-14 18:30:02	1993-10-14 20:00:00	0.1	0.8	3.5	1993-10-14 14:00:00	1993-10-14 15:00:00	1993-10-15 16:00:00	7.9375	9	5.575	143612
205	1993-10-15 18:00:00	1993-10-15 19:29:55	1993-10-15 20:00:00	0.199866	0.4	2.6	1993-10-15 18:00:00	1993-10-16 07:00:00	1993-10-17 05:00:00	7.1125	8.4	7.3	118998
206	1993-10-16 15:00:00	1993-10-17 06:29:59	1993-10-18 17:00:00	0.599988	15.1	2.6	1993-10-16 20:00:00	1993-10-18 03:00:00	1993-10-18 19:00:00	8.8125	28	12	775246
207	1993-10-25 17:00:00	1993-10-25 17:30:00	1993-10-25 20:00:00	0.1	0.4	1.5	1993-10-25 17:00:00	1993-10-25 17:15:00	1993-10-26 16:00:00	9.3	9.3	4.55	172084
208	1993-11-13 15:00:00	1993-11-13 18:29:57	1993-11-14 13:00:00	0.499932	5	7.7	1993-11-13 16:00:00	1993-11-14 15:00:00	1993-11-14 23:00:00	7.6125	12	7.5	137077
209	1993-11-18 14:00:00	1993-11-18 15:43:26	1993-11-18 20:00:00	0.3	1.5	5	1993-11-18 14:00:00	1993-11-19 01:00:00	1993-11-19 13:00:00	15	20	12	198039
210	1994-01-02 03:00:00	1994-01-02 03:30:00	1994-01-02 05:00:00	0.1	0.3	0	1994-01-02 03:15:00	1994-01-02 04:00:00	1994-01-02 06:00:00	4.9	5.1	4.9	1417.5
211	1994-01-03 16:00:00	1994-01-03 16:30:00	1994-01-03 18:00:00	0.1	0.3	0.3	1994-01-03 18:00:00	1994-01-04 07:00:00	1994-01-04 11:00:00	39.375	50	37.5	300894
212	1994-01-05 10:00:00	1994-01-05 12:58:59	1994-01-05 15:00:00	0.2	0.9	0.6	1994-01-05 10:00:00	1994-01-06 13:00:00	1994-01-06 23:00:00	42.25	48	26.875	690457
213	1994-01-06 18:00:00	1994-01-06 18:30:00	1994-01-06 20:00:00	0.1	0.3	1.5	1994-01-07	1994-01-07 12:00:00	1994-01-07 21:00:00	38	64	33.125	807979
214	1994-01-16 03:30:00	1994-01-16 04:29:57	1994-01-16 05:00:00	0.999464	1.2	0	1994-01-16 03:45:00	1994-01-16 03:45:00	1994-01-16 08:00:00	32	32	30	2329.41
215	1994-01-25 23:30:00	1994-01-26 03:30:01	1994-01-27	0.6	7.6	0	1994-01-26 01:00:00	1994-01-27 16:00:00	1994-01-28 04:00:00	24.75	28	26.375	148395
216	1994-02-28 12:00:00	1994-02-28 16:12:38	1994-02-28 19:00:00	0.3	1.5	5.1	1994-02-28 14:00:00	1994-02-28 16:00:00	1994-02-28 23:00:00	41.5	52	41	171662
217	1994-03-05 19:00:00	1994-03-05 20:43:26	1994-03-06	0.3	1.2	1.5	1994-03-06 15:00:00	1994-03-06 16:00:00	1994-03-07 13:00:00	40.75	42	41	113065
218	1994-03-06 14:00:00	1994-03-06 14:30:00	1994-03-06 17:00:00	0.1	0.4	1.2	1994-03-06 15:00:00	1994-03-07 06:00:00	1994-03-07 08:00:00	40.75	44	43	22582.7
219	1994-03-07 16:00:00	1994-03-07 16:30:00	1994-03-07 23:00:00	0.4	1.1	1.6	1994-03-08 03:00:00	1994-03-08 07:00:00	1994-03-08 09:00:00	35	54	35	134100
220	1994-03-08 11:00:00	1994-03-08 13:58:59	1994-03-08 19:00:00	0.2	1.3	2.7	1994-03-08 11:15:00	1994-03-08 11:15:00	1994-03-09 03:00:00	35	35	28	124650
221	1994-03-24 12:00:00	1994-03-24 19:10:05	1994-03-25 05:00:00	0.3	2.3	3	1994-03-24 13:00:00	1994-03-25 01:00:00	1994-03-25 07:00:00	26.375	31	29	44264.1
222	1994-04-24 15:00:00	1994-04-24 17:30:02	1994-04-24 20:00:00	0.999867	3.1	0	1994-04-24 15:00:00	1994-04-25 02:00:00	1994-04-25 12:00:00	31	287	37.875	6.46905e+06
223	1994-04-29 11:00:00	1994-04-29 15:23:52	1994-04-29 23:00:00	0.3	2.1	16.7	1994-04-29 11:15:00	1994-04-29 11:15:00	1994-04-30 08:00:00	12	11.175	5.8	5047.59
224	1994-05-01 11:00:00	1994-05-01 16:20:34	1994-05-01 20:00:00	0.2	1.5	8.2	1994-05-01 11:00:00	1994-05-02 08:00:00	1994-05-02 15:00:00	2.9	13	3.2	76745.9
225	1994-05-02 08:00:00	1994-05-02 08:30:00	1994-05-02 17:00:00	0.1	1	8	1994-05-02 08:00:00	1994-05-03 17:00:00	1994-05-03 22:00:00	10.1125	14	13	54200.8
226	1994-05-04 06:00:00	1994-05-04 15:55:13	1994-05-05	0.4	2.4	6	1994-05-04 14:00:00	1994-05-04 16:00:00	1994-05-05 01:00:00	19.75	42	16	447336
227	1994-05-06 10:00:00	1994-05-06 11:53:03	1994-05-06 16:00:00	0.4	1.6	6.3	1994-05-06 17:00:00	1994-05-07 14:00:00	1994-05-08 10:00:00	70.875	262	179.125	1.74333e+07
228	1994-05-07 15:20:00	1994-05-07 19:30:02	1994-05-07 22:00:00	0.699869	2.9	6.4	1994-05-07 16:00:00	1994-05-08 13:00:00	1994-05-08 15:00:00	257.625	432	241.25	1.30188e+06
229	1994-05-13 08:00:00	1994-05-13 15:30:02	1994-05-13 19:00:00	1.2	6.5	6.5	1994-05-13 08:00:00	1994-05-13 10:00:00	1994-05-14 03:00:00	344.625	393	169	850651
230	1994-05-18 16:30:00	1994-05-18 17:29:57	1994-05-18 18:00:00	0.499799	0.7	6.5	1994-05-19 04:00:00	1994-05-19 10:00:00	1994-05-20 02:00:00	95.375	310	103.625	7.90147e+06
231	1994-05-27 14:00:00	1994-05-27 14:30:00	1994-05-27 18:00:00	0.1	0.5	11.1	1994-05-28 02:00:00	1994-05-28 10:00:00	1994-05-28 23:00:00	236.625	454	255.375	7.60177e+06
232	1994-05-31 13:20:00	1994-05-31 16:29:55	1994-05-31 22:00:00	1.09962	5.7	1.6	1994-05-31 23:00:00	1994-06-01 12:00:00	1994-06-02	215.875	1390	690.875	4.10161e+07
233	1994-06-18 10:00:00	1994-06-18 11:30:01	1994-06-18 15:00:00	0.499901	1.3	0	1994-06-18 10:00:00	1994-06-19 14:00:00	1994-06-19 19:00:00	235.5	273	242.125	1.3506e+06
234	1994-06-20 05:20:00	1994-06-20 12:29:59	1994-06-20 18:00:00	0.699997	4.6	14.3	1994-06-20 06:00:00	1994-06-20 16:00:00	1994-06-21 02:00:00	221	652	260.625	6.7942e+06
235	1994-06-21 09:15:00	1994-06-21 14:29:58	1994-06-21 19:00:00	1.39969	4.9	19	1994-06-21 10:00:00	1994-06-21 12:00:00	1994-06-21 21:00:00	440	445	228	330218
236	1994-06-22 04:00:00	1994-06-22 07:25:08	1994-06-22 08:00:00	0.4	1.3	23.9	1994-06-22 08:00:00	1994-06-22 14:00:00	1994-06-22 18:00:00	161.125	202	172	542590
237	1994-07-02 16:00:00	1994-07-02 16:30:00	1994-07-02 19:00:00	0.6	1.3	0	1994-07-02 16:00:00	1994-07-03 15:00:00	1994-07-03 17:00:00	156.25	187	162.25	476064
238	1994-07-03 10:30:00	1994-07-03 19:30:01	1994-07-03 22:00:00	0.79997	2.8	1.3	1994-07-03 11:00:00	1994-07-04 14:00:00	1994-07-04 23:00:00	166	258	147.125	2.41569e+06
239	1994-07-10 14:00:00	1994-07-10 14:30:00	1994-07-10 16:00:00	0.1	0.3	0	1994-07-11 01:00:00	1994-07-11 15:00:00	1994-07-12 11:00:00	7.4875	34	7	609842
240	1994-07-13 14:00:00	1994-07-13 14:30:00	1994-07-13 16:00:00	0.1	0.3	1.4	1994-07-13 18:00:00	1994-07-14 11:00:00	1994-07-15 14:00:00	86	108	89	6.48233e+06
241	1994-07-14 13:00:00	1994-07-14 14:30:01	1994-07-14 16:00:00	0.199967	0.5	1.7	1994-07-14 17:00:00	1994-07-15 04:00:00	1994-07-15 14:00:00	101	251	89	5496750
242	1994-07-22 18:30:00	1994-07-22 19:00:00	1994-07-22 21:00:00	0.2	0.6	0	1994-07-22 23:00:00	1994-07-23 21:00:00	1994-07-25 14:00:00	20.25	104	30.125	1.5357e+07
243	1994-07-23 09:00:00	1994-07-23 16:30:02	1994-07-23 19:00:00	1.39968	5.6	0.6	1994-07-23 09:00:00	1994-07-24 01:00:00	1994-07-24 10:00:00	50.375	406	92.125	4.01894e+06
244	1994-08-01 07:00:00	1994-08-01 08:30:37	1994-08-01 20:00:00	0.7	4.9	6.8	1994-08-01 10:00:00	1994-08-01 14:00:00	1994-08-02 01:00:00	10.125	92	30.375	879086
245	1994-08-02 09:00:00	1994-08-02 11:35:39	1994-08-02 20:00:00	0.5	3.1	11.7	1994-08-02 09:00:00	1994-08-02 14:00:00	1994-08-02 23:00:00	68	88	64	507857
246	1994-08-03 08:30:00	1994-08-03 16:09:15	1994-08-03 18:00:00	0.2	1.9	14.8	1994-08-03 09:00:00	1994-08-03 10:00:00	1994-08-04 04:00:00	69	74	42.125	109836
247	1994-08-10 12:20:00	1994-08-10 14:29:59	1994-08-11	0.499999	2.1	0.2	1994-08-10 13:00:00	1994-08-11 03:00:00	1994-08-11 21:00:00	43.75	611	159.375	1.44099e+07
248	1994-08-12 10:30:00	1994-08-12 16:29:57	1994-08-12 19:00:00	0.999724	3.9	2.6	1994-08-12 14:00:00	1994-08-13 15:00:00	1994-08-13 18:00:00	75.75	154	72.75	492445
249	1994-08-13 08:30:00	1994-08-13 12:30:01	1994-08-13 17:00:00	1.39993	6.2	6.5	1994-08-13 10:00:00	1994-08-14 13:00:00	1994-08-14 17:00:00	47.5	221	61	3.78662e+06
250	1994-08-19 03:00:00	1994-08-19 05:30:02	1994-08-19 16:00:00	0.799538	3.7	6.3	1994-08-19 04:00:00	1994-08-19 16:00:00	1994-08-19 22:00:00	42.25	92	47.75	596319
251	1994-08-22 12:00:00	1994-08-22 12:30:00	1994-08-22 20:00:00	0.2	0.9	5.3	1994-08-22 12:00:00	1994-08-22 15:00:00	1994-08-22 23:00:00	51	53	41.625	58983.2
252	1994-08-31 11:30:00	1994-08-31 13:07:26	1994-08-31 18:00:00	0.4	1.9	8.2	1994-08-31 13:00:00	1994-08-31 17:00:00	1994-08-31 20:00:00	20	26	13.375	89140.2
253	1994-09-01 11:00:00	1994-09-01 18:20:13	1994-09-01 21:00:00	0.2	1.3	10.1	1994-09-01 14:00:00	1994-09-01 15:00:00	1994-09-01 23:00:00	14.375	20	8.625	12880
254	1995-05-20 08:30:00	1995-05-20 10:29:58	1995-05-20 17:00:00	0.699932	3.3	37.9	1995-05-20 09:00:00	1995-05-20 18:30:00	1995-05-21 03:00:00	5.325	47	11	378270
255	1995-05-21 12:00:00	1995-05-21 13:30:01	1995-05-21 15:00:00	0.399934	0.9	40.9	1995-05-21 18:00:00	1995-05-21 19:00:00	1995-05-21 22:00:00	30.6375	65	14	130243
256	1995-06-04 08:00:00	1995-06-04 14:53:03	1995-06-04 19:00:00	0.4	3.2	9.4	1995-06-04 08:00:00	1995-06-04 13:00:00	1995-06-04 20:00:00	1778.75	1880	1760	1.52149e+06
257	1995-06-06 18:07:30	1995-06-06 19:29:54	1995-06-06 20:00:00	1.59873	2.4	11.2	1995-06-06 23:00:00	1995-06-07 07:00:00	1995-06-07 13:00:00	1740	2090	1867.5	7.63365e+06
258	1995-06-07 12:30:00	1995-06-09 03:30:00	1995-06-09 11:00:00	1.69995	22.7	13.6	1995-06-07 14:00:00	1995-06-08 09:00:00	1995-06-09 15:00:00	1878.75	2360	2080	1.4817e+07
259	1995-06-10 09:30:00	1995-06-10 10:29:57	1995-06-10 17:00:00	0.299933	1.4	25.1	1995-06-10 09:45:00	1995-06-10 09:45:00	1995-06-10 23:00:00	1800	1760	1681.25	267570
260	1995-06-27 13:00:00	1995-06-27 17:38:35	1995-06-27 20:00:00	0.642636	1.9	7.1	1995-06-27 16:00:00	1995-06-28 07:30:00	1995-06-28 10:00:00	1325	1530	1428.75	1147250
261	1995-08-20 13:30:00	1995-08-20 16:29:59	1995-08-20 17:00:00	0.199999	0.6	0	1995-08-20 14:00:00	1995-08-20 22:00:00	1995-08-21 17:00:00	18.125	106	29.5	2.13911e+06
262	1995-08-23 06:00:00	1995-08-23 11:29:59	1995-08-23 19:00:00	0.399998	2.5	4.7	1995-08-23 06:00:00	1995-08-23 22:30:00	1995-08-24 04:00:00	108.125	146	106.875	569235
263	1995-08-24 10:15:00	1995-08-24 11:42:12	1995-08-24 15:00:00	0.5	1.8	7.2	1995-08-24 14:00:00	1995-08-25 08:00:00	1995-08-25 21:00:00	37.375	86	23.5	2.83698e+06
264	1995-09-06 15:00:00	1995-09-06 15:30:00	1995-09-06 17:00:00	0.2	0.5	4.2	1995-09-06 15:00:00	1995-09-07	1995-09-07 12:00:00	33.625	61	31.875	993075
265	1995-09-07 12:10:00	1995-09-07 14:30:01	1995-09-07 18:00:00	1	4.7	4.7	1995-09-07 13:00:00	1995-09-08 17:00:00	1995-09-09 13:00:00	32.5	282	38.25	1.04342e+07
266	1995-10-31 12:00:00	1995-11-01 02:36:05	1995-11-02 01:00:00	0.5	9	1.5	1995-10-31 20:00:00	1995-11-01 18:00:00	1995-11-02 10:00:00	1.11875	18	1.13125	243320
267	1995-12-07 18:00:00	1995-12-07 18:30:00	1995-12-07 20:00:00	0.2	0.4	2.9	1995-12-07 18:15:00	1995-12-07 18:15:00	1995-12-07 21:00:00	0.85	0.85	0.83	11.8636
268	1995-12-17 07:00:00	1995-12-17 07:30:00	1995-12-17 11:00:00	0.1	0.5	0.6	1995-12-17 07:00:00	1995-12-17 10:00:00	1995-12-17 12:00:00	16.625	18	16.375	4511.25
269	1995-12-31 02:00:00	1995-12-31 09:30:02	1996-01-01 01:00:00	0.2	2.9	0.1	1995-12-31 07:00:00	1996-01-01 15:00:00	1996-01-02 03:00:00	35.375	44	9.5	2.56773e+06
270	1996-01-01 12:00:00	1996-01-01 14:58:59	1996-01-01 18:00:00	0.2	1.1	3	1996-01-01 12:00:00	1996-01-02 14:00:00	1996-01-02 17:00:00	40.75	60	42.25	387043
271	1996-01-10 10:00:00	1996-01-10 14:00:19	1996-01-10 17:00:00	0.2	0.8	0.7	1996-01-10 10:00:00	1996-01-10 21:00:00	1996-01-11 08:00:00	46.375	52	22.25	978153
272	1996-01-17 10:00:00	1996-01-17 10:30:00	1996-01-17 16:00:00	0.2	0.8	0	1996-01-17 14:00:00	1996-01-18 11:00:00	1996-01-18 23:00:00	48	74	20	1321200
273	1996-01-22 08:00:00	1996-01-22 09:30:07	1996-01-22 23:00:00	0.2	1.9	0.8	1996-01-22 08:00:00	1996-01-23 19:00:00	1996-01-24 01:00:00	65.375	79	60	527384
274	1996-01-28 07:00:00	1996-01-28 07:30:00	1996-01-28 13:00:00	0.1	0.7	12.1	1996-01-28 07:00:00	1996-01-28 14:00:00	1996-01-28 16:00:00	54.375	76	70	52518.8
275	1996-01-29 20:00:00	1996-01-30 01:29:59	1996-01-30 22:00:00	0.799998	8	10.6	1996-01-29 20:15:00	1996-01-29 20:15:00	1996-01-31 02:00:00	74	72.5	32	617254
276	1996-01-31 14:00:00	1996-01-31 15:30:01	1996-01-31 22:00:00	0.199967	1	11.2	1996-01-31 14:00:00	1996-02-01 19:00:00	1996-02-02 04:00:00	48.625	89	65.375	1.32805e+06
277	1996-02-18 01:00:00	1996-02-18 01:30:00	1996-02-18 04:00:00	0.2	0.5	0	1996-02-18 01:00:00	1996-02-18 02:00:00	1996-02-18 07:00:00	83.375	84	76	26718.8
278	1996-02-19 17:20:00	1996-02-19 19:29:59	1996-02-19 22:00:00	0.599999	1.7	0.5	1996-02-19 22:00:00	1996-02-20 18:00:00	1996-02-23 19:00:00	72.75	80	67.375	3.60773e+06
279	1996-02-20 11:00:00	1996-02-20 22:44:38	1996-02-21 14:00:00	0.2	3	2.2	1996-02-20 11:00:00	1996-02-21 06:00:00	1996-02-21 15:00:00	78	86	83	78010.7
280	1996-02-21 19:00:00	1996-02-22 01:49:57	1996-02-22 03:00:00	0.233294	1	5.2	1996-02-21 23:00:00	1996-02-22 04:00:00	1996-02-22 20:00:00	82.375	84	82	108502
281	1996-02-22 13:00:00	1996-02-22 15:28:50	1996-02-22 21:00:00	0.2	1.3	6.2	1996-02-22 13:15:00	1996-02-22 13:15:00	1996-02-23 02:00:00	84	84	82.375	4365.44
282	1996-02-26 12:00:00	1996-02-26 12:30:00	1996-02-26 17:00:00	0.4	1.5	2.3	1996-02-26 12:15:00	1996-02-26 12:15:00	1996-02-27	90	89.25	60.25	667.819
283	1996-03-12 05:30:00	1996-03-12 06:00:00	1996-03-12 07:00:00	0.15	0.3	0.4	1996-03-12 08:00:00	1996-03-13 06:00:00	1996-03-13 17:00:00	76.75	83	67	650746
284	1996-03-13 08:00:00	1996-03-13 19:30:01	1996-03-14 05:00:00	2.29994	15.8	0.8	1996-03-13 18:00:00	1996-03-14 11:00:00	1996-03-14 20:00:00	73.375	117	90.75	1.80129e+06
285	1996-03-16 17:00:00	1996-03-17 07:29:58	1996-03-17 16:00:00	0.299922	3.1	17.5	1996-03-16 20:00:00	1996-03-17	1996-03-17 19:00:00	67.375	82	72	532001
286	1996-03-18 05:00:00	1996-03-18 05:30:00	1996-03-18 08:00:00	0.6	1.2	20.6	1996-03-18 06:00:00	1996-03-19 05:00:00	1996-03-19 20:00:00	72.75	92	87	529762
287	1996-03-18 14:00:00	1996-03-18 14:30:00	1996-03-18 17:00:00	0.1	0.4	21.3	1996-03-18 18:00:00	1996-03-19 10:00:00	1996-03-19 20:00:00	70.375	95	87	798557
288	1996-03-23 17:00:00	1996-03-23 21:29:58	1996-03-24 18:00:00	2.09943	15.6	2	1996-03-23 18:00:00	1996-03-24 12:00:00	1996-03-25 07:00:00	63.75	84	55.375	1.77632e+06
289	1996-04-04 11:00:00	1996-04-04 21:52:20	1996-04-05 01:00:00	0.4	3.5	2.6	1996-04-04 13:00:00	1996-04-04 23:00:00	1996-04-05 15:00:00	38.375	55	50.75	531495
290	1996-04-12 14:00:00	1996-04-12 19:29:59	1996-04-12 23:00:00	0.299998	1.5	8.6	1996-04-12 15:00:00	1996-04-13 22:30:00	1996-04-14 08:00:00	110	221	113.5	3.64138e+06
291	1996-04-13 08:00:00	1996-04-13 12:30:04	1996-04-14 03:00:00	0.5	4.2	10.1	1996-04-13 09:00:00	1996-04-14 00:15:00	1996-04-14 08:00:00	101.5	223	113.5	3.95062e+06
292	1996-05-19 02:00:00	1996-05-19 03:30:01	1996-05-19 05:00:00	0.299934	0.6	0.1	1996-05-19 02:00:00	1996-05-19 06:15:00	1996-05-19 08:00:00	727.25	987	799.25	2.31716e+06
293	1996-05-19 16:00:00	1996-05-19 19:40:04	1996-05-20 03:00:00	0.583201	2.7	0.7	1996-05-19 16:15:00	1996-05-19 16:30:00	1996-05-20 21:00:00	557	545	103.5	6.57112e+06
294	1996-05-24 05:30:00	1996-05-25 17:30:03	1996-05-27 01:00:00	2.29948	43.7	21.5	1996-05-25 01:00:00	1996-05-26 12:15:00	1996-05-27 02:00:00	866.75	1250	925.5	2.36709e+07
295	1996-05-27 07:00:00	1996-05-27 07:30:00	1996-05-27 20:00:00	0.4	2.3	61.6	1996-05-27 07:15:00	1996-05-27 07:45:00	1996-05-27 22:00:00	829	829	566	208075
296	1996-05-28 06:00:00	1996-05-28 15:29:58	1996-05-28 17:00:00	0.799778	2.2	63.9	1996-05-28 06:00:00	1996-05-28 10:30:00	1996-05-28 19:00:00	545.5	589	475.5	391102
297	1996-06-12 12:30:00	1996-06-12 16:29:55	1996-06-12 17:00:00	0.802641	1.2	6.2	1996-06-12 13:00:00	1996-06-13 06:15:00	1996-06-13 09:00:00	1550	1750	1625	1506375
298	1996-06-14 13:15:00	1996-06-14 15:30:00	1996-06-14 17:00:00	1.19989	2.9	7	1996-06-14 15:00:00	1996-06-15 16:15:00	1996-06-16 23:00:00	1295	2110	1490	1.07143e+08
299	1996-06-15 02:30:00	1996-06-15 07:30:02	1996-06-15 15:00:00	1.69974	11.8	9.9	1996-06-15 04:00:00	1996-06-16 01:15:00	1996-06-16 23:00:00	1695	2670	1490	6.66963e+07
300	1996-06-20 16:03:19	1996-06-20 16:33:19	1996-06-20 19:00:00	1.80513	3.3	14.3	1996-06-21 01:00:00	1996-06-21 18:30:00	1996-06-24 11:00:00	600	786	722.5	8.18872e+07
301	1996-06-21 11:20:00	1996-06-21 12:29:58	1996-06-21 21:00:00	6.5979	14	5.8	1996-06-21 18:00:00	1996-06-22 10:30:00	1996-06-22 18:00:00	740	1410	1057.5	1.37566e+07
302	1996-08-09 11:10:00	1996-08-09 11:40:00	1996-08-09 13:00:00	0.516667	0.7	2.1	1996-08-09 15:00:00	1996-08-09 20:00:00	1996-08-10 22:00:00	46.75	95	49.5	2.04531e+06
303	1996-08-12 06:00:00	1996-08-13 01:57:43	1996-08-13 05:00:00	0.1	2.4	1.1	1996-08-12 08:00:00	1996-08-13 14:00:00	1996-08-13 16:00:00	44.5	60	40	443306
304	1996-08-14 12:00:00	1996-08-14 15:29:57	1996-08-14 16:00:00	1.30253	2	3.1	1996-08-14 17:00:00	1996-08-15 04:30:00	1996-08-15 11:00:00	32	46	32	329400
305	1996-08-15 06:00:00	1996-08-15 17:29:55	1996-08-15 18:00:00	0.31062	1.7	5.1	1996-08-15 12:00:00	1996-08-16 14:30:00	1996-08-17 19:00:00	32.25	180	4.95	1.20975e+07
306	1996-08-17 06:00:00	1996-08-17 16:10:45	1996-08-18 05:00:00	0.1	2	6.5	1996-08-17 06:00:00	1996-08-17 06:15:00	1996-08-18 06:00:00	141	142	4.85	7208.44
307	1996-08-18 14:00:00	1996-08-18 22:29:57	1996-08-19 01:00:00	0.29993	1.2	6.1	1996-08-18 14:00:00	1996-08-18 21:30:00	1996-08-19 02:00:00	6.5	137	26.25	752136
308	1996-08-19 11:30:00	1996-08-19 13:29:58	1996-08-19 16:00:00	0.299966	0.8	7.3	1996-08-19 12:00:00	1996-08-19 12:45:00	1996-08-19 18:00:00	60	62	44	11100
309	1996-08-21 06:00:00	1996-08-21 06:30:00	1996-08-21 08:00:00	0.1	0.3	5.1	1996-08-21 06:00:00	1996-08-21 09:00:00	1996-08-22 08:00:00	54.25	70	56.25	686960
310	1996-08-27 10:00:00	1996-08-27 10:30:00	1996-08-27 15:00:00	0.3	0.9	0.9	1996-08-27 11:00:00	1996-08-28 07:00:00	1996-08-30 04:00:00	19	68	25.5	5.21449e+06
311	1996-08-28 12:30:00	1996-08-28 15:29:59	1996-08-28 17:00:00	1.69998	2.2	1.6	1996-08-28 13:00:00	1996-08-29 15:00:00	1996-08-29 17:00:00	59	61	49	59625
312	1996-09-05 13:00:00	1996-09-05 18:30:05	1996-09-06 03:00:00	0.2	1.5	0.3	1996-09-05 16:00:00	1996-09-05 17:15:00	1996-09-06 04:00:00	16.75	45	14.5	499711
313	1996-09-06 09:30:00	1996-09-06 13:59:58	1996-09-06 16:00:00	0.149988	0.7	1.8	1996-09-06 10:00:00	1996-09-06 12:45:00	1996-09-06 17:00:00	13.25	15	9.275	35092.8
314	1996-09-12 17:00:00	1996-09-12 18:30:07	1996-09-12 23:00:00	0.2	0.9	0	1996-09-12 17:15:00	1996-09-12 17:15:00	1996-09-13 09:00:00	66	62	48.75	0
315	1996-09-13 04:00:00	1996-09-13 11:29:56	1996-09-13 20:00:00	0.399897	2.4	0.9	1996-09-13 04:00:00	1996-09-14 15:00:00	1996-09-16 20:00:00	46	86	33.75	6.23128e+06
316	1996-09-14 14:00:00	1996-09-14 21:30:50	1996-09-15 05:00:00	0.2	1.9	3.3	1996-09-14 14:00:00	1996-09-15 00:45:00	1996-09-15 06:00:00	84	93	80	142931
317	1996-10-29 07:00:00	1996-10-29 08:19:53	1996-10-29 11:00:00	0.3	1	8.7	1996-10-29 08:00:00	1996-10-29 21:45:00	1996-10-31 05:00:00	37.25	53	41	1.11709e+06
318	1996-11-15 00:20:00	1996-11-15 04:30:02	1996-11-16 16:00:00	1.0998	14.6	0	1996-11-15 01:00:00	1996-11-15 15:30:00	1996-11-17 04:00:00	65.5	84	37	3134925
319	1996-11-17 17:00:00	1996-11-17 17:30:00	1996-11-17 19:00:00	0.1	0.3	14.6	1996-11-18	1996-11-18 18:45:00	1996-11-21 03:00:00	41.5	52	48.25	4.45693e+06
320	1996-11-18 06:00:00	1996-11-18 06:30:00	1996-11-18 08:00:00	0.1	0.3	15	1996-11-18 08:00:00	1996-11-19 07:45:00	1996-11-20 08:00:00	38	84	58	3.28941e+06
321	1996-12-05 13:00:00	1996-12-05 19:28:36	1996-12-05 22:00:00	0.2	0.9	0.3	1996-12-05 13:00:00	1996-12-06 22:00:00	1996-12-07 09:00:00	29.75	48	29.5	980760
322	1996-12-16 04:00:00	1996-12-16 11:30:50	1996-12-16 20:00:00	0.2	1.8	2.9	1996-12-16 09:00:00	1996-12-16 10:00:00	1996-12-16 21:00:00	19.55	48	5.4	570239
323	1997-02-22 19:00:00	1997-02-23 04:29:58	1997-02-23 10:00:00	0.299963	2.7	0.5	1997-02-22 21:00:00	1997-02-23 02:00:00	1997-02-23 12:00:00	59.25	116	76.75	824400
324	1997-03-24 10:30:00	1997-03-24 12:29:58	1997-03-24 17:00:00	0.599898	1.9	0.8	1997-03-24 11:00:00	1997-03-24 15:00:00	1997-03-24 19:00:00	48.75	57	45.75	81056.2
325	1997-05-21 11:00:00	1997-05-21 13:30:02	1997-05-22 19:00:00	3.19841	18.4	6.7	1997-05-21 21:00:00	1997-05-23 06:30:00	1997-05-23 11:00:00	540.25	1080	794.25	1.20276e+07
326	1997-05-26 14:00:00	1997-05-26 16:28:50	1997-05-26 19:00:00	0.2	1	26.7	1997-05-26 16:00:00	1997-05-27 13:15:00	1997-05-27 21:00:00	219.5	253	189.5	1.3559e+06
327	1997-05-27 12:00:00	1997-05-27 16:29:58	1997-05-28	0.69986	2.8	5.4	1997-05-27 13:00:00	1997-05-28 08:15:00	1997-05-28 11:00:00	247.75	260	192.5	873839
328	1997-05-28 10:00:00	1997-05-28 12:30:02	1997-05-30 03:00:00	0.599736	7.9	8.2	1997-05-28 12:00:00	1997-05-30 10:15:00	1997-05-30 13:00:00	194	459	327.75	3.00212e+06
329	1997-05-30 10:00:00	1997-05-30 10:30:00	1997-05-30 19:00:00	0.2	0.9	14	1997-05-30 10:00:00	1997-05-31 06:30:00	1997-05-31 08:00:00	456.25	613	480	765358
330	1997-05-31 15:12:00	1997-05-31 16:29:59	1997-05-31 18:00:00	0.599993	1.2	14.8	1997-05-31 20:00:00	1997-06-01 09:30:00	1997-06-01 22:00:00	391.5	1220	918.25	2.03694e+07
331	1997-06-01 03:30:00	1997-06-01 04:00:00	1997-06-01 05:00:00	0.15	0.3	13.8	1997-06-01 04:00:00	1997-06-02 04:45:00	1997-06-02 20:00:00	799	1630	1400	3.15323e+07
332	1997-06-01 14:04:36	1997-06-01 14:34:36	1997-06-01 16:00:00	1.33833	1.9	13.1	1997-06-01 23:00:00	1997-06-02 10:15:00	1997-06-02 15:00:00	959.25	1880	1515	1.76734e+07
333	1997-06-02 05:00:00	1997-06-02 21:30:00	1997-06-02 23:00:00	1.09978	5	15	1997-06-02 05:00:00	1997-06-03 08:45:00	1997-06-03 23:00:00	1615	2740	1945	4.15377e+07
334	1997-06-12 11:08:34	1997-06-12 17:31:46	1997-06-12 21:00:00	3.3758	8.6	36.5	1997-06-12 11:23:34	1997-06-12 11:30:00	1997-06-12 23:00:00	2200	2280	1922.5	635380
335	1997-06-13 10:00:00	1997-06-13 16:11:52	1997-06-13 19:00:00	0.5	2.9	29.3	1997-06-13 19:00:00	1997-06-14 07:00:00	1997-06-14 13:00:00	1890	2220	2042.5	3205000
336	1997-07-26 14:30:00	1997-07-26 18:29:55	1997-07-26 19:00:00	1.59811	2	5.5	1997-07-26 16:00:00	1997-07-27 09:30:00	1997-07-27 12:00:00	97	124	69.25	767787
337	1997-07-28 12:00:00	1997-07-28 19:30:02	1997-07-29 02:00:00	1.59974	12.5	13.7	1997-07-28 12:00:00	1997-07-28 23:15:00	1997-07-29 06:00:00	710	3000	892.25	2.91603e+07
338	1997-07-29 07:00:00	1997-07-29 18:36:37	1997-07-29 21:00:00	0.922112	2	26.2	1997-07-29 07:00:00	1997-07-29 07:15:00	1997-07-30 06:00:00	954.75	971	260	50539.4
339	1997-07-31 07:00:00	1997-07-31 12:29:59	1997-07-31 16:00:00	1.09999	3	38.3	1997-07-31 07:00:00	1997-07-31 09:15:00	1997-07-31 22:00:00	402.5	557	138.5	3862350
340	1997-08-01 10:07:30	1997-08-01 10:37:30	1997-08-01 16:00:00	0.7625	1.4	41.3	1997-08-01 10:22:30	1997-08-01 11:00:00	1997-08-01 17:00:00	64	61	25.5	328.846
341	1997-08-03 11:00:00	1997-08-03 15:42:00	1997-08-03 17:00:00	0.439985	0.9	34.5	1997-08-03 13:00:00	1997-08-04 09:30:00	1997-08-05 05:00:00	212	324	218	7.18325e+06
342	1997-08-04 16:00:00	1997-08-05 10:29:57	1997-08-06 16:00:00	1.99978	29.7	20.9	1997-08-04 16:00:00	1997-08-06 09:15:00	1997-08-07 10:00:00	286.5	936	161	44164275
343	1997-08-11 10:30:00	1997-08-11 16:13:37	1997-08-11 20:00:00	0.6	3.5	20.2	1997-08-11 10:45:00	1997-08-11 11:00:00	1997-08-12 06:00:00	608	617	517	1145250
344	1997-08-16 15:10:00	1997-08-16 17:30:01	1997-08-16 19:00:00	1.39967	3.4	4.6	1997-08-16 16:00:00	1997-08-17 16:00:00	1997-08-19 15:00:00	407.25	626	350.25	3.71943e+07
345	1997-08-28 12:30:00	1997-08-28 14:29:58	1997-08-28 16:00:00	0.399898	0.8	2.7	1997-08-28 12:45:00	1997-08-28 13:00:00	1997-08-28 17:00:00	87	88	53.25	2686.76
346	1997-08-31 17:20:00	1997-08-31 19:30:05	1997-08-31 23:00:00	0.998582	1.9	1.6	1997-08-31 17:35:00	1997-08-31 17:45:00	1997-09-01	281	269	236.5	2223
347	1997-09-01 13:00:00	1997-09-01 13:30:00	1997-09-01 17:00:00	0.2	0.5	3.4	1997-09-01 13:00:00	1997-09-02 13:30:00	1997-09-03 12:00:00	207	423	62.75	2.63946e+07
348	1997-09-03 12:15:00	1997-09-03 18:29:59	1997-09-03 23:00:00	1.19981	4.1	4.1	1997-09-03 13:00:00	1997-09-04 17:45:00	1997-09-06 23:00:00	74.75	260	107.25	4.17969e+07
349	1997-09-04 11:15:00	1997-09-04 11:45:00	1997-09-04 17:00:00	0.325	1.5	6.9	1997-09-04 13:00:00	1997-09-05 17:00:00	1997-09-06 15:00:00	178	327	166.5	2.1901e+07
350	1997-09-06 12:00:00	1997-09-06 13:59:58	1997-09-06 15:00:00	0.149989	0.4	8.2	1997-09-06 16:00:00	1997-09-07 10:00:00	1997-09-07 12:00:00	173	231	106	571095
351	1997-09-07 13:00:00	1997-09-07 13:30:00	1997-09-07 20:00:00	2.7	3.4	6.2	1997-09-07 13:00:00	1997-09-08 17:00:00	1997-09-13 10:00:00	112.5	256	144	3.52799e+07
352	1997-10-11 21:00:00	1997-10-11 22:30:01	1997-10-12 14:00:00	0.299967	2.6	1.3	1997-10-11 23:00:00	1997-10-13 14:00:00	1997-10-14 10:00:00	171	214	166	3.19061e+06
353	1997-10-23 13:00:00	1997-10-23 20:29:56	1997-10-23 23:00:00	1.99989	8.1	0.5	1997-10-23 14:00:00	1997-10-24 22:45:00	1997-10-25 21:00:00	152.75	235	156.25	7.26247e+06
354	1997-10-24 04:00:00	1997-10-25 06:30:00	1997-10-25 15:00:00	1.6	34.7	8.6	1997-10-24 05:00:00	1997-10-25 01:30:00	1997-10-25 18:00:00	166	256	175.5	4.87158e+06
355	1997-10-31 18:00:00	1997-10-31 18:30:00	1997-11-01 02:00:00	0.3	0.8	1.2	1997-10-31 19:00:00	1997-11-01 14:30:00	1997-11-01 22:00:00	239.5	267	258	399538
356	1997-11-08 17:00:00	1997-11-09 03:30:05	1997-11-09 23:00:00	0.4	5.2	0	1997-11-08 18:00:00	1997-11-09 19:30:00	1997-11-10 02:00:00	228.5	244	231	424357
357	1997-11-10 22:00:00	1997-11-11 06:50:29	1997-11-11 21:00:00	0.2	2.6	5.2	1997-11-11	1997-11-12 01:45:00	1997-11-12 10:00:00	211	233	209.75	698370
358	1997-11-19 21:00:00	1997-11-19 22:30:01	1997-11-20 05:00:00	0.199967	1	0	1997-11-19 21:00:00	1997-11-20 19:00:00	1997-11-20 21:00:00	168.5	214	185	685477
359	1997-11-21 17:00:00	1997-11-21 17:30:00	1997-11-21 19:00:00	0.2	0.4	1	1997-11-21 17:00:00	1997-11-21 19:00:00	1997-11-21 23:00:00	191.5	242	180	256988
360	1998-01-03 02:30:00	1998-01-03 03:00:00	1998-01-03 04:00:00	0.15	0.3	0	1998-01-03 04:00:00	1998-01-03 07:45:00	1998-01-03 10:00:00	108	117	103.25	77475
361	1998-01-05 13:00:00	1998-01-05 19:29:55	1998-01-06 04:00:00	1.19948	8	0.3	1998-01-05 13:00:00	1998-01-06 00:30:00	1998-01-06 08:00:00	92	128	97	844591
362	1998-01-15 22:00:00	1998-01-15 23:43:26	1998-01-16 02:00:00	0.3	1.1	0.9	1998-01-16 04:00:00	1998-01-16 12:30:00	1998-01-16 15:00:00	84.75	96	76.25	155444
363	1998-01-17 08:00:00	1998-01-17 11:29:57	1998-01-17 17:00:00	0.499864	1.9	2.5	1998-01-17 08:00:00	1998-01-17 11:30:00	1998-01-17 20:00:00	72.75	88	70.75	167025
364	1998-02-24 17:00:00	1998-02-24 18:30:01	1998-02-25 05:00:00	0.499967	2.5	0.3	1998-02-24 19:00:00	1998-02-25 21:15:00	1998-02-26 02:00:00	76.75	93	88	105414
365	1998-03-03 23:00:00	1998-03-04 05:30:01	1998-03-04 07:00:00	0.399938	2.1	0.3	1998-03-03 23:00:00	1998-03-04 02:00:00	1998-03-04 08:00:00	95.5	104	94.5	73875
366	1998-03-06 12:00:00	1998-03-06 17:30:05	1998-03-06 19:00:00	0.2	1	2.7	1998-03-06 17:00:00	1998-03-07 03:00:00	1998-03-07 05:00:00	73.5	112	100.5	459225
367	1998-03-17 12:00:00	1998-03-17 21:29:58	1998-03-18 19:00:00	1.19996	18.9	0.2	1998-03-17 13:00:00	1998-03-18 03:15:00	1998-03-18 22:00:00	76	116	83.25	1.70799e+06
368	1998-03-28 01:00:00	1998-03-28 01:30:00	1998-03-28 06:00:00	0.1	0.3	0.9	1998-03-28 01:00:00	1998-03-28 13:00:00	1998-03-28 19:00:00	213.25	220	211.75	166912
369	1998-03-28 20:00:00	1998-03-29 02:42:32	1998-03-29 09:00:00	0.7	5.3	1.2	1998-03-28 20:00:00	1998-03-29 10:15:00	1998-03-29 23:00:00	212	224	111.75	2.62662e+06
370	1998-03-30 11:00:00	1998-03-30 16:10:27	1998-03-31 01:00:00	0.3	2.7	6.1	1998-03-30 11:00:00	1998-03-30 17:30:00	1998-03-31 04:00:00	163.5	205	192.5	676059
371	1998-04-02 10:00:00	1998-04-02 13:29:57	1998-04-02 22:00:00	2.09936	13.5	10.4	1998-04-02 10:00:00	1998-04-02 20:15:00	1998-04-03 13:00:00	188	247	192	2.48268e+06
372	1998-04-14 09:00:00	1998-04-14 15:33:55	1998-04-14 23:00:00	0.8	5.1	4.3	1998-04-14 09:00:00	1998-04-14 17:45:00	1998-04-15 07:00:00	41	360	49	3.28291e+06
373	1998-04-15 09:00:00	1998-04-15 14:35:54	1998-04-15 23:00:00	0.5	4.9	8.7	1998-04-15 11:00:00	1998-04-15 17:45:00	1998-04-16	49	54	48.25	79862
374	1998-04-17 12:00:00	1998-04-17 23:31:25	1998-04-18 07:00:00	0.3	3.2	13.7	1998-04-17 12:00:00	1998-04-18 10:45:00	1998-04-18 13:00:00	135	171	153.25	124423
375	1998-04-18 13:00:00	1998-04-18 13:30:00	1998-04-18 18:00:00	0.1	0.6	16.9	1998-04-18 14:00:00	1998-04-18 14:45:00	1998-04-18 23:00:00	154.5	159	140.75	81418.8
376	1998-04-19 16:00:00	1998-04-19 19:29:57	1998-04-20 02:00:00	0.299932	1.7	13.9	1998-04-19 19:00:00	1998-04-20 08:45:00	1998-04-20 13:00:00	311.5	370	292	2824500
377	1998-04-20 10:00:00	1998-04-20 14:29:58	1998-04-20 21:00:00	0.299965	1.8	10.5	1998-04-20 10:15:00	1998-04-20 10:15:00	1998-04-21 01:00:00	360	370	291.5	8244.92
378	1998-04-25 11:00:00	1998-04-26 06:30:04	1998-04-26 14:00:00	0.3	4.3	3.5	1998-04-25 11:00:00	1998-04-26 15:15:00	1998-04-26 17:00:00	314	351	335.25	313022
379	1998-05-04 13:00:00	1998-05-04 20:30:02	1998-05-05 01:00:00	0.999871	4.9	0.3	1998-05-04 13:00:00	1998-05-05 01:45:00	1998-05-05 07:00:00	233.75	644	495.5	1.37513e+07
380	1998-05-09 14:00:00	1998-05-09 22:29:57	1998-05-10 02:00:00	1.69909	3	18	1998-05-09 15:00:00	1998-05-10 08:45:00	1998-05-10 14:00:00	343.5	389	346.5	1.36064e+06
381	1998-05-10 16:00:00	1998-05-10 16:30:00	1998-05-10 19:00:00	0.2	0.6	16.1	1998-05-10 17:00:00	1998-05-11 18:45:00	1998-05-11 21:00:00	347.25	399	386	493771
382	1998-05-24 10:12:00	1998-05-24 10:42:00	1998-05-24 20:00:00	0.44	1.2	4	1998-05-24 13:00:00	1998-05-25 13:15:00	1998-05-25 23:00:00	149.75	286	193	2.3058e+06
383	1998-06-06 12:30:00	1998-06-06 16:29:55	1998-06-06 17:00:00	1.09865	1.7	16.7	1998-06-06 13:00:00	1998-06-07 06:30:00	1998-06-07 17:00:00	694.75	711	510	3.23295e+06
384	1998-06-09 13:05:27	1998-06-09 13:35:27	1998-06-09 15:00:00	1.0545	1.7	28.9	1998-06-09 14:00:00	1998-06-10 09:15:00	1998-06-10 11:00:00	826.5	856	823.25	143746
385	1998-06-14 12:20:00	1998-06-14 14:29:59	1998-06-14 21:00:00	0.799999	5.2	5.5	1998-06-14 14:00:00	1998-06-15 05:15:00	1998-06-15 18:00:00	508	626	395.75	8.42878e+06
386	1998-06-15 14:08:34	1998-06-15 14:38:34	1998-06-15 23:00:00	0.628556	1.7	9	1998-06-15 19:00:00	1998-06-16 04:45:00	1998-06-16 18:00:00	403	493	342	3.21066e+06
387	1998-07-06 09:00:00	1998-07-06 09:30:00	1998-07-06 11:00:00	0.1	0.3	2.1	1998-07-06 09:00:00	1998-07-07 10:45:00	1998-07-08 03:00:00	276.25	288	167	3.09275e+06
388	1998-07-08 06:00:00	1998-07-09 01:57:43	1998-07-09 05:00:00	0.1	2.4	1.9	1998-07-08 06:00:00	1998-07-10 05:00:00	1998-07-12	175.5	631	259	8.50148e+07
389	1998-07-09 17:00:00	1998-07-09 19:30:02	1998-07-09 22:00:00	0.599868	1.9	4.1	1998-07-09 19:00:00	1998-07-10 09:30:00	1998-07-10 20:00:00	570.5	682	501.75	4.64141e+06
390	1998-07-10 14:00:00	1998-07-10 15:30:01	1998-07-10 18:00:00	1.6999	5.7	5.8	1998-07-10 21:00:00	1998-07-11 07:15:00	1998-07-12	522	781	259	9.72033e+06
391	1998-07-28 10:00:00	1998-07-28 11:19:53	1998-07-29 04:00:00	0.3	1.9	14.1	1998-07-28 10:15:00	1998-07-30	1998-07-30 02:00:00	272	272	213	0
392	1998-07-29 09:30:00	1998-07-30 13:29:59	1998-07-30 19:00:00	1.39991	12.9	11.6	1998-07-30 02:00:00	1998-07-30 17:30:00	1998-07-31 05:00:00	213	437	214.5	2595025
393	1998-07-31 14:08:34	1998-08-01 10:32:32	1998-08-01 19:00:00	2.23402	7.6	16.1	1998-07-31 14:23:34	1998-07-31 14:30:00	1998-08-02 04:00:00	315	313	231.5	433863
394	1998-08-02 13:08:34	1998-08-02 13:38:34	1998-08-02 23:00:00	0.614278	1.7	22.4	1998-08-02 20:00:00	1998-08-02 21:30:00	1998-08-03 08:00:00	286	318	146	192525
395	1998-08-17 11:30:00	1998-08-17 14:29:59	1998-08-17 22:00:00	0.799994	2	2.2	1998-08-17 12:00:00	1998-08-17 21:30:00	1998-08-18 04:00:00	26.5	41	26.25	437203
396	1998-08-18 03:00:00	1998-08-18 03:30:00	1998-08-18 06:00:00	0.1	0.3	4.2	1998-08-18 06:00:00	1998-08-18 07:45:00	1998-08-18 15:00:00	29.5	34	12	89962.5
397	1998-08-19 12:00:00	1998-08-19 12:30:00	1998-08-19 19:00:00	0.3	0.8	8	1998-08-19 17:00:00	1998-08-20 07:45:00	1998-08-23 19:00:00	21	33	23.75	1.47322e+07
398	1998-08-20 11:02:36	1998-08-20 11:32:36	1998-08-20 13:00:00	2.20433	2.4	6.9	1998-08-20 12:00:00	1998-08-21 10:30:00	1998-08-21 12:00:00	30.5	34	29	48431.2
399	1998-08-26 21:30:00	1998-08-26 22:00:00	1998-08-27 05:00:00	0.133333	0.6	4	1998-08-26 23:00:00	1998-08-28 03:15:00	1998-08-30 18:00:00	32.75	54	15.5	1.13696e+07
400	1998-09-08 22:00:00	1998-09-08 22:30:00	1998-09-09	0.2	0.4	0.5	1998-09-08 23:00:00	1998-09-09 14:30:00	1998-09-09 22:00:00	35	56	21	794035
401	1998-09-11 02:00:00	1998-09-11 02:30:00	1998-09-11 05:00:00	0.1	0.4	0.9	1998-09-11 08:00:00	1998-09-11 14:00:00	1998-09-12 13:00:00	13	46	17	873093
402	1998-09-12 06:00:00	1998-09-12 10:30:04	1998-09-12 18:00:00	0.3	1.7	1.3	1998-09-12 06:00:00	1998-09-12 22:15:00	1998-09-14 18:00:00	25.25	124	42	5.09081e+06
403	1998-09-13 10:00:00	1998-09-13 12:49:58	1998-09-13 15:00:00	0.233325	0.8	3	1998-09-13 13:00:00	1998-09-13 14:00:00	1998-09-13 16:00:00	66.25	71	59	43443.8
404	1998-10-30 19:00:00	1998-10-30 21:28:50	1998-10-31 05:00:00	0.2	1.4	24	1998-10-30 19:00:00	1998-10-30 20:30:00	1998-10-31 12:00:00	5.4	7.1	4.1	36289.9
405	1998-11-01 21:00:00	1998-11-02 03:30:25	1998-11-03 03:00:00	0.3	4.4	25.4	1998-11-01 21:00:00	1998-11-02 23:00:00	1998-11-03 05:00:00	75.75	119	80.25	750716
406	1998-11-17 23:00:00	1998-11-17 23:30:00	1998-11-18 02:00:00	0.1	0.4	0	1998-11-17 23:00:00	1998-11-18 18:15:00	1998-11-18 22:00:00	62.75	286	68.5	516375
407	1998-11-19 01:00:00	1998-11-19 01:30:00	1998-11-19 05:00:00	0.1	0.5	0.4	1998-11-19 02:00:00	1998-11-19 04:15:00	1998-11-19 07:00:00	70.75	78	67.5	54945
408	1998-12-08 17:00:00	1998-12-09 01:29:57	1998-12-09 16:00:00	0.59986	5.1	0.6	1998-12-08 17:00:00	1998-12-10 13:30:00	1998-12-10 19:00:00	26.5	32	25.75	126594
409	1998-12-30 12:00:00	1998-12-30 12:30:00	1998-12-30 18:00:00	0.1	0.7	1.5	1998-12-30 12:00:00	1998-12-31 13:30:00	1998-12-31 20:00:00	92	106	87.75	284462
410	1999-01-01 13:00:00	1999-01-01 20:30:26	1999-01-02 01:00:00	0.3	2	2.4	1999-01-01 15:00:00	1999-01-02 11:15:00	1999-01-02 19:00:00	98.25	142	91.25	907594
411	1999-01-05 01:20:00	1999-01-05 10:29:56	1999-01-05 23:00:00	0.499896	2.8	3.1	1999-01-05 04:00:00	1999-01-05 15:15:00	1999-01-06 05:00:00	68.25	124	91	1428678
412	1999-01-08 06:00:00	1999-01-08 13:20:13	1999-01-08 16:00:00	0.2	1.3	3	1999-01-08 06:00:00	1999-01-08 06:45:00	1999-01-08 18:00:00	96.25	99	82.5	54632.8
413	1999-01-17	1999-01-17 01:19:53	1999-01-17 03:00:00	0.3	0.8	0	1999-01-17 00:15:00	1999-01-17 00:15:00	1999-01-17 07:00:00	78	78	67.75	36304.2
414	1999-01-17 12:00:00	1999-01-17 12:30:00	1999-01-17 15:00:00	0.1	0.4	0.8	1999-01-17 12:00:00	1999-01-17 18:00:00	1999-01-17 21:00:00	65.75	73	65	105769
415	1999-01-19 05:08:34	1999-01-19 05:38:34	1999-01-19 07:00:00	0.642833	1	1.4	1999-01-19 05:23:34	1999-01-19 05:45:00	1999-01-19 10:00:00	94	93	74.75	3075
416	1999-01-21 13:00:00	1999-01-21 16:30:03	1999-01-22	1.1999	6.3	2.5	1999-01-21 13:00:00	1999-01-22 02:15:00	1999-01-22 04:00:00	72	98	84.5	283838
417	1999-02-11 06:00:00	1999-02-11 06:30:00	1999-02-11 08:00:00	0.1	0.3	0.6	1999-02-11 09:00:00	1999-02-11 13:15:00	1999-02-12 03:00:00	38.5	56	20	1.04946e+06
418	1999-03-11 19:00:00	1999-03-12 04:29:58	1999-03-12 17:00:00	0.299963	2.6	1.1	1999-03-11 20:00:00	1999-03-13 00:45:00	1999-03-13 11:00:00	44.75	60	45	712830
419	1999-04-26 02:00:00	1999-04-26 12:44:13	1999-04-26 17:00:00	0.2	2.2	59.9	1999-04-26 06:00:00	1999-04-26 07:15:00	1999-04-26 20:00:00	10.75	12	8.475	28372.5
420	1999-04-27 13:30:00	1999-04-27 14:00:00	1999-04-27 19:00:00	0.2	0.7	61.4	1999-04-27 14:00:00	1999-04-27 15:30:00	1999-04-27 20:00:00	8.15	9.6	8.175	8690.62
421	1999-05-05 02:00:00	1999-05-05 05:29:57	1999-05-05 08:00:00	0.199932	0.8	7.4	1999-05-05 02:15:00	1999-05-05 03:00:00	1999-05-05 10:00:00	2280	2280	2020	1.08871e+06
422	1999-05-05 14:00:00	1999-05-05 16:58:59	1999-05-05 19:00:00	0.2	0.9	8.2	1999-05-05 14:15:00	1999-05-05 15:30:00	1999-05-06 01:00:00	1970	1970	1640	289884
423	1999-05-06 16:00:00	1999-05-06 17:29:55	1999-05-06 18:00:00	0.224698	0.4	9.1	1999-05-06 16:15:00	1999-05-06 16:15:00	1999-05-06 21:00:00	1510	1500	1407.5	22440.8
424	1999-05-09 23:00:00	1999-05-10 06:29:56	1999-05-10 08:00:00	0.99969	3.2	2.1	1999-05-09 23:15:00	1999-05-11 00:30:00	1999-05-11 02:00:00	1240	1320	1277.5	196875
425	1999-05-14 09:15:00	1999-05-14 10:29:59	1999-05-14 16:00:00	0.699949	1.6	4.5	1999-05-14 11:00:00	1999-05-14 12:00:00	1999-05-14 19:00:00	668	674	114.25	401259
426	1999-05-20 06:00:00	1999-05-20 14:29:57	1999-05-20 18:00:00	0.79979	4	8.1	1999-05-20 07:00:00	1999-05-20 17:00:00	1999-05-20 20:00:00	767.25	1150	917	2.48177e+06
427	1999-05-22 18:20:00	1999-05-22 19:29:58	1999-05-22 20:00:00	0.599899	0.9	4	1999-05-22 21:00:00	1999-05-23 11:30:00	1999-05-23 19:00:00	994	1220	1140	3.03948e+06
428	1999-05-26 10:00:00	1999-05-26 15:30:17	1999-05-26 18:00:00	0.3	1.2	4.9	1999-05-26 10:00:00	1999-05-26 10:30:00	1999-05-26 20:00:00	1520	1530	1320	198000
429	1999-05-27 01:00:00	1999-05-27 15:46:30	1999-05-27 20:00:00	0.8	5.9	6.1	1999-05-27 01:00:00	1999-05-28 13:30:00	1999-05-28 15:00:00	1330	1560	1417.5	7.45694e+06
430	1999-05-28 13:20:00	1999-05-28 13:50:00	1999-05-28 17:00:00	0.211111	0.4	12	1999-05-28 16:00:00	1999-05-29 08:45:00	1999-05-29 13:00:00	1420	1760	1650	1.76443e+06
431	1999-06-16 23:15:00	1999-06-17 00:29:59	1999-06-17 01:00:00	1.83887	2.3	20.2	1999-06-17 01:00:00	1999-06-18 00:45:00	1999-06-20 22:00:00	1770	2210	2087.5	1.35148e+08
432	1999-06-17 12:20:00	1999-06-17 13:30:04	1999-06-17 21:00:00	1.09974	3.1	22.5	1999-06-17 13:00:00	1999-06-18 11:15:00	1999-06-18 15:00:00	1990	2820	2530	8.19571e+06
433	1999-06-18 12:05:00	1999-06-18 12:35:00	1999-06-18 14:00:00	1.11667	1.4	21.8	1999-06-18 20:00:00	1999-06-19 06:00:00	1999-06-19 08:00:00	2432.5	2920	2680	1.6207e+06
434	1999-07-16 11:30:00	1999-07-16 14:30:05	1999-07-16 21:00:00	0.998668	3.6	2.7	1999-07-16 13:00:00	1999-07-17 00:15:00	1999-07-17 03:00:00	249.75	374	260	2.04476e+06
435	1999-07-17 15:03:09	1999-07-17 15:33:09	1999-07-17 18:00:00	1.80262	2	6.3	1999-07-17 15:18:09	1999-07-17 15:45:00	1999-07-18	291	293	230.75	179775
436	1999-07-18 16:30:00	1999-07-18 19:29:59	1999-07-18 20:00:00	0.299998	0.9	8.6	1999-07-18 19:00:00	1999-07-18 20:45:00	1999-07-19 05:00:00	306.25	325	275.5	399263
437	1999-07-19 01:10:00	1999-07-19 01:40:00	1999-07-19 05:00:00	0.516667	0.8	9.5	1999-07-19 06:00:00	1999-07-20 02:45:00	1999-07-21 06:00:00	278.5	352	242.25	9.11143e+06
438	1999-07-19 11:06:00	1999-07-19 12:30:00	1999-07-19 19:00:00	1.49988	4.3	10.3	1999-07-19 12:00:00	1999-07-20 11:00:00	1999-07-21 06:00:00	285	488	242.25	8.51218e+06
439	1999-07-20 14:06:00	1999-07-20 14:36:00	1999-07-20 19:00:00	0.93	1.5	13.2	1999-07-20 14:21:00	1999-07-20 14:30:00	1999-07-21 06:00:00	401	394	242.25	2318.95
440	1999-07-22 13:00:00	1999-07-22 13:30:00	1999-07-22 19:00:00	0.2	0.9	10.7	1999-07-22 14:00:00	1999-07-23 16:00:00	1999-07-24 08:00:00	160.75	465	214.75	1.10511e+07
441	1999-07-24 13:30:00	1999-07-24 20:29:58	1999-07-25 01:00:00	0.399892	1.8	8.4	1999-07-24 14:00:00	1999-07-25 20:30:00	1999-07-26 04:00:00	238.5	346	247.5	3.89728e+06
442	1999-07-28 03:00:00	1999-07-28 03:30:00	1999-07-28 05:00:00	0.2	0.5	4.2	1999-07-28 04:00:00	1999-07-28 11:45:00	1999-07-29 15:00:00	216.5	272	227.25	3.53351e+06
443	1999-07-30 11:00:00	1999-07-30 15:29:58	1999-07-30 22:00:00	1.0999	3.9	6	1999-07-30 13:00:00	1999-07-31 20:00:00	1999-08-02 18:00:00	221.25	343	248.25	2.00071e+07
444	1999-07-31 07:00:00	1999-07-31 13:30:01	1999-07-31 20:00:00	2.69975	9.1	8.1	1999-07-31 08:00:00	1999-08-01 12:30:00	1999-08-02 07:00:00	265.5	411	293.25	8.39232e+06
445	1999-08-04 08:20:00	1999-08-04 16:30:01	1999-08-06 01:00:00	2.19973	15.7	17.2	1999-08-04 09:00:00	1999-08-04 10:15:00	1999-08-06 06:00:00	216.25	536	228.5	6.9535e+06
446	1999-08-16 21:30:00	1999-08-16 22:29:57	1999-08-17	0.299933	0.6	1.2	1999-08-16 21:45:00	1999-08-16 22:00:00	1999-08-17 03:00:00	85	86	33.5	3107.14
447	1999-08-19 13:12:00	1999-08-19 19:29:59	1999-08-19 22:00:00	0.799964	3.5	3.6	1999-08-19 14:00:00	1999-08-20 13:45:00	1999-08-21 08:00:00	33.5	178	67.75	8.27726e+06
448	1999-08-24 23:00:00	1999-08-25 00:29:55	1999-08-25 01:00:00	0.513597	0.7	7.4	1999-08-24 23:00:00	1999-08-25 23:45:00	1999-08-27 09:00:00	46	65	47.5	2.43663e+06
449	1999-08-25 14:30:00	1999-08-25 15:00:00	1999-08-25 16:00:00	0.15	0.3	4.6	1999-08-25 15:00:00	1999-08-26 05:30:00	1999-08-27 09:00:00	43.5	78	47.5	2625975
450	1999-08-29 09:30:00	1999-08-29 10:29:57	1999-08-29 12:00:00	0.599732	1	3.7	1999-08-29 12:00:00	1999-08-29 22:00:00	1999-08-30	42.25	123	43.25	884925
451	1999-08-30 22:00:00	1999-08-30 22:30:00	1999-08-31 01:00:00	0.1	0.4	4.7	1999-08-30 22:00:00	1999-08-30 22:30:00	1999-08-31 04:00:00	76	78	75.5	3712.5
452	1999-09-01 11:20:00	1999-09-01 13:29:59	1999-09-02 02:00:00	1.19999	4.2	5.9	1999-09-01 12:00:00	1999-09-01 19:00:00	1999-09-02 05:00:00	74.5	394	73.25	2.19269e+06
453	1999-09-11 11:00:00	1999-09-11 13:29:56	1999-09-11 14:00:00	0.611876	1.2	0.8	1999-09-11 12:00:00	1999-09-11 13:45:00	1999-09-13 22:00:00	55.5	110	42.5	7.46625e+06
454	1999-10-06 17:00:00	1999-10-06 19:29:56	1999-10-06 20:00:00	0.199848	0.4	0	1999-10-06 17:00:00	1999-10-06 18:15:00	1999-10-06 22:00:00	7.225	8.3	4.8	10644.8
455	1999-10-07 06:00:00	1999-10-07 10:12:38	1999-10-07 12:00:00	0.3	1.2	0.4	1999-10-07 06:00:00	1999-10-07 07:00:00	1999-10-07 17:00:00	5.95	6.7	4.3	16222.5
456	1999-10-29 09:00:00	1999-10-29 09:30:00	1999-10-29 15:00:00	0.3	0.8	1.8	1999-10-29 13:00:00	1999-10-30 15:00:00	1999-10-31 10:00:00	79.5	95	81.25	916489
457	1999-11-25 15:00:00	1999-11-25 15:30:00	1999-11-25 17:00:00	0.2	0.5	7.2	1999-11-25 18:00:00	1999-11-26 17:00:00	1999-11-29 21:00:00	28.75	64	52.5	9.10842e+06
458	1999-12-07 12:00:00	1999-12-07 12:30:00	1999-12-07 16:00:00	0.1	0.3	1.5	1999-12-07 15:00:00	1999-12-07 19:00:00	1999-12-08	36.25	57	48	233106
459	1999-12-08 04:00:00	1999-12-08 04:30:00	1999-12-08 10:00:00	0.2	0.8	1.8	1999-12-08 04:00:00	1999-12-08 20:15:00	1999-12-09 09:00:00	51	72	31.6	1212660
460	1999-12-14	1999-12-14 00:30:00	1999-12-14 03:00:00	0.1	0.4	0.8	1999-12-14 05:00:00	1999-12-14 12:45:00	1999-12-14 16:00:00	56.75	65	34.5	265668
461	1999-12-19 10:00:00	1999-12-19 10:30:00	1999-12-19 16:00:00	0.1	0.7	1.3	1999-12-19 16:00:00	1999-12-19 19:15:00	1999-12-20 06:00:00	39	78	32.75	857600
462	1999-12-21 09:00:00	1999-12-21 09:30:00	1999-12-21 11:00:00	0.1	0.3	1.6	1999-12-21 09:00:00	1999-12-21 21:15:00	1999-12-22 05:00:00	47.8	65	29	909842
463	1999-12-22 08:00:00	1999-12-22 08:30:00	1999-12-22 13:00:00	0.1	0.6	1.9	1999-12-22 09:00:00	1999-12-22 21:30:00	1999-12-23	37.6	67	55.25	291208
464	2000-01-10 18:00:00	2000-01-10 18:30:00	2000-01-11	0.1	0.5	2	2000-01-10 19:00:00	2000-01-11 12:00:00	2000-01-11 14:00:00	42.5	54	47.5	216187
465	2000-01-11 23:00:00	2000-01-12 01:30:02	2000-01-12 05:00:00	0.999669	2.3	1.9	2000-01-12	2000-01-12 11:00:00	2000-01-12 13:00:00	49.5	82	36.75	314376
466	2000-02-10 12:00:00	2000-02-11 05:40:09	2000-02-11 12:00:00	1	8.1	0	2000-02-10 14:00:00	2000-02-11 03:00:00	2000-02-11 15:00:00	70.25	79	71.5	313271
467	2000-02-12 11:00:00	2000-02-12 16:29:59	2000-02-13 07:00:00	0.399998	3	8.1	2000-02-12 13:00:00	2000-02-13 00:30:00	2000-02-13 08:00:00	63.75	86	75	530224
468	2000-02-15 11:00:00	2000-02-15 11:30:00	2000-02-15 17:00:00	0.1	0.7	12.3	2000-02-15 11:00:00	2000-02-15 22:15:00	2000-02-16 05:00:00	70.25	99.9	86.75	457260
469	2000-02-22 12:00:00	2000-02-22 14:58:59	2000-02-22 23:00:00	0.2	1.5	4.6	2000-02-22 14:00:00	2000-02-23 01:00:00	2000-02-23 06:00:00	89	95	90.75	58454.3
470	2000-03-28 17:00:00	2000-03-28 20:58:49	2000-03-28 23:00:00	0.2	0.9	0.3	2000-03-28 17:00:00	2000-03-28 17:30:00	2000-03-29 01:00:00	4.9	5.2	2.3	5928.75
471	2000-03-29 21:00:00	2000-03-30 12:29:59	2000-03-31 19:00:00	0.399994	7.2	1.2	2000-03-29 21:00:00	2000-04-01 17:45:00	2000-04-04 09:00:00	1.4	21	8.3	5.78406e+06
472	2000-04-02 09:00:00	2000-04-02 11:29:56	2000-04-02 16:00:00	0.6999	2.7	8.6	2000-04-02 10:00:00	2000-04-03 14:15:00	2000-04-04 09:00:00	21.2	44	8.3	2.33845e+06
473	2000-04-19 08:00:00	2000-04-19 11:34:04	2000-04-19 15:00:00	0.4	2.1	2.9	2000-04-19 08:00:00	2000-04-19 20:00:00	2000-04-20 14:00:00	66.75	91	1.4	1.31538e+06
474	2000-04-23 06:00:00	2000-04-23 09:30:03	2000-04-23 13:00:00	0.5	2.2	5.4	2000-04-23 06:00:00	2000-04-23 12:45:00	2000-04-23 14:00:00	30.5	310	209	1.06975e+06
475	2000-04-24 06:30:00	2000-04-24 10:30:01	2000-04-24 15:00:00	0.299968	1.2	7.8	2000-04-24 11:00:00	2000-04-24 12:00:00	2000-04-24 19:00:00	85.5	146	93	688486
476	2000-04-29 14:00:00	2000-04-29 14:30:00	2000-04-30 02:00:00	1	4.8	1.5	2000-04-29 15:00:00	2000-04-30 15:15:00	2000-04-30 18:00:00	151.25	267	22.5	1.17805e+07
477	2000-05-08 11:00:00	2000-05-08 16:11:51	2000-05-08 18:00:00	0.5	2.8	1.1	2000-05-08 11:00:00	2000-05-08 12:30:00	2000-05-09 01:00:00	616.25	627	297.5	1.33381e+06
478	2000-05-25 13:20:00	2000-05-25 20:29:59	2000-05-25 23:00:00	0.499995	1.6	3	2000-05-25 14:00:00	2000-05-26 09:45:00	2000-05-27 01:00:00	94.25	249	18.25	6.79095e+06
479	2000-05-26 19:15:00	2000-05-26 20:29:59	2000-05-26 23:00:00	0.499983	1.4	3.7	2000-05-27 03:00:00	2000-05-27 09:15:00	2000-05-27 22:00:00	26.75	113	5.35	2.68841e+06
480	2000-06-27 09:30:00	2000-06-27 12:29:59	2000-06-27 23:00:00	0.699996	2.9	7.3	2000-06-27 11:00:00	2000-06-27 16:45:00	2000-06-28 02:00:00	91.5	123	78.25	817984
481	2000-07-08 17:04:36	2000-07-08 17:34:36	2000-07-08 19:00:00	1.323	1.7	0.1	2000-07-08 19:00:00	2000-07-09 15:00:00	2000-07-11 07:00:00	94.75	122	94	4.43756e+06
482	2000-08-05 14:00:00	2000-08-05 14:30:00	2000-08-05 17:00:00	0.1	0.3	8.5	2000-08-06 01:00:00	2000-08-06 14:45:00	2000-08-06 19:00:00	10	129	11	925912
483	2000-08-11 16:00:00	2000-08-11 18:29:56	2000-08-11 19:00:00	0.299798	0.6	0.2	2000-08-11 16:00:00	2000-08-11 16:15:00	2000-08-11 20:00:00	126.75	129	109.5	9379.69
484	2000-08-13 12:30:00	2000-08-13 15:29:59	2000-08-13 19:00:00	0.409086	0.8	0.6	2000-08-13 14:00:00	2000-08-13 21:00:00	2000-08-14 01:00:00	66.75	198	49.25	663333
485	2000-08-15 14:00:00	2000-08-15 18:29:58	2000-08-16	7.99786	11.9	1.4	2000-08-15 14:00:00	2000-08-16 08:00:00	2000-08-16 14:00:00	160.25	223	139.75	961355
486	2000-08-17 10:15:00	2000-08-17 13:30:01	2000-08-18	2.39927	7.5	20.8	2000-08-17 16:00:00	2000-08-17 20:30:00	2000-08-18 17:00:00	192.25	225	110.5	2.94855e+06
487	2000-08-18 10:00:00	2000-08-18 13:29:57	2000-08-18 15:00:00	0.99966	2.5	27.7	2000-08-18 10:15:00	2000-08-18 10:15:00	2000-08-18 17:00:00	170	162	110.5	225
488	2000-08-18 20:00:00	2000-08-19 05:00:01	2000-08-19 06:00:00	0.14997	0.6	30.2	2000-08-18 20:00:00	2000-08-18 23:30:00	2000-08-19 09:00:00	121.5	128	106	129089
489	2000-08-20 11:00:00	2000-08-20 12:30:01	2000-08-20 14:00:00	1.3996	2.1	30	2000-08-20 11:00:00	2000-08-20 20:30:00	2000-08-20 22:00:00	120	313	140.5	1779300
490	2000-08-21 15:30:00	2000-08-21 16:29:57	2000-08-21 17:00:00	0.399866	0.6	20.2	2000-08-21 16:00:00	2000-08-22 08:00:00	2000-08-22 21:00:00	155.25	190	86.75	2.20887e+06
491	2000-08-22 16:15:00	2000-08-22 18:29:54	2000-08-22 19:00:00	1.79884	3	13.3	2000-08-22 22:00:00	2000-08-23 10:45:00	2000-08-24 15:00:00	87.25	110	40.5	4.77401e+06
492	2000-08-26 11:20:00	2000-08-26 11:50:00	2000-08-27	0.266667	1.3	13.4	2000-08-26 12:00:00	2000-08-27 01:00:00	2000-08-29 11:00:00	127.75	264	156	1.11282e+07
493	2000-09-06 23:00:00	2000-09-06 23:30:00	2000-09-07 03:00:00	0.1	0.5	3.4	2000-09-07 02:00:00	2000-09-07 20:00:00	2000-09-07 22:00:00	74.25	83	65.25	144292
494	2000-09-08 13:00:00	2000-09-08 16:29:57	2000-09-08 17:00:00	0.70537	1.3	1.4	2000-09-08 14:00:00	2000-09-09 11:15:00	2000-09-09 13:00:00	100	108	50.75	1.20256e+06
495	2000-10-28 14:00:00	2000-10-28 14:30:00	2000-10-28 20:00:00	0.1	0.7	3.4	2000-10-28 16:00:00	2000-10-28 23:15:00	2000-10-29 01:00:00	7.5	8.3	7.2	7522.5
496	2000-11-28	2000-11-28 00:30:00	2000-11-28 02:00:00	0.1	0.3	0.7	2000-11-28 04:00:00	2000-11-28 20:15:00	2000-11-28 22:00:00	4.8	5.2	4.8	1800
497	2000-12-05 13:00:00	2000-12-05 15:30:02	2000-12-05 17:00:00	0.199934	0.6	0.4	2000-12-05 19:00:00	2000-12-06 02:15:00	2000-12-06 10:00:00	21.75	29	20	174038
498	2000-12-14 13:00:00	2000-12-14 13:30:00	2000-12-14 15:00:00	0.1	0.3	2.1	2000-12-15 11:00:00	2000-12-15 15:00:00	2000-12-16 04:00:00	25.5	29	25	257089
499	2000-12-16 00:30:00	2000-12-16 01:29:57	2000-12-16 03:00:00	0.299933	0.6	2.9	2000-12-16 12:00:00	2000-12-16 14:30:00	2000-12-16 17:00:00	26	42	35	70650
500	2000-12-17 13:30:00	2000-12-17 18:30:02	2000-12-18	0.2	1.2	2.1	2000-12-17 13:45:00	2000-12-17 14:00:00	2000-12-18 02:00:00	38	43	21	23794.9
501	2000-12-22 19:00:00	2000-12-22 19:30:00	2000-12-22 22:00:00	0.1	0.4	2.6	2000-12-22 19:00:00	2000-12-22 20:45:00	2000-12-22 23:00:00	24	25	24	1800
502	2000-12-24 18:00:00	2000-12-25 03:32:47	2000-12-25 15:00:00	0.4	2.9	1.8	2000-12-24 20:00:00	2000-12-26 12:30:00	2000-12-26 16:00:00	23.25	36	27	164617
503	2001-02-11 16:00:00	2001-02-11 16:30:00	2001-02-11 18:00:00	0.1	0.3	2.8	2001-02-12 10:00:00	2001-02-12 13:30:00	2001-02-12 17:00:00	11.5	20	15	61987.5
504	2001-02-13 21:00:00	2001-02-13 22:30:01	2001-02-14 13:00:00	0.299934	1.6	3.1	2001-02-14 10:00:00	2001-02-15 12:45:00	2001-02-15 22:00:00	14	16	15	135794
505	2001-02-19 12:00:00	2001-02-19 13:30:01	2001-02-19 16:00:00	0.199967	0.6	1.6	2001-02-19 14:00:00	2001-02-19 15:00:00	2001-02-19 19:00:00	23.25	25	24	12363.8
506	2001-03-05 15:30:00	2001-03-05 16:00:00	2001-03-05 17:00:00	0.15	0.3	0.8	2001-03-05 19:00:00	2001-03-05 20:15:00	2001-03-05 23:00:00	16.75	18	17	9787.5
507	2001-03-14 09:30:00	2001-03-14 10:30:15	2001-03-14 16:00:00	0.3	1	8.3	2001-03-14 12:00:00	2001-03-14 19:00:00	2001-03-14 21:00:00	20.5	29	15.75	50150
508	2001-03-16 11:00:00	2001-03-16 11:30:00	2001-03-16 15:00:00	0.1	0.5	4.7	2001-03-16 11:00:00	2001-03-16 17:15:00	2001-03-16 19:00:00	14.25	27	16	12825
509	2001-03-17 18:00:00	2001-03-17 18:30:00	2001-03-17 21:00:00	0.1	0.4	4.2	2001-03-18 02:00:00	2001-03-18 03:30:00	2001-03-18 08:00:00	15	16	14.25	10096.9
510	2001-05-06 21:30:00	2001-05-06 22:29:57	2001-05-06 23:00:00	0.899781	1.2	44.9	2001-05-06 22:00:00	2001-05-07 09:15:00	2001-05-07 23:00:00	336.25	454	288.75	7438050
511	2001-05-17 05:20:00	2001-05-17 16:29:58	2001-05-17 20:00:00	1.19996	7.1	0.2	2001-05-17 06:00:00	2001-05-18 10:30:00	2001-05-18 16:00:00	385.5	578	461.5	5.90597e+06
512	2001-05-18 18:00:00	2001-05-18 23:29:59	2001-05-19 19:00:00	1.2	7.7	7.3	2001-05-18 18:00:00	2001-05-19 10:45:00	2001-05-20 02:00:00	498	655	375	8.18163e+06
513	2001-05-26 13:12:00	2001-05-26 14:29:59	2001-05-26 23:00:00	0.999965	3.7	3.2	2001-05-26 14:00:00	2001-05-27 14:00:00	2001-05-27 20:00:00	52.5	172	112	1.56284e+06
514	2001-05-27 06:00:00	2001-05-27 13:30:02	2001-05-27 17:00:00	0.399872	1.8	3.7	2001-05-27 06:00:00	2001-05-28 08:45:00	2001-05-29 02:00:00	34.25	418	108.5	1.7169e+07
515	2001-05-28 13:20:00	2001-05-28 15:29:59	2001-05-28 20:00:00	0.399999	1.2	5.5	2001-05-29 03:00:00	2001-05-29 13:15:00	2001-05-29 19:00:00	110.5	532	344.5	9.61436e+06
516	2001-05-29 11:00:00	2001-05-29 15:39:59	2001-05-29 20:00:00	0.505556	1.2	6.7	2001-05-29 11:00:00	2001-05-30 07:45:00	2001-05-30 22:00:00	483.25	713	192	1.88346e+07
517	2001-05-30 10:20:00	2001-05-30 12:29:59	2001-05-30 19:00:00	1.4	4	7.9	2001-05-30 10:35:00	2001-05-30 10:45:00	2001-05-30 22:00:00	674	665	192	1031820
518	2001-06-02 18:30:00	2001-06-02 19:00:00	2001-06-02 20:00:00	0.15	0.3	6.4	2001-06-02 21:00:00	2001-06-03 08:30:00	2001-06-03 16:00:00	213.75	578	464.25	5.31173e+06
519	2001-06-03 12:00:00	2001-06-03 17:29:59	2001-06-03 21:00:00	0.999984	2.1	6.8	2001-06-03 21:00:00	2001-06-04 07:30:00	2001-06-04 17:00:00	368.75	583	411.5	4.78845e+06
520	2001-06-09 15:30:00	2001-06-09 16:00:00	2001-06-09 19:00:00	0.116667	0.3	1.2	2001-06-10 09:00:00	2001-06-10 11:00:00	2001-06-10 19:00:00	1.175	91	19.25	1.45154e+06
521	2001-06-13 12:00:00	2001-06-13 14:58:59	2001-06-13 20:00:00	0.2	1.2	0.5	2001-06-13 14:00:00	2001-06-13 16:30:00	2001-06-14 21:00:00	76.75	440	243.25	2.07967e+07
522	2001-06-14 08:00:00	2001-06-14 13:00:02	2001-06-14 14:00:00	0.2	0.8	1.6	2001-06-14 08:15:00	2001-06-14 08:15:00	2001-06-14 21:00:00	365	365	243.25	47618.4
523	2001-06-24 14:00:00	2001-06-24 19:29:59	2001-06-24 21:00:00	0.499996	1.4	0.4	2001-06-24 14:00:00	2001-06-25 13:00:00	2001-06-25 14:00:00	137.5	205	142.75	370673
524	2001-06-25 16:30:00	2001-06-25 17:00:00	2001-06-25 18:00:00	0.15	0.3	1.8	2001-06-25 18:00:00	2001-06-25 19:15:00	2001-06-26	150	174	107	174638
525	2001-06-26 17:30:00	2001-06-26 18:00:00	2001-06-26 19:00:00	0.15	0.3	1.7	2001-06-26 19:00:00	2001-06-27 12:30:00	2001-06-28 06:00:00	89.5	492	208.5	13221810
526	2001-07-04 13:12:00	2001-07-04 13:42:00	2001-07-04 15:00:00	0.42	0.6	1.6	2001-07-04 14:00:00	2001-07-05 14:30:00	2001-07-06 05:00:00	94	122	100.45	1.06147e+06
527	2001-07-05 13:30:00	2001-07-05 14:29:57	2001-07-05 15:00:00	0.399866	0.6	1.6	2001-07-05 14:00:00	2001-07-05 16:15:00	2001-07-06 05:00:00	119.25	129	100.45	350034
528	2001-07-08 11:00:00	2001-07-08 16:45:01	2001-07-09 04:00:00	0.349904	2.8	8.9	2001-07-08 11:00:00	2001-07-08 12:15:00	2001-07-09 06:00:00	299.75	310	183	94562.2
529	2001-07-10 12:15:00	2001-07-10 23:29:59	2001-07-11 01:00:00	0.799958	4.3	10.8	2001-07-10 13:00:00	2001-07-11 13:45:00	2001-07-12 13:00:00	267	305	104.5	4.24682e+06
530	2001-08-01 16:12:00	2001-08-01 16:42:00	2001-08-01 18:00:00	0.42	0.6	0.5	2001-08-02 07:00:00	2001-08-02 11:00:00	2001-08-02 19:00:00	16.5	44	11	486675
531	2001-08-02 12:20:00	2001-08-02 12:50:00	2001-08-02 18:00:00	0.208333	0.5	1.1	2001-08-03 01:00:00	2001-08-03 16:15:00	2001-08-03 21:00:00	10.75	69	16.5	385951
532	2001-08-05 15:00:00	2001-08-05 15:30:00	2001-08-05 18:00:00	0.2	0.5	1.6	2001-08-05 15:00:00	2001-08-05 15:30:00	2001-08-06 01:00:00	29	36	6.7	13810.5
533	2001-08-07 16:00:00	2001-08-07 17:29:55	2001-08-07 18:00:00	3.79506	4	6.8	2001-08-07 16:15:00	2001-08-07 16:15:00	2001-08-08 03:00:00	136	134	70.75	0
534	2001-08-08 11:00:00	2001-08-09 09:30:02	2001-08-09 14:00:00	1.89918	14.3	10.2	2001-08-08 13:00:00	2001-08-09 13:30:00	2001-08-10 04:00:00	56	349	124.5	7.84181e+06
535	2001-08-11 11:07:30	2001-08-11 11:37:30	2001-08-11 17:00:00	0.725	1.1	29	2001-08-11 11:22:30	2001-08-11 11:30:00	2001-08-11 18:00:00	92	88	69.75	0
536	2001-08-12 14:00:00	2001-08-12 15:29:19	2001-08-12 16:00:00	0.5	1.1	24.4	2001-08-12 16:00:00	2001-08-12 20:45:00	2001-08-13 02:00:00	36.75	184	12	630377
537	2001-08-14	2001-08-14 05:29:59	2001-08-15 02:00:00	0.399996	4.6	21.5	2001-08-14 01:00:00	2001-08-15 13:15:00	2001-08-15 16:00:00	29.5	69	21.25	1.46126e+06
538	2001-08-15 11:30:00	2001-08-15 18:29:58	2001-08-15 23:00:00	4.99821	6.9	11.8	2001-08-15 12:00:00	2001-08-16 06:30:00	2001-08-16 23:00:00	43.25	89	35.75	2.61434e+06
539	2001-08-19 11:30:00	2001-08-19 14:35:24	2001-08-19 19:00:00	1.01807	1.6	19.2	2001-08-19 12:00:00	2001-08-19 20:45:00	2001-08-20 02:00:00	20	205	11	1.25429e+06
540	2001-08-20 13:30:00	2001-08-20 15:30:04	2001-08-20 19:00:00	0.514216	0.9	16.2	2001-08-20 14:00:00	2001-08-20 14:45:00	2001-08-21 04:00:00	42	45	42	46800
541	2001-08-22 23:00:00	2001-08-22 23:30:00	2001-08-23 01:00:00	0.1	0.3	6	2001-08-22 23:00:00	2001-08-23 12:30:00	2001-08-23 19:00:00	26.75	55	28.5	550761
542	2001-08-28 10:30:00	2001-08-28 11:00:00	2001-08-28 15:00:00	0.1125	0.3	0.4	2001-08-28 12:00:00	2001-08-29 03:00:00	2001-08-29 19:00:00	3.225	11	1.1	512567
543	2001-08-30 11:30:00	2001-08-30 14:29:59	2001-08-30 15:00:00	0.399998	0.8	0.4	2001-08-30 12:00:00	2001-08-31 15:00:00	2001-09-01 22:00:00	14.25	65	24	3.83759e+06
544	2001-08-31 11:00:00	2001-08-31 13:28:50	2001-08-31 15:00:00	0.2	0.8	1.1	2001-08-31 14:00:00	2001-08-31 18:30:00	2001-09-01 09:00:00	53.5	74	55.75	649602
545	2001-09-07 19:00:00	2001-09-07 23:30:04	2001-09-08 16:00:00	1.39973	13.2	5.3	2001-09-07 22:00:00	2001-09-08 09:30:00	2001-09-09 01:00:00	15.25	50	9.4	1.41096e+06
546	2001-09-13 12:30:00	2001-09-13 15:25:29	2001-09-13 20:00:00	0.4	2	13.4	2001-09-13 17:00:00	2001-09-14 19:15:00	2001-09-15 23:00:00	1.325	44	8.175	2.60144e+06
547	2001-10-31 11:30:00	2001-10-31 14:29:59	2001-10-31 15:00:00	0.224998	0.6	0	2001-10-31 22:00:00	2001-11-01 13:30:00	2001-11-02 18:00:00	1.85	8	3.7	576276
548	2001-12-15 14:00:00	2001-12-15 16:32:38	2001-12-15 21:00:00	0.3	1.4	0.3	2001-12-16 18:00:00	2001-12-16 18:45:00	2001-12-16 21:00:00	13.25	41	32	90281.2
549	2001-12-28 11:00:00	2001-12-28 16:29:59	2001-12-28 18:00:00	0.199998	0.8	0	2001-12-28 11:00:00	2001-12-28 13:30:00	2001-12-28 21:00:00	15.5	25	15	118598
550	2002-05-16 06:00:00	2002-05-16 11:29:59	2002-05-16 21:00:00	2.9	9.8	15.2	2002-05-16 15:00:00	2002-05-17 02:15:00	2002-05-17 12:00:00	28.75	51	27.25	798155
551	2002-06-16 15:30:00	2002-06-16 16:00:00	2002-06-16 18:00:00	0.133333	0.4	1	2002-06-16 16:00:00	2002-06-16 17:15:00	2002-06-17 09:00:00	172	174	119	325204
552	2002-07-04 11:30:00	2002-07-04 12:00:00	2002-07-04 13:00:00	0.2	0.4	0	2002-07-04 14:00:00	2002-07-04 14:45:00	2002-07-04 22:00:00	75.25	113	53.5	287634
553	2002-07-05 17:02:43	2002-07-05 17:32:43	2002-07-05 19:00:00	2.11358	2.5	0.4	2002-07-05 17:17:43	2002-07-05 17:30:00	2002-07-05 20:00:00	76	75	45.25	13882.5
554	2002-07-21 10:00:00	2002-07-21 17:29:56	2002-07-21 18:00:00	2.89765	4.4	1.1	2002-07-21 13:00:00	2002-07-21 20:45:00	2002-07-22 16:00:00	9.2	261	17	5402625
555	2002-07-23 12:01:45	2002-07-23 12:31:45	2002-07-23 18:00:00	3.30292	4.1	5.5	2002-07-23 13:00:00	2002-07-24	2002-07-24 07:00:00	9.125	12	8.6	52364.1
556	2002-08-02 15:12:00	2002-08-02 19:30:03	2002-08-02 21:00:00	0.999814	2.7	0.1	2002-08-02 16:00:00	2002-08-02 17:30:00	2002-08-03 01:00:00	26	27	20	34200
557	2002-08-04 13:20:00	2002-08-04 14:29:58	2002-08-04 15:00:00	0.399966	0.7	16.8	2002-08-04 14:00:00	2002-08-04 20:30:00	2002-08-05 01:00:00	132.75	230	27.5	2.3203e+06
558	2002-08-05 11:08:34	2002-08-05 18:30:05	2002-08-05 22:00:00	5.29352	8.6	17.5	2002-08-05 14:00:00	2002-08-05 17:00:00	2002-08-06 10:00:00	46.075	107	28.75	2.87664e+06
559	2002-08-06 12:00:00	2002-08-06 12:30:00	2002-08-06 14:00:00	6.8	7.9	26.1	2002-08-06 12:00:00	2002-08-07 02:00:00	2002-08-07 11:00:00	55.5	86	19	1.42996e+06
560	2002-09-08 12:00:00	2002-09-08 15:29:57	2002-09-09 03:00:00	1.49952	5.4	1.9	2002-09-08 13:00:00	2002-09-09 02:15:00	2002-09-09 10:00:00	16.25	23	13	145819
561	2002-09-11 14:00:00	2002-09-11 16:30:02	2002-09-11 19:00:00	8.19645	16.3	7.4	2002-09-11 14:00:00	2002-09-11 19:45:00	2002-09-12 02:00:00	9.4	60	11	462990
562	2002-09-12 12:12:00	2002-09-12 16:29:57	2002-09-12 19:00:00	8.29394	9.3	23.7	2002-09-12 21:00:00	2002-09-13 19:00:00	2002-09-14 20:00:00	12	35	13	1.18148e+06
563	2002-10-01 15:00:00	2002-10-01 18:28:39	2002-10-01 20:00:00	0.2	0.8	0.7	2002-10-01 18:00:00	2002-10-02 19:00:00	2002-10-03 13:00:00	6.05	9.1	6.75	263392
564	2003-03-17 14:01:39	2003-03-18 02:30:05	2003-03-19 05:00:00	5.79207	59	0	2003-03-18 16:00:00	2003-03-19 07:30:00	2003-03-19 16:00:00	4.35	47	5.8	1.32262e+06
565	2003-03-24 03:02:13	2003-03-24 06:30:04	2003-03-24 08:00:00	8.49434	28.5	0.1	2003-03-24 06:00:00	2003-03-24 11:00:00	2003-03-25 01:00:00	7.4	11	6.9	141026
566	2003-04-15 11:07:30	2003-04-15 15:29:57	2003-04-15 23:00:00	3.99904	18.1	0	2003-04-15 17:00:00	2003-04-15 20:15:00	2003-04-16 07:00:00	3.325	17	3.7	243371
567	2003-05-26 11:12:00	2003-05-26 16:29:58	2003-05-26 17:00:00	3.50018	4.2	0	2003-05-26 11:27:00	2003-05-26 12:15:00	2003-05-26 18:00:00	766	742	509	10142.3
568	2003-05-30 14:04:17	2003-05-30 17:34:44	2003-05-30 20:00:00	7.4	19.2	4.2	2003-05-30 22:00:00	2003-05-31 08:30:00	2003-05-31 21:00:00	794.75	1620	783.75	2.89857e+07
569	2003-06-11 15:30:00	2003-06-11 16:29:57	2003-06-11 18:00:00	2.49846	3.1	7.2	2003-06-12	2003-06-12 07:30:00	2003-06-13 01:00:00	390	911	79.75	1.49743e+07
570	2003-06-13 10:12:00	2003-06-13 11:29:59	2003-06-13 22:00:00	0.799979	2.7	3.1	2003-06-13 11:00:00	2003-06-13 14:00:00	2003-06-13 23:00:00	96.75	347	11	619162
571	2003-06-20 11:15:00	2003-06-20 12:29:59	2003-06-20 17:00:00	30.995	40.2	2.7	2003-06-20 12:00:00	2003-06-21 07:45:00	2003-06-22 03:00:00	410.5	443	122.5	5.05019e+06
572	2003-07-18 11:20:00	2003-07-18 21:30:03	2003-07-19 01:00:00	2.198	4.1	0.9	2003-07-18 15:00:00	2003-07-20 01:00:00	2003-07-20 08:00:00	138.75	171	140	829239
573	2003-07-23 12:05:00	2003-07-23 13:30:00	2003-07-23 17:00:00	5.99909	8	7	2003-07-23 13:00:00	2003-07-23 13:15:00	2003-07-23 19:00:00	84.5	86	83.75	1462.5
574	2003-07-25 13:02:36	2003-07-25 13:32:36	2003-07-25 22:00:00	2.24771	3.8	11.5	2003-07-25 14:00:00	2003-07-26 16:45:00	2003-07-28 12:00:00	56.75	127	38	1.71275e+07
575	2003-07-26 19:10:00	2003-07-26 19:40:00	2003-07-26 22:00:00	0.511111	0.8	13.3	2003-07-27 02:00:00	2003-07-27 14:30:00	2003-07-27 20:00:00	112.25	188	117.75	3362400
576	2003-08-01 13:02:04	2003-08-01 13:32:04	2003-08-01 15:00:00	2.82756	3.7	5.1	2003-08-01 14:00:00	2003-08-01 22:15:00	2003-08-04	34	76	31	5.21344e+06
577	2003-08-03 11:05:00	2003-08-03 12:30:00	2003-08-03 21:00:00	5.09937	11.3	8	2003-08-03 12:00:00	2003-08-04 12:45:00	2003-08-05 17:00:00	79.5	161	45.75	4.93697e+06
578	2003-08-06 17:02:24	2003-08-06 17:32:24	2003-08-06 20:00:00	2.408	2.8	15.2	2003-08-07 01:00:00	2003-08-07 06:30:00	2003-08-08	39	48	24	480443
579	2003-08-09 09:30:00	2003-08-09 14:29:56	2003-08-09 15:00:00	4.39654	6.7	16.1	2003-08-09 11:00:00	2003-08-09 12:30:00	2003-08-09 23:00:00	63	88	53.75	329128
580	2003-08-17 10:00:00	2003-08-18 00:50:31	2003-08-18 03:00:00	0.2	1.4	0	2003-08-17 10:00:00	2003-08-17 23:00:00	2003-08-18 07:00:00	64.25	154	28	982133
581	2003-08-22 12:30:00	2003-08-22 16:30:01	2003-08-22 19:00:00	0.599872	1.8	10.3	2003-08-22 14:00:00	2003-08-22 14:30:00	2003-08-23 02:00:00	130	173	69.5	212569
582	2003-08-26 06:06:00	2003-08-26 06:36:00	2003-08-26 17:00:00	0.95	3.1	5.1	2003-08-26 09:00:00	2003-08-26 09:30:00	2003-08-26 22:00:00	29.25	30	29	31980.3
583	2003-08-29 13:02:43	2003-08-29 17:52:32	2003-08-29 20:00:00	4.3	14.2	4.3	2003-08-29 14:00:00	2003-08-30 20:00:00	2003-08-31 07:00:00	125.25	364	94	3.38441e+06
584	2003-09-06 10:20:00	2003-09-06 14:30:02	2003-09-06 17:00:00	0.399804	1.4	3.9	2003-09-06 10:35:00	2003-09-06 10:45:00	2003-09-06 21:00:00	21	21	20	15431.7
585	2003-09-07 05:30:00	2003-09-07 13:29:59	2003-09-07 16:00:00	2.69992	4.3	5.3	2003-09-07 08:00:00	2003-09-08 11:45:00	2003-09-10 13:00:00	20.75	34	24	1.45248e+06
586	2003-09-09 10:00:00	2003-09-09 14:29:58	2003-09-09 15:00:00	2.20028	2.4	5.7	2003-09-09 10:15:00	2003-09-09 10:15:00	2003-09-09 18:00:00	34	33	31	1480.65
587	2003-12-08 03:06:39	2003-12-08 10:29:58	2003-12-08 23:00:00	1.99939	8.3	0	2003-12-08 06:00:00	2003-12-09 15:45:00	2003-12-09 20:00:00	2.65	15	6.3	250038
588	2004-04-05 12:20:00	2004-04-05 15:30:01	2004-04-06 03:00:00	8.99849	34.5	0	2004-04-05 17:00:00	2004-04-06 13:45:00	2004-04-06 15:00:00	14.5	24	18	101409
589	2004-04-08 10:01:27	2004-04-08 10:31:27	2004-04-09 09:00:00	4.00725	22.6	35.2	2004-04-08 12:00:00	2004-04-10 08:45:00	2004-04-11 10:00:00	17	75	48.25	4.69848e+06
590	2004-05-11 16:00:00	2004-05-11 16:30:00	2004-05-11 19:00:00	0.1	0.4	0	2004-05-12 05:00:00	2004-05-12 10:00:00	2004-05-13	308.75	479	259	5.30502e+06
591	2004-05-14 14:02:18	2004-05-14 14:32:18	2004-05-14 18:00:00	2.67667	5.5	4.7	2004-05-14 15:00:00	2004-05-14 15:45:00	2004-05-15 01:00:00	263.5	267	228.5	38700
592	2004-05-15 09:20:00	2004-05-15 17:31:07	2004-05-15 19:00:00	5.21652	9.1	10.2	2004-05-15 09:35:00	2004-05-15 09:45:00	2004-05-16 02:00:00	253	251	195.75	16205.2
593	2004-05-24 22:05:27	2004-05-25 02:29:55	2004-05-25 03:00:00	1.5985	3.4	0	2004-05-24 22:20:27	2004-05-24 22:30:00	2004-05-25 05:00:00	144	139	102	450
594	2004-05-25 13:07:30	2004-05-25 14:30:00	2004-05-25 19:00:00	2.4998	4.7	3.4	2004-05-25 20:00:00	2004-05-26 14:45:00	2004-05-27 07:00:00	48.5	95	23.5	2.92895e+06
595	2004-06-03 13:20:00	2004-06-03 15:29:59	2004-06-03 16:00:00	0.514282	0.9	1.6	2004-06-03 14:00:00	2004-06-04 12:30:00	2004-06-05 04:00:00	132.25	217	119.25	3.39055e+06
596	2004-06-04 12:30:00	2004-06-04 13:29:57	2004-06-04 17:00:00	0.599732	1.2	0.9	2004-06-04 14:00:00	2004-06-05 09:30:00	2004-06-05 12:00:00	207.75	225	70.75	1.66913e+06
597	2004-06-12 11:05:27	2004-06-12 13:29:58	2004-06-12 14:00:00	1.09964	2.3	1.5	2004-06-12 12:00:00	2004-06-13 13:00:00	2004-06-13 21:00:00	233	457	390.5	3.44749e+06
598	2004-06-16 08:00:00	2004-06-16 12:29:58	2004-06-16 18:00:00	3.89886	8.1	2.4	2004-06-16 08:00:00	2004-06-17 10:30:00	2004-06-17 18:00:00	391	435	390.5	1.52834e+06
599	2004-06-18 06:04:17	2004-06-18 09:30:02	2004-06-18 20:00:00	6.29909	17	21.7	2004-06-18 10:00:00	2004-06-18 12:00:00	2004-06-19 01:00:00	473	728	379	5250990
600	2004-06-20 11:07:30	2004-06-20 15:31:15	2004-06-20 17:00:00	4.30427	5.4	36.4	2004-06-20 15:00:00	2004-06-21 14:15:00	2004-06-23 05:00:00	209	319	213.75	1.85924e+07
601	2004-06-20 23:15:00	2004-06-21 07:30:01	2004-06-21 19:00:00	3.49836	7.4	41.7	2004-06-21 06:00:00	2004-06-22 06:15:00	2004-06-23 05:00:00	191.5	432	213.75	1.97112e+07
602	2004-06-26 10:03:19	2004-06-26 19:29:59	2004-06-27	4.89912	17.3	25.7	2004-06-26 11:00:00	2004-06-26 17:15:00	2004-06-27 03:00:00	252.5	367	305.5	2.34692e+06
603	2004-06-27 10:00:00	2004-06-27 14:30:04	2004-06-27 17:00:00	2.19934	5.2	30.2	2004-06-27 10:00:00	2004-06-28 10:00:00	2004-06-28 18:00:00	315.25	472	263	5.19117e+06
604	2004-06-28 13:06:39	2004-06-28 13:36:39	2004-06-28 21:00:00	0.903694	1.6	35.4	2004-06-28 19:00:00	2004-06-29 10:30:00	2004-06-30 11:00:00	282	351	307.75	8.72633e+06
605	2004-06-29 10:20:00	2004-06-29 13:29:55	2004-06-29 14:00:00	5.79309	6.2	37	2004-06-29 11:00:00	2004-06-30 01:45:00	2004-06-30 11:00:00	349	595	307.75	5.55836e+06
606	2004-06-30 12:00:00	2004-06-30 15:29:57	2004-06-30 17:00:00	0.699593	1.2	42.6	2004-06-30 12:00:00	2004-07-01 07:00:00	2004-07-02 06:00:00	322.25	997	373	2.28605e+07
607	2004-07-04 13:12:00	2004-07-04 13:42:00	2004-07-04 15:00:00	0.48	0.9	8	2004-07-04 14:00:00	2004-07-05 00:45:00	2004-07-05 14:00:00	210.75	326	182	7.64219e+06
608	2004-07-05 13:08:34	2004-07-05 15:29:59	2004-07-05 16:00:00	0.844394	1.7	2.7	2004-07-05 15:00:00	2004-07-05 17:30:00	2004-07-06 06:00:00	189.25	204	25.5	453206
609	2004-07-13 12:07:30	2004-07-13 14:35:26	2004-07-13 16:00:00	1.00908	2	2.3	2004-07-13 14:00:00	2004-07-13 21:00:00	2004-07-14 04:00:00	148.25	203	67	770372
610	2004-07-14 10:00:00	2004-07-14 14:29:58	2004-07-14 15:00:00	0.224921	0.8	3.6	2004-07-14 10:00:00	2004-07-14 23:45:00	2004-07-15 10:00:00	71.25	117	30.75	3.01891e+06
611	2004-07-16 11:02:43	2004-07-16 11:32:43	2004-07-16 16:00:00	2.12264	4	7.9	2004-07-16 12:00:00	2004-07-17 12:45:00	2004-07-17 21:00:00	111	483	200.5	1.63605e+07
612	2004-07-19 12:04:17	2004-07-19 14:30:00	2004-07-19 16:00:00	3.89909	6.4	10.4	2004-07-19 13:00:00	2004-07-19 21:30:00	2004-07-19 23:00:00	238.75	301	183	683297
613	2004-07-20 13:06:39	2004-07-20 13:36:39	2004-07-20 17:00:00	0.944333	1.6	14	2004-07-20 14:00:00	2004-07-20 15:30:00	2004-07-20 20:00:00	194.75	293	189.25	634406
614	2004-07-21 16:30:00	2004-07-21 17:29:57	2004-07-21 18:00:00	0.699666	0.9	12	2004-07-21 16:45:00	2004-07-21 16:45:00	2004-07-21 19:00:00	197	203	186.5	21525
615	2004-07-24 14:10:00	2004-07-24 16:30:01	2004-07-24 20:00:00	0.999716	2.5	22.8	2004-07-24 14:25:00	2004-07-24 14:30:00	2004-07-24 23:00:00	174	174	151.25	82455.9
616	2004-08-17 10:30:00	2004-08-17 18:34:36	2004-08-17 22:00:00	1.3152	4.3	1.6	2004-08-17 11:00:00	2004-08-18 22:00:00	2004-08-23 20:00:00	40	197	75	6.30811e+07
617	2004-08-19 14:01:25	2004-08-19 14:31:25	2004-08-19 18:00:00	4.23542	6.6	20.5	2004-08-19 15:00:00	2004-08-19 21:00:00	2004-08-20 03:00:00	267.25	335	281.75	850425
618	2004-08-20 12:05:00	2004-08-20 13:30:00	2004-08-20 16:00:00	2.19967	4.5	27.1	2004-08-20 12:20:00	2004-08-20 12:30:00	2004-08-21 09:00:00	296	293	183	1.69915e+06
619	2004-08-22 10:00:00	2004-08-22 11:30:01	2004-08-22 15:00:00	4.09867	6.1	30.6	2004-08-22 12:00:00	2004-08-22 19:00:00	2004-08-23 12:00:00	154	322	80.25	5.25573e+06
620	2004-08-26 14:05:27	2004-08-26 21:30:04	2004-08-27	4.29478	11.7	8.1	2004-08-26 18:00:00	2004-08-27 01:45:00	2004-08-27 14:00:00	82.25	139	95.5	1.17736e+06
621	2004-08-27 10:00:00	2004-08-27 18:30:33	2004-08-27 20:00:00	9.00287	12.2	19.8	2004-08-27 16:00:00	2004-08-28 08:30:00	2004-08-28 14:00:00	98.25	169	70.25	3.93903e+06
622	2004-08-31 13:04:17	2004-08-31 14:29:59	2004-08-31 16:00:00	3.49981	5	23.9	2004-08-31 13:19:17	2004-08-31 13:45:00	2004-08-31 20:00:00	46	47	37.75	7952.88
623	2004-09-04 13:30:00	2004-09-04 17:30:01	2004-09-04 22:00:00	2.39925	4.9	6.1	2004-09-04 19:00:00	2004-09-04 20:45:00	2004-09-07 18:00:00	61	110	71.5	5.90642e+06
624	2004-09-05 05:30:00	2004-09-05 06:00:00	2004-09-05 08:00:00	0.2	0.5	11	2004-09-05 09:00:00	2004-09-06 06:45:00	2004-09-07 11:00:00	78.25	113	83.25	2217060
625	2004-09-19 13:07:30	2004-09-19 13:37:30	2004-09-19 15:00:00	0.7125	0.9	0.9	2004-09-19 14:00:00	2004-09-19 14:15:00	2004-09-19 23:00:00	41.5	43	32	12125
626	2004-09-24 10:30:00	2004-09-24 16:29:57	2004-09-24 17:00:00	0.908464	1.5	11.6	2004-09-24 10:45:00	2004-09-24 10:45:00	2004-09-24 20:00:00	80	82	64.75	24889.9
627	2004-09-25 12:30:00	2004-09-25 13:29:57	2004-09-25 15:00:00	1.49913	2.3	13.1	2004-09-25 13:00:00	2004-09-26 06:30:00	2004-09-26 21:00:00	71.75	104	79.75	1147275
628	2004-09-27 12:06:00	2004-09-27 12:36:00	2004-09-27 14:00:00	0.990226	2	6.9	2004-09-27 13:00:00	2004-09-27 19:15:00	2004-09-28	87	221	90	913582
629	2004-10-12 17:02:36	2004-10-12 17:32:36	2004-10-13 04:00:00	2.20433	4	0	2004-10-12 19:00:00	2004-10-13 15:30:00	2004-10-13 17:00:00	562	625	570	549491
630	2004-12-08 23:00:00	2004-12-09 04:29:59	2004-12-09 05:00:00	0.399998	1.6	0	2004-12-08 23:00:00	2004-12-09 22:45:00	2004-12-10 18:00:00	19.5	33	29	451858
631	2004-12-15 14:00:00	2004-12-15 14:30:00	2004-12-15 22:00:00	0.1	0.6	0	2004-12-15 14:00:00	2004-12-16 10:45:00	2004-12-17	15.25	27	21	485340
632	2005-01-30 15:00:00	2005-01-30 22:29:56	2005-01-31 03:00:00	1.39969	6.6	0.5	2005-01-30 16:00:00	2005-01-31 13:30:00	2005-01-31 19:00:00	23.5	26	21.25	29512.5
633	2005-04-19 15:06:00	2005-04-19 19:33:46	2005-04-19 22:00:00	1.59371	6	0	2005-04-19 18:00:00	2005-04-20 21:15:00	2005-04-21 20:00:00	13.225	105	32.5	7.66952e+06
634	2005-04-20 15:07:30	2005-04-20 16:06:15	2005-04-20 20:00:00	0.8	2	6	2005-04-20 16:00:00	2005-04-21 02:00:00	2005-04-21 06:00:00	55.5	112	96.25	940275
635	2005-05-14 00:15:00	2005-05-14 00:45:00	2005-05-14 05:00:00	0.325	0.8	34	2005-05-14 00:30:00	2005-05-14 00:30:00	2005-05-14 06:00:00	5.5	5.5	4.7	949.091
636	2005-05-24 10:06:00	2005-05-24 14:30:04	2005-05-24 20:00:00	2.90161	7.5	0.5	2005-05-24 13:00:00	2005-05-25 12:00:00	2005-05-25 15:00:00	270.75	479	378.5	3.31673e+06
637	2005-06-02 01:30:00	2005-06-02 02:00:00	2005-06-02 04:00:00	0.133333	0.4	8.5	2005-06-02 03:00:00	2005-06-03 03:15:00	2005-06-03 17:00:00	172	644	293	2.9262e+07
638	2005-06-02 10:03:31	2005-06-02 13:30:52	2005-06-02 16:00:00	6.7316	11.3	8.9	2005-06-02 11:00:00	2005-06-03 05:00:00	2005-06-03 17:00:00	406.75	653	293	1.53673e+07
639	2005-06-03 10:03:45	2005-06-03 16:29:57	2005-06-04 11:00:00	4.09812	32.2	20.2	2005-06-03 18:00:00	2005-06-04 16:00:00	2005-06-05 22:00:00	324.75	1720	1270	7.39187e+07
640	2005-06-16 11:30:00	2005-06-16 12:00:00	2005-06-16 14:00:00	0.125	0.3	5.4	2005-06-17 02:00:00	2005-06-17 11:30:00	2005-06-17 18:00:00	372	640	349.5	6.63943e+06
641	2005-06-22 11:00:36	2005-06-22 11:30:36	2005-06-22 14:00:00	9.907	10.9	0.3	2005-06-22 11:15:36	2005-06-22 11:30:00	2005-06-23 01:00:00	431	428	132.75	27875
642	2005-07-16 16:00:00	2005-07-16 18:33:44	2005-07-16 20:00:00	1.53747	2.3	3.6	2005-07-16 16:00:00	2005-07-17 18:45:00	2005-07-20 09:00:00	92.25	216	117	1.80945e+07
643	2005-07-26 09:07:30	2005-07-26 10:30:00	2005-07-26 14:00:00	0.999944	2.3	16.3	2005-07-26 10:00:00	2005-07-26 15:00:00	2005-07-27 01:00:00	96.25	153	89	1027020
644	2005-07-31 12:30:00	2005-07-31 13:00:00	2005-07-31 15:00:00	0.15	0.4	2.6	2005-07-31 12:45:00	2005-07-31 13:30:00	2005-07-31 21:00:00	58	58	20.75	148214
645	2005-08-01 12:07:30	2005-08-01 13:30:00	2005-08-01 16:00:00	2.6998	3.9	0.7	2005-08-01 13:00:00	2005-08-02 16:00:00	2005-08-02 22:00:00	49.5	54	34.25	358667
646	2005-08-01 22:00:00	2005-08-01 23:29:55	2005-08-02	0.133155	0.3	4.6	2005-08-02 02:00:00	2005-08-02 17:30:00	2005-08-02 22:00:00	34.25	58	34.25	399825
647	2005-08-02 16:02:00	2005-08-02 16:32:00	2005-08-02 22:00:00	2.90667	4	4.9	2005-08-02 17:00:00	2005-08-03 18:30:00	2005-08-06 10:00:00	57	111	58.75	1.62981e+07
648	2005-08-04 06:00:00	2005-08-04 07:30:01	2005-08-04 15:00:00	0.699901	2.3	9	2005-08-04 06:00:00	2005-08-05 13:00:00	2005-08-06 10:00:00	86.75	273	58.75	1.20239e+07
649	2005-08-10 12:00:52	2005-08-10 12:30:52	2005-08-10 14:00:00	6.7159	7.9	11.9	2005-08-10 14:00:00	2005-08-10 20:45:00	2005-08-12 12:00:00	54.25	86	59.5	2.91951e+06
650	2005-08-13 14:15:00	2005-08-13 16:30:00	2005-08-13 19:00:00	1.0999	3.6	21.2	2005-08-13 19:00:00	2005-08-14 13:45:00	2005-08-14 15:00:00	72	195	91	791426
651	2005-08-16 12:12:00	2005-08-16 13:29:59	2005-08-16 19:00:00	0.799979	1.8	5	2005-08-16 12:27:00	2005-08-16 12:30:00	2005-08-16 20:00:00	77	78	57.75	3082.5
652	2005-08-25 11:30:00	2005-08-25 12:29:57	2005-08-25 13:00:00	0.299933	0.5	0.1	2005-08-25 13:00:00	2005-08-25 14:15:00	2005-08-25 19:00:00	73.25	134	26	560812
653	2005-10-09 09:00:00	2005-10-09 16:30:02	2005-10-10 05:00:00	0.299936	2.9	21.3	2005-10-09 09:00:00	2005-10-10 08:45:00	2005-10-11 13:00:00	108	192	82	1.01361e+07
654	2006-02-28 22:00:00	2006-03-01 01:29:57	2006-03-01 05:00:00	0.499796	1.4	0	2006-03-01 11:00:00	2006-03-01 13:15:00	2006-03-01 16:00:00	6.425	15	6.425	31680
655	2006-03-12 05:30:00	2006-03-12 14:30:43	2006-03-13 05:00:00	1	6.3	3.8	2006-03-12 17:00:00	2006-03-13 09:30:00	2006-03-14 05:00:00	5.7	24	18.75	814905
656	2006-03-19 16:30:00	2006-03-19 19:58:39	2006-03-19 22:00:00	0.2	1	12.8	2006-03-19 17:00:00	2006-03-19 21:30:00	2006-03-20 06:00:00	35.25	40	32.25	69568.3
657	2006-03-30 03:00:00	2006-03-30 03:30:00	2006-03-30 05:00:00	0.1	0.3	13.9	2006-03-30 05:00:00	2006-03-30 11:30:00	2006-03-30 13:00:00	30.5	40	30	32189.1
658	2006-04-24 00:06:39	2006-04-24 01:29:57	2006-04-24 06:00:00	3.79773	9.6	0.1	2006-04-24 01:00:00	2006-04-25 02:15:00	2006-04-25 14:00:00	51.75	102	82.5	1.96455e+06
659	2006-05-19 12:30:00	2006-05-19 16:31:55	2006-05-19 18:00:00	3.10322	4.3	0.1	2006-05-20 03:00:00	2006-05-20 11:30:00	2006-05-21 01:00:00	454.5	1070	561	2.0101e+07
660	2006-05-22 12:05:27	2006-05-22 20:33:48	2006-05-23 03:00:00	1.58125	6	4.8	2006-05-22 13:00:00	2006-05-23 10:45:00	2006-05-23 18:00:00	436.75	898	662	6.89043e+06
661	2006-06-28 11:00:00	2006-06-28 12:29:55	2006-06-28 13:00:00	0.499866	1	3.5	2006-06-28 11:00:00	2006-06-28 18:00:00	2006-06-28 19:00:00	140.5	150	140.25	79924.2
662	2006-06-30 11:08:34	2006-06-30 11:38:34	2006-06-30 13:00:00	0.671389	1.2	4.5	2006-06-30 13:00:00	2006-06-30 13:15:00	2006-06-30 19:00:00	321.25	327	231.5	19181.2
663	2006-07-01 10:20:00	2006-07-01 13:30:01	2006-07-01 15:00:00	1.09981	2.1	2.3	2006-07-01 11:00:00	2006-07-02 14:30:00	2006-07-05 22:00:00	219.25	251	214.25	2.34859e+07
664	2006-07-02 09:30:00	2006-07-02 10:29:57	2006-07-02 15:00:00	0.799598	2.3	4.4	2006-07-02 10:00:00	2006-07-03 14:30:00	2006-07-05 16:00:00	237	271	227.75	1.82485e+07
665	2006-07-04 11:00:00	2006-07-04 13:29:56	2006-07-04 14:00:00	1.10284	1.3	8.4	2006-07-04 11:00:00	2006-07-04 16:45:00	2006-07-05 13:00:00	395.75	424	260.25	2.08845e+06
666	2006-07-06 12:30:00	2006-07-06 15:29:59	2006-07-06 16:00:00	0.416662	0.9	8.5	2006-07-06 15:00:00	2006-07-07 14:00:00	2006-07-07 21:00:00	271.5	289	269.25	450652
667	2006-07-07 13:00:00	2006-07-08 16:29:56	2006-07-09 16:00:00	2.3982	16.3	7.3	2006-07-07 13:00:00	2006-07-10 09:15:00	2006-07-10 18:00:00	282.25	450	271.5	7.62275e+06
668	2006-07-11 13:20:00	2006-07-11 14:29:58	2006-07-11 16:00:00	6.29801	7	17.2	2006-07-11 22:00:00	2006-07-12 11:45:00	2006-07-14 12:00:00	147	242	142.5	1.18314e+07
669	2006-07-18 11:30:00	2006-07-18 12:29:57	2006-07-18 18:00:00	0.399866	0.9	0	2006-07-18 12:00:00	2006-07-19 06:45:00	2006-07-19 10:00:00	140.25	302	126.25	1.43516e+06
670	2006-07-19 12:00:00	2006-07-19 12:30:00	2006-07-19 17:00:00	0.5	1.5	0.9	2006-07-19 14:00:00	2006-07-20 13:45:00	2006-07-20 15:00:00	112	181	88.75	1.14597e+06
671	2006-07-20 13:00:33	2006-07-20 13:30:33	2006-07-20 18:00:00	10.6004	12.5	2.4	2006-07-20 16:00:00	2006-07-20 20:45:00	2006-07-21 03:00:00	105.5	273	123	1.35193e+06
672	2006-08-15 16:00:55	2006-08-15 16:30:55	2006-08-15 18:00:00	6.40611	6.9	1.1	2006-08-15 17:00:00	2006-08-16 01:00:00	2006-08-16 18:00:00	42.75	67	10.75	1822158
673	2006-08-24 11:10:00	2006-08-24 12:29:59	2006-08-24 14:00:00	0.799999	1.5	7	2006-08-24 11:25:00	2006-08-24 11:30:00	2006-08-24 20:00:00	83	72	39	0
674	2006-08-25 10:00:00	2006-08-25 19:33:59	2006-08-26 05:00:00	1.43322	6	8.5	2006-08-25 10:00:00	2006-08-25 19:15:00	2006-08-26 08:00:00	54.5	199	77	1.14841e+06
675	2006-08-26 16:07:30	2006-08-26 16:37:30	2006-08-26 19:00:00	0.7375	1.3	11.6	2006-08-26 19:00:00	2006-08-27 03:45:00	2006-08-27 17:00:00	80	154	88.75	1.30338e+06
676	2006-09-06 17:00:57	2006-09-06 17:30:57	2006-09-06 19:00:00	6.21583	7.3	0	2006-09-06 17:15:57	2006-09-06 17:30:00	2006-09-07 02:00:00	33	32	26	2461.76
677	2006-09-08 11:00:00	2006-09-08 11:30:18	2006-09-08 23:00:00	0.4	2.3	7.3	2006-09-08 12:00:00	2006-09-09 22:30:00	2006-09-15 04:00:00	25.75	46	28	3.63611e+07
678	2006-09-10 12:05:27	2006-09-10 12:35:27	2006-09-10 15:00:00	1.01817	1.4	9.8	2006-09-10 13:00:00	2006-09-11 07:30:00	2006-09-12 08:00:00	112.5	163	121	3.66867e+06
679	2006-09-20 19:20:00	2006-09-20 21:29:59	2006-09-21	0.699997	2	1.4	2006-09-20 21:00:00	2006-09-21 22:45:00	2006-09-23 19:00:00	57.75	62	58	502284
680	2006-10-08 07:30:00	2006-10-08 08:00:00	2006-10-08 10:00:00	0.15	0.4	2.2	2006-10-08 09:00:00	2006-10-08 12:30:00	2006-10-08 20:00:00	39.5	41	32.5	86931.8
681	2006-10-09 08:06:00	2006-10-09 08:36:00	2006-10-09 15:00:00	0.903333	1.8	2.8	2006-10-09 09:00:00	2006-10-10 02:30:00	2006-10-13 18:00:00	36	69	42.75	5.09957e+06
682	2006-10-25 08:12:00	2006-10-25 12:29:57	2006-10-25 13:00:00	1.00214	1.6	4.8	2006-10-25 12:00:00	2006-10-26 13:00:00	2006-11-01 08:00:00	41	103	38.75	9.19737e+07
683	2006-10-25 23:00:00	2006-10-26 03:29:58	2006-10-26 10:00:00	5.0998	18.9	6.4	2006-10-26 01:00:00	2006-10-26 14:45:00	2006-11-01 08:00:00	54	138	38.75	87738300
684	2007-02-16 07:30:00	2007-02-16 12:30:02	2007-02-16 21:00:00	2.69935	14.7	0.9	2007-02-16 07:45:00	2007-02-16 07:45:00	2007-02-16 22:00:00	43	43	35	3363.16
685	2007-02-27 14:00:00	2007-02-27 18:30:04	2007-02-27 21:00:00	0.2	1	4.1	2007-02-27 15:00:00	2007-02-28 07:30:00	2007-02-28 12:00:00	36.25	54	42.5	306793
686	2007-03-24 08:20:00	2007-03-24 10:29:59	2007-03-24 14:00:00	1.7	5.6	8.8	2007-03-24 09:00:00	2007-03-25 04:15:00	2007-03-25 23:00:00	81.25	112	96.75	1.78868e+06
687	2007-03-26 19:06:00	2007-03-26 21:29:55	2007-03-26 22:00:00	1.49831	2.6	14.8	2007-03-26 22:00:00	2007-03-27 02:15:00	2007-03-27 04:00:00	104.25	121	116.75	72825
688	2007-04-17 16:00:00	2007-04-17 17:40:02	2007-04-17 20:00:00	0.549801	1.2	4.3	2007-04-17 16:00:00	2007-04-18 14:00:00	2007-04-18 16:00:00	60.5	78	71.5	24496.9
689	2007-04-18 19:30:00	2007-04-19 00:29:56	2007-04-19 01:00:00	0.20741	0.5	5.5	2007-04-18 20:00:00	2007-04-20 00:45:00	2007-04-20 17:00:00	74.25	79	60.5	1.56584e+06
690	2007-04-22 18:00:00	2007-04-22 18:30:00	2007-04-22 23:00:00	0.1	0.6	6.3	2007-04-22 22:00:00	2007-04-23 15:45:00	2007-04-23 20:00:00	68.75	77	69.75	191618
691	2007-04-30 13:02:43	2007-04-30 13:32:43	2007-04-30 15:00:00	2.13171	2.9	0	2007-05-01 03:00:00	2007-05-01 11:15:00	2007-05-01 13:00:00	4.425	13	3.1	39911.6
692	2007-05-03 15:03:09	2007-05-03 15:33:09	2007-05-03 17:00:00	1.80525	2	2.9	2007-05-03 18:00:00	2007-05-04 12:00:00	2007-05-04 22:00:00	134.25	414	133.25	3.23973e+06
693	2007-05-14 12:08:34	2007-05-14 17:30:02	2007-05-14 21:00:00	1.19976	6.2	2.5	2007-05-14 13:00:00	2007-05-15 06:15:00	2007-05-15 09:00:00	47.375	492	179.5	1.18658e+07
694	2007-05-17 09:05:27	2007-05-17 09:35:27	2007-05-17 15:00:00	1.04542	2.9	8.4	2007-05-17 23:00:00	2007-05-18 10:30:00	2007-05-19	160.75	450	302	9.7966e+06
695	2007-05-26 15:30:00	2007-05-26 16:29:57	2007-05-26 17:00:00	2.2986	2.5	1.8	2007-05-26 20:00:00	2007-05-27 09:45:00	2007-05-28	352.5	447	317	4.03036e+06
696	2007-05-30 04:30:00	2007-05-30 05:00:00	2007-05-30 07:00:00	0.125	0.3	10.1	2007-05-30 13:00:00	2007-05-30 14:30:00	2007-05-30 19:00:00	298.5	395	310.75	1.05998e+06
697	2007-05-30 18:20:00	2007-05-30 18:50:00	2007-05-30 20:00:00	0.233333	0.4	10.4	2007-05-30 20:00:00	2007-05-31 13:00:00	2007-05-31 22:00:00	316.5	537	230.5	6018750
698	2007-06-03 17:05:27	2007-06-03 17:35:27	2007-06-03 19:00:00	1.07267	1.9	9.1	2007-06-04 03:00:00	2007-06-04 09:00:00	2007-06-05	389	504	156.75	5.72256e+06
699	2007-06-04 11:30:00	2007-06-04 12:29:57	2007-06-04 17:00:00	2.39853	3.6	4	2007-06-05 01:00:00	2007-06-05 08:15:00	2007-06-05 13:00:00	272.5	615	390.5	4.97314e+06
700	2007-06-06 15:15:00	2007-06-06 15:45:00	2007-06-06 20:00:00	0.30625	0.5	6.9	2007-06-06 21:00:00	2007-06-07 13:00:00	2007-06-07 18:00:00	347	474	417.25	3.57432e+06
701	2007-06-12 03:30:00	2007-06-12 04:29:57	2007-06-12 08:00:00	1.699	2.9	0.5	2007-06-12 04:00:00	2007-06-13 06:15:00	2007-06-13 08:00:00	325.25	721	587.25	8.91834e+06
702	2007-07-03 14:15:00	2007-07-03 14:45:00	2007-07-03 16:00:00	0.325	0.5	1.3	2007-07-03 15:00:00	2007-07-03 21:30:00	2007-07-04 07:00:00	87.5	134	82.25	974925
703	2007-07-05 14:20:00	2007-07-05 15:29:58	2007-07-05 18:00:00	0.399966	0.8	0.5	2007-07-05 15:00:00	2007-07-06 13:45:00	2007-07-14 09:00:00	75	305	132.25	7.13662e+07
704	2007-07-07 15:06:00	2007-07-07 15:36:00	2007-07-07 21:00:00	0.91	1.6	1.3	2007-07-07 20:00:00	2007-07-07 21:30:00	2007-07-08 01:00:00	249	392	203	562500
705	2007-07-28 14:00:00	2007-07-28 17:29:57	2007-07-28 18:00:00	0.214111	0.5	13.2	2007-07-28 14:00:00	2007-07-29 10:45:00	2007-07-29 17:00:00	110.5	197	25.5	4.86312e+06
706	2007-07-29 14:02:18	2007-07-29 14:32:18	2007-07-29 16:00:00	2.61533	3.1	13.7	2007-07-29 14:17:18	2007-07-29 14:30:00	2007-07-29 17:00:00	62	58	25.5	1440
707	2007-08-02 14:20:00	2007-08-02 16:30:05	2007-08-02 18:00:00	2.19766	3.4	12.3	2007-08-02 15:00:00	2007-08-02 20:30:00	2007-08-03 06:00:00	122.25	512	169	3.92789e+06
708	2007-08-07 12:05:27	2007-08-07 14:29:58	2007-08-07 17:00:00	3.99929	9.3	21.2	2007-08-07 22:00:00	2007-08-08 13:30:00	2007-08-09 13:00:00	75.5	228	73.25	5.91933e+06
709	2007-08-13 10:30:00	2007-08-13 14:30:01	2007-08-13 18:00:00	0.499936	1.3	14.1	2007-08-13 11:00:00	2007-08-14 06:30:00	2007-08-16 17:00:00	73	145	61.25	1.73321e+07
710	2007-08-15 11:05:00	2007-08-15 11:35:00	2007-08-15 13:00:00	1.10833	1.3	7.4	2007-08-15 12:00:00	2007-08-15 15:45:00	2007-08-15 23:00:00	181.5	235	141.75	382884
711	2007-08-15 20:04:36	2007-08-15 20:34:36	2007-08-15 22:00:00	1.36917	2.4	8.7	2007-08-15 20:19:36	2007-08-15 20:30:00	2007-08-15 23:00:00	156	156	141.75	5985
712	2007-08-17 11:30:00	2007-08-17 13:30:04	2007-08-17 16:00:00	5.7928	10.4	11.1	2007-08-17 15:00:00	2007-08-17 21:00:00	2007-08-18 14:00:00	39.25	221	64.75	4.56431e+06
713	2007-09-03 11:07:30	2007-09-03 14:29:56	2007-09-03 21:00:00	2.19852	4.9	2.3	2007-09-03 16:00:00	2007-09-03 19:30:00	2007-09-04 02:00:00	16.5	203	19	1.32334e+06
714	2007-09-04 10:05:00	2007-09-04 10:35:00	2007-09-04 12:00:00	1.15837	1.9	7.2	2007-09-04 13:00:00	2007-09-04 13:30:00	2007-09-04 19:00:00	17.5	18	14	22593.8
715	2007-09-05 10:20:00	2007-09-05 10:50:00	2007-09-05 13:00:00	0.216667	0.4	8.9	2007-09-05 10:35:00	2007-09-05 11:15:00	2007-09-05 14:00:00	14	14	13	138.462
716	2007-09-05 18:02:13	2007-09-05 19:29:55	2007-09-06 02:00:00	4.09841	8.5	9.3	2007-09-05 18:17:13	2007-09-06 01:45:00	2007-09-07 03:00:00	13	13	12	57156.9
717	2007-09-16 11:30:00	2007-09-16 16:29:56	2007-09-17 08:00:00	3.29921	14.6	0.5	2007-09-16 11:45:00	2007-09-16 11:45:00	2007-09-17 17:00:00	11	10	5.7	50549.2
718	2007-10-06 19:30:00	2007-10-06 20:00:00	2007-10-06 22:00:00	0.133333	0.4	0	2007-10-06 19:45:00	2007-10-06 19:45:00	2007-10-07 03:00:00	12.1	12.1	9.28	11088
719	2007-10-13 11:12:00	2007-10-13 15:29:57	2007-10-15 01:00:00	4.29851	43.8	0	2007-10-13 13:00:00	2007-10-15 11:45:00	2007-10-15 14:00:00	43.6	246	32.525	1.02759e+07
720	2007-10-20 18:05:00	2007-10-20 19:30:00	2007-10-21 08:00:00	1.3999	7.4	1	2007-10-20 19:00:00	2007-10-22 03:30:00	2007-10-22 14:00:00	25.7	64.8	28.275	4.35718e+06
721	2008-03-30 17:12:00	2008-03-30 19:29:54	2008-03-30 23:00:00	2.89754	10.5	14.8	2008-03-30 22:00:00	2008-03-31 10:15:00	2008-03-31 13:00:00	13.05	152	34.35	422284
722	2008-03-31 11:20:00	2008-03-31 11:50:00	2008-03-31 13:00:00	0.233333	0.4	25.3	2008-03-31 14:00:00	2008-04-01 10:30:00	2008-04-01 19:00:00	36.05	55.4	29.775	812044
723	2008-04-06 14:00:00	2008-04-07 00:29:59	2008-04-07 09:00:00	0.999984	7.1	0.5	2008-04-06 22:00:00	2008-04-07 15:45:00	2008-04-08 01:00:00	31.975	40.8	28.9	581402
724	2008-05-21 21:12:00	2008-05-22 17:29:58	2008-05-22 20:00:00	7.79978	44.5	0.1	2008-05-22 01:00:00	2008-05-23 09:30:00	2008-05-23 12:00:00	235.25	927	377.75	2.15502e+07
725	2008-05-23 13:00:00	2008-05-23 14:29:55	2008-05-23 15:00:00	1.69813	2.1	44.6	2008-05-23 13:00:00	2008-05-23 19:45:00	2008-05-23 22:00:00	402	433	417	109050
726	2008-05-26 16:07:30	2008-05-26 16:37:30	2008-05-27 01:00:00	0.725	3.6	46.7	2008-05-26 17:00:00	2008-05-27 12:00:00	2008-05-27 14:00:00	319.5	904	627.25	5.94409e+06
727	2008-05-28 15:30:00	2008-05-28 16:29:57	2008-05-28 18:00:00	0.999464	1.6	5.7	2008-05-28 22:00:00	2008-05-29 08:00:00	2008-05-29 19:00:00	427.75	686	401	7.07179e+06
728	2008-06-04 11:30:00	2008-06-05 02:30:02	2008-06-05 15:00:00	4.29827	32	0.6	2008-06-04 22:00:00	2008-06-06 11:00:00	2008-06-09 11:00:00	297.5	1100	854.25	2.35538e+08
729	2008-06-18 13:00:52	2008-06-18 13:30:52	2008-06-18 18:00:00	6.80046	7.7	0	2008-06-18 13:15:52	2008-06-18 13:30:00	2008-06-19	921	887	312.25	1687.5
730	2008-06-23 12:08:34	2008-06-23 13:29:58	2008-06-23 20:00:00	3.39862	7.6	10.9	2008-06-23 13:00:00	2008-06-24 10:15:00	2008-06-24 20:00:00	276.5	611	383.25	7.68962e+06
731	2008-06-24 14:08:34	2008-06-24 15:29:58	2008-06-24 19:00:00	0.999846	2.3	10.8	2008-06-24 21:00:00	2008-06-25 07:30:00	2008-06-26	407.75	772	486	1.34988e+07
732	2008-06-25 18:06:00	2008-06-25 18:36:00	2008-06-25 20:00:00	0.92	1.2	18.7	2008-06-26 01:00:00	2008-06-26 09:15:00	2008-06-27	496	731	455.75	1.10206e+07
733	2008-07-01 12:20:00	2008-07-01 12:50:00	2008-07-01 17:00:00	0.208333	0.4	1.2	2008-07-01 12:35:00	2008-07-01 12:45:00	2008-07-02	562	562	385.25	1687.5
734	2008-07-02 13:00:00	2008-07-02 14:30:01	2008-07-02 18:00:00	2.7991	5	0.4	2008-07-02 16:00:00	2008-07-03 09:00:00	2008-07-04 02:00:00	488	741	381	1.16881e+07
735	2008-07-17 12:30:00	2008-07-17 13:00:00	2008-07-17 14:00:00	0.2	0.4	0	2008-07-17 14:00:00	2008-07-18 14:00:00	2008-07-19 04:00:00	55.15	76.3	38.525	1.35417e+06
736	2008-07-21 12:30:00	2008-07-21 13:00:00	2008-07-21 17:00:00	0.114286	0.4	0.4	2008-07-22	2008-07-22 12:45:00	2008-07-23 05:00:00	51.45	113	58.325	1.53053e+06
737	2008-07-25 12:30:00	2008-07-25 14:29:58	2008-07-25 15:00:00	0.59983	0.9	6.4	2008-07-25 13:00:00	2008-07-25 19:45:00	2008-07-26 08:00:00	129.25	159	123.5	914385
738	2008-08-03 13:01:16	2008-08-03 13:31:16	2008-08-03 15:00:00	4.70844	5.2	0.6	2008-08-03 15:00:00	2008-08-03 20:30:00	2008-08-04	54.525	98.7	54.725	408226
739	2008-08-06 14:01:06	2008-08-06 15:30:01	2008-08-06 21:00:00	6.29906	20.5	6.1	2008-08-06 15:00:00	2008-08-06 20:15:00	2008-08-07 11:00:00	62.825	167	63.675	2.72652e+06
740	2008-08-08 11:20:00	2008-08-08 12:29:58	2008-08-09 01:00:00	4.59857	9.4	26.6	2008-08-08 13:00:00	2008-08-08 13:45:00	2008-08-09 06:00:00	121.4	191	70.925	442744
741	2008-08-16 06:07:30	2008-08-16 09:30:02	2008-08-16 13:00:00	3.19777	7.5	24	2008-08-16 07:00:00	2008-08-16 13:15:00	2008-08-17	14.1	40.8	12.6	602355
742	2008-08-20 11:30:00	2008-08-20 14:29:59	2008-08-20 15:00:00	0.399997	0.8	27.1	2008-08-20 12:00:00	2008-08-21 12:15:00	2008-08-21 16:00:00	37.2	38.5	33.625	141240
743	2008-08-23 13:15:00	2008-08-23 14:29:59	2008-08-23 15:00:00	0.938868	1.4	0.8	2008-08-23 16:00:00	2008-08-24 14:00:00	2008-08-25 02:00:00	21.825	143	25.225	3.49221e+06
744	2008-08-31 13:00:00	2008-08-31 16:30:15	2008-08-31 18:00:00	0.6	2.1	1.2	2008-09-01 02:00:00	2008-09-01 12:45:00	2008-09-01 17:00:00	16.65	358	28.05	3831066
745	2008-09-04 18:06:39	2008-09-04 18:44:09	2008-09-05	1	3.8	2.3	2008-09-04 21:00:00	2008-09-05 15:00:00	2008-09-09 10:00:00	60.25	230	92.1	4.83938e+07
746	2008-09-11 15:07:30	2008-09-11 17:30:01	2008-09-12 14:00:00	3.39975	22.2	1	2008-09-11 16:00:00	2008-09-13 06:15:00	2008-09-14 21:00:00	72.25	163	74.95	1.13658e+07
747	2008-10-21 11:00:00	2008-10-21 14:34:16	2008-10-21 17:00:00	1.35693	3	6.1	2008-10-22 03:00:00	2008-10-22 04:45:00	2008-10-22 09:00:00	4.79	5.25	4.79	4140
748	2009-03-26 03:07:30	2009-03-26 04:29:54	2009-03-26 05:00:00	1.39905	2.2	2.1	2009-03-26 05:00:00	2009-03-27 02:30:00	2009-03-28 02:00:00	3.265	25.4	19.675	1.24507e+06
749	2009-03-29 15:04:36	2009-03-29 15:34:36	2009-03-29 17:00:00	1.323	1.7	2.2	2009-03-29 16:00:00	2009-03-30 07:30:00	2009-03-30 14:00:00	11.95	25.4	20.85	201751
750	2009-04-01 05:30:00	2009-04-01 13:29:59	2009-04-01 19:00:00	1.49997	4.9	2.1	2009-04-01 06:00:00	2009-04-01 06:15:00	2009-04-01 21:00:00	16.35	16.8	8.22	66190.5
751	2009-04-03 17:02:51	2009-04-03 20:30:00	2009-04-04 04:00:00	3.69994	17.5	7	2009-04-03 21:00:00	2009-04-04 23:45:00	2009-04-06 05:00:00	4.5675	25.4	12.75	2.10687e+06
752	2009-04-14 14:08:34	2009-04-14 15:29:58	2009-04-14 16:00:00	1.0998	1.8	13.4	2009-04-14 14:23:34	2009-04-14 14:30:00	2009-04-15 04:00:00	3.9	3.9	3.47	9503
753	2009-04-15 13:07:30	2009-04-15 19:29:54	2009-04-15 20:00:00	1.59923	3	13.1	2009-04-16 09:00:00	2009-04-16 20:00:00	2009-04-17 04:00:00	3.5775	19.4	13.95	381314
754	2009-05-30 12:01:30	2009-05-30 12:31:30	2009-05-30 14:00:00	3.94	5.6	37.2	2009-05-30 22:00:00	2009-05-31 10:15:00	2009-05-31 19:00:00	7.3175	239	59.2	5.09337e+06
755	2009-05-31 12:20:00	2009-05-31 21:30:02	2009-05-31 23:00:00	1.09968	4.1	5.9	2009-05-31 20:00:00	2009-06-01 10:30:00	2009-06-01 18:00:00	61.1	246	134.75	4.50111e+06
756	2009-06-01 10:00:00	2009-06-01 11:29:55	2009-06-01 12:00:00	0.224698	0.4	10	2009-06-01 10:00:00	2009-06-02 12:00:00	2009-06-03 20:00:00	244	1080	741	4.71227e+07
757	2009-06-02 23:00:00	2009-06-02 23:30:00	2009-06-03 03:00:00	0.3	0.9	20.6	2009-06-02 23:00:00	2009-06-03 08:45:00	2009-06-03 20:00:00	995	1320	741	4.81069e+06
758	2009-06-03 11:20:00	2009-06-03 16:29:57	2009-06-03 22:00:00	8.69636	15.5	21.5	2009-06-03 21:00:00	2009-06-04 10:15:00	2009-06-04 19:00:00	781	1110	885.25	8.59959e+06
759	2009-06-04 12:12:00	2009-06-04 13:29:59	2009-06-04 14:00:00	0.799979	1.3	36.7	2009-06-04 20:00:00	2009-06-05 08:15:00	2009-06-05 10:00:00	905.75	1150	1073.75	705712
760	2009-06-09 14:06:39	2009-06-09 14:36:39	2009-06-09 16:00:00	0.944333	1.4	7.8	2009-06-09 14:21:39	2009-06-09 14:30:00	2009-06-10 02:00:00	549	528	424.75	0
761	2009-06-16 13:30:00	2009-06-16 14:00:00	2009-06-16 15:00:00	0.15	0.3	4.8	2009-06-16 13:45:00	2009-06-16 14:00:00	2009-06-16 16:00:00	1010	1020	952.5	56675
762	2009-06-18 15:12:00	2009-06-18 16:29:59	2009-06-18 18:00:00	7.89949	10.4	1.8	2009-06-18 22:00:00	2009-06-19 10:00:00	2009-06-19 19:00:00	759	939	795.5	4.81646e+06
763	2009-06-20 15:15:00	2009-06-20 16:29:59	2009-06-20 18:00:00	1.99973	2.9	10.9	2009-06-20 19:00:00	2009-06-21 10:45:00	2009-06-21 14:00:00	1460	1770	1612.5	5.3203e+06
764	2009-06-23 13:20:00	2009-06-23 13:50:00	2009-06-23 15:00:00	0.233333	0.4	13.3	2009-06-23 16:00:00	2009-06-23 17:15:00	2009-06-23 21:00:00	1365	1430	1280	484875
765	2009-06-24 13:15:00	2009-06-24 15:44:56	2009-06-24 17:00:00	0.32498	0.9	13.7	2009-06-24 13:30:00	2009-06-24 13:30:00	2009-06-25 01:00:00	1150	1110	471.75	1.45824e+06
766	2009-06-26 12:15:00	2009-06-26 12:45:00	2009-06-26 14:00:00	0.375	0.7	4.4	2009-06-26 15:00:00	2009-06-27 10:30:00	2009-06-28 02:00:00	875.25	975	663.25	7.41413e+06
767	2009-07-02 14:01:13	2009-07-02 15:30:02	2009-07-03	11.0942	18.5	1.2	2009-07-02 14:16:13	2009-07-02 14:30:00	2009-07-03 01:00:00	414	414	139.25	763538
768	2009-07-04 10:30:00	2009-07-04 17:29:58	2009-07-04 18:00:00	5.79961	7.5	19.8	2009-07-04 15:00:00	2009-07-05 10:30:00	2009-07-07 06:00:00	252	696	217.5	3.72782e+07
769	2009-07-19 19:20:00	2009-07-19 19:50:00	2009-07-19 21:00:00	0.233333	0.4	0	2009-07-19 20:00:00	2009-07-19 20:30:00	2009-07-19 23:00:00	146.5	150	101.5	44775
770	2009-07-25 12:10:00	2009-07-25 12:40:00	2009-07-25 20:00:00	0.504167	1.2	2.3	2009-07-25 18:00:00	2009-07-26 01:30:00	2009-07-26 15:00:00	71.8	82.5	58.5	582435
771	2009-07-27 11:00:00	2009-07-27 17:29:55	2009-07-27 18:00:00	3.39623	8.5	3.1	2009-07-27 13:00:00	2009-07-28 12:00:00	2009-07-31 13:00:00	56.2	104	50.875	14259960
772	2009-07-28 13:12:00	2009-07-28 15:29:54	2009-07-28 16:00:00	2.19747	3.1	10.9	2009-07-28 18:00:00	2009-07-29 01:15:00	2009-07-29 09:00:00	73.825	120	71.8	525594
773	2009-07-29 11:05:27	2009-07-29 12:29:57	2009-07-29 14:00:00	2.69891	4.5	14.9	2009-07-29 12:00:00	2009-07-30 14:00:00	2009-07-31 13:00:00	73.375	147	50.875	9.16892e+06
774	2009-07-29 20:00:00	2009-07-29 21:29:55	2009-07-29 22:00:00	0.399732	0.7	18.4	2009-07-29 20:00:00	2009-07-30 18:45:00	2009-07-31 13:00:00	96.6	179	50.875	6.81902e+06
775	2009-08-14 06:00:00	2009-08-14 20:29:58	2009-08-14 21:00:00	2.29926	4.6	0	2009-08-14 06:00:00	2009-08-14 13:30:00	2009-08-14 22:00:00	33.65	230	33.475	1.66301e+06
776	2009-08-15 08:00:00	2009-08-15 16:33:39	2009-08-15 18:00:00	1.50614	2	4.6	2009-08-15 08:00:00	2009-08-16 13:30:00	2009-08-16 18:00:00	37.4	199	42.2	1.96059e+06
777	2009-08-24 12:12:00	2009-08-24 13:29:59	2009-08-24 14:00:00	3.17483	3.7	0.1	2009-08-24 14:00:00	2009-08-24 19:00:00	2009-08-25	39.15	80	39.3	720393
778	2009-08-24 20:03:31	2009-08-24 20:33:31	2009-08-24 22:00:00	1.62344	2.1	3.8	2009-08-24 20:18:31	2009-08-24 20:30:00	2009-08-25	62.2	56.2	39.3	0
779	2009-08-26 12:00:00	2009-08-26 15:29:57	2009-08-26 16:00:00	0.209816	0.4	10.1	2009-08-26 13:00:00	2009-08-27 11:45:00	2009-08-27 22:00:00	58.575	145	50	1.47124e+06
780	2009-09-06 10:30:00	2009-09-06 11:29:57	2009-09-06 12:00:00	1.19933	1.4	2.7	2009-09-06 11:00:00	2009-09-06 22:00:00	2009-09-07 03:00:00	46.4	175	48.8	1.51093e+06
781	2009-09-07 10:15:00	2009-09-07 12:36:37	2009-09-07 16:00:00	0.922117	2	4.1	2009-09-07 11:00:00	2009-09-07 13:15:00	2009-09-07 17:00:00	59.4	138	73.15	364333
782	2009-10-27 13:00:00	2009-10-27 16:30:03	2009-10-29 18:00:00	4.09887	21.3	0	2009-10-27 13:00:00	2009-10-30 11:00:00	2009-10-30 18:00:00	420.25	634	457.75	1.07005e+07
783	2010-03-31 13:00:00	2010-03-31 17:29:58	2010-03-31 19:00:00	0.39993	1.2	0	2010-03-31 13:00:00	2010-04-01 18:15:00	2010-04-02 20:00:00	44.65	88.3	71.2	2.11991e+06
784	2010-04-01 01:00:00	2010-04-01 11:30:05	2010-04-01 18:00:00	3.1982	12.2	1.2	2010-04-01 01:00:00	2010-04-01 23:15:00	2010-04-02 10:00:00	50.85	91.1	80.45	934432
785	2010-04-28 21:00:00	2010-04-28 23:30:02	2010-04-29 05:00:00	0.499868	1.8	12.7	2010-04-28 21:00:00	2010-04-29 06:30:00	2010-04-30 02:00:00	373	481	451.5	3.58641e+06
786	2010-05-11 09:00:00	2010-05-11 22:29:57	2010-05-12 06:00:00	2.79922	29.5	6.1	2010-05-11 09:00:00	2010-05-12 04:15:00	2010-05-13 05:00:00	202	414	359.5	1.07286e+07
787	2010-05-12 13:00:00	2010-05-12 15:28:50	2010-05-12 20:00:00	0.2	1.2	30	2010-05-12 13:15:00	2010-05-12 14:15:00	2010-05-13 05:00:00	395	398	359.5	242450
788	2010-05-14 14:00:00	2010-05-14 22:29:57	2010-05-15 12:00:00	1.19965	6.4	31.2	2010-05-14 14:00:00	2010-05-16 11:00:00	2010-05-17 23:00:00	426.25	933	581.25	8.39454e+07
789	2010-05-18 11:20:00	2010-05-18 14:30:01	2010-05-19 01:00:00	0.999903	7.1	7.6	2010-05-18 13:00:00	2010-05-19 19:00:00	2010-05-20 09:00:00	877.75	1120	1055	5.15313e+06
790	2010-05-24 11:30:00	2010-05-24 12:00:00	2010-05-24 14:00:00	0.15	0.4	0	2010-05-24 11:45:00	2010-05-24 11:45:00	2010-05-24 18:00:00	1640	1650	1560	163260
791	2010-05-26 14:00:00	2010-05-26 16:29:56	2010-05-26 17:00:00	0.310752	0.5	0.4	2010-05-26 14:00:00	2010-05-27 10:45:00	2010-05-27 20:00:00	1175	1500	1047.5	1.77169e+07
792	2010-06-06 14:20:00	2010-06-06 14:50:00	2010-06-06 18:00:00	0.266667	0.6	0	2010-06-06 17:00:00	2010-06-07 08:45:00	2010-06-07 21:00:00	2030	3080	2057.5	3.92647e+07
793	2010-06-07 19:15:00	2010-06-07 19:45:00	2010-06-07 22:00:00	0.375	0.9	1.2	2010-06-07 22:00:00	2010-06-08 08:30:00	2010-06-09	2225	3350	2217.5	5.19146e+07
794	2010-06-09 11:00:00	2010-06-09 13:29:56	2010-06-09 14:00:00	0.908173	1.2	2.7	2010-06-09 23:00:00	2010-06-10 07:15:00	2010-06-10 18:00:00	2040	2480	2060	1.41672e+07
795	2010-06-10 13:07:30	2010-06-10 13:37:30	2010-06-10 15:00:00	0.75	1.2	3.9	2010-06-10 13:22:30	2010-06-10 13:30:00	2010-06-10 18:00:00	2240	2260	2060	108000
796	2010-06-11 13:12:00	2010-06-11 21:30:02	2010-06-13 19:00:00	6.99913	52.5	5.1	2010-06-11 20:00:00	2010-06-12 13:30:00	2010-06-13 21:00:00	1870	4570	3392.5	1.37533e+08
797	2010-07-04 15:20:00	2010-07-04 16:29:58	2010-07-04 17:00:00	0.999764	1.3	7.3	2010-07-04 19:00:00	2010-07-05 11:00:00	2010-07-06 15:00:00	101.55	347	3.32	1.11761e+07
798	2010-07-07 13:00:00	2010-07-07 20:30:02	2010-07-08	1.39962	4.2	12.7	2010-07-07 13:00:00	2010-07-08 16:15:00	2010-07-10 23:00:00	202	659	267.5	6.7662e+07
799	2010-07-08 09:00:00	2010-07-08 14:29:59	2010-07-08 19:00:00	0.399996	2.1	16.9	2010-07-08 09:00:00	2010-07-09 09:30:00	2010-07-11 18:00:00	123.25	684	204	9.20258e+07
800	2010-07-29 12:15:00	2010-07-29 19:29:54	2010-07-29 20:00:00	0.499541	2	5.7	2010-07-29 19:00:00	2010-07-30 14:00:00	2010-07-30 22:00:00	97.525	191	109.75	1800445
801	2010-07-30 14:03:19	2010-07-30 15:29:55	2010-07-30 16:00:00	3.09809	4.9	7.7	2010-07-30 18:00:00	2010-07-31 13:15:00	2010-07-31 23:00:00	158	187	143	942463
802	2010-08-02 11:05:27	2010-08-02 12:29:57	2010-08-02 17:00:00	6.996	9.6	16.6	2010-08-02 12:00:00	2010-08-02 12:45:00	2010-08-02 21:00:00	292.25	299	213	79993.8
803	2010-08-04 13:02:13	2010-08-04 13:32:13	2010-08-04 15:00:00	2.64819	4.1	19.5	2010-08-04 15:00:00	2010-08-04 20:45:00	2010-08-05 04:00:00	183.5	204	181.5	564940
804	2010-08-06 12:00:00	2010-08-06 14:29:56	2010-08-06 15:00:00	5.19689	7.1	18.9	2010-08-06 14:00:00	2010-08-06 14:30:00	2010-08-06 17:00:00	200.25	206	159	20587.5
805	2010-08-09 06:00:00	2010-08-09 13:30:02	2010-08-09 17:00:00	9.49782	18.1	13.2	2010-08-09 10:00:00	2010-08-10 01:30:00	2010-08-10 07:00:00	76.55	144	85.85	830594
806	2010-08-19 06:30:00	2010-08-19 14:29:59	2010-08-19 16:00:00	0.399994	1.1	2.9	2010-08-19 14:00:00	2010-08-20 13:00:00	2010-08-21	37.55	189	62.025	1.48072e+06
807	2010-09-08 13:30:00	2010-09-08 15:30:04	2010-09-08 17:00:00	1.39933	2.7	0.4	2010-09-08 14:00:00	2010-09-08 19:00:00	2010-09-08 23:00:00	79.8	96.8	38.2	517530
808	2010-10-05 22:00:00	2010-10-06 01:29:57	2010-10-06 03:00:00	2.19987	4.9	0	2010-10-05 23:00:00	2010-10-06 10:30:00	2010-10-06 12:00:00	116.25	179	91.1	946934
809	2010-10-22 12:04:00	2010-10-22 17:29:59	2010-10-23 04:00:00	5.89914	16.8	11.8	2010-10-22 13:00:00	2010-10-24 00:15:00	2010-10-31 21:00:00	107	125	54	8.4048e+07
810	2010-10-25 01:01:39	2010-10-25 01:31:39	2010-10-25 11:00:00	3.61375	6.9	16.8	2010-10-25 03:00:00	2010-10-26 09:45:00	2010-10-31 21:00:00	121.25	148	54	7.22467e+07
811	2010-10-25 17:30:00	2010-10-25 19:29:58	2010-10-25 22:00:00	0.199966	0.7	23.7	2010-10-25 19:00:00	2010-10-26 14:30:00	2010-10-27 10:00:00	128	181	128.25	2.29042e+06
812	2010-11-28 14:00:00	2010-11-28 18:29:58	2010-11-29 11:00:00	0.499895	4.4	1.9	2010-11-28 16:00:00	2010-11-30 10:00:00	2010-11-30 12:00:00	17.875	48.8	35.6	687218
813	2010-12-19 19:00:00	2010-12-20 06:30:01	2010-12-20 10:00:00	0.599971	3.3	2.5	2010-12-19 21:00:00	2010-12-20 04:00:00	2010-12-20 11:00:00	30.15	122	89.275	797083
814	2011-01-17 04:00:00	2011-01-17 07:29:57	2011-01-17 22:00:00	0.399864	1.8	0	2011-01-17 04:00:00	2011-01-17 18:30:00	2011-01-18 01:00:00	29.75	62.9	54	309654
815	2011-02-24 13:30:00	2011-02-24 22:29:55	2011-02-25 18:00:00	1.49951	10.5	4.8	2011-02-24 13:45:00	2011-02-24 13:45:00	2011-02-25 19:00:00	24.3	23.6	20.3	28402.3
816	2011-02-26 06:00:00	2011-02-26 12:30:01	2011-02-26 14:00:00	1.19994	2.9	10.5	2011-02-26 06:00:00	2011-02-27 07:30:00	2011-02-27 14:00:00	21.6	27.1	22.125	86597.9
817	2011-04-09 16:20:00	2011-04-09 20:30:02	2011-04-09 23:00:00	0.799739	2.6	1.5	2011-04-09 16:35:00	2011-04-09 16:45:00	2011-04-10 01:00:00	12.5	12.5	7.19	79.3636
818	2011-04-13 18:04:00	2011-04-13 20:30:01	2011-04-14 08:00:00	3.39904	14.5	2.6	2011-04-13 21:00:00	2011-04-14 16:15:00	2011-04-15 07:00:00	5.9575	302	39.3	4.49739e+06
819	2011-04-14 21:00:00	2011-04-14 21:30:00	2011-04-14 23:00:00	0.1	0.3	17.1	2011-04-14 21:15:00	2011-04-14 21:15:00	2011-04-15 07:00:00	98.3	89.6	39.3	405
820	2011-05-02 11:30:00	2011-05-02 15:30:01	2011-05-02 18:00:00	0.499968	1.7	2.9	2011-05-02 16:00:00	2011-05-03 01:15:00	2011-05-03 10:00:00	22.425	27.9	19.85	147340
821	2011-05-28 02:20:00	2011-05-28 03:29:58	2011-05-28 18:00:00	0.499933	3.1	35.7	2011-05-28 02:35:00	2011-05-28 02:45:00	2011-05-28 20:00:00	643	643	286.75	2.07908e+06
822	2011-06-17 18:15:00	2011-06-17 18:45:00	2011-06-17 21:00:00	0.3125	0.5	6.1	2011-06-17 19:00:00	2011-06-18 07:30:00	2011-06-18 12:00:00	2117.5	2560	2297.5	5.53679e+06
823	2011-06-19 12:00:00	2011-06-19 12:30:00	2011-06-20 15:00:00	5.8	22.4	6.9	2011-06-19 16:00:00	2011-06-20 14:00:00	2011-06-20 21:00:00	2102.5	2490	2235	4.83795e+06
824	2011-06-29 16:30:00	2011-06-29 17:00:00	2011-06-29 18:00:00	0.15	0.3	0	2011-06-29 23:00:00	2011-06-30 08:30:00	2011-06-30 12:00:00	1645	2360	2062.5	1.01958e+07
825	2011-07-08 14:00:00	2011-07-08 14:30:00	2011-07-08 20:00:00	0.1	0.6	30.5	2011-07-08 15:00:00	2011-07-09 10:00:00	2011-07-09 23:00:00	1432.5	2210	1522.5	2.74653e+07
826	2011-07-11 10:00:00	2011-07-11 12:30:02	2011-07-11 16:00:00	1.10766	1.6	31.7	2011-07-11 10:00:00	2011-07-11 13:30:00	2011-07-12 01:00:00	1457.5	1560	1150	2.77965e+06
827	2011-07-12 13:20:00	2011-07-12 20:30:05	2011-07-13 03:00:00	2.19687	7.5	24.1	2011-07-12 23:00:00	2011-07-13 12:45:00	2011-07-16 13:00:00	1262.5	2400	1517.5	1.74418e+08
828	2011-07-13 18:00:00	2011-07-13 20:29:56	2011-07-13 21:00:00	2.49778	3	11.7	2011-07-13 19:00:00	2011-07-14 09:45:00	2011-07-14 13:00:00	2172.5	2250	2142.5	1287000
829	2011-07-16 12:15:00	2011-07-16 14:30:00	2011-07-16 20:00:00	0.79988	1.7	13.4	2011-07-16 12:30:00	2011-07-16 12:30:00	2011-07-16 22:00:00	1570	1580	1360	286816
830	2011-07-19 18:20:00	2011-07-19 18:50:00	2011-07-19 20:00:00	0.233333	0.4	6.6	2011-07-19 19:00:00	2011-07-19 19:15:00	2011-07-19 21:00:00	1397.5	1430	1362.5	58500
831	2011-08-26 11:05:00	2011-08-26 11:35:00	2011-08-26 13:00:00	1.125	1.5	6.4	2011-08-26 13:00:00	2011-08-26 19:00:00	2011-08-27 04:00:00	74.35	150	88.95	570666
832	2011-08-27 06:00:00	2011-08-27 16:29:59	2011-08-27 17:00:00	0.399992	1.3	6.4	2011-08-27 08:00:00	2011-08-27 09:45:00	2011-08-28 11:00:00	94.3	128	74.05	480712
833	2011-08-28 13:00:00	2011-08-28 14:33:43	2011-08-28 16:00:00	1.55608	2.7	7.8	2011-08-28 13:00:00	2011-08-29 16:00:00	2011-08-31 22:00:00	113.45	206	133.5	1.30655e+07
834	2011-09-06 06:00:00	2011-09-07 07:30:05	2011-09-07 12:00:00	2.19921	19.5	1.7	2011-09-06 06:00:00	2011-09-07 12:30:00	2011-09-10 18:00:00	81.125	404	143.75	3.45285e+07
835	2011-10-04 17:00:00	2011-10-04 19:29:56	2011-10-04 20:00:00	0.199899	0.5	1.3	2011-10-04 17:15:00	2011-10-04 17:45:00	2011-10-04 21:00:00	5.35	5.35	5.1025	690.525
836	2011-10-06 10:00:00	2011-10-06 13:29:57	2011-10-06 14:00:00	0.699559	1.1	1.9	2011-10-06 10:00:00	2011-10-07 13:15:00	2011-10-08 07:00:00	10.525	96.8	28.05	2.90688e+06
837	2011-10-11 16:30:00	2011-10-11 17:00:00	2011-10-11 23:00:00	0.15	0.6	4.1	2011-10-11 23:00:00	2011-10-12 09:45:00	2011-10-12 12:00:00	14	296	57.225	769483
838	2011-10-25 13:06:00	2011-10-25 17:29:58	2011-10-26 15:00:00	2.29904	23.1	0	2011-10-25 15:00:00	2011-10-26 15:30:00	2011-10-27 16:00:00	61	130	73	3.57336e+06
839	2011-11-01 14:15:00	2011-11-01 20:29:59	2011-11-02 08:00:00	3.39971	21	0	2011-11-01 21:00:00	2011-11-02 20:15:00	2011-11-03 15:00:00	101.75	131	70.375	1.63427e+06
840	2011-11-13 12:30:00	2011-11-13 17:38:33	2011-11-13 20:00:00	0.614276	1.9	2.3	2011-11-13 13:00:00	2011-11-13 14:45:00	2011-11-13 21:00:00	91.6	92.8	72.7	47804.1
841	2011-11-19 02:00:00	2011-11-19 02:30:00	2011-11-19 07:00:00	1	2.2	1.9	2011-11-19 06:00:00	2011-11-19 18:15:00	2011-11-20 05:00:00	85.875	95.4	75.4	626039
842	2011-11-25 16:00:00	2011-11-25 16:30:00	2011-11-26 02:00:00	0.4	1.2	0.6	2011-11-25 16:15:00	2011-11-25 16:30:00	2011-11-26 06:00:00	98	98	68.325	12882.3
843	2011-11-30 20:20:00	2011-12-01 02:29:58	2011-12-01 08:00:00	1.69993	12.4	1.2	2011-11-30 23:00:00	2011-12-01 23:15:00	2011-12-02 10:00:00	76	89	52.475	1.71461e+06
844	2011-12-29 08:20:00	2011-12-29 10:29:59	2011-12-29 12:00:00	0.699998	1.6	0	2011-12-29 09:00:00	2011-12-29 21:00:00	2011-12-30 05:00:00	65.45	77.8	70.975	289411
845	2012-01-07 11:00:00	2012-01-07 11:30:00	2012-01-07 17:00:00	0.1	0.6	0	2012-01-07 13:00:00	2012-01-07 15:30:00	2012-01-07 18:00:00	62.875	75.4	69.5	70925.6
846	2012-01-22 05:20:00	2012-01-22 07:29:59	2012-01-22 10:00:00	0.499999	1.7	2.7	2012-01-22 07:00:00	2012-01-22 12:15:00	2012-01-22 20:00:00	39.35	47.5	45	103934
847	2012-02-28 08:00:00	2012-02-28 13:29:59	2012-02-28 16:00:00	0.199997	0.8	0	2012-02-28 11:00:00	2012-02-28 22:30:00	2012-02-29 09:00:00	34.125	37.6	29.625	135059
848	2012-03-01 02:00:00	2012-03-01 03:30:01	2012-03-01 05:00:00	0.399934	1	0.8	2012-03-01 04:00:00	2012-03-01 20:45:00	2012-03-02 03:00:00	34.575	37.6	36.025	24821.9
849	2012-04-25 17:00:00	2012-04-25 18:30:01	2012-04-25 20:00:00	0.199967	0.5	1.7	2012-04-25 17:00:00	2012-04-25 18:30:00	2012-04-26 09:00:00	173	180	49.05	355487
850	2012-04-26 13:00:00	2012-04-26 22:30:04	2012-04-27 03:00:00	2.69674	7.3	2.4	2012-04-26 13:00:00	2012-04-27 18:30:00	2012-04-27 21:00:00	60.125	219	169.5	1.79968e+06
851	2012-05-01 17:00:00	2012-05-01 21:38:29	2012-05-01 23:00:00	0.628348	1	7.6	2012-05-02 05:00:00	2012-05-02 15:00:00	2012-05-03 04:00:00	98.35	205	109.5	3.67157e+06
852	2012-05-11 10:20:00	2012-05-11 15:36:28	2012-05-11 20:00:00	1	3	11.2	2012-05-11 11:00:00	2012-05-11 16:00:00	2012-05-12 06:00:00	175	462	208	6.56049e+06
853	2012-05-12 13:30:00	2012-05-12 15:29:58	2012-05-12 19:00:00	1.09983	3.2	14.2	2012-05-12 14:00:00	2012-05-13 14:30:00	2012-05-14 04:00:00	213	259	199	1.7386e+06
854	2012-05-16 11:15:00	2012-05-16 14:29:55	2012-05-16 15:00:00	0.599351	1.1	6.7	2012-05-16 12:00:00	2012-05-16 14:45:00	2012-05-17 07:00:00	307.25	338	178.5	845731
855	2012-05-17 15:00:00	2012-05-17 17:29:56	2012-05-17 18:00:00	0.119838	0.3	4.3	2012-05-18 02:00:00	2012-05-18 12:45:00	2012-05-19 04:00:00	196	542	379.75	9.05351e+06
856	2012-05-19 15:00:00	2012-05-19 17:29:56	2012-05-19 19:00:00	1.0997	3	7.5	2012-05-19 15:00:00	2012-05-19 15:15:00	2012-05-20 01:00:00	466.75	469	204.5	1.80654e+06
857	2012-06-02 10:30:00	2012-06-02 16:32:09	2012-06-02 18:00:00	2.73831	6.3	0.9	2012-06-02 13:00:00	2012-06-03 10:45:00	2012-06-04 02:00:00	217	299	125.75	3.92785e+06
858	2012-07-03 14:12:00	2012-07-03 14:42:00	2012-07-03 20:00:00	0.44	0.9	8	2012-07-03 15:00:00	2012-07-04 09:30:00	2012-07-04 14:00:00	77.5	96.7	80.3	360162
859	2012-07-04 21:06:39	2012-07-04 22:29:57	2012-07-04 23:00:00	3.99759	4.9	2.4	2012-07-04 22:00:00	2012-07-05 10:45:00	2012-07-05 12:00:00	71.55	107	54.65	716800
860	2012-07-05 12:00:00	2012-07-05 17:29:59	2012-07-05 19:00:00	1.09998	2.4	7.3	2012-07-05 13:00:00	2012-07-06 13:30:00	2012-07-10 11:00:00	67.825	302	121.75	7.0241e+07
861	2012-07-06 10:08:34	2012-07-06 11:30:04	2012-07-07 06:00:00	14.9993	58.5	9.4	2012-07-06 11:00:00	2012-07-07 04:15:00	2012-07-07 16:00:00	122.75	591	221.5	1.86128e+07
862	2012-07-07 12:00:00	2012-07-07 16:30:04	2012-07-07 22:00:00	3.89949	12.9	67.7	2012-07-07 17:00:00	2012-07-08 01:45:00	2012-07-08 08:00:00	223	566	201.75	9.26809e+06
863	2012-07-08 15:03:19	2012-07-08 16:29:55	2012-07-08 18:00:00	2.09927	4	79.6	2012-07-08 18:00:00	2012-07-08 20:45:00	2012-07-09 07:00:00	246.5	437	205.75	4.89816e+06
864	2012-07-15 13:15:00	2012-07-15 14:29:59	2012-07-15 15:00:00	12.198	12.6	0.3	2012-07-15 20:00:00	2012-07-15 21:00:00	2012-07-15 23:00:00	113.925	225	50.35	484770
865	2012-07-16 11:00:00	2012-07-16 12:53:03	2012-07-16 16:00:00	0.4	1.6	12.9	2012-07-16 15:00:00	2012-07-17 02:00:00	2012-07-17 11:00:00	17.7225	386	35.2	8.18218e+06
866	2012-07-25 11:30:00	2012-07-25 16:30:02	2012-07-25 18:00:00	1.39948	2.7	16	2012-07-25 12:00:00	2012-07-25 23:00:00	2012-07-26 17:00:00	112.25	217	73.3	5.33235e+06
867	2012-07-28 17:30:00	2012-07-28 18:00:00	2012-07-28 19:00:00	0.15	0.3	12.7	2012-07-28 22:00:00	2012-07-29	2012-07-29 11:00:00	31.875	118	10.3	561183
868	2012-07-29 14:02:18	2012-07-29 16:30:02	2012-07-29 20:00:00	12.0008	14.9	11.8	2012-07-29 16:00:00	2012-07-30 01:45:00	2012-07-30 14:00:00	69	764	187.75	1.67817e+07
869	2012-07-30 12:30:00	2012-07-30 14:29:58	2012-07-30 20:00:00	3.49898	6.8	18	2012-07-30 15:00:00	2012-07-31 10:30:00	2012-08-01 09:00:00	194.25	603	187	7.44994e+06
870	2012-08-01 13:00:00	2012-08-01 13:30:00	2012-08-01 17:00:00	0.3	0.7	22.1	2012-08-01 13:00:00	2012-08-01 20:00:00	2012-08-01 23:00:00	197	542	279.75	1.48456e+06
871	2012-08-10 17:06:39	2012-08-10 17:36:39	2012-08-10 19:00:00	0.9665	1.6	6.4	2012-08-10 18:00:00	2012-08-10 18:45:00	2012-08-11 06:00:00	63.175	66	45.25	127796
872	2012-08-16 12:20:00	2012-08-16 12:50:00	2012-08-16 14:00:00	0.233333	0.4	1.8	2012-08-16 13:00:00	2012-08-16 13:15:00	2012-08-16 17:00:00	260	293	192	90450
873	2012-08-27 12:12:00	2012-08-27 14:30:00	2012-08-27 16:00:00	1.49966	2.5	2.1	2012-08-27 14:00:00	2012-08-27 15:45:00	2012-08-27 21:00:00	119	124	97.35	114210
874	2012-08-28 11:01:37	2012-08-28 11:31:37	2012-08-28 14:00:00	3.64874	5.7	4.6	2012-08-28 15:00:00	2012-08-29 07:00:00	2012-08-29 22:00:00	86.8	98	89	539325
875	2012-08-30 10:30:00	2012-08-30 13:29:59	2012-08-30 14:00:00	0.399997	0.8	8.3	2012-08-30 14:00:00	2012-08-30 14:15:00	2012-08-30 23:00:00	207.5	221	75.4	35205
876	2012-09-01 14:00:00	2012-09-01 15:30:01	2012-09-01 20:00:00	1.40623	3	9.1	2012-09-01 14:00:00	2012-09-02 20:00:00	2012-09-06	54.1	163	70.95	2.69601e+07
877	2012-09-06 23:30:00	2012-09-07 00:30:03	2012-09-07 02:00:00	0.3999	0.9	6.2	2012-09-06 23:45:00	2012-09-06 23:45:00	2012-09-07 03:00:00	42.5	41.5	40.5	553.846
878	2012-09-11 11:15:00	2012-09-11 18:30:00	2012-09-12 10:00:00	2.19994	11.2	1	2012-09-11 19:00:00	2012-09-12 14:00:00	2012-09-16 16:00:00	16.1	175	53.8	1.49691e+07
879	2012-10-12 13:12:00	2012-10-12 21:30:02	2012-10-13 12:00:00	1.19989	5.1	0	2012-10-13	2012-10-13 12:30:00	2012-10-14	21.725	30.3	17.4	339868
880	2012-10-16 16:30:00	2012-10-16 19:30:05	2012-10-16 21:00:00	1.39866	2.9	6.4	2012-10-16 17:00:00	2012-10-17 15:00:00	2012-10-17 18:00:00	40.55	741	40.325	3.20168e+06
881	2012-10-24 10:00:00	2012-10-24 17:30:02	2012-10-26 02:00:00	1.89961	15.2	0	2012-10-24 11:00:00	2012-10-24 11:15:00	2012-10-26 03:00:00	108.425	130	34.8	98467.7
882	2012-10-27 10:00:00	2012-10-27 11:30:01	2012-10-27 14:00:00	0.999966	2.6	15.2	2012-10-27 10:00:00	2012-10-27 17:00:00	2012-10-30 19:00:00	96.375	125	96.375	5.92459e+06
883	2012-12-14 18:30:00	2012-12-14 19:29:57	2012-12-14 20:00:00	0.299933	0.5	0.2	2012-12-14 18:45:00	2012-12-14 23:00:00	2012-12-15 06:00:00	4.17	4.62	4.17	9720
884	2013-05-11 10:00:00	2013-05-11 12:29:56	2013-05-11 16:00:00	0.699597	2.3	24.1	2013-05-11 10:00:00	2013-05-11 11:00:00	2013-05-12 04:00:00	164	166	84.9	845336
885	2013-05-14 14:06:00	2013-05-14 14:36:00	2013-05-14 16:00:00	0.91	1.1	2.9	2013-05-14 15:00:00	2013-05-15 11:00:00	2013-05-15 12:00:00	427	818	559	1.54247e+06
886	2013-05-29 01:00:00	2013-05-29 06:29:59	2013-05-29 10:00:00	2.69995	9.5	0.7	2013-05-29 02:00:00	2013-05-29 09:15:00	2013-05-29 20:00:00	268	655	189	1.41146e+07
887	2013-07-01 14:00:00	2013-07-01 20:29:55	2013-07-01 21:00:00	8.29116	8.9	1.3	2013-07-01 15:00:00	2013-07-01 15:15:00	2013-07-02 01:00:00	61.225	63.7	26.65	12372.8
888	2013-07-05 13:00:00	2013-07-05 13:30:00	2013-07-05 16:00:00	1.4	1.6	10.2	2013-07-05 15:00:00	2013-07-06 10:15:00	2013-07-06 19:00:00	65.625	311	106.5	4.41661e+06
889	2013-07-12 11:07:30	2013-07-12 14:29:56	2013-07-12 17:00:00	2.4987	8.3	1.2	2013-07-12 15:00:00	2013-07-12 20:45:00	2013-07-13 10:00:00	66.025	335	127	3.29756e+06
890	2013-07-14 22:08:34	2013-07-14 22:38:34	2013-07-15 03:00:00	0.605711	1	11	2013-07-14 23:00:00	2013-07-15 05:45:00	2013-07-15 18:00:00	94.125	255	83.025	3.82366e+06
891	2013-07-18 12:20:00	2013-07-18 16:30:02	2013-07-18 22:00:00	2.49838	5.1	2.9	2013-07-18 13:00:00	2013-07-18 19:15:00	2013-07-19 09:00:00	96.7	499	88.425	7.63932e+06
892	2013-07-19 18:15:00	2013-07-19 18:45:00	2013-07-19 20:00:00	0.35	0.6	6.8	2013-07-19 18:30:00	2013-07-19 18:30:00	2013-07-19 23:00:00	84	79	50.625	5606.25
893	2013-07-20 11:00:43	2013-07-20 11:30:43	2013-07-20 14:00:00	8.10119	11.7	6.7	2013-07-20 20:00:00	2013-07-21 13:00:00	2013-07-23 19:00:00	12.5025	147	17.225	1.85663e+07
894	2013-07-28 06:00:00	2013-07-28 15:30:04	2013-07-28 17:00:00	1.89778	5.4	8	2013-07-28 07:00:00	2013-07-28 22:45:00	2013-07-29 12:00:00	42.25	550	139.75	6.64343e+06
895	2013-09-06 12:08:34	2013-09-06 12:38:34	2013-09-06 14:00:00	0.657111	1.1	13.6	2013-09-06 14:00:00	2013-09-06 20:45:00	2013-09-07 13:00:00	43.275	538	60.95	7.04928e+06
896	2013-09-08 11:00:00	2013-09-08 13:29:56	2013-09-08 23:00:00	0.399899	2.3	15	2013-09-08 15:00:00	2013-09-08 20:15:00	2013-09-09	77.725	288	101.75	1.89105e+06
897	2013-11-15 15:12:00	2013-11-15 16:42:13	2013-11-15 21:00:00	0.5	2.4	0	2013-11-15 16:00:00	2013-11-16 09:00:00	2013-11-17 03:00:00	194	210	189	1258650
898	2013-11-16 17:00:00	2013-11-16 21:29:58	2013-11-17 05:00:00	0.79993	3.9	2.4	2013-11-16 18:00:00	2013-11-17 14:15:00	2013-11-17 22:00:00	208.5	223	181.5	1.00041e+06
899	2014-02-23 00:30:00	2014-02-23 01:30:03	2014-02-23 03:00:00	0.5998	1.2	5	2014-02-23 01:00:00	2014-02-23 01:45:00	2014-02-23 11:00:00	117.5	119	97.75	38880
900	2014-02-25 12:30:00	2014-02-25 16:30:01	2014-02-25 20:00:00	3.49967	12.4	6.2	2014-02-25 13:00:00	2014-02-26 02:00:00	2014-02-26 06:00:00	107.25	134	117.5	267853
901	2014-03-07 05:20:00	2014-03-07 13:30:01	2014-03-07 19:00:00	1.69973	11.7	9	2014-03-07 06:00:00	2014-03-07 18:15:00	2014-03-08 15:00:00	140	191	152.75	2.69147e+06
902	2014-03-27 18:00:00	2014-03-27 19:19:53	2014-03-27 22:00:00	0.3	1	4.8	2014-03-27 19:00:00	2014-03-28 08:45:00	2014-03-28 10:00:00	133.75	138	133.25	51795
903	2014-03-30 19:00:00	2014-03-30 20:19:53	2014-03-30 21:00:00	0.3	0.7	2.1	2014-03-30 21:00:00	2014-03-31 08:30:00	2014-03-31 10:00:00	136	143	138.25	20085.6
904	2014-03-31 08:00:00	2014-03-31 08:30:00	2014-03-31 11:00:00	0.1	0.4	3	2014-03-31 08:00:00	2014-04-01 10:00:00	2014-04-03 13:00:00	142	183	140	1.33569e+07
905	2014-03-31 21:00:00	2014-04-01 13:59:58	2014-04-01 16:00:00	0.5	3.1	3.4	2014-03-31 21:00:00	2014-04-01 16:30:00	2014-04-02 04:00:00	138	391	204	4.3163e+06
906	2014-04-06 17:00:00	2014-04-06 19:58:59	2014-04-06 23:00:00	0.2	1.1	9.5	2014-04-06 20:00:00	2014-04-06 20:30:00	2014-04-07 02:00:00	148.5	150	141	14287.5
907	2014-04-07 06:30:00	2014-04-07 15:30:01	2014-04-07 20:00:00	0.49997	2.9	7.5	2014-04-07 08:00:00	2014-04-08 11:45:00	2014-04-08 15:00:00	144	157	131	268164
908	2014-05-21 11:30:00	2014-05-21 17:34:58	2014-05-21 23:00:00	1.11661	3.9	16.1	2014-05-21 12:00:00	2014-05-22 10:00:00	2014-05-22 18:00:00	1532.5	2050	1900	7.24624e+06
909	2014-05-22 12:20:00	2014-05-22 13:29:58	2014-05-22 14:00:00	4.89846	5.2	20	2014-05-22 19:00:00	2014-05-23 11:00:00	2014-05-23 14:00:00	1915	2300	2195	3.13982e+06
910	2014-05-25 10:00:00	2014-05-25 13:30:03	2014-05-25 19:00:00	4.29888	16.2	17.3	2014-05-25 10:00:00	2014-05-26 09:30:00	2014-05-26 17:00:00	3440	4330	3845	2.69843e+07
911	2014-06-11 12:07:30	2014-06-11 12:37:30	2014-06-11 19:00:00	0.70625	2.5	3.9	2014-06-11 19:00:00	2014-06-12 09:30:00	2014-06-12 14:00:00	1490	1770	1605	5.01424e+06
912	2014-06-12 14:30:00	2014-06-12 15:29:57	2014-06-12 16:00:00	0.299933	0.5	6.3	2014-06-12 15:00:00	2014-06-13 08:45:00	2014-06-13 21:00:00	1610	2180	1687.5	2.49745e+07
913	2014-06-21 12:30:00	2014-06-21 13:00:00	2014-06-21 15:00:00	0.125	0.3	2.9	2014-06-21 12:45:00	2014-06-21 13:15:00	2014-06-22 01:00:00	886	890	725	63964.3
914	2014-06-22 13:15:00	2014-06-22 14:29:59	2014-06-22 16:00:00	1.69978	2.9	3.2	2014-06-22 17:00:00	2014-06-23 09:15:00	2014-06-23 13:00:00	743.25	801	718.25	1.01481e+06
915	2014-06-23 13:15:00	2014-06-23 14:29:59	2014-06-23 17:00:00	0.499983	1	6.1	2014-06-23 14:00:00	2014-06-24 08:00:00	2014-06-24 22:00:00	719.75	810	596	6.11745e+06
916	2014-06-24 12:12:00	2014-06-24 19:29:54	2014-06-24 20:00:00	7.29274	11.6	7.1	2014-06-24 23:00:00	2014-06-25 16:15:00	2014-06-29 02:00:00	608.75	1190	905	1.24552e+08
917	2014-06-25 12:10:00	2014-06-25 13:29:59	2014-06-25 14:00:00	10.5	11.1	15.8	2014-06-25 13:00:00	2014-06-26 08:45:00	2014-06-26 16:00:00	1155	1250	1165	2.05042e+06
918	2014-07-13 14:00:00	2014-07-13 16:30:02	2014-07-13 18:00:00	1.89887	2.3	31.9	2014-07-13 19:00:00	2014-07-14 00:30:00	2014-07-14 04:00:00	325.75	439	208	1.15359e+06
919	2014-07-14 15:06:00	2014-07-14 18:30:02	2014-07-14 22:00:00	3.69709	5	33.6	2014-07-14 18:00:00	2014-07-14 22:45:00	2014-07-15 07:00:00	458.2	810	103.475	3.29161e+06
920	2014-07-16 11:00:00	2014-07-16 11:30:00	2014-07-16 16:00:00	1.9	3.4	42.3	2014-07-16 15:00:00	2014-07-17 10:15:00	2014-07-18 12:00:00	473	806	372	17880260
921	2014-07-29 11:20:00	2014-07-29 16:29:57	2014-07-30 22:00:00	2.39986	21.3	0.4	2014-07-29 13:00:00	2014-07-31 21:30:00	2014-08-04 11:00:00	55.15	801	229	1.71886e+08
922	2014-08-13 13:00:00	2014-08-13 13:30:00	2014-08-13 19:00:00	0.3	0.7	3.2	2014-08-13 19:00:00	2014-08-14 16:30:00	2014-08-15 07:00:00	104	198	117.5	4.33738e+06
923	2014-08-14 11:00:00	2014-08-14 13:29:56	2014-08-14 15:00:00	0.799798	2.2	3.9	2014-08-14 11:00:00	2014-08-15 13:30:00	2014-08-17 20:00:00	168	282	128.25	2.01663e+07
924	2014-08-19 12:00:00	2014-08-19 13:29:55	2014-08-20 01:00:00	3.89588	6.6	4.4	2014-08-19 18:00:00	2014-08-20 18:45:00	2014-08-21 06:00:00	83.45	130	91.9	2.56143e+06
925	2014-08-22 06:12:00	2014-08-22 14:30:02	2014-08-22 16:00:00	2.19914	4	7.2	2014-08-22 08:00:00	2014-08-22 17:45:00	2014-08-24 14:00:00	64.35	210	85.8	1.334e+07
926	2014-08-26 13:01:45	2014-08-26 13:31:45	2014-08-26 20:00:00	3.30194	3.9	10.9	2014-08-26 18:00:00	2014-08-27 02:00:00	2014-08-27 22:00:00	84.05	133	90.375	1.62294e+06
927	2014-08-27 07:06:00	2014-08-27 14:30:01	2014-08-27 18:00:00	3.69842	7.3	14.8	2014-08-27 09:00:00	2014-08-28 14:30:00	2014-08-29 05:00:00	110.25	125	84.9	2.20906e+06
928	2014-08-28 11:20:00	2014-08-28 12:30:04	2014-08-28 14:00:00	1.39839	1.8	17.9	2014-08-28 12:00:00	2014-08-29 13:45:00	2014-08-31 16:00:00	115.5	147	107.5	2.42467e+07
929	2014-08-29 13:00:00	2014-08-29 16:29:57	2014-08-29 23:00:00	0.799524	1.4	19.6	2014-08-29 13:00:00	2014-08-29 16:30:00	2014-08-31 16:00:00	145.75	339	107.5	2.0755e+07
930	2014-09-06 13:00:00	2014-09-06 15:29:56	2014-09-06 16:00:00	5.39462	5.6	11.2	2014-09-06 16:00:00	2014-09-06 16:30:00	2014-09-07 02:00:00	227.25	275	179	213255
931	2014-09-21 15:00:00	2014-09-21 15:30:00	2014-09-21 18:00:00	0.6	1	0	2014-09-21 20:00:00	2014-09-22 12:15:00	2014-09-22 20:00:00	93.175	119	95.4	1.13068e+06
932	2014-10-09 09:00:00	2014-10-09 14:29:59	2014-10-09 21:00:00	3.99994	19	0	2014-10-09 09:00:00	2014-10-09 16:15:00	2014-10-14 13:00:00	108	151	111.25	9.33124e+06
933	2014-10-12 07:20:00	2014-10-12 11:30:02	2014-10-12 20:00:00	1.49987	5.5	19	2014-10-12 13:00:00	2014-10-13 11:30:00	2014-10-13 22:00:00	130.5	138	119	634503
934	2014-11-02 21:30:00	2014-11-03 11:30:01	2014-11-03 13:00:00	4.29909	16.5	0	2014-11-02 22:00:00	2014-11-03 06:00:00	2014-11-03 15:00:00	129.75	170	154.5	792440
935	2014-11-07 17:30:00	2014-11-07 20:29:59	2014-11-07 22:00:00	1.19999	2.6	16.5	2014-11-07 20:00:00	2014-11-08 00:15:00	2014-11-08 12:00:00	174	194	173.5	591068
936	2014-11-11	2014-11-11 00:30:00	2014-11-11 02:00:00	0.1	0.3	7.3	2014-11-11 01:00:00	2014-11-11 01:45:00	2014-11-11 06:00:00	175	177	173	24570
937	2014-11-11 09:00:00	2014-11-11 19:10:45	2014-11-11 20:00:00	0.1	1.1	7.6	2014-11-11 09:15:00	2014-11-11 09:15:00	2014-11-12 09:00:00	173	173	107.75	700542
938	2014-11-24 06:00:00	2014-11-24 12:30:13	2014-11-24 14:00:00	0.3	1	1.4	2014-11-24 06:00:00	2014-11-24 10:00:00	2014-11-24 17:00:00	149	170	111.5	696406
939	2014-11-25 09:07:30	2014-11-25 09:37:30	2014-11-26 08:00:00	0.704167	3.6	2.4	2014-11-25 10:00:00	2014-11-27 04:15:00	2014-11-30 22:00:00	121.5	152	144	8.42492e+06
940	2014-12-14 04:00:00	2014-12-14 20:30:00	2014-12-15	0.399919	2.3	0	2014-12-14 04:15:00	2014-12-14 04:15:00	2014-12-15 03:00:00	142	141	130	11274.7
941	2014-12-17 13:20:00	2014-12-17 13:50:00	2014-12-17 19:00:00	0.3	0.7	2.3	2014-12-17 15:00:00	2014-12-18 04:00:00	2014-12-18 12:00:00	65.35	147	117	1.33925e+06
942	2014-12-25 08:08:34	2014-12-25 15:53:26	2014-12-26 05:00:00	1	8.5	6.1	2014-12-25 09:00:00	2014-12-26 06:30:00	2014-12-26 10:00:00	126.5	134	123.5	197334
943	2015-01-28 22:00:00	2015-01-28 22:30:00	2015-01-29 03:00:00	0.2	0.5	0.5	2015-01-28 22:00:00	2015-01-28 22:15:00	2015-01-29 07:00:00	132.5	133	129	9750
944	2015-02-16 12:00:00	2015-02-16 16:29:58	2015-02-16 17:00:00	0.305751	0.5	6	2015-02-16 12:15:00	2015-02-16 12:15:00	2015-02-16 19:00:00	118	118	110.5	825
945	2015-02-20 08:20:00	2015-02-20 13:30:03	2015-02-21 05:00:00	1.09941	6	6.5	2015-02-20 12:00:00	2015-02-20 17:00:00	2015-02-21 11:00:00	112	133	109	712438
946	2015-02-21 10:30:00	2015-02-21 14:30:01	2015-02-21 19:00:00	1.09966	3.1	6.5	2015-02-21 12:00:00	2015-02-21 21:30:00	2015-02-22 02:00:00	109.5	121	111	232039
947	2015-05-02 16:00:00	2015-05-02 16:30:00	2015-05-02 18:00:00	3	3.7	1.9	2015-05-03 01:00:00	2015-05-03 11:00:00	2015-05-03 18:00:00	1075	1150	1035	2.9111e+06
948	2015-05-04 15:07:30	2015-05-04 15:37:30	2015-05-04 18:00:00	0.70625	0.9	8.1	2015-05-04 16:00:00	2015-05-05 09:00:00	2015-05-05 19:00:00	1072.5	1180	1112.5	2.64992e+06
949	2015-05-08 06:07:30	2015-05-08 23:29:55	2015-05-09 01:00:00	3.09823	18.3	19.9	2015-05-08 07:00:00	2015-05-10 01:00:00	2015-05-11 06:00:00	1605	2860	2497.5	7.83277e+07
950	2015-05-09 07:05:27	2015-05-09 09:29:58	2015-05-10 05:00:00	2.79918	20.2	34.5	2015-05-09 08:00:00	2015-05-10 07:15:00	2015-05-10 18:00:00	2082.5	2980	2672.5	3.58012e+07
951	2015-05-16 11:12:00	2015-05-16 12:29:59	2015-05-16 21:00:00	0.599993	2	8.6	2015-05-16 11:27:00	2015-05-16 11:30:00	2015-05-16 23:00:00	1910	1880	1765	49695.7
952	2015-05-17 17:00:00	2015-05-17 17:30:00	2015-05-17 19:00:00	0.2	0.4	10.6	2015-05-17 17:00:00	2015-05-17 17:30:00	2015-05-18	1722.5	1730	1690	112741
953	2015-05-20 09:30:00	2015-05-20 14:30:02	2015-05-20 23:00:00	0.999934	5.1	13.8	2015-05-20 11:00:00	2015-05-20 13:15:00	2015-05-21 01:00:00	2405	2570	2415	2.49348e+06
954	2015-05-21 11:00:00	2015-05-21 14:29:57	2015-05-21 15:00:00	0.799728	1.3	16.6	2015-05-21 11:00:00	2015-05-21 11:45:00	2015-05-21 22:00:00	2465	2480	2297.5	504818
955	2015-05-22 03:00:00	2015-05-22 11:35:58	2015-05-23	0.939816	3.9	16.1	2015-05-22 03:00:00	2015-05-23 10:30:00	2015-05-23 14:00:00	2307.5	2590	2477.5	5.69623e+06
956	2015-05-29 13:20:00	2015-05-29 15:44:55	2015-05-29 17:00:00	0.324976	0.8	7.3	2015-05-29 13:35:00	2015-05-29 14:00:00	2015-05-29 22:00:00	2040	2060	1970	348000
957	2015-06-10 22:00:00	2015-06-11 00:30:02	2015-06-11 02:00:00	1.39947	3.4	9.9	2015-06-10 22:00:00	2015-06-12 02:00:00	2015-06-12 22:00:00	2987.5	4130	3787.5	84416250
958	2015-06-13 13:00:00	2015-06-13 13:30:00	2015-06-13 16:00:00	1.2	2.4	32.5	2015-06-13 13:15:00	2015-06-13 13:15:00	2015-06-13 21:00:00	4080	4010	3492.5	148101
959	2015-07-04 14:00:00	2015-07-04 16:29:56	2015-07-04 17:00:00	1.0994	2.7	10.9	2015-07-04 17:00:00	2015-07-04 20:00:00	2015-07-05 03:00:00	272	294	217.5	561049
960	2015-07-06 06:12:00	2015-07-06 06:47:54	2015-07-06 09:00:00	0.5	1.3	20.4	2015-07-06 07:00:00	2015-07-07 07:45:00	2015-07-13	411.75	612	384	2.80102e+08
961	2015-07-07 03:15:00	2015-07-07 03:45:00	2015-07-07 05:00:00	0.35	0.6	18.1	2015-07-07 04:00:00	2015-07-08 05:00:00	2015-07-12 06:00:00	507.75	659	506	2.19337e+08
962	2015-07-07 10:00:00	2015-07-07 17:30:02	2015-07-07 21:00:00	2.19891	5.7	18.7	2015-07-07 12:00:00	2015-07-08 20:45:00	2015-07-11 16:00:00	587	1420	685	1.67415e+08
963	2015-07-08 03:10:00	2015-07-08 13:29:58	2015-07-08 16:00:00	1.09971	8.4	18.4	2015-07-08 04:00:00	2015-07-09 03:15:00	2015-07-11 16:00:00	644	1950	685	1.61125e+08
964	2015-08-11 13:30:00	2015-08-11 15:29:58	2015-08-11 16:00:00	0.224924	0.5	0.3	2015-08-11 14:00:00	2015-08-12 01:15:00	2015-08-12 05:00:00	160.25	168	155.5	339529
965	2015-08-16 13:00:50	2015-08-16 13:30:50	2015-08-16 21:00:00	7.00278	7.8	4.1	2015-08-16 16:00:00	2015-08-16 21:15:00	2015-08-18 12:00:00	147.25	307	148	1.16239e+07
966	2015-08-18 17:30:00	2015-08-18 20:29:59	2015-08-19	1.89999	6.5	12.4	2015-08-18 19:00:00	2015-08-19 08:00:00	2015-08-20 09:00:00	138.25	185	147.25	3.52546e+06
967	2015-08-26 12:07:30	2015-08-26 13:30:00	2015-08-26 15:00:00	1.19993	2.3	0	2015-08-26 13:00:00	2015-08-27 12:15:00	2015-08-30 23:00:00	101.5	118	97.3	1.17563e+07
968	2015-08-27 04:07:30	2015-08-27 04:37:30	2015-08-27 06:00:00	0.7375	1.1	2.3	2015-08-27 05:00:00	2015-08-27 22:15:00	2015-08-30 23:00:00	103.5	119	97.3	11327180
969	2015-08-27 12:20:00	2015-08-27 13:29:58	2015-08-27 14:00:00	0.900048	1.3	3.4	2015-08-27 15:00:00	2015-08-28 13:30:00	2015-08-28 16:00:00	116.5	134	120.25	229815
970	2015-09-04 12:06:00	2015-09-04 12:36:00	2015-09-04 16:00:00	0.904762	2	6.2	2015-09-04 13:00:00	2015-09-04 17:15:00	2015-09-05 17:00:00	96.025	297	93.175	5.00716e+06
971	2015-10-02 13:04:17	2015-10-02 16:30:02	2015-10-03 01:00:00	4.39759	9.1	14.7	2015-10-02 14:00:00	2015-10-02 22:15:00	2015-10-03 19:00:00	24.325	57.2	31	1.54722e+06
972	2015-10-06 13:15:00	2015-10-06 15:30:00	2015-10-06 21:00:00	3.39952	9.2	9.7	2015-10-06 16:00:00	2015-10-07 18:45:00	2015-10-12 16:00:00	16.175	101	16.7	3.3678e+07
973	2015-10-21 00:10:00	2015-10-21 01:29:59	2015-10-21 10:00:00	1.4	5.7	2.7	2015-10-21 01:00:00	2015-10-21 09:45:00	2015-10-21 21:00:00	17.3	24.3	14.6	185237
974	2015-10-22 07:07:30	2015-10-22 10:29:56	2015-10-23 05:00:00	3.49821	30.8	8.4	2015-10-22 09:00:00	2015-10-22 14:00:00	2015-10-23 08:00:00	14.6	29.7	17.2	458703
975	2015-10-26 01:07:30	2015-10-26 01:37:30	2015-10-26 05:00:00	0.7375	1.6	36.5	2015-10-26 03:00:00	2015-10-26 18:15:00	2015-10-29 12:00:00	38	68.2	33.725	7.15402e+06
976	2015-10-27 02:00:00	2015-10-27 07:29:59	2015-10-27 08:00:00	1.99996	2.3	32.4	2015-10-27 04:00:00	2015-10-27 17:15:00	2015-10-28 08:00:00	61.1	76.8	64.1	449608
977	2015-11-16 07:20:00	2015-11-16 20:30:01	2015-11-17 04:00:00	0.999971	9.4	20.4	2015-11-16 22:00:00	2015-11-17 04:15:00	2015-11-17 19:00:00	63.075	103	77.625	1.49099e+06
978	2015-11-18 13:00:00	2015-11-18 16:30:03	2015-11-18 18:00:00	0.499901	2	9.4	2015-11-18 13:15:00	2015-11-18 13:15:00	2015-11-18 22:00:00	74.6	73.5	52.825	1534.82
979	2015-11-20 04:30:00	2015-11-20 08:30:01	2015-11-20 18:00:00	0.79984	4.4	11.4	2015-11-20 05:00:00	2015-11-20 19:15:00	2015-11-21	72.125	80.2	75.7	68987.1
980	2015-12-11 02:12:00	2015-12-11 03:29:59	2015-12-11 07:00:00	2.39987	3.6	0.2	2015-12-11 04:00:00	2015-12-12 07:00:00	2015-12-13 18:00:00	103.25	111	98.6	2.36684e+06
981	2015-12-12 08:30:00	2015-12-12 14:52:06	2015-12-12 16:00:00	1	3	4.2	2015-12-12 09:00:00	2015-12-12 14:15:00	2015-12-12 20:00:00	118.5	125	122	110547
982	2015-12-14 20:00:00	2015-12-15 05:29:58	2015-12-15 08:00:00	1.59953	5.2	7.2	2015-12-14 20:00:00	2015-12-15 05:30:00	2015-12-15 11:00:00	99.2	134	121.5	721794
983	2016-01-31 16:15:00	2016-02-01 20:30:01	2016-02-02 02:00:00	1.89996	23.7	1	2016-01-31 17:00:00	2016-02-02 10:15:00	2016-02-02 16:00:00	94.775	111	101	587918
984	2016-02-02 08:00:00	2016-02-02 08:30:00	2016-02-02 10:00:00	0.4	0.7	24.7	2016-02-02 08:00:00	2016-02-03 09:45:00	2016-02-03 14:00:00	107	119	95.1	403706
985	2016-03-18 13:00:00	2016-03-18 13:30:00	2016-03-18 16:00:00	0.1	0.4	11.2	2016-03-18 13:00:00	2016-03-18 13:15:00	2016-03-18 23:00:00	66.825	67.1	54.3	3249.56
986	2016-03-22 20:00:00	2016-03-23 02:30:01	2016-03-23 18:00:00	3.39965	31.7	9.1	2016-03-22 20:00:00	2016-03-23 11:30:00	2016-03-23 19:00:00	126	239	195	1589850
987	2016-04-10 16:05:27	2016-04-10 16:35:27	2016-04-10 22:00:00	1.06362	3.1	1.3	2016-04-10 17:00:00	2016-04-11 13:45:00	2016-04-11 19:00:00	376.75	479	433	1.34103e+06
988	2016-04-11 16:00:00	2016-04-11 17:29:55	2016-04-11 18:00:00	0.224698	0.4	3.1	2016-04-11 16:15:00	2016-04-11 16:15:00	2016-04-11 19:00:00	453	449	433	3477.27
989	2016-04-12 12:00:00	2016-04-12 16:29:58	2016-04-12 18:00:00	1.09963	2.4	3.5	2016-04-12 14:00:00	2016-04-13 13:30:00	2016-04-13 20:00:00	428.5	443	433.75	318690
990	2016-04-30 08:00:00	2016-04-30 10:30:02	2016-05-01 08:00:00	2.89868	10.6	34.5	2016-04-30 09:00:00	2016-04-30 19:45:00	2016-05-01 12:00:00	662	685	633.25	999192
991	2016-05-07 11:15:00	2016-05-07 14:29:55	2016-05-07 19:00:00	4.29898	16.9	3.7	2016-05-07 12:00:00	2016-05-08 10:00:00	2016-05-11 16:00:00	1035	2030	1765	176805855
992	2016-05-08 12:03:31	2016-05-08 12:33:31	2016-05-08 17:00:00	1.60544	4.1	20.6	2016-05-08 13:00:00	2016-05-09 12:15:00	2016-05-09 23:00:00	1970	2210	2017.5	1.01592e+07
993	2016-05-18 11:10:00	2016-05-18 12:29:59	2016-05-18 18:00:00	1.8988	5.1	22.7	2016-05-18 12:00:00	2016-05-18 13:00:00	2016-05-18 22:00:00	2047.5	2060	1960	249750
994	2016-05-22 13:20:00	2016-05-22 14:29:58	2016-05-22 17:00:00	1.89946	3.4	8.3	2016-05-22 21:00:00	2016-05-23 09:30:00	2016-05-23 14:00:00	2267.5	2400	2345	1.46131e+06
995	2016-05-31 11:15:00	2016-05-31 13:30:00	2016-05-31 16:00:00	4.09935	5.3	15.6	2016-05-31 20:00:00	2016-06-01 08:45:00	2016-06-01 20:00:00	1400	1560	1327.5	7.24577e+06
996	2016-06-01 13:30:00	2016-06-01 14:29:57	2016-06-01 15:00:00	1.19933	1.4	18.3	2016-06-01 21:00:00	2016-06-02 09:30:00	2016-06-02 23:00:00	1337.5	1590	1242.5	1.12202e+07
997	2016-06-07 12:03:00	2016-06-07 14:30:02	2016-06-07 18:00:00	4.89757	10.4	8.7	2016-06-07 22:00:00	2016-06-08 08:15:00	2016-06-08 18:00:00	1560	2110	1857.5	1.56922e+07
998	2016-06-08 12:06:00	2016-06-08 12:36:00	2016-06-08 16:00:00	0.908889	2.2	17.7	2016-06-08 19:00:00	2016-06-09 07:00:00	2016-06-09 21:00:00	1867.5	2340	1637.5	3.094e+07
999	2016-06-09 13:20:00	2016-06-09 13:50:00	2016-06-09 20:00:00	0.3	0.8	19.9	2016-06-09 22:00:00	2016-06-10 07:15:00	2016-06-10 22:00:00	1652.5	2520	1862.5	3.09471e+07
1000	2016-06-10 11:15:00	2016-06-10 12:29:59	2016-06-10 13:00:00	0.999898	1.4	20.7	2016-06-10 23:00:00	2016-06-11 07:30:00	2016-06-11 21:00:00	1882.5	2700	2007.5	2.89292e+07
1001	2016-06-11 14:00:00	2016-06-11 19:29:59	2016-06-11 21:00:00	0.499994	1.5	17	2016-06-11 22:00:00	2016-06-12 08:00:00	2016-06-12 22:00:00	2037.5	2990	2205	3.53173e+07
1002	2016-07-15 14:03:45	2016-07-15 14:33:45	2016-07-15 17:00:00	1.5125	2.2	0	2016-07-15 15:00:00	2016-07-16 12:45:00	2016-07-16 19:00:00	23.675	135	46.6	1.35386e+06
1003	2016-07-22 13:02:24	2016-07-22 13:32:24	2016-07-22 20:00:00	2.40129	5.8	5.7	2016-07-22 15:00:00	2016-07-23 03:00:00	2016-07-23 13:00:00	234.75	258	224.25	1.12341e+06
1004	2016-07-31 15:04:36	2016-07-31 15:34:36	2016-07-31 17:00:00	1.36917	2.4	4.3	2016-07-31 16:00:00	2016-07-31 20:45:00	2016-08-01 02:00:00	125.5	213	118	792506
1005	2016-08-05 15:06:39	2016-08-05 16:29:57	2016-08-05 18:00:00	3.39803	4.6	4.8	2016-08-05 16:00:00	2016-08-05 17:15:00	2016-08-06 09:00:00	183.5	323	193	2774025
1006	2016-08-09 11:30:00	2016-08-09 15:30:01	2016-08-09 20:00:00	4.49904	8	13.6	2016-08-09 11:45:00	2016-08-09 12:00:00	2016-08-10 03:00:00	104	107	98.3	9511.97
1007	2016-08-10 15:20:00	2016-08-10 17:29:59	2016-08-10 18:00:00	0.299999	0.8	19.4	2016-08-10 16:00:00	2016-08-11 13:00:00	2016-08-11 20:00:00	106.75	134	96.25	1.19298e+06
1008	2016-08-16 15:05:00	2016-08-16 15:35:00	2016-08-16 18:00:00	1.18333	3.2	3.4	2016-08-16 19:00:00	2016-08-17 11:30:00	2016-08-18 13:00:00	64.9	82.7	66	1.53816e+06
1009	2016-08-18 10:12:00	2016-08-18 11:29:59	2016-08-18 15:00:00	7.49951	9.8	5.8	2016-08-18 14:00:00	2016-08-19 01:00:00	2016-08-19 06:00:00	67.7	89.1	56.4	540404
1010	2016-08-19 12:10:00	2016-08-19 14:29:55	2016-08-19 17:00:00	6.99918	14.7	14.7	2016-08-19 13:00:00	2016-08-19 16:45:00	2016-08-21 16:00:00	75.9	334	129.25	1.37129e+07
1011	2016-08-22 11:30:00	2016-08-22 13:29:58	2016-08-22 14:00:00	0.799966	1.7	27.7	2016-08-22 11:45:00	2016-08-22 11:45:00	2016-08-22 19:00:00	190	190	167.5	1350
1012	2016-08-24 03:20:00	2016-08-24 06:29:55	2016-08-24 07:00:00	0.506946	0.9	26.6	2016-08-24 09:00:00	2016-08-25 03:45:00	2016-08-26 09:00:00	139.5	176	136.5	5.04311e+06
1013	2016-08-24 14:07:30	2016-08-24 18:29:57	2016-08-24 19:00:00	2.19898	5.1	17.7	2016-08-24 18:00:00	2016-08-25 15:45:00	2016-08-26 09:00:00	161.75	194	136.5	2.72375e+06
1014	2016-08-25 18:00:00	2016-08-25 19:30:01	2016-08-26 01:00:00	0.41665	1.4	8.1	2016-08-25 21:00:00	2016-08-26 16:15:00	2016-08-26 22:00:00	176.5	326	170	928053
1015	2016-10-11 18:00:00	2016-10-11 20:29:56	2016-10-11 21:00:00	1.19899	1.5	0	2016-10-12	2016-10-12 07:00:00	2016-10-17 23:00:00	37.5	40.4	8.86	1.11576e+07
1016	2016-10-17 10:00:00	2016-10-17 10:30:00	2016-10-17 15:00:00	0.3	1	1.9	2016-10-17 10:15:00	2016-10-17 10:15:00	2016-10-17 23:00:00	39.6	38.7	8.86	138655
1017	2016-12-14 07:00:00	2016-12-15 00:29:56	2016-12-15 01:00:00	0.199893	1.6	4.3	2016-12-14 13:00:00	2016-12-15 21:30:00	2016-12-22 10:00:00	9.91	10.8	10.4	413428
1018	2016-12-16 07:00:00	2016-12-16 07:30:00	2016-12-16 10:00:00	0.1	0.4	5.9	2016-12-16 16:00:00	2016-12-16 20:15:00	2016-12-16 22:00:00	11.1	13.9	11.7	15502.5
1019	2017-01-15 21:30:00	2017-01-15 23:29:58	2017-01-16 05:00:00	0.399898	1.1	4.2	2017-01-15 22:00:00	2017-01-17 03:45:00	2017-01-17 06:00:00	104	109	101	405577
1020	2017-03-25 22:20:00	2017-03-26 00:29:59	2017-03-26 05:00:00	1.39999	2.5	1	2017-03-26 11:00:00	2017-03-26 22:15:00	2017-03-27 02:00:00	35.5	44.8	42.1	112905
1021	2017-03-27 12:20:00	2017-03-27 17:41:58	2017-03-27 19:00:00	0.6	1.6	3.2	2017-03-27 22:00:00	2017-03-28 19:00:00	2017-03-29 21:00:00	38.5	103	71.7	4.10368e+06
1022	2017-03-28 04:30:00	2017-03-28 15:29:57	2017-03-28 21:00:00	1.99965	19.8	4.6	2017-03-28 09:00:00	2017-03-29 02:15:00	2017-03-29 21:00:00	37.3	130	71.7	4579230
1023	2017-05-17 13:20:00	2017-05-19 12:29:59	2017-05-19 18:00:00	3.69963	94.1	0.1	2017-05-17 22:00:00	2017-05-18 13:30:00	2017-05-19 20:00:00	54.575	1330	969.75	4.7598e+07
1024	2017-05-21 10:15:00	2017-05-21 11:29:59	2017-05-21 20:00:00	0.499983	2.5	94.2	2017-05-21 13:00:00	2017-05-22 19:45:00	2017-06-01 05:00:00	1157.5	1710	1497.5	6.55032e+08
1025	2017-05-22 13:00:00	2017-05-22 16:29:57	2017-05-22 19:00:00	1.39984	4	96.6	2017-05-22 15:00:00	2017-05-23 09:30:00	2017-05-23 14:00:00	1645	1830	1752.5	4.3449e+06
1026	2017-05-25 14:20:00	2017-05-25 21:33:00	2017-05-25 23:00:00	1.95498	5.7	6.6	2017-05-25 17:00:00	2017-05-25 18:00:00	2017-05-26	2660	2750	2560	383143
1027	2017-06-02 11:30:00	2017-06-02 13:30:04	2017-06-02 18:00:00	0.998933	2.8	3.9	2017-06-02 11:45:00	2017-06-02 11:45:00	2017-06-02 22:00:00	1570	1570	1252.5	1.23882e+06
1028	2017-06-05 09:01:03	2017-06-05 10:29:58	2017-06-05 14:00:00	9.49901	24.5	3	2017-06-05 16:00:00	2017-06-06 08:30:00	2017-06-06 22:00:00	1637.5	1900	1575	1.10544e+07
1029	2017-06-06 13:00:00	2017-06-06 14:30:01	2017-06-06 21:00:00	0.199967	0.8	28.5	2017-06-06 23:00:00	2017-06-07 07:45:00	2017-06-07 22:00:00	1595	1920	1360	2.09053e+07
1030	2017-06-07 11:30:00	2017-06-07 14:29:53	2017-06-07 19:00:00	3.39576	5.3	29.3	2017-06-07 23:00:00	2017-06-08 09:45:00	2017-06-08 22:00:00	1377.5	2320	1645	3.23527e+07
1031	2017-06-20 14:15:00	2017-06-20 15:30:05	2017-06-20 19:00:00	3.69469	7	0	2017-06-20 22:00:00	2017-06-21 09:45:00	2017-06-21 23:00:00	494.25	892	601	1.439e+07
1032	2017-07-26 10:01:27	2017-07-26 10:31:27	2017-07-26 21:00:00	4.03385	13.7	32.8	2017-07-26 11:00:00	2017-07-27 09:00:00	2017-07-29 23:00:00	138.5	323	167.5	2.35157e+07
1033	2017-07-30 12:02:00	2017-07-30 12:32:00	2017-07-30 14:00:00	2.91	3.3	48.8	2017-07-30 13:00:00	2017-07-30 16:00:00	2017-07-30 17:00:00	211	237	208	194400
1034	2017-08-03 01:01:42	2017-08-03 01:31:42	2017-08-03 03:00:00	3.47083	6	13.2	2017-08-03 04:00:00	2017-08-04 03:00:00	2017-08-04 10:00:00	182.5	234	193	1.45828e+06
1035	2017-08-04 16:00:00	2017-08-04 17:29:55	2017-08-04 18:00:00	0.710158	0.9	13.5	2017-08-04 17:00:00	2017-08-04 18:30:00	2017-08-05 04:00:00	278.25	292	267.75	305478
1036	2017-08-05 13:15:00	2017-08-05 17:29:56	2017-08-05 18:00:00	0.89957	1.8	11.1	2017-08-05 15:00:00	2017-08-05 19:30:00	2017-08-05 23:00:00	230	283	211.25	502235
1037	2017-08-06 13:00:00	2017-08-06 17:30:04	2017-08-07 05:00:00	1.39841	6.5	12.9	2017-08-06 15:00:00	2017-08-06 21:30:00	2017-08-12 14:00:00	150	317	139.75	5.53464e+07
1038	2017-08-07 13:04:36	2017-08-07 13:34:36	2017-08-07 17:00:00	1.346	2.2	19.4	2017-08-07 14:00:00	2017-08-08 11:00:00	2017-08-09 11:00:00	254	365	260.5	4398545
1039	2017-08-08 09:00:00	2017-08-09 11:30:00	2017-08-09 23:00:00	3.49946	19.8	18.8	2017-08-08 09:00:00	2017-08-10 15:30:00	2017-08-11 05:00:00	259.75	446	271	8.3996e+06
1040	2017-08-20 11:15:00	2017-08-20 11:45:00	2017-08-20 16:00:00	0.35	0.9	6.6	2017-08-20 12:00:00	2017-08-20 18:00:00	2017-08-20 23:00:00	133.5	215	50.4	1.77776e+06
1041	2017-08-23 10:20:00	2017-08-23 16:29:58	2017-08-23 17:00:00	3.99886	6.2	0.9	2017-08-23 11:00:00	2017-08-24 16:15:00	2017-08-24 18:00:00	550	633	525.5	161506
1042	2017-08-29 11:00:00	2017-08-29 14:29:57	2017-08-29 15:00:00	0.299932	0.6	0.2	2017-08-29 11:15:00	2017-08-29 11:15:00	2017-08-29 18:00:00	518	515	470.5	56541.7
1043	2017-08-31 11:00:00	2017-08-31 12:30:01	2017-08-31 21:00:00	1.00831	2.9	0.9	2017-08-31 11:00:00	2017-09-01 20:30:00	2017-09-02 11:00:00	479	615	508	2.91723e+06
1044	2017-09-08 13:00:00	2017-09-08 18:29:59	2017-09-08 19:00:00	0.612482	0.9	0	2017-09-08 13:00:00	2017-09-08 15:15:00	2017-09-10 16:00:00	364	465	385	1.37685e+07
1045	2017-09-09 13:08:34	2017-09-09 16:30:00	2017-09-09 18:00:00	1.09985	2	0.9	2017-09-09 15:00:00	2017-09-10 07:15:00	2017-09-10 12:00:00	460.5	469	419.75	1.37114e+06
1046	2017-09-10 10:02:24	2017-09-10 12:30:02	2017-09-10 15:00:00	5.79843	13.3	2.9	2017-09-10 14:00:00	2017-09-10 17:15:00	2017-09-12 12:00:00	420.5	462	272.25	1.49815e+07
1047	2017-09-12 13:30:00	2017-09-12 16:37:30	2017-09-12 18:00:00	0.774952	1.6	16.2	2017-09-12 14:00:00	2017-09-12 20:30:00	2017-09-12 23:00:00	286.75	292	284	38487.5
1048	2017-09-13 14:30:00	2017-09-13 17:29:59	2017-09-13 18:00:00	1.1	1.9	17.8	2017-09-13 17:00:00	2017-09-14 01:45:00	2017-09-14 10:00:00	257.5	261	255.5	133954
1049	2017-10-01 09:00:00	2017-10-01 11:30:02	2017-10-01 21:00:00	1.8998	8.1	19.8	2017-10-01 14:00:00	2017-10-02 17:30:00	2017-10-04 19:00:00	110.25	179	104.25	1.18299e+07
1050	2017-10-02 04:12:00	2017-10-02 05:29:59	2017-10-02 19:00:00	2.69985	16.7	25	2017-10-02 05:00:00	2017-10-03 15:00:00	2017-10-03 17:00:00	126.75	300	142.75	3.96651e+06
1051	2017-10-08 18:07:30	2017-10-08 22:29:57	2017-10-09 13:00:00	2.2991	23.7	0	2017-10-08 20:00:00	2017-10-09 09:45:00	2017-10-11 04:00:00	89.55	144	88.4	3.99531e+06
1052	2017-11-17 03:15:00	2017-11-17 14:29:53	2017-11-18 01:00:00	2.29732	11.3	0.2	2017-11-17 04:00:00	2017-11-18 07:15:00	2017-11-18 12:00:00	62.7	81.4	70.6	435417
1053	2018-01-31 21:00:00	2018-01-31 21:30:00	2018-02-01 09:00:00	0.8	3.5	0	2018-01-31 22:00:00	2018-02-01 02:15:00	2018-02-01 11:00:00	33.8	37.6	32.1	118966
1054	2018-02-10 05:00:00	2018-02-10 07:30:02	2018-02-10 09:00:00	0.699802	1.9	3.3	2018-02-10 09:00:00	2018-02-11 07:45:00	2018-02-12 05:00:00	10.4656	15.9	6.41	493465
1055	2018-02-13	2018-02-13 01:29:55	2018-02-13 02:00:00	1.99842	3	4.1	2018-02-13	2018-02-14 02:00:00	2018-02-15 15:00:00	9.055	25.8	18	1.67472e+06
1056	2018-03-10 12:15:00	2018-03-10 13:29:59	2018-03-10 14:00:00	0.499983	0.9	1	2018-03-10 12:30:00	2018-03-10 12:30:00	2018-03-10 18:00:00	36.3	37.1	32.4	15790.9
1057	2018-03-12 17:30:00	2018-03-12 18:30:15	2018-03-12 20:00:00	0.3	0.8	2	2018-03-13 09:00:00	2018-03-13 12:00:00	2018-03-13 18:00:00	25.85	42.1	34.9	243789
1058	2018-03-15 12:08:34	2018-03-15 17:29:56	2018-03-15 23:00:00	2.69958	12.6	2.8	2018-03-15 13:00:00	2018-03-16 07:45:00	2018-03-16 15:00:00	40.625	50.4	46.6	95560.1
1059	2018-03-25 17:00:00	2018-03-25 18:30:01	2018-03-25 21:00:00	0.699868	1.9	1.4	2018-03-25 19:00:00	2018-03-26 16:00:00	2018-03-27	65.6	86.7	79.8	245941
1060	2018-03-28 09:20:00	2018-03-28 15:29:58	2018-03-29	1.89993	10	4.8	2018-03-28 14:00:00	2018-03-29 17:15:00	2018-03-30 19:00:00	26.75	148	20.5	3.24695e+06
1061	2018-05-11 17:30:00	2018-05-11 23:29:57	2018-05-12 05:00:00	1.69885	2.3	0	2018-05-11 19:00:00	2018-05-13 05:00:00	2018-05-14 23:00:00	647	1430	1219.17	2.32889e+08
1062	2018-05-12 14:00:00	2018-05-12 18:30:04	2018-05-12 22:00:00	0.999469	2.6	2.3	2018-05-12 14:00:00	2018-05-13 09:00:00	2018-05-13 21:00:00	1160	1630	1264.17	3.64773e+07
1063	2018-05-20 14:12:00	2018-05-20 17:29:56	2018-05-20 18:00:00	0.499892	1.4	11.5	2018-05-21	2018-05-21 08:50:00	2018-05-22	563.417	773	499.833	2.48092e+07
1064	2018-05-22 14:20:00	2018-05-22 15:29:58	2018-05-22 19:00:00	1.89946	4.4	12.7	2018-05-22 18:00:00	2018-05-22 18:30:00	2018-05-22 22:00:00	927.5	1080	697.75	3.02055e+06
1065	2018-05-23 09:08:34	2018-05-23 10:29:58	2018-05-23 11:00:00	1.19974	1.9	17.1	2018-05-23 09:23:34	2018-05-23 12:20:00	2018-05-23 16:00:00	1010	1060	790.083	1.31224e+06
1066	2018-06-15 15:20:00	2018-06-15 17:29:59	2018-06-15 20:00:00	0.599997	1.6	0.1	2018-06-16 02:00:00	2018-06-16 11:35:00	2018-06-17	196	282	253.5	7.29032e+06
1067	2018-06-17 09:04:36	2018-06-17 13:30:04	2018-06-18 01:00:00	4.39856	24.6	8.3	2018-06-17 10:00:00	2018-06-18 10:50:00	2018-06-18 22:00:00	320.917	1070	658.333	9.5507e+07
1068	2018-06-21 14:07:30	2018-06-21 14:37:30	2018-06-21 18:00:00	0.7125	1.4	33.4	2018-06-21 14:22:30	2018-06-21 14:40:00	2018-06-22 05:00:00	506	506	302.5	2.01111e+06
1069	2018-07-07 13:01:32	2018-07-07 13:31:32	2018-07-07 15:00:00	3.81278	4.4	2	2018-07-07 14:00:00	2018-07-08 12:30:00	2018-07-09 12:00:00	144.5	186	154.167	8.13248e+06
1070	2018-07-21 13:02:18	2018-07-21 13:32:18	2018-07-21 19:00:00	2.60123	3.7	11.5	2018-07-21 18:00:00	2018-07-22 07:40:00	2018-07-22 14:00:00	117.5	149	111.167	3.00774e+06
1071	2018-07-23 01:07:30	2018-07-23 02:06:15	2018-07-23 05:00:00	0.8	2	28.2	2018-07-23 04:00:00	2018-07-23 19:55:00	2018-07-25 12:00:00	111.5	262	139.083	3.15316e+07
1072	2018-07-25 23:05:27	2018-07-26 00:29:57	2018-07-26 01:00:00	4.59762	5.7	36.5	2018-07-26 01:00:00	2018-07-26 02:55:00	2018-07-26 07:00:00	161.5	186	141.417	856409
1073	2018-07-28 12:12:00	2018-07-28 15:29:56	2018-07-28 16:00:00	8.89089	9.5	32.5	2018-07-28 13:00:00	2018-07-29 12:35:00	2018-07-29 21:00:00	172.833	324	180.5	9.51725e+06
1074	2018-08-05 06:12:00	2018-08-05 16:31:04	2018-08-05 19:00:00	5.4012	6.8	1.4	2018-08-05 09:00:00	2018-08-05 12:45:00	2018-08-05 23:00:00	75.9	215	48.05	7.26441e+06
1075	2018-08-17 12:06:00	2018-08-17 12:36:00	2018-08-17 16:00:00	0.93	1.6	10.6	2018-08-17 13:00:00	2018-08-18 06:00:00	2018-08-19 15:00:00	117.75	196	117.083	2.83834e+07
1076	2018-08-18 10:30:00	2018-08-18 11:29:57	2018-08-18 16:00:00	1.89886	3.1	12.2	2018-08-18 10:45:00	2018-08-18 10:45:00	2018-08-18 22:00:00	190	190	178.833	68206.1
1077	2018-08-21 03:04:36	2018-08-21 03:34:36	2018-08-21 05:00:00	1.392	2.6	4.9	2018-08-21 15:00:00	2018-08-21 21:05:00	2018-08-24 13:00:00	98.4083	134	87.4833	2.78951e+07
1078	2018-08-21 12:01:16	2018-08-21 12:31:16	2018-08-21 14:00:00	4.72754	6.2	7.5	2018-08-21 15:00:00	2018-08-22 11:15:00	2018-08-24 13:00:00	98.4083	152	87.4833	2.78951e+07
1079	2018-09-08 16:03:09	2018-09-08 16:33:09	2018-09-08 20:00:00	1.8021	2.1	4.4	2018-09-08 16:18:09	2018-09-08 16:25:00	2018-09-10 04:00:00	163	173	71.2417	535633
1080	2018-09-24 05:04:17	2018-09-24 05:34:17	2018-09-24 07:00:00	1.32142	1.7	1.4	2018-09-24 05:19:17	2018-09-24 05:25:00	2018-09-24 13:00:00	82.7	84	50.4	852726
1081	2018-12-05 20:30:00	2018-12-05 23:10:09	2018-12-06 04:00:00	0.4	1.7	3.1	2018-12-05 20:45:00	2018-12-05 20:45:00	2018-12-06 05:00:00	7.67	7.67	6.37	35.4545
1082	2018-12-12 21:15:00	2018-12-12 21:45:00	2018-12-12 23:00:00	0.375	0.7	0	2018-12-13	2018-12-13 01:15:00	2018-12-13 07:00:00	11.4383	15.4	7.79	155766
1083	2018-12-24 07:15:00	2018-12-24 07:45:00	2018-12-24 11:00:00	0.325	0.6	1.2	2018-12-24 11:00:00	2018-12-24 13:50:00	2018-12-25	11.1	15.9	8.86	273304
1084	2018-12-31 12:00:00	2018-12-31 12:30:00	2018-12-31 16:00:00	0.2	0.6	0	2018-12-31 13:00:00	2019-01-01 03:05:00	2019-01-01 12:00:00	7.73917	17.5	13.4083	626347
1085	2019-01-17 18:20:00	2019-01-17 18:50:00	2019-01-17 20:00:00	0.233333	0.4	0.3	2019-01-17 19:00:00	2019-01-18 03:40:00	2019-01-18 07:00:00	17.3333	18.6	18	27386.7
1086	2019-02-06 06:20:00	2019-02-06 07:30:04	2019-02-06 15:00:00	1.39933	4.5	1	2019-02-06 11:00:00	2019-02-07 14:05:00	2019-02-07 18:00:00	26.8333	43	28.875	1.13679e+06
1087	2019-02-19 13:30:00	2019-02-19 14:00:00	2019-02-19 17:00:00	0.2	0.7	3.5	2019-02-19 21:00:00	2019-02-20 08:10:00	2019-02-20 09:00:00	24.6833	43	35.5667	550781
1088	2019-02-28 22:07:30	2019-03-01 04:30:00	2019-03-01 11:00:00	1.39993	3.4	0	2019-02-28 23:00:00	2019-03-02 05:20:00	2019-03-02 12:00:00	30.7	36.3	32.4	467242
1089	2019-03-01 19:20:00	2019-03-02 02:29:59	2019-03-03	2.69999	27.4	3.4	2019-03-01 21:00:00	2019-03-02 21:00:00	2019-03-03 05:00:00	32.2	41.3	33.3167	736517
1090	2019-03-10 13:00:00	2019-03-10 14:53:03	2019-03-10 17:00:00	0.4	1.4	21.2	2019-03-10 17:00:00	2019-03-11 08:40:00	2019-03-11 17:00:00	31.6333	34.7	29.8083	621385
1091	2019-03-12 22:12:00	2019-03-13 09:30:05	2019-03-14 05:00:00	4.79589	36.2	8.1	2019-03-12 23:00:00	2019-03-13 14:25:00	2019-03-14 07:00:00	33.7667	101	55.6	7.94198e+06
1092	2019-03-29 13:15:00	2019-03-29 19:29:59	2019-03-30 02:00:00	1.69998	7	1.2	2019-03-29 16:00:00	2019-03-29 20:30:00	2019-03-30 22:00:00	43	51.4	38.7	2119318
1093	2019-04-21 09:08:34	2019-04-21 16:30:05	2019-04-22 03:00:00	3.19779	14.9	0.4	2019-04-21 12:00:00	2019-04-23 01:10:00	2019-04-23 12:00:00	44.2	104	44.8167	1.94049e+07
1094	2019-05-11 13:00:00	2019-05-11 16:29:57	2019-05-11 19:00:00	0.999456	2.4	18.9	2019-05-11 13:00:00	2019-05-11 17:15:00	2019-05-12 13:00:00	28.3583	128	77.7417	1.40151e+07
1095	2019-06-02 10:15:00	2019-06-02 12:30:00	2019-06-02 16:00:00	2.19965	3.3	45.2	2019-06-02 11:00:00	2019-06-03 12:30:00	2019-06-04	393.5	566	462	1.58014e+07
1096	2019-06-03 13:15:00	2019-06-03 14:29:59	2019-06-03 15:00:00	3.29951	3.7	11.2	2019-06-03 16:00:00	2019-06-04 11:15:00	2019-06-05 01:00:00	541.167	736	559.083	2.13978e+07
1097	2019-06-05 10:00:00	2019-06-05 10:30:00	2019-06-05 18:00:00	4.8	12.1	14.9	2019-06-05 10:00:00	2019-06-05 19:45:00	2019-06-06 02:00:00	788.75	912	467.333	1.55409e+07
1098	2019-06-11 16:10:00	2019-06-11 16:40:00	2019-06-11 20:00:00	0.516667	0.8	13.8	2019-06-11 16:25:00	2019-06-11 16:30:00	2019-06-12	545	541	428	156343
1099	2019-06-15 10:20:00	2019-06-15 12:29:59	2019-06-15 14:00:00	9.99993	15.1	2.4	2019-06-15 20:00:00	2019-06-16 07:45:00	2019-06-16 23:00:00	565.917	816	485.5	3.35092e+07
1100	2019-06-16 11:00:00	2019-06-16 13:30:02	2019-06-16 16:00:00	4.79716	6.4	17.8	2019-06-16 11:15:00	2019-06-16 11:15:00	2019-06-16 23:00:00	751	751	485.5	10287.8
1101	2019-06-18 09:10:00	2019-06-18 13:30:03	2019-06-18 18:00:00	4.2959	13.7	36	2019-06-18 10:00:00	2019-06-18 11:20:00	2019-06-18 23:00:00	992.083	1020	692.333	7.21858e+06
1102	2019-06-20 13:03:19	2019-06-22 01:30:01	2019-06-22 05:00:00	2.999	30.2	50.2	2019-06-20 14:00:00	2019-06-21 09:10:00	2019-06-22 16:00:00	1255.83	1670	1307.5	4.05923e+07
1103	2019-06-23 08:08:34	2019-06-23 19:29:58	2019-06-23 20:00:00	1.6995	6.6	64.5	2019-06-23 08:23:34	2019-06-23 08:25:00	2019-06-24 01:00:00	1360	1360	917	4.08024e+06
1104	2019-06-29 18:00:00	2019-06-29 18:30:00	2019-06-29 21:00:00	0.1	0.3	0.1	2019-06-29 19:00:00	2019-06-30 07:20:00	2019-06-30 20:00:00	783.833	1180	848.75	42600693
1105	2019-06-30 11:07:30	2019-06-30 12:30:00	2019-06-30 20:00:00	2.19994	10.5	0.4	2019-06-30 21:00:00	2019-07-01 12:30:00	2019-07-01 20:00:00	858.417	1860	1082.5	5.28122e+07
1106	2019-07-01 13:00:00	2019-07-01 13:30:00	2019-07-01 19:00:00	0.1	0.4	10.8	2019-07-01 21:00:00	2019-07-02 13:35:00	2019-07-02 21:00:00	1097.5	1700	993.5	60207475
1107	2019-07-02 15:30:00	2019-07-02 16:30:03	2019-07-02 18:00:00	2.3989	4	11.3	2019-07-02 15:45:00	2019-07-02 16:00:00	2019-07-02 21:00:00	1210	1210	993.5	788182
1108	2019-07-24 13:12:00	2019-07-24 13:42:00	2019-07-24 20:00:00	0.44	1.3	32.7	2019-07-24 16:00:00	2019-07-25 12:55:00	2019-07-27 04:00:00	87.5917	147	75.3	2.24378e+07
1109	2019-08-03 15:03:19	2019-08-03 15:33:19	2019-08-03 17:00:00	1.80553	2	2.8	2019-08-03 15:18:19	2019-08-03 15:20:00	2019-08-04 13:00:00	214	212	176.167	265559
1110	2019-08-04 13:00:00	2019-08-04 20:30:02	2019-08-05	0.799552	2	4.8	2019-08-04 14:00:00	2019-08-05 12:10:00	2019-08-06 01:00:00	177	343	205.5	5.23942e+06
1111	2019-08-05 12:20:00	2019-08-05 13:29:58	2019-08-05 14:00:00	1.59956	1.9	6.8	2019-08-05 14:00:00	2019-08-06 02:55:00	2019-08-06 08:00:00	236.583	251	211.583	2.02895e+06
1112	2019-08-07 12:00:00	2019-08-07 14:29:56	2019-08-07 15:00:00	2.19879	3.8	8.6	2019-08-07 12:00:00	2019-08-07 12:20:00	2019-08-07 16:00:00	274	277	198.417	93084.4
1113	2019-08-08 13:00:00	2019-08-08 14:29:55	2019-08-08 15:00:00	1.69813	2.1	11.1	2019-08-08 13:00:00	2019-08-09 12:45:00	2019-08-09 19:00:00	200.667	250	192.333	5.09221e+06
1114	2019-08-30 14:30:00	2019-08-30 16:29:58	2019-08-30 17:00:00	0.710869	1	0	2019-08-30 15:00:00	2019-08-30 16:20:00	2019-08-30 19:00:00	195	207	188	441394
1115	2019-09-06 21:03:31	2019-09-06 22:29:55	2019-09-07 02:00:00	2.69883	4.8	10.1	2019-09-06 22:00:00	2019-09-07 11:55:00	2019-09-07 15:00:00	69.2917	124	76.9167	4.35693e+06
1116	2019-09-08 14:10:00	2019-09-08 16:30:01	2019-09-08 23:00:00	4.39924	10.3	14.9	2019-09-08 17:00:00	2019-09-09 13:30:00	2019-09-09 15:00:00	103.967	205	111.917	606587
1117	2019-10-09 19:15:00	2019-10-10 00:30:04	2019-10-10 09:00:00	1.8993	11.1	0	2019-10-10	2019-10-10 19:55:00	2019-10-18 13:00:00	35.1	49.4	33.5417	3.85032e+08
1118	2019-10-23 04:15:00	2019-10-23 13:30:02	2019-10-23 22:00:00	0.999518	4.5	3.2	2019-10-23 05:00:00	2019-10-23 13:50:00	2019-10-30 21:00:00	15.4	38.7	20.75	3.53373e+07
1119	2019-10-27 04:30:00	2019-10-27 17:29:59	2019-10-28 04:00:00	1	11.5	4.8	2019-10-27 06:00:00	2019-10-28	2019-10-29 06:00:00	39.45	57.4	34.2167	5.02207e+06
1120	2019-12-05 03:10:00	2019-12-05 11:30:02	2019-12-05 19:00:00	1.39987	7.9	4	2019-12-05 04:00:00	2019-12-06 12:55:00	2019-12-06 16:00:00	9.74667	98.7	67.2917	592471
1121	2019-12-14 03:30:00	2019-12-14 04:30:03	2019-12-14 21:00:00	0.999498	5.3	1.8	2019-12-14 12:00:00	2019-12-14 17:25:00	2019-12-15 05:00:00	39.1	52.6	39.8	1.11557e+06
1122	2019-12-28 01:00:00	2019-12-28 07:29:55	2019-12-28 13:00:00	1.19948	8.7	0.3	2019-12-28 01:00:00	2019-12-29 12:55:00	2019-12-29 16:00:00	41.6333	47.2	35.9	535144
1123	2020-01-01 07:00:00	2020-01-01 07:30:00	2020-01-01 12:00:00	0.2	0.9	8.7	2020-01-01 11:00:00	2020-01-02 00:55:00	2020-01-03 09:00:00	22.45	41.8	28.9083	4.65646e+06
1124	2020-01-13 10:30:00	2020-01-13 11:00:00	2020-01-13 14:00:00	0.15	0.4	0	2020-01-13 11:00:00	2020-01-14 08:45:00	2020-01-14 14:00:00	24.4667	51.3	23.7083	1.61034e+06
1125	2020-01-17 10:15:00	2020-01-17 10:45:18	2020-01-17 15:00:00	0.4	0.9	0.5	2020-01-17 16:00:00	2020-01-18 08:20:00	2020-01-18 13:00:00	21.7	39.4	17.1917	1.06626e+06
1126	2020-02-03 06:30:00	2020-02-03 17:29:57	2020-02-03 21:00:00	1.69965	6.2	4	2020-02-03 18:00:00	2020-02-04 20:40:00	2020-02-05 01:00:00	24.75	45.5	26.5167	1.34426e+06
1127	2020-02-06 16:20:00	2020-02-06 17:30:04	2020-02-06 23:00:00	1.39973	3.9	6.2	2020-02-06 17:00:00	2020-02-06 21:35:00	2020-02-07 06:00:00	24.2833	34.4	17.8	602250
1128	2020-02-08 18:05:00	2020-02-08 19:30:00	2020-02-08 21:00:00	1.3998	2.8	12.8	2020-02-09 16:00:00	2020-02-09 20:40:00	2020-02-10 11:00:00	12.9083	21.7	18.0583	1.57411e+06
1129	2020-02-09 07:00:00	2020-02-09 10:10:19	2020-02-09 13:00:00	0.4	1.5	9.4	2020-02-09 16:00:00	2020-02-10 09:25:00	2020-02-10 11:00:00	12.9083	33.4	18.0583	1.57411e+06
1130	2020-02-10 13:30:00	2020-02-10 15:29:58	2020-02-11 01:00:00	1.19986	5.7	10.9	2020-02-10 14:00:00	2020-02-11 11:05:00	2020-02-11 14:00:00	23.8	26.8	16.6	344408
1131	2020-02-12 14:07:30	2020-02-12 14:37:30	2020-02-12 18:00:00	0.725	1.5	16.6	2020-02-12 17:00:00	2020-02-12 20:15:00	2020-02-12 23:00:00	14.7083	16.6	15.5	43906.6
1132	2020-02-13 10:30:00	2020-02-13 12:29:58	2020-02-13 13:00:00	0.319891	0.6	11.5	2020-02-13 13:00:00	2020-02-14 08:30:00	2020-02-14 12:00:00	15.4167	38.8	20.35	1.01029e+06
1133	2020-02-16 16:00:00	2020-02-16 23:29:56	2020-02-17 06:00:00	0.499794	1.8	2.2	2020-02-16 16:00:00	2020-02-16 22:35:00	2020-02-17 09:00:00	13.8667	17.5	14.9	226264
1134	2020-02-19 10:00:00	2020-02-19 13:29:57	2020-02-19 15:00:00	0.399796	0.9	2.5	2020-02-19 13:00:00	2020-02-20 11:05:00	2020-02-20 14:00:00	10.7	12.9	9.55333	77349.7
1135	2020-02-24 06:00:00	2020-02-24 07:09:52	2020-02-24 08:00:00	0.7	1.5	1.7	2020-02-24 13:00:00	2020-02-25 02:35:00	2020-02-25 06:00:00	12.675	23	20.05	293959
1136	2020-03-13 09:08:34	2020-03-13 15:29:58	2020-03-14	0.699734	3.6	3.5	2020-03-13 09:23:34	2020-03-13 09:25:00	2020-03-14 08:00:00	10.5	10.5	7.55	41098.1
1137	2020-03-19 04:20:00	2020-03-19 09:30:03	2020-03-19 19:00:00	2.6997	20	7.3	2020-03-19 05:00:00	2020-03-19 21:30:00	2020-03-20 18:00:00	12.2	55.8	28.45	6.68047e+06
1138	2020-03-20 11:12:00	2020-03-20 11:42:00	2020-03-20 13:00:00	0.42	0.6	23.7	2020-03-20 19:00:00	2020-03-20 22:00:00	2020-03-21 13:00:00	31.8167	39.7	8.12	577318
1139	2020-03-22 07:15:00	2020-03-22 09:30:00	2020-03-22 14:00:00	0.39994	1.1	24.3	2020-03-22 08:00:00	2020-03-22 08:10:00	2020-03-23 07:00:00	43.9833	44.5	11.9	12432.2
1140	2020-04-15 13:30:00	2020-04-16 01:29:58	2020-04-16 18:00:00	3.79951	44.4	9	2020-04-15 14:00:00	2020-04-16 10:30:00	2020-04-17 12:00:00	6.145	57.5	9.01	6.76689e+06
1141	2020-04-18 14:10:00	2020-04-18 15:29:59	2020-04-18 17:00:00	0.799999	1.9	46.6	2020-04-18 14:25:00	2020-04-18 15:50:00	2020-04-19 02:00:00	55.6	55.7	26.2583	131933
1142	2020-05-11 16:01:56	2020-05-11 16:31:56	2020-05-11 18:00:00	3.16444	5.2	1.4	2020-05-11 19:00:00	2020-05-12 09:50:00	2020-05-14 02:00:00	198.667	293	191.667	5.31146e+07
1143	2020-05-15 10:00:00	2020-05-15 14:29:58	2020-05-15 17:00:00	4.2986	11.4	11.5	2020-05-15 10:00:00	2020-05-16 11:45:00	2020-05-16 15:00:00	214.667	379	316.5	3.65769e+06
1144	2020-05-24 06:03:45	2020-05-24 06:33:45	2020-05-24 14:00:00	1.575	8	6.9	2020-05-24 07:00:00	2020-05-24 15:05:00	2020-05-25 13:00:00	268.5	333	70.6417	1.1271e+07
1145	2020-05-24 20:20:00	2020-05-24 21:29:58	2020-05-24 22:00:00	1.69953	2	14.9	2020-05-24 20:35:00	2020-05-24 20:35:00	2020-05-25 13:00:00	217	212	70.6417	361350
1146	2020-05-27 14:08:34	2020-05-27 16:29:59	2020-05-27 19:00:00	0.699927	2.1	10.5	2020-05-28 05:00:00	2020-05-28 13:50:00	2020-05-28 22:00:00	7.60583	240	84.925	1.78423e+07
1147	2020-05-28 17:00:00	2020-05-28 18:29:55	2020-05-28 19:00:00	0.899848	1.7	12.6	2020-05-28 23:00:00	2020-05-29 09:05:00	2020-05-29 23:00:00	87.2083	638	311.5	4.87759e+07
1148	2020-05-29 14:00:00	2020-05-29 14:30:00	2020-05-29 19:00:00	0.7	1.3	14.3	2020-05-30	2020-05-30 09:15:00	2020-05-30 19:00:00	321.5	1510	524.917	7.50278e+07
1149	2020-05-30 11:30:00	2020-05-30 19:29:59	2020-05-30 20:00:00	1.90238	2.6	7.1	2020-05-30 20:00:00	2020-05-31 12:20:00	2020-05-31 16:00:00	528.25	1740	893.167	5.34773e+07
1150	2020-06-02 16:30:00	2020-06-02 19:29:59	2020-06-02 20:00:00	0.311108	0.6	9.5	2020-06-03	2020-06-03 07:50:00	2020-06-03 21:00:00	766.083	1250	676	6.35617e+07
1151	2020-06-19 11:30:00	2020-06-19 12:29:57	2020-06-19 13:00:00	1.59906	1.8	4.1	2020-06-19 13:00:00	2020-06-19 21:40:00	2020-06-20 11:00:00	260.167	476	355.833	1.9845e+07
1152	2020-07-05 12:00:00	2020-07-05 15:30:03	2020-07-05 21:00:00	1.60282	2.4	5.7	2020-07-05 12:15:00	2020-07-05 12:25:00	2020-07-05 23:00:00	316	319	228.917	85536.9
1153	2020-07-13 13:00:00	2020-07-13 14:30:01	2020-07-13 17:00:00	0.711109	1.4	0	2020-07-13 13:00:00	2020-07-14 11:10:00	2020-07-16 19:00:00	66.0417	159	45.35	5.59834e+07
1154	2020-07-25 08:15:00	2020-07-25 10:29:54	2020-07-25 12:00:00	2.79705	6	5.9	2020-07-25 11:00:00	2020-07-25 11:30:00	2020-07-25 20:00:00	82.2167	84.3	68.3	19738.8
1155	2020-07-26 10:12:00	2020-07-26 10:42:00	2020-07-26 15:00:00	0.405714	0.7	10.9	2020-07-26 11:00:00	2020-07-26 19:20:00	2020-07-26 22:00:00	70.9667	103	59.1083	759102
1156	2020-07-28 10:30:00	2020-07-28 11:29:57	2020-07-28 18:00:00	0.499799	1.4	11.2	2020-07-28 11:00:00	2020-07-29 16:10:00	2020-07-29 21:00:00	68.9333	105	50.6667	7940575
1157	2020-07-30 15:30:00	2020-07-30 17:29:58	2020-07-30 19:00:00	0.999796	2.1	8.1	2020-07-30 18:00:00	2020-07-31 11:40:00	2020-07-31 20:00:00	65.4917	118	57.1333	7.47159e+06
1158	2020-08-01 17:10:00	2020-08-01 17:40:00	2020-08-01 21:00:00	0.533333	0.9	5.7	2020-08-01 22:00:00	2020-08-02 18:40:00	2020-08-02 20:00:00	74.95	171	66.6583	3.33162e+06
1159	2020-08-19 11:06:00	2020-08-19 11:36:00	2020-08-19 18:00:00	0.970039	2	0	2020-08-19 13:00:00	2020-08-20 11:45:00	2020-08-25 16:00:00	55.8417	110	67.2083	5.90406e+07
1160	2020-08-20 12:20:00	2020-08-20 17:34:58	2020-08-20 19:00:00	1.10829	1.6	2	2020-08-20 17:00:00	2020-08-21 19:00:00	2020-08-22 11:00:00	94.95	162	95.5083	1.59712e+07
1161	2020-08-25 11:20:00	2020-08-25 11:50:00	2020-08-25 16:00:00	0.208333	0.4	1.6	2020-08-25 11:35:00	2020-08-25 11:35:00	2020-08-25 19:00:00	70.9	70.9	64.6	27542
1162	2020-08-26 13:04:36	2020-08-26 13:34:36	2020-08-26 15:00:00	1.31533	1.6	0.4	2020-08-26 15:00:00	2020-08-27 10:45:00	2020-08-27 18:00:00	63.5	70.5	41.3333	2.26413e+06
1163	2020-08-27 12:06:39	2020-08-27 13:29:57	2020-08-27 14:00:00	15.2895	16.2	2	2020-08-27 19:00:00	2020-08-28 14:00:00	2020-08-30 20:00:00	50.8583	86.6	51.85	1.92263e+07
1164	2020-08-28 15:04:17	2020-08-28 15:34:17	2020-08-28 17:00:00	1.36441	2.4	18.2	2020-08-28 18:00:00	2020-08-28 21:00:00	2020-08-29	77.5083	89.5	79.5	142121
1165	2020-08-29 17:04:17	2020-08-29 17:34:17	2020-08-29 19:00:00	1.4	2.8	21	2020-08-29 19:00:00	2020-08-30 10:20:00	2020-08-30 16:00:00	79.025	129	60.425	1.81214e+06
1166	2020-09-09 07:00:00	2020-09-09 07:30:00	2020-09-09 09:00:00	0.6	0.8	30.8	2020-09-09 07:00:00	2020-09-09 13:05:00	2020-09-10 08:00:00	36.3833	50.7	31.4667	1.47517e+06
1167	2020-09-10 19:10:00	2020-09-10 20:29:59	2020-09-10 22:00:00	1.9	2.9	31.6	2020-09-11 08:00:00	2020-09-11 13:55:00	2020-09-11 23:00:00	28.5333	40.5	31	692409
1168	2020-09-11 13:03:45	2020-09-11 13:33:45	2020-09-11 15:00:00	1.5125	1.8	34.5	2020-09-11 14:00:00	2020-09-12 09:20:00	2020-09-12 17:00:00	40.425	45.1	40.45	223132
1169	2020-12-10 22:00:00	2020-12-11 09:47:51	2020-12-11 12:00:00	0.4	2.1	0	2020-12-10 23:00:00	2020-12-11 21:45:00	2020-12-12 10:00:00	42.7	47.3	29.6	2.15377e+06
1170	2021-01-25 07:30:00	2021-01-25 16:30:01	2021-01-27 02:00:00	0.69991	6.3	0.5	2021-01-25 08:00:00	2021-01-25 08:15:00	2021-01-27 17:00:00	23.8667	24.1	22.1	10923.7
1171	2021-02-12 12:00:00	2021-02-13 14:30:00	2021-02-14 06:00:00	0.599954	7.1	1.1	2021-02-12 12:15:00	2021-02-13 02:30:00	2021-02-15 05:00:00	27.3	28.6	25.8	11572.1
1172	2021-02-16 12:00:00	2021-02-16 14:30:02	2021-02-16 19:00:00	0.499934	1.7	8.2	2021-02-16 12:00:00	2021-02-17 18:45:00	2021-02-20 09:00:00	30.4667	46.2	40.5417	1.11414e+07
1173	2021-02-17 11:30:00	2021-02-17 17:29:57	2021-02-18 05:00:00	1.49993	11.6	9.5	2021-02-17 12:00:00	2021-02-18 19:50:00	2021-02-19 06:00:00	35.3417	61.4	49.8417	4.19533e+06
1174	2021-03-09 22:10:00	2021-03-10 03:29:58	2021-03-10 09:00:00	1.8999	8.2	2.4	2021-03-10 02:00:00	2021-03-11 00:25:00	2021-03-11 06:00:00	7.31	11.5	8.7	147187
1175	2021-03-11 11:30:00	2021-03-11 22:29:57	2021-03-12 01:00:00	0.499858	2.3	8.2	2021-03-11 17:00:00	2021-03-12 09:40:00	2021-03-12 21:00:00	12.7917	19.2	13.675	687830
1176	2021-03-13 10:00:00	2021-03-14 02:29:54	2021-03-14 22:00:00	5.89732	99.5	10.5	2021-03-13 13:00:00	2021-03-15 07:35:00	2021-03-15 11:00:00	19.85	56.4	39.05	3.33503e+06
1177	2021-03-16 08:15:00	2021-03-16 12:30:02	2021-03-16 19:00:00	1.39975	6.5	101.8	2021-03-16 11:00:00	2021-03-17 08:55:00	2021-03-17 18:00:00	17.775	38.2	18.1083	2.11046e+06
1178	2021-03-26 12:20:00	2021-03-26 16:48:34	2021-03-27 01:00:00	0.8	5.1	26.1	2021-03-26 13:00:00	2021-03-27 07:20:00	2021-03-27 16:00:00	27.725	51.2	14.3417	1.52772e+06
1179	2021-04-23 11:06:39	2021-04-23 14:29:59	2021-04-23 20:00:00	1.09998	5.8	16.2	2021-04-23 11:21:39	2021-04-23 11:25:00	2021-04-24 02:00:00	21.2	21.2	20	15718.6
1180	2021-04-27 09:30:00	2021-04-27 20:30:03	2021-04-28 04:00:00	4.7967	31.6	8	2021-04-27 13:00:00	2021-04-28 02:10:00	2021-04-28 07:00:00	19.5	34.4	24.675	952082
1181	2021-05-05 07:00:00	2021-05-05 09:34:56	2021-05-05 12:00:00	1.12482	2.2	48.6	2021-05-05 07:00:00	2021-05-05 11:30:00	2021-05-05 14:00:00	1411.67	1460	1416.67	804214
1182	2021-05-17 12:30:00	2021-05-17 16:30:01	2021-05-18 03:00:00	0.499904	3.2	11.9	2021-05-17 16:00:00	2021-05-19 03:00:00	2021-05-19 22:00:00	1317.5	1600	1155.83	1.21913e+08
1183	2021-05-19 11:00:00	2021-05-19 14:30:03	2021-05-19 16:00:00	0.499802	1.1	15.1	2021-05-19 11:15:00	2021-05-19 11:35:00	2021-05-19 22:00:00	1830	1780	1155.83	6.94695e+06
1184	2021-05-20 12:00:00	2021-05-20 14:29:56	2021-05-20 15:00:00	1.79909	2.4	16	2021-05-20 18:00:00	2021-05-21 05:20:00	2021-05-21 21:00:00	1047.5	1740	1150	7.18444e+07
1185	2021-05-22 15:10:00	2021-05-23 00:29:57	2021-05-23 03:00:00	2.99824	13.3	6.7	2021-05-22 19:00:00	2021-05-23 10:15:00	2021-05-23 18:00:00	1255	2750	2185.83	9.93167e+07
1186	2021-06-01 13:15:00	2021-06-01 16:29:55	2021-06-01 18:00:00	1.69988	4.7	35.7	2021-06-01 13:30:00	2021-06-01 13:30:00	2021-06-01 23:00:00	1080	1090	804.167	467525
1187	2021-06-05 12:10:00	2021-06-05 13:29:59	2021-06-05 17:00:00	2.99999	4.1	4.7	2021-06-05 18:00:00	2021-06-06 07:10:00	2021-06-06 21:00:00	1145.83	1720	1213.33	6.96621e+07
1188	2021-06-06 13:30:00	2021-06-06 17:30:55	2021-06-06 19:00:00	6.2108	9.5	9	2021-06-06 22:00:00	2021-06-07 07:50:00	2021-06-07 19:00:00	1223.33	2010	1275.83	8.87987e+07
1189	2021-06-23 23:20:00	2021-06-24 00:29:58	2021-06-24 02:00:00	0.599899	1	6.3	2021-06-24 06:00:00	2021-06-25 01:05:00	2021-06-28 04:00:00	211.25	267	223.917	1.90263e+08
1190	2021-06-24 16:00:00	2021-06-24 17:30:01	2021-06-25	0.299934	0.8	7.3	2021-06-24 17:00:00	2021-06-25 18:50:00	2021-06-25 23:00:00	249.417	560	471.083	8.15833e+06
1191	2021-06-25 12:01:42	2021-06-25 14:30:02	2021-06-25 23:00:00	5.09897	26.9	8.1	2021-06-25 13:00:00	2021-06-26 07:35:00	2021-06-26 11:00:00	389.083	743	578.167	1.19995e+07
1192	2021-07-01 10:08:34	2021-07-01 14:30:43	2021-07-01 17:00:00	7.97688	15.9	37.3	2021-07-01 12:00:00	2021-07-01 21:30:00	2021-07-02 02:00:00	306.75	615	350.667	5.54292e+06
1193	2021-07-02 14:01:13	2021-07-02 14:31:13	2021-07-02 16:00:00	4.82433	6.1	25.6	2021-07-03 01:00:00	2021-07-03 14:20:00	2021-07-03 22:00:00	34.9417	217	33.2583	5.80887e+06
1194	2021-07-04 09:30:00	2021-07-04 12:29:59	2021-07-04 13:00:00	2.79998	5.2	24.2	2021-07-04 19:00:00	2021-07-05 09:45:00	2021-07-05 14:00:00	211.5	379	217.667	2.13606e+07
1195	2021-07-13 12:07:30	2021-07-13 12:37:30	2021-07-13 14:00:00	0.7375	1.1	1.5	2021-07-13 21:00:00	2021-07-14 13:50:00	2021-07-19 18:00:00	27.3	44.3	23.5667	65723625
1196	2021-07-14 14:03:31	2021-07-14 14:33:31	2021-07-14 19:00:00	1.60271	3.1	2.6	2021-07-14 15:00:00	2021-07-14 23:00:00	2021-07-16 10:00:00	49.7667	66.3	51.95	4.51875e+06
1197	2021-07-15 13:15:00	2021-07-15 15:29:54	2021-07-15 16:00:00	1.90189	2.4	5.7	2021-07-15 13:30:00	2021-07-15 13:30:00	2021-07-15 17:00:00	66.3	65.1	60.3	0
1198	2021-07-16 13:08:34	2021-07-16 13:38:34	2021-07-16 15:00:00	0.628556	0.9	6.6	2021-07-16 17:00:00	2021-07-17 00:30:00	2021-07-18 13:00:00	64.9167	127	56.9	2.38693e+07
1199	2021-07-21 08:30:00	2021-07-21 13:30:02	2021-07-21 16:00:00	7.29528	8.4	5.3	2021-07-21 08:45:00	2021-07-21 08:45:00	2021-07-22 05:00:00	421	434	19	30361.1
1200	2021-07-22 10:00:00	2021-07-22 11:38:32	2021-07-22 16:00:00	0.656956	1.3	11.3	2021-07-22 15:00:00	2021-07-23 14:15:00	2021-07-27 16:00:00	29.0833	207	54.8	1.19403e+08
1201	2021-07-23 11:01:06	2021-07-23 11:31:06	2021-07-23 15:00:00	5.32568	8.4	11.7	2021-07-23 13:00:00	2021-07-24 13:55:00	2021-07-25 02:00:00	123.242	244	139.333	2.25652e+07
1202	2021-07-30 12:04:17	2021-07-30 13:29:59	2021-07-30 19:00:00	4.99967	9.8	0.5	2021-07-30 13:00:00	2021-07-31 04:10:00	2021-08-01 16:00:00	121.483	251	125.333	3.91789e+07
1203	2021-07-31 12:03:09	2021-07-31 13:29:57	2021-07-31 14:00:00	3.69891	5.6	10.7	2021-07-31 15:00:00	2021-08-01 07:10:00	2021-08-01 16:00:00	206.5	345	125.333	17206940
1204	2021-08-06 12:08:34	2021-08-06 18:29:58	2021-08-06 19:00:00	2.40257	3.6	14.9	2021-08-06 13:00:00	2021-08-07 08:35:00	2021-08-07 10:00:00	125.192	545	202.5	2.93488e+06
1205	2021-08-17 12:00:00	2021-08-17 14:30:02	2021-08-17 17:00:00	2.79818	3.2	0.2	2021-08-17 13:00:00	2021-08-17 14:05:00	2021-08-17 18:00:00	48.575	56.5	36.7333	149894
1206	2021-08-19 14:00:00	2021-08-19 17:29:57	2021-08-19 18:00:00	4.09824	6	11.3	2021-08-19 15:00:00	2021-08-20 14:15:00	2021-08-22 04:00:00	22.9	122	45.0667	2.57821e+07
1207	2021-09-01 16:06:39	2021-09-01 17:29:57	2021-09-02 02:00:00	1.49939	5	1.2	2021-09-01 20:00:00	2021-09-02 22:40:00	2021-09-06 03:00:00	6.31417	24.6	9.09	1.74849e+07
1208	2021-09-03 10:06:39	2021-09-03 10:36:39	2021-09-03 17:00:00	0.944333	1.9	5.8	2021-09-03 13:00:00	2021-09-04 06:25:00	2021-09-04 18:00:00	30.4333	72.6	13.525	3.84369e+06
