# Supplementary material for: Leveraging a time-series event separation method to disentangle time-varying hydrologic controls on streamflow – application to wildfire-affected catchments
Source: Copernicus journal article supplement (doi:10.5194/hess-29-27-2025), 2025-01-03
Supplement: Supplementary file 2 [file ArroyoSeco_EventAttributes.xlsx]

## Sheet: Events_Sorting - Copy
	storm_start	storm_peak	storm_end	storm_peak_60int_mm/hr	storm_depth_mm	antPrecip_mm	flow_start	flow_peak	flow_end	flow_start_mag_cfs	flow_peak_mag_cfs	flow_end_mag_cfs	volume_ft3
1	1988-11-13 21:30:00	1988-11-14 03:29:57	1988-11-14 04:00:00	12.2976	37.5	0	1988-11-13 23:00:00	1988-11-14 07:30:00	1988-11-14 12:00:00	0.9125	12	5.7	99285.1
2	1988-12-15 00:00:32	1988-12-15 03:30:17	1988-12-16 20:00:00	16.3003	119.4	0	1988-12-15 10:00:00	1988-12-16 08:45:00	1988-12-17 14:00:00	1.2	155	12	5.85056e+06
3	1988-12-18 12:00:00	1988-12-18 16:29:58	1988-12-18 18:00:00	0.699895	2.1	129	1988-12-18 12:00:00	1988-12-18 13:15:00	1988-12-19 15:00:00	8.225	9.3	5.4	25519.8
4	1988-12-20 15:30:00	1988-12-21 00:30:01	1988-12-21 06:00:00	10.2978	31.8	136.8	1988-12-20 18:00:00	1988-12-21 06:00:00	1988-12-22 04:00:00	4.4	98	17	3.01589e+06
5	1988-12-24 11:00:00	1988-12-24 15:29:58	1988-12-24 21:00:00	1.89986	8.2	49.1	1988-12-24 13:00:00	1988-12-25 00:30:00	1988-12-25 18:00:00	6.75	35	16	1.09084e+06
6	1989-01-02 05:00:00	1989-01-03 00:57:43	1989-01-03 04:00:00	0.1	2.4	9.5	1989-01-02 05:15:00	1989-01-02 05:15:00	1989-01-03 05:00:00	4.5	4.5	3.7	11070.9
7	1989-01-03 23:30:00	1989-01-04 03:30:01	1989-01-04 13:00:00	2.69923	6	11.3	1989-01-03 23:45:00	1989-01-04 05:15:00	1989-01-05 03:00:00	4.1	4.3	4.1	10620
8	1989-01-05 05:00:00	1989-01-05 17:29:56	1989-01-05 22:00:00	2.39978	13.5	8.5	1989-01-05 16:00:00	1989-01-06 01:30:00	1989-01-06 07:00:00	4.3	13	10	76675.5
9	1989-02-01 21:00:00	1989-02-02 01:29:58	1989-02-02 14:00:00	0.399965	4	0	1989-02-02	1989-02-02 14:20:00	1989-02-02 16:00:00	2.25	2.6	2.4	1029.47
10	1989-02-02 19:00:00	1989-02-04 01:29:59	1989-02-04 16:00:00	4.89987	56.5	4	1989-02-03 22:00:00	1989-02-04 15:37:00	1989-02-04 23:00:00	2.625	31	23	187802
11	1989-02-07 19:00:00	1989-02-08 03:29:57	1989-02-09 21:00:00	3.39985	69.2	60.5	1989-02-08 10:00:00	1989-02-09 00:26:00	1989-02-10 06:00:00	11.25	87	26	3.83142e+06
12	1989-03-01 18:10:00	1989-03-02 02:30:02	1989-03-02 23:00:00	1.59987	11.2	0	1989-03-02 05:00:00	1989-03-02 13:45:00	1989-03-03 08:00:00	4.7	8.6	5.4	160270
13	1989-03-24 04:15:00	1989-03-24 06:29:54	1989-03-24 10:00:00	1.19945	5.2	0	1989-03-24 08:00:00	1989-03-25 10:00:00	1989-03-26 17:00:00	2.9	4.7	3.5	221256
14	1989-03-24 18:30:00	1989-03-25 08:29:54	1989-03-26 04:00:00	2.2984	21.2	5.2	1989-03-25 01:00:00	1989-03-25 14:15:00	1989-03-26 05:00:00	2.9	6.9	4.7	115529
15	1990-01-14 11:00:00	1990-01-14 16:29:59	1990-01-14 18:00:00	1	4.2	78.6	1990-01-14 11:15:00	1990-01-14 11:15:00	1990-01-16 01:00:00	19	18	3	0
16	1990-01-15 04:00:00	1990-01-15 13:30:04	1990-01-15 17:00:00	0.6	4.7	82.8	1990-01-15 04:15:00	1990-01-15 04:15:00	1990-01-16 01:00:00	6.1	6.1	3	259.157
17	1990-01-16 07:00:00	1990-01-16 20:30:03	1990-01-17 08:00:00	5.79871	24.8	87.5	1990-01-16 13:00:00	1990-01-17 00:45:00	1990-01-18 05:00:00	2.95	16	4.7	592065
18	1990-02-13 12:00:00	1990-02-13 12:30:00	1990-02-13 15:00:00	0.1	0.4	0	1990-02-13 12:15:00	1990-02-13 22:15:00	1990-02-14	0.99	1.1	0.99	198
19	1990-02-15 05:00:00	1990-02-16 00:57:43	1990-02-16 04:00:00	0.1	2.4	0.4	1990-02-16 21:00:00	1990-02-17 04:00:00	1990-02-21 17:00:00	1.175	6.4	4.9	7.97889e+06
20	1990-02-16 18:00:00	1990-02-17 02:29:57	1990-02-17 21:00:00	10.4998	107	2.8	1990-02-16 21:00:00	1990-02-17 15:15:00	1990-02-19 05:00:00	1.175	163	12	6.32235e+06
21	1991-02-27 02:01:56	1991-02-27 03:29:56	1991-03-01 17:00:00	30.2763	319	0	1991-02-27 12:00:00	1991-03-01 05:15:00	1991-03-02 07:00:00	0.635	921	27.25	3.13088e+07
22	1991-03-15 14:00:00	1991-03-15 15:29:55	1991-03-15 17:00:00	0.599866	1.3	37.6	1991-03-15 14:15:00	1991-03-15 14:15:00	1991-03-15 18:00:00	4.9	5.2	4.7	567
23	1991-03-18 17:00:00	1991-03-18 22:29:59	1991-03-19 08:00:00	18.8932	100.1	26.4	1991-03-18 21:00:00	1991-03-19 03:30:00	1991-03-19 23:00:00	3.4	126	32.5	3.62212e+06
24	1991-03-19 14:12:00	1991-03-20 03:30:01	1991-03-20 19:00:00	21.8882	42.5	113.4	1991-03-20 03:00:00	1991-03-20 08:45:00	1991-03-21 17:00:00	31	108	29.75	3.41414e+06
25	1991-03-25	1991-03-25 03:29:57	1991-03-25 19:00:00	20.4981	71.3	42.5	1991-03-25 01:00:00	1991-03-25 06:00:00	1991-03-26 02:00:00	16.25	97	32	2.41659e+06
26	1991-03-26 10:30:00	1991-03-26 18:29:41	1991-03-27 07:00:00	17.9	92	72	1991-03-26 15:00:00	1991-03-26 21:45:00	1991-03-27 11:00:00	27.75	439	98.75	8.95715e+06
27	1991-12-27 21:00:00	1991-12-27 23:29:56	1991-12-30 04:00:00	10.199	107	0	1991-12-27 22:00:00	1991-12-29 18:00:00	1991-12-31 08:00:00	0.8525	131	4.85	4.11878e+06
28	1992-01-02 20:12:00	1992-01-03 00:29:57	1992-01-03 13:00:00	3.2986	17.3	107	1992-01-03 10:00:00	1992-01-03 21:00:00	1992-01-04 23:00:00	2	16	4.3	596895
29	1992-01-04 17:00:00	1992-01-05 03:29:59	1992-01-06 05:00:00	20.0995	62.6	17.3	1992-01-05 02:00:00	1992-01-05 13:30:00	1992-01-07 02:00:00	4.25	294	16	7.98041e+06
30	1992-02-08 21:20:00	1992-02-10 00:29:59	1992-02-13 08:00:00	17.1998	381.7	85.2	1992-02-09 21:00:00	1992-02-11 06:45:00	1992-02-13 11:00:00	10.725	1670	182.5	1.00075e+08
31	1992-03-01 17:12:00	1992-03-02 06:30:01	1992-03-03 02:00:00	8.6993	87.4	0	1992-03-02 08:00:00	1992-03-02 22:15:00	1992-03-03 21:00:00	23	218	70	8.04655e+06
32	1992-03-20 00:01:30	1992-03-20 02:32:08	1992-03-21 18:00:00	12.1	122.1	0	1992-03-20 04:00:00	1992-03-21 12:15:00	1992-03-21 20:00:00	28.25	192	96	3.05288e+06
33	1992-03-22	1992-03-22 21:30:00	1992-03-23 04:00:00	7.29945	55.7	122.1	1992-03-22 05:00:00	1992-03-23 07:30:00	1992-03-23 11:00:00	86.5	439	230	4594665
34	1992-03-26 03:00:00	1992-03-27 03:29:58	1992-03-27 18:00:00	8.19743	47.5	55.7	1992-03-26 07:00:00	1992-03-27 07:00:00	1992-03-27 22:00:00	95	134	110.5	627704
35	1992-05-04 21:05:00	1992-05-05 03:30:00	1992-05-05 14:00:00	3.69959	11.9	0	1992-05-05 01:00:00	1992-05-05 20:00:00	1992-05-06 09:00:00	14	23	16	259988
36	1992-10-20 05:00:00	1992-10-21 00:57:43	1992-10-21 04:00:00	0.1	2.4	0	1992-10-20 05:15:00	1992-10-21 03:45:00	1992-10-22 15:00:00	1.2	1.2	1.1	10890.4
37	1992-10-21 10:00:00	1992-10-21 15:29:59	1992-10-21 16:00:00	0.599998	1.5	2.4	1992-10-21 10:15:00	1992-10-22 09:45:00	1992-10-22 12:00:00	1.2	1.3	1.2	630
38	1992-10-24 06:00:00	1992-10-24 10:45:18	1992-10-24 19:00:00	0.3	2	29.6	1992-10-24 09:00:00	1992-10-24 10:15:00	1992-10-24 22:00:00	1.8	2	1.6	3361.15
39	1992-10-27 10:30:00	1992-10-27 11:00:00	1992-10-27 12:00:00	0.15	0.3	27.7	1992-10-27 10:45:00	1992-10-27 10:45:00	1992-10-27 13:00:00	1.7	1.7	1.6	60
40	1992-10-28 02:00:00	1992-10-30 03:29:58	1992-10-30 12:00:00	6.59791	47.4	28	1992-10-30 01:00:00	1992-10-30 14:45:00	1992-10-31 23:00:00	1.825	231	4.9	4.65306e+06
41	1992-12-03 04:30:00	1992-12-03 18:29:54	1992-12-04 04:00:00	1.09986	10.5	0	1992-12-03 04:45:00	1992-12-03 14:45:00	1992-12-04 09:00:00	1.9	2	1.9	4590
42	1992-12-05 20:15:00	1992-12-05 23:30:19	1992-12-06 04:00:00	1.7	9.7	10.6	1992-12-06 23:00:00	1992-12-07 04:00:00	1992-12-09 20:00:00	2.325	10	6.6	8.41681e+06
43	1992-12-06 16:00:00	1992-12-06 21:29:59	1992-12-08	13.7999	101.7	20.3	1992-12-06 23:00:00	1992-12-07 09:00:00	1992-12-08 20:00:00	2.325	224	12	7.58199e+06
44	1992-12-26 04:30:00	1992-12-27 00:52:04	1992-12-27 04:00:00	0.2	4.8	0	1992-12-27 19:00:00	1992-12-28 04:00:00	1992-12-28 21:00:00	3.7	8.3	5.9	223216
45	1992-12-27 17:30:00	1992-12-29 00:30:03	1992-12-31 04:00:00	7.8997	90.4	4.8	1992-12-27 19:00:00	1992-12-29 10:45:00	1992-12-31 15:00:00	3.7	329	23	1.57586e+07
46	1993-01-05 15:20:00	1993-01-06 04:30:01	1993-01-08	8.09964	226.7	15.5	1993-01-06 02:00:00	1993-01-07 21:45:00	1993-01-08 19:00:00	9.45	1490	139.25	4.78879e+07
47	1993-01-09 20:00:00	1993-01-10 03:29:56	1993-01-10 09:00:00	1.29944	7.7	230.5	1993-01-09 20:15:00	1993-01-09 20:15:00	1993-01-10 15:00:00	89	87	69	1560
48	1993-01-10 14:20:00	1993-01-10 14:50:00	1993-01-10 16:00:00	0.233333	0.4	238.2	1993-01-10 17:00:00	1993-01-10 17:30:00	1993-01-11 16:00:00	69.25	70	47.25	16268.5
49	1993-02-07 03:00:37	1993-02-07 21:29:58	1993-02-09 03:00:00	17.998	134.9	0	1993-02-07 14:00:00	1993-02-08 16:00:00	1993-02-09 07:00:00	30.5	569	153.75	1.66537e+07
50	1993-02-17 04:03:00	1993-02-18 12:30:01	1993-02-20 14:00:00	11.2	216	11.4	1993-02-17 11:00:00	1993-02-18 22:30:00	1993-02-20 20:00:00	61.5	1680	423.25	8.38956e+07
51	1993-02-21 10:00:00	1993-02-21 15:30:05	1993-02-21 20:00:00	0.999667	5	216.2	1993-02-21 11:00:00	1993-02-21 11:30:00	1993-02-22	336.25	358	272.5	866064
52	1993-02-22 11:00:00	1993-02-23 03:29:54	1993-02-23 19:00:00	4.39916	44.7	221.2	1993-02-22 12:00:00	1993-02-23 13:30:00	1993-02-24 03:00:00	266.25	705	356.75	1.01137e+07
53	1993-03-13 18:00:00	1993-03-13 20:29:56	1993-03-14 02:00:00	0.399899	1.5	0	1993-03-14 06:00:00	1993-03-14 06:45:00	1993-03-14 08:00:00	62.5	64	62	1518.75
54	1993-10-10 17:30:00	1993-10-10 21:59:34	1993-10-11 02:00:00	1.6	8.4	0	1993-10-11	1993-10-11 12:00:00	1993-10-14 18:00:00	2.5	3.5	2.6	123710
55	1993-11-10 20:30:00	1993-11-11 03:29:58	1993-11-11 04:00:00	6.89781	13.5	0	1993-11-11 02:00:00	1993-11-11 04:45:00	1993-11-11 15:00:00	2.85	5.9	4.15	63315
56	1993-11-29 22:15:00	1993-11-30 00:30:00	1993-11-30 04:00:00	7.79897	17.2	0	1993-11-30	1993-11-30 03:45:00	1993-11-30 12:00:00	3.45	9.6	5.2	104860
57	1993-12-11 11:15:00	1993-12-11 13:30:00	1993-12-11 20:00:00	1.09994	3.3	14.4	1993-12-11 13:00:00	1993-12-11 17:15:00	1993-12-11 23:00:00	3.175	13	8.45	112170
58	1993-12-14 12:30:00	1993-12-14 15:30:05	1993-12-14 19:00:00	1.89866	5.9	27.3	1993-12-14 15:00:00	1993-12-14 19:15:00	1993-12-15 01:00:00	4.625	10	7.7	71228.8
59	1994-01-23 06:08:34	1994-01-23 07:38:47	1994-01-23 09:00:00	0.7	2.1	0	1994-01-23 20:00:00	1994-01-23 20:45:00	1994-01-24 16:00:00	4.575	4.8	4.7	10992.7
60	1994-01-24 13:00:00	1994-01-24 22:29:58	1994-01-26 04:00:00	6.59819	24.2	3.5	1994-01-24 21:00:00	1994-01-25 01:45:00	1994-01-26 05:00:00	4.875	8.3	6.4	172641
61	1994-02-06 20:30:00	1994-02-07 00:29:55	1994-02-08 04:00:00	5.09711	64.4	31.5	1994-02-06 22:00:00	1994-02-07 22:00:00	1994-02-09 05:00:00	5.2	129	14	4861278
62	1994-02-17 01:30:00	1994-02-17 03:29:58	1994-02-17 15:00:00	13.497	26	0	1994-02-17 06:00:00	1994-02-17 13:30:00	1994-02-18 07:00:00	5.35	9.3	7.2	150069
63	1994-02-18 07:00:00	1994-02-18 16:29:58	1994-02-19 01:00:00	1.09982	7.8	26	1994-02-18 15:00:00	1994-02-18 23:45:00	1994-02-19 04:00:00	6.825	7.7	7.4	8498.51
64	1994-02-19 23:06:39	1994-02-20 03:30:00	1994-02-20 09:00:00	11.9969	37.4	33.9	1994-02-20 02:00:00	1994-02-20 10:15:00	1994-02-21 06:00:00	6.4	35	13	1.02239e+06
65	1994-03-05 21:30:00	1994-03-06 02:30:02	1994-03-07 08:00:00	2.89994	19.6	0	1994-03-06	1994-03-06 19:15:00	1994-03-07 11:00:00	5.5	22	8.6	259862
66	1994-03-19 02:00:00	1994-03-19 03:30:01	1994-03-20 10:00:00	14.096	34.6	0	1994-03-19 03:00:00	1994-03-19 22:00:00	1994-03-20 15:00:00	4.7	12	6.9	193176
67	1994-03-24 12:30:00	1994-03-24 17:30:02	1994-03-24 23:00:00	11.9985	45.9	45.6	1994-03-24 16:00:00	1994-03-24 23:45:00	1994-03-25 16:00:00	5.75	45	12.25	964028
68	1994-04-23 18:00:00	1994-04-24 08:31:40	1994-04-24 11:00:00	3.6542	9.4	0	1994-04-24 03:00:00	1994-04-24 03:15:00	1994-04-24 13:00:00	3.45	3.5	3.3	3622.5
69	1994-04-25 08:20:00	1994-04-25 11:29:55	1994-04-25 19:00:00	2.89903	10.2	9.4	1994-04-25 11:00:00	1994-04-26 15:45:00	1994-04-27 05:00:00	3.4	11	5.2	184690
70	1994-05-05 04:05:27	1994-05-05 04:35:27	1994-05-05 08:00:00	1.07267	2.9	0	1994-05-06	1994-05-06 07:00:00	1994-05-07 15:00:00	3.2	3.5	3	97381.2
71	1994-05-05 19:15:00	1994-05-05 21:00:51	1994-05-06 03:00:00	0.4	1.7	2.9	1994-05-06	1994-05-06 20:00:00	1994-05-07 15:00:00	3.2	4.3	3	97381.2
72	1994-05-16 04:08:34	1994-05-16 06:30:05	1994-05-16 08:00:00	1.89895	5.1	0	1994-05-16 04:23:34	1994-05-16 04:30:00	1994-05-16 17:00:00	3.5	3.5	3.3	3729.6
73	1994-05-17 12:00:00	1994-05-17 16:30:04	1994-05-17 19:00:00	1.39881	5.7	6.6	1994-05-17 14:00:00	1994-05-17 19:00:00	1994-05-19 01:00:00	3.775	8.3	4.8	251748
74	1994-11-07 18:30:00	1994-11-07 21:09:21	1994-11-08 09:00:00	0.6	3.8	1	1994-11-07 20:00:00	1994-11-08 06:00:00	1994-11-08 15:00:00	1.6	1.8	1.7	4195.66
75	1994-11-09 20:05:00	1994-11-10 03:30:01	1994-11-10 10:00:00	22.3896	29.6	3.8	1994-11-10 06:00:00	1994-11-10 13:30:00	1994-11-14 01:00:00	2.1	8.3	1.4	273630
76	1995-01-04 03:00:00	1995-01-04 14:30:01	1995-01-05 05:00:00	8.19958	42.2	78.2	1995-01-04 08:00:00	1995-01-04 18:15:00	1995-01-06 03:00:00	2.275	152	11	6.44375e+06
77	1995-01-05 12:00:00	1995-01-05 12:30:00	1995-01-05 14:00:00	0.2	0.4	120.4	1995-01-05 12:15:00	1995-01-05 12:15:00	1995-01-06 03:00:00	26	26	11	0
78	1995-01-07 02:12:00	1995-01-07 03:29:59	1995-01-11 13:00:00	28.9981	257.8	120.8	1995-01-07 07:00:00	1995-01-10 12:00:00	1995-01-12 06:00:00	6.375	1730	148.75	7.2073e+07
79	1995-01-20 19:00:00	1995-01-20 23:29:58	1995-01-21 04:00:00	1.19986	4.7	17.5	1995-01-20 19:15:00	1995-01-21 04:00:00	1995-01-21 06:00:00	16	17	16	1800
80	1995-01-22 16:00:00	1995-01-23 23:30:00	1995-01-25 21:00:00	4.29985	117.9	16.9	1995-01-22 20:00:00	1995-01-24 21:15:00	1995-01-25 22:00:00	13.25	394	204.25	1.71246e+07
81	1995-02-12 04:02:13	1995-02-12 05:29:55	1995-02-13 01:00:00	2.79988	27.2	3.8	1995-02-13 13:00:00	1995-02-14 01:00:00	1995-02-15 02:00:00	13.5	238	129.75	2.48233e+07
82	1995-02-13 13:15:00	1995-02-13 22:30:02	1995-02-14 16:00:00	14.4952	77.8	27.5	1995-02-13 14:00:00	1995-02-14 08:00:00	1995-02-15 02:00:00	15.75	892	129.75	2.48686e+07
83	1995-03-01 06:12:00	1995-03-01 06:47:54	1995-03-01 08:00:00	0.5	1	1	1995-03-01 06:27:00	1995-03-01 06:30:00	1995-03-01 11:00:00	23	23	22	6050
84	1995-03-02 03:01:18	1995-03-02 11:30:03	1995-03-03 16:00:00	6.29817	52.2	2	1995-03-02 13:00:00	1995-03-03 06:30:00	1995-03-04 10:00:00	23	95	33	3034950
85	1995-03-04 09:00:00	1995-03-04 23:29:58	1995-03-06 02:00:00	10.0969	105.6	53.2	1995-03-04 17:00:00	1995-03-05 19:30:00	1995-03-07 03:00:00	30.75	551	117.75	23955300
86	1995-03-09 20:04:00	1995-03-10 00:29:58	1995-03-10 03:00:00	11.9975	27.8	105.6	1995-03-10 01:00:00	1995-03-11 02:00:00	1995-03-11 14:00:00	76.75	439	269.75	9.08593e+06
87	1995-03-10 11:00:00	1995-03-10 20:29:58	1995-03-11 23:00:00	29.1986	146.7	27.8	1995-03-10 11:00:00	1995-03-11 07:15:00	1995-03-12 06:00:00	69	613	232	1.84903e+07
88	1995-03-22 19:30:00	1995-03-23 03:29:59	1995-03-23 10:00:00	11.7	42.8	38.7	1995-03-22 21:00:00	1995-03-23 08:45:00	1995-03-23 16:00:00	65.75	192	110.75	2.07298e+06
89	1995-04-15 23:00:00	1995-04-16 02:30:03	1995-04-16 17:00:00	10.9976	37.3	0	1995-04-16 05:00:00	1995-04-16 17:44:00	1995-04-17 09:00:00	25.25	54	30	1.15451e+06
90	1995-06-14 05:00:00	1995-06-15 00:57:43	1995-06-15 04:00:00	0.1	2.4	0	1995-06-14 06:00:00	1995-06-15 20:45:00	1995-06-16 11:00:00	8.6	26	12.75	350669
91	1995-06-15 15:00:00	1995-06-15 17:30:02	1995-06-15 22:00:00	18.4974	48.6	2.4	1995-06-15 15:00:00	1995-06-16 17:15:00	1995-06-17 11:00:00	9.775	30	14	1.16585e+06
92	1995-10-31 06:00:00	1995-10-31 06:30:00	1995-10-31 09:00:00	0.1	0.4	0	1995-10-31 20:00:00	1995-11-01 04:45:00	1995-11-04 07:00:00	2.3	2.4	2.3	53730
93	1995-10-31 21:00:00	1995-11-01 00:28:39	1995-11-01 04:00:00	0.2	1.1	0.4	1995-10-31 21:15:00	1995-11-01 11:00:00	1995-11-02 15:00:00	2.3	2.6	2.4	24714.4
94	1995-12-12 13:00:00	1995-12-12 15:29:56	1995-12-13 23:00:00	3.89713	25	0.2	1995-12-12 21:00:00	1995-12-13 10:00:00	1995-12-14	2	3.7	2.9	51892.5
95	1995-12-22 20:00:00	1995-12-23 00:29:58	1995-12-23 16:00:00	3.89959	23.1	0	1995-12-23 05:00:00	1995-12-24 06:00:00	1995-12-24 15:00:00	2.55	4.1	3.7	52762.5
96	1996-01-24 05:00:00	1996-01-25 00:57:43	1996-01-25 10:00:00	0.1	2.7	22.7	1996-01-24 05:15:00	1996-01-24 05:15:00	1996-01-25 11:00:00	2.3	2.3	2.1	1778.82
97	1996-01-27 18:00:00	1996-01-27 22:50:25	1996-01-28 04:00:00	0.2	2	2.9	1996-01-28 02:00:00	1996-01-28 02:15:00	1996-01-28 18:00:00	2.25	2.3	2.1	6560.16
98	1996-01-30 21:00:00	1996-01-31 03:29:55	1996-02-01 12:00:00	15.0984	97.5	2	1996-01-31 05:00:00	1996-01-31 18:30:00	1996-02-02 01:00:00	2.25	93	8.3	3.28384e+06
99	1996-02-18 04:12:00	1996-02-20 00:29:56	1996-02-21 21:00:00	15.6948	245.6	0	1996-02-19 06:00:00	1996-02-21 06:45:00	1996-02-23 23:00:00	2.9	584	36	7.09551e+07
100	1996-03-04 01:01:16	1996-03-04 03:30:00	1996-03-05 04:00:00	4.79972	38.4	11.1	1996-03-04 14:00:00	1996-03-05 01:15:00	1996-03-05 21:00:00	9.45	77	28	2.63903e+06
101	1996-03-11 04:03:31	1996-03-11 06:30:02	1996-03-11 10:00:00	3.49992	15.5	0	1996-03-11 04:18:31	1996-03-11 04:30:00	1996-03-11 18:00:00	10	10	9.9	2210
102	1996-03-11 19:05:00	1996-03-12 14:30:03	1996-03-14 02:00:00	9.4935	75.6	15.5	1996-03-12 13:00:00	1996-03-13 00:15:00	1996-03-14 21:00:00	11	274	61	1.12038e+07
103	1996-04-16 15:30:00	1996-04-17 02:30:03	1996-04-17 04:00:00	1.39884	4.2	9.2	1996-04-16 17:00:00	1996-04-17 08:15:00	1996-04-19 05:00:00	7.05	11	8	432791
104	1996-04-17 17:10:00	1996-04-18 01:29:56	1996-04-18 04:00:00	1.19989	6.1	13.4	1996-04-18	1996-04-18 04:00:00	1996-04-18 19:00:00	9.45	11	8.6	85587.6
105	1996-11-21 00:15:00	1996-11-21 03:29:55	1996-11-22 05:00:00	20.5934	76.3	0	1996-11-21 03:00:00	1996-11-22 07:00:00	1996-11-22 23:00:00	1.3	48	12	1.76361e+06
106	1996-12-08 04:08:34	1996-12-09 02:31:47	1996-12-09 04:00:00	0.7	16.8	4	1996-12-09 13:00:00	1996-12-10 03:45:00	1996-12-10 10:00:00	1.775	36	24.5	573304
107	1996-12-09 10:08:34	1996-12-09 17:29:59	1996-12-12 04:00:00	12.0992	126.4	20.8	1996-12-09 13:00:00	1996-12-11 04:30:00	1996-12-13	1.775	117	16	1.03085e+07
108	1996-12-20 05:00:00	1996-12-22 02:29:59	1996-12-22 15:00:00	4.29995	60.8	0	1996-12-22 05:00:00	1996-12-22 12:45:00	1996-12-24	3.35	569	20	1.19516e+07
109	1997-01-11 22:20:00	1997-01-12 03:29:57	1997-01-13 12:00:00	3.79965	34.4	0	1997-01-12 09:00:00	1997-01-13 04:15:00	1997-01-13 16:00:00	4.8	28	16	757838
110	1997-01-13 18:00:00	1997-01-14 04:29:59	1997-01-14 06:00:00	1.19996	5.1	34.4	1997-01-13 18:15:00	1997-01-13 18:15:00	1997-01-14 07:00:00	16	15	13	0
111	1997-01-14 12:12:00	1997-01-15 03:29:58	1997-01-15 20:00:00	4.1985	28.5	39.5	1997-01-15 08:00:00	1997-01-15 17:00:00	1997-01-16 22:00:00	11.75	89	25	3.46994e+06
112	1997-01-20 01:05:00	1997-01-20 02:30:00	1997-01-20 14:00:00	3.19964	10.9	30.8	1997-01-20 12:00:00	1997-01-20 15:30:00	1997-01-20 17:00:00	12.75	28	23	57330
113	1997-01-24 04:04:36	1997-01-24 05:29:54	1997-01-24 09:00:00	1.6992	4.4	38.6	1997-01-24 04:19:36	1997-01-24 04:30:00	1997-01-24 11:00:00	33	32	28	1903.85
114	1997-01-24 22:12:00	1997-01-25 18:29:58	1997-01-26 23:00:00	3.79928	55.4	43	1997-01-25 08:00:00	1997-01-26 02:30:00	1997-01-28 05:00:00	23.25	110	53	7.18249e+06
115	1997-11-25 04:06:39	1997-11-26 08:29:59	1997-11-27	6.9989	44.7	0	1997-11-26 09:00:00	1997-11-26 12:15:00	1997-11-28 03:00:00	1.95	34	3.7	1102230
116	1997-12-04 04:20:00	1997-12-06 03:29:59	1997-12-06 22:00:00	7.39975	74	14.2	1997-12-05 16:00:00	1997-12-06 08:00:00	1997-12-07 04:00:00	2.2	147	12	4.51536e+06
117	1998-01-09 00:01:15	1998-01-09 01:29:58	1998-01-09 03:00:00	9.49745	15.8	3.5	1998-01-09 09:00:00	1998-01-10 02:00:00	1998-01-11 05:00:00	2.9	37	12	2.3875e+06
118	1998-01-09 08:00:00	1998-01-09 16:29:57	1998-01-10 10:00:00	4.59774	37.6	19.3	1998-01-09 09:00:00	1998-01-10 07:45:00	1998-01-11 05:00:00	2.9	62	12	2.3875e+06
119	1998-01-30 05:00:00	1998-01-31 00:57:43	1998-01-31 04:00:00	0.1	2.4	19.8	1998-01-30 05:15:00	1998-01-30 05:15:00	1998-01-31 05:00:00	5.6	5.4	4.1	0
120	1998-01-31 10:00:00	1998-01-31 14:29:58	1998-01-31 15:00:00	0.399965	1.3	22.2	1998-01-31 10:15:00	1998-01-31 10:15:00	1998-01-31 17:00:00	4.1	4.1	4.05	474.107
121	1998-02-04 05:00:00	1998-02-04 14:29:58	1998-02-05 04:00:00	0.699778	3.6	107.9	1998-02-04 05:15:00	1998-02-04 05:15:00	1998-02-05 05:00:00	56	55	21	243.75
122	1998-02-07 14:00:00	1998-02-07 18:29:58	1998-02-08 03:00:00	21.6996	77.8	204.2	1998-02-07 17:00:00	1998-02-07 22:30:00	1998-02-08 17:00:00	53	924	118.4	20411370
123	1998-02-19 06:30:00	1998-02-19 21:30:02	1998-02-20 03:00:00	4.29876	20.4	37.8	1998-02-19 17:00:00	1998-02-19 23:45:00	1998-02-20 09:00:00	25	53	33	579406
124	1998-02-21 21:00:00	1998-02-22 03:29:55	1998-02-24 14:00:00	16.4922	216.9	45.3	1998-02-21 23:00:00	1998-02-23 14:20:00	1998-02-26 04:00:00	25	4380	153	2.31641e+08
125	1998-03-26 04:15:00	1998-03-26 05:29:59	1998-03-26 07:00:00	1.19986	1.9	82.5	1998-03-26 04:30:00	1998-03-26 04:30:00	1998-03-27	46	46	31	900
126	1998-03-27	1998-03-28 01:29:59	1998-03-28 20:00:00	5.39951	28.8	84.4	1998-03-27 06:00:00	1998-03-28 06:00:00	1998-03-29 01:00:00	30.5	89	46.5	1.77343e+06
127	1998-03-29 09:20:00	1998-03-29 11:29:59	1998-03-29 15:00:00	0.699999	2.4	113.2	1998-03-29 09:35:00	1998-03-29 09:45:00	1998-03-29 16:00:00	43	43	40.25	1692
128	1998-03-31 09:20:00	1998-03-31 17:30:01	1998-04-01	7.99936	25.3	42.7	1998-03-31 10:00:00	1998-03-31 20:30:00	1998-04-01 10:00:00	33.5	126	57.75	2.04822e+06
129	1998-04-09 07:30:00	1998-04-09 08:00:00	1998-04-09 09:00:00	0.2	0.4	9.3	1998-04-09 07:45:00	1998-04-09 08:00:00	1998-04-09 17:00:00	47	47	44	13475.7
130	1998-04-10 05:01:34	1998-04-10 05:31:34	1998-04-10 07:00:00	3.70522	4	6.8	1998-04-10 05:16:34	1998-04-10 05:45:00	1998-04-10 13:00:00	44	45	43	21210
131	1998-05-01 14:00:00	1998-05-01 16:35:27	1998-05-01 18:00:00	1.07266	2	0	1998-05-02 02:00:00	1998-05-02 13:00:00	1998-05-02 18:00:00	21.75	29	21	98669.5
132	1998-05-02 05:30:00	1998-05-03 21:29:55	1998-05-04 04:00:00	3.69864	29.7	2	1998-05-02 07:00:00	1998-05-05 03:45:00	1998-05-07 09:00:00	22.5	231	69.25	2.27101e+07
133	1998-05-04 12:30:00	1998-05-04 22:30:02	1998-05-06 05:00:00	11.6986	79	31.7	1998-05-04 17:00:00	1998-05-05 13:45:00	1998-05-07 09:00:00	25.5	484	69.25	2.46277e+07
134	1998-05-12 09:00:00	1998-05-12 12:29:57	1998-05-13 23:00:00	10.1978	87.6	25.4	1998-05-12 11:00:00	1998-05-12 17:30:00	1998-05-16 06:00:00	35.75	384	119.8	4.28256e+07
135	1998-08-31 19:15:00	1998-08-31 19:45:00	1998-09-01 04:00:00	0.35	2.7	0	1998-08-31 23:00:00	1998-09-01 06:00:00	1998-09-01 18:00:00	2.925	3.9	2.6	45967.8
136	1998-09-02 13:00:00	1998-09-02 13:30:00	1998-09-02 15:00:00	1.4	1.6	2.7	1998-09-02 18:00:00	1998-09-02 22:15:00	1998-09-03 18:00:00	3.3	4.3	3	65083.9
137	1998-09-04 12:00:00	1998-09-04 12:30:00	1998-09-04 15:00:00	0.1	0.4	7.1	1998-09-04 14:00:00	1998-09-05 02:45:00	1998-09-06 18:00:00	4.7	5.6	4.1	172095
138	1998-11-07 23:30:00	1998-11-08 02:29:53	1998-11-08 13:00:00	3.8949	11.9	0	1998-11-08 03:00:00	1998-11-08 07:00:00	1998-11-08 16:00:00	3.6	5.1	4.6	29581.1
139	1998-12-01 14:15:00	1998-12-01 14:45:00	1998-12-01 18:00:00	0.35	1	28.1	1998-12-01 15:00:00	1998-12-02 03:45:00	1998-12-02 06:00:00	3.9	4.1	3.9	540
140	1998-12-03 15:00:00	1998-12-03 18:29:57	1998-12-03 21:00:00	0.399864	1.4	29.1	1998-12-03 21:00:00	1998-12-04 11:45:00	1998-12-04 15:00:00	4.45	4.7	4.5	2112.84
141	1999-01-22 05:00:00	1999-01-23 00:57:43	1999-01-23 04:00:00	0.1	2.4	8.4	1999-01-22 05:15:00	1999-01-22 05:30:00	1999-01-23 05:00:00	3.1	3.1	2.8	599.062
142	1999-01-26 04:30:00	1999-01-26 08:30:01	1999-01-28 06:00:00	3.8998	31.2	36.4	1999-01-26 06:00:00	1999-01-26 13:15:00	1999-01-28 07:00:00	5.75	16	6.3	777918
143	1999-01-28 11:00:00	1999-01-28 11:30:00	1999-01-28 14:00:00	0.1	0.4	64.8	1999-01-28 11:15:00	1999-01-28 11:15:00	1999-01-28 15:00:00	6.3	6.1	5.8	922.5
144	1999-01-28 19:00:00	1999-01-28 19:30:00	1999-01-29 04:00:00	0.1	0.7	65.2	1999-01-28 19:15:00	1999-01-28 19:15:00	1999-01-29 05:00:00	5.8	5.8	5.3	456.923
145	1999-02-04 08:00:00	1999-02-05 06:59:59	1999-02-05 15:00:00	0.5	6.1	12.1	1999-02-04 23:00:00	1999-02-05 01:15:00	1999-02-05 16:00:00	4.8	5.3	5.1	9540
146	1999-03-09 06:30:00	1999-03-09 08:29:58	1999-03-09 10:00:00	0.599932	1.3	5.7	1999-03-09 06:45:00	1999-03-09 09:45:00	1999-03-10 15:00:00	3.2	3.4	3.2	20520
147	1999-03-11 07:30:00	1999-03-11 08:29:57	1999-03-11 11:00:00	0.299933	0.8	1.3	1999-03-11 07:45:00	1999-03-11 09:15:00	1999-03-11 19:00:00	3.2	3.4	3.3	4080
148	1999-03-13 20:01:25	1999-03-13 20:31:25	1999-03-13 22:00:00	4.2977	8.4	2.1	1999-03-13 20:16:25	1999-03-13 20:30:00	1999-03-14 14:00:00	3	3	2.8	5515.71
149	1999-04-03 07:00:00	1999-04-03 16:29:58	1999-04-03 21:00:00	1.09967	2.2	4.4	1999-04-03 07:15:00	1999-04-03 07:15:00	1999-04-03 22:00:00	3.6	3.6	3.4	693
150	1999-04-05 05:00:00	1999-04-06 10:29:58	1999-04-07 16:00:00	2.49978	39.8	6.6	1999-04-05 20:00:00	1999-04-06 20:45:00	1999-04-10	2.9	20	6.9	1.66749e+06
151	1999-04-08	1999-04-08 06:58:46	1999-04-08 09:00:00	0.2	0.9	44.1	1999-04-08 00:15:00	1999-04-08 00:15:00	1999-04-08 10:00:00	12	12	9.1	2702.31
152	1999-04-08 16:00:00	1999-04-08 18:30:02	1999-04-08 21:00:00	3.29868	6.8	42.9	1999-04-08 20:00:00	1999-04-09 05:00:00	1999-04-09 20:00:00	8.25	9.5	7.2	75783.7
153	1999-04-11 07:00:00	1999-04-12 12:36:41	1999-04-12 16:00:00	3.7	35.8	7.7	1999-04-11 08:00:00	1999-04-12 05:15:00	1999-04-15 01:00:00	5.95	13	7.5	925009
154	1999-04-13 05:00:00	1999-04-14 00:57:43	1999-04-14 04:00:00	0.1	2.4	43.5	1999-04-13 05:15:00	1999-04-13 05:15:00	1999-04-14 06:00:00	12	12	9.1	391.5
155	2000-02-10 04:30:00	2000-02-10 16:29:58	2000-02-11	8.6978	35.1	0	2000-02-10 13:00:00	2000-02-10 17:45:00	2000-02-12	1.8	24	4.5	803077
156	2000-02-11 21:00:00	2000-02-12 02:29:59	2000-02-12 10:00:00	11.9929	35.7	35.1	2000-02-12 01:00:00	2000-02-12 06:00:00	2000-02-13 06:00:00	4.85	42	7.2	1.08081e+06
157	2000-02-12 17:30:00	2000-02-13 03:29:56	2000-02-15 03:00:00	1.69902	26.2	70.8	2000-02-12 17:45:00	2000-02-12 17:45:00	2000-02-15 06:00:00	14	14	6.3	797.676
158	2000-02-17 05:00:00	2000-02-18 00:57:43	2000-02-18 04:00:00	0.1	2.4	103.1	2000-02-17 05:15:00	2000-02-17 05:15:00	2000-02-18 13:00:00	24	23	7.8	0
159	2000-03-03 05:00:00	2000-03-03 22:30:02	2000-03-04	1.39946	7.4	16.1	2000-03-03 20:00:00	2000-03-03 22:15:00	2000-03-04 05:00:00	8.6	12	11	48420
160	2000-03-04 17:00:00	2000-03-05 17:29:58	2000-03-06 09:00:00	9.59723	76.2	7.4	2000-03-04 23:00:00	2000-03-05 14:00:00	2000-03-06 19:00:00	9.3	227	30	5.85669e+06
161	2000-03-07 21:00:00	2000-03-08 04:30:02	2000-03-08 12:00:00	3.9984	25.5	83.6	2000-03-08 03:00:00	2000-03-08 12:00:00	2000-03-09 10:00:00	22	45	28	1.08296e+06
162	2000-04-14 10:20:00	2000-04-14 13:29:55	2000-04-14 14:00:00	2.19906	4.5	0.1	2000-04-14 14:00:00	2000-04-15 01:45:00	2000-04-16 03:00:00	3.25	5.6	3.7	123595
163	2000-04-17 02:00:00	2000-04-17 11:30:04	2000-04-18 13:00:00	13.4966	101.3	5.1	2000-04-17 12:00:00	2000-04-17 19:15:00	2000-04-19 17:00:00	4.2	124	15	6.90458e+06
164	2001-01-05 16:00:00	2001-01-05 20:29:58	2001-01-05 21:00:00	0.699825	1.5	0	2001-01-05 16:15:00	2001-01-05 22:45:00	2001-01-06 15:00:00	0.77	0.86	0.815	3607.39
165	2001-01-08 05:00:00	2001-01-08 12:29:56	2001-01-08 17:00:00	1.09938	3.4	1.5	2001-01-08 05:15:00	2001-01-08 17:15:00	2001-01-09	0.86	0.97	0.86	2277
166	2001-01-10 15:00:00	2001-01-11 07:29:54	2001-01-12 18:00:00	15.1805	128.8	5.9	2001-01-10 15:00:00	2001-01-11 07:30:00	2001-01-13 07:00:00	0.975	100	5.8	4.0976e+06
167	2001-02-07 11:30:00	2001-02-07 14:29:59	2001-02-07 17:00:00	0.799999	3.1	0	2001-02-07 11:45:00	2001-02-07 14:00:00	2001-02-07 18:00:00	1.6	1.7	1.6	450
168	2001-02-10 02:30:00	2001-02-10 16:30:01	2001-02-11 08:00:00	2.89922	11.8	3.1	2001-02-10 07:00:00	2001-02-12 07:25:00	2001-02-12 12:00:00	1.875	172	72.75	845365
169	2001-02-11 13:15:00	2001-02-12 23:31:32	2001-02-15 04:00:00	18	174.5	14.9	2001-02-11 16:00:00	2001-02-13 04:45:00	2001-02-15 06:00:00	2.125	348	22	1.97786e+07
170	2001-02-20 05:30:00	2001-02-20 06:00:00	2001-02-20 18:00:00	0.1125	0.7	15.8	2001-02-20 05:45:00	2001-02-20 05:45:00	2001-02-20 21:00:00	21	21	14	1504.92
171	2001-02-23 05:12:00	2001-02-23 06:29:59	2001-02-23 14:00:00	1.49993	4.7	16.5	2001-02-23 08:00:00	2001-02-23 08:30:00	2001-02-23 15:00:00	11.5	12	11	15155.4
172	2001-02-24 08:00:00	2001-02-27 03:30:01	2001-02-28 23:00:00	4.79856	119.4	5.4	2001-02-24 09:00:00	2001-02-26 04:30:00	2001-03-01 02:00:00	9.8	76	25	5.59927e+06
173	2001-03-04 04:06:39	2001-03-05 00:30:01	2001-03-07 08:00:00	3.99963	75.1	0	2001-03-04 14:00:00	2001-03-06 07:00:00	2001-03-08 02:00:00	15.25	251	41	9.04383e+06
174	2001-04-04 05:00:00	2001-04-05 00:57:43	2001-04-05 04:00:00	0.1	2.4	0	2001-04-04 05:15:00	2001-04-04 05:15:00	2001-04-05 05:00:00	6.3	6.6	6.3	6345
175	2001-04-06 23:00:00	2001-04-07 06:29:26	2001-04-07 21:00:00	9.2	43.4	2.4	2001-04-07 01:00:00	2001-04-07 12:00:00	2001-04-08 10:00:00	5.95	30	11	893974
176	2001-10-30 12:00:00	2001-10-30 14:30:02	2001-10-30 17:00:00	0.999801	3.4	0.2	2001-10-30 12:15:00	2001-10-30 14:15:00	2001-11-01 14:00:00	0.16	0.24	0.17	9062.89
177	2001-11-11 05:30:00	2001-11-11 08:10:09	2001-11-11 11:00:00	0.4	1.6	0	2001-11-11 05:45:00	2001-11-11 10:45:00	2001-11-12 10:00:00	0.24	0.36	0.22	11448
178	2001-11-12 15:00:00	2001-11-12 18:29:57	2001-11-12 20:00:00	7.99827	14.9	1.6	2001-11-12 18:00:00	2001-11-12 19:15:00	2001-11-13 09:00:00	1.01	1.5	0.59	16078.5
179	2001-11-13 04:30:00	2001-11-14 00:52:04	2001-11-14 04:00:00	0.2	4.8	16.5	2001-11-13 04:45:00	2001-11-13 04:45:00	2001-11-14 05:00:00	0.86	0.77	0.42	0
180	2001-12-20 18:00:00	2001-12-20 23:29:59	2001-12-21 17:00:00	3.49995	19.6	0.5	2001-12-20 21:00:00	2001-12-21 02:30:00	2001-12-21 19:00:00	1.475	2.6	1.9	38082.5
181	2001-12-21 23:00:00	2001-12-22 02:29:57	2001-12-22 04:00:00	0.199932	0.7	20.1	2001-12-22 14:00:00	2001-12-22 18:15:00	2001-12-23 02:00:00	1.725	2	1.9	5376.09
182	2002-01-27 11:15:00	2002-01-27 15:29:56	2002-01-28 12:00:00	14.2949	59.8	0	2002-01-27 16:00:00	2002-01-28 02:15:00	2002-01-29 14:00:00	0.7725	41	4.7	1.5835e+06
183	2002-11-07 14:00:00	2002-11-09 12:30:00	2002-11-09 23:00:00	9.1989	128.6	0	2002-11-08 01:00:00	2002-11-09 19:15:00	2002-11-10	0.4675	23	10.35	77622.2
184	2002-12-15 01:00:00	2002-12-15 02:30:01	2002-12-15 07:00:00	0.199967	0.8	0	2002-12-15 01:15:00	2002-12-15 13:30:00	2002-12-15 14:00:00	0.69	0.77	0.69	72
185	2002-12-16 04:00:00	2002-12-16 13:29:58	2002-12-16 23:00:00	11.7997	45.1	0.8	2002-12-16 13:00:00	2002-12-16 20:10:00	2002-12-17 02:00:00	0.975	25	6.825	257663
186	2002-12-17 10:00:00	2002-12-17 13:29:57	2002-12-17 15:00:00	0.399864	1.2	45.9	2002-12-17 10:15:00	2002-12-17 10:15:00	2002-12-18 10:00:00	6.9	6.6	3.1	18
187	2002-12-19 21:30:00	2002-12-20 02:29:56	2002-12-20 10:00:00	9.39519	36	47.1	2002-12-20	2002-12-20 15:30:00	2002-12-20 20:00:00	2.275	16	12	215740
188	2003-02-11 01:00:00	2003-02-11 05:29:58	2003-02-11 15:00:00	10.2997	48.6	0	2003-02-11 05:00:00	2003-02-12 15:00:00	2003-02-13 16:00:00	1.1	320	33	1.22121e+07
189	2003-02-11 21:00:00	2003-02-12 11:29:58	2003-02-13 04:00:00	20.8995	180.1	48.6	2003-02-11 23:00:00	2003-02-12 16:40:00	2003-02-13 16:00:00	2.225	433	33	1.2559e+07
190	2003-02-24 13:00:00	2003-02-24 23:29:59	2003-02-25 18:00:00	9.5	37.6	0.4	2003-02-24 22:00:00	2003-02-25 10:00:00	2003-02-26 07:00:00	3.4	15	7.5	499719
191	2003-03-15 04:06:39	2003-03-15 09:29:56	2003-03-17 01:00:00	17.1959	153.8	0	2003-03-15 05:00:00	2003-03-16 00:05:00	2003-03-17 06:00:00	2.7	217	25	8.26658e+06
192	2003-04-13	2003-04-14 15:29:58	2003-04-15 01:00:00	7.59828	67.2	0	2003-04-13 12:00:00	2003-04-14 18:30:00	2003-04-15 20:00:00	2.95	78	16	3.49545e+06
193	2003-05-02 15:08:34	2003-05-03 07:29:57	2003-05-04 02:00:00	8.09773	61.1	0	2003-05-02 19:00:00	2003-05-03 14:30:00	2003-05-05 01:00:00	4.1	35	11	1639825
194	2003-12-07 08:00:00	2003-12-07 08:30:00	2003-12-07 21:00:00	0.1	1	1.1	2003-12-07 08:15:00	2003-12-07 08:15:00	2003-12-08 16:00:00	0.42	0.42	0.375	2571.75
195	2003-12-14 11:30:00	2003-12-14 12:29:57	2003-12-14 17:00:00	0.499799	1.6	0	2003-12-14 11:45:00	2003-12-14 15:00:00	2003-12-14 18:00:00	0.59	0.77	0.69	576
196	2003-12-23 10:00:00	2003-12-23 12:29:56	2003-12-23 13:00:00	0.199899	0.5	0	2003-12-23 10:15:00	2003-12-24 09:30:00	2003-12-24 10:00:00	0.69	0.77	0.71	108.568
197	2003-12-24 12:00:00	2003-12-25 14:30:00	2003-12-25 19:00:00	10.5996	36.3	0.5	2003-12-25 10:00:00	2003-12-25 18:25:00	2003-12-27 14:00:00	1.2	160	2.6	3.28097e+06
198	2004-02-02 17:06:39	2004-02-02 19:30:04	2004-02-02 23:00:00	12.5984	37.5	0	2004-02-02 18:00:00	2004-02-03 00:30:00	2004-02-03 09:00:00	1.0925	14	4.15	210961
199	2004-02-20 09:12:00	2004-02-20 12:30:02	2004-02-20 14:00:00	3.29876	6	22.6	2004-02-20 09:27:00	2004-02-20 13:30:00	2004-02-20 19:00:00	2.2	2.3	2.2	1890
200	2004-02-21 14:00:00	2004-02-21 23:30:04	2004-02-23 09:00:00	4.79954	59	28.6	2004-02-21 16:00:00	2004-02-22 13:45:00	2004-02-23 17:00:00	2.1	17	7.8	653667
201	2004-02-25 12:00:00	2004-02-26 00:30:02	2004-02-26 09:00:00	10.9998	83.1	65.2	2004-02-25 18:00:00	2004-02-26 05:15:00	2004-02-27 23:00:00	4.3	705	18	1.58987e+07
202	2004-10-16 22:00:00	2004-10-17 01:26:21	2004-10-17 23:00:00	3.7	26.5	0	2004-10-17 02:00:00	2004-10-17 08:45:00	2004-10-18	0.41	1.3	0.59	24319.8
203	2004-10-18 06:30:00	2004-10-18 11:30:02	2004-10-18 23:00:00	1.69967	14.4	26.5	2004-10-18 17:00:00	2004-10-19 23:00:00	2004-10-23 16:00:00	0.64	33	6.3	3.01629e+07
204	2004-10-19 09:00:00	2004-10-19 20:30:01	2004-10-20 23:00:00	19.1994	146.6	40.9	2004-10-19 20:00:00	2004-10-20 03:50:00	2004-10-22 05:00:00	0.7425	892	15	2.86338e+07
205	2004-10-26 15:00:00	2004-10-27 00:29:58	2004-10-27 05:00:00	8.0977	58.5	0.3	2004-10-26 18:00:00	2004-10-27 00:15:00	2004-10-27 21:00:00	3.575	286	64	7625500
206	2004-12-27 17:12:00	2004-12-28 06:29:55	2004-12-29 23:00:00	18.3992	255.1	1	2004-12-27 18:00:00	2004-12-29 00:45:00	2004-12-30 02:00:00	2.175	802	201.75	40197753
207	2005-01-04 11:00:00	2005-01-04 13:30:02	2005-01-04 16:00:00	0.299934	0.9	64.1	2005-01-04 11:00:00	2005-01-04 11:15:00	2005-01-04 22:00:00	83.25	87	76.5	59471.6
208	2005-01-07 04:01:12	2005-01-09 14:29:56	2005-01-11 05:00:00	10.9994	354.2	36.5	2005-01-07 07:00:00	2005-01-09 17:05:00	2005-01-14 05:00:00	52	3540	246.75	4.34529e+08
209	2005-02-17 13:08:34	2005-02-23 01:30:03	2005-02-23 07:00:00	10.4898	309	1.5	2005-02-17 15:00:00	2005-02-21 02:45:00	2005-02-23 12:00:00	32.25	1510	593.5	1.27358e+08
210	2005-04-24 02:00:00	2005-04-24 02:30:00	2005-04-24 04:00:00	0.1	0.3	1.2	2005-04-24 02:15:00	2005-04-24 09:00:00	2005-04-24 13:00:00	19	20	19	8100
211	2005-04-27 23:30:00	2005-04-28 03:29:55	2005-04-29	5.89561	25	1.5	2005-04-28 02:00:00	2005-04-28 08:50:00	2005-04-29 02:00:00	18.5	61	21	500873
212	2005-10-15 17:10:00	2005-10-15 18:29:59	2005-10-16 01:00:00	2.39999	7.9	0	2005-10-15 23:00:00	2005-10-16 04:15:00	2005-10-16 20:00:00	2.375	2.7	2.4	13443.8
213	2005-10-16 23:00:00	2005-10-17 12:29:57	2005-10-17 17:00:00	14.2952	53.6	8.1	2005-10-17	2005-10-17 17:30:00	2005-10-19	2.5	32	6.9	1.08463e+06
214	2005-11-09 07:00:00	2005-11-10 02:46:00	2005-11-10 04:00:00	0.2	2.3	0	2005-11-09 15:00:00	2005-11-10 11:15:00	2005-11-12 01:00:00	3.3	3.6	3.4	39973.6
215	2005-12-31 10:00:00	2005-12-31 13:29:57	2006-01-01 02:00:00	14.6941	34.3	5.1	2005-12-31 13:00:00	2005-12-31 16:45:00	2006-01-01 15:00:00	3.175	27	7.2	689538
216	2006-01-01 10:30:00	2006-01-02 09:29:59	2006-01-02 22:00:00	20.1993	103.2	34.3	2006-01-01 16:00:00	2006-01-02 12:15:00	2006-01-04 04:00:00	7.35	1120	15	2.44135e+07
217	2006-02-27 11:15:00	2006-02-27 23:30:00	2006-02-28 10:00:00	13.0996	130.9	0	2006-02-27 15:00:00	2006-02-28 04:45:00	2006-03-01 10:00:00	2.975	463	23	1.43728e+07
218	2006-03-25 05:10:00	2006-03-25 05:40:00	2006-03-25 08:00:00	0.511111	0.8	25.8	2006-03-25 05:25:00	2006-03-25 05:30:00	2006-03-25 15:00:00	7.8	7.8	7.65	2433.55
219	2006-03-27 19:05:27	2006-03-28 16:30:03	2006-03-29 05:00:00	13.999	105.7	0.8	2006-03-28 02:00:00	2006-03-28 22:00:00	2006-03-30 11:00:00	7.8	195	30	7.03199e+06
220	2006-03-30 00:15:00	2006-03-30 03:29:55	2006-03-30 04:00:00	0.611772	1.5	106.5	2006-03-30 00:30:00	2006-03-30 00:30:00	2006-03-30 11:00:00	39	39	30	4371.43
221	2006-03-31 06:30:00	2006-03-31 08:07:26	2006-03-31 10:00:00	0.4	1.2	107.2	2006-04-01 02:00:00	2006-04-01 08:15:00	2006-04-02 03:00:00	20.5	30	22	417388
222	2006-03-31 22:00:00	2006-04-01 06:30:03	2006-04-01 15:00:00	2.69931	18.4	108.4	2006-04-01 02:00:00	2006-04-01 11:00:00	2006-04-01 23:00:00	20.5	31	23	356652
223	2006-04-02 00:30:00	2006-04-02 03:09:09	2006-04-02 04:00:00	0.3	0.8	126.8	2006-04-02 00:45:00	2006-04-02 00:45:00	2006-04-02 08:00:00	23	23	21	6008.28
224	2006-04-03 11:00:00	2006-04-03 13:28:50	2006-04-03 19:00:00	0.2	1.4	21.9	2006-04-04 09:00:00	2006-04-04 19:00:00	2006-04-07 19:00:00	17.5	131	41	1.7017e+07
225	2006-04-04	2006-04-04 17:30:02	2006-04-05 18:00:00	7.79938	77.2	23.3	2006-04-04 09:00:00	2006-04-04 21:00:00	2006-04-06 21:00:00	17.5	220	56	1.38073e+07
226	2006-04-14 08:20:00	2006-04-14 11:30:01	2006-04-15 04:00:00	6.79971	28	1.5	2006-04-14 14:00:00	2006-04-14 21:30:00	2006-04-15 18:00:00	19.25	36	23	693368
227	2006-12-16 05:00:00	2006-12-16 09:29:58	2006-12-16 22:00:00	2.29972	17.4	0	2006-12-16 10:00:00	2006-12-16 21:45:00	2006-12-17 12:00:00	1.5	1.9	1.7	16021.7
228	2007-01-27 11:00:00	2007-01-27 14:29:57	2007-01-28 06:00:00	1.49973	9.1	0	2007-01-27 22:00:00	2007-01-28 15:30:00	2007-01-28 17:00:00	1.6	2.2	1.6	6750
229	2007-01-30 11:03:19	2007-01-30 12:29:55	2007-01-31 06:00:00	3.69839	10.1	9.1	2007-01-30 12:00:00	2007-01-30 17:00:00	2007-01-31 07:00:00	1.625	2.4	2	19433.2
230	2007-02-11 02:00:00	2007-02-11 05:29:57	2007-02-11 10:00:00	7.09615	12.9	0.9	2007-02-11 05:00:00	2007-02-11 13:15:00	2007-02-12 01:00:00	1.725	3.4	2.3	56505.7
231	2007-02-22 06:00:00	2007-02-22 16:29:59	2007-02-22 22:00:00	2.39995	13	12	2007-02-22 20:00:00	2007-02-23 03:45:00	2007-02-23 06:00:00	2.075	2.6	2.4	1905.75
232	2007-02-26 19:00:00	2007-02-27 03:29:57	2007-02-27 08:00:00	6.09962	23.3	13	2007-02-27 02:00:00	2007-02-27 15:45:00	2007-02-28 16:00:00	2.25	12	4.3	464345
233	2007-03-20 05:00:00	2007-03-20 19:30:04	2007-03-21 09:00:00	1.39935	10.3	0	2007-03-20 05:15:00	2007-03-21 09:45:00	2007-03-22 04:00:00	1.4	1.7	1.6	12928.2
234	2007-04-15 04:10:00	2007-04-15 04:40:00	2007-04-15 06:00:00	0.516667	0.7	0	2007-04-15 04:25:00	2007-04-15 04:30:00	2007-04-15 12:00:00	0.77	0.86	0.77	2308.5
235	2007-04-20 04:05:00	2007-04-20 10:30:00	2007-04-20 15:00:00	11.0995	34.4	0.7	2007-04-20 08:00:00	2007-04-20 20:00:00	2007-04-24 16:00:00	1.035	3.4	1.6	390576
236	2007-12-17 18:30:00	2007-12-18 21:29:58	2007-12-19 08:00:00	5.79941	38.4	0	2007-12-18 06:00:00	2007-12-19 05:45:00	2007-12-19 12:00:00	0.73	15	8.785	182358
237	2008-01-04 05:00:00	2008-01-05 00:29:58	2008-01-05 04:00:00	11.7972	72.8	0	2008-01-04 18:00:00	2008-01-05 01:45:00	2008-01-05 20:00:00	1.6425	769	31.725	1.57859e+07
238	2008-01-22 01:00:00	2008-01-22 01:30:00	2008-01-22 08:00:00	0.1	0.5	0	2008-01-22 01:00:00	2008-01-22 05:15:00	2008-01-22 09:00:00	3.56	3.73	3.56	1224
239	2008-01-22 15:00:00	2008-01-22 16:30:13	2008-01-23 04:00:00	0.5	3	0.5	2008-01-23 16:00:00	2008-01-23 23:15:00	2008-01-24 12:00:00	3.325	21.3	9.89	426690
240	2008-01-26 18:10:00	2008-01-27 01:30:01	2008-01-28 09:00:00	9.99761	123.4	150.8	2008-01-26 19:00:00	2008-01-28 06:00:00	2008-01-31 04:00:00	34.45	892	43.2	7.23975e+07
241	2008-10-04 15:00:00	2008-10-04 15:30:00	2008-10-04 20:00:00	0.1	0.5	0	2008-10-04 15:15:00	2008-10-04 19:15:00	2008-10-05 01:00:00	0.2	0.24	0.2	828
242	2008-11-01 08:01:45	2008-11-01 14:29:57	2008-11-01 17:00:00	3.89798	8.7	0	2008-11-01 08:16:45	2008-11-02 05:15:00	2008-11-02 09:00:00	0.1	0.24	0.2	2604.71
243	2008-11-04 03:00:00	2008-11-04 03:30:00	2008-11-04 09:00:00	0.1	0.7	8.7	2008-11-04 03:15:00	2008-11-04 10:00:00	2008-11-04 11:00:00	0.16	0.24	0.2	479.613
244	2008-11-25 20:02:36	2008-11-25 23:30:03	2008-11-26 04:00:00	8.19921	32.6	0	2008-11-25 22:00:00	2008-11-26 21:00:00	2008-11-27 08:00:00	0.705	10.3	1.26	210448
245	2008-12-22 07:00:00	2008-12-22 07:30:00	2008-12-22 15:00:00	0.2	1	5	2008-12-22 07:15:00	2008-12-22 12:15:00	2008-12-22 23:00:00	2.1	2.32	2.2	6848.57
246	2008-12-25 03:00:00	2008-12-25 11:30:03	2008-12-25 16:00:00	1.39981	7.6	1.2	2008-12-25 08:00:00	2008-12-26 02:15:00	2008-12-27 08:00:00	2.4025	9.51	4.47	413011
247	2009-02-08 07:00:00	2009-02-09 03:30:05	2009-02-09 16:00:00	1.8984	12.2	123.7	2009-02-09 02:00:00	2009-02-09 09:15:00	2009-02-11	20.3	43.2	17.4	1.32094e+06
248	2009-02-13 09:00:00	2009-02-13 14:29:59	2009-02-13 16:00:00	5.3	11.5	12.2	2009-02-13 13:00:00	2009-02-13 20:30:00	2009-02-14 16:00:00	10.5	19.3	11.1	339305
249	2009-02-16 04:01:13	2009-02-16 06:30:03	2009-02-16 21:00:00	10.7981	64.5	11.5	2009-02-16 05:00:00	2009-02-16 20:15:00	2009-02-17 06:00:00	9.9925	42.3	31.2	646974
250	2009-04-07 17:30:00	2009-04-07 18:29:57	2009-04-07 21:00:00	0.499799	1.1	0	2009-04-07 20:00:00	2009-04-08 17:30:00	2009-04-12 16:00:00	2.2	2.82	2.32	141094
251	2009-10-13 04:06:00	2009-10-13 12:30:02	2009-10-14 15:00:00	3.19962	59.3	0	2009-10-13 17:00:00	2009-10-14 10:15:00	2009-10-15 23:00:00	0.4825	13.7	2.1	657370
252	2009-12-07 04:04:00	2009-12-07 12:29:56	2009-12-07 18:00:00	7.09978	38	0	2009-12-07 05:00:00	2009-12-07 15:00:00	2009-12-08 07:00:00	2.0975	50	3.8225	1282428
253	2009-12-10 22:01:27	2009-12-10 23:29:58	2009-12-11 07:00:00	8.59752	20.6	38	2009-12-10 23:00:00	2009-12-11 02:30:00	2009-12-11 15:00:00	4.7375	28.4	7.4725	461357
254	2009-12-11 15:00:00	2009-12-12 18:30:02	2009-12-13 08:00:00	5.29984	56.2	58.6	2009-12-11 16:00:00	2009-12-13 02:20:00	2009-12-13 13:00:00	8.53	607	31.925	9.58932e+06
255	2010-01-17 13:20:00	2010-01-18 14:29:57	2010-01-18 17:00:00	12.5988	76	7.3	2010-01-17 15:00:00	2010-01-18 14:35:00	2010-01-18 22:00:00	3.175	4320	38.85	3.86888e+07
256	2010-01-19 10:10:00	2010-01-19 12:30:01	2010-01-19 16:00:00	10.6977	22.3	76	2010-01-19 11:00:00	2010-01-20 16:00:00	2010-01-20 19:00:00	40.825	274	63.275	3.10693e+06
257	2010-01-20 02:00:00	2010-01-20 15:29:57	2010-01-20 20:00:00	11.7969	42.2	98.3	2010-01-20 03:00:00	2010-01-21 15:30:00	2010-01-21 19:00:00	37.6	1370	95.3375	1.13641e+07
258	2010-02-05 11:30:00	2010-02-06 05:29:53	2010-02-06 21:00:00	18.5833	92.4	0	2010-02-05 14:00:00	2010-02-06 05:45:00	2010-02-06 22:00:00	5.2925	4620	32.675	3.42219e+07
259	2010-02-10 04:15:00	2010-02-10 06:29:54	2010-02-10 10:00:00	1.0996	2.6	111.9	2010-02-10 05:00:00	2010-02-10 22:15:00	2010-02-11 09:00:00	56.425	96.6	61.3	1.5524e+06
260	2010-02-21 08:00:00	2010-02-21 08:30:00	2010-02-21 10:00:00	0.1	0.3	7.1	2010-02-21 09:00:00	2010-02-21 10:00:00	2010-02-21 12:00:00	17.525	19.3	16.15	5758.13
261	2010-02-21 16:00:00	2010-02-21 18:30:02	2010-02-21 22:00:00	0.699934	2.6	7.4	2010-02-21 16:00:00	2010-02-21 23:15:00	2010-02-26 05:00:00	14.925	16	5.0825	47605
262	2010-02-27	2010-02-27 05:29:59	2010-02-27 18:00:00	16.893	60.9	4	2010-02-27 01:00:00	2010-02-27 07:15:00	2010-03-01 02:00:00	15.5	1480	34.325	1.14019e+07
263	2010-03-03 22:00:00	2010-03-03 23:30:01	2010-03-04 03:00:00	2.99944	5.8	60.9	2010-03-03 22:00:00	2010-03-04 01:15:00	2010-03-04 05:00:00	29.575	39.7	19.1	193865
264	2010-03-31 05:00:00	2010-03-31 05:30:00	2010-03-31 11:00:00	0.8	1.5	0	2010-03-31 06:00:00	2010-03-31 14:15:00	2010-03-31 16:00:00	34.55	54.2	41.45	86082.8
265	2010-04-04 23:05:27	2010-04-05 08:29:55	2010-04-05 12:00:00	5.9996	37.5	2.8	2010-04-05	2010-04-05 07:45:00	2010-04-05 15:00:00	41.225	492	40.025	4214808
266	2010-04-11 19:00:00	2010-04-11 23:29:58	2010-04-12 04:00:00	7.99778	35.4	0	2010-04-11 20:00:00	2010-04-12 01:00:00	2010-04-12 09:00:00	11.3525	680	37.15	3.98397e+06
267	2010-10-04 06:30:00	2010-10-04 13:29:58	2010-10-05 04:00:00	1.09971	6.2	0	2010-10-04 07:00:00	2010-10-04 17:00:00	2010-10-05 05:00:00	3.4	8.1	4.27	115701
268	2010-10-17 15:00:00	2010-10-17 17:30:02	2010-10-18 02:00:00	1.19934	2.8	0	2010-10-17 19:00:00	2010-10-18 02:15:00	2010-10-18 08:00:00	3.6875	4.27	3.73	8427.25
269	2010-10-18 22:00:00	2010-10-19 23:29:53	2010-10-20 07:00:00	3.39555	14.7	2.8	2010-10-19 12:00:00	2010-10-20 02:30:00	2010-10-20 08:00:00	3.52	17.9	6.39	72342.6
270	2010-11-19 17:00:00	2010-11-20 11:29:57	2010-11-20 19:00:00	2.99884	19.9	0	2010-11-20	2010-11-21 07:15:00	2010-11-21 23:00:00	2.82	75.1	4.27	1.61347e+06
271	2010-12-25 18:00:00	2010-12-25 20:30:02	2010-12-26 02:00:00	7.39798	13.5	0.1	2010-12-25 21:00:00	2010-12-25 21:45:00	2010-12-26 04:00:00	83.875	91.6	86.8	80235.8
272	2011-02-15 15:00:00	2011-02-16 02:29:55	2011-02-16 17:00:00	3.29759	25.4	0	2011-02-15 23:00:00	2011-02-16 09:45:00	2011-02-17 03:00:00	13	29.8	18.3	661838
273	2011-02-18 14:12:00	2011-02-18 21:30:00	2011-02-19 02:00:00	7.99907	40.8	25.4	2011-02-18 16:00:00	2011-02-19 02:15:00	2011-02-19 11:00:00	15.625	115	31.55	2.06964e+06
274	2011-02-25 05:00:00	2011-02-25 21:29:54	2011-02-26 19:00:00	12.2938	94.4	16	2011-02-25 05:00:00	2011-02-26 01:30:00	2011-02-27 01:00:00	17	394	53.125	6.77469e+06
275	2011-03-02 22:06:00	2011-03-02 23:29:54	2011-03-03	3.2965	4.3	96.1	2011-03-02 23:00:00	2011-03-03 02:15:00	2011-03-03 09:00:00	37.2	47.9	38.025	175177
276	2011-03-19 00:06:39	2011-03-19 03:29:59	2011-03-19 04:00:00	4.29995	12.2	0	2011-03-19 02:00:00	2011-03-19 05:15:00	2011-03-19 17:00:00	26.95	43.2	26.325	331483
277	2011-03-19 13:30:00	2011-03-19 14:00:00	2011-03-19 16:00:00	0.2	0.5	12.2	2011-03-19 18:00:00	2011-03-20 16:00:00	2011-03-21 06:00:00	26.65	241	81.2	1.32771e+07
278	2011-03-20 01:00:00	2011-03-20 17:29:54	2011-03-21 18:00:00	19.7918	161.7	12.7	2011-03-20 02:00:00	2011-03-20 21:15:00	2011-03-21 19:00:00	26.5	699	73.725	1.56047e+07
279	2011-03-23 11:00:00	2011-03-23 17:30:01	2011-03-23 19:00:00	1.89953	6.8	174.7	2011-03-23 14:00:00	2011-03-23 20:30:00	2011-03-23 23:00:00	51	64.6	55.025	99238.8
280	2011-03-24 13:00:00	2011-03-25 04:29:59	2011-03-25 13:00:00	2.99996	28.2	181.5	2011-03-24 13:00:00	2011-03-25 06:45:00	2011-03-25 15:00:00	48.175	117	59.65	1.09762e+06
281	2011-05-17 21:00:00	2011-05-18 06:29:58	2011-05-18 15:00:00	0.699926	5.4	11	2011-05-18	2011-05-18 09:15:00	2011-05-18 20:00:00	16.625	21.3	17	184929
282	2011-11-04 01:03:09	2011-11-04 09:30:00	2011-11-04 15:00:00	2.39993	12.2	0	2011-11-04 12:00:00	2011-11-04 15:45:00	2011-11-04 21:00:00	3.9475	5.1	4.47	13772.1
283	2011-11-20 04:00:00	2011-11-20 11:30:02	2011-11-20 19:00:00	6.49925	25	0	2011-11-20 13:00:00	2011-11-20 19:00:00	2011-11-21 18:00:00	3.645	16.5	4.88	459781
284	2012-02-27 02:00:00	2012-02-27 09:30:02	2012-02-27 21:00:00	2.89968	13.9	0	2012-02-27 07:00:00	2012-02-27 23:30:00	2012-02-28 12:00:00	2.785	6.06	4.67	119663
285	2012-03-16 15:00:00	2012-03-17 05:29:58	2012-03-18 19:00:00	18.9945	88.2	0.1	2012-03-16 23:00:00	2012-03-17 12:05:00	2012-03-19 05:00:00	3.325	227	13.1	6.44491e+06
286	2012-03-25 06:30:00	2012-03-25 10:29:55	2012-03-26 01:00:00	11.3955	55.9	0	2012-03-25 12:00:00	2012-03-25 19:00:00	2012-03-26 17:00:00	5.7475	128	25.35	3.16221e+06
287	2012-04-12 12:30:00	2012-04-12 15:29:59	2012-04-12 19:00:00	0.499999	1.3	31.3	2012-04-12 21:00:00	2012-04-13 15:45:00	2012-04-14 23:00:00	7.395	192	20.3	4.83928e+06
288	2012-04-25 18:00:00	2012-04-26 00:30:01	2012-04-26 18:00:00	2.49979	16.9	0.4	2012-04-25 21:00:00	2012-04-26 11:45:00	2012-04-26 21:00:00	7.095	17	9.05	213560
289	2012-11-28 17:00:00	2012-11-29 01:29:57	2012-11-29 04:00:00	1.09968	5.9	2.1	2012-11-29 02:00:00	2012-11-29 04:30:00	2012-11-29 12:00:00	1.8525	2.34	2.2125	8022.15
290	2012-12-01 07:30:00	2012-12-01 13:30:03	2012-12-01 21:00:00	0.5	3.9	25.5	2012-12-01 17:00:00	2012-12-02 20:30:00	2012-12-04 05:00:00	4.01	7.98	5.94	523750
291	2012-12-02 04:00:00	2012-12-02 19:30:05	2012-12-03 05:00:00	2.19919	18.1	29.4	2012-12-02 13:00:00	2012-12-03 06:30:00	2012-12-04 05:00:00	4.0125	14.7	5.94	553867
292	2012-12-12 02:00:00	2012-12-12 22:29:59	2012-12-13 01:00:00	3.39998	19.9	0	2012-12-12 13:00:00	2012-12-13 12:15:00	2012-12-14 01:00:00	1.85	6.58	4.52	119609
293	2012-12-14 16:00:00	2012-12-14 17:29:55	2012-12-14 18:00:00	1.39867	1.9	20.1	2012-12-14 22:00:00	2012-12-14 23:30:00	2012-12-15 01:00:00	3.215	3.54	2.71	3687.75
294	2012-12-17 00:30:00	2012-12-17 01:30:03	2012-12-17 04:00:00	0.3999	1.1	22.7	2012-12-17 17:00:00	2012-12-18 04:00:00	2012-12-22 10:00:00	2.52	4.01	3.54	744031
295	2012-12-17 09:30:00	2012-12-18 01:29:57	2012-12-18 10:00:00	2.79922	19	23.8	2012-12-17 17:00:00	2012-12-18 10:30:00	2012-12-19 01:00:00	2.52	9.54	5.565	210966
296	2012-12-25 21:00:00	2012-12-25 23:29:56	2012-12-26 07:00:00	2.0993	12.3	10.3	2012-12-25 21:00:00	2012-12-26 09:15:00	2012-12-26 23:00:00	4.715	13.7	6.58	222294
297	2013-01-27	2013-01-27 06:30:25	2013-01-27 11:00:00	0.3	2	58.2	2013-01-27 07:00:00	2013-01-27 20:30:00	2013-01-28	4.26	10.4	8.2575	38351.5
298	2013-02-08 06:00:00	2013-02-08 10:29:58	2013-02-08 14:00:00	0.599965	3.9	0.4	2013-02-08 13:00:00	2013-02-08 19:15:00	2013-02-08 20:00:00	3.54	6.26	4.585	16681.5
299	2013-02-19 02:00:00	2013-02-19 16:29:58	2013-02-20 01:00:00	1.69965	7.8	0	2013-02-19 03:00:00	2013-02-20 01:45:00	2013-02-20 05:00:00	3.32	5.94	5.2	10218.1
300	2013-03-05 23:30:00	2013-03-06 19:52:04	2013-03-06 23:00:00	0.2	4.8	0	2013-03-06 07:00:00	2013-03-07 09:30:00	2013-03-07 11:00:00	3.0575	4.01	3.77	1056.98
301	2013-03-07 12:00:00	2013-03-07 21:29:58	2013-03-08 12:00:00	3.69953	17.8	4.8	2013-03-07 12:00:00	2013-03-08 08:30:00	2013-03-08 18:00:00	3.89	11.7	6.58	134610
302	2013-05-05	2013-05-05 22:30:02	2013-05-07	3.49964	42.5	0	2013-05-06 07:00:00	2013-05-07 18:30:00	2013-05-09	1.0975	5.34	2.01	245202
303	2014-02-26 14:00:00	2014-02-26 19:29:59	2014-02-27	4.39999	14.7	0	2014-02-27	2014-02-27 05:30:00	2014-02-27 13:00:00	1.43	2.17	1.4625	13179.9
304	2014-02-27 16:15:00	2014-02-28 00:30:01	2014-03-02 08:00:00	21.4979	205.1	14.7	2014-02-28 03:00:00	2014-02-28 22:07:00	2014-03-02 16:00:00	1.5975	835	25.85	2.598e+07
305	2014-12-11 15:00:00	2014-12-11 21:30:01	2014-12-12 19:00:00	32.6932	84.5	0	2014-12-12 01:00:00	2014-12-12 07:40:00	2014-12-12 23:00:00	0.515	137	19.025	3.87128e+06
306	2014-12-16 14:00:00	2014-12-16 20:30:01	2014-12-17 02:00:00	6.09839	25.8	89.2	2014-12-16 14:15:00	2014-12-18	2014-12-18 04:00:00	7.93	7.93	6.69	299.25
307	2015-01-10 01:15:00	2015-01-10 05:30:02	2015-01-11 11:00:00	11.4921	55.8	0	2015-01-11 02:00:00	2015-01-11 09:00:00	2015-01-11 22:00:00	10.0925	16.3	9.39	221499
308	2015-02-21 21:07:30	2015-02-22 10:30:02	2015-02-22 21:00:00	9.69761	53	0.4	2015-02-21 22:00:00	2015-02-22 22:30:00	2015-02-23 11:00:00	4.0275	30.2	15.2	570202
309	2015-02-27 22:00:00	2015-02-28 10:30:02	2015-02-28 21:00:00	0.79969	6	21	2015-03-01 05:00:00	2015-03-01 20:45:00	2015-03-02 01:00:00	1.435	3.84	2.8125	23976.9
310	2015-03-01 10:10:00	2015-03-01 17:30:01	2015-03-02 21:00:00	5.29877	21.1	6	2015-03-01 12:00:00	2015-03-02 05:45:00	2015-03-03	1.755	5.7	2.235	102125
311	2015-05-06 21:30:00	2015-05-07 16:29:54	2015-05-07 21:00:00	1.5989	11.5	0	2015-05-06 21:45:00	2015-05-07 23:45:00	2015-05-08 12:00:00	0.43	0.6	0.47	3553.53
312	2015-05-14 04:01:02	2015-05-14 05:30:03	2015-05-14 13:00:00	11.6974	32.4	0	2015-05-14 13:00:00	2015-05-14 23:00:00	2015-05-15 20:00:00	0.6	20.5	1.4	433544
313	2015-07-18 00:06:00	2015-07-18 01:30:00	2015-07-18 16:00:00	6.89923	18.3	0	2015-07-18 02:00:00	2015-07-18 12:15:00	2015-07-19 15:00:00	15.9	17.2	13.6	209399
314	2015-07-18 22:00:00	2015-07-19 09:30:01	2015-07-19 21:00:00	21.1962	58.8	18.3	2015-07-19 17:00:00	2015-07-19 20:07:00	2015-07-20 07:00:00	15.075	1360	1.435	5.15268e+06
315	2016-01-04 20:00:00	2016-01-05 04:29:57	2016-01-05 16:00:00	14.1977	58.5	0.1	2016-01-05 08:00:00	2016-01-06 14:52:00	2016-01-07	0.72	141	24.475	3.19541e+06
316	2016-01-30 12:00:00	2016-01-31 05:30:02	2016-01-31 17:00:00	11.4952	38	0	2016-01-30 18:00:00	2016-01-31 15:30:00	2016-02-01 10:00:00	2.0625	212	8.5525	3.85686e+06
317	2016-02-17 21:10:00	2016-02-17 23:30:01	2016-02-18 02:00:00	1.99948	4.6	19.8	2016-02-17 22:00:00	2016-02-18 07:30:00	2016-02-18 17:00:00	4.09	5.7	3.7825	63038.5
318	2016-03-05 12:00:00	2016-03-05 21:30:04	2016-03-06 05:00:00	9.99551	32	0.2	2016-03-05 22:00:00	2016-03-06 07:30:00	2016-03-06 19:00:00	1.94	83.9	8.92	1.30454e+06
319	2016-03-06 21:20:00	2016-03-07 04:29:53	2016-03-07 12:00:00	1.79897	14.1	32.2	2016-03-07 07:00:00	2016-03-07 10:00:00	2016-03-07 20:00:00	8.635	19	9.0125	232812
320	2016-04-07 05:06:39	2016-04-07 05:36:39	2016-04-07 08:00:00	0.9665	1.7	0	2016-04-07 05:21:39	2016-04-07 15:00:00	2016-04-07 17:00:00	1.13	1.26	1.13	468
321	2016-04-07 22:00:00	2016-04-08 01:30:03	2016-04-08 10:00:00	0.999899	5.2	1.7	2016-04-08 16:00:00	2016-04-08 22:15:00	2016-04-13 17:00:00	1.44	4.86	1.85	907754
322	2016-04-08 18:00:00	2016-04-09 20:29:54	2016-04-09 21:00:00	0.899674	6.9	6.9	2016-04-08 18:00:00	2016-04-09 20:30:00	2016-04-11 04:00:00	2.19	8.64	3.61	350583
323	2016-05-05 08:00:00	2016-05-05 08:30:00	2016-05-05 10:00:00	0.2	0.4	0	2016-05-05 08:15:00	2016-05-05 08:15:00	2016-05-05 11:00:00	1.85	2.02	1.85	76.5
324	2016-05-05 15:00:00	2016-05-05 15:30:00	2016-05-05 19:00:00	0.4	1.1	0.4	2016-05-05 19:00:00	2016-05-06 17:45:00	2016-05-07 01:00:00	1.4	2.19	1.54	11796.9
325	2016-10-16 11:00:00	2016-10-16 23:30:02	2016-10-17 03:00:00	0.799938	5.6	1	2016-10-16 22:00:00	2016-10-17 05:45:00	2016-10-18 16:00:00	0.365	0.94	0.12	55515.6
326	2016-11-20 14:00:00	2016-11-20 19:29:59	2016-11-21 07:00:00	7.59989	24.7	1.5	2016-11-20 19:00:00	2016-11-20 23:15:00	2016-11-21 12:00:00	0.525	1.2	0.21	14263.1
327	2016-12-15 06:00:00	2016-12-15 20:29:58	2016-12-16 15:00:00	7.59914	54.1	0	2016-12-15 18:00:00	2016-12-16 12:15:00	2016-12-17 02:00:00	0.2825	31.1	1.4	768990
328	2016-12-21 03:15:00	2016-12-21 19:29:59	2016-12-22 05:00:00	2.2	24.1	54.1	2016-12-21 21:00:00	2016-12-21 22:45:00	2016-12-22 08:00:00	1.2275	5.99	1.4	34632.2
329	2016-12-22 20:00:00	2016-12-23 15:30:04	2016-12-24	5.99976	39.1	24.1	2016-12-23 18:00:00	2016-12-24 02:00:00	2016-12-24 19:00:00	0.8725	91.4	8.8325	2.31241e+06
330	2017-01-08 19:00:00	2017-01-08 20:30:01	2017-01-09 17:00:00	7.79943	24.1	24.3	2017-01-08 19:00:00	2017-01-09 10:15:00	2017-01-10 06:00:00	2.15	26.9	6.67	735846
331	2017-01-09 22:00:00	2017-01-10 22:29:58	2017-01-11 05:00:00	6.2987	28.2	48.4	2017-01-10 10:00:00	2017-01-11 08:15:00	2017-01-11 16:00:00	6.5725	180	51.8	2.90508e+06
332	2017-01-11 11:00:00	2017-01-11 23:29:56	2017-01-12 11:00:00	5.8999	45.5	59.4	2017-01-11 17:00:00	2017-01-12 14:30:00	2017-01-12 20:00:00	55.25	146	86.725	1.19161e+06
333	2017-01-18 10:00:00	2017-01-20 05:29:56	2017-01-20 14:00:00	12.5957	62.9	1.2	2017-01-18 20:00:00	2017-01-20 15:00:00	2017-01-20 23:00:00	7.59	186	62.575	2.1819e+06
334	2017-01-21 17:12:00	2017-01-22 08:29:58	2017-01-23 12:00:00	10.499	75	62.9	2017-01-22 06:00:00	2017-01-22 18:45:00	2017-01-24	33.45	223	84.3	5.39986e+06
335	2017-02-10 04:00:00	2017-02-10 12:29:57	2017-02-11 12:00:00	3.39874	14.6	23.4	2017-02-10 07:00:00	2017-02-11 06:15:00	2017-02-11 17:00:00	11.125	22.2	17.025	221403
336	2017-02-16 22:00:00	2017-02-17 09:30:01	2017-02-18 10:00:00	12.1996	70.2	0	2017-02-17 08:00:00	2017-02-17 19:07:00	2017-02-18 15:00:00	9.86	917	77.825	1.48707e+07
337	2017-02-19 12:00:00	2017-02-20 08:29:59	2017-02-20 09:00:00	0.299992	2.3	70.2	2017-02-19 12:15:00	2017-02-19 12:45:00	2017-02-20 10:00:00	54.7	61.8	43.1	76560
338	2017-02-22 07:00:00	2017-02-22 08:30:01	2017-02-22 10:00:00	0.199967	0.5	74.9	2017-02-22 10:00:00	2017-02-22 19:45:00	2017-02-22 23:00:00	35.225	36.6	31.775	43231.2
339	2017-02-25 19:00:00	2017-02-25 21:30:02	2017-02-26 12:00:00	1.39954	4.9	2.9	2017-02-25 19:00:00	2017-02-26 07:00:00	2017-02-26 13:00:00	21.15	30.8	23.6	127991
340	2017-05-05 23:00:00	2017-05-06 09:29:53	2017-05-06 16:00:00	1.09958	5.8	0	2017-05-06 05:00:00	2017-05-07 09:00:00	2017-05-08 14:00:00	3.64	10.5	5.31	534949
341	2018-01-07 21:12:00	2018-01-09 07:29:56	2018-01-09 11:00:00	19.486	89.8	0	2018-01-08 13:00:00	2018-01-09 18:00:00	2018-01-10 23:00:00	1.01	91.5	0.79	2.60058e+06
342	2018-02-26 14:04:00	2018-02-26 15:30:00	2018-02-26 17:00:00	3.19957	5.7	0	2018-02-26 22:00:00	2018-02-27 00:45:00	2018-02-27 03:00:00	0.715	1.01	0.69	2655
343	2018-02-27 07:03:31	2018-02-27 07:33:31	2018-02-27 09:00:00	1.60586	1.8	5.7	2018-02-27 07:18:31	2018-02-27 08:45:00	2018-02-28 15:00:00	0.6	0.6	0.5325	3647.89
344	2018-03-01 20:01:39	2018-03-02 09:30:00	2018-03-02 11:00:00	9.99979	33.3	11.2	2018-03-02 02:00:00	2018-03-02 20:30:00	2018-03-03 10:00:00	0.74	22	5.9175	383478
345	2018-03-10 05:00:00	2018-03-10 09:29:58	2018-03-10 20:00:00	4.599	21.9	0	2018-03-10 14:00:00	2018-03-11 00:45:00	2018-03-11 14:00:00	1.435	7.93	6.3	204815
346	2018-03-11 06:00:00	2018-03-11 06:30:00	2018-03-11 08:00:00	0.2	0.5	21.9	2018-03-11 06:15:00	2018-03-11 06:30:00	2018-03-11 09:00:00	7.59	7.59	6.85	234.818
347	2018-03-13 17:00:26	2018-03-13 17:30:26	2018-03-13 19:00:00	13.6094	15.1	29.8	2018-03-13 18:00:00	2018-03-14 06:30:00	2018-03-14 22:00:00	4.0275	15	7.59	388224
348	2018-03-16 08:15:00	2018-03-16 12:29:56	2018-03-16 16:00:00	3.79822	11.4	47.7	2018-03-16 19:00:00	2018-03-17 01:30:00	2018-03-18	7.0975	18.6	7.6875	569713
349	2018-10-12 12:04:36	2018-10-12 15:29:56	2018-10-12 23:00:00	7.49542	18.3	0	2018-10-13	2018-10-13 02:00:00	2018-10-14 16:00:00	0.2625	0.79	0.1	41114
350	2018-11-21 16:00:51	2018-11-21 16:30:51	2018-11-21 20:00:00	6.93984	16.8	0.4	2018-11-22 01:00:00	2018-11-22 05:00:00	2018-11-22 14:00:00	0.4325	1.4	0.645	21540.2
351	2018-12-04 21:10:00	2018-12-04 22:29:59	2018-12-04 23:00:00	12.1	12.7	0	2018-12-05 18:00:00	2018-12-05 22:30:00	2018-12-08 18:00:00	0.715	1.13	1.02	2.35646e+06
352	2018-12-05 07:06:00	2018-12-06 03:29:58	2018-12-06 09:00:00	10.6989	67.5	12.7	2018-12-05 18:00:00	2018-12-06 12:00:00	2018-12-08 03:00:00	0.715	86.4	1.485	2.28663e+06
353	2019-01-11 18:06:00	2019-01-11 21:30:02	2019-01-12 05:00:00	8.99297	23.3	8.2	2019-01-12 03:00:00	2019-01-12 05:45:00	2019-01-12 07:00:00	1.375	4.04	1.82	9279.28
354	2019-01-13 23:10:00	2019-01-14 02:29:56	2019-01-14 09:00:00	13.7931	41.9	23.3	2019-01-14 08:00:00	2019-01-14 18:15:00	2019-01-15 13:00:00	1.985	16.7	5.08	583040
355	2019-01-15 02:20:00	2019-01-15 08:29:58	2019-01-15 13:00:00	6.89889	19	65.2	2019-01-15 02:35:00	2019-01-15 02:45:00	2019-01-15 16:00:00	12.2	11.7	5.0125	30.375
356	2019-01-16 10:01:27	2019-01-16 11:29:58	2019-01-17 10:00:00	29.9857	109.4	84.2	2019-01-16 12:00:00	2019-01-17 09:07:00	2019-01-17 20:00:00	7.4475	997	82.4	1.69305e+07
357	2019-01-31 02:07:30	2019-01-31 05:29:56	2019-01-31 08:00:00	9.39585	27.6	0	2019-01-31 12:00:00	2019-01-31 16:30:00	2019-01-31 23:00:00	4.2775	20	9.58	279229
358	2019-02-02 13:03:09	2019-02-02 23:29:56	2019-02-05 01:00:00	13.5944	110.9	98.3	2019-02-02 14:00:00	2019-02-02 15:15:00	2019-02-05 06:00:00	342.25	532	123.75	1.42596e+06
359	2019-02-13 17:20:00	2019-02-14 03:30:03	2019-02-14 05:00:00	14.4894	59.2	24.6	2019-02-14 02:00:00	2019-02-14 13:22:00	2019-02-14 19:00:00	23.3	432	136.25	5.29914e+06
360	2019-03-05 13:08:34	2019-03-05 23:30:02	2019-03-06 19:00:00	25.888	60	29.5	2019-03-06 06:00:00	2019-03-06 21:30:00	2019-03-07 15:00:00	14.6	149	58.175	4.70605e+06
361	2019-05-06 06:30:00	2019-05-06 07:29:57	2019-05-06 09:00:00	0.699666	1	0	2019-05-06 15:00:00	2019-05-06 15:15:00	2019-05-06 18:00:00	4.83	5.1	4.7625	475.875
362	2019-05-10 13:30:00	2019-05-10 18:30:02	2019-05-10 21:00:00	2.19896	4.5	3.1	2019-05-10 13:45:00	2019-05-10 13:45:00	2019-05-10 22:00:00	5.41	5.41	5.13	2458.91
363	2019-05-15 21:00:00	2019-05-15 22:30:01	2019-05-16 01:00:00	4.79847	9.7	5.7	2019-05-15 23:00:00	2019-05-16 11:45:00	2019-05-17	4	6.04	4.38	52182
364	2019-05-18 13:15:00	2019-05-18 17:30:02	2019-05-19	3.29918	12.2	9.7	2019-05-18 23:00:00	2019-05-19 22:45:00	2019-05-20 21:00:00	3.84	5.48	4.15	156766
365	2019-05-19 11:20:00	2019-05-19 12:30:04	2019-05-19 14:00:00	0.99933	1.7	21.9	2019-05-19 21:00:00	2019-05-20 06:45:00	2019-05-20 10:00:00	4.92	6.07	5.2	21045.5
366	2019-05-23 18:20:00	2019-05-23 19:29:58	2019-05-23 21:00:00	0.499933	1.1	15.2	2019-05-23 18:35:00	2019-05-23 19:45:00	2019-05-24 01:00:00	4.17	4.42	4.17	4050
367	2019-05-26 09:20:00	2019-05-26 11:29:59	2019-05-26 12:00:00	3.9	7.4	5.3	2019-05-26 10:00:00	2019-05-26 22:30:00	2019-05-27 17:00:00	4.57	6.74	4.98	116611
368	2019-11-19 20:03:00	2019-11-19 20:33:00	2019-11-20 06:00:00	1.905	9	0.1	2019-11-19 20:18:00	2019-11-20 13:30:00	2019-11-20 16:00:00	0.36	0.79	0.6	4441.85
369	2019-11-26 22:12:00	2019-11-27 02:30:03	2019-11-27 06:00:00	4.29831	13.5	0	2019-11-27 09:00:00	2019-11-27 11:45:00	2019-11-27 23:00:00	0.8725	2.29	0.5475	30165.8
370	2019-11-27 16:06:39	2019-11-28 00:29:59	2019-11-28 06:00:00	6.89996	29.5	13.5	2019-11-28 07:00:00	2019-11-28 10:00:00	2019-11-28 15:00:00	1.0725	2.28	1.1575	16970.8
371	2019-11-28 13:03:31	2019-11-28 15:30:02	2019-11-28 17:00:00	1.89901	4.9	43	2019-11-28 16:00:00	2019-11-28 16:45:00	2019-11-29 06:00:00	1.35	2.09	1.32	24222.5
372	2019-11-29 08:00:00	2019-11-29 08:30:00	2019-11-29 19:00:00	0.2	1.1	47.9	2019-11-29 08:15:00	2019-11-29 08:15:00	2019-11-29 20:00:00	1.32	1.32	0.55	133.277
373	2019-12-03 17:30:00	2019-12-04 02:30:01	2019-12-04 04:00:00	7.49886	29.9	7.8	2019-12-04 04:00:00	2019-12-04 19:15:00	2019-12-05 13:00:00	0.895	7.76	2.66	268943
374	2019-12-06 03:00:00	2019-12-06 07:29:58	2019-12-06 08:00:00	6.09842	7.7	32.7	2019-12-06 21:00:00	2019-12-07 01:45:00	2019-12-07 02:00:00	1.95	2.12	1.9925	174.038
375	2019-12-06 17:20:00	2019-12-07 04:30:04	2019-12-07 21:00:00	4.29491	14.9	38.6	2019-12-06 21:00:00	2019-12-08 20:30:00	2019-12-09 09:00:00	1.95	7.83	4.27	122137
376	2019-12-22 12:00:00	2019-12-22 19:30:02	2019-12-23 10:00:00	6.9976	40.1	0	2019-12-23	2019-12-23 13:15:00	2019-12-23 20:00:00	1.5625	6.73	4.97	67602.5
377	2019-12-25 05:20:00	2019-12-25 21:29:58	2019-12-25 22:00:00	21.2996	78.4	40.1	2019-12-25 23:00:00	2019-12-26 03:52:00	2019-12-27 21:00:00	3.1725	124	2.7	2.477e+06
378	2020-03-12 02:15:00	2020-03-12 05:30:01	2020-03-13 01:00:00	8.49722	49.9	15.5	2020-03-12 13:00:00	2020-03-12 21:00:00	2020-03-13 07:00:00	1.27	14.3	5.29	142004
379	2020-03-13 18:30:00	2020-03-14 21:29:58	2020-03-14 22:00:00	2.29938	7.3	65.4	2020-03-13 18:45:00	2020-03-13 18:45:00	2020-03-14 23:00:00	4.23	4.23	2.0675	103.341
380	2020-03-16 06:00:00	2020-03-16 10:29:58	2020-03-16 13:00:00	13.2993	38.5	57.2	2020-03-16 14:00:00	2020-03-16 21:30:00	2020-03-18 01:00:00	1.7425	103	11.3	2.91096e+06
381	2020-03-19 03:06:00	2020-03-19 05:29:55	2020-03-19 06:00:00	2.19759	3.4	48.9	2020-03-19 05:00:00	2020-03-19 09:15:00	2020-03-19 11:00:00	6.95	7.79	7.45	4743.75
382	2020-03-22 07:20:00	2020-03-22 11:30:02	2020-03-23 01:00:00	7.79672	26.7	6.5	2020-03-22 17:00:00	2020-03-23 10:00:00	2020-03-24 02:00:00	4.1675	17.4	8.13	552380
383	2020-04-05 18:00:00	2020-04-05 23:29:53	2020-04-06 04:00:00	24.9825	81.3	0.9	2020-04-06 01:00:00	2020-04-06 08:52:00	2020-04-06 23:00:00	3.08	506	69.5	7.80939e+06
384	2020-04-07	2020-04-07 14:29:58	2020-04-07 21:00:00	5.39918	32	82.3	2020-04-07	2020-04-08 05:15:00	2020-04-08 17:00:00	70.925	115	66.9	1.52555e+06
385	2020-06-05	2020-06-05 01:29:55	2020-06-05 02:00:00	0.133155	0.3	0	2020-06-05	2020-06-05 19:15:00	2020-06-07 18:00:00	2.57	3.6	2.68	189593
386	2020-06-05 09:20:00	2020-06-06 00:31:09	2020-06-06 05:00:00	0.6	3.4	0.3	2020-06-05 12:00:00	2020-06-06 18:15:00	2020-06-07 18:00:00	2.37	4.8	2.68	205131
387	2020-12-24 03:20:00	2020-12-24 04:29:58	2020-12-24 11:00:00	1.1997	1.9	0	2020-12-24 03:35:00	2020-12-25 04:15:00	2020-12-25 13:00:00	0.54	0.73	0.54	7137
388	2020-12-27 11:20:00	2020-12-28 08:29:58	2020-12-28 19:00:00	8.19953	54.7	2	2020-12-28 01:00:00	2020-12-28 18:45:00	2020-12-29 07:00:00	1.1575	3.04	1.31	71021.3
389	2021-01-23 04:00:00	2021-01-23 17:00:23	2021-01-23 21:00:00	0.7	5.6	2.6	2021-01-23 12:00:00	2021-01-23 17:00:00	2021-01-24 03:00:00	2.78	5.23	2.83	33358.5
390	2021-01-25 06:00:00	2021-01-25 09:29:57	2021-01-25 10:00:00	0.199932	0.6	14.5	2021-01-25 06:00:00	2021-01-25 06:15:00	2021-01-25 12:00:00	3.25	3.25	2.83	1307.25
391	2021-01-28 11:00:00	2021-01-28 14:30:03	2021-01-29 21:00:00	16.3927	86.1	12.5	2021-01-28 20:00:00	2021-01-29 06:07:00	2021-01-30 05:00:00	3.6025	60.4	4.92	1.30638e+06
392	2021-03-07 04:20:00	2021-03-07 05:50:37	2021-03-07 07:00:00	0.3	0.9	1.4	2021-03-07 04:35:00	2021-03-07 06:45:00	2021-03-07 08:00:00	1.01	1.13	1.01	216
393	2021-03-09 03:15:00	2021-03-09 21:30:01	2021-03-11 21:00:00	2.4997	49.5	2.3	2021-03-10 03:00:00	2021-03-11 05:15:00	2021-03-11 22:00:00	1.495	3.82	2.73	79229.5
394	2021-07-25 04:20:00	2021-07-25 05:50:37	2021-07-25 07:00:00	0.3	0.9	0	2021-07-25 05:00:00	2021-07-25 08:45:00	2021-07-25 18:00:00	8.12	9.32	1.3875	86989.2
