# Supplementary material for: Leveraging a time-series event separation method to disentangle time-varying hydrologic controls on streamflow – application to wildfire-affected catchments
Source: Copernicus journal article supplement (doi:10.5194/hess-29-27-2025), 2025-01-03
Supplement: Supplementary file 2 [file hess-29-27-2025-supplement.zip]

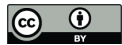

## *Supplement of*

# **Leveraging a time-series event separation method to disentangle time-varying hydrologic controls on streamflow – application to wildfire-affected catchments**

**Haley A. Canham et al.**

*Correspondence to:* Haley A. Canham ([haley.canham@usu.edu](mailto:haley.canham@usu.edu))

- [hess-29-27-2025-supplement-title-page.pdf](#)
- [Supplemental\\_Info.pdf](#)
- [TableS4](#)
  - [ArroyoSeco\\_EventAttributes.xlsx](#)
  - [AshCanyonCreek\\_EventAttributes.xlsx](#)
  - [CacheLaPoudreRiver\\_EventAttributes.xlsx](#)
  - [CampCreek\\_EventAttributes.xlsx](#)
  - [ClearCreek\\_EventAttributes.xlsx](#)
  - [ShitikeCreek\\_EventAttributes.xlsx](#)
  - [ThompsonRiver\\_EventAttributes.xlsx](#)
  - [ValleyCreek\\_EventAttributes.xlsx](#)
  - [WetBottomCreek\\_EventAttributes.xlsx](#)

The copyright of individual parts of the supplement might differ from the article licence.
