# Supplementary material for: Leveraging a time-series event separation method to disentangle time-varying hydrologic controls on streamflow – application to wildfire-affected catchments
Source: Copernicus journal article supplement (doi:10.5194/hess-29-27-2025), 2025-01-03
Supplement: Supplementary file 3 [file AshCanyonCreek_EventAttributes.xlsx]

## Sheet: Events_Sorting - Copy
	storm_start	storm_peak	storm_end	storm_peak_60int_mm/hr	storm_depth_mm	antPrecip_mm	flow_start	flow_peak	flow_end	flow_start_mag_cfs	flow_peak_mag_cfs	flow_end_mag_cfs	volume_ft3
1	1991-02-27 14:00:00	1991-03-02 22:29:58	1991-03-05 17:00:00	4.8986	99.7	0	1991-03-03 06:00:00	1991-03-03 18:00:00	1991-03-05 18:00:00	1.85	7.8	2.5	217759
2	1992-10-21 00:08:34	1992-10-21 02:29:59	1992-10-21 06:00:00	2.99973	8.3	0	1992-10-21 06:00:00	1992-10-21 08:00:00	1992-10-21 15:00:00	1.115	2.5	1.1	16518
3	1992-10-26 15:00:00	1992-10-26 15:30:00	1992-10-27	0.1	0.6	8.3	1992-10-26 15:15:00	1992-10-27 03:45:00	1992-10-27 10:00:00	0.86	1.1	1	3066.48
4	1992-10-28 02:30:00	1992-10-28 03:29:57	1992-10-28 04:00:00	0.399866	0.6	3.2	1992-10-28 07:00:00	1992-10-28 09:15:00	1992-10-28 11:00:00	1.9	2.4	2.225	2508.75
5	1992-10-28 19:00:00	1992-10-28 22:30:03	1992-10-30 19:00:00	1.3996	18	3.8	1992-10-28 23:00:00	1992-10-29 15:45:00	1992-10-31	1.725	3.3	1.6	74857.2
6	1992-12-06 02:06:39	1992-12-06 03:29:57	1992-12-07 17:00:00	6.09604	48.9	0	1992-12-08 15:00:00	1992-12-08 16:45:00	1992-12-12 22:00:00	1.5	1.7	1.6	265996
7	1992-12-08 13:00:00	1992-12-08 21:29:57	1992-12-09 22:00:00	2.29922	24.8	48.9	1992-12-08 15:00:00	1992-12-09 14:15:00	1992-12-10	1.5	4.3	2.6	106088
8	1993-01-05 19:30:00	1993-01-06 03:29:59	1993-01-07 23:00:00	2.8	37.6	9	1993-01-05 19:45:00	1993-01-06 15:15:00	1993-01-08	1.6	2.1	1.7	13109.9
9	1993-01-17 12:00:00	1993-01-17 14:30:02	1993-01-17 18:00:00	0.399934	1.7	42.5	1993-01-17 12:15:00	1993-01-17 12:15:00	1993-01-17 19:00:00	1.6	1.6	1.5	183.333
10	1993-01-19 09:00:00	1993-01-20 09:29:58	1993-01-21 07:00:00	2.99979	39.4	27.3	1993-01-20 07:00:00	1993-01-20 19:00:00	1993-01-21 13:00:00	1.85	6.8	2.9	173558
11	1993-03-12 21:00:00	1993-03-12 22:30:01	1993-03-13 03:00:00	0.199967	0.8	0.1	1993-03-13 15:00:00	1993-03-14 03:00:00	1993-03-16 04:00:00	3.1	3.6	3.4	107508
12	1993-03-13 14:00:00	1993-03-13 22:30:03	1993-03-14 04:00:00	1	5.8	0.9	1993-03-13 15:00:00	1993-03-14 15:30:00	1993-03-15 05:00:00	3.1	4.5	3.8	48567.4
13	1993-03-16	1993-03-16 00:30:00	1993-03-16 02:00:00	0.1	0.3	6.7	1993-03-16 13:00:00	1993-03-17 02:00:00	1993-03-19 06:00:00	3.475	5	4.05	547954
14	1993-03-16 20:00:00	1993-03-17 02:30:01	1993-03-17 04:00:00	1.89987	6	7.7	1993-03-17	1993-03-17 13:15:00	1993-03-18 11:00:00	4.2	11	5	378645
15	1993-03-27 14:00:00	1993-03-28 03:29:57	1993-03-28 04:00:00	2.99985	21.7	29.1	1993-03-27 14:15:00	1993-03-27 14:15:00	1993-03-28 08:00:00	3.3	3.3	3.2	2802.68
16	1993-03-31 22:30:00	1993-04-01 00:29:58	1993-04-01 02:00:00	0.499966	1.3	21.9	1993-03-31 22:45:00	1993-03-31 22:45:00	1993-04-01 05:00:00	3.7	3.7	3.6	910.8
17	1993-04-17 15:30:00	1993-04-17 17:29:58	1993-04-17 21:00:00	0.699966	2.5	1	1993-04-17 15:45:00	1993-04-17 15:45:00	1993-04-17 23:00:00	3.4	3.4	3.2	642.414
18	1993-05-25 02:05:00	1993-05-25 03:28:54	1993-05-25 09:00:00	1.2	2.9	0	1993-05-25 09:00:00	1993-05-25 09:15:00	1993-05-25 13:00:00	4.95	5	4.775	1372.5
19	1993-06-02 04:20:00	1993-06-02 04:50:00	1993-06-02 06:00:00	0.3	0.6	7	1993-06-02 04:35:00	1993-06-02 04:45:00	1993-06-02 10:00:00	4.2	4.2	4	1465.71
20	1993-10-13 06:00:00	1993-10-13 13:30:02	1993-10-14	0.2	2.3	1.4	1993-10-13 22:00:00	1993-10-14 22:45:00	1993-10-16 19:00:00	1.8	2.4	2.2	72806.1
21	1993-10-14 23:00:00	1993-10-15 03:29:58	1993-10-15 14:00:00	4.59925	10.1	3.7	1993-10-15 07:00:00	1993-10-15 07:30:00	1993-10-15 15:00:00	2.65	2.7	2.6	666.562
22	1993-10-16 04:30:00	1993-10-16 14:29:56	1993-10-16 17:00:00	1.59958	5.6	13.3	1993-10-16 04:45:00	1993-10-16 04:45:00	1993-10-16 18:00:00	2.4	2.4	2.25	596.462
23	1994-11-04 12:00:00	1994-11-05 03:29:59	1994-11-06 06:00:00	6.39975	28.2	4.5	1994-11-05 04:00:00	1994-11-05 13:15:00	1994-11-06 16:00:00	1.575	3.6	1.9	111883
24	1994-11-27 12:00:00	1994-11-27 12:30:00	1994-11-27 16:00:00	0.1	0.5	34.9	1994-11-27 12:15:00	1994-11-27 12:15:00	1994-11-27 17:00:00	1.5	1.5	1.4	170.526
25	1994-12-02 13:00:00	1994-12-03 09:50:32	1994-12-04	0.8	9.4	0.5	1994-12-02 13:15:00	1994-12-03 17:15:00	1994-12-04 03:00:00	1.5	2	1.7	15813.2
26	1995-01-09 02:00:00	1995-01-10 02:54:55	1995-01-11 10:00:00	6.8	91.3	65.1	1995-01-09 18:00:00	1995-01-10 12:15:00	1995-01-11 11:00:00	2	3.7	2.2	88825.6
27	1995-01-12 03:00:00	1995-01-12 04:30:01	1995-01-12 13:00:00	0.799901	2.6	94.2	1995-01-12 09:00:00	1995-01-13 12:15:00	1995-01-15 11:00:00	2	3.4	2.8	304998
28	1995-01-12 22:00:00	1995-01-13 00:30:26	1995-01-13 10:00:00	0.4	2.3	96.8	1995-01-13 04:00:00	1995-01-13 20:15:00	1995-01-15 11:00:00	2.2	5.1	2.8	301642
29	1995-01-13 17:00:00	1995-01-14 03:29:59	1995-01-15 05:00:00	3.89994	35	99.1	1995-01-13 17:00:00	1995-01-14 11:45:00	1995-01-15 11:00:00	3.925	5.6	2.8	146801
30	1995-01-26 05:00:00	1995-01-26 17:34:08	1995-01-28 04:00:00	1.5	21.3	19.5	1995-01-26 05:15:00	1995-01-26 11:45:00	1995-01-28 06:00:00	1.6	1.7	1.6	4680
31	1995-01-31 04:03:09	1995-01-31 04:33:09	1995-01-31 12:00:00	1.863	4.1	21.3	1995-01-31 12:00:00	1995-01-31 19:00:00	1995-02-01 06:00:00	2.45	3	2.7	17356.9
32	1995-01-31 19:00:00	1995-01-31 19:30:00	1995-01-31 21:00:00	0.1	0.3	25.4	1995-02-01 16:00:00	1995-02-01 19:00:00	1995-02-02 07:00:00	3	3.2	2.75	10796.2
33	1995-03-05 04:20:00	1995-03-05 04:50:00	1995-03-05 10:00:00	0.266667	0.9	55.2	1995-03-05 04:35:00	1995-03-05 04:45:00	1995-03-05 21:00:00	2.3	2.3	2.2	2618.31
34	1995-03-08 04:15:00	1995-03-09 06:29:59	1995-03-11 23:00:00	9.69928	180.1	37.6	1995-03-09 02:00:00	1995-03-10 12:00:00	1995-03-12	2.325	10	4.825	720368
35	1995-03-14 12:00:00	1995-03-14 19:54:29	1995-03-15 01:00:00	0.1	1	1.4	1995-03-14 12:00:00	1995-03-14 21:30:00	1995-03-15 04:00:00	4	5	4.225	17611.2
36	1995-03-19 13:10:00	1995-03-19 15:30:01	1995-03-20	3.39957	19.5	4.9	1995-03-19 23:00:00	1995-03-20 13:15:00	1995-03-21 02:00:00	4	6.7	4.8	63845
37	1995-03-20 07:15:00	1995-03-20 14:30:00	1995-03-23 06:00:00	2.99999	62.9	24.4	1995-03-20 08:00:00	1995-03-21 12:00:00	1995-03-23 09:00:00	4.125	7	3.5	243123
38	1995-04-06 04:30:00	1995-04-06 06:07:26	1995-04-07 04:00:00	0.4	2.4	0	1995-04-06 04:45:00	1995-04-06 04:45:00	1995-04-07 05:00:00	4.2	4.2	3.7	846.186
39	1995-04-26 05:00:00	1995-04-26 21:30:00	1995-04-30 09:00:00	1.69957	25	0	1995-04-26 16:00:00	1995-05-01 07:15:00	1995-05-01 12:00:00	3.4	13	10.5	35249
40	1995-04-30 17:00:00	1995-05-01 02:29:58	1995-05-01 12:00:00	1.99942	16.6	25	1995-04-30 18:00:00	1995-05-01 15:45:00	1995-05-01 19:00:00	5.65	17	13	65926.8
41	1995-05-16 15:00:00	1995-05-16 15:30:00	1995-05-16 19:00:00	0.1	0.5	49.1	1995-05-16 15:00:00	1995-05-17 18:30:00	1995-05-18 07:00:00	4.35	6	5.2	48153.4
42	1995-05-22 10:06:39	1995-05-22 12:30:04	1995-05-23 02:00:00	1.39949	8.4	15	1995-05-22 13:00:00	1995-05-22 19:30:00	1995-05-23 07:00:00	7.775	11	8.025	81194.4
43	1995-05-23 11:00:00	1995-05-23 21:29:59	1995-05-24 03:00:00	0.799996	6.3	22.9	1995-05-23 13:00:00	1995-05-23 19:45:00	1995-05-24 05:00:00	8.025	9.5	7.9	34933.4
44	1995-05-24 10:00:00	1995-05-24 13:28:39	1995-05-24 17:00:00	0.2	1	29.2	1995-05-24 18:00:00	1995-05-25 16:00:00	1995-05-26 06:00:00	7.875	8.5	7.225	39822.2
45	1995-05-31 05:00:00	1995-06-01 00:57:43	1995-06-01 04:00:00	0.1	2.4	2.9	1995-05-31 14:00:00	1995-05-31 17:15:00	1995-06-01 06:00:00	9.675	13	11	95534.6
46	1995-06-01 11:00:00	1995-06-01 11:30:00	1995-06-01 19:00:00	0.8	1.7	2.4	1995-06-01 13:00:00	1995-06-02 18:30:00	1995-06-02 21:00:00	10.5	14	13	38134
47	1995-06-06 09:00:00	1995-06-06 13:29:58	1995-06-06 16:00:00	1.09971	4.3	1.7	1995-06-06 09:15:00	1995-06-06 09:15:00	1995-06-06 19:00:00	11	11	10	16223.1
48	1995-06-07 09:00:00	1995-06-07 09:30:00	1995-06-07 16:00:00	0.1	0.8	6	1995-06-07 09:15:00	1995-06-07 09:15:00	1995-06-08	10	10	9.7	6574.58
49	1995-12-10 19:30:00	1995-12-12 00:29:54	1995-12-13 09:00:00	10.7931	126.8	1.1	1995-12-10 21:00:00	1995-12-12 14:45:00	1995-12-13 13:00:00	2.675	15	3.6	492585
50	1995-12-28	1995-12-28 00:30:00	1995-12-28 02:00:00	0.1	0.3	5.3	1995-12-28 00:15:00	1995-12-28 03:00:00	1995-12-28 05:00:00	2.9	3	2.8	502.105
51	1995-12-28 18:00:00	1995-12-28 18:30:00	1995-12-28 20:00:00	0.2	0.4	0.3	1995-12-28 18:15:00	1995-12-29 16:15:00	1995-12-29 19:00:00	2.9	3.1	2.925	2501.48
52	1995-12-29 02:00:00	1995-12-29 02:30:00	1995-12-29 04:00:00	0.1	0.3	0.7	1995-12-29 02:15:00	1995-12-30 02:45:00	1995-12-31 21:00:00	3	3.2	3.125	43104
53	1996-01-15 01:03:19	1996-01-15 06:30:00	1996-01-17 04:00:00	2.69994	41.4	0	1996-01-15 10:00:00	1996-01-16 10:45:00	1996-01-17 07:00:00	2.9	6.5	3.4	106580
54	1996-03-02 18:00:00	1996-03-02 18:30:00	1996-03-02 21:00:00	0.1	0.4	1	1996-03-03 15:00:00	1996-03-03 18:15:00	1996-03-03 21:00:00	4.075	6.1	5.2	14003.4
55	1996-03-03 08:20:00	1996-03-04 17:29:54	1996-03-05 15:00:00	4.19828	62.2	1.4	1996-03-03 15:00:00	1996-03-04 16:00:00	1996-03-05 16:00:00	4.075	8.5	4.55	152540
56	1996-04-16 20:00:00	1996-04-16 20:30:00	1996-04-16 23:00:00	0.1	0.4	9.1	1996-04-16 20:15:00	1996-04-17 00:15:00	1996-04-17 03:00:00	11	13	9.575	6075
57	1996-05-17 09:00:00	1996-05-17 19:30:05	1996-05-18 06:00:00	0.5	5.2	32.5	1996-05-17 11:00:00	1996-05-18 01:40:00	1996-05-18 07:00:00	15.5	27	17.75	79394.1
58	1996-05-27 02:00:00	1996-05-27 02:30:00	1996-05-27 04:00:00	2.4	3.5	0.1	1996-05-27 05:00:00	1996-05-27 06:10:00	1996-05-27 09:00:00	11.5	13	10.75	5152.5
59	1996-06-24 18:00:00	1996-06-25 00:29:55	1996-06-25 22:00:00	1.99986	20.1	0	1996-06-24 18:00:00	1996-06-26 15:03:00	1996-06-26 21:00:00	8.75	12	9.675	38228.7
60	1996-11-15 11:00:00	1996-11-15 13:30:02	1996-11-15 18:00:00	2.49855	4.2	0	1996-11-15 16:00:00	1996-11-15 18:47:00	1996-11-15 21:00:00	3.45	3.7	3.3	1175.92
61	1996-11-16 14:00:00	1996-11-16 23:30:04	1996-11-18 20:00:00	4.79843	66.1	4.5	1996-11-16 14:00:00	1996-11-18 03:32:00	1996-11-18 21:00:00	3.45	17	9.125	538384
62	1996-11-19 12:15:00	1996-11-19 14:30:00	1996-11-19 22:00:00	1.09987	3.6	70.6	1996-11-19 14:00:00	1996-11-19 15:02:00	1996-11-20 02:00:00	9.35	11	8.7	28045.3
63	1996-11-21 12:05:27	1996-11-21 23:30:03	1996-11-22 03:00:00	6.49848	31.9	71.7	1996-11-21 15:00:00	1996-11-22	1996-11-22 06:00:00	7.725	12	9.375	42788.2
64	1996-11-30 17:00:00	1996-12-01 02:29:58	1996-12-01 06:00:00	0.799926	4.2	0	1996-11-30 19:00:00	1996-12-01 07:17:00	1996-12-01 10:00:00	7.45	8.4	7.65	5952
65	1996-12-04 14:00:00	1996-12-05 02:30:02	1996-12-06 04:00:00	7.59963	53.8	4.5	1996-12-04 22:00:00	1996-12-05 06:17:00	1996-12-06 07:00:00	7.975	16	10	400261
66	1996-12-07 11:20:00	1996-12-07 12:29:58	1996-12-07 14:00:00	0.499933	1.1	54.1	1996-12-07 13:00:00	1996-12-07 20:48:00	1996-12-07 22:00:00	9.45	11	10.1	1400.79
67	1996-12-09 05:15:00	1996-12-09 18:30:01	1996-12-12 04:00:00	4.99897	73.1	55.2	1996-12-09 06:00:00	1996-12-12 05:48:00	1996-12-12 09:00:00	9.575	20	14.5	57195.3
68	1996-12-29 10:30:00	1996-12-29 16:30:03	1996-12-30 04:00:00	2.2	16.2	51.1	1996-12-29 11:00:00	1996-12-29 18:03:00	1996-12-30 10:00:00	7.975	20	11.25	289695
69	1997-01-04 20:20:00	1997-01-05 00:29:56	1997-01-05 04:00:00	0.799897	2.4	143.4	1997-01-05 07:00:00	1997-01-05 08:48:00	1997-01-05 11:00:00	13	15	12.75	9517.5
70	1997-01-05 12:00:00	1997-01-05 13:30:07	1997-01-05 16:00:00	0.2	0.7	2.4	1997-01-05 12:00:00	1997-01-05 13:33:00	1997-01-05 17:00:00	13.25	15	12	16928.3
71	1997-01-28 02:00:00	1997-01-28 02:30:00	1997-01-28 10:00:00	1	2.2	87.7	1997-01-28 06:00:00	1997-01-29 01:15:00	1997-01-29 07:00:00	6.85	13	8.45	63068.4
72	1997-02-04 05:00:00	1997-02-04 12:30:50	1997-02-04 20:00:00	0.2	1.3	0.2	1997-02-04 05:00:00	1997-02-05 18:30:00	1997-02-06 05:00:00	8.05	12	7.45	166171
73	1997-04-08 19:00:00	1997-04-08 20:30:37	1997-04-09 05:00:00	0.3	2.2	0	1997-04-08 21:00:00	1997-04-08 21:30:00	1997-04-09 07:00:00	6.4	6.5	6.15	1479.38
74	1997-06-05 12:00:00	1997-06-05 13:30:01	1997-06-05 18:00:00	0.199967	0.7	5.3	1997-06-05 15:00:00	1997-06-06 02:30:00	1997-06-06 05:00:00	9.075	9.6	9.1	10666.2
75	1997-06-08 12:15:00	1997-06-08 16:30:02	1997-06-08 19:00:00	2.69893	5.6	6.9	1997-06-08 16:00:00	1997-06-08 18:15:00	1997-06-09 12:00:00	9.55	10	9.675	23835.9
76	1997-06-12 15:00:00	1997-06-12 23:30:03	1997-06-13 02:00:00	0.999804	4.1	7.9	1997-06-12 15:00:00	1997-06-14 00:45:00	1997-06-14 05:00:00	9.05	12	11	21206.3
77	1997-10-08 21:00:00	1997-10-09 04:30:02	1997-10-09 09:00:00	0.399936	2.4	0.2	1997-10-09 02:00:00	1997-10-09 08:00:00	1997-10-09 14:00:00	4.925	6.7	4.925	33266.2
78	1997-11-24 20:12:00	1997-11-24 22:30:00	1997-11-25 03:00:00	0.699974	3	0	1997-11-24 21:00:00	1997-11-26 01:00:00	1997-11-26 16:00:00	4	4.7	4.3	34216.7
79	1997-11-25 20:02:43	1997-11-25 22:30:03	1997-11-27 01:00:00	4.7997	28	3	1997-11-25 22:00:00	1997-11-26 04:00:00	1997-11-27 02:00:00	4	5	4	45990
80	1998-01-07 01:00:00	1998-01-07 01:30:00	1998-01-07 05:00:00	0.1	0.4	24.5	1998-01-07 01:15:00	1998-01-08	1998-01-08 11:00:00	3.7	3.7	3.4	5283.41
81	1998-01-08 14:00:00	1998-01-08 14:30:00	1998-01-10 02:00:00	0.3	2.5	6	1998-01-08 16:00:00	1998-01-10 14:00:00	1998-01-10 18:00:00	3.55	4	3.85	3029.4
82	1998-01-13 23:00:00	1998-01-14 00:30:01	1998-01-14 04:00:00	0.319985	0.6	23.3	1998-01-14 02:00:00	1998-01-15	1998-01-15 05:00:00	3.925	6.2	5.4	13110.6
83	1998-01-14 10:00:00	1998-01-14 14:29:58	1998-01-15 21:00:00	0.699965	11.4	23.9	1998-01-14 13:00:00	1998-01-16 20:00:00	1998-01-17 04:00:00	4	27	7.9	337273
84	1998-01-27 02:00:00	1998-01-27 02:30:00	1998-01-27 04:00:00	0.1	0.3	0	1998-01-27 02:00:00	1998-01-27 12:45:00	1998-01-27 15:00:00	4.7	5.4	5	2345.19
85	1998-01-29 02:20:00	1998-01-29 03:29:58	1998-01-29 07:00:00	1.09973	1.8	0.3	1998-01-29 02:35:00	1998-01-29 04:45:00	1998-01-29 10:00:00	5	5.4	4.3	4627.24
86	1998-03-03 04:04:17	1998-03-03 04:34:17	1998-03-03 08:00:00	1.36441	2.8	1.1	1998-03-03 04:19:17	1998-03-03 04:30:00	1998-03-03 09:00:00	4	4	3.7	825
87	1998-03-04 07:20:00	1998-03-04 08:29:58	1998-03-04 09:00:00	0.399966	0.7	2.8	1998-03-04 07:35:00	1998-03-04 10:45:00	1998-03-06 13:00:00	3.7	4.3	4	84863.7
88	1998-03-05 08:00:00	1998-03-05 22:29:58	1998-03-06 09:00:00	1.99941	21.3	3.5	1998-03-05 11:00:00	1998-03-07 08:45:00	1998-03-07 13:00:00	4.3	10	4.3	113670
89	1998-03-12 12:00:00	1998-03-12 16:30:04	1998-03-12 18:00:00	0.1	0.4	1	1998-03-12 12:15:00	1998-03-12 14:30:00	1998-03-13 09:00:00	5	5.4	5.1	21539.3
90	1998-03-21 16:00:00	1998-03-22 09:29:56	1998-03-22 14:00:00	2.19976	12.2	0	1998-03-21 16:00:00	1998-03-22 14:15:00	1998-03-22 17:00:00	7.6	13	11.5	37833.3
91	1998-04-14 02:00:00	1998-04-14 02:30:00	1998-04-14 10:00:00	0.1	0.6	3.2	1998-04-14 02:15:00	1998-04-14 02:30:00	1998-04-14 17:00:00	3.1	3.4	3.175	9217.75
92	1998-05-07 12:00:00	1998-05-07 17:29:59	1998-05-08 04:00:00	0.799988	4.4	37	1998-05-07 12:00:00	1998-05-08 17:30:00	1998-05-09 08:00:00	5.8	11	7	192723
93	1998-06-02 10:00:00	1998-06-02 10:30:00	1998-06-02 13:00:00	0.1	0.4	0.3	1998-06-02 12:00:00	1998-06-02 17:45:00	1998-06-03 01:00:00	6.45	9	6.8	39292.8
94	1998-06-05 04:30:00	1998-06-06 20:30:01	1998-06-07 04:00:00	3.19883	24	0.8	1998-06-05 12:00:00	1998-06-07 01:45:00	1998-06-07 08:00:00	7.35	46	25.25	131288
95	1998-06-08 12:00:00	1998-06-08 17:29:59	1998-06-09	0.499994	3	27.6	1998-06-08 12:00:00	1998-06-08 13:30:00	1998-06-09 06:00:00	14.5	30	8.625	130330
96	1998-06-09 14:30:00	1998-06-09 16:29:58	1998-06-09 20:00:00	1.0999	3	30.6	1998-06-09 18:00:00	1998-06-10 10:15:00	1998-06-10 16:00:00	10.375	19	13.5	42991.6
97	1998-06-10 05:00:00	1998-06-11 04:29:57	1998-06-11 18:00:00	1.1996	19.2	33.6	1998-06-10 05:00:00	1998-06-12 17:30:00	1998-06-12 19:00:00	6.55	37	18.25	322206
98	1998-06-12 04:00:00	1998-06-12 18:30:04	1998-06-12 23:00:00	1.89858	8.5	28.7	1998-06-12 05:00:00	1998-06-13 20:45:00	1998-06-14 02:00:00	13	40	17.5	550868
99	1998-09-07 15:00:00	1998-09-07 16:30:07	1998-09-07 19:00:00	0.2	0.7	25.4	1998-09-07 18:00:00	1998-09-08 04:00:00	1998-09-08 13:00:00	3.4	4.3	3.4	36720
100	1998-09-23 07:00:00	1998-09-23 19:30:02	1998-09-24 04:00:00	1.39963	8.3	0	1998-09-23 17:00:00	1998-09-23 22:15:00	1998-09-24 07:00:00	3.775	12	5	120063
101	1998-10-24 08:30:00	1998-10-24 15:29:58	1998-10-24 20:00:00	0.799964	5.5	1.4	1998-10-24 12:00:00	1998-10-24 14:15:00	1998-10-24 23:00:00	4.7	7.1	4.7	35640
102	1998-10-25 02:00:00	1998-10-25 03:49:57	1998-10-25 10:00:00	0.266583	1.4	6.9	1998-10-25 11:00:00	1998-10-25 12:15:00	1998-10-25 14:00:00	4.7	5.4	4.7	630
103	1998-10-28 04:20:00	1998-10-28 21:28:05	1998-10-29 04:00:00	0.3	7.2	8.3	1998-10-28 08:00:00	1998-10-28 09:15:00	1998-10-29 08:00:00	4.5	5.8	4.075	14729.1
104	1998-10-29 10:15:00	1998-10-29 12:30:00	1998-10-29 16:00:00	0.999968	4.3	15.5	1998-10-29 11:00:00	1998-10-29 13:00:00	1998-10-29 19:00:00	4.5	5.8	4.7	7233.75
105	1998-10-31 17:00:00	1998-11-01 03:30:05	1998-11-01 07:00:00	4.29391	7.2	13.6	1998-10-31 22:00:00	1998-11-01 06:15:00	1998-11-01 10:00:00	4.3	9.6	7.1	31725
106	1999-02-04 16:00:00	1999-02-04 16:30:00	1999-02-04 19:00:00	0.1	0.4	0	1999-02-04 23:00:00	1999-02-05 15:15:00	1999-02-05 19:00:00	4.525	13	4.925	58342.5
107	1999-02-13 05:00:00	1999-02-13 19:29:58	1999-02-14 04:00:00	0.299922	2.6	0	1999-02-13 05:00:00	1999-02-14 13:15:00	1999-02-14 17:00:00	4.775	7.6	5.1	8602.34
108	1999-02-16 18:00:00	1999-02-17 04:40:01	1999-02-17 09:00:00	0.566608	2.7	2.9	1999-02-16 19:00:00	1999-02-17 03:00:00	1999-02-17 11:00:00	4.225	18	5	125330
109	1999-02-25 01:30:00	1999-02-25 03:29:58	1999-02-25 18:00:00	3.99915	8.6	12.7	1999-02-25 01:45:00	1999-02-25 01:45:00	1999-02-25 20:00:00	4.7	4.7	4.3	10518.9
110	1999-02-28 16:20:00	1999-02-28 18:50:26	1999-03-01 04:00:00	0.6	3.4	8.6	1999-02-28 18:00:00	1999-02-28 22:15:00	1999-03-01 06:00:00	5.3	9.6	7.225	44104.2
111	1999-06-02 08:00:00	1999-06-03 01:59:59	1999-06-04 11:00:00	0.5	7	0	1999-06-02 08:00:00	1999-06-02 08:15:00	1999-06-04 13:00:00	12	12	10.75	6025.12
112	1999-08-05 21:00:00	1999-08-06 10:30:03	1999-08-06 17:00:00	0.999238	5.2	0.9	1999-08-05 22:00:00	1999-08-06 12:45:00	1999-08-06 18:00:00	4.7	5.8	4.925	15647.1
113	1999-08-06 23:30:00	1999-08-07 00:29:57	1999-08-07 06:00:00	1.19933	1.6	5.2	1999-08-06 23:45:00	1999-08-07 02:00:00	1999-08-07 09:00:00	5	5.4	4.675	4382.33
114	1999-08-09 16:00:00	1999-08-09 16:30:00	1999-08-09 18:00:00	0.1	0.3	6.8	1999-08-09 16:00:00	1999-08-10 06:30:00	1999-08-11 16:00:00	4	7.1	4.3	148577
115	1999-08-22 15:20:00	1999-08-22 16:29:58	1999-08-22 17:00:00	0.699866	1	0	1999-08-22 17:00:00	1999-08-22 19:45:00	1999-08-23 12:00:00	3.25	4.7	3.475	39543.8
116	1999-10-27 19:00:00	1999-10-28 00:29:53	1999-10-28 08:00:00	1.69914	7.6	0.4	1999-10-27 19:00:00	1999-10-28 03:15:00	1999-10-28 10:00:00	5	19	6.2	146754
117	1999-10-28 20:00:00	1999-10-29 02:46:09	1999-10-29 04:00:00	0.8	4.4	8	1999-10-28 22:00:00	1999-10-29 10:30:00	1999-10-29 12:00:00	4.75	6.2	4.5	21578.3
118	1999-11-16 19:00:00	1999-11-16 20:30:01	1999-11-17	1.49997	5.4	0	1999-11-16 22:00:00	1999-11-16 23:15:00	1999-11-17 02:00:00	4.5	5	3.4	5118.75
119	2000-01-16 02:03:31	2000-01-16 03:29:55	2000-01-16 14:00:00	2.19941	12.6	33.2	2000-01-16 04:00:00	2000-01-16 05:00:00	2000-01-16 17:00:00	3.4	4	3.4	13500
120	2000-01-17 02:00:00	2000-01-18 06:30:03	2000-01-18 20:00:00	2.19964	25.4	45.8	2000-01-17 12:00:00	2000-01-18 10:00:00	2000-01-18 23:00:00	3.325	4.7	3.7	46119.4
121	2000-01-19 10:00:00	2000-01-19 11:30:01	2000-01-19 18:00:00	0.399901	1.1	49.6	2000-01-19 13:00:00	2000-01-19 20:15:00	2000-01-20 04:00:00	3.4	3.7	3.4	7830
122	2000-01-20	2000-01-20 00:30:00	2000-01-20 03:00:00	0.1	0.4	50.6	2000-01-20 00:15:00	2000-01-20 00:15:00	2000-01-20 04:00:00	3.7	3.7	3.4	1404
123	2000-01-20 12:00:00	2000-01-20 12:30:00	2000-01-20 17:00:00	0.1	0.6	51	2000-01-20 12:15:00	2000-01-20 16:15:00	2000-01-20 19:00:00	3.4	3.7	3.4	1080
124	2000-01-23 04:10:00	2000-01-24 05:30:04	2000-01-26	2.69988	82.8	2.1	2000-01-23 14:00:00	2000-01-24 18:00:00	2000-01-26 01:00:00	3.325	11	5.8	191780
125	2000-01-30 08:00:00	2000-01-30 13:29:53	2000-01-31 04:00:00	1.59874	11.5	0	2000-01-30 08:00:00	2000-01-31 14:30:00	2000-01-31 18:00:00	4.3	10	5	49783.2
126	2000-02-11 15:00:00	2000-02-14 08:30:05	2000-02-14 20:00:00	4.29967	58.5	13	2000-02-12 17:00:00	2000-02-14 11:00:00	2000-02-14 21:00:00	4	25	7.7	287825
127	2000-04-12 17:00:00	2000-04-13 03:29:59	2000-04-14 04:00:00	2.69994	8.7	0.1	2000-04-12 17:00:00	2000-04-12 18:00:00	2000-04-14 06:00:00	7.6	8	5	52536.9
128	2000-04-18 11:30:00	2000-04-18 13:29:58	2000-04-18 14:00:00	0.299966	0.7	19.4	2000-04-18 11:45:00	2000-04-19 08:00:00	2000-04-19 10:00:00	4.3	4.7	3.7	5022.81
129	2000-05-06 18:00:00	2000-05-06 18:30:00	2000-05-06 22:00:00	0.1	0.5	0	2000-05-06 18:00:00	2000-05-06 23:45:00	2000-05-07 04:00:00	4.7	6.2	5	21296.3
130	2000-05-07 16:00:00	2000-05-07 20:29:58	2000-05-08 04:00:00	0.599895	3.2	0.5	2000-05-07 22:00:00	2000-05-08 05:15:00	2000-05-08 13:00:00	6.225	9	6.325	55488
131	2000-05-21 12:30:00	2000-05-21 15:29:59	2000-05-21 20:00:00	1.09999	2.9	0	2000-05-21 13:00:00	2000-05-21 17:15:00	2000-05-22 03:00:00	5.3	7.1	6.1	42030
132	2000-05-23 09:00:00	2000-05-23 21:30:02	2000-05-24 04:00:00	2.49957	13.3	2.9	2000-05-23 10:00:00	2000-05-24 01:00:00	2000-05-24 06:00:00	4.7	13	7.1	133956
133	2000-08-02 15:03:09	2000-08-02 15:33:09	2000-08-02 17:00:00	1.84737	2.9	0	2000-08-02 17:00:00	2000-08-03 04:30:00	2000-08-03 13:00:00	1.9	2.6	1.9	33030
134	2000-08-31 22:00:00	2000-08-31 22:30:00	2000-09-01 02:00:00	0.2	0.5	0	2000-08-31 22:00:00	2000-09-02 01:15:00	2000-09-03 10:00:00	3.025	4.7	3.4	130880
135	2000-10-28 12:00:00	2000-10-29 00:29:56	2000-10-29 16:00:00	1.09965	7.2	5.3	2000-10-28 17:00:00	2000-10-29 00:30:00	2000-10-29 17:00:00	3.925	6.2	5	32679.1
136	2000-10-29 23:00:00	2000-10-29 23:30:00	2000-10-30 04:00:00	0.1	0.3	12.5	2000-10-29 23:15:00	2000-10-30	2000-10-30 07:00:00	4.7	5	4.7	1350
137	2000-11-13 17:00:00	2000-11-13 17:30:00	2000-11-14 09:00:00	0.2	1.5	23.7	2000-11-14 12:00:00	2000-11-14 14:30:00	2000-11-14 16:00:00	3.9	4.3	3.9	360
138	2000-11-27 04:01:42	2000-11-27 04:31:42	2000-11-27 06:00:00	3.417	4.1	0	2000-11-27 10:00:00	2000-11-27 16:00:00	2000-11-27 21:00:00	3.9	4.7	4.4	7177.5
139	2000-11-29 05:00:00	2000-11-29 10:29:59	2000-11-29 19:00:00	4.9	23.3	23.6	2000-11-29 09:00:00	2000-11-29 10:45:00	2000-11-29 22:00:00	4.825	7.1	4.3	33432
140	2000-12-12 04:10:00	2000-12-12 04:40:00	2000-12-12 11:00:00	0.533333	1.1	0.1	2000-12-12 04:25:00	2000-12-12 05:00:00	2000-12-12 12:00:00	3.1	3.5	3.1	360
141	2000-12-13 21:00:00	2000-12-13 22:53:03	2000-12-14 11:00:00	0.4	2.3	1.2	2000-12-13 23:00:00	2000-12-14 09:00:00	2000-12-14 21:00:00	3.025	4.3	3.9	23690.7
142	2000-12-14 23:00:00	2000-12-14 23:30:00	2000-12-15 05:00:00	0.1	0.4	3.5	2000-12-14 23:15:00	2000-12-14 23:15:00	2000-12-15 11:00:00	3.9	4.3	3.2	23441.2
143	2001-01-29 06:00:00	2001-01-29 08:28:50	2001-01-29 15:00:00	0.2	1.3	7.2	2001-01-29 19:00:00	2001-01-30 09:15:00	2001-01-30 11:00:00	2.4	2.8	2.4	720
144	2001-03-09 10:00:00	2001-03-09 15:29:59	2001-03-09 20:00:00	0.499998	2.3	11.7	2001-03-09 10:00:00	2001-03-09 23:30:00	2001-03-10 03:00:00	2.5	2.8	2.4	829.853
145	2001-03-25	2001-03-25 00:30:00	2001-03-25 03:00:00	0.1	0.4	1	2001-03-25	2001-03-25 04:45:00	2001-03-25 08:00:00	3.7	4.3	3.5	4263.75
146	2001-04-21 16:01:56	2001-04-21 17:29:56	2001-04-21 19:00:00	5.59714	11.4	23.4	2001-04-21 16:16:56	2001-04-21 17:00:00	2001-04-21 23:00:00	3.1	3.5	2.7	3381.92
147	2001-11-11 04:20:00	2001-11-11 06:29:59	2001-11-11 08:00:00	1.59999	2.8	0	2001-11-11 05:00:00	2001-11-12 05:15:00	2001-11-13 07:00:00	1.75	3.9	3.3	96156.2
148	2001-11-12 13:12:00	2001-11-12 16:30:02	2001-11-13	0.999645	3.6	2.8	2001-11-12 16:00:00	2001-11-13 11:15:00	2001-11-13 12:00:00	4	6.2	4.4	17172
149	2001-11-21 10:00:00	2001-11-22 04:30:03	2001-11-22 20:00:00	5.89721	20.3	3.5	2001-11-21 12:00:00	2001-11-22 05:15:00	2001-11-22 21:00:00	2.325	11	1.4	312649
150	2001-11-23 21:00:00	2001-11-24 08:30:01	2001-11-25 16:00:00	6.79887	48.5	23.8	2001-11-24 07:00:00	2001-11-24 11:15:00	2001-11-25 18:00:00	1.475	16	2.4	273769
151	2001-11-28 16:00:00	2001-11-28 23:30:02	2001-11-29 19:00:00	1.49974	8.6	48.9	2001-11-28 16:00:00	2001-11-29 03:15:00	2001-11-30 05:00:00	2.325	3.1	2.25	29452.3
152	2001-12-13 22:00:00	2001-12-14 02:29:58	2001-12-14 15:00:00	4.09941	19.5	0	2001-12-14 04:00:00	2001-12-14 14:30:00	2001-12-15 05:00:00	2.05	6.2	3.9	120321
153	2001-12-17 03:00:00	2001-12-17 07:29:58	2001-12-17 17:00:00	2.29962	12	19.5	2001-12-17 03:15:00	2001-12-17 06:00:00	2001-12-17 20:00:00	4.3	4.7	2.95	15318.5
154	2001-12-28 10:00:00	2001-12-28 12:30:02	2001-12-29 14:00:00	1.89973	21.4	0.1	2001-12-28 11:00:00	2001-12-30	2001-12-30 05:00:00	3.1	3.9	3.6	5255
155	2001-12-30 14:00:00	2001-12-30 17:30:03	2001-12-31 04:00:00	0.599802	4.8	21.4	2001-12-30 20:00:00	2001-12-30 20:45:00	2001-12-31 06:00:00	3.6	3.9	2.1	2598.75
156	2002-01-02 04:01:45	2002-01-02 05:29:57	2002-01-03 04:00:00	3.79978	20.6	26.2	2002-01-02 04:16:45	2002-01-03	2002-01-03 05:00:00	3.1	3.1	2.4	2061
157	2002-01-05 07:00:00	2002-01-05 21:29:58	2002-01-06 06:00:00	1.09996	7.5	25.4	2002-01-05 10:00:00	2002-01-06 07:45:00	2002-01-06 12:00:00	3.6	5.6	3.9	50091.9
158	2002-01-09 04:20:00	2002-01-09 07:30:01	2002-01-09 11:00:00	0.999935	3.6	7.5	2002-01-09 13:00:00	2002-01-09 15:45:00	2002-01-09 20:00:00	2.775	4.3	3.9	16072.2
159	2002-02-07 15:00:00	2002-02-07 20:29:59	2002-02-08	3.79997	10.5	0	2002-02-07 17:00:00	2002-02-08 16:00:00	2002-02-18 12:00:00	1.5	2.4	1.575	1.77248e+06
160	2002-02-13 14:00:00	2002-02-13 17:29:57	2002-02-14 02:00:00	0.399932	2.4	10.5	2002-02-13 14:00:00	2002-02-13 14:30:00	2002-02-14 06:00:00	4.625	5.6	3.9	2716.17
161	2002-04-29 05:00:00	2002-04-29 07:29:56	2002-04-29 14:00:00	3.99787	8.5	0.5	2002-04-29 07:00:00	2002-04-30 01:15:00	2002-04-30 05:00:00	3.9	4.7	3.6	17234
162	2002-04-30 11:30:00	2002-04-30 12:00:00	2002-04-30 14:00:00	0.2	0.5	9	2002-04-30 11:45:00	2002-04-30 11:45:00	2002-04-30 19:00:00	3.9	3.9	3.8	679.655
163	2002-12-13 04:10:00	2002-12-13 20:30:05	2002-12-14 06:00:00	3.69946	18.4	0	2002-12-13 05:00:00	2002-12-13 21:00:00	2002-12-14 10:00:00	2.4	3.9	2.8	36406.6
164	2002-12-31 01:05:00	2002-12-31 03:29:55	2002-12-31 10:00:00	4.29966	12.8	41.3	2002-12-31 01:20:00	2002-12-31 01:45:00	2002-12-31 12:00:00	2.1	2.8	2.4	12760.7
165	2003-01-21 05:00:00	2003-01-21 05:30:00	2003-01-21 10:00:00	0.1	0.6	0	2003-01-21 12:00:00	2003-01-22 06:45:00	2003-01-22 08:00:00	1.675	4.7	2.35	13712.9
166	2003-01-22 15:30:00	2003-01-22 16:29:57	2003-01-22 19:00:00	0.299933	0.8	0.6	2003-01-22 19:00:00	2003-01-22 23:45:00	2003-01-23 03:00:00	2.7	7.1	3.3	48960
167	2003-01-23 14:00:00	2003-01-23 18:29:58	2003-01-23 23:00:00	1.39958	2.3	1.4	2003-01-23 15:00:00	2003-01-23 20:15:00	2003-01-24 02:00:00	3.025	8.5	5.6	62877.8
168	2003-03-14 04:20:00	2003-03-14 04:50:00	2003-03-14 08:00:00	0.266667	0.7	0	2003-03-14 04:35:00	2003-03-14 04:45:00	2003-03-14 10:00:00	3.5	3.5	3.1	3257.14
169	2003-03-14 19:00:00	2003-03-15 04:29:58	2003-03-15 12:00:00	2.39963	12.8	0.7	2003-03-14 23:00:00	2003-03-15 10:00:00	2003-03-15 15:00:00	3.5	4.7	4.1	9289.69
170	2003-03-23 01:00:00	2003-03-23 07:30:01	2003-03-23 12:00:00	0.599969	3.3	3	2003-03-23 01:15:00	2003-03-23 01:30:00	2003-03-24 06:00:00	3.1	3.5	3.1	24840
171	2003-03-26 05:00:00	2003-03-26 06:30:01	2003-03-26 10:00:00	0.499934	1.3	3.3	2003-03-26 05:00:00	2003-03-26 10:00:00	2003-03-26 12:00:00	3.2	9.5	6.3	12291.4
172	2003-03-26 16:00:00	2003-03-26 16:30:00	2003-03-26 21:00:00	0.1	0.6	4.6	2003-03-26 16:15:00	2003-03-26 16:15:00	2003-03-26 22:00:00	5.6	5.2	4.3	46.9565
173	2003-04-12 10:00:00	2003-04-13 00:30:04	2003-04-14 17:00:00	2.69949	34.7	0	2003-04-12 11:00:00	2003-04-12 18:15:00	2003-04-14 18:00:00	3.8	4.3	4	16895.5
174	2003-05-08 04:30:00	2003-05-08 06:07:26	2003-05-09 04:00:00	0.4	3	3.9	2003-05-08 04:45:00	2003-05-08 04:45:00	2003-05-09 10:00:00	2.8	2.8	2.7	1915
175	2003-06-24 05:00:00	2003-06-25 01:58:09	2003-06-25 04:00:00	0.1	2.3	8.2	2003-06-24 05:15:00	2003-06-24 05:45:00	2003-06-25 05:00:00	4.7	5.2	4.7	7200
176	2003-08-20 12:00:00	2003-08-21 00:30:02	2003-08-21 23:00:00	1.89913	12.4	0	2003-08-20 21:00:00	2003-08-21 19:15:00	2003-08-22 03:00:00	1.9	5.6	2.1	101872
177	2003-10-31 04:30:00	2003-10-31 14:30:02	2003-10-31 23:00:00	0.799874	5.1	0	2003-10-31 07:00:00	2003-10-31 07:30:00	2003-11-01 02:00:00	2	2.1	1.9	1560.79
178	2003-11-03 22:00:00	2003-11-03 23:30:13	2003-11-04 03:00:00	0.5	2.2	7.3	2003-11-03 22:15:00	2003-11-03 22:15:00	2003-11-04 09:00:00	2.1	2.1	1.95	119.302
179	2003-12-05 04:12:00	2003-12-05 05:29:59	2003-12-05 15:00:00	0.799979	3.2	1	2003-12-05 07:00:00	2003-12-05 13:30:00	2003-12-05 21:00:00	2.5	4.7	2.8	37878.8
180	2003-12-09 18:00:00	2003-12-11 01:37:01	2003-12-11 09:00:00	1.7	23.9	31.5	2003-12-09 20:00:00	2003-12-09 21:45:00	2003-12-11 12:00:00	2.8	3.1	2.8	17280
181	2003-12-11 22:00:00	2003-12-12 01:29:57	2003-12-12 02:00:00	0.299819	0.5	52.2	2003-12-12 03:00:00	2003-12-12 03:45:00	2003-12-12 05:00:00	2.5	2.8	2.4	303.75
182	2003-12-20 14:00:00	2003-12-20 22:35:58	2003-12-21 04:00:00	0.5	3.9	0	2003-12-20 14:15:00	2003-12-20 16:00:00	2003-12-21 07:00:00	2.8	3.1	2.4	11408.5
183	2003-12-23 09:00:00	2003-12-23 09:30:00	2003-12-23 19:00:00	0.1	0.8	3.9	2003-12-23 10:00:00	2003-12-24 15:00:00	2003-12-24 17:00:00	3.2	7.6	4.3	42845.8
184	2004-01-20 01:00:00	2004-01-20 04:30:03	2004-01-20 22:00:00	1.6994	5.5	0.1	2004-01-20 04:00:00	2004-01-20 04:15:00	2004-01-21 01:00:00	2.95	3.1	2.1	11931.4
185	2004-01-24 04:30:00	2004-01-24 07:28:59	2004-01-24 10:00:00	0.2	0.9	5.6	2004-01-24 06:00:00	2004-01-24 13:30:00	2004-01-24 15:00:00	2.45	3.1	2.8	4767.5
186	2004-01-24 17:00:00	2004-01-24 17:30:00	2004-01-24 19:00:00	0.2	0.4	6.5	2004-01-24 17:00:00	2004-01-24 17:15:00	2004-01-24 21:00:00	3.025	3.1	2.625	1080
187	2004-02-15 18:00:00	2004-02-16 06:23:25	2004-02-16 19:00:00	1.6	13.2	0	2004-02-16 01:00:00	2004-02-16 16:15:00	2004-02-16 23:00:00	2.8	10	5.05	109861
188	2004-02-22 08:00:00	2004-02-22 13:30:05	2004-02-22 19:00:00	0.2	1.4	13.8	2004-02-22 08:15:00	2004-02-22 08:30:00	2004-02-23 01:00:00	2.8	3.1	2.7	6349.03
189	2004-02-24 05:00:00	2004-02-24 05:30:00	2004-02-24 12:00:00	0.1	0.8	3.4	2004-02-24 08:00:00	2004-02-24 13:15:00	2004-02-24 16:00:00	3.1	3.5	3.1	720
190	2004-05-10 22:00:00	2004-05-11 01:30:03	2004-05-11 04:00:00	1.8997	5.9	0	2004-05-11 01:00:00	2004-05-11 15:00:00	2004-05-11 17:00:00	4.3	6.2	5.2	11877.2
191	2004-05-27 21:15:00	2004-05-28 00:30:01	2004-05-28 06:00:00	0.799853	4.5	0.5	2004-05-28	2004-05-28 05:45:00	2004-05-28 11:00:00	2.45	6.2	5.2	32433.8
192	2004-10-17 11:00:00	2004-10-17 18:24:13	2004-10-17 21:00:00	0.5	2.3	0	2004-10-17 12:00:00	2004-10-17 22:45:00	2004-10-18 07:00:00	1.6	17	1.875	208608
193	2004-10-19 01:00:00	2004-10-20 06:29:58	2004-10-20 16:00:00	4.79968	54.6	2.5	2004-10-19 10:00:00	2004-10-19 12:45:00	2004-10-20 19:00:00	1.75	8.5	2.95	140167
194	2004-11-03 10:00:00	2004-11-03 18:30:03	2004-11-04	0.999901	8.6	0	2004-11-03 14:00:00	2004-11-03 17:30:00	2004-11-04 02:00:00	2.4	2.8	2.175	4658.91
195	2004-11-25 11:30:00	2004-11-25 12:30:03	2004-11-25 17:00:00	3.39868	7.2	0	2004-11-25 11:45:00	2004-11-25 13:45:00	2004-11-25 20:00:00	1.5	1.6	1.55	1059.55
196	2004-11-26 23:00:00	2004-11-27 05:30:01	2004-11-27 14:00:00	6.59936	37.1	7.2	2004-11-27 13:00:00	2004-11-27 14:45:00	2004-11-27 17:00:00	1.65	2.1	1.65	3060
197	2004-12-06 19:00:00	2004-12-07 23:30:03	2004-12-09 02:00:00	2.79955	51.3	0	2004-12-06 20:00:00	2004-12-08 11:45:00	2004-12-09 04:00:00	2.7	5.6	2.95	85259.9
198	2004-12-31 20:00:00	2004-12-31 23:29:57	2005-01-02 01:00:00	0.799931	8.4	61.9	2005-01-02 09:00:00	2005-01-02 22:30:00	2005-01-03	2.7	3.1	2.6	7449
199	2005-01-17 05:00:00	2005-01-18 00:57:43	2005-01-18 04:00:00	0.1	2.4	0	2005-01-17 10:00:00	2005-01-17 17:00:00	2005-01-18 05:00:00	2.7	3.1	2.7	6705
200	2005-02-11 15:00:00	2005-02-11 22:39:15	2005-02-12 04:00:00	0.2	2	1.1	2005-02-11 15:00:00	2005-02-12 14:00:00	2005-02-12 19:00:00	2.7	3.1	2.8	5445
201	2005-02-18 04:15:00	2005-02-18 12:30:01	2005-02-18 16:00:00	0.499859	1.9	9.6	2005-02-18 09:00:00	2005-02-18 19:45:00	2005-02-19 01:00:00	2.5	3.1	2.4	9104.06
202	2005-02-19 14:00:00	2005-02-22 06:29:57	2005-02-23 04:00:00	2.69975	41.6	11.5	2005-02-19 14:00:00	2005-02-21 23:15:00	2005-02-23 06:00:00	2.7	3.9	2.95	66230.9
203	2005-03-19 04:15:00	2005-03-20 12:30:00	2005-03-21 03:00:00	1.39999	24.9	0	2005-03-19 07:00:00	2005-03-19 15:00:00	2005-03-21 06:00:00	2.6	5.2	2.8	102023
204	2005-03-21 18:30:00	2005-03-22 15:29:57	2005-03-23 23:00:00	2.99991	36.9	24.9	2005-03-21 23:00:00	2005-03-22 10:45:00	2005-03-24 01:00:00	3.3	5.2	2.8	134768
205	2005-03-27 19:30:00	2005-03-27 23:30:01	2005-03-28 13:00:00	3.69997	17.7	0	2005-03-27 21:00:00	2005-03-27 21:45:00	2005-03-28 17:00:00	5.65	7.1	4.825	40542.2
206	2005-04-24 14:00:00	2005-04-24 14:30:00	2005-04-24 23:00:00	0.2	0.8	2.6	2005-04-24 16:00:00	2005-04-25 19:30:00	2005-04-25 21:00:00	4.825	5.6	5.2	3860.11
207	2005-05-13 12:00:00	2005-05-13 16:29:58	2005-05-13 18:00:00	0.59986	1.4	22.9	2005-05-13 15:00:00	2005-05-13 20:15:00	2005-05-14	4.4	6.7	4.2	31845
208	2005-05-15 15:00:00	2005-05-16 06:30:05	2005-05-16 22:00:00	1.89838	10.1	1.8	2005-05-15 15:00:00	2005-05-16 09:15:00	2005-05-16 23:00:00	6.8	13	7	280758
209	2005-05-18 11:00:00	2005-05-18 22:37:55	2005-05-19 04:00:00	0.4	3.9	11.9	2005-05-18 11:00:00	2005-05-19 18:45:00	2005-05-19 21:00:00	8.625	18	14.5	89527.7
210	2005-06-08 03:00:00	2005-06-08 14:36:55	2005-06-08 20:00:00	0.4	4.3	1	2005-06-08 05:00:00	2005-06-08 21:00:00	2005-06-09 01:00:00	8.375	11	9.375	48465
211	2005-06-09 11:00:00	2005-06-09 13:58:59	2005-06-09 16:00:00	0.2	1	5.3	2005-06-09 11:00:00	2005-06-09 11:15:00	2005-06-09 17:00:00	8.875	9.5	8.5	3023.44
212	2005-11-28 06:00:00	2005-11-28 11:29:59	2005-11-30	1.9	16.4	11.6	2005-11-28 22:00:00	2005-11-29 19:30:00	2005-11-30 02:00:00	3	3.9	3.45	19781.1
213	2005-11-30 16:20:00	2005-12-01 23:29:58	2005-12-02 04:00:00	18.0993	112.1	28	2005-11-30 17:00:00	2005-12-01 22:30:00	2005-12-02 11:00:00	3.3	16	6.7	455781
214	2005-12-21 14:12:00	2005-12-21 17:29:56	2005-12-23 02:00:00	6.39788	63.9	82.2	2005-12-21 16:00:00	2005-12-21 19:45:00	2005-12-23 03:00:00	5.15	46	20.5	704582
215	2005-12-25 17:00:00	2005-12-26 05:30:02	2005-12-28 22:00:00	5.09907	46	68.4	2005-12-25 20:00:00	2005-12-28 12:45:00	2005-12-28 23:00:00	6.7	14	8.05	298125
216	2005-12-29 21:00:00	2005-12-30 18:29:54	2005-12-31 18:00:00	8.0964	106.9	46	2005-12-29 21:00:00	2005-12-31 11:00:00	2005-12-31 19:00:00	6.775	124	72.75	696283
217	2006-01-27 05:00:00	2006-01-27 05:30:00	2006-01-27 09:00:00	0.1	0.5	0	2006-01-27 05:15:00	2006-01-27 06:30:00	2006-01-27 10:00:00	7	7.3	7.15	1520.53
218	2006-01-30 08:00:00	2006-01-30 16:30:03	2006-01-30 22:00:00	3.19931	10	1.7	2006-01-30 11:00:00	2006-01-30 16:15:00	2006-01-31 03:00:00	8.5	9.9	8.2	32307.2
219	2006-02-01 14:00:00	2006-02-01 22:34:52	2006-02-02 20:00:00	1.4	7.3	11.7	2006-02-01 14:00:00	2006-02-02 13:45:00	2006-02-03 01:00:00	8.125	10	9.125	61291.6
220	2006-02-14 23:00:00	2006-02-15 04:29:59	2006-02-15 18:00:00	0.599996	3.9	0	2006-02-15	2006-02-16 06:30:00	2006-02-16 08:00:00	7.3	15	9.225	9608.38
221	2006-02-26 13:30:00	2006-02-27 19:29:55	2006-02-28 23:00:00	5.09701	110.6	0	2006-02-26 18:00:00	2006-02-27 17:15:00	2006-03-01 02:00:00	7.15	20	7.75	644418
222	2006-03-28 13:12:00	2006-03-28 20:30:00	2006-03-29	2.69976	10.2	32.6	2006-03-28 14:00:00	2006-03-28 23:00:00	2006-03-29 01:00:00	5.425	6.4	5.6	9021.99
223	2006-03-29 06:30:00	2006-03-29 08:30:04	2006-03-29 18:00:00	0.999864	5.7	42.8	2006-03-29 06:45:00	2006-03-29 09:30:00	2006-03-29 21:00:00	5.6	5.8	5.3	7569.47
224	2006-03-31 05:00:00	2006-03-31 05:30:00	2006-03-31 10:00:00	0.1	0.6	16	2006-03-31 05:00:00	2006-03-31 21:30:00	2006-04-01 02:00:00	5.6	6.1	5.25	12753.8
225	2006-04-01 10:00:00	2006-04-01 14:24:10	2006-04-01 17:00:00	1.5	7.5	21	2006-04-01 11:00:00	2006-04-01 21:15:00	2006-04-01 23:00:00	5.75	7	6.025	3216.09
226	2006-04-02 07:00:00	2006-04-03 05:29:56	2006-04-05 16:00:00	1.49989	22.8	28.5	2006-04-02 16:00:00	2006-04-04 17:15:00	2006-04-05 22:00:00	6.025	13	7.375	463690
227	2006-05-21 12:00:00	2006-05-21 20:50:29	2006-05-21 22:00:00	0.2	1.3	0.2	2006-05-21 15:00:00	2006-05-21 15:45:00	2006-05-22	20.75	23	18.75	17600
228	2006-11-02 05:00:00	2006-11-02 13:30:03	2006-11-02 22:00:00	0.699903	4.9	0	2006-11-02 05:00:00	2006-11-03 15:30:00	2006-11-04 01:00:00	4.5	9.2	4.8	126303
229	2006-11-08 07:20:00	2006-11-08 07:50:00	2006-11-08 16:00:00	0.266667	0.9	7.2	2006-11-08 08:00:00	2006-11-08 08:45:00	2006-11-08 22:00:00	4.45	4.6	4.1	6676.88
230	2006-11-11 04:00:00	2006-11-11 12:30:03	2006-11-11 18:00:00	0.399806	1.6	0.9	2006-11-11 05:00:00	2006-11-12 13:00:00	2006-11-12 17:00:00	4.125	4.6	4.4	6439.69
231	2006-11-13 09:00:00	2006-11-13 20:30:01	2006-11-14 04:00:00	0.599942	4.9	5.9	2006-11-13 11:00:00	2006-11-13 21:15:00	2006-11-14 10:00:00	4.75	7	4.95	83658.9
232	2006-12-13 10:00:00	2006-12-13 10:30:00	2006-12-13 16:00:00	0.1	0.6	3.1	2006-12-13 12:00:00	2006-12-13 16:00:00	2006-12-13 17:00:00	4.4	4.6	4.45	144
233	2006-12-26 18:30:00	2006-12-27 12:29:53	2006-12-27 16:00:00	2.49846	10.8	15.2	2006-12-26 19:00:00	2006-12-28 09:15:00	2006-12-28 11:00:00	4.4	5.6	4.3	15609.9
234	2007-02-07 14:00:00	2007-02-07 14:30:00	2007-02-08 01:00:00	0.1	1	0	2007-02-08 02:00:00	2007-02-08 22:30:00	2007-02-09 01:00:00	3.7	4.4	4.1	1436.09
235	2007-02-08 17:00:00	2007-02-10 04:29:53	2007-02-11 22:00:00	3.29561	41.7	1	2007-02-08 21:00:00	2007-02-10 22:00:00	2007-02-12	3.9	14	3.85	209070
236	2007-02-22 07:30:00	2007-02-22 09:30:04	2007-02-23 04:00:00	1.39986	7.9	1	2007-02-22 10:00:00	2007-02-24 03:45:00	2007-02-24 11:00:00	3.6	5.1	3.45	76638.7
237	2007-04-11 19:00:00	2007-04-12 02:29:56	2007-04-12 04:00:00	0.499897	2.2	2.8	2007-04-11 23:00:00	2007-04-12 11:00:00	2007-04-12 16:00:00	4.75	5.3	5.1	4169.78
238	2007-09-19 19:30:00	2007-09-20 00:30:02	2007-09-20 04:00:00	3.19922	11.7	0	2007-09-19 22:00:00	2007-09-20 11:00:00	2007-09-20 18:00:00	2.25	2.9	2.325	14335.3
239	2007-10-19 19:12:00	2007-10-19 20:29:59	2007-10-20 02:00:00	1.09996	3.4	1.7	2007-10-19 23:00:00	2007-10-20 05:45:00	2007-10-20 08:00:00	2.8625	5.85	3.3625	24177
240	2007-11-10 18:00:00	2007-11-11 06:29:56	2007-11-11 10:00:00	1.19947	7.7	0	2007-11-10 19:00:00	2007-11-11 04:00:00	2007-11-11 11:00:00	2.42	3.93	3.12	26793.3
241	2008-03-12 17:00:00	2008-03-13 00:30:02	2008-03-14 02:00:00	2.69904	13.1	0	2008-03-12 18:00:00	2008-03-13 06:00:00	2008-03-14 03:00:00	3.82	6.97	4.6	99083.9
242	2008-04-23 04:20:00	2008-04-23 05:50:37	2008-04-23 09:00:00	0.3	1.2	0	2008-04-23 04:35:00	2008-04-23 05:15:00	2008-04-23 10:00:00	4.14	4.37	4.14	621
243	2008-04-23 19:00:00	2008-04-23 19:30:00	2008-04-23 21:00:00	0.1	0.3	1.2	2008-04-23 20:00:00	2008-04-23 20:15:00	2008-04-24	4.3125	4.37	3.93	1151.44
244	2008-05-20 19:20:00	2008-05-20 20:29:58	2008-05-20 22:00:00	2.49926	3.4	0	2008-05-20 21:00:00	2008-05-20 23:45:00	2008-05-21 09:00:00	4.8925	7.57	4.4325	28036.1
245	2008-10-03 13:30:00	2008-10-03 18:29:56	2008-10-04 04:00:00	4.39696	18.7	0	2008-10-03 21:00:00	2008-10-04 05:00:00	2008-10-04 12:00:00	1.96	3.51	2.185	34174.1
246	2008-11-01 04:12:00	2008-11-01 21:30:00	2008-11-02 21:00:00	1.4998	18.7	0	2008-11-01 05:00:00	2008-11-02 01:15:00	2008-11-03	2.185	6.68	2.895	145053
247	2009-01-02 01:00:00	2009-01-02 13:05:05	2009-01-02 20:00:00	1.2	8.9	0	2009-01-02 03:00:00	2009-01-02 06:00:00	2009-01-02 21:00:00	3.12	3.71	2.94	19451.2
248	2009-01-22 04:06:00	2009-01-22 09:29:59	2009-01-25 18:00:00	2.69989	55.2	0	2009-01-22 07:00:00	2009-01-22 14:00:00	2009-01-25 20:00:00	2.895	4.14	2.94	141710
249	2009-02-17 01:00:00	2009-02-17 18:44:33	2009-02-18 02:00:00	0.3	4.1	8.5	2009-02-17 08:00:00	2009-02-18 12:45:00	2009-02-18 19:00:00	2.5475	2.76	2.59	5578.49
250	2009-02-22 05:20:00	2009-02-23 02:29:58	2009-02-23 21:00:00	0.699917	7.8	4.2	2009-02-22 06:00:00	2009-02-23 14:45:00	2009-02-23 22:00:00	3.12	4.14	3.61	38181.5
251	2009-02-26 05:00:00	2009-02-26 05:30:00	2009-02-26 07:00:00	0.1	0.3	7.8	2009-02-26 05:15:00	2009-02-26 05:30:00	2009-02-26 08:00:00	3.12	3.31	3.12	171
252	2009-03-01 10:00:00	2009-03-04 04:30:00	2009-03-04 08:00:00	5.79984	63.5	0.3	2009-03-01 17:00:00	2009-03-02 17:15:00	2009-03-04 09:00:00	3.51	12.1	4.6	389727
253	2009-04-24 05:00:00	2009-04-24 09:12:38	2009-04-24 12:00:00	0.3	1.6	0	2009-04-24 11:00:00	2009-04-24 12:15:00	2009-04-24 15:00:00	5.715	6.12	5.7825	2912.2
254	2009-05-03 05:04:17	2009-05-03 06:29:59	2009-05-03 16:00:00	2.79987	15.9	10.2	2009-05-03 06:00:00	2009-05-03 10:45:00	2009-05-03 21:00:00	6.1875	8.87	5.985	74036.5
255	2009-05-04 12:00:00	2009-05-04 22:29:59	2009-05-05 14:00:00	1.69998	7.3	26.1	2009-05-04 14:00:00	2009-05-05 00:30:00	2009-05-06 02:00:00	4.4275	6.97	5.08	136567
256	2009-06-01 12:00:00	2009-06-01 15:29:57	2009-06-01 18:00:00	0.499796	1.6	0	2009-06-01 17:00:00	2009-06-01 19:30:00	2009-06-01 23:00:00	2.1475	2.59	2.26	4715.16
257	2009-06-02 09:00:00	2009-06-02 13:29:58	2009-06-03 19:00:00	1.19965	4.7	1.6	2009-06-02 15:00:00	2009-06-03 17:00:00	2009-06-03 21:00:00	2.185	4.14	3.31	7493.06
258	2009-06-04 18:00:00	2009-06-04 21:30:03	2009-06-05 01:00:00	0.399901	1.4	6.5	2009-06-04 19:00:00	2009-06-05 04:00:00	2009-06-05 06:00:00	2.94	3.31	3.12	2490.55
259	2010-01-09 17:00:00	2010-01-09 19:30:02	2010-01-09 22:00:00	0.999538	2	1.9	2010-01-09 17:15:00	2010-01-09 17:45:00	2010-01-09 23:00:00	2.15	2.27	2.15	108
260	2010-01-12 07:00:00	2010-01-13 04:30:00	2010-01-13 16:00:00	8.69816	27.4	3.9	2010-01-12 07:00:00	2010-01-13 04:30:00	2010-01-13 17:00:00	2.4125	3.42	2.75	25992.4
261	2010-02-23 10:00:00	2010-02-23 23:29:57	2010-02-24 17:00:00	2.29993	22.1	6.9	2010-02-24 03:00:00	2010-02-24 09:30:00	2010-02-24 22:00:00	2.7175	3.28	2.62	17617.5
262	2010-02-26 13:00:00	2010-02-26 22:29:58	2010-02-27 17:00:00	4.09997	35	22.1	2010-02-26 15:00:00	2010-02-26 18:45:00	2010-02-27 19:00:00	2.7175	3.57	2.905	19077.6
263	2010-03-25 17:00:00	2010-03-25 17:30:00	2010-03-26	0.2	1	1.8	2010-03-25 17:15:00	2010-03-25 17:15:00	2010-03-26 03:00:00	2.38	2.38	2.27	1172.77
264	2010-03-29 21:00:00	2010-03-30 01:29:58	2010-03-31 11:00:00	1.19986	18.8	2.8	2010-03-29 22:00:00	2010-03-30 17:00:00	2010-03-31 13:00:00	3.1425	3.72	2.75	22058.7
265	2010-04-02 13:08:34	2010-04-02 14:29:58	2010-04-03 01:00:00	1.49959	4.2	18.8	2010-04-02 14:00:00	2010-04-02 14:30:00	2010-04-03 06:00:00	3.075	3.14	2.75	2944.05
266	2010-04-04 12:00:00	2010-04-04 23:30:01	2010-04-06 01:00:00	1.19994	12.1	23	2010-04-06 16:00:00	2010-04-06 16:15:00	2010-04-06 21:00:00	2.975	3.01	2.87	1174.95
267	2010-04-12 16:00:00	2010-04-12 16:30:00	2010-04-12 18:00:00	0.1	0.3	1.5	2010-04-12 16:15:00	2010-04-12 16:30:00	2010-04-12 21:00:00	2.87	3.01	2.87	378
268	2010-04-21 04:30:00	2010-04-22 05:30:02	2010-04-22 20:00:00	7.9967	28.8	0.8	2010-04-21 22:00:00	2010-04-23 16:00:00	2010-04-23 18:00:00	3.4575	4.19	3.72	3494.76
269	2010-05-10 07:00:00	2010-05-10 14:30:02	2010-05-11 04:00:00	1.09981	5.6	0	2010-05-10 13:00:00	2010-05-10 17:30:00	2010-05-11 07:00:00	3.7975	4.19	3.495	3753.34
270	2010-05-17 05:00:00	2010-05-17 12:30:02	2010-05-17 15:00:00	0.1	0.9	0	2010-05-17 14:00:00	2010-05-17 17:15:00	2010-05-17 23:00:00	4.995	5.41	4.905	5692.5
271	2010-05-19 18:30:00	2010-05-19 20:58:50	2010-05-20	0.2	1	0.9	2010-05-19 19:00:00	2010-05-20 19:00:00	2010-05-20 21:00:00	6.295	6.61	5.8425	3841.53
272	2010-06-03 01:00:00	2010-06-03 01:30:00	2010-06-03 03:00:00	0.1	0.3	0.3	2010-06-03 07:00:00	2010-06-03 17:45:00	2010-06-03 20:00:00	4.775	5.79	5.085	10149.2
273	2010-10-02 15:30:00	2010-10-02 16:00:00	2010-10-02 18:00:00	0.2	0.5	0	2010-10-02 20:00:00	2010-10-03 17:15:00	2010-10-03 18:00:00	2.2975	2.75	2.62	2563.64
274	2010-10-03 03:00:00	2010-10-03 11:31:33	2010-10-03 15:00:00	2.4	8.2	0.5	2010-10-04 05:00:00	2010-10-04 08:00:00	2010-10-04 15:00:00	3.1075	4.35	2.685	16801.9
275	2010-10-03 21:00:00	2010-10-05 16:30:39	2010-10-06 07:00:00	9.56691	75	8.7	2010-10-04 05:00:00	2010-10-05 00:45:00	2010-10-06 09:00:00	3.1075	6.19	3.175	128095
276	2010-10-22 20:10:00	2010-10-24 16:30:02	2010-10-25 04:00:00	5.39993	59.6	12.2	2010-10-23	2010-10-24 20:15:00	2010-10-25 11:00:00	2.685	11.4	3.6075	230745
277	2010-12-05 16:30:00	2010-12-05 18:29:58	2010-12-06 11:00:00	2.49956	16.7	9.2	2010-12-05 22:00:00	2010-12-05 23:15:00	2010-12-06 12:00:00	2.56	2.75	2.5	1297.29
278	2010-12-08 16:00:00	2010-12-08 17:43:26	2010-12-09 04:00:00	0.3	1.8	16.9	2010-12-08 16:15:00	2010-12-09 13:30:00	2010-12-09 15:00:00	2.75	3.14	3.01	1150.71
279	2010-12-10 04:30:00	2010-12-10 06:29:58	2010-12-10 19:00:00	0.399966	1.8	18.7	2010-12-10 06:00:00	2010-12-10 12:30:00	2010-12-10 20:00:00	2.975	3.57	3.28	11148.8
280	2010-12-17 04:02:51	2010-12-18 23:29:59	2010-12-20 04:00:00	7.29988	163.5	41.1	2010-12-18	2010-12-19 06:15:00	2010-12-20 06:00:00	3.6825	8.18	4.69	273639
281	2011-01-13 11:20:00	2011-01-13 11:50:00	2011-01-13 17:00:00	0.266667	0.9	0	2011-01-13 14:00:00	2011-01-13 15:15:00	2011-01-13 20:00:00	3.315	3.57	3.28	2380.13
282	2011-03-10 13:05:00	2011-03-10 14:30:00	2011-03-10 21:00:00	5.79956	10.7	42.1	2011-03-10 15:00:00	2011-03-10 17:30:00	2011-03-11 02:00:00	4.7325	5.22	4.4775	7742.35
283	2011-03-13 08:30:00	2011-03-14 02:30:05	2011-03-14 07:00:00	9.49344	57.9	12.3	2011-03-13 14:00:00	2011-03-14 05:30:00	2011-03-14 10:00:00	4.31	8.92	5.315	55358.8
284	2011-03-14 15:04:17	2011-03-14 17:30:00	2011-03-14 19:00:00	5.29909	10.3	68.6	2011-03-14 15:19:17	2011-03-14 15:30:00	2011-03-15	5.22	5.6	4.52	8331.88
285	2011-03-15 13:00:00	2011-03-15 18:29:59	2011-03-16 17:00:00	5.59995	68	78.9	2011-03-15 13:00:00	2011-03-16 02:00:00	2011-03-16 19:00:00	3.645	21.2	9.44	499754
286	2011-03-24 06:00:00	2011-03-24 17:30:01	2011-03-27 06:00:00	1.19994	28.1	97.5	2011-03-24 14:00:00	2011-03-24 15:30:00	2011-03-27 09:00:00	4.905	5.22	4.4775	15070.1
287	2011-03-27 14:30:00	2011-03-27 20:30:03	2011-03-28 04:00:00	1.39941	10.1	41.2	2011-03-27 20:00:00	2011-03-28 18:15:00	2011-03-28 23:00:00	4.905	5.6	5.04	5941.12
288	2011-04-13 11:30:00	2011-04-13 15:30:01	2011-04-13 17:00:00	0.199968	0.8	0.8	2011-04-13 13:00:00	2011-04-13 15:00:00	2011-04-13 22:00:00	6.0925	6.61	5.6475	2023.25
289	2011-06-04 06:00:00	2011-06-05 23:30:00	2011-06-06 12:00:00	5.79973	53.5	0	2011-06-04 10:00:00	2011-06-06 02:45:00	2011-06-06 15:00:00	7.595	20.8	11.6	190631
290	2011-10-04 19:20:00	2011-10-05 01:29:58	2011-10-05 06:00:00	2.29975	11.4	0.5	2011-10-05 02:00:00	2011-10-06 05:45:00	2011-10-06 12:00:00	5.6025	7.71	5.845	59766
291	2011-10-05 14:00:00	2011-10-05 15:30:01	2011-10-06 11:00:00	0.599868	3.8	11.9	2011-10-05 16:00:00	2011-10-06 13:15:00	2011-10-06 19:00:00	6.115	12.2	5.8425	60328.8
292	2012-01-20 01:20:00	2012-01-20 23:29:59	2012-01-21 13:00:00	12	82.4	0	2012-01-20 05:00:00	2012-01-21 01:00:00	2012-01-21 17:00:00	4.03	26.6	4.35	393006
293	2012-01-22 08:15:00	2012-01-23 02:30:01	2012-01-23 16:00:00	3.29979	40.2	82.4	2012-01-22 17:00:00	2012-01-23 06:00:00	2012-01-23 23:00:00	3.795	4.86	3.6825	37666.7
294	2012-02-27 01:20:00	2012-02-27 09:30:01	2012-02-27 19:00:00	1.39994	11.5	0	2012-02-27 07:00:00	2012-02-27 07:15:00	2012-02-28 01:00:00	3.645	3.87	3.0775	9431.59
295	2012-03-06 01:12:00	2012-03-06 07:29:59	2012-03-06 13:00:00	0.699964	3.7	0	2012-03-06 05:00:00	2012-03-07 08:45:00	2012-03-07 18:00:00	3.2475	8.67	3.0075	149032
296	2012-03-13 20:00:00	2012-03-16 19:29:54	2012-03-17 01:00:00	5.8971	69.2	0	2012-03-14 02:00:00	2012-03-16 22:00:00	2012-03-17 06:00:00	3.11	8.67	5.27	193631
297	2012-03-17 07:00:00	2012-03-17 11:51:01	2012-03-17 20:00:00	1	8.2	69.2	2012-03-17 07:00:00	2012-03-17 08:15:00	2012-03-17 23:00:00	5.5525	7.48	4.95	10147.9
298	2012-03-18 03:00:00	2012-03-18 15:30:02	2012-03-18 23:00:00	0.699938	6.7	77.4	2012-03-18 07:00:00	2012-03-18 07:45:00	2012-03-19 01:00:00	4.9525	5.22	4.23	722.062
299	2012-03-27 18:00:00	2012-03-28 01:30:02	2012-03-29	6.29744	16.2	4.1	2012-03-28 05:00:00	2012-03-28 12:45:00	2012-03-29 02:00:00	4.3925	4.69	4.27	8113.69
300	2012-04-14 10:15:00	2012-04-14 11:29:59	2012-04-14 12:00:00	0.499983	0.9	7.2	2012-04-14 10:30:00	2012-04-14 11:15:00	2012-04-14 20:00:00	4.19	4.35	4.19	2880
301	2012-10-23 22:30:00	2012-10-24 00:29:58	2012-10-24 13:00:00	0.299966	1.9	16.1	2012-10-23 22:45:00	2012-10-24 09:30:00	2012-10-24 18:00:00	2.27	2.38	2.2975	1919.25
302	2012-11-28 04:20:00	2012-11-28 07:30:01	2012-11-28 13:00:00	2.69935	6.9	0	2012-11-28 14:00:00	2012-11-28 17:30:00	2012-11-28 21:00:00	2.685	2.87	2.5	3159.8
303	2012-11-28 19:00:00	2012-11-28 19:30:00	2012-11-28 22:00:00	0.1	0.4	6.9	2012-11-28 19:15:00	2012-11-28 19:15:00	2012-11-28 23:00:00	2.75	2.75	2.5	0
304	2012-11-29 18:20:00	2012-11-29 23:31:09	2012-11-30 16:00:00	7.4	72.8	7.3	2012-11-30 03:00:00	2012-11-30 13:45:00	2012-11-30 21:00:00	2.6525	7.26	3.91	93598.8
305	2012-12-01 04:00:00	2012-12-02 06:30:00	2012-12-02 16:00:00	8.29916	56.6	80.1	2012-12-01 19:00:00	2012-12-02 11:15:00	2012-12-02 19:00:00	3.075	20	8.245	279564
306	2012-12-04 08:00:00	2012-12-04 21:29:57	2012-12-05 16:00:00	6.09961	40.4	129.8	2012-12-04 12:00:00	2012-12-05 11:15:00	2012-12-05 18:00:00	4.735	15.5	8.125	195707
307	2012-12-13 03:02:00	2012-12-13 03:32:00	2012-12-13 10:00:00	2.90066	6	14.3	2012-12-13 03:17:00	2012-12-13 03:45:00	2012-12-13 13:00:00	3.42	4.19	3.42	1773
308	2012-12-14 12:00:00	2012-12-14 13:30:01	2012-12-14 16:00:00	1.89944	2.4	20.3	2012-12-15 01:00:00	2012-12-15 01:30:00	2012-12-15 03:00:00	3.28	3.42	3.21	267.75
309	2012-12-15 07:30:00	2012-12-15 12:29:56	2012-12-15 14:00:00	0.699695	1.8	22.7	2012-12-15 12:00:00	2012-12-16 02:45:00	2012-12-16 03:00:00	3.35	3.72	3.245	2712.38
310	2012-12-16 03:00:00	2012-12-17 22:30:02	2012-12-18 14:00:00	1.89908	23.4	24.5	2012-12-16 19:00:00	2012-12-17 08:30:00	2012-12-18 21:00:00	3.495	4.86	3.21	56397.9
311	2013-03-31 17:00:00	2013-03-31 21:30:04	2013-03-31 23:00:00	1.39986	3.8	3.6	2013-04-01	2013-04-01 01:30:00	2013-04-01 05:00:00	4.11	4.52	3.91	1503
312	2013-05-04 18:15:00	2013-05-04 18:45:18	2013-05-04 21:00:00	0.4	1	0.3	2013-05-04 18:30:00	2013-05-05 05:15:00	2013-05-05 09:00:00	4.03	4.35	4.15	3411.93
313	2013-05-05 04:20:00	2013-05-05 10:29:58	2013-05-05 11:00:00	0.599893	1.4	1.3	2013-05-06 06:00:00	2013-05-06 07:00:00	2013-05-06 11:00:00	4.35	4.52	4.19	1366.2
314	2013-05-05 17:00:00	2013-05-07 13:30:04	2013-05-07 21:00:00	3.69938	36.8	2.7	2013-05-06 06:00:00	2013-05-06 23:00:00	2013-05-07 23:00:00	4.35	5.79	4.8175	16287.5
315	2014-02-05 21:15:00	2014-02-05 23:00:51	2014-02-06 12:00:00	0.4	2.4	0.9	2014-02-05 21:30:00	2014-02-06 15:00:00	2014-02-06 16:00:00	3.01	3.28	3.14	306.243
316	2014-02-06 20:00:00	2014-02-08 21:30:04	2014-02-09 22:00:00	7.59982	118.1	2.4	2014-02-07 11:00:00	2014-02-09 08:00:00	2014-02-10 02:00:00	3.01	16.6	8.36	656529
317	2014-02-26 12:00:00	2014-02-26 21:29:58	2014-02-27 10:00:00	8.99878	22.7	2.4	2014-02-26 19:00:00	2014-02-27 00:45:00	2014-02-27 11:00:00	3.87	5.04	4.19	7852.5
318	2014-02-27 17:00:00	2014-02-28 01:29:57	2014-02-28 17:00:00	4.79832	18.6	25.1	2014-02-28 16:00:00	2014-02-28 16:15:00	2014-02-28 21:00:00	4.31	4.35	4.03	1683
319	2014-03-03	2014-03-03 16:30:00	2014-03-03 20:00:00	1.89957	9.2	43.7	2014-03-03 00:15:00	2014-03-03 01:00:00	2014-03-04 03:00:00	3.87	4.03	3.91	4843.35
320	2014-03-05 09:03:45	2014-03-05 17:30:00	2014-03-05 22:00:00	6.09998	19.8	28.1	2014-03-05 13:00:00	2014-03-06 02:45:00	2014-03-06 12:00:00	4.03	11.4	3.95	54140.9
321	2014-03-29 02:00:00	2014-03-29 11:30:04	2014-03-30	2.19961	18.5	11	2014-03-29 15:00:00	2014-03-29 17:45:00	2014-03-30 02:00:00	2.6525	3.14	2.685	6870.12
322	2014-03-31 05:00:00	2014-03-31 13:29:57	2014-03-31 15:00:00	0.29993	1.3	32.1	2014-03-31 15:00:00	2014-03-31 15:30:00	2014-03-31 17:00:00	2.7575	3.28	2.6225	593.438
323	2014-04-01 15:00:00	2014-04-01 15:30:00	2014-04-01 20:00:00	0.1	0.4	25	2014-04-01 15:15:00	2014-04-01 15:15:00	2014-04-02	3.14	3.28	2.975	398.121
324	2014-04-02 22:00:00	2014-04-03 17:57:43	2014-04-03 21:00:00	0.1	2.4	25.4	2014-04-02 22:15:00	2014-04-02 22:15:00	2014-04-03 22:00:00	2.87	3.01	2.7475	6373.34
325	2014-05-19 21:00:00	2014-05-21 04:29:54	2014-05-21 20:00:00	2.59884	33	0	2014-05-20 07:00:00	2014-05-21 19:30:00	2014-05-22	2.2975	3.57	2.78	20065.1
326	2014-08-03 21:02:08	2014-08-03 21:32:08	2014-08-04 19:00:00	2.72133	17.8	7.7	2014-08-04 15:00:00	2014-08-04 15:45:00	2014-08-04 20:00:00	1.84	1.94	1.65	853.65
327	2015-02-06 01:03:09	2015-02-08 11:29:59	2015-02-09 04:00:00	6.39932	85.9	0	2015-02-06 17:00:00	2015-02-09 00:07:00	2015-02-09 10:00:00	1.8275	11.6	3.98	276977
328	2015-05-17 23:00:00	2015-05-17 23:30:00	2015-05-18 01:00:00	0.5	0.8	20.6	2015-05-17 23:15:00	2015-05-17 23:30:00	2015-05-18 09:00:00	1.61	1.73	1.67	1006.62
329	2015-05-18 10:07:30	2015-05-18 10:37:30	2015-05-18 12:00:00	0.725	1	21.4	2015-05-18 10:22:30	2015-05-18 10:30:00	2015-05-18 13:00:00	1.73	1.73	1.61	54
330	2015-12-09 21:12:00	2015-12-10 21:32:45	2015-12-11 03:00:00	9	54	1.4	2015-12-10 06:00:00	2015-12-10 10:30:00	2015-12-11 04:00:00	1.8975	2.52	1.845	14008
331	2015-12-18 17:00:00	2015-12-18 20:30:03	2015-12-19 10:00:00	1.89831	6.1	25.7	2015-12-18 17:15:00	2015-12-19 03:45:00	2015-12-19 11:00:00	1.81	1.88	1.81	63
332	2015-12-20 04:15:00	2015-12-21 15:30:03	2015-12-22 21:00:00	6.39966	57.4	6.1	2015-12-21 08:00:00	2015-12-22 05:30:00	2015-12-22 22:00:00	2.07	4.42	2.52	79481.5
333	2016-01-24 13:00:00	2016-01-24 14:30:01	2016-01-24 17:00:00	0.299967	0.9	25	2016-01-24 13:15:00	2016-01-24 15:00:00	2016-01-24 18:00:00	2.44	2.52	2.395	490.382
334	2016-04-08 22:00:00	2016-04-09 09:30:01	2016-04-09 20:00:00	1.49997	12.1	0	2016-04-09 19:00:00	2016-04-09 22:15:00	2016-04-10	3.77	4.18	3.97	1260
335	2016-05-04 21:04:17	2016-05-05 10:30:01	2016-05-07 04:00:00	4.8976	40.7	4.3	2016-05-05 08:00:00	2016-05-05 23:00:00	2016-05-07 08:00:00	3.4425	4.8	3.6275	99516
336	2016-10-13 23:00:00	2016-10-14 09:30:05	2016-10-14 15:00:00	3.69489	16.5	0	2016-10-14 16:00:00	2016-10-14 20:00:00	2016-10-15 03:00:00	1.7925	2.35	1.6875	9822.17
337	2016-10-14 23:30:00	2016-10-15 00:30:03	2016-10-15 03:00:00	0.5	1.4	16.5	2016-10-15 19:00:00	2016-10-15 22:15:00	2016-10-16 03:00:00	1.9175	4.06	2.5	21076.5
338	2016-10-15 09:00:00	2016-10-16 07:30:02	2016-10-16 23:00:00	6	84.6	17.9	2016-10-15 19:00:00	2016-10-17	2016-10-17 01:00:00	1.9175	9.56	6.145	41202.9
339	2016-10-24	2016-10-24 01:29:55	2016-10-24 02:00:00	0.133155	0.3	0.1	2016-10-24 00:15:00	2016-10-24 06:30:00	2016-10-24 10:00:00	2.19	2.27	2.23	359.538
340	2016-10-26 23:30:00	2016-10-27 18:30:00	2016-10-28 10:00:00	3.99932	34.5	0.6	2016-10-27 13:00:00	2016-10-28 07:45:00	2016-10-28 14:00:00	2.4375	3.5	2.8875	27334.1
341	2016-12-07 08:00:00	2016-12-10 09:29:56	2016-12-10 21:00:00	9.19559	62.9	0	2016-12-08 10:00:00	2016-12-10 16:45:00	2016-12-11 03:00:00	2.4775	16.9	6.455	329421
342	2016-12-15 06:00:00	2016-12-15 21:29:59	2016-12-16 14:00:00	9.09953	45.7	0.2	2016-12-15 14:00:00	2016-12-15 22:00:00	2016-12-16 18:00:00	3.4175	9.76	5.205	205429
343	2017-01-06 21:10:00	2017-01-08 08:30:04	2017-01-12 17:00:00	4.79952	189.4	61.9	2017-01-07 12:00:00	2017-01-08 21:00:00	2017-01-12 18:00:00	3.285	67.4	8.11	6.10548e+06
344	2017-02-01 22:12:00	2017-02-03 03:29:56	2017-02-03 15:00:00	3.09894	16.9	0	2017-02-02 04:00:00	2017-02-03 12:00:00	2017-02-03 16:00:00	4.0525	4.76	4.205	7515.05
345	2017-02-05 14:00:00	2017-02-06 23:29:57	2017-02-07 09:00:00	6.49683	47.8	16.9	2017-02-05 21:00:00	2017-02-07 09:45:00	2017-02-07 13:00:00	4.5425	36.1	26.1	105375
346	2017-02-07 22:00:00	2017-02-08 05:13:18	2017-02-08 20:00:00	2.9	17.5	64.7	2017-02-08 04:00:00	2017-02-09 14:00:00	2017-02-09 16:00:00	18.475	52.6	29.25	1.05069e+06
347	2017-02-19 08:00:00	2017-02-19 22:29:58	2017-02-21 20:00:00	3.59887	76.1	39.8	2017-02-19 10:00:00	2017-02-21 05:30:00	2017-02-22	7.83	14.9	11.15	300963
348	2017-03-20 17:30:00	2017-03-21 00:30:04	2017-03-21 10:00:00	2.19948	11.3	0	2017-03-20 21:00:00	2017-03-21 18:30:00	2017-03-21 20:00:00	11.65	15.4	13.7	14665.6
349	2017-04-06 07:00:00	2017-04-06 15:30:03	2017-04-08 10:00:00	2.49972	39.7	0	2017-04-06 08:00:00	2017-04-07 09:15:00	2017-04-08 14:00:00	11.825	15.6	12.375	159781
350	2017-04-15 21:12:00	2017-04-15 21:42:00	2017-04-15 23:00:00	0.46	0.8	22.6	2017-04-15 22:00:00	2017-04-16 20:45:00	2017-04-17 15:00:00	11.075	12.8	11.175	105811
351	2017-04-16 06:00:00	2017-04-16 11:29:59	2017-04-17 04:00:00	0.599998	3.6	23.4	2017-04-16 06:00:00	2017-04-17 00:45:00	2017-04-17 06:00:00	11.05	13.4	12.55	21709.7
352	2017-11-13 10:00:00	2017-11-13 16:23:24	2017-11-13 21:00:00	1	4.8	1.3	2017-11-13 11:00:00	2017-11-14	2017-11-14 02:00:00	5.1325	5.77	5.27	4527.19
353	2017-11-14 22:15:00	2017-11-15 21:30:01	2017-11-17 21:00:00	9.59937	132.4	5.7	2017-11-15 09:00:00	2017-11-16 14:45:00	2017-11-18 07:00:00	5.035	21.1	7.825	1.16714e+06
354	2017-11-26 08:20:00	2017-11-26 13:29:57	2017-11-26 21:00:00	1.69986	13.5	0.1	2017-11-26 13:00:00	2017-11-27	2017-11-27 08:00:00	6.81	8.78	7.18	39073.4
355	2018-01-05 08:20:00	2018-01-05 19:30:04	2018-01-06 05:00:00	2.39988	10.6	0.3	2018-01-05 10:00:00	2018-01-06 05:15:00	2018-01-06 11:00:00	5.7325	8.04	6.45	22671.5
356	2018-03-20 04:07:30	2018-03-21 20:29:58	2018-03-22 10:00:00	6.79986	91.4	57	2018-03-20 16:00:00	2018-03-22 08:15:00	2018-03-23 03:00:00	5.305	17	9.61	496485
357	2018-04-05 22:00:00	2018-04-06 22:30:04	2018-04-07	7.29549	27.4	0	2018-04-06 07:00:00	2018-04-07 09:45:00	2018-04-08 05:00:00	6.77	14.6	7.605	343912
358	2018-12-20 21:12:00	2018-12-20 22:29:59	2018-12-21 06:00:00	1.19995	2.3	2.4	2018-12-20 21:27:00	2018-12-21 07:30:00	2018-12-21 10:00:00	3.08	3.39	3.255	1511.1
359	2018-12-22 22:00:00	2018-12-23 05:30:02	2018-12-23 10:00:00	0.699808	3	2.3	2018-12-23 16:00:00	2018-12-23 16:15:00	2018-12-23 17:00:00	3.4175	3.5	3.4175	74.25
360	2018-12-24 04:00:59	2018-12-24 09:30:04	2018-12-24 12:00:00	7.29651	29.7	5.3	2018-12-24 12:00:00	2018-12-24 18:45:00	2018-12-24 23:00:00	3.6625	5.48	3.74	24323
361	2019-01-16 09:30:00	2019-01-16 16:30:04	2019-01-17 10:00:00	8.99944	48.7	18.1	2019-01-16 22:00:00	2019-01-17 02:00:00	2019-01-17 13:00:00	3.77	5.34	3.8	23565.2
362	2019-02-08 06:00:00	2019-02-08 14:29:57	2019-02-08 20:00:00	0.19993	1.3	38.8	2019-02-08 06:15:00	2019-02-08 12:30:00	2019-02-08 22:00:00	3.2	3.51	3.275	3711.32
363	2019-02-09 13:20:00	2019-02-09 17:30:02	2019-02-10 10:00:00	11.0954	36.3	21.6	2019-02-09 13:35:00	2019-02-09 14:15:00	2019-02-10 11:00:00	3.41	3.41	3.2025	2021.14
364	2019-02-12 13:00:00	2019-02-14 04:29:58	2019-02-14 09:00:00	5.39806	71.4	37.6	2019-02-13 04:00:00	2019-02-14 08:30:00	2019-02-15 04:00:00	3.4975	14.8	6.34	723119
365	2019-03-01 16:00:00	2019-03-01 22:30:01	2019-03-02 05:00:00	10.4968	12.2	28.7	2019-03-01 16:15:00	2019-03-01 16:45:00	2019-03-02 07:00:00	5.02	5.02	4.565	439.589
366	2019-03-02 22:06:00	2019-03-03 01:29:56	2019-03-03 02:00:00	0.999208	2.2	40.9	2019-03-03 13:00:00	2019-03-03 15:15:00	2019-03-03 22:00:00	4.7925	5.3	4.9875	6882.75
367	2019-03-05 06:15:00	2019-03-05 07:29:59	2019-03-05 08:00:00	3.19953	3.6	18.2	2019-03-05 06:30:00	2019-03-05 16:45:00	2019-03-05 18:00:00	4.63	4.9	4.7	1168.43
368	2019-04-01 10:03:19	2019-04-01 21:31:37	2019-04-02 07:00:00	3.42458	11.3	9.7	2019-04-01 11:00:00	2019-04-02 17:00:00	2019-04-02 21:00:00	5.1075	6.95	6.3925	25724.5
369	2019-04-05 04:00:00	2019-04-05 05:30:01	2019-04-05 07:00:00	0.299967	0.8	11.3	2019-04-05 04:15:00	2019-04-05 04:15:00	2019-04-05 08:00:00	5.73	5.88	5.59	1111.5
370	2019-04-08 14:01:32	2019-04-08 14:31:32	2019-04-08 16:00:00	3.8538	6.1	0.8	2019-04-08 15:00:00	2019-04-09 04:15:00	2019-04-09 15:00:00	7.755	11.3	7.94	129689
371	2019-05-31 12:20:00	2019-05-31 13:29:58	2019-05-31 14:00:00	0.499933	0.8	13.7	2019-05-31 15:00:00	2019-05-31 18:00:00	2019-06-01	7.325	7.76	7.4625	5136
372	2019-06-01 06:00:00	2019-06-01 06:30:00	2019-06-01 13:00:00	0.1	0.5	5.7	2019-06-01 13:00:00	2019-06-01 18:30:00	2019-06-02 04:00:00	7.38	8.31	7.0925	23499.6
373	2019-06-03 02:00:00	2019-06-03 03:30:01	2019-06-03 21:00:00	1.09987	4.8	2	2019-06-03 13:00:00	2019-06-04 19:45:00	2019-06-05	7.5675	9.29	8.3425	33682.5
374	2020-03-18 03:00:00	2020-03-18 08:29:59	2020-03-19 19:00:00	1.59998	13.8	71	2020-03-19 06:00:00	2020-03-19 15:30:00	2020-03-19 22:00:00	3.7225	4.1	3.75	5306.52
