# Supplementary material for: Leveraging a time-series event separation method to disentangle time-varying hydrologic controls on streamflow – application to wildfire-affected catchments
Source: Copernicus journal article supplement (doi:10.5194/hess-29-27-2025), 2025-01-03
Supplement: Supplementary file 5 [file CampCreek_EventAttributes.xlsx]

## Sheet: Events_Sorting - Copy
	storm_start	storm_peak	storm_end	storm_peak_60int_mm/hr	storm_depth_mm	antPrecip_mm	flow_start	flow_peak	flow_end	flow_start_mag_cfs	flow_peak_mag_cfs	flow_end_mag_cfs	volume_ft3
1	1994-05-08 15:10:00	1994-05-09 04:29:56	1994-05-10 03:00:00	8.29854	62.9	6.6	1994-05-09 08:00:00	1994-05-10 07:00:00	1994-05-10 15:00:00	0.7275	43	27.75	1.04654e+06
2	1994-05-24 08:00:00	1994-05-24 14:30:01	1994-05-24 16:00:00	5.29957	15.1	4.6	1994-05-24 11:00:00	1994-05-24 11:45:00	1994-05-24 17:00:00	2.7	3.6	3.1	2100
3	1994-05-25 08:12:00	1994-05-25 16:29:56	1994-05-26 15:00:00	3.79769	43.7	19.7	1994-05-25 18:00:00	1994-05-26 08:30:00	1994-05-27 14:00:00	3.15	11	8.7	516978
4	1995-04-20 09:15:00	1995-04-20 13:30:14	1995-04-22 21:00:00	1.9	40.1	35.1	1995-04-21 07:00:00	1995-04-21 14:45:00	1995-04-22 22:00:00	0.7	1.3	1	8067.81
5	1995-04-23 13:00:00	1995-04-23 18:29:53	1995-04-24	1.59931	8.9	57.8	1995-04-23 13:15:00	1995-04-23 21:00:00	1995-04-24 13:00:00	1.2	1.3	1.2	5490
6	1995-04-25 13:00:00	1995-04-26 00:30:01	1995-04-26 05:00:00	4.09993	21.6	49	1995-04-25 18:00:00	1995-04-26 10:15:00	1995-04-27 09:00:00	1.425	7.4	5.9	182046
7	1995-04-29 10:30:00	1995-04-29 15:29:56	1995-04-30 02:00:00	1.1999	6	33.7	1995-04-29 12:00:00	1995-05-01 01:45:00	1995-05-02 13:00:00	15.25	24	20	934236
8	1995-04-30 11:00:00	1995-04-30 14:38:52	1995-04-30 18:00:00	0.4	1.6	30.8	1995-04-30 14:00:00	1995-05-01 07:30:00	1995-05-02	16.75	28	24.75	413120
9	1995-05-02 11:30:00	1995-05-02 12:00:00	1995-05-02 19:00:00	0.15	0.6	10.8	1995-05-02 11:45:00	1995-05-02 11:45:00	1995-05-02 20:00:00	21	21	20	790.909
10	1995-05-03 11:00:00	1995-05-03 11:30:00	1995-05-03 18:00:00	0.1	0.8	11.4	1995-05-03 11:15:00	1995-05-03 11:15:00	1995-05-03 20:00:00	20	21	20	13050
11	1995-05-04 13:30:00	1995-05-04 16:29:59	1995-05-04 19:00:00	1.2	4.1	12.2	1995-05-04 15:00:00	1995-05-05 18:30:00	1995-05-07 22:00:00	18	42	32.75	3.12403e+06
12	1995-05-05 11:20:00	1995-05-05 15:30:02	1995-05-05 18:00:00	1.49994	5.6	7.1	1995-05-05 13:00:00	1995-05-06 08:15:00	1995-05-07 04:00:00	22.75	57	38.5	2.02354e+06
13	1995-05-16 11:20:00	1995-05-16 22:29:58	1995-05-17 20:00:00	8.19918	79.5	4.6	1995-05-16 20:00:00	1995-05-17 09:45:00	1995-05-18 06:00:00	13.5	88	58.75	2.87174e+06
14	1995-05-22 14:00:00	1995-05-22 15:30:13	1995-05-22 17:00:00	0.5	1.3	7.9	1995-05-22 14:15:00	1995-05-22 14:15:00	1995-05-22 21:00:00	47	47	43	8666.67
15	1995-05-23 02:00:00	1995-05-23 19:30:02	1995-05-24 11:00:00	0.999759	9.1	9.2	1995-05-23 03:00:00	1995-05-23 08:45:00	1995-05-24 12:00:00	42.75	44	38	181575
16	1995-05-24 18:00:00	1995-05-25 15:30:00	1995-05-25 22:00:00	0.6999	7.8	17.7	1995-05-24 18:00:00	1995-05-26 15:15:00	1995-05-27 04:00:00	39.25	54	49.5	805732
17	1995-05-26 17:05:27	1995-05-26 18:30:03	1995-05-27 05:00:00	3.89892	8.8	18.2	1995-05-26 18:00:00	1995-05-26 18:45:00	1995-05-27 07:00:00	53.25	54	49	51416.8
18	1995-05-27 14:00:00	1995-05-27 15:30:13	1995-05-28 03:00:00	0.5	3.1	27	1995-05-27 14:15:00	1995-05-27 15:00:00	1995-05-28 08:00:00	48	49	42	66802.8
19	1995-05-28 10:00:00	1995-05-29 22:30:00	1995-05-30 23:00:00	1.39996	24.4	30.1	1995-05-28 20:00:00	1995-05-30 14:45:00	1995-05-31 01:00:00	39.5	145	78	3.85171e+06
20	1995-06-01 18:00:00	1995-06-01 18:30:00	1995-06-01 20:00:00	0.2	0.5	27.5	1995-06-01 19:00:00	1995-06-01 19:30:00	1995-06-02 05:00:00	58.25	59	37.75	27753.8
21	1995-06-02 12:00:00	1995-06-02 19:24:49	1995-06-02 23:00:00	2.2	6.9	28	1995-06-02 15:00:00	1995-06-03 13:15:00	1995-06-03 20:00:00	34	41	35	134286
22	1995-06-03 15:30:00	1995-06-04 16:30:02	1995-06-04 18:00:00	0.999543	6.5	7.4	1995-06-04 03:00:00	1995-06-05 05:45:00	1995-06-06 22:00:00	32	50	35.25	1.72256e+06
23	1995-06-08 01:00:00	1995-06-09 05:30:03	1995-06-09 07:00:00	1.09973	12	14.4	1995-06-08 01:00:00	1995-06-09 21:00:00	1995-06-11 11:00:00	28.5	40	31	1.27716e+06
24	1995-06-25 19:00:00	1995-06-25 19:30:00	1995-06-25 22:00:00	0.1	0.4	18.9	1995-06-25 19:15:00	1995-06-25 19:15:00	1995-06-26 14:00:00	4.9	4.9	4.4	14316
25	1995-07-01 09:30:00	1995-07-02 05:30:02	1995-07-02 13:00:00	1.49959	10.6	55.7	1995-07-01 15:00:00	1995-07-02 05:30:00	1995-07-05 17:00:00	9.5	29	14	3.38658e+06
26	1997-04-26 07:20:00	1997-04-26 08:29:58	1997-04-26 17:00:00	0.599899	2.4	200.5	1997-04-26 07:35:00	1997-04-26 15:00:00	1997-04-26 18:00:00	0.03	0.29	0.16	786.732
27	1997-04-27 23:00:00	1997-04-28 02:29:57	1997-04-28 03:00:00	0.199887	0.4	180.1	1997-04-27 23:15:00	1997-04-28 15:45:00	1997-04-28 17:00:00	0.03	0.24	0.1375	1093.64
28	1997-05-06 11:00:00	1997-05-06 11:30:00	1997-05-06 16:00:00	0.4	0.7	0	1997-05-06 11:00:00	1997-05-07 10:00:00	1997-05-07 12:00:00	16.75	19	16	5193
29	1997-05-10 14:00:00	1997-05-10 15:30:01	1997-05-10 18:00:00	0.699901	1.8	0.7	1997-05-10 16:00:00	1997-05-11 02:00:00	1997-05-11 11:00:00	12.5	14	12	77169.1
30	1997-05-11 13:06:39	1997-05-11 14:29:57	1997-05-12	1.8996	5.7	2.5	1997-05-11 16:00:00	1997-05-12 02:00:00	1997-05-12 06:00:00	12.5	16	14	60999.1
31	1997-06-04 16:03:09	1997-06-04 16:33:09	1997-06-04 19:00:00	1.80525	2.1	9.6	1997-06-04 16:18:09	1997-06-04 18:00:00	1997-06-04 20:00:00	2	2.7	2	900
32	1997-06-06 13:00:00	1997-06-06 16:30:03	1997-06-07 04:00:00	12.4976	52.5	30.2	1997-06-06 16:00:00	1997-06-06 22:00:00	1997-06-08 05:00:00	2.275	218	38.5	1.22552e+07
33	1998-02-18 11:00:00	1998-02-18 17:20:23	1998-02-18 23:00:00	0.2	1.7	5.5	1998-02-18 11:00:00	1998-02-18 11:30:00	1998-02-19	0.255	0.94	0	625.327
34	1998-03-17 12:10:00	1998-03-17 13:29:59	1998-03-18 23:00:00	2.99999	23.3	1.2	1998-03-19 10:00:00	1998-03-19 10:30:00	1998-03-19 13:00:00	2.675	7.4	0.01	4652.25
35	1998-03-19 13:00:00	1998-03-19 17:29:58	1998-03-19 20:00:00	0.699965	2.8	24.5	1998-03-19 13:15:00	1998-03-20 13:30:00	1998-03-20 17:00:00	0.01	0.07	0.0225	618.882
36	1998-03-30 02:00:00	1998-03-30 04:29:56	1998-03-31 04:00:00	1.19939	5.9	8.1	1998-03-30 12:00:00	1998-03-30 15:30:00	1998-04-01 06:00:00	2.25	4.1	3.6	161482
37	1998-04-20 13:00:00	1998-04-20 13:30:00	1998-04-20 19:00:00	0.1	0.6	14.6	1998-04-20 13:15:00	1998-04-20 15:00:00	1998-04-20 20:00:00	2.9	3.1	2.9	2340
38	1998-04-25	1998-04-25 22:59:59	1998-04-26 16:00:00	0.5	9.4	1.2	1998-04-25 03:00:00	1998-04-26 08:00:00	1998-04-27 05:00:00	7.6	12	10	186246
39	1998-05-04 20:30:00	1998-05-04 21:00:00	1998-05-05 03:00:00	0.125	0.5	0.1	1998-05-04 20:45:00	1998-05-04 21:00:00	1998-05-05 04:00:00	8.2	8.7	8.2	7200
40	1998-07-13 17:30:00	1998-07-13 18:29:57	1998-07-13 19:00:00	0.299933	0.5	21.8	1998-07-13 17:45:00	1998-07-13 20:15:00	1998-07-13 21:00:00	0	0.11	0	108
41	1998-07-22 11:00:00	1998-07-22 16:29:59	1998-07-23 03:00:00	1.9	9.3	16.4	1998-07-22 11:15:00	1998-07-22 19:15:00	1998-07-23 04:00:00	0	0.24	0	261
42	1998-07-24 11:00:00	1998-07-24 17:30:01	1998-07-25 02:00:00	0.499938	2.5	29.1	1998-07-24 11:15:00	1998-07-25 03:30:00	1998-07-25 04:00:00	0	0.03	0	36
43	1998-07-28 13:00:00	1998-07-29 13:29:58	1998-07-29 20:00:00	2.9988	19.6	10	1998-07-28 21:00:00	1998-07-30 17:00:00	1998-07-31 12:00:00	0.4675	112	4.1	1.09501e+06
44	1998-12-07 09:00:00	1998-12-07 09:30:00	1998-12-07 16:00:00	0.1	0.8	3.5	1998-12-07 09:15:00	1998-12-07 12:15:00	1998-12-07 17:00:00	0	0.03	0	45
45	1999-03-12 07:00:00	1999-03-12 15:30:03	1999-03-12 20:00:00	0.3	2.4	1.1	1999-03-12 07:15:00	1999-03-12 11:00:00	1999-03-12 21:00:00	0	0.29	0	900
46	1999-04-01 17:30:00	1999-04-02 03:30:02	1999-04-02 09:00:00	2.29994	13.5	3.7	1999-04-01 18:00:00	1999-04-01 18:30:00	1999-04-02 12:00:00	0.42	0.94	0.025	2966.88
47	1999-04-03 09:20:00	1999-04-03 09:50:00	1999-04-03 17:00:00	0.222222	1.1	17.2	1999-04-03 09:35:00	1999-04-03 12:15:00	1999-04-03 18:00:00	0.16	0.2	0	1053.82
48	1999-04-04 14:00:00	1999-04-05 05:29:59	1999-04-05 11:00:00	1.09995	4.4	18.3	1999-04-04 17:00:00	1999-04-05 08:45:00	1999-04-05 13:00:00	0.2425	0.5	0.16	2865.57
49	1999-04-14 18:00:00	1999-04-15 02:29:57	1999-04-15 07:00:00	1.19961	6.6	9	1999-04-15 10:00:00	1999-04-15 10:30:00	1999-04-15 13:00:00	0.22	0.35	0	337.5
50	1999-04-24 11:00:00	1999-04-25 01:29:58	1999-04-25 05:00:00	1.99996	9.8	67.5	1999-04-24 11:15:00	1999-04-25	1999-04-25 06:00:00	0.5	0.5	0	183.75
51	1999-05-16 15:30:00	1999-05-16 17:29:58	1999-05-16 19:00:00	0.299966	0.8	0.4	1999-05-16 16:00:00	1999-05-16 21:00:00	1999-05-17 12:00:00	49.5	65	51	440477
52	1999-05-22 23:30:00	1999-05-23	1999-05-23 01:00:00	0.15	0.3	3	1999-05-22 23:45:00	1999-05-22 23:45:00	1999-05-23 09:00:00	31	31	29	25491.9
53	1999-05-24 13:00:00	1999-05-25 06:30:02	1999-05-25 15:00:00	2.69898	20.1	3.3	1999-05-24 14:00:00	1999-05-25 10:45:00	1999-05-27 02:00:00	24.75	41	35	1.01062e+06
54	1999-06-15 08:30:00	1999-06-15 12:30:01	1999-06-15 19:00:00	0.699872	2.2	29.6	1999-06-15 08:45:00	1999-06-16	1999-06-16 10:00:00	16	16	14	29970
55	1999-07-31 09:00:00	1999-07-31 12:29:57	1999-08-01 21:00:00	4.99762	22.4	29.2	1999-07-31 10:00:00	1999-07-31 12:00:00	1999-08-02 02:00:00	0.2775	29	0.5	110528
56	2006-03-19 10:20:00	2006-03-19 17:29:59	2006-03-20 17:00:00	2.29994	12.8	3.6	2006-03-19 10:35:00	2006-03-20 12:45:00	2006-03-20 18:00:00	0	0.02	0	108
57	2006-05-22 15:00:00	2006-05-22 20:29:59	2006-05-22 22:00:00	10.6998	11.7	2	2006-05-22 15:15:00	2006-05-22 21:30:00	2006-05-22 23:00:00	0	0.02	0	27
58	2006-06-25 12:30:00	2006-06-25 13:29:57	2006-06-25 20:00:00	4.49712	5	3.7	2006-06-25 14:00:00	2006-06-25 14:45:00	2006-06-25 21:00:00	3	12	0	8389.29
59	2006-07-02 15:00:00	2006-07-02 16:30:01	2006-07-02 18:00:00	1.19964	1.9	4.5	2006-07-02 18:00:00	2006-07-02 18:30:00	2006-07-02 20:00:00	0.1775	0.24	0	146.531
60	2006-07-05 15:04:17	2006-07-05 16:29:59	2006-07-05 22:00:00	24.4979	67	13.7	2006-07-05 18:00:00	2006-07-05 18:30:00	2006-07-06 01:00:00	2.225	4.4	0.0025	3729.38
61	2006-07-06 16:06:39	2006-07-06 20:29:54	2006-07-06 21:00:00	1.90208	3.9	80.8	2006-07-06 16:21:39	2006-07-06 17:45:00	2006-07-06 23:00:00	0	0.35	0.005	1180.04
62	2006-07-09 10:07:30	2006-07-09 15:29:59	2006-07-09 21:00:00	1.69984	6	110.7	2006-07-09 15:00:00	2006-07-09 15:45:00	2006-07-09 22:00:00	0.5475	1.2	0.0025	1325.89
63	2006-07-10 16:30:00	2006-07-10 18:29:58	2006-07-10 20:00:00	1.99952	3	105.1	2006-07-10 16:45:00	2006-07-10 20:15:00	2006-07-10 22:00:00	0	0.29	0	900
64	2006-07-11 13:01:01	2006-07-11 14:30:02	2006-07-11 16:00:00	30.6817	37.6	108.1	2006-07-11 13:16:01	2006-07-12 16:00:00	2006-07-16 07:00:00	0	0.59	0.11	569838
65	2006-07-12 12:20:00	2006-07-12 12:50:00	2006-07-12 14:00:00	0.3	0.6	78.6	2006-07-12 16:00:00	2006-07-13 11:45:00	2006-07-15 16:00:00	0.6225	3.3	0.35	452782
66	2007-05-01 12:12:00	2007-05-01 15:36:38	2007-05-01 18:00:00	0.955406	2.6	1.3	2007-05-01 16:00:00	2007-05-02 10:45:00	2007-05-03 16:00:00	3.95	5.6	5.125	94836.2
67	2007-05-02 02:05:27	2007-05-02 08:29:57	2007-05-02 16:00:00	2.99835	10.9	3.9	2007-05-02 04:00:00	2007-05-02 23:15:00	2007-05-03 16:00:00	4.45	5.9	5.125	71142.2
68	2012-04-11 13:30:00	2012-04-11 21:30:05	2012-04-11 23:00:00	6.6	22.3	0	2012-04-11 21:00:00	2012-04-11 23:15:00	2012-04-12 01:00:00	0.335	2.69	0	2734.31
69	2012-04-14 20:02:13	2012-04-15 01:30:00	2012-04-15 06:00:00	4.59916	17.4	22.5	2012-04-14 20:17:13	2012-04-15 02:30:00	2012-04-15 07:00:00	0	0.07	0	153
70	2012-04-26 19:02:51	2012-04-26 19:32:51	2012-04-27 05:00:00	2.176	7.5	0	2012-04-26 19:17:51	2012-04-27 03:00:00	2012-04-27 06:00:00	0	0.24	0	459
71	2012-05-06 20:12:00	2012-05-07 14:31:32	2012-05-08 01:00:00	3.72563	16.5	0	2012-05-06 20:27:00	2012-05-07 12:00:00	2012-05-08 02:00:00	0	0.2	0	1503
72	2012-05-11 15:12:00	2012-05-11 20:29:58	2012-05-11 23:00:00	2.49903	5.1	16.5	2012-05-11 15:27:00	2012-05-11 23:00:00	2012-05-12 01:00:00	0	0.24	0	477
73	2012-05-13 12:06:39	2012-05-13 14:29:58	2012-05-13 15:00:00	1.19956	2.3	5.6	2012-05-13 12:21:39	2012-05-13 16:00:00	2012-05-13 17:00:00	0	0.01	0	18
74	2012-05-23 14:00:00	2012-05-24 00:29:53	2012-05-24 05:00:00	2.59701	11.4	4.2	2012-05-23 14:15:00	2012-05-23 20:45:00	2012-05-24 06:00:00	0	0.11	0	171
75	2012-06-16 11:12:00	2012-06-16 12:29:59	2012-06-16 15:00:00	2.49986	4.6	1.9	2012-06-16 14:00:00	2012-06-16 14:30:00	2012-06-16 16:00:00	0.29	0.81	0	685.125
76	2012-07-03 06:00:00	2012-07-03 18:29:56	2012-07-04 05:00:00	3.49885	8.9	5.5	2012-07-03 06:15:00	2012-07-03 19:45:00	2012-07-04 06:00:00	0	0.03	0	27
77	2012-07-08 11:20:00	2012-07-08 19:30:01	2012-07-09 18:00:00	4.59912	14.5	30.7	2012-07-08 17:00:00	2012-07-08 17:15:00	2012-07-09 20:00:00	2.5775	6.61	0	5737.19
78	2012-07-17 17:00:00	2012-07-17 17:30:00	2012-07-17 21:00:00	11	13.5	3.9	2012-07-17 17:15:00	2012-07-17 19:30:00	2012-07-17 22:00:00	0	0.24	0	261
79	2013-02-20 12:15:00	2013-02-20 20:30:01	2013-02-21 17:00:00	3.89971	14.8	0.9	2013-02-21 12:00:00	2013-02-21 12:15:00	2013-02-21 18:00:00	0.1725	0.42	0	266.906
80	2013-04-02 16:07:30	2013-04-02 16:37:30	2013-04-02 21:00:00	0.703846	1.2	0	2013-04-02 16:22:30	2013-04-03 09:45:00	2013-04-03 10:00:00	0	0.01	0	9
81	2013-04-14 00:03:19	2013-04-14 00:33:19	2013-04-14 03:00:00	1.8721	3.4	2.7	2013-04-14 02:00:00	2013-04-14 02:15:00	2013-04-14 04:00:00	0.1075	0.2	0.0025	171
82	2013-04-17 06:05:27	2013-04-17 11:30:02	2013-04-17 21:00:00	2.49924	16.7	5.4	2013-04-17 06:20:27	2013-04-17 13:00:00	2013-04-17 22:00:00	0	0.01	0	18
83	2013-04-22 09:00:00	2013-04-23 10:29:59	2013-04-23 17:00:00	2.69975	7.3	18.1	2013-04-22 09:15:00	2013-04-23 08:30:00	2013-04-23 18:00:00	0	0.01	0	9
84	2013-05-01 02:00:00	2013-05-01 09:30:02	2013-05-01 23:00:00	1.59987	12.2	1	2013-05-01 02:15:00	2013-05-01 13:45:00	2013-05-02	0	0.2	0	963
85	2013-05-08 05:12:00	2013-05-09 13:30:48	2013-05-09 19:00:00	7.78113	42.8	0	2013-05-08 12:00:00	2013-05-09 18:30:00	2013-05-09 20:00:00	0.1475	0.7	0	6680.76
86	2013-06-17 12:05:27	2013-06-17 13:29:57	2013-06-17 21:00:00	4.59762	14.2	10.3	2013-06-17 12:20:27	2013-06-17 14:30:00	2013-06-17 22:00:00	0	0.24	0	288
87	2013-06-29 10:30:00	2013-06-29 11:29:57	2013-06-29 16:00:00	1.59906	3.7	2.7	2013-06-29 10:45:00	2013-06-29 12:30:00	2013-06-29 17:00:00	0	0.24	0	468
88	2013-06-30 06:30:00	2013-06-30 20:29:54	2013-06-30 21:00:00	1.899	3.7	6.4	2013-07-01 16:00:00	2013-07-01 17:00:00	2013-07-01 23:00:00	0.2525	106	1.8125	205240
89	2013-07-10 10:12:00	2013-07-10 13:30:02	2013-07-10 15:00:00	11.1959	16.1	19.8	2013-07-10 15:00:00	2013-07-10 19:35:00	2013-07-11 06:00:00	0.22	5.56	1.0425	54128.7
90	2013-07-12 13:00:00	2013-07-12 17:28:58	2013-07-12 19:00:00	0.2	0.9	33.7	2013-07-12 16:00:00	2013-07-12 16:45:00	2013-07-12 22:00:00	0.695	1.66	0.04	2300.62
91	2013-07-13 11:15:00	2013-07-13 17:29:53	2013-07-13 19:00:00	1.49947	4.3	27.9	2013-07-13 14:00:00	2013-07-13 20:15:00	2013-07-14 19:00:00	0.18	0.59	0.24	22940.7
92	2013-07-14 10:30:00	2013-07-14 21:30:03	2013-07-15 14:00:00	6.29491	26.4	22.6	2013-07-14 20:00:00	2013-07-14 23:35:00	2013-07-15 15:00:00	0.4425	11.2	1.27	57763.3
93	2013-08-06 18:00:00	2013-08-07 13:29:58	2013-08-07 14:00:00	2.49967	6	17.8	2013-08-06 18:15:00	2013-08-07 14:45:00	2013-08-07 15:00:00	0	0.16	0.01	144.108
94	2013-08-08 13:01:37	2013-08-08 13:31:37	2013-08-08 20:00:00	3.60135	5	23.8	2013-08-09 17:00:00	2013-08-09 18:15:00	2013-08-09 22:00:00	0.835	231	1.7075	520291
95	2013-09-14 14:06:00	2013-09-14 17:29:56	2013-09-14 18:00:00	14.2881	17.5	176.8	2013-09-14 14:21:00	2013-09-15	2013-09-15 05:00:00	46.8	46.8	33.575	5725.12
96	2013-09-15 07:30:00	2013-09-15 13:29:57	2013-09-16 08:00:00	5.09692	23.6	194.3	2013-09-15 12:00:00	2013-09-17 01:00:00	2013-09-17 10:00:00	37.825	59.3	41.375	890048
97	2014-02-08 12:06:00	2014-02-08 12:36:00	2014-02-08 14:00:00	0.95	1.5	5.2	2014-02-08 14:00:00	2014-02-08 14:30:00	2014-02-08 19:00:00	1.67	3.34	0	13955.9
98	2014-02-19 18:30:00	2014-02-19 21:30:05	2014-02-20	3.69779	7.8	0	2014-02-19 18:45:00	2014-02-20	2014-02-20 02:00:00	0	2.31	0	7209
99	2014-03-07 11:03:31	2014-03-07 14:30:04	2014-03-08 01:00:00	4.79942	26.1	5.3	2014-03-07 13:00:00	2014-03-07 15:15:00	2014-03-08 02:00:00	1.295	2.69	0	15928.6
100	2014-03-11 11:06:00	2014-03-11 12:30:00	2014-03-11 15:00:00	3.29975	8.1	26.1	2014-03-11 13:00:00	2014-03-11 14:45:00	2014-03-11 18:00:00	0.905	2.31	0	11362.3
101	2014-04-02 22:12:00	2014-04-03 01:30:02	2014-04-03 12:00:00	4.1	26.8	0	2014-04-03 04:00:00	2014-04-03 04:15:00	2014-04-03 14:00:00	0.6175	0.7	0	3752.55
102	2014-04-16 15:30:00	2014-04-16 19:30:01	2014-04-17 01:00:00	3.19991	10	14	2014-04-16 16:00:00	2014-04-16 16:15:00	2014-04-17 02:00:00	1.0425	1.15	0	8724.04
103	2014-05-11 06:00:00	2014-05-11 19:29:57	2014-05-11 23:00:00	2.29864	12.5	1.1	2014-05-11 12:00:00	2014-05-11 13:45:00	2014-05-12	0.985	1.39	0	4731.56
104	2014-05-23 16:00:00	2014-05-23 20:29:58	2014-05-23 22:00:00	7.79959	16.1	0.2	2014-05-23 21:00:00	2014-05-23 21:45:00	2014-05-24	1.825	3.11	0	1840.12
105	2014-05-24 18:00:00	2014-05-24 18:30:00	2014-05-24 22:00:00	5	14.8	16.3	2014-05-24 19:00:00	2014-05-24 20:15:00	2014-05-25 02:00:00	0.4075	2.31	0	6432.27
106	2014-05-30 12:06:00	2014-05-30 15:30:02	2014-05-30 17:00:00	3.6981	7.3	23.3	2014-05-30 12:21:00	2014-05-31 14:30:00	2014-05-31 16:00:00	0	0.29	0	297
107	2014-06-08 13:00:00	2014-06-08 19:32:43	2014-06-09	2.13605	4.3	0	2014-06-08 13:15:00	2014-06-08 21:15:00	2014-06-09 01:00:00	0	0.16	0	189
108	2014-06-22 15:04:00	2014-06-22 16:29:54	2014-06-22 17:00:00	4.69655	6.3	0.1	2014-06-22 15:19:00	2014-06-22 17:45:00	2014-06-22 18:00:00	0	0.03	0.0025	28.35
109	2014-06-24 13:00:00	2014-06-24 15:30:02	2014-06-24 18:00:00	1.89947	4.8	8.4	2014-06-24 13:15:00	2014-06-24 15:30:00	2014-06-24 19:00:00	0	0.02	0	18
110	2014-07-14 12:00:41	2014-07-14 12:30:41	2014-07-14 18:00:00	8.61822	16.6	24.8	2014-07-14 12:15:41	2014-07-14 14:15:00	2014-07-14 19:00:00	0	0.2	0	441
111	2014-07-15 01:02:24	2014-07-15 01:32:24	2014-07-15 03:00:00	2.404	2.6	37.8	2014-07-15 01:17:24	2014-07-15 17:30:00	2014-07-15 18:00:00	0	0.02	0.005	18.2045
112	2014-07-15 15:01:20	2014-07-16 13:30:15	2014-07-16 22:00:00	22.4125	59.7	40.4	2014-07-16 20:00:00	2014-07-17	2014-07-17 11:00:00	2.545	11.8	2.7425	120243
113	2014-07-27 14:06:39	2014-07-27 19:30:02	2014-07-27 21:00:00	2.69869	4.4	29.7	2014-07-27 20:00:00	2014-07-27 20:45:00	2014-07-27 22:00:00	0.2125	0.5	0.005	501.469
114	2014-07-29 13:20:00	2014-07-29 17:30:02	2014-07-29 21:00:00	20.4881	32.9	48.8	2014-07-29 20:00:00	2014-07-30 20:30:00	2014-08-04 18:00:00	2.4125	11.8	4.7175	2.72109e+06
115	2014-07-30 04:06:00	2014-07-30 17:30:02	2014-07-30 23:00:00	3.69909	21.5	81.7	2014-07-30 11:00:00	2014-07-31 12:45:00	2014-08-03 14:00:00	4.15	15.6	6.075	1.92785e+06
116	2014-08-05 12:00:00	2014-08-05 15:29:57	2014-08-05 18:00:00	3.1979	5.5	13.5	2014-08-05 15:00:00	2014-08-05 17:45:00	2014-08-06 12:00:00	3.8225	5.9	3.7575	67772.1
117	2014-08-07 22:20:00	2014-08-07 23:29:58	2014-08-08 01:00:00	3.19903	3.7	8.7	2014-08-07 23:00:00	2014-08-08 11:30:00	2014-08-08 14:00:00	3.3975	6.25	3.82	34155.4
118	2015-04-27 06:04:00	2015-04-27 06:34:00	2015-04-27 10:00:00	1.47339	3.8	22.8	2015-04-27 08:00:00	2015-04-27 17:45:00	2015-04-27 22:00:00	30.125	49.2	37.675	189533
119	2015-05-01 14:08:34	2015-05-01 14:38:34	2015-05-01 18:00:00	0.606346	1.1	3.8	2015-05-01 15:00:00	2015-05-01 17:45:00	2015-05-01 19:00:00	42.225	49.2	43.625	18888.8
120	2015-05-03 17:00:00	2015-05-03 22:31:36	2015-05-04 04:00:00	3.88371	10.5	1.1	2015-05-03 19:00:00	2015-05-03 19:30:00	2015-05-04 06:00:00	36.325	37.9	28.525	39400.6
121	2015-05-06 05:07:30	2015-05-06 05:37:30	2015-05-06 08:00:00	0.75	1.6	63.1	2015-05-06 06:00:00	2015-05-06 07:15:00	2015-05-06 09:00:00	107	121	94.575	49359.4
122	2015-05-06 14:12:00	2015-05-06 15:29:59	2015-05-06 16:00:00	0.799979	1.3	64.7	2015-05-06 15:00:00	2015-05-06 18:00:00	2015-05-06 21:00:00	94.9	109	88.475	99668.4
123	2015-05-08 16:03:00	2015-05-09 13:17:23	2015-05-10	4.9	49.4	71	2015-05-08 17:00:00	2015-05-09 07:15:00	2015-05-10 01:00:00	57.7	368	166	8.44753e+06
124	2015-05-10 19:12:00	2015-05-10 19:42:00	2015-05-11	0.405	0.6	58.4	2015-05-10 23:00:00	2015-05-11 14:15:00	2015-05-11 19:00:00	77.85	93.6	77.425	141892
125	2015-05-13 14:06:39	2015-05-13 15:29:57	2015-05-13 17:00:00	5.59644	7.7	57.5	2015-05-13 16:00:00	2015-05-13 16:30:00	2015-05-13 23:00:00	97.225	121	62.975	51253.4
126	2015-05-14 17:00:51	2015-05-14 17:30:51	2015-05-14 20:00:00	6.90567	7.7	9.7	2015-05-14 18:00:00	2015-05-14 21:45:00	2015-05-15 07:00:00	76.35	81	51.45	284362
127	2015-05-16 12:08:34	2015-05-16 14:30:05	2015-05-16 19:00:00	2.197	5.2	17.4	2015-05-16 12:23:34	2015-05-16 12:30:00	2015-05-17 02:00:00	45.6	46.8	29.625	203119
128	2015-05-17 16:00:00	2015-05-18 02:35:30	2015-05-18 07:00:00	1.09073	6.4	22	2015-05-17 17:00:00	2015-05-19 07:00:00	2015-05-20 05:00:00	31.45	176	128.75	5.35265e+06
129	2015-05-18 18:30:00	2015-05-19 03:30:01	2015-05-19 16:00:00	6.29925	46.8	28.4	2015-05-18 19:00:00	2015-05-19 18:15:00	2015-05-20 05:00:00	22.125	209	128.75	7.2422e+06
130	2015-05-20 19:06:00	2015-05-21 02:30:01	2015-05-21 07:00:00	1.39956	6.8	58.4	2015-05-20 19:21:00	2015-05-20 20:30:00	2015-05-21 09:00:00	143	139	93.275	48311.2
131	2015-05-21 16:30:00	2015-05-22 05:29:59	2015-05-22 07:00:00	1.59997	13.7	65.2	2015-05-21 18:00:00	2015-05-22 07:15:00	2015-05-22 10:00:00	93.6	130	120	171889
132	2015-07-04 11:02:04	2015-07-04 12:29:58	2015-07-04 19:00:00	4.49952	8.5	56.1	2015-07-04 11:17:04	2015-07-04 11:30:00	2015-07-05 03:00:00	3.82	3.82	3.34	2706.68
133	2015-07-09 17:01:02	2015-07-09 19:29:58	2015-07-09 22:00:00	48.2802	61.9	53.8	2015-07-09 19:00:00	2015-07-09 22:30:00	2015-07-14 12:00:00	7.885	34.8	13.6	4.68239e+06
134	2016-04-18 22:12:00	2016-04-19 01:29:56	2016-04-19 04:00:00	1.69979	5.5	29.2	2016-04-18 22:27:00	2016-04-19 05:00:00	2016-04-19 07:00:00	0	0.29	0.035	2025.93
135	2016-04-29 05:30:00	2016-04-29 07:29:58	2016-04-30	2.39925	11.9	8.9	2016-04-29 09:00:00	2016-04-29 15:00:00	2016-04-30 01:00:00	7.1	8.18	6.43	33584.3
136	2016-04-30 11:30:00	2016-04-30 14:29:59	2016-04-30 18:00:00	0.599998	2.4	20.6	2016-04-30 11:45:00	2016-04-30 11:45:00	2016-04-30 19:00:00	5.81	5.81	5.51	968.276
137	2016-05-17 09:30:00	2016-05-17 12:29:53	2016-05-17 14:00:00	3.79509	6.3	15.7	2016-05-17 09:45:00	2016-05-17 09:45:00	2016-05-17 15:00:00	2.12	2.12	1.73	459.643
138	2016-05-17 22:00:00	2016-05-18 06:49:29	2016-05-18 08:00:00	0.7	1.7	20.7	2016-05-18 14:00:00	2016-05-18 17:30:00	2016-05-19 12:00:00	1.995	2.84	2.47	38819.6
139	2016-05-19 12:08:34	2016-05-19 12:38:34	2016-05-19 14:00:00	0.614278	0.8	22.4	2016-05-19 12:23:34	2016-05-19 13:30:00	2016-05-19 15:00:00	2.47	2.65	2.29	502.2
140	2016-05-26 11:10:00	2016-05-26 16:29:58	2016-05-26 18:00:00	3.7989	10.7	0	2016-05-26 13:00:00	2016-05-27 07:45:00	2016-05-28 08:00:00	0.2725	3.46	2.65	176691
141	2016-05-28 12:30:00	2016-05-28 13:00:00	2016-05-28 15:00:00	0.125	0.3	19.9	2016-05-28 12:45:00	2016-05-28 12:45:00	2016-05-28 16:00:00	2.12	2.12	1.96	11.0769
142	2016-05-29 12:15:00	2016-05-29 12:45:00	2016-05-29 17:00:00	0.30625	0.5	20.2	2016-05-29 15:00:00	2016-05-29 22:00:00	2016-05-29 23:00:00	1.66	1.8	1.695	241.172
143	2016-05-31 14:30:00	2016-05-31 18:30:01	2016-06-01 07:00:00	3.19901	9.9	20.9	2016-05-31 16:00:00	2016-05-31 16:45:00	2016-06-01 16:00:00	5.0475	15.6	2.335	86661.9
144	2016-06-06 11:01:23	2016-06-06 12:29:54	2016-06-06 13:00:00	5.59791	9.9	13.6	2016-06-06 11:16:23	2016-06-06 11:30:00	2016-06-06 14:00:00	0.52	0.52	0.26	30.6
145	2016-06-07 14:03:19	2016-06-07 14:33:19	2016-06-07 16:00:00	1.87743	3.3	13.6	2016-06-07 16:00:00	2016-06-07 18:30:00	2016-06-10 17:00:00	0.735	3.69	0.055	456386
146	2016-06-13 09:01:45	2016-06-13 09:31:45	2016-06-13 11:00:00	3.32333	4.2	11.6	2016-06-13 11:00:00	2016-06-13 11:45:00	2016-06-13 16:00:00	3.46	6.12	1.8	4868.1
147	2016-06-13 18:30:00	2016-06-13 20:29:58	2016-06-13 21:00:00	0.599864	1	12.5	2016-06-13 21:00:00	2016-06-13 21:30:00	2016-06-13 23:00:00	3.0225	4.67	2.12	2703.38
148	2016-06-20 19:00:00	2016-06-20 19:30:00	2016-06-20 23:00:00	27.1	31.2	0	2016-06-20 20:00:00	2016-06-20 22:45:00	2016-06-22 11:00:00	0.3325	11.2	2.84	391891
149	2016-08-09 18:02:43	2016-08-09 18:32:43	2016-08-09 20:00:00	2.12717	2.8	14.3	2016-08-09 18:17:43	2016-08-09 20:30:00	2016-08-09 21:00:00	0	0.07	0.0025	89.55
150	2016-08-12 14:15:00	2016-08-12 18:30:02	2016-08-12 21:00:00	3.19876	6	13.4	2016-08-12 20:00:00	2016-08-12 20:15:00	2016-08-12 23:00:00	0.3125	0.59	0	467.25
151	2016-08-19 12:30:00	2016-08-19 17:29:56	2016-08-19 20:00:00	7.39668	13.2	3.7	2016-08-19 18:00:00	2016-08-19 18:50:00	2016-08-20 04:00:00	8.69	36.4	0.0025	42106.8
152	2016-08-24 09:00:00	2016-08-24 12:35:28	2016-08-25 01:00:00	1.04521	4.1	13.5	2016-08-24 09:15:00	2016-08-24 15:45:00	2016-08-25 02:00:00	0	0.07	0	108
153	2016-08-28 14:08:34	2016-08-29 13:30:00	2016-08-29 19:00:00	6.99958	37.7	9.9	2016-08-28 22:00:00	2016-08-29 21:15:00	2016-08-30 22:00:00	0.9325	4.67	1.26	257075
154	2017-05-02 12:00:00	2017-05-02 13:30:01	2017-05-02 21:00:00	0.999966	4.8	9	2017-05-02 12:15:00	2017-05-02 14:45:00	2017-05-02 22:00:00	0	0.31	0	1062
155	2017-05-06 13:10:00	2017-05-06 18:29:58	2017-05-06 19:00:00	0.603208	1.3	6	2017-05-06 15:00:00	2017-05-06 15:15:00	2017-05-06 20:00:00	0.24	0.58	0	316.8
156	2017-05-08 11:30:00	2017-05-08 18:30:04	2017-05-09 01:00:00	3.69528	9.7	8.1	2017-05-08 18:00:00	2017-05-08 19:30:00	2017-05-09 04:00:00	0.145	0.99	0	3719.93
157	2017-05-10 20:07:30	2017-05-10 23:35:27	2017-05-11 04:00:00	1.08194	5.5	12.6	2017-05-10 20:22:30	2017-05-10 22:00:00	2017-05-11 05:00:00	0	0.58	0	1377
158	2017-05-17 22:12:00	2017-05-18 04:30:05	2017-05-18 22:00:00	4.29663	31.9	0	2017-05-18	2017-05-19 03:45:00	2017-05-19 12:00:00	0.1425	1.95	1.08	62657.9
159	2017-05-21 22:06:00	2017-05-22 04:33:18	2017-05-22 06:00:00	1.80552	4.7	34.3	2017-05-21 23:00:00	2017-05-22 05:30:00	2017-05-22 09:00:00	3.89	4.9	4.64	4320
160	2021-05-17 11:07:30	2021-05-18 08:29:53	2021-05-18 18:00:00	5.19585	32.9	1.4	2021-05-17 18:00:00	2021-05-19 01:30:00	2021-05-19 16:00:00	0.244286	16.1	11.9	527430
161	2021-05-29 14:10:00	2021-05-29 17:29:56	2021-05-30 02:00:00	8.09381	16.2	0.3	2021-05-29 19:00:00	2021-05-30 16:15:00	2021-05-30 18:00:00	0.45	6.93	4.2725	7064.17
162	2021-05-30 10:07:30	2021-05-30 14:29:57	2021-05-31 15:00:00	7.79816	33.3	16.5	2021-05-30 14:00:00	2021-06-01 06:30:00	2021-06-07 17:00:00	0.889286	8.43	0.65	3.72767e+06
