# Supplementary material for: Leveraging a time-series event separation method to disentangle time-varying hydrologic controls on streamflow – application to wildfire-affected catchments
Source: Copernicus journal article supplement (doi:10.5194/hess-29-27-2025), 2025-01-03
Supplement: Supplementary file 6 [file ClearCreek_EventAttributes.xlsx]

## Sheet: Events_Sorting - Copy
	storm_start	storm_peak	storm_end	storm_peak_60int_mm/hr	storm_depth_mm	antPrecip_mm	flow_start	flow_peak	flow_end	flow_start_mag_cfs	flow_peak_mag_cfs	flow_end_mag_cfs	volume_ft3
1	1986-10-01 12:30:00	1986-10-02 02:30:01	1986-10-03 05:00:00	1.09989	12.8	0	1986-10-01 22:00:00	1986-10-02 10:59:00	1986-10-03 16:00:00	21.625	30	23	563171
2	1986-10-09 13:20:00	1986-10-09 14:50:13	1986-10-09 17:00:00	0.5	1.7	0	1986-10-10 02:00:00	1986-10-10 07:58:00	1986-10-10 16:00:00	19.625	21	19	45889.8
3	1986-10-10 19:04:36	1986-10-10 19:34:54	1986-10-10 22:00:00	1.4	4.2	1.7	1986-10-10 22:00:00	1986-10-11 18:58:00	1986-10-12 18:00:00	19.625	27	21	644050
4	1986-10-30 18:30:00	1986-10-31 04:30:02	1986-11-01 05:00:00	0.5	6.9	0	1986-10-31	1986-10-31 13:54:00	1986-11-03 18:00:00	14.4583	19	15	925176
5	1986-11-17 05:30:00	1986-11-18 01:52:04	1986-11-18 14:00:00	0.2	5.4	0	1986-11-18 11:00:00	1986-11-19 03:51:00	1986-11-19 13:00:00	10.625	17	15	141230
6	1986-11-21 16:30:00	1986-11-21 17:00:00	1986-11-21 19:00:00	0.2	0.6	5.4	1986-11-21 16:45:00	1986-11-21 16:50:00	1986-11-21 20:00:00	12	12	11	900
7	1986-11-29 17:00:00	1986-11-29 17:30:00	1986-11-30 01:00:00	0.2	1.1	2.6	1986-11-29 17:15:00	1986-12-01	1986-12-01 04:00:00	9.4	9.4	5.2	2823.89
8	1987-02-11 20:00:00	1987-02-12 04:21:02	1987-02-12 17:00:00	0.7	6.3	0	1987-02-11 20:00:00	1987-02-12 20:36:00	1987-02-13 09:00:00	15.8125	29	17	339247
9	1987-02-13 09:00:00	1987-02-14 00:29:59	1987-02-14 07:00:00	3.89988	11.9	6.3	1987-02-13 15:00:00	1987-02-14 04:35:00	1987-02-14 18:00:00	16.8125	28	17	451042
10	1987-02-15 17:00:00	1987-02-16 04:29:55	1987-02-16 09:00:00	1.29934	5	18.2	1987-02-15 17:00:00	1987-02-15 19:35:00	1987-02-16 10:00:00	17.5625	28	19	275287
11	1987-03-07 12:00:00	1987-03-07 15:28:39	1987-03-07 17:00:00	0.2	0.9	0.3	1987-03-07 15:00:00	1987-03-07 21:31:00	1987-03-08 11:00:00	25.125	46	27	507623
12	1987-03-08 11:00:00	1987-03-09 00:30:03	1987-03-09 04:00:00	0.699905	3.7	1.2	1987-03-08 17:00:00	1987-03-08 22:31:00	1987-03-09 14:00:00	27	45	29	536045
13	1987-04-27 14:00:00	1987-04-27 14:30:00	1987-04-27 19:00:00	0.1	0.6	0	1987-04-27 18:00:00	1987-04-28 03:20:00	1987-04-28 05:00:00	85.1875	92	90.25	40447.8
14	1987-04-30 04:00:00	1987-04-30 04:30:00	1987-04-30 07:00:00	0.3	0.6	0.7	1987-04-30 04:00:00	1987-04-30 06:21:00	1987-04-30 08:00:00	95.1875	98	92.5625	28333.1
15	1987-05-11 15:00:00	1987-05-11 17:29:56	1987-05-11 19:00:00	0.399899	1.1	0.2	1987-05-11 15:15:00	1987-05-11 15:27:00	1987-05-11 22:00:00	101	101	99	16407.7
16	1987-05-12 11:30:00	1987-05-12 12:30:15	1987-05-12 20:00:00	0.3	2.1	1.3	1987-05-12 12:00:00	1987-05-12 23:27:00	1987-05-13 06:00:00	100.875	102	101.25	20190.5
17	1987-05-14 16:00:00	1987-05-14 17:43:26	1987-05-14 20:00:00	0.3	1	3.2	1987-05-15	1987-05-15 19:59:00	1987-05-16 03:00:00	100.75	121	108.688	461105
18	1987-05-15 07:20:00	1987-05-15 11:30:02	1987-05-15 15:00:00	0.499869	1.8	4.2	1987-05-15 09:00:00	1987-05-16 12:29:00	1987-05-20 01:00:00	102.553	139	129.5	6.6757e+06
19	1987-05-16 13:00:00	1987-05-16 13:30:00	1987-05-16 16:00:00	0.1	0.4	6	1987-05-16 13:00:00	1987-05-16 16:29:00	1987-05-16 20:00:00	139	140	135.875	29868.8
20	1987-05-17	1987-05-17 13:29:57	1987-05-18 04:00:00	1.09968	7.8	6.4	1987-05-17 08:00:00	1987-05-18 19:30:00	1987-05-19 04:00:00	135.375	158	139	586195
21	1987-07-10 06:00:00	1987-07-11 17:54:08	1987-07-11 23:00:00	0.6	7.7	0	1987-07-10 20:00:00	1987-07-12 09:57:00	1987-07-12 20:00:00	28.625	40	31	348913
22	1987-07-16 12:00:00	1987-07-16 15:29:57	1987-07-17 03:00:00	0.599932	2.7	0	1987-07-17 04:00:00	1987-07-17 10:59:00	1987-07-17 21:00:00	21.625	25	21	143317
23	1987-07-19 05:30:00	1987-07-20 01:52:04	1987-07-20 05:00:00	0.2	4.8	2.7	1987-07-19 06:00:00	1987-07-21 04:56:00	1987-07-21 20:00:00	20.625	28	21	456442
24	1987-07-20 10:00:00	1987-07-20 16:30:01	1987-07-21 05:00:00	1.89953	11.6	7.5	1987-07-20 10:00:00	1987-07-21 07:56:00	1987-07-21 20:00:00	21	31	21	424173
25	1987-08-05 18:30:00	1987-08-05 19:30:03	1987-08-05 23:00:00	1.0998	3.2	0.1	1987-08-06 04:00:00	1987-08-06 06:44:00	1987-08-06 19:00:00	11.625	13	11	68411.4
26	1987-08-07 10:00:00	1987-08-07 14:53:37	1987-08-07 20:00:00	0.6	3.5	30	1987-08-07 10:00:00	1987-08-07 12:44:00	1987-08-07 23:00:00	29.625	31	22	104920
27	1987-08-08 15:20:00	1987-08-08 16:29:58	1987-08-08 19:00:00	0.499933	1.4	33.5	1987-08-08 15:35:00	1987-08-08 15:43:00	1987-08-08 22:00:00	26	26	24	3861
28	1987-08-10 05:06:00	1987-08-10 06:30:00	1987-08-10 08:00:00	1.19991	2.7	34.8	1987-08-10 05:21:00	1987-08-10 05:27:00	1987-08-10 23:00:00	21	21	17	70252.2
29	1987-08-11 12:20:00	1987-08-11 19:20:58	1987-08-11 22:00:00	1	6.4	37.5	1987-08-11 22:00:00	1987-08-12 21:40:00	1987-08-13 06:00:00	16.875	52	22	429400
30	1987-08-20 04:02:24	1987-08-20 04:32:24	1987-08-20 18:00:00	2.408	5.8	0	1987-08-20 06:00:00	1987-08-21 01:34:00	1987-08-29 18:00:00	12.8125	16	13	3.05909e+06
31	1987-08-21 06:30:00	1987-08-21 12:29:57	1987-08-21 18:00:00	0.499931	3.2	5.8	1987-08-22 07:00:00	1987-08-22 17:48:00	1987-08-26 23:00:00	14.8125	16.25	15	1.43069e+06
32	1987-08-22 08:00:00	1987-08-22 16:50:29	1987-08-22 19:00:00	0.2	1.4	9	1987-08-22 08:00:00	1987-08-22 20:32:00	1987-08-25 23:00:00	15	21	16	1.09697e+06
33	1987-09-04 05:00:00	1987-09-04 05:30:00	1987-09-04 07:00:00	0.5	0.7	3	1987-09-04 08:00:00	1987-09-04 09:23:00	1987-09-04 17:00:00	14.1875	15	14	22509.6
34	1988-02-02 12:00:00	1988-02-02 14:28:50	1988-02-03 01:00:00	0.2	1.7	5.5	1988-02-02 12:15:00	1988-02-04	1988-02-04 17:00:00	12	12	6.4	109440
35	1988-02-26 07:00:00	1988-02-26 11:30:04	1988-02-26 21:00:00	0.2	1.7	0	1988-02-26 13:00:00	1988-02-26 17:00:00	1988-02-27 08:00:00	12.75	24	17	327763
36	1988-02-29	1988-02-29 15:29:59	1988-02-29 18:00:00	0.599988	3.1	1.7	1988-02-29 13:00:00	1988-02-29 21:00:00	1988-03-01 06:00:00	19.375	32	23	287654
37	1988-03-17 06:00:00	1988-03-18 01:57:43	1988-03-18 05:00:00	0.1	2.4	18.2	1988-03-17 06:00:00	1988-03-18 18:00:00	1988-03-19 09:00:00	16.375	46	10	1.77342e+06
38	1988-04-15 13:00:00	1988-04-15 19:29:55	1988-04-16 01:00:00	1.19948	7	4.4	1988-04-15 18:00:00	1988-04-17 01:00:00	1988-04-18	54.75	97	73.125	6.9073e+06
39	1988-04-16 07:20:00	1988-04-17 04:29:58	1988-04-17 10:00:00	2.79988	23.8	11.4	1988-04-16 08:00:00	1988-04-17 10:00:00	1988-04-17 18:00:00	69.5	248	101.125	3.70582e+06
40	1988-05-17 02:30:00	1988-05-17 04:07:26	1988-05-17 17:00:00	0.4	3	3.9	1988-05-17 03:00:00	1988-05-17 17:00:00	1988-05-18 06:00:00	253	312	294	1587775
41	1988-06-16 18:00:00	1988-06-17 01:30:50	1988-06-17 04:00:00	0.2	1.2	0	1988-06-16 18:15:00	1988-06-16 18:15:00	1988-06-17 11:00:00	94	92	90.125	8509.7
42	1988-06-19 02:20:00	1988-06-19 04:29:59	1988-06-19 08:00:00	0.299999	1.3	2.6	1988-06-19 05:00:00	1988-06-19 09:00:00	1988-06-19 14:00:00	80.125	84	82	61865.6
43	1988-06-20 10:00:00	1988-06-20 15:29:59	1988-06-20 18:00:00	0.199998	1	4.8	1988-06-21 01:00:00	1988-06-21 18:00:00	1988-06-22 03:00:00	76.5	99.7	87.125	761839
44	1988-07-27 05:30:00	1988-07-27 06:00:00	1988-07-27 08:00:00	0.15	0.4	2.9	1988-07-27 05:45:00	1988-07-27 05:45:00	1988-07-27 11:00:00	27	27	18.875	44919.6
45	1988-07-27 16:20:00	1988-07-27 16:50:00	1988-07-27 19:00:00	0.266667	0.7	3.3	1988-07-27 16:35:00	1988-07-27 16:45:00	1988-07-27 20:00:00	26	26	25	1263.46
46	1988-07-30 10:00:00	1988-07-30 14:24:16	1988-07-30 15:00:00	1	2.9	2	1988-07-30 19:00:00	1988-07-30 20:00:00	1988-07-30 22:00:00	24.25	28	24	18318.8
47	1988-07-31 11:30:00	1988-07-31 13:29:58	1988-07-31 16:00:00	0.699898	2.1	4.9	1988-07-31 15:00:00	1988-07-31 19:00:00	1988-08-01	23.375	72	28.75	411241
48	1988-08-01 05:20:00	1988-08-01 22:28:05	1988-08-02 05:00:00	0.3	7.2	7	1988-08-02 09:00:00	1988-08-03 02:00:00	1988-08-03 19:00:00	23.375	54	27	919528
49	1988-08-02 15:03:19	1988-08-02 16:29:55	1988-08-03 05:00:00	3.59751	17.3	13.3	1988-08-02 20:00:00	1988-08-03 20:59:00	1988-08-04 22:00:00	21.375	137	28	3.28378e+06
50	1988-08-21 13:20:00	1988-08-21 14:50:13	1988-08-21 16:00:00	0.4	1.1	1.4	1988-08-22 12:00:00	1988-08-22 15:55:00	1988-08-22 22:00:00	14.625	18	12	42239.4
51	1988-08-23 05:30:00	1988-08-24 01:52:04	1988-08-24 05:00:00	0.2	4.8	2.5	1988-08-23 08:00:00	1988-08-24 15:54:00	1988-08-24 20:00:00	13.625	19	13	52716.5
52	1988-08-25 05:05:00	1988-08-25 21:24:41	1988-08-26 05:00:00	1.2	28.8	7.3	1988-08-26 07:00:00	1988-08-26 18:54:00	1988-08-27 02:00:00	13.625	367	46	2691930
53	1990-10-07 15:00:00	1990-10-07 15:30:00	1990-10-07 18:00:00	0.1	0.4	4.4	1990-10-07 16:00:00	1990-10-07 23:52:00	1990-10-08 16:00:00	9.8125	11	10	65251.8
54	1990-10-18 12:07:30	1990-10-19 04:30:00	1990-10-19 10:00:00	11.5998	38.2	0	1990-10-19 02:00:00	1990-10-19 10:59:00	1990-10-20 02:00:00	11.625	47	18	932729
55	1991-02-16 13:00:00	1991-02-16 21:27:45	1991-02-17 01:00:00	2.2	11.8	1.5	1991-02-16 14:00:00	1991-02-17	1991-02-17 09:00:00	13.375	21	15	199698
56	1991-02-28 01:00:00	1991-02-28 03:28:50	1991-02-28 05:00:00	0.2	0.9	0	1991-02-28 01:15:00	1991-02-28 01:15:00	1991-02-28 06:00:00	16	16	15	284.211
57	1991-02-28 10:30:00	1991-02-28 12:29:58	1991-02-28 14:00:00	0.699932	1.6	0.9	1991-02-28 14:00:00	1991-02-28 17:00:00	1991-02-28 19:00:00	14.375	16	15	11334.4
58	1991-03-01 11:30:00	1991-03-01 12:00:00	1991-03-01 14:00:00	0.15	0.4	2.5	1991-03-01 12:00:00	1991-03-01 13:00:00	1991-03-02 04:00:00	14.375	15	14	43476
59	1991-03-02 00:30:00	1991-03-02 01:30:03	1991-03-02 05:00:00	0.3999	1.2	2.9	1991-03-02 00:45:00	1991-03-02 00:45:00	1991-03-02 08:00:00	15	15	13	8224.14
60	1991-03-10 06:00:00	1991-03-11 01:57:43	1991-03-11 05:00:00	0.1	2.4	2.4	1991-03-10 06:15:00	1991-03-10 06:15:00	1991-03-11 06:00:00	15	15	13	530.526
61	1991-03-11 12:00:00	1991-03-11 12:30:00	1991-03-11 20:00:00	0.2	0.9	2.4	1991-03-12 10:00:00	1991-03-12 18:00:00	1991-03-13 10:00:00	8.5625	16	8.6875	348032
62	1991-03-13 17:00:00	1991-03-13 20:49:23	1991-03-14 17:00:00	0.4	4	3.3	1991-03-13 17:00:00	1991-03-13 21:00:00	1991-03-14 18:00:00	13.75	16	13	73192.5
63	1991-04-02 22:00:00	1991-04-02 22:30:00	1991-04-03 03:00:00	0.1	0.5	0.8	1991-04-02 22:00:00	1991-04-04 00:25:00	1991-04-04 10:00:00	14.1844	20	18	133187
64	1991-04-12 01:00:00	1991-04-12 03:30:02	1991-04-12 14:00:00	0.5	3	11.5	1991-04-12 01:15:00	1991-04-12 01:24:00	1991-04-12 19:00:00	22	22	20	25.7143
65	1991-05-22 11:00:00	1991-05-22 18:37:39	1991-05-22 21:00:00	0.4	2.6	0.3	1991-05-22 11:00:00	1991-05-22 23:00:00	1991-05-23 01:00:00	67.375	70	67	26515.8
66	1991-06-01 13:00:00	1991-06-01 15:55:29	1991-06-01 17:00:00	0.4	1.5	22.2	1991-06-01 13:15:00	1991-06-01 13:15:00	1991-06-01 18:00:00	72	72	70	6300
67	1991-06-11 06:00:00	1991-06-12 01:57:43	1991-06-12 05:00:00	0.1	2.4	0	1991-06-11 07:00:00	1991-06-13 05:00:00	1991-06-13 10:00:00	114	127	113.75	954114
68	1991-07-05 08:00:00	1991-07-05 08:30:00	1991-07-06 05:00:00	0.1	1.8	0	1991-07-05 08:00:00	1991-07-05 12:00:00	1991-07-06 08:00:00	45.375	47	45	17543
69	1991-07-06 12:00:00	1991-07-06 13:43:26	1991-07-06 18:00:00	0.3	1.1	1.8	1991-07-06 12:15:00	1991-07-06 12:15:00	1991-07-06 22:00:00	45	45	43	20723.1
70	1991-07-31 06:15:00	1991-07-31 09:30:01	1991-07-31 12:00:00	3.69944	10.9	2	1991-07-31 09:00:00	1991-07-31 13:00:00	1991-07-31 16:00:00	20.375	22	20	24344.2
71	1991-08-01 05:12:00	1991-08-01 23:48:04	1991-08-02 05:00:00	0.5	12	12.9	1991-08-01 06:00:00	1991-08-02 21:00:00	1991-08-03 03:00:00	20.75	66	24.375	617322
72	1991-08-25 12:12:00	1991-08-25 20:30:02	1991-08-25 22:00:00	3.89942	10.1	11.2	1991-08-25 18:00:00	1991-08-25 19:00:00	1991-08-26 03:00:00	39.75	86	18	303075
73	1991-08-26 05:30:00	1991-08-26 06:30:03	1991-08-26 20:00:00	1.3992	3.6	21.3	1991-08-27	1991-08-27 14:00:00	1991-08-27 21:00:00	15.375	49	20	196207
74	1991-08-30 06:00:00	1991-08-31 01:57:43	1991-08-31 05:00:00	0.1	2.4	20.5	1991-08-30 09:00:00	1991-08-31 21:00:00	1991-09-02	13.125	20	14	422469
75	1991-09-07 04:00:00	1991-09-07 12:29:57	1991-09-07 18:00:00	1.19972	4.8	12.1	1991-09-07 18:00:00	1991-09-08 07:00:00	1991-09-10 17:00:00	18.75	29	20	1.28712e+06
76	1991-10-22 05:30:00	1991-10-23 21:30:01	1991-10-24 01:00:00	1.89979	20.8	0	1991-10-22 14:00:00	1991-10-23 23:30:00	1991-10-24 12:00:00	13.8125	44	19	599765
77	1991-10-27 01:10:00	1991-10-27 04:29:56	1991-10-27 16:00:00	9.19676	20	20.8	1991-10-27 02:00:00	1991-10-27 13:25:00	1991-10-28 09:00:00	14.9375	23	16	418483
78	1991-10-27 21:00:00	1991-10-28 06:55:13	1991-10-28 16:00:00	0.4	3	40.8	1991-10-27 21:15:00	1991-10-27 21:25:00	1991-10-28 18:00:00	20	20	16	13635
79	1991-10-29 06:00:00	1991-10-30 03:30:00	1991-10-30 05:00:00	0.59995	6.8	23	1991-10-29 09:00:00	1991-10-29 20:22:00	1991-10-31 11:00:00	10.1875	18	10.5	1.32662e+06
80	1991-11-02 01:30:00	1991-11-02 02:00:00	1991-11-02 05:00:00	0.2	0.7	9.8	1991-11-03 01:00:00	1991-11-03 04:46:00	1991-11-03 13:00:00	15.5625	23.5	7.73125	546673
81	1991-11-14 00:04:36	1991-11-14 01:29:54	1991-11-15 05:00:00	3.09711	13.7	0.9	1991-11-14 01:00:00	1991-11-14 19:00:00	1991-11-15 07:00:00	14	16	13	95078.6
82	1991-11-17 12:00:00	1991-11-17 18:30:01	1991-11-18 04:00:00	0.499907	3.9	13.7	1991-11-17 12:00:00	1991-11-17 20:00:00	1991-11-18 13:00:00	8.1875	18	15	350682
83	1991-11-18 16:00:00	1991-11-18 22:10:16	1991-11-19	0.3	1.6	17.6	1991-11-18 19:00:00	1991-11-18 20:00:00	1991-11-19 03:00:00	15.375	16	15	20070.7
84	1992-02-15 15:00:00	1992-02-15 22:52:53	1992-02-16 10:00:00	0.4	3.3	7.3	1992-02-15 17:00:00	1992-02-15 19:00:00	1992-02-16 11:00:00	8.4375	11	8	49058.6
85	1992-02-16 16:00:00	1992-02-16 16:30:00	1992-02-16 22:00:00	0.1	0.7	9.2	1992-02-17 17:00:00	1992-02-17 21:00:00	1992-02-18 01:00:00	7.1875	10	8	36118.5
86	1992-03-07 18:30:00	1992-03-08 04:30:02	1992-03-09 03:00:00	2.19874	10.9	11.2	1992-03-07 21:00:00	1992-03-08 16:00:00	1992-03-09 07:00:00	17.375	24	20	306749
87	1992-03-16 06:00:00	1992-03-17 10:29:57	1992-03-17 15:00:00	0.399922	4.1	0	1992-03-16 17:00:00	1992-03-17 01:00:00	1992-03-17 20:00:00	25.75	32	30	223348
88	1992-03-22 08:00:00	1992-03-22 15:30:02	1992-03-22 19:00:00	0.399936	2.3	2.9	1992-03-22 22:00:00	1992-03-23 14:07:00	1992-03-23 17:00:00	20.375	22	20	48964.9
89	1992-03-26 14:00:00	1992-03-26 16:29:56	1992-03-26 18:00:00	0.299899	0.9	5.3	1992-03-26 21:00:00	1992-03-27 03:13:00	1992-03-27 07:00:00	22.75	27	25	63411.6
90	1992-03-27 09:00:00	1992-03-27 16:29:56	1992-03-28 17:00:00	0.799896	7.7	3.3	1992-03-27 19:00:00	1992-03-29 01:17:00	1992-03-29 13:00:00	25.25	43	33.0625	887594
91	1992-03-29 12:00:00	1992-03-29 13:30:01	1992-03-29 23:00:00	0.499901	2.3	8.7	1992-03-29 14:00:00	1992-03-30 22:50:00	1992-03-31 08:00:00	33.1875	39.5	37	280843
92	1992-03-30 15:00:00	1992-03-30 15:30:00	1992-03-30 20:00:00	0.1	0.4	11	1992-03-30 18:00:00	1992-03-31 01:20:00	1992-03-31 08:00:00	33.1875	43	37	172141
93	1992-04-17 20:00:00	1992-04-17 22:30:02	1992-04-18 02:00:00	0.299934	1.1	0.3	1992-04-17 21:00:00	1992-04-18 09:54:00	1992-04-19	51.125	70	64	783318
94	1992-05-05 13:10:00	1992-05-05 13:40:00	1992-05-05 16:00:00	0.511111	0.8	0	1992-05-05 20:00:00	1992-05-06 04:00:00	1992-05-06 06:00:00	74.375	77	76	14788.1
95	1992-05-08 10:08:34	1992-05-08 11:29:58	1992-05-08 14:00:00	2.99882	7.4	0.8	1992-05-08 11:00:00	1992-05-09 14:00:00	1992-05-09 22:00:00	78	84	82.375	126506
96	1992-05-22 06:00:00	1992-05-22 06:30:00	1992-05-22 11:00:00	0.1	0.3	20.1	1992-05-22 06:15:00	1992-05-22 06:17:00	1992-05-22 15:00:00	66	65.5	61	3169.85
97	1992-05-22 21:00:00	1992-05-22 22:30:01	1992-05-23 01:00:00	0.299967	0.9	20.4	1992-05-22 21:15:00	1992-05-22 21:17:00	1992-05-23 02:00:00	59	59	58	300
98	1992-05-25	1992-05-25 01:30:01	1992-05-25 03:00:00	0.199967	0.5	24	1992-05-25	1992-05-25 00:18:00	1992-05-25 04:00:00	63	63	60	7987.5
99	1992-05-26 11:30:00	1992-05-26 19:30:05	1992-05-26 22:00:00	5.29341	12.3	18.1	1992-05-26 15:00:00	1992-05-26 20:04:00	1992-05-27 20:00:00	63.75	99	90	1.32923e+06
100	1992-07-12 08:12:00	1992-07-12 10:30:00	1992-07-12 21:00:00	1.39997	11.2	10.2	1992-07-12 09:00:00	1992-07-12 16:00:00	1992-07-13	18	97	31	382950
101	1992-07-30 06:00:00	1992-07-31 01:57:43	1992-07-31 05:00:00	0.1	2.4	2.4	1992-07-30 09:00:00	1992-07-30 11:58:00	1992-07-31 09:00:00	6.4125	10	5.85	181693
102	1992-08-10 06:05:00	1992-08-10 06:35:00	1992-08-10 13:00:00	1.18333	2.7	17.4	1992-08-10 10:00:00	1992-08-11 07:51:00	1992-08-11 17:00:00	9.625	12	10	98240.7
103	1992-08-13 13:00:00	1992-08-13 21:29:57	1992-08-13 23:00:00	1.59965	3.7	3.2	1992-08-14 02:00:00	1992-08-14 02:49:00	1992-08-14 13:00:00	12.625	13	12	24061.9
104	1992-08-14 21:00:00	1992-08-14 22:29:19	1992-08-14 23:00:00	0.5	1.1	6.7	1992-08-14 21:15:00	1992-08-14 21:18:00	1992-08-15 21:00:00	12	12	11	36976.6
105	1992-08-21 09:08:34	1992-08-21 10:39:59	1992-08-21 13:00:00	1.4	4.2	1.7	1992-08-22 01:00:00	1992-08-22 02:44:00	1992-08-22 06:00:00	11.875	13	12	11705.9
106	1992-08-30 05:20:00	1992-08-30 11:29:58	1992-08-30 17:00:00	1.69953	7.6	0.4	1992-08-30 08:00:00	1992-08-31 05:00:00	1992-09-01 23:00:00	9.6875	13	10	347879
107	1992-10-28 11:00:00	1992-10-28 13:30:02	1992-10-28 17:00:00	0.299934	1.3	13	1992-10-28 11:00:00	1992-10-28 20:00:00	1992-10-29 02:00:00	12	14	12	39600
108	1992-10-29 07:10:00	1992-10-30 23:29:58	1992-10-31 03:00:00	9.69888	42.6	2.9	1992-10-29 09:00:00	1992-10-30 23:00:00	1992-10-31 15:00:00	13.375	72	22	1.61046e+06
109	1992-10-31 08:00:00	1992-10-31 09:30:01	1992-10-31 13:00:00	0.399934	1.3	45.5	1992-10-31 08:15:00	1992-10-31 08:15:00	1992-10-31 15:00:00	35	34	22	0
110	1992-11-02 03:08:34	1992-11-02 04:29:58	1992-11-03 05:00:00	2.49908	8.6	46.8	1992-11-02 12:00:00	1992-11-02 17:00:00	1992-11-03 06:00:00	15.375	22	18	205964
111	1992-11-04 16:00:00	1992-11-04 16:30:00	1992-11-04 20:00:00	0.1	0.3	9.9	1992-11-04 17:00:00	1992-11-05 03:00:00	1992-11-05 07:00:00	9.5625	17	15	59130.8
112	1992-11-19 22:00:00	1992-11-20 04:30:01	1992-11-20 22:00:00	1.39978	6	0.8	1992-11-20	1992-11-20 08:00:00	1992-11-21 07:00:00	11.375	14	5.4	241949
113	1992-11-21 06:00:00	1992-11-21 08:29:56	1992-11-21 10:00:00	0.299899	0.9	6.8	1992-11-21 10:00:00	1992-11-21 18:00:00	1992-11-22 04:00:00	5.4375	14	5.4	306298
114	1992-11-22 07:00:00	1992-11-22 07:30:00	1992-11-22 09:00:00	0.5	0.7	7.7	1992-11-22 09:00:00	1992-11-22 14:00:00	1992-11-23 06:00:00	5.55	21	11.375	403308
115	1992-11-22 15:00:00	1992-11-22 16:37:26	1992-11-22 19:00:00	0.7	2.1	8.4	1992-11-22 15:15:00	1992-11-22 15:15:00	1992-11-23 06:00:00	18	18	11.375	27823.7
116	1992-11-29 03:00:00	1992-11-29 03:30:00	1992-11-29 05:00:00	0.1	0.3	3.6	1992-11-29 10:00:00	1992-11-30 04:00:00	1992-11-30 06:00:00	7.1625	12	8.75	55123.2
117	1992-12-05 03:30:00	1992-12-05 04:29:57	1992-12-05 07:00:00	0.599732	1.1	0.2	1992-12-05 04:00:00	1992-12-05 19:00:00	1992-12-06 01:00:00	6.9	16	11.375	100119
118	1992-12-27 23:00:00	1992-12-28 04:29:53	1992-12-28 09:00:00	1.59931	8.2	0	1992-12-28 03:00:00	1992-12-28 19:00:00	1992-12-28 22:00:00	8.9875	16	12.75	49632.9
119	1993-01-06 02:00:00	1993-01-07 16:29:57	1993-01-07 22:00:00	1.19992	15.5	7.7	1993-01-06 03:00:00	1993-01-08 14:00:00	1993-01-08 23:00:00	10.6875	14	12.375	54753.5
120	1993-01-10 02:30:00	1993-01-11 06:29:59	1993-01-11 15:00:00	0.799956	10.1	16.5	1993-01-10 11:00:00	1993-01-12 15:00:00	1993-01-12 18:00:00	10.375	24	11	123176
121	1993-01-12 22:00:00	1993-01-13 04:30:01	1993-01-13 10:00:00	0.699876	4.5	11.1	1993-01-12 22:00:00	1993-01-13 15:00:00	1993-01-13 19:00:00	9.5625	24	18	41231.2
122	1993-01-14 01:00:00	1993-01-14 01:30:00	1993-01-14 03:00:00	0.1	0.3	15.6	1993-01-14 01:15:00	1993-01-14 01:15:00	1993-01-14 06:00:00	17	17	15	3232.89
123	1993-01-14 13:00:00	1993-01-14 13:30:00	1993-01-14 21:00:00	0.1	0.6	15.4	1993-01-14 13:00:00	1993-01-14 14:00:00	1993-01-14 22:00:00	15.375	16	14	12262.5
124	1993-01-18 07:00:00	1993-01-18 09:30:02	1993-01-18 12:00:00	0.799868	2.6	18.4	1993-01-18 12:00:00	1993-01-18 16:00:00	1993-01-18 23:00:00	13.375	15	14	36069
125	1993-01-18 19:00:00	1993-01-18 19:30:00	1993-01-19 06:00:00	0.3	1.8	21	1993-01-18 19:15:00	1993-01-18 19:15:00	1993-01-19 08:00:00	15	15	14	1164.71
126	1993-01-29 17:00:00	1993-01-30 21:30:03	1993-02-01 05:00:00	0.699911	12.7	0	1993-01-29 17:00:00	1993-01-29 22:00:00	1993-02-01 06:00:00	9.9375	18	14	690096
127	1993-02-07 02:00:00	1993-02-07 17:29:59	1993-02-07 21:00:00	0.599982	3.4	0	1993-02-08 06:00:00	1993-02-08 16:00:00	1993-02-09 10:00:00	13.375	15	14.375	102118
128	1993-02-08 03:00:00	1993-02-08 03:30:00	1993-02-08 08:00:00	0.2	0.7	3.4	1993-02-08 06:00:00	1993-02-08 22:00:00	1993-02-09 06:00:00	13.375	16	15	60664.5
129	1993-02-08 14:00:00	1993-02-08 23:30:04	1993-02-09 16:00:00	0.5	5.2	4.1	1993-02-08 15:00:00	1993-02-09 18:00:00	1993-02-10 03:00:00	14.375	18	15	156007
130	1993-03-11 01:30:00	1993-03-11 02:30:03	1993-03-11 17:00:00	0.999902	3.3	1.5	1993-03-11 02:00:00	1993-03-11 05:00:00	1993-03-11 18:00:00	40.375	43	39	48861.9
131	1993-03-14 12:00:00	1993-03-14 12:30:00	1993-03-14 16:00:00	0.2	0.7	4.8	1993-03-14 15:00:00	1993-03-14 23:00:00	1993-03-15 11:00:00	27.375	35	31	260422
132	1993-03-17 06:00:00	1993-03-17 07:30:01	1993-03-18 03:00:00	0.999801	4	0.9	1993-03-17 14:00:00	1993-03-18 02:00:00	1993-03-18 14:00:00	50.125	263	67.25	3.2518e+06
133	1993-03-28 11:00:00	1993-03-28 14:30:03	1993-03-29 12:00:00	0.6	7.4	20.2	1993-03-28 14:00:00	1993-03-28 18:00:00	1993-03-29 19:00:00	60.75	88	53	893944
134	1993-05-03 19:00:00	1993-05-04 04:29:58	1993-05-04 22:00:00	6.89819	15.2	2.9	1993-05-03 19:00:00	1993-05-04 09:00:00	1993-05-05 11:00:00	122.125	208	142.625	7.04621e+06
135	1993-05-05 19:00:00	1993-05-05 20:19:53	1993-05-05 23:00:00	0.3	1.1	18.1	1993-05-05 19:00:00	1993-05-05 23:00:00	1993-05-06 02:00:00	138.125	144	137	80232.6
136	1993-05-06 15:00:00	1993-05-07 05:30:04	1993-05-07 12:00:00	1.39884	8.8	19.2	1993-05-06 20:00:00	1993-05-07 09:00:00	1993-05-07 15:00:00	119.125	208	162	1.46957e+06
137	1993-05-08 06:00:00	1993-05-08 07:30:01	1993-05-08 14:00:00	0.399967	2.2	25.1	1993-05-08 08:00:00	1993-05-08 12:00:00	1993-05-08 18:00:00	137	140	137	64800
138	1993-05-12 16:00:00	1993-05-12 16:30:00	1993-05-12 20:00:00	0.1	0.5	2.2	1993-05-12 17:00:00	1993-05-13 18:00:00	1993-05-15 18:00:00	172.5	237	211.375	1.17194e+07
139	1993-05-14 18:00:00	1993-05-14 19:30:01	1993-05-14 22:00:00	0.699901	1.9	1.2	1993-05-14 19:00:00	1993-05-15 09:00:00	1993-05-15 12:00:00	228.875	280	262.125	394313
140	1993-05-15 13:00:00	1993-05-15 16:29:57	1993-05-17	1.69979	16.8	3.1	1993-05-15 13:00:00	1993-05-18	1993-05-18 16:00:00	264.875	286	277.75	1061454
141	1993-06-08 04:00:00	1993-06-08 05:29:55	1993-06-08 06:00:00	0.133155	0.3	18.7	1993-06-08 04:15:00	1993-06-08 04:15:00	1993-06-08 07:00:00	137	137	134	1779.55
142	1993-07-23 19:30:00	1993-07-23 22:29:53	1993-07-24 01:00:00	4.39785	12.9	0	1993-07-23 22:00:00	1993-07-24 07:00:00	1993-07-24 18:00:00	48.125	62	49	525554
143	1993-10-06 10:00:00	1993-10-06 11:30:37	1993-10-06 19:00:00	0.3	1.8	3.5	1993-10-06 10:00:00	1993-10-07 04:54:00	1993-10-07 10:00:00	12	14	12	23400
144	1993-10-07 06:00:00	1993-10-08 11:32:04	1993-10-08 18:00:00	0.4	5	5.3	1993-10-07 07:00:00	1993-10-08 20:54:00	1993-10-10 17:00:00	13.375	19	12	773380
145	1993-11-10 05:30:00	1993-11-11 18:29:58	1993-11-12 01:00:00	1.09995	12.4	0	1993-11-10 18:00:00	1993-11-12 02:15:00	1993-11-12 07:00:00	15	19	17	45255.4
146	1993-11-12 12:00:00	1993-11-12 15:10:19	1993-11-13 04:00:00	0.4	3.7	12.4	1993-11-12 20:00:00	1993-11-12 20:30:00	1993-11-13 05:00:00	17.25	18	17	18481.3
147	1993-11-21 21:30:00	1993-11-21 22:29:57	1993-11-22	0.299933	0.7	0	1993-11-21 22:00:00	1993-11-22 00:45:00	1993-11-22 05:00:00	13	28	20	103725
148	1993-12-11 23:06:39	1993-12-12 02:29:59	1993-12-12 10:00:00	4.3	15.4	0	1993-12-11 23:21:39	1993-12-12	1993-12-12 12:00:00	14	18	15.25	30847.5
149	1993-12-23 03:00:00	1993-12-23 04:29:55	1993-12-23 05:00:00	0.299866	0.6	0	1993-12-23 12:00:00	1993-12-23 21:30:00	1993-12-24	10.75	14	12	18478.1
150	1993-12-26 18:30:00	1993-12-26 19:30:03	1993-12-26 22:00:00	0.4998	1.1	0.6	1993-12-26 19:00:00	1993-12-27 08:30:00	1993-12-27 11:00:00	15	17	15	34200
151	1993-12-28 12:00:00	1993-12-28 12:30:00	1993-12-28 16:00:00	0.1	0.5	4.2	1993-12-28 13:00:00	1993-12-28 13:45:00	1993-12-29 03:00:00	15.25	16	15.75	6324.11
152	1994-01-29 05:20:00	1994-01-29 08:44:56	1994-01-29 10:00:00	0.349898	1.1	3.1	1994-01-29 09:00:00	1994-01-29 19:00:00	1994-01-29 23:00:00	11.5	20	14.75	55542.9
153	1994-01-29 22:20:00	1994-01-29 23:29:58	1994-01-30 15:00:00	0.399966	2.6	4.2	1994-01-29 22:35:00	1994-01-29 22:45:00	1994-01-31 08:00:00	15	15	1.7	442800
154	1994-02-07 17:30:00	1994-02-07 21:22:12	1994-02-08 18:00:00	1.2	9.4	0.9	1994-02-07 17:45:00	1994-02-07 21:00:00	1994-02-08 20:00:00	16	17	15	16594.3
155	1994-02-11 03:00:00	1994-02-11 04:30:01	1994-02-11 10:00:00	1.69957	3.8	12.9	1994-02-11 10:00:00	1994-02-11 10:15:00	1994-02-11 14:00:00	15.25	16	14.75	871.875
156	1994-02-12 05:08:34	1994-02-12 06:12:02	1994-02-12 09:00:00	0.7	2.2	16.7	1994-02-12 09:00:00	1994-02-12 11:30:00	1994-02-12 14:00:00	8.5	21	13	50265
157	1994-02-17 23:08:34	1994-02-18 00:30:04	1994-02-18 18:00:00	1.89964	7.6	3	1994-02-17 23:23:34	1994-02-17 23:30:00	1994-02-18 19:00:00	26	26	15.75	2737.5
158	1994-03-11 11:00:00	1994-03-11 22:30:01	1994-03-12 05:00:00	1.09988	8.9	3.8	1994-03-11 12:00:00	1994-03-11 18:30:00	1994-03-12 06:00:00	18	26	19	220238
159	1994-03-19 22:30:00	1994-03-20 01:30:05	1994-03-20 08:00:00	0.999332	4.8	0.8	1994-03-19 23:00:00	1994-03-20 02:15:00	1994-03-20 09:00:00	29	31	28	48172.5
160	1994-04-10 02:00:00	1994-04-10 09:30:02	1994-04-10 17:00:00	0.2	2.1	28.1	1994-04-10 02:15:00	1994-04-10 02:15:00	1994-04-11 05:00:00	38	39	33	76108.9
161	1994-04-11	1994-04-11 00:30:00	1994-04-11 11:00:00	0.1	0.9	29.2	1994-04-11	1994-04-12 00:30:00	1994-04-12 13:00:00	38	52	36.75	481190
162	1994-05-12 23:00:00	1994-05-13 00:30:01	1994-05-13 02:00:00	0.599901	1.3	0.4	1994-05-12 23:00:00	1994-05-14 02:00:00	1994-05-14 17:00:00	72.75	97	90.5	907978
163	1994-05-31 02:30:00	1994-05-31 04:29:58	1994-05-31 07:00:00	0.599966	1.5	0.7	1994-05-31 04:00:00	1994-06-01 05:30:00	1994-06-01 21:00:00	99.25	124	103.75	1.62015e+06
164	1994-07-29 05:07:30	1994-07-29 05:37:30	1994-07-29 07:00:00	0.787549	1.5	1	1994-07-29 05:22:30	1994-07-30 02:00:00	1994-08-02 14:00:00	16	17	15.75	635400
165	1994-07-30 13:00:00	1994-07-30 13:30:00	1994-07-30 16:00:00	0.1	0.4	2.5	1994-07-30 15:00:00	1994-07-30 17:00:00	1994-07-30 20:00:00	17.75	21	18.25	20002.5
166	1994-08-08 10:30:00	1994-08-09 05:30:00	1994-08-09 16:00:00	0.999843	9.7	0.1	1994-08-08 13:00:00	1994-08-08 13:45:00	1994-08-09 17:00:00	15	17	14	84278.6
167	1994-08-10 06:00:00	1994-08-11 13:45:02	1994-08-13 05:00:00	0.3	15.1	9.8	1994-08-10 08:00:00	1994-08-13 03:45:00	1994-08-24 19:00:00	16	20	7.9	1.43981e+06
168	1994-09-16 14:00:00	1994-09-16 14:30:00	1994-09-16 16:00:00	0.2	0.5	0	1994-09-16 19:00:00	1994-09-17 09:00:00	1994-09-17 19:00:00	8.5	10	7.9	64833.8
169	1994-11-01 06:00:00	1994-11-02 01:57:43	1994-11-02 05:00:00	0.1	2.4	0	1994-11-01 11:00:00	1994-11-02 21:30:00	1994-11-02 23:00:00	17	20	19	3325
170	1994-11-02 10:00:00	1994-11-02 13:29:57	1994-11-03 19:00:00	1.19962	13.5	2.4	1994-11-02 11:00:00	1994-11-04 17:00:00	1994-11-04 22:00:00	15.75	23	19	180877
171	1994-11-16 15:00:00	1994-11-16 18:29:57	1994-11-17 02:00:00	1.3998	5.6	10.4	1994-11-16 16:00:00	1994-11-16 16:45:00	1994-11-17 07:00:00	20.25	21	11	129038
172	1994-11-17 09:00:00	1994-11-17 11:28:50	1994-11-17 13:00:00	0.2	0.8	16	1994-11-17 09:00:00	1994-11-17 18:30:00	1994-11-17 23:00:00	12.25	21	18.75	63988.4
173	1994-11-17 21:00:00	1994-11-18 01:30:04	1994-11-19 13:00:00	1.3996	13.3	6.6	1994-11-17 21:15:00	1994-11-17 21:15:00	1994-11-19 22:00:00	20	20	11.25	178434
174	1994-11-20 22:00:00	1994-11-21 00:28:50	1994-11-21 02:00:00	0.2	0.8	19.7	1994-11-20 22:15:00	1994-11-20 22:15:00	1994-11-21 09:00:00	22	22	17.25	732.558
175	1994-11-27 23:00:00	1994-11-28 04:29:59	1994-11-28 07:00:00	0.399996	1.4	9.9	1994-11-27 23:15:00	1994-11-27 23:15:00	1994-11-28 09:00:00	20	19	15.75	126.923
176	1995-01-05 07:00:00	1995-01-05 15:48:05	1995-01-06	0.5	4.4	2.2	1995-01-05 08:00:00	1995-01-05 17:15:00	1995-01-06 05:00:00	15.5	18	16	45460.7
177	1995-01-06 06:00:00	1995-01-06 08:58:59	1995-01-06 10:00:00	0.2	0.8	6.5	1995-01-06 12:00:00	1995-01-06 14:00:00	1995-01-06 16:00:00	15.5	17	16	3543.75
178	1995-01-07 10:00:00	1995-01-07 10:30:00	1995-01-07 16:00:00	0.1	0.5	7.3	1995-01-07 10:15:00	1995-01-07 10:45:00	1995-01-07 17:00:00	15	16	15	9900
179	1995-01-17 12:00:00	1995-01-17 12:30:00	1995-01-17 14:00:00	0.3	0.5	7.8	1995-01-17 12:00:00	1995-01-17 18:00:00	1995-01-18 09:00:00	11.75	19	3.05	224534
180	1995-02-28 11:06:00	1995-02-28 12:30:00	1995-02-28 20:00:00	1.89993	8	2.4	1995-02-28 14:00:00	1995-02-28 23:00:00	1995-03-01 10:00:00	36	54	40.75	252323
181	1995-03-01 05:00:00	1995-03-01 13:15:07	1995-03-01 18:00:00	0.6	4.2	10.4	1995-03-01 07:00:00	1995-03-02 02:30:00	1995-03-02 08:00:00	44.25	67	42.5	239474
182	1995-03-02 04:00:00	1995-03-02 05:30:01	1995-03-02 12:00:00	0.299967	1.4	14.6	1995-03-02 04:00:00	1995-03-03 06:45:00	1995-03-03 09:00:00	47	64	36.5	170092
183	1995-03-05 01:15:00	1995-03-05 03:29:54	1995-03-06 02:00:00	1.0996	9.9	20.1	1995-03-05 04:00:00	1995-03-05 04:15:00	1995-03-06 05:00:00	49.75	74	43.25	233042
184	1995-03-10 08:00:00	1995-03-10 08:30:00	1995-03-10 12:00:00	0.1	0.4	9.9	1995-03-10 09:00:00	1995-03-11 01:30:00	1995-03-11 09:00:00	40.75	92	59.25	498455
185	1995-03-19 09:30:00	1995-03-19 10:00:00	1995-03-19 11:00:00	0.15	0.3	0.9	1995-03-19 10:00:00	1995-03-19 11:15:00	1995-03-19 17:00:00	61.25	63	57.25	34425
186	1995-03-21 17:00:00	1995-03-21 18:30:01	1995-03-21 21:00:00	0.799868	2	1.3	1995-03-21 20:00:00	1995-03-21 23:15:00	1995-03-22 11:00:00	59	69	58	278535
187	1995-04-20 10:00:00	1995-04-21 02:08:10	1995-04-21 22:00:00	0.3	5.8	16.2	1995-04-20 12:00:00	1995-04-20 21:00:00	1995-04-22 02:00:00	87.75	96	86.25	193023
188	1995-04-22 09:00:00	1995-04-22 12:28:39	1995-04-22 17:00:00	0.2	1	20	1995-04-22 10:00:00	1995-04-22 21:45:00	1995-04-22 23:00:00	82.5	88	85.5	12928.8
189	1995-04-30 09:00:00	1995-04-30 09:30:00	1995-04-30 12:00:00	0.1	0.4	3	1995-04-30 09:00:00	1995-04-30 09:45:00	1995-04-30 16:00:00	174.5	177	162.25	49725
190	1995-05-01 11:15:00	1995-05-01 12:29:59	1995-05-01 14:00:00	0.499983	1.3	4.8	1995-05-01 17:00:00	1995-05-01 22:30:00	1995-05-07 13:00:00	151.25	168	155.75	2.64141e+07
191	1995-05-01 19:02:43	1995-05-02 04:29:53	1995-05-02 15:00:00	5.09563	25.2	6.1	1995-05-01 20:00:00	1995-05-03 00:30:00	1995-05-03 11:00:00	152.25	329	281.75	2.68189e+06
192	1995-05-07 01:00:00	1995-05-07 01:30:00	1995-05-07 05:00:00	0.2	0.5	30.4	1995-05-07 01:00:00	1995-05-07 01:15:00	1995-05-07 06:00:00	177.5	181	171	6390
193	1995-05-07 22:00:00	1995-05-08 05:30:02	1995-05-08 11:00:00	0.2	1.9	3	1995-05-07 22:00:00	1995-05-08 00:30:00	1995-05-08 17:00:00	161	170	154	383471
194	1995-05-10 09:30:00	1995-05-10 11:32:53	1995-05-10 15:00:00	1	4	4.9	1995-05-10 10:00:00	1995-05-11 03:00:00	1995-05-11 05:00:00	150.75	175	168	30523
195	1995-05-11 10:00:00	1995-05-11 19:29:58	1995-05-13 15:00:00	3.49894	26	7.9	1995-05-11 11:00:00	1995-05-12 06:00:00	1995-05-13 17:00:00	165.25	294	223	8.87709e+06
196	1995-05-16 10:00:00	1995-05-16 13:29:57	1995-05-16 17:00:00	0.599796	1.6	28.7	1995-05-16 10:00:00	1995-05-16 23:00:00	1995-05-17 06:00:00	186.5	198	182	182357
197	1995-05-17 03:00:00	1995-05-17 03:30:00	1995-05-17 05:00:00	0.1	0.3	30.4	1995-05-17 03:15:00	1995-05-17 03:30:00	1995-05-17 06:00:00	193	193	182	9900
198	1995-05-23 12:00:00	1995-05-23 16:29:58	1995-05-23 20:00:00	1.99979	6.3	6.2	1995-05-23 13:00:00	1995-05-24 01:30:00	1995-05-24 05:00:00	262	324	281.5	810021
199	1995-06-01 17:00:00	1995-06-01 19:30:02	1995-06-02 17:00:00	1.19922	12.9	2.6	1995-06-03 01:00:00	1995-06-03 16:45:00	1995-06-03 22:00:00	330	394	367	451854
200	1995-06-17 09:00:00	1995-06-17 13:12:38	1995-06-17 17:00:00	0.3	1.7	2	1995-06-17 09:00:00	1995-06-17 09:30:00	1995-06-17 20:00:00	278.25	294	240.75	245250
201	1995-10-30 06:00:00	1995-10-31 01:57:43	1995-10-31 05:00:00	0.1	2.4	0	1995-10-30 18:00:00	1995-11-01 02:15:00	1995-11-01 16:00:00	15.75	20	17.75	157162
202	1995-10-31 21:00:00	1995-11-01 00:30:03	1995-11-01 05:00:00	1.3997	4.4	2.4	1995-10-31 21:00:00	1995-11-01 05:45:00	1995-11-01 16:00:00	17	21	17.75	138849
203	1995-11-09 18:00:00	1995-11-10 04:29:59	1995-11-10 05:00:00	0.199996	1	0	1995-11-10 02:00:00	1995-11-10 10:30:00	1995-11-10 18:00:00	16.75	19	17.5	21881.2
204	1995-11-26 11:00:00	1995-11-26 12:30:01	1995-11-26 16:00:00	0.499934	1.4	2.4	1995-11-26 11:00:00	1995-11-27 15:45:00	1995-11-27 17:00:00	16.5	20	19	66637.5
205	1996-01-16 14:20:00	1996-01-16 16:29:53	1996-01-17 08:00:00	2.39798	12.7	0	1996-01-16 16:00:00	1996-01-17 06:30:00	1996-01-17 11:00:00	15	19	17.75	39730.3
206	1996-01-18 16:30:00	1996-01-18 17:29:57	1996-01-18 20:00:00	0.299933	0.8	12.7	1996-01-18 17:00:00	1996-01-18 21:45:00	1996-01-18 23:00:00	14.75	21	19	24309.4
207	1996-01-19 05:00:00	1996-01-19 07:28:50	1996-01-19 15:00:00	0.2	1.4	13.5	1996-01-19 08:00:00	1996-01-19 19:15:00	1996-01-20 10:00:00	16	21	8.7	364065
208	1996-01-21 18:00:00	1996-01-22 02:29:57	1996-01-22 15:00:00	1.59993	15.2	14.9	1996-01-21 18:00:00	1996-01-21 18:15:00	1996-01-22 18:00:00	20.75	21	17.5	1891.41
209	1996-01-25 00:15:00	1996-01-25 01:29:59	1996-01-25 05:00:00	1.19986	4	16.6	1996-01-25 00:30:00	1996-01-25 00:30:00	1996-01-25 07:00:00	17	17	14.25	7459.62
210	1996-01-25 11:00:00	1996-01-25 11:30:00	1996-01-25 17:00:00	0.1	0.7	19.2	1996-01-25 11:00:00	1996-01-26 12:00:00	1996-01-26 15:00:00	14.75	22	9	105770
211	1996-01-28 01:30:00	1996-01-28 04:29:59	1996-01-28 05:00:00	0.599999	1.8	4.7	1996-01-28 01:45:00	1996-01-28 01:45:00	1996-01-28 08:00:00	19	18	16	792
212	1996-01-30 11:00:00	1996-01-31 13:30:00	1996-02-01 11:00:00	0.5	7.7	7	1996-01-30 11:15:00	1996-01-30 11:15:00	1996-02-01 15:00:00	16	17	16.25	85076.1
213	1996-02-02 05:00:00	1996-02-02 05:30:00	1996-02-02 09:00:00	0.2	0.6	10	1996-02-02 05:00:00	1996-02-02 05:30:00	1996-02-02 10:00:00	16.5	17	16	1462.5
214	1996-02-04 16:00:00	1996-02-04 16:30:00	1996-02-04 18:00:00	0.1	0.3	8.8	1996-02-04 17:00:00	1996-02-04 20:15:00	1996-02-05 03:00:00	18.25	25	19	125904
215	1996-02-20 01:30:00	1996-02-20 16:30:02	1996-02-21 04:00:00	1.39994	12.3	0.7	1996-02-20 05:00:00	1996-02-21 03:30:00	1996-02-21 12:00:00	17.25	33	26	309428
216	1996-02-21 14:00:00	1996-02-21 17:59:49	1996-02-21 20:00:00	0.5	2.3	13	1996-02-21 18:00:00	1996-02-21 22:15:00	1996-02-22	25.25	27	26	5934.38
217	1996-02-22 03:30:00	1996-02-22 11:00:26	1996-02-22 17:00:00	0.3	2.5	15.3	1996-02-22 03:45:00	1996-02-22 03:45:00	1996-02-22 18:00:00	25	25	23	2573.68
218	1996-03-05 14:00:00	1996-03-05 19:29:59	1996-03-05 23:00:00	0.799996	2.9	2.1	1996-03-05 14:00:00	1996-03-06 00:15:00	1996-03-06 04:00:00	19	22	18.25	77400
219	1996-03-06 06:00:00	1996-03-06 06:30:00	1996-03-06 10:00:00	0.2	0.7	5	1996-03-06 11:00:00	1996-03-06 19:15:00	1996-03-07 07:00:00	16.75	20	6.625	367085
220	1996-03-22 22:00:00	1996-03-23 04:30:01	1996-03-23 16:00:00	1.39969	4.8	0	1996-03-22 22:00:00	1996-03-23 14:15:00	1996-03-23 23:00:00	20.25	26	23.25	178794
221	1996-03-28 21:30:00	1996-03-28 22:30:03	1996-03-29 14:00:00	1.1	5	6.2	1996-03-29 01:00:00	1996-03-29 01:15:00	1996-03-29 18:00:00	28.5	29	25	33670.6
222	1996-07-08 03:00:00	1996-07-08 04:30:01	1996-07-08 06:00:00	0.499868	1	0.5	1996-07-08 03:00:00	1996-07-09 03:30:00	1996-07-11 02:00:00	17.5	21	16.25	431703
223	1996-07-08 13:00:00	1996-07-08 13:30:00	1996-07-08 15:00:00	0.2	0.4	1.5	1996-07-08 23:00:00	1996-07-09 06:30:00	1996-07-09 15:00:00	20	22	20	37350
224	1996-07-14 06:00:00	1996-07-15 01:57:43	1996-07-15 05:00:00	0.1	2.4	0.8	1996-07-16 02:00:00	1996-07-16 04:00:00	1996-07-18 04:00:00	17	18	15	265604
225	1996-07-15 19:30:00	1996-07-15 20:30:45	1996-07-15 23:00:00	1	2.5	2.4	1996-07-16 02:00:00	1996-07-16 14:45:00	1996-07-18 04:00:00	17	22	15	265604
226	1996-07-28 10:00:00	1996-07-28 12:29:56	1996-07-28 13:00:00	0.199899	0.5	1	1996-07-28 10:00:00	1996-07-28 11:00:00	1996-07-28 19:00:00	13.75	15	14	12937.5
227	1996-07-28 19:12:00	1996-07-28 20:29:59	1996-07-28 22:00:00	0.599993	1.4	1.5	1996-07-29 02:00:00	1996-07-29 02:45:00	1996-07-29 19:00:00	14.25	15	13	65961.4
228	1996-09-13 19:00:00	1996-09-13 19:30:18	1996-09-13 23:00:00	0.4	1.3	5	1996-09-13 19:15:00	1996-09-13 19:15:00	1996-09-15 03:00:00	10	10	9.7	1624.35
229	1996-09-14 04:00:00	1996-09-14 04:30:00	1996-09-14 07:00:00	0.1	0.4	6.3	1996-09-14 04:15:00	1996-09-15	1996-09-15 03:00:00	10	10	9.7	742.5
230	1996-10-19 11:00:00	1996-10-19 18:30:02	1996-10-19 23:00:00	0.299936	1.8	2.4	1996-10-19 11:00:00	1996-10-20 06:30:00	1996-10-20 17:00:00	12	14	12	61200
231	1996-10-25 22:00:00	1996-10-25 23:30:01	1996-10-26 02:00:00	0.199967	0.6	9.4	1996-10-25 22:15:00	1996-10-25 22:30:00	1996-10-26 03:00:00	15	15	14	521.053
232	1996-10-26 12:00:00	1996-10-26 13:30:07	1996-10-26 17:00:00	0.2	0.8	10	1996-10-26 19:00:00	1996-10-26 19:15:00	1996-10-26 21:00:00	14.25	15	14	703.125
233	1996-10-27 13:00:00	1996-10-27 13:30:00	1996-10-27 16:00:00	0.2	0.5	11.1	1996-10-27 13:15:00	1996-10-28 00:15:00	1996-10-28 04:00:00	14	15	14	10800
234	1996-10-27 21:00:00	1996-10-27 21:30:00	1996-10-28 03:00:00	0.1	0.4	11.6	1996-10-28 01:00:00	1996-10-28 18:45:00	1996-10-28 21:00:00	15	16	15	3600
235	1996-11-21 15:00:00	1996-11-21 19:29:58	1996-11-23 01:00:00	2.59928	20.1	3.6	1996-11-21 15:00:00	1996-11-22 09:45:00	1996-11-23 11:00:00	13	72	23	1903275
236	1996-11-23 06:30:00	1996-11-23 07:00:00	1996-11-23 10:00:00	0.2	0.7	20.1	1996-11-23 06:45:00	1996-11-23 06:45:00	1996-11-23 11:00:00	25	25	23	2911.76
237	1996-12-09 22:00:00	1996-12-09 23:30:01	1996-12-10 05:00:00	0.399934	1.1	2	1996-12-10 02:00:00	1996-12-10 07:15:00	1996-12-10 15:00:00	16.5	22	18.25	83648.1
238	1997-01-02 14:00:00	1997-01-02 22:29:57	1997-01-03 12:00:00	4.99811	26	1.4	1997-01-02 19:00:00	1997-01-03 14:15:00	1997-01-03 21:00:00	14.25	37	30	483051
239	1997-01-03 18:00:00	1997-01-03 19:43:26	1997-01-03 23:00:00	0.3	1.2	26.1	1997-01-03 18:15:00	1997-01-03 18:15:00	1997-01-04 09:00:00	33	33	23	13896.6
240	1997-01-22 11:00:00	1997-01-22 11:30:00	1997-01-22 15:00:00	0.1	0.5	1.5	1997-01-22 11:00:00	1997-01-22 18:15:00	1997-01-22 20:00:00	15.75	17	16	2631.25
241	1997-01-22 23:00:00	1997-01-23 04:29:53	1997-01-23 20:00:00	1.59931	7.9	2	1997-01-23 03:00:00	1997-01-24 18:15:00	1997-01-24 22:00:00	16	22	16	69300
242	1997-01-25 06:00:00	1997-01-25 10:29:58	1997-01-25 13:00:00	0.399965	2	9.9	1997-01-25 07:00:00	1997-01-25 20:00:00	1997-01-26 01:00:00	15.5	19	17.25	25593.8
243	1997-01-28 13:00:00	1997-01-28 19:10:16	1997-01-29 05:00:00	0.3	2	12.3	1997-01-28 13:15:00	1997-01-28 15:00:00	1997-01-29 06:00:00	15	16	15	4500
244	1997-03-03 16:00:00	1997-03-04 00:30:03	1997-03-04 04:00:00	0.5	3.8	13.3	1997-03-03 16:00:00	1997-03-03 16:15:00	1997-03-04 07:00:00	21	22	14	2805
245	1997-04-20 20:00:00	1997-04-20 21:29:55	1997-04-20 22:00:00	0.399598	0.6	0	1997-04-20 20:00:00	1997-04-21 02:30:00	1997-04-21 16:00:00	76	95	87.75	453639
246	1997-04-23 01:00:00	1997-04-23 04:29:57	1997-04-25 04:00:00	3.79932	22.6	1.1	1997-04-23 05:00:00	1997-04-25 21:15:00	1997-04-28 12:00:00	95.5	109	105.5	472615
247	1997-05-25 07:00:00	1997-05-25 07:30:00	1997-05-25 17:00:00	0.3	1.8	18.3	1997-05-25 07:15:00	1997-05-26 00:15:00	1997-05-26 04:00:00	149	161	146	73912.5
248	1997-07-26 16:00:00	1997-07-26 21:29:59	1997-07-26 22:00:00	0.199998	0.7	5.3	1997-07-27 01:00:00	1997-07-27 09:15:00	1997-08-01 19:00:00	22.25	25	22.75	2.2344e+06
249	1997-07-27 11:00:00	1997-07-27 11:30:00	1997-07-28 19:00:00	3	15	6	1997-07-27 11:00:00	1997-07-28 21:45:00	1997-07-29 19:00:00	24.75	39	25.75	592642
250	1997-07-29 15:06:39	1997-07-29 16:29:57	1997-07-29 18:00:00	2.89838	3.9	16.6	1997-07-29 15:21:39	1997-07-29 15:30:00	1997-07-29 19:00:00	28	29	25.75	5882.14
251	1997-07-30 15:30:00	1997-07-30 16:00:00	1997-07-30 17:00:00	0.2	0.4	19.6	1997-07-30 18:00:00	1997-07-30 21:45:00	1997-07-31 03:00:00	26.25	40	28	86406.3
252	1997-08-03 11:00:00	1997-08-04 01:29:58	1997-08-04 18:00:00	2.39992	15.7	4.8	1997-08-03 12:00:00	1997-08-04 13:45:00	1997-08-05 20:00:00	23	32	22.75	562039
253	1997-08-09 15:04:00	1997-08-09 16:30:00	1997-08-10 01:00:00	2.49965	8.9	0.7	1997-08-09 17:00:00	1997-08-10 03:30:00	1997-08-10 20:00:00	21.75	24	22	108675
254	1997-08-31 06:00:00	1997-08-31 06:30:00	1997-08-31 12:00:00	0.1	0.7	2.7	1997-08-31 06:15:00	1997-08-31 06:30:00	1997-08-31 20:00:00	17	17	16	21845.5
255	1997-09-01 21:00:00	1997-09-01 23:58:59	1997-09-02 05:00:00	0.2	1.1	4.9	1997-09-01 21:00:00	1997-09-02 04:15:00	1997-09-02 16:00:00	16.5	18	16.75	33655.3
256	1997-10-02 13:12:00	1997-10-02 16:34:38	1997-10-02 20:00:00	1.36096	3.2	2.4	1997-10-02 14:00:00	1997-10-03 00:30:00	1997-10-03 10:00:00	21.25	38	22	299135
257	1997-11-16	1997-11-16 01:29:55	1997-11-16 02:00:00	0.199866	0.4	6.8	1997-11-16	1997-11-16 21:15:00	1997-11-17 02:00:00	17	19	17	26100
258	1997-11-26 21:10:00	1997-11-26 23:30:01	1997-11-27 23:00:00	3.69933	15.3	0.1	1997-11-26 22:00:00	1997-11-27 00:45:00	1997-11-28 03:00:00	19	22	20.5	112104
259	1997-12-02 05:30:00	1997-12-02 06:00:00	1997-12-02 16:00:00	0.2	1.5	16.5	1997-12-02 05:45:00	1997-12-02 05:45:00	1997-12-02 21:00:00	19	19	18.75	4859.63
260	1997-12-04 06:00:00	1997-12-05 01:57:43	1997-12-05 05:00:00	0.1	2.4	3.1	1997-12-04 10:00:00	1997-12-05 18:15:00	1997-12-06 02:00:00	4.825	38	18.75	283616
261	1997-12-06 17:00:00	1997-12-06 17:30:00	1997-12-06 19:00:00	0.1	0.3	4.3	1997-12-06 17:00:00	1997-12-06 17:15:00	1997-12-06 20:00:00	24.5	25	23	1012.5
262	1997-12-09 17:00:00	1997-12-09 17:30:00	1997-12-09 22:00:00	0.1	0.6	11.4	1997-12-09 17:00:00	1997-12-09 17:15:00	1997-12-10 06:00:00	17	17	11	19453.8
263	1997-12-18 21:00:00	1997-12-18 21:30:00	1997-12-19 04:00:00	0.2	1	0	1997-12-18 21:00:00	1997-12-18 21:15:00	1997-12-19 05:00:00	17.25	18	17	682.031
264	1998-01-04 13:00:00	1998-01-04 15:30:02	1998-01-04 20:00:00	0.599934	2.4	0.6	1998-01-04 16:00:00	1998-01-04 17:00:00	1998-01-04 22:00:00	17.25	22	18	27196.9
265	1998-01-05 01:00:00	1998-01-05 03:30:02	1998-01-05 14:00:00	2.39954	7.4	2.8	1998-01-05 01:00:00	1998-01-05 10:15:00	1998-01-05 15:00:00	19	20	15	40371.4
266	1998-01-09 18:00:00	1998-01-09 19:30:01	1998-01-09 22:00:00	0.599901	1.6	9.8	1998-01-09 21:00:00	1998-01-10 15:30:00	1998-01-11 02:00:00	20	22	20	72900
267	1998-01-19 08:00:00	1998-01-19 12:29:58	1998-01-19 15:00:00	0.69993	2.3	5	1998-01-19 08:00:00	1998-01-19 09:30:00	1998-01-19 17:00:00	19	20	19	20700
268	1998-02-01 18:00:00	1998-02-01 18:30:00	1998-02-01 20:00:00	0.2	0.5	0.9	1998-02-01 18:00:00	1998-02-01 19:45:00	1998-02-02 01:00:00	15.25	30	22	170413
269	1998-02-02 02:00:00	1998-02-02 06:29:58	1998-02-02 08:00:00	0.299965	0.7	1.4	1998-02-02 02:15:00	1998-02-02 02:15:00	1998-02-02 13:00:00	22	22	17	6697.67
270	1998-02-02 14:00:00	1998-02-02 19:30:05	1998-02-02 23:00:00	0.2	1.2	2.1	1998-02-02 17:00:00	1998-02-03 15:45:00	1998-02-03 21:00:00	17.25	20	19	29137.5
271	1998-02-04 11:00:00	1998-02-04 14:25:08	1998-02-04 20:00:00	0.4	2.4	5.7	1998-02-04 15:00:00	1998-02-04 18:15:00	1998-02-05 01:00:00	18	22	19	72787.5
272	1998-02-05 06:00:00	1998-02-05 06:30:00	1998-02-05 10:00:00	0.3	0.8	7.5	1998-02-05 14:00:00	1998-02-05 14:30:00	1998-02-05 17:00:00	18.5	19	18.75	3150
273	1998-02-06 22:00:00	1998-02-07 05:30:02	1998-02-07 11:00:00	2.19904	5	8	1998-02-06 22:15:00	1998-02-06 22:15:00	1998-02-08 06:00:00	17	17	16	4354.84
274	1998-02-08 09:00:00	1998-02-08 12:28:39	1998-02-08 15:00:00	0.2	1	11.9	1998-02-08 17:00:00	1998-02-08 17:15:00	1998-02-08 20:00:00	16.25	17	16.5	1800
275	1998-02-12 19:00:00	1998-02-13 07:29:56	1998-02-13 11:00:00	0.499895	2.5	6.6	1998-02-12 19:15:00	1998-02-12 19:15:00	1998-02-13 16:00:00	30	28	16.5	225
276	1998-03-17 15:00:00	1998-03-17 16:30:01	1998-03-17 19:00:00	0.799752	1.2	0.1	1998-03-17 15:00:00	1998-03-17 22:00:00	1998-03-18 05:00:00	33.25	42	28	261928
277	1998-04-17 23:00:00	1998-04-17 23:30:00	1998-04-18 02:00:00	0.3	0.7	11.7	1998-04-18 02:00:00	1998-04-19 01:15:00	1998-04-19 04:00:00	55.75	61	59.25	24027.4
278	1998-06-12 20:00:00	1998-06-12 21:30:01	1998-06-13 08:00:00	0.499934	2	28.6	1998-06-12 21:00:00	1998-06-13 17:30:00	1998-06-13 19:00:00	147.5	164	158.25	246441
279	1998-06-16 14:00:00	1998-06-16 17:29:57	1998-06-16 23:00:00	2.59915	11.2	16.6	1998-06-16 14:15:00	1998-06-17 00:45:00	1998-06-17 04:00:00	227	234	205	41962.5
280	1998-06-17 05:30:00	1998-06-18 00:30:12	1998-06-18 05:00:00	0.3	5.8	21.4	1998-06-17 07:00:00	1998-06-17 07:15:00	1998-06-18 11:00:00	206.75	211	177	542841
281	1998-07-20 14:12:00	1998-07-20 14:42:00	1998-07-20 19:00:00	0.42	0.9	0	1998-07-20 17:00:00	1998-07-20 19:00:00	1998-07-21	50.75	80	54.75	157870
282	1998-07-21 16:20:00	1998-07-21 17:29:58	1998-07-22 05:00:00	1.59956	4.1	0.9	1998-07-21 19:00:00	1998-07-22 19:45:00	1998-07-23 06:00:00	49.25	94	54.75	604324
283	1998-07-23 10:00:00	1998-07-23 11:30:01	1998-07-23 21:00:00	2.2993	8.2	10.4	1998-07-23 11:00:00	1998-07-23 19:00:00	1998-07-24 21:00:00	55	147	74.25	2.82036e+06
284	1998-10-03 14:15:00	1998-10-03 16:30:00	1998-10-03 19:00:00	3.19998	8.8	2.7	1998-10-03 18:00:00	1998-10-04 00:30:00	1998-10-04 17:00:00	19.25	29	21.5	302738
285	1998-10-16 04:00:00	1998-10-16 16:10:35	1998-10-16 18:00:00	0.1	1.2	3.6	1998-10-16 04:00:00	1998-10-16 08:15:00	1998-10-18 18:00:00	18.5	20	17.75	345619
286	1998-10-20 05:20:00	1998-10-20 05:50:00	1998-10-20 09:00:00	0.266667	0.7	4.9	1998-10-20 06:00:00	1998-10-20 06:30:00	1998-10-20 10:00:00	19.5	20	18.75	4795.31
287	1998-10-20 14:00:00	1998-10-20 14:30:00	1998-10-20 18:00:00	0.3	0.6	5.6	1998-10-20 16:00:00	1998-10-21 15:45:00	1998-10-22 15:00:00	19.5	22	20	157739
288	1998-10-21 13:00:00	1998-10-21 15:30:02	1998-10-21 22:00:00	0.599868	1.5	9.8	1998-10-21 13:00:00	1998-10-22 01:45:00	1998-10-22 11:00:00	20	24	20.5	112388
289	1998-10-22 15:00:00	1998-10-22 16:30:01	1998-10-22 19:00:00	0.199967	0.6	6.5	1998-10-22 23:00:00	1998-10-23 06:00:00	1998-10-23 09:00:00	20	22	20.25	25475.6
290	1998-10-25 02:20:00	1998-10-25 03:29:58	1998-10-25 11:00:00	8.69722	13.4	7	1998-10-25 03:00:00	1998-10-25 11:15:00	1998-10-27 21:00:00	19	33	22.25	1.51365e+06
291	1998-10-26 15:00:00	1998-10-26 17:30:02	1998-10-26 20:00:00	2.1998	7	21.8	1998-10-26 19:00:00	1998-10-26 20:30:00	1998-10-27 12:00:00	26	35	24	219018
292	1998-10-29 15:00:00	1998-10-29 19:23:27	1998-10-29 23:00:00	1.2	4.4	25.5	1998-10-29 17:00:00	1998-10-30 04:30:00	1998-10-30 18:00:00	20.5	26	21.75	179798
293	1998-11-02 06:00:00	1998-11-03 01:57:43	1998-11-03 05:00:00	0.1	2.4	12.2	1998-11-02 10:00:00	1998-11-02 13:15:00	1998-11-03 08:00:00	20.25	22	20	37659.4
294	1998-11-05 19:00:00	1998-11-05 21:30:02	1998-11-06 02:00:00	0.999867	3.4	4.5	1998-11-05 19:00:00	1998-11-06 01:45:00	1998-11-06 03:00:00	19.5	23	21.25	21867.2
295	1998-11-09 09:00:00	1998-11-09 10:30:07	1998-11-09 15:00:00	0.2	0.9	18.7	1998-11-09 10:00:00	1998-11-09 18:00:00	1998-11-09 22:00:00	16.75	22	20	54637.5
296	1998-11-10 23:00:00	1998-11-11 01:30:02	1998-11-11 17:00:00	2.29907	6.1	19.6	1998-11-10 23:15:00	1998-11-10 23:15:00	1998-11-12 05:00:00	24	24	20.5	24472.1
297	1998-11-13 13:00:00	1998-11-13 13:30:00	1998-11-13 17:00:00	0.6	1	17.2	1998-11-13 13:00:00	1998-11-13 16:45:00	1998-11-14 09:00:00	12	29	16.25	518656
298	1999-01-16 06:00:00	1999-01-16 07:30:01	1999-01-16 09:00:00	1.3996	2.7	0.7	1999-01-16 08:00:00	1999-01-16 13:00:00	1999-01-16 23:00:00	16	18	17	30840
299	1999-01-20 14:00:00	1999-01-20 23:59:56	1999-01-21 22:00:00	0.5	7.9	2.7	1999-01-20 14:00:00	1999-01-22 18:30:00	1999-01-22 21:00:00	17	23	19.25	105916
300	1999-01-22 15:30:00	1999-01-22 19:29:55	1999-01-22 20:00:00	0.49973	1.1	7.9	1999-01-22 17:00:00	1999-01-23 17:00:00	1999-01-24	13.25	28	18.25	342784
301	1999-01-27 01:00:00	1999-01-27 09:30:03	1999-01-27 18:00:00	0.2	1.6	2.3	1999-01-27 01:00:00	1999-01-27 20:15:00	1999-01-28 12:00:00	17	18	6.8	270108
302	1999-02-05 05:07:30	1999-02-05 05:37:30	1999-02-05 21:00:00	0.775	4.8	0	1999-02-05 09:00:00	1999-02-05 20:15:00	1999-02-05 22:00:00	17	18	17	900
303	1999-02-10	1999-02-10 05:29:59	1999-02-10 23:00:00	2.39996	11.9	4.9	1999-02-10	1999-02-10 06:15:00	1999-02-11 09:00:00	22.25	39	4.925	537497
304	1999-02-12 18:30:00	1999-02-12 19:29:57	1999-02-12 20:00:00	0.299933	0.5	12	1999-02-12 19:00:00	1999-02-13 18:15:00	1999-02-14 06:00:00	27.5	36	17.75	216399
305	1999-03-12 05:30:00	1999-03-12 08:29:59	1999-03-12 16:00:00	0.299999	1.9	3.8	1999-03-12 12:00:00	1999-03-12 20:45:00	1999-03-13 08:00:00	15	20	6.6	386730
306	1999-04-21 09:00:00	1999-04-21 15:30:13	1999-04-22 18:00:00	1.4	12.4	1.2	1999-04-21 09:00:00	1999-04-22	1999-04-22 21:00:00	36.75	42	36.25	317719
307	1999-04-23 00:12:00	1999-04-25 11:30:02	1999-04-25 20:00:00	3.1998	46.4	13.6	1999-04-23 02:00:00	1999-04-25 22:30:00	1999-04-26 09:00:00	37.5	58	48.75	426730
308	1999-04-26 15:00:00	1999-04-26 22:29:56	1999-04-26 23:00:00	0.408623	1	59.9	1999-04-26 17:00:00	1999-04-27 03:15:00	1999-04-27 08:00:00	44.25	72	60.75	447210
309	1999-04-28 10:00:00	1999-04-29 03:29:56	1999-04-30 05:00:00	1.69932	12.7	47.6	1999-04-28 12:00:00	1999-04-29 01:30:00	1999-04-30 13:00:00	58.5	68	55	1.04779e+06
310	1999-05-02 21:00:00	1999-05-03 12:29:59	1999-05-04 22:00:00	1	18.4	12.9	1999-05-02 22:00:00	1999-05-03 20:00:00	1999-05-05 15:00:00	48.5	85	59.25	3.7035e+06
311	1999-05-05 06:00:00	1999-05-06 01:57:43	1999-05-06 05:00:00	0.1	2.4	18.4	1999-05-05 06:15:00	1999-05-05 06:15:00	1999-05-06 09:00:00	70	69	57.75	84012.3
312	1999-05-13 19:00:00	1999-05-13 21:29:56	1999-05-15 05:00:00	2.69971	13.7	0	1999-05-13 19:00:00	1999-05-14 07:30:00	1999-05-15 09:00:00	84.75	107	100.9	1.04986e+06
313	1999-05-24 14:00:00	1999-05-24 18:44:54	1999-05-25 02:00:00	0.306248	1	0.2	1999-05-24 16:00:00	1999-05-25 11:00:00	1999-05-25 17:00:00	119.25	122	115	94342.5
314	1999-05-26 13:00:00	1999-05-26 16:29:57	1999-05-26 17:00:00	0.599864	1.1	1.2	1999-05-26 13:00:00	1999-05-27 10:45:00	1999-05-27 12:00:00	117.5	125	121.25	21423.9
315	1999-05-29 11:30:00	1999-05-29 15:29:55	1999-05-29 16:00:00	0.408477	0.9	3.4	1999-05-29 13:00:00	1999-05-30 07:00:00	1999-05-30 12:00:00	137.25	144	138	47907.9
316	1999-07-07 10:00:00	1999-07-07 15:29:59	1999-07-08 21:00:00	2.7	28.5	0.3	1999-07-07 10:00:00	1999-07-08 04:15:00	1999-07-09 22:00:00	44.25	96	49.5	2.77345e+06
317	1999-07-26 14:06:39	1999-07-26 15:29:57	1999-07-26 16:00:00	2.09895	3	0	1999-07-26 22:00:00	1999-07-27 13:00:00	1999-07-28 20:00:00	22.25	29	23.5	362557
318	1999-07-27 15:30:00	1999-07-27 21:49:59	1999-07-27 23:00:00	0.266663	0.9	3	1999-07-27 16:00:00	1999-07-27 22:15:00	1999-07-28 01:00:00	25.75	29	26	28850
319	1999-07-29 12:00:00	1999-07-30 21:29:57	1999-07-31	0.99928	9.8	5.3	1999-07-29 14:00:00	1999-07-29 20:30:00	1999-07-31 05:00:00	24.25	109	29	712538
320	1999-08-27 07:00:00	1999-08-27 16:31:28	1999-08-27 22:00:00	3.90495	10.6	12	1999-08-27 11:00:00	1999-08-27 14:00:00	1999-08-28 07:00:00	18.5	21	18.5	36000
321	1999-08-30 11:06:00	1999-08-30 13:30:01	1999-08-30 16:00:00	5.99742	7.8	15.8	1999-08-30 12:00:00	1999-08-31 00:15:00	1999-09-01 21:00:00	18	32	20.25	865995
322	1999-09-10 13:00:00	1999-09-10 13:30:00	1999-09-12 05:00:00	2.2	11.5	0	1999-09-11 04:00:00	1999-09-11 11:15:00	1999-09-12 07:00:00	17.5	20	17	61254.2
323	1999-10-06 22:00:00	1999-10-06 22:30:00	1999-10-07	0.1	0.3	3.6	1999-10-07 02:00:00	1999-10-07 10:15:00	1999-10-09 21:00:00	14.5	20	14.25	597252
324	1999-12-02 22:00:00	1999-12-03 06:29:57	1999-12-03 12:00:00	1.09968	5	0.6	1999-12-02 22:00:00	1999-12-02 22:45:00	1999-12-03 16:00:00	18.25	19	9	13706.9
325	1999-12-03 23:00:00	1999-12-04 01:30:02	1999-12-04 05:00:00	0.1	0.5	5.6	1999-12-04 06:00:00	1999-12-04 13:30:00	1999-12-04 16:00:00	3.725	9.8	6.7	20536.5
326	1999-12-05 06:00:00	1999-12-06 01:57:43	1999-12-06 05:00:00	0.1	2.4	6.1	1999-12-05 11:00:00	1999-12-05 13:30:00	1999-12-06 10:00:00	4.75	24	6.7	273283
327	1999-12-08 06:00:00	1999-12-08 06:30:00	1999-12-08 14:00:00	0.1	0.6	7.9	1999-12-08 06:00:00	1999-12-09 09:00:00	1999-12-09 11:00:00	13.25	25	9.975	78978.9
328	1999-12-11 02:00:00	1999-12-11 02:30:00	1999-12-11 09:00:00	0.1	0.5	6.4	1999-12-11 03:00:00	1999-12-11 11:45:00	1999-12-11 14:00:00	16.5	20	16.5	19800
329	1999-12-12 06:00:00	1999-12-13 01:57:43	1999-12-13 05:00:00	0.1	2.4	4.5	1999-12-12 07:00:00	1999-12-12 13:45:00	1999-12-14 03:00:00	15.75	17	8.225	249391
330	2000-01-04 16:20:00	2000-01-04 18:29:59	2000-01-04 20:00:00	0.599999	1.5	6.5	2000-01-04 17:00:00	2000-01-04 18:00:00	2000-01-04 21:00:00	16.75	18	15.25	16509.4
331	2000-01-07 10:00:00	2000-01-07 11:30:01	2000-01-07 18:00:00	0.199967	0.9	8.6	2000-01-07 10:00:00	2000-01-08 11:15:00	2000-01-08 15:00:00	11.75	26	14.75	306000
332	2000-01-17 06:00:00	2000-01-18 05:30:03	2000-01-18 11:00:00	0.799636	9.5	0	2000-01-17 11:00:00	2000-01-18 11:00:00	2000-01-19 11:00:00	16.5	24	20	443152
333	2000-01-22 05:00:00	2000-01-22 08:29:57	2000-01-22 09:00:00	1.80045	2	22.2	2000-01-22 10:00:00	2000-01-22 11:30:00	2000-01-22 15:00:00	20.5	30	17.3571	30664.3
334	2000-01-25 05:00:00	2000-01-25 09:29:58	2000-01-25 21:00:00	0.299965	2.8	14.7	2000-01-25 10:00:00	2000-01-26 04:45:00	2000-01-26 10:00:00	17.25	40	21.5	92833.6
335	2000-01-31 01:00:00	2000-01-31 03:30:02	2000-01-31 15:00:00	0.599802	3	6.7	2000-01-31 01:15:00	2000-01-31 02:00:00	2000-02-01 03:00:00	17	28	11.15	270194
336	2000-02-12 03:00:00	2000-02-12 04:30:01	2000-02-12 16:00:00	0.299934	1.8	3.6	2000-02-12 12:00:00	2000-02-12 12:15:00	2000-02-12 17:00:00	16.25	17	16	2182.5
337	2000-02-13 11:00:00	2000-02-13 22:10:40	2000-02-13 23:00:00	0.1	1.1	5.4	2000-02-13 15:00:00	2000-02-14 13:30:00	2000-02-14 14:00:00	14.75	18	16	43588.9
338	2000-02-19 16:30:00	2000-02-19 21:29:56	2000-02-19 22:00:00	0.901444	1.2	14.7	2000-02-19 17:00:00	2000-02-19 18:15:00	2000-02-20 09:00:00	9.375	18	14	282289
339	2000-02-20 17:00:00	2000-02-20 17:30:00	2000-02-20 19:00:00	0.2	0.4	15.8	2000-02-20 17:00:00	2000-02-20 20:30:00	2000-02-20 22:00:00	16	18	17	6075
340	2000-02-21 16:30:00	2000-02-21 19:01:26	2000-02-21 22:00:00	1.1	3.3	12.6	2000-02-21 16:45:00	2000-02-22	2000-02-22 05:00:00	20	20	18.25	12262.5
341	2000-02-23 12:00:00	2000-02-23 12:30:00	2000-02-23 14:00:00	0.1	0.3	7.3	2000-02-23 12:00:00	2000-02-23 12:15:00	2000-02-23 17:00:00	18.75	17	16.25	3262.5
342	2000-02-25 13:00:00	2000-02-25 13:30:00	2000-02-25 16:00:00	0.1	0.4	15.1	2000-02-25 14:00:00	2000-02-25 17:45:00	2000-02-26 08:00:00	9.1	21	4.325	326696
343	2000-02-26 08:07:30	2000-02-26 08:37:30	2000-02-26 11:00:00	0.709375	1.1	14.3	2000-02-26 09:00:00	2000-02-26 18:30:00	2000-02-27 10:00:00	4.925	29	11	727057
344	2000-02-28 11:00:00	2000-02-28 13:30:02	2000-02-28 20:00:00	0.999933	4.1	11.7	2000-02-28 16:00:00	2000-02-29 17:15:00	2000-02-29 19:00:00	17.75	23	20.25	31300
345	2000-02-29 19:00:00	2000-03-01 03:30:03	2000-03-02	0.6	7.4	15.5	2000-02-29 19:15:00	2000-02-29 19:30:00	2000-03-02 12:00:00	20	21	16.75	15297.9
346	2000-03-02 07:00:00	2000-03-02 13:30:01	2000-03-02 17:00:00	0.299969	1	13	2000-03-02 08:00:00	2000-03-03 16:30:00	2000-03-03 18:00:00	17	18	16	29964.7
347	2000-03-03 12:00:00	2000-03-03 12:30:00	2000-03-03 17:00:00	0.1	0.6	12.5	2000-03-03 12:00:00	2000-03-04 01:45:00	2000-03-04 05:00:00	14	20	18	49870.6
348	2000-03-20 08:00:00	2000-03-20 17:31:40	2000-03-21 17:00:00	0.3	4.5	0.8	2000-03-20 12:00:00	2000-03-21 16:45:00	2000-03-22 04:00:00	13.25	20	16.75	228305
349	2000-04-22 21:02:36	2000-04-22 21:32:36	2000-04-23 01:00:00	2.20347	3.5	1.6	2000-04-22 23:00:00	2000-04-23 05:15:00	2000-04-23 21:00:00	33.75	36	32.5	125256
350	2000-05-18 01:00:00	2000-05-18 03:35:39	2000-05-18 06:00:00	0.5	1.8	4.8	2000-05-18 01:15:00	2000-05-18 01:15:00	2000-05-18 08:00:00	70.5	70	67.375	4910.42
351	2000-05-18 14:00:00	2000-05-18 15:30:07	2000-05-18 17:00:00	0.2	0.6	6.6	2000-05-18 16:00:00	2000-05-18 23:00:00	2000-05-21 04:00:00	66.375	68	58.75	51300
352	2000-05-24 11:08:34	2000-05-24 12:12:02	2000-05-24 15:00:00	0.7	1.9	0.6	2000-05-24 12:00:00	2000-05-24 17:45:00	2000-05-24 21:00:00	99.9	105	103	16735
353	2000-05-25 12:30:00	2000-05-25 13:00:00	2000-05-25 17:00:00	0.2	0.5	1.9	2000-05-25 12:45:00	2000-05-25 12:45:00	2000-05-25 19:00:00	101	102	95.375	14051.2
354	2000-05-25 22:30:00	2000-05-25 23:29:57	2000-05-26 04:00:00	0.399866	1.1	2.4	2000-05-25 23:00:00	2000-05-26 01:00:00	2000-05-26 05:00:00	94.25	97	92.75	22500
355	2000-06-13 06:00:00	2000-06-14 02:58:09	2000-06-14 05:00:00	0.1	2.3	0	2000-06-13 06:00:00	2000-06-14 10:30:00	2000-06-14 18:00:00	36	50	45.75	214444
356	2000-06-18 20:07:30	2000-06-19 05:29:57	2000-06-19 06:00:00	12.8924	25.1	2.5	2000-06-18 21:00:00	2000-06-19 04:30:00	2000-06-20	44	128	37	1557625
357	2000-07-07 14:00:00	2000-07-07 14:30:00	2000-07-07 16:00:00	0.1	0.3	0	2000-07-07 21:00:00	2000-07-08 14:00:00	2000-07-10 22:00:00	22.5	28	22	1.693e+06
358	2000-07-08 12:00:00	2000-07-08 14:30:02	2000-07-08 17:00:00	0.499802	1.2	0.3	2000-07-08 12:00:00	2000-07-09 01:30:00	2000-07-09 19:00:00	26.5	39	29.0833	426281
359	2000-08-08 11:30:00	2000-08-08 14:29:59	2000-08-08 18:00:00	3.89998	10.3	14.2	2000-08-08 12:00:00	2000-08-08 21:45:00	2000-08-11 01:00:00	8.9	16	9.55	555793
360	2000-08-16 14:00:00	2000-08-16 14:30:00	2000-08-16 18:00:00	5.8	9	5.8	2000-08-16 16:00:00	2000-08-16 17:15:00	2000-08-17	19	98	12	241256
361	2000-08-17 12:00:00	2000-08-17 14:37:27	2000-08-18 04:00:00	0.73734	3.1	14.9	2000-08-17 17:00:00	2000-08-18 10:30:00	2000-08-19 02:00:00	13	17	11.25	269881
362	2000-08-27 12:10:00	2000-08-27 15:29:56	2000-08-27 17:00:00	1.6999	6.1	20.8	2000-08-27 16:00:00	2000-08-27 17:15:00	2000-08-27 21:00:00	21.25	79	13.25	153270
363	2000-08-28 07:00:00	2000-08-28 13:44:56	2000-08-28 15:00:00	0.324952	1	26.9	2000-08-28 07:15:00	2000-08-28 07:15:00	2000-08-28 18:00:00	15	16	13	13468.6
364	2000-08-28 21:12:00	2000-08-28 22:29:59	2000-08-28 23:00:00	0.799979	1.3	27.9	2000-08-29 05:00:00	2000-08-29 19:45:00	2000-09-02 21:00:00	12.5	28	16	2.43947e+06
365	2000-08-30 11:15:00	2000-08-30 14:30:01	2000-08-30 19:00:00	5.49897	22.4	50.8	2000-08-30 13:00:00	2000-08-30 14:30:00	2000-08-30 22:00:00	18.5	40	17	63750
366	2000-10-10 05:04:36	2000-10-10 10:29:53	2000-10-10 21:00:00	2.49839	18.7	0	2000-10-10 07:00:00	2000-10-10 23:00:00	2000-10-12 05:00:00	12.25	19	13.75	390385
367	2000-10-22 04:00:00	2000-10-22 11:30:02	2000-10-22 14:00:00	0.499936	1.9	20.7	2000-10-22 04:15:00	2000-10-22 04:15:00	2000-10-22 18:00:00	19	19	16	2241.82
368	2000-10-22 19:30:00	2000-10-22 21:29:58	2000-10-23 01:00:00	0.399932	1.4	22.6	2000-10-23	2000-10-24 01:00:00	2000-10-24 22:00:00	15.75	20	16	265899
369	2000-10-23 14:00:00	2000-10-23 15:31:25	2000-10-23 19:00:00	0.8	2.5	24	2000-10-23 15:00:00	2000-10-24 05:15:00	2000-10-24 17:00:00	16	22	17	189459
370	2000-10-24 13:00:00	2000-10-24 15:26:43	2000-10-24 17:00:00	0.6	2.2	26.5	2000-10-24 13:15:00	2000-10-24 13:15:00	2000-10-24 18:00:00	18	18	17	3173.68
371	2000-10-26 22:00:00	2000-10-27 15:30:02	2000-10-28 15:00:00	1.59994	19.1	28.8	2000-10-27 07:00:00	2000-10-27 21:30:00	2000-10-28 18:00:00	14.25	32	17	434403
372	2000-10-29 22:00:00	2000-10-30 10:30:02	2000-10-30 18:00:00	2.69975	23.9	21.4	2000-10-30	2000-10-30 14:00:00	2000-10-30 22:00:00	15.25	27	18	125803
373	2000-10-31 04:00:00	2000-10-31 09:29:59	2000-11-02 05:00:00	1	12.2	43.1	2000-10-31 05:00:00	2000-10-31 10:15:00	2000-11-02 12:00:00	18	21	8.4	891388
374	2000-11-05 03:30:00	2000-11-05 04:29:57	2000-11-05 07:00:00	0.599732	1	12.2	2000-11-05 03:45:00	2000-11-05 03:45:00	2000-11-05 10:00:00	18	19	17	2682
375	2000-11-06 11:00:00	2000-11-07 03:03:57	2000-11-07 05:00:00	0.3	2.2	1	2000-11-06 12:00:00	2000-11-06 22:30:00	2000-11-07 11:00:00	11.5	19	13.25	243746
376	2000-11-21 14:00:00	2000-11-21 14:30:00	2000-11-21 16:00:00	0.1	0.3	0.3	2000-11-21 14:00:00	2000-11-21 21:15:00	2000-11-22 03:00:00	14.5	16	13	28471.2
377	2001-01-16 12:00:00	2001-01-16 12:30:00	2001-01-17 01:00:00	0.1	1.2	5	2001-01-16 15:00:00	2001-01-17 12:00:00	2001-01-17 15:00:00	8.425	18	6.3	89911.4
378	2001-01-24 21:00:00	2001-01-25 06:29:58	2001-01-25 13:00:00	0.499963	3.6	0.3	2001-01-24 22:00:00	2001-01-25	2001-01-25 16:00:00	12	13	9.425	14448.4
379	2001-01-27 19:00:00	2001-01-27 19:30:00	2001-01-27 23:00:00	0.1	0.5	3.6	2001-01-27 19:15:00	2001-01-27 19:15:00	2001-01-28 05:00:00	9.8	10	9.55	4488.46
380	2001-01-28 13:00:00	2001-01-28 13:30:00	2001-01-28 17:00:00	0.1	0.5	4.1	2001-01-28 14:00:00	2001-01-29 12:00:00	2001-01-29 15:00:00	9.425	17	5.6	73156.9
381	2001-01-29 19:00:00	2001-01-30 00:29:59	2001-01-30 12:00:00	0.299998	2.2	4.6	2001-01-29 20:00:00	2001-01-29 23:15:00	2001-01-30 13:00:00	10.825	14	9.1	79437.9
382	2001-02-10 23:00:00	2001-02-11 00:30:01	2001-02-11 04:00:00	0.399967	1.3	4.7	2001-02-10 23:15:00	2001-02-10 23:15:00	2001-02-11 07:00:00	21	22	8.025	10947.7
383	2001-02-18 03:00:00	2001-02-18 04:30:01	2001-02-18 08:00:00	0.599835	1.5	10	2001-02-18 06:00:00	2001-02-18 23:15:00	2001-02-19 03:00:00	12.5	15	13	23164.3
384	2001-03-16 08:00:00	2001-03-16 12:55:07	2001-03-16 18:00:00	0.4	2.5	5.1	2001-03-16 08:15:00	2001-03-16 08:15:00	2001-03-17	16	16	14.25	26725
385	2001-03-22 23:00:00	2001-03-22 23:30:00	2001-03-23 01:00:00	0.1	0.3	0	2001-03-22 23:00:00	2001-03-23 02:45:00	2001-03-23 18:00:00	35.75	40	26.5	115431
386	2001-04-21 06:00:00	2001-04-22 06:33:46	2001-04-22 11:00:00	0.8	8.3	2.4	2001-04-21 06:15:00	2001-04-21 07:00:00	2001-04-22 13:00:00	43	45	40.5	201745
387	2001-05-17 04:00:00	2001-05-17 06:30:02	2001-05-17 08:00:00	2.69828	3.5	1.8	2001-05-17 06:00:00	2001-05-17 09:00:00	2001-05-17 11:00:00	134	145	141.75	47497.5
388	2001-07-04 14:00:00	2001-07-04 14:30:00	2001-07-04 16:00:00	0.8	1.1	0	2001-07-04 19:00:00	2001-07-05 02:30:00	2001-07-06 10:00:00	31	34	31	190350
389	2001-07-06 12:03:00	2001-07-06 12:33:00	2001-07-07 01:00:00	1.98531	8.1	3.8	2001-07-06 16:00:00	2001-07-06 18:15:00	2001-07-07 19:00:00	30.5	55	30.5	935325
390	2001-07-14 18:01:45	2001-07-14 18:31:45	2001-07-16 05:00:00	3.30292	14.9	11.4	2001-07-14 20:00:00	2001-07-15 05:30:00	2001-07-16 13:00:00	25.75	38	25.5	458273
391	2001-08-01 19:06:00	2001-08-01 23:29:58	2001-08-02 02:00:00	3.19885	10.9	0	2001-08-02 07:00:00	2001-08-02 11:00:00	2001-08-03	13.25	15	13.25	49050
392	2001-08-03 09:30:00	2001-08-03 11:30:04	2001-08-03 18:00:00	3.19654	9	10.9	2001-08-03 10:00:00	2001-08-03 17:00:00	2001-08-04	16	68	20	277650
393	2001-08-06 11:30:00	2001-08-06 12:29:57	2001-08-06 13:00:00	0.299933	0.5	19.9	2001-08-06 20:00:00	2001-08-07 04:45:00	2001-08-07 19:00:00	14	17	14	122400
394	2001-08-08 13:00:00	2001-08-08 17:29:58	2001-08-08 21:00:00	2.79909	5.2	9.7	2001-08-08 13:00:00	2001-08-09 18:30:00	2001-08-09 23:00:00	14.75	38	16	197911
395	2001-08-19 14:30:00	2001-08-19 15:30:03	2001-08-20 08:00:00	2.299	7.1	2.1	2001-08-19 21:00:00	2001-08-20 12:00:00	2001-08-23 21:00:00	12.25	17	13	937726
396	2001-10-08 18:00:00	2001-10-09 05:30:01	2001-10-09 07:00:00	3.29927	8	2.7	2001-10-09	2001-10-09 07:00:00	2001-10-10 10:00:00	12	24	14.25	357877
397	2001-10-30 13:00:00	2001-10-31 05:30:00	2001-10-31 08:00:00	0.999918	5.2	0	2001-10-31 01:00:00	2001-10-31 13:30:00	2001-11-01 07:00:00	11.25	16	12	203040
398	2001-11-05 14:20:00	2001-11-05 14:50:00	2001-11-05 16:00:00	0.233333	0.4	0	2001-11-05 15:00:00	2001-11-06 02:30:00	2001-11-06 15:00:00	12	13	12.5	23873.4
399	2001-11-07 11:20:00	2001-11-07 12:57:02	2001-11-07 15:00:00	1	2.5	0.4	2001-11-07 16:00:00	2001-11-07 22:15:00	2001-11-08 07:00:00	12.5	14	13	39832.5
400	2001-11-13 06:00:00	2001-11-13 07:30:01	2001-11-13 11:00:00	2.99934	4.8	2.6	2001-11-13 08:00:00	2001-11-13 18:45:00	2001-11-13 19:00:00	12.75	14	13.25	2914.77
401	2001-11-22 09:20:00	2001-11-22 16:29:59	2001-11-23 11:00:00	1.49999	10.9	0.3	2001-11-22 18:00:00	2001-11-22 22:00:00	2001-11-23 12:00:00	13.75	15	13	38840.6
402	2001-11-25 02:30:00	2001-11-25 04:29:58	2001-11-25 17:00:00	2.99939	10.6	11.3	2001-11-25 03:00:00	2001-11-25 03:45:00	2001-11-25 21:00:00	18.25	19	9.3	24208.8
403	2001-11-27 01:00:00	2001-11-27 01:30:00	2001-11-27 05:00:00	0.2	0.8	22.6	2001-11-27 06:00:00	2001-11-27 19:30:00	2001-11-28 03:00:00	12.5	15	6	254400
404	2001-11-30 08:00:00	2001-11-30 14:30:01	2001-11-30 17:00:00	0.299969	1.5	24.1	2001-11-30 10:00:00	2001-11-30 11:30:00	2001-11-30 20:00:00	11.45	20	14.25	54544.5
405	2001-12-01 17:00:00	2001-12-01 17:30:00	2001-12-01 19:00:00	0.1	0.3	14.9	2001-12-01 17:00:00	2001-12-01 19:45:00	2001-12-02 02:00:00	8.325	20	17	112784
406	2001-12-03 22:00:00	2001-12-03 22:30:00	2001-12-04 01:00:00	0.1	0.4	14.2	2001-12-03 22:15:00	2001-12-03 22:15:00	2001-12-04 02:00:00	15	15	14	60
407	2001-12-04 06:00:00	2001-12-04 06:30:00	2001-12-04 16:00:00	0.2	1	14.6	2001-12-04 06:15:00	2001-12-04 06:15:00	2001-12-04 21:00:00	14	14	13	23918.6
408	2001-12-05 16:30:00	2001-12-05 17:00:00	2001-12-05 18:00:00	0.15	0.3	3.7	2001-12-05 17:00:00	2001-12-06 14:00:00	2001-12-06 16:00:00	9.425	17	14	108803
409	2001-12-07 01:20:00	2001-12-07 01:50:00	2001-12-07 05:00:00	0.3	0.9	2.5	2001-12-07 01:35:00	2001-12-07 01:45:00	2001-12-07 06:00:00	15	14	14	0
410	2001-12-10 14:00:00	2001-12-10 16:58:59	2001-12-10 20:00:00	0.2	1	1.2	2001-12-10 14:00:00	2001-12-10 19:30:00	2001-12-11 01:00:00	12.75	17	13	40863.1
411	2001-12-23 12:00:00	2001-12-23 12:30:00	2001-12-23 19:00:00	0.1	0.6	0.7	2001-12-23 12:00:00	2001-12-23 12:45:00	2001-12-24	11.5	13	3.075	122384
412	2001-12-29 05:15:00	2001-12-29 05:45:18	2001-12-29 22:00:00	0.4	2.2	0.6	2001-12-29 09:00:00	2001-12-29 11:45:00	2001-12-30 01:00:00	12.5	14	12.25	37582
413	2001-12-30 12:30:00	2001-12-30 14:29:58	2001-12-30 17:00:00	0.799796	2	2.2	2001-12-30 22:00:00	2001-12-30 22:45:00	2001-12-31 01:00:00	13.25	14	13.25	2362.5
414	2002-01-05 05:20:00	2002-01-05 09:06:35	2002-01-06 05:00:00	0.3	5.4	4.2	2002-01-05 06:00:00	2002-01-05 21:00:00	2002-01-06 11:00:00	4.425	16	12.25	234212
415	2002-01-06 14:00:00	2002-01-06 15:30:01	2002-01-06 20:00:00	0.499967	2.1	5.6	2002-01-06 17:00:00	2002-01-06 17:30:00	2002-01-06 21:00:00	13.5	14	13	4218.75
416	2002-02-19 19:00:00	2002-02-19 21:30:02	2002-02-20 17:00:00	1.19993	8.1	1.4	2002-02-19 19:00:00	2002-02-19 19:15:00	2002-02-21 04:00:00	13.5	14	12	24975
417	2002-02-20 22:00:00	2002-02-20 22:30:00	2002-02-21	0.2	0.4	9.5	2002-02-20 23:00:00	2002-02-20 23:15:00	2002-02-21 04:00:00	13.5	14	12	4725
418	2002-03-07 05:30:00	2002-03-07 06:00:00	2002-03-07 10:00:00	0.2	0.8	0	2002-03-07 06:00:00	2002-03-07 18:15:00	2002-03-07 20:00:00	12.25	15	14	7396.88
419	2002-03-08 03:00:00	2002-03-08 04:30:01	2002-03-08 08:00:00	0.399934	1.2	0.8	2002-03-08 04:00:00	2002-03-08 19:30:00	2002-03-09 03:00:00	13	15	2.575	218225
420	2002-05-10 18:30:00	2002-05-10 19:00:00	2002-05-10 22:00:00	0.116667	0.3	0	2002-05-10 21:00:00	2002-05-11 04:45:00	2002-05-11 06:00:00	24	26	25	4200
421	2002-05-11 12:00:00	2002-05-11 12:30:00	2002-05-11 17:00:00	0.1	0.6	0.3	2002-05-11 12:15:00	2002-05-11 13:00:00	2002-05-11 18:00:00	24	25	24	2700
422	2002-07-15 12:12:00	2002-07-15 16:29:57	2002-07-15 17:00:00	0.499775	1.6	0	2002-07-16 02:00:00	2002-07-16 12:15:00	2002-07-21 03:00:00	5.8	7.6	5.6	801359
423	2002-07-24	2002-07-24 00:30:00	2002-07-24 02:00:00	0.1	0.3	6.7	2002-07-24 01:00:00	2002-07-24 01:30:00	2002-07-24 05:00:00	9.125	10	8	7285.78
424	2002-07-24 11:03:31	2002-07-24 16:29:54	2002-07-24 23:00:00	1.79853	8.3	1.6	2002-07-24 20:00:00	2002-07-25 08:30:00	2002-07-25 19:00:00	7.6	10	8.1	85259.3
425	2002-07-25 17:05:27	2002-07-25 18:30:03	2002-07-26 02:00:00	4.59862	12.3	8.6	2002-07-25 21:00:00	2002-07-27 00:45:00	2002-07-28 01:00:00	8.775	14	7.6	532809
426	2002-08-03 13:04:00	2002-08-03 14:03:33	2002-08-03 15:00:00	1.5	3	2.2	2002-08-04 02:00:00	2002-08-04 10:30:00	2002-08-05 02:00:00	7.2	9.3	5.6	101025
427	2002-09-08 13:20:00	2002-09-08 16:30:01	2002-09-08 20:00:00	2.49929	6.9	5.2	2002-09-08 15:00:00	2002-09-08 17:15:00	2002-09-08 23:00:00	8.1	10	6.8	17251.9
428	2002-09-11 05:07:30	2002-09-11 07:03:22	2002-09-11 13:00:00	1	6.2	12.1	2002-09-11 06:00:00	2002-09-11 22:30:00	2002-09-14 02:00:00	6.3	14	7.6	675714
429	2002-09-17 23:00:00	2002-09-18 05:35:01	2002-09-18 11:00:00	1.18324	3.2	12.9	2002-09-18 11:00:00	2002-09-18 23:15:00	2002-09-20	8.4	10	8.25	147690
430	2002-10-01 10:20:00	2002-10-01 15:30:03	2002-10-01 19:00:00	3.99803	7.5	9.6	2002-10-01 11:00:00	2002-10-02 06:30:00	2002-10-06	8.2	17	10	1.68266e+06
431	2002-10-02 00:30:00	2002-10-02 19:30:00	2002-10-03 12:00:00	2.49997	36.5	17.1	2002-10-02 01:00:00	2002-10-02 22:45:00	2002-10-03 21:00:00	13	24	15	378931
432	2002-11-08 13:00:00	2002-11-09 12:30:03	2002-11-09 18:00:00	1.89982	18.3	0	2002-11-09	2002-11-09 13:15:00	2002-11-10 05:00:00	10.2	31	13	478049
433	2002-11-10 10:00:00	2002-11-10 10:30:00	2002-11-10 12:00:00	0.2	0.4	18.3	2002-11-10 10:15:00	2002-11-10 10:15:00	2002-11-10 15:00:00	12	12	11	6631.58
434	2002-11-10 17:00:00	2002-11-10 19:29:56	2002-11-11 05:00:00	2.19919	10	18.7	2002-11-10 22:00:00	2002-11-11 00:45:00	2002-11-11 11:00:00	11	12	11	29700
435	2002-11-29 08:12:00	2002-11-29 08:42:00	2002-11-29 13:00:00	0.40625	1	2.4	2002-11-29 10:00:00	2002-11-30 11:15:00	2002-11-30 14:00:00	5.45	12	7.6	130226
436	2003-01-05 10:00:00	2003-01-05 13:58:49	2003-01-05 17:00:00	0.2	1	1.3	2003-01-05 10:15:00	2003-01-05 10:15:00	2003-01-06 02:00:00	9.8	9.8	9.675	2918.75
437	2003-02-02 04:10:00	2003-02-02 08:30:03	2003-02-03 03:00:00	1.3997	12.3	1.4	2003-02-02 13:00:00	2003-02-02 13:15:00	2003-02-03 10:00:00	11.75	12	4.2	31018.4
438	2003-02-12 15:00:00	2003-02-12 18:29:57	2003-02-13 02:00:00	0.599796	2.7	0	2003-02-12 21:00:00	2003-02-13 21:45:00	2003-02-14 11:00:00	10	14	12.5	165443
439	2003-02-14 08:10:00	2003-02-14 08:40:00	2003-02-14 10:00:00	0.6	1.2	7.1	2003-02-14 12:00:00	2003-02-14 19:15:00	2003-02-14 22:00:00	12.75	16	14.25	15513.8
440	2003-02-16 19:00:00	2003-02-16 19:30:00	2003-02-17 01:00:00	0.6	2.3	9.4	2003-02-16 19:00:00	2003-02-16 22:15:00	2003-02-17 04:00:00	13	16	13	45900
441	2003-02-17 11:01:49	2003-02-17 11:31:49	2003-02-17 16:00:00	3.20279	5.3	11.7	2003-02-17 15:00:00	2003-02-17 18:45:00	2003-02-17 23:00:00	11.25	15	13	27028.1
442	2003-02-18 11:02:51	2003-02-18 11:32:51	2003-02-18 13:00:00	2.2	4.4	17	2003-02-18 11:17:51	2003-02-18 11:30:00	2003-02-18 18:00:00	12	12	11.75	2414.42
443	2003-02-19 21:06:00	2003-02-20 03:36:37	2003-02-20 05:00:00	0.933144	3.1	14.3	2003-02-19 21:21:00	2003-02-19 21:30:00	2003-02-20 10:00:00	14	14	11	4878
444	2003-02-21 06:00:00	2003-02-22 01:57:43	2003-02-22 05:00:00	0.1	2.4	15.1	2003-02-21 16:00:00	2003-02-21 21:15:00	2003-02-22 09:00:00	9.2	13	7.7	134742
445	2003-03-04 04:12:00	2003-03-04 17:37:20	2003-03-05 20:00:00	0.6	9	16	2003-03-04 14:00:00	2003-03-04 19:30:00	2003-03-06 04:00:00	8.65	12	9.8	130319
446	2003-03-20 14:15:00	2003-03-20 14:45:00	2003-03-20 16:00:00	0.35	0.6	38.7	2003-03-20 16:00:00	2003-03-20 19:15:00	2003-03-20 22:00:00	12.5	25	21	97931.3
447	2003-03-26 14:20:00	2003-03-26 16:29:59	2003-03-27 13:00:00	0.799999	8.3	0	2003-03-26 20:00:00	2003-03-27 00:15:00	2003-03-27 15:00:00	25	36	26.25	316238
448	2003-04-07 10:12:00	2003-04-07 12:49:09	2003-04-07 14:00:00	0.6	1.9	4	2003-04-07 13:00:00	2003-04-07 23:15:00	2003-04-08 09:00:00	15.75	21	17.75	148545
449	2003-04-22 10:00:00	2003-04-22 10:30:00	2003-04-22 14:00:00	0.1	0.5	5.7	2003-04-22 13:00:00	2003-04-22 23:15:00	2003-04-23 12:00:00	29	31	26	91741.3
450	2003-04-23 09:12:00	2003-04-23 09:42:00	2003-04-23 16:00:00	0.406667	0.8	6.2	2003-04-23 09:27:00	2003-04-23 09:30:00	2003-04-23 21:00:00	27	27	26	547.826
451	2003-05-24 12:00:00	2003-05-24 12:30:00	2003-05-24 14:00:00	0.2	0.4	0	2003-05-24 12:00:00	2003-05-24 16:45:00	2003-05-25 03:00:00	106	113	108	107010
452	2003-07-28 13:00:00	2003-07-28 15:29:56	2003-07-28 16:00:00	0.133199	0.4	6	2003-07-28 13:00:00	2003-07-28 13:15:00	2003-07-29	13	13	9.2	1165.91
453	2003-07-30 13:00:00	2003-07-30 15:59:59	2003-07-30 17:00:00	0.149999	0.4	6	2003-07-30 13:00:00	2003-07-31 10:45:00	2003-08-05 23:00:00	11	13	11	3271500
454	2003-07-31 11:20:00	2003-07-31 15:30:02	2003-07-31 20:00:00	1.39934	4.4	5.7	2003-07-31 15:00:00	2003-08-01 15:45:00	2003-08-03 18:00:00	12	32	14.5	2.08634e+06
455	2003-08-11 09:08:34	2003-08-11 13:29:55	2003-08-11 14:00:00	2.29822	6.4	2.8	2003-08-11 10:00:00	2003-08-11 14:30:00	2003-08-11 17:00:00	11	13	11	14400
456	2003-08-12 12:30:00	2003-08-12 13:30:03	2003-08-12 17:00:00	1	2.5	9.2	2003-08-12 13:00:00	2003-08-12 15:45:00	2003-08-12 19:00:00	12	13	11	8175
457	2003-08-14 16:00:00	2003-08-14 18:45:16	2003-08-15 04:00:00	0.4	1.4	10.6	2003-08-15 03:00:00	2003-08-16 02:30:00	2003-08-18	8.775	15	9.55	616511
458	2003-08-15 12:15:00	2003-08-15 14:30:00	2003-08-16 02:00:00	4.29968	13.7	11.4	2003-08-16	2003-08-16 17:15:00	2003-08-17 20:00:00	9.45	19	10.75	431714
459	2003-08-21 16:12:00	2003-08-21 17:29:59	2003-08-21 18:00:00	0.799979	1.3	6.8	2003-08-21 20:00:00	2003-08-22 02:15:00	2003-08-22 22:00:00	12	16	12.25	135881
460	2003-08-22 05:30:00	2003-08-22 13:29:59	2003-08-23 03:00:00	1.19999	8.5	8.1	2003-08-22 06:00:00	2003-08-23 05:30:00	2003-08-23 10:00:00	15	17	14.25	42067
461	2003-08-29 11:08:34	2003-08-29 13:29:59	2003-08-30 02:00:00	3.99942	16.8	11.9	2003-08-29 21:00:00	2003-08-30 02:00:00	2003-08-30 17:00:00	10.45	18	12	213925
462	2003-09-01 05:00:00	2003-09-01 09:29:58	2003-09-01 10:00:00	0.111049	0.3	17.2	2003-09-01 07:00:00	2003-09-01 12:30:00	2003-09-02 23:00:00	9.2	11	9.3	186705
463	2003-09-05 13:00:00	2003-09-05 13:30:00	2003-09-05 15:00:00	0.1	0.3	2.2	2003-09-05 13:15:00	2003-09-05 13:30:00	2003-09-05 20:00:00	11	12	9.8	9700
464	2003-09-05 21:00:00	2003-09-05 22:09:52	2003-09-06	0.7	1.6	2.2	2003-09-06	2003-09-06 12:15:00	2003-09-06 23:00:00	9.8	12	9.8	59760
465	2004-10-20	2004-10-20 18:30:03	2004-10-22 17:00:00	4.499	52.1	1.7	2004-10-20 02:00:00	2004-10-22 02:45:00	2004-10-22 20:00:00	13	49	17.25	2.02285e+06
466	2004-11-08 06:00:00	2004-11-08 12:30:01	2004-11-08 16:00:00	0.699969	3.4	0	2004-11-08 09:00:00	2004-11-08 17:00:00	2004-11-08 21:00:00	12.25	26	22.25	77812.5
467	2004-12-09 17:00:00	2004-12-09 17:30:00	2004-12-09 22:00:00	0.1	0.3	5.5	2004-12-09 17:00:00	2004-12-09 17:15:00	2004-12-10 01:00:00	12.5	13	11	7453.13
468	2005-01-06 09:00:00	2005-01-06 13:11:38	2005-01-06 17:00:00	0.5	2.2	12.8	2005-01-06 10:00:00	2005-01-06 16:45:00	2005-01-06 19:00:00	10.1	12	9.95	8152.5
469	2005-01-08 09:00:00	2005-01-08 09:30:00	2005-01-08 11:00:00	0.1	0.3	7.4	2005-01-08 09:00:00	2005-01-08 14:00:00	2005-01-08 16:00:00	11.25	20	14.75	50400
470	2005-01-10 01:06:39	2005-01-10 01:44:09	2005-01-10 03:00:00	1	2	5.8	2005-01-10 03:00:00	2005-01-10 17:15:00	2005-01-10 19:00:00	15.5	22	20.25	14727
471	2005-01-10 12:00:00	2005-01-11 08:30:05	2005-01-12 17:00:00	1.89903	23.6	7.8	2005-01-10 12:00:00	2005-01-11 15:30:00	2005-01-12 22:00:00	16.75	43	1.775	1.63988e+06
472	2005-01-24 19:00:00	2005-01-24 19:30:00	2005-01-24 21:00:00	0.1	0.3	0	2005-01-24 23:00:00	2005-01-25 16:15:00	2005-01-25 18:00:00	17.25	22	16.75	17307.2
473	2005-01-26 15:00:00	2005-01-27 14:29:57	2005-01-27 22:00:00	0.499848	3.7	0.3	2005-01-26 16:00:00	2005-01-27 19:00:00	2005-01-28 05:00:00	17	21	17	129600
474	2005-02-04 14:00:00	2005-02-04 14:30:00	2005-02-04 16:00:00	0.1	0.3	3.9	2005-02-04 14:00:00	2005-02-04 19:00:00	2005-02-05 08:00:00	10.7	25	2.225	388317
475	2005-02-06 22:00:00	2005-02-07 01:29:57	2005-02-07 04:00:00	0.299932	1	0.4	2005-02-06 22:15:00	2005-02-06 22:15:00	2005-02-07 06:00:00	20	21	14.25	8067.34
476	2005-03-02 22:00:00	2005-03-02 22:30:00	2005-03-03	0.1	0.3	4.4	2005-03-02 23:00:00	2005-03-02 23:15:00	2005-03-03 01:00:00	17.75	18	17	1743.75
477	2005-04-04 14:30:00	2005-04-04 20:29:57	2005-04-05 01:00:00	0.599931	2.7	1.5	2005-04-04 15:00:00	2005-04-05 18:00:00	2005-04-06 03:00:00	59.25	72	63.25	459613
478	2005-04-24 19:15:00	2005-04-24 23:36:39	2005-04-25 19:00:00	0.94423	4.7	14.2	2005-04-24 20:00:00	2005-04-25 03:15:00	2005-04-26	150.5	159	147.75	303613
479	2005-05-01 05:10:00	2005-05-01 13:29:56	2005-05-01 19:00:00	1.49924	5.7	10.6	2005-05-01 07:00:00	2005-05-01 17:45:00	2005-05-02 01:00:00	137.25	154	143.75	207319
480	2005-05-02 12:00:00	2005-05-02 17:32:30	2005-05-02 23:00:00	2.3375	4.3	16.5	2005-05-02 14:00:00	2005-05-03 03:45:00	2005-05-03 08:00:00	135.25	202	177.25	357638
481	2005-05-07 18:30:00	2005-05-07 19:00:00	2005-05-07 20:00:00	0.15	0.3	12.7	2005-05-07 20:00:00	2005-05-07 23:30:00	2005-05-08 03:00:00	184.5	196	188	81787.5
482	2005-05-08 02:20:00	2005-05-08 02:50:00	2005-05-08 05:00:00	0.3	0.8	13	2005-05-08 04:00:00	2005-05-09 03:45:00	2005-05-09 06:00:00	188.25	202	195.5	46970.9
483	2005-05-16 19:15:00	2005-05-16 21:30:00	2005-05-17 01:00:00	0.499952	1.6	7	2005-05-16 21:00:00	2005-05-17 06:15:00	2005-05-17 11:00:00	259.5	304	287.25	437569
484	2005-05-17 09:12:00	2005-05-17 09:47:54	2005-05-17 11:00:00	0.5	1	1.9	2005-05-17 11:00:00	2005-05-17 15:00:00	2005-05-17 20:00:00	287.25	300	277	130019
485	2005-06-02 06:30:00	2005-06-03 07:29:56	2005-06-03 09:00:00	4.4978	28.8	0.2	2005-06-02 09:00:00	2005-06-03 06:15:00	2005-06-03 14:00:00	280.75	350	304.5	1.46301e+06
486	2005-06-12 05:05:27	2005-06-12 05:35:27	2005-06-12 07:00:00	1.01817	1.3	17.8	2005-06-12 06:00:00	2005-06-12 15:00:00	2005-06-12 20:00:00	203	219	191.5	207249
487	2005-07-30 11:30:00	2005-07-30 12:30:03	2005-07-30 15:00:00	0.6997	1.4	5.2	2005-07-30 13:00:00	2005-07-31 14:30:00	2005-07-31 22:00:00	45.75	48	43	144862
488	2005-08-01 06:00:00	2005-08-01 07:30:01	2005-08-01 10:00:00	0.199967	0.6	1.4	2005-08-01 06:00:00	2005-08-01 09:45:00	2005-08-01 19:00:00	45	47	43	65873.1
489	2005-10-15 16:00:00	2005-10-15 21:29:53	2005-10-16	3.29589	5.9	0	2005-10-15 22:00:00	2005-10-16 09:00:00	2005-10-17 01:00:00	13	24	15	460250
490	2005-10-18 07:00:00	2005-10-18 17:29:59	2005-10-18 21:00:00	1.19998	8	7.3	2005-10-18 08:00:00	2005-10-19 00:30:00	2005-10-19 21:00:00	14.25	20	15	263683
491	2005-10-28	2005-10-28 10:29:53	2005-10-28 20:00:00	3.89796	26.7	0	2005-10-28 04:00:00	2005-10-28 20:45:00	2005-10-29 17:00:00	14.25	34	19	929819
492	2005-11-11 09:12:00	2005-11-11 09:42:00	2005-11-11 15:00:00	0.413333	1.6	0	2005-11-11 09:27:00	2005-11-11 09:30:00	2005-11-11 16:00:00	22	20	17	242.308
493	2005-11-29 09:00:00	2005-11-30 02:30:02	2005-11-30 05:00:00	0.39994	3.2	0	2005-11-29 09:15:00	2005-11-30	2005-11-30 10:00:00	17	17	15	15255
494	2005-12-03 05:20:00	2005-12-03 08:30:01	2005-12-03 13:00:00	0.399935	1.7	7.8	2005-12-03 05:35:00	2005-12-03 05:45:00	2005-12-03 19:00:00	17	16	13.75	6571.7
495	2005-12-18 14:00:00	2005-12-18 17:29:57	2005-12-19 01:00:00	0.299932	1.8	0	2005-12-18 15:00:00	2005-12-18 15:30:00	2005-12-19 02:00:00	13.25	14	12.5	5021.59
496	2005-12-21 06:30:00	2005-12-21 08:50:01	2005-12-21 21:00:00	0.266634	1.3	1.9	2005-12-21 17:00:00	2005-12-22 14:45:00	2005-12-22 16:00:00	12.5	15	14	6720.65
497	2005-12-28 06:20:00	2005-12-28 06:50:00	2005-12-28 12:00:00	0.266667	1	3.5	2005-12-28 09:00:00	2005-12-28 22:15:00	2005-12-29 11:00:00	13	14	13	42300
498	2006-01-02 19:00:00	2006-01-02 21:30:02	2006-01-03 11:00:00	1.99967	9	7	2006-01-02 21:00:00	2006-01-03 01:00:00	2006-01-03 13:00:00	14.25	17	14	64170.7
499	2006-01-15 13:00:00	2006-01-15 14:30:01	2006-01-15 18:00:00	1.39973	2.6	0.3	2006-01-15 16:00:00	2006-01-15 17:15:00	2006-01-15 19:00:00	13.25	15	13	6412.5
500	2006-01-25 12:00:00	2006-01-25 13:30:01	2006-01-26 04:00:00	1.89944	4.6	0	2006-01-25 12:00:00	2006-01-26 15:15:00	2006-01-26 17:00:00	14	20	15	56273.3
501	2006-01-28 14:00:00	2006-01-28 14:30:00	2006-01-28 19:00:00	0.1	0.6	9.9	2006-01-28 14:15:00	2006-01-28 14:15:00	2006-01-28 21:00:00	15	15	13	66.6667
502	2006-01-29 01:00:00	2006-01-29 04:29:57	2006-01-29 05:00:00	0.399932	1.1	10.5	2006-01-29 01:00:00	2006-01-29 01:15:00	2006-01-29 08:00:00	14.75	15	13	11250
503	2006-01-30 22:00:00	2006-01-31 04:29:55	2006-01-31 05:00:00	1.59864	3	11.9	2006-01-30 22:15:00	2006-01-31 06:00:00	2006-01-31 08:00:00	14	15	14	1800
504	2006-01-31 13:03:45	2006-01-31 13:33:45	2006-01-31 17:00:00	1.56881	3.4	10.3	2006-01-31 13:18:45	2006-01-31 13:30:00	2006-02-01	14	14	13	10778.6
505	2006-02-01 06:00:00	2006-02-01 11:29:59	2006-02-01 17:00:00	0.299998	1	13.7	2006-02-01 18:00:00	2006-02-02 16:00:00	2006-02-02 19:00:00	13.75	17	15	19575
506	2006-02-01 23:00:00	2006-02-02 13:29:58	2006-02-02 20:00:00	0.999805	7.3	13.3	2006-02-02 08:00:00	2006-02-03 17:15:00	2006-02-03 20:00:00	13.25	18	14	105984
507	2006-03-25 19:12:00	2006-03-25 19:42:00	2006-03-26 03:00:00	0.404444	1.1	2.4	2006-03-25 20:00:00	2006-03-26 00:45:00	2006-03-26 14:00:00	21.25	30	19	274078
508	2006-03-28 22:00:00	2006-03-29 06:29:57	2006-03-29 17:00:00	1.69986	8.7	1.7	2006-03-28 22:00:00	2006-03-29 08:15:00	2006-03-29 22:00:00	30	49	35.25	368740
509	2006-04-01 08:00:00	2006-04-01 17:30:10	2006-04-01 22:00:00	0.4	2.3	9.7	2006-04-01 13:00:00	2006-04-01 23:45:00	2006-04-02 15:00:00	21.75	24	20	151486
510	2006-07-10 14:00:00	2006-07-10 17:30:03	2006-07-10 19:00:00	0.1	0.4	7.9	2006-07-10 14:00:00	2006-07-11 04:30:00	2006-07-11 17:00:00	18.25	25	19	251106
511	2006-07-30 11:00:00	2006-07-30 15:29:58	2006-07-30 20:00:00	10.2965	20.4	2.2	2006-07-30 19:00:00	2006-07-30 19:45:00	2006-07-30 22:00:00	16.5	22	17.25	23681.2
512	2006-07-31 12:30:00	2006-07-31 18:29:57	2006-07-31 19:00:00	0.699932	1.7	20.4	2006-07-31 19:00:00	2006-07-31 22:00:00	2006-08-01 06:00:00	14.75	20	15	75231.8
513	2006-08-01 11:00:00	2006-08-01 15:29:58	2006-08-01 18:00:00	2.49923	6.8	22.1	2006-08-01 11:15:00	2006-08-01 11:15:00	2006-08-01 19:00:00	16	16	14	2990.32
514	2006-08-02 14:10:00	2006-08-02 18:29:57	2006-08-02 20:00:00	8.29557	12.6	28.9	2006-08-02 20:00:00	2006-08-02 21:45:00	2006-08-03 02:00:00	13.75	73	16.5	242316
515	2006-08-03 05:30:00	2006-08-03 12:50:01	2006-08-03 14:00:00	0.233272	1.1	41.5	2006-08-03 05:45:00	2006-08-03 05:45:00	2006-08-03 18:00:00	16	16	14	14730.6
516	2006-08-05 18:15:00	2006-08-05 19:29:59	2006-08-05 20:00:00	1.39983	1.8	23.6	2006-08-06 07:00:00	2006-08-06 12:30:00	2006-08-06 16:00:00	11.75	13	12	9687.5
517	2006-08-06 14:00:00	2006-08-06 14:30:00	2006-08-06 17:00:00	0.3	0.5	23.7	2006-08-07 09:00:00	2006-08-07 15:15:00	2006-08-07 19:00:00	11.5	59	15	231818
518	2006-09-07 08:00:00	2006-09-07 12:30:04	2006-09-07 16:00:00	0.999469	4.7	0.6	2006-09-07 14:00:00	2006-09-07 14:30:00	2006-09-08 16:00:00	10.5	11	10	62922.1
519	2006-10-06 13:01:04	2006-10-06 15:30:00	2006-10-06 22:00:00	20.499	63.6	4.2	2006-10-06 15:00:00	2006-10-07 04:15:00	2006-10-07 23:00:00	12.5	23	15	371943
520	2006-10-09 06:00:00	2006-10-09 13:29:56	2006-10-09 18:00:00	1.09965	4.6	65.9	2006-10-09 10:00:00	2006-10-10 08:30:00	2006-10-11 02:00:00	14	30	17	462448
521	2006-10-14 17:00:00	2006-10-14 20:30:03	2006-10-14 23:00:00	0.6	2.3	19.6	2006-10-14 20:00:00	2006-10-15 06:15:00	2006-10-15 14:00:00	15.5	18	16	62331.3
522	2006-10-15 06:00:00	2006-10-16 02:02:44	2006-10-16 05:00:00	0.1	2.2	17.3	2006-10-15 06:00:00	2006-10-17 05:00:00	2006-10-18 03:00:00	17.75	28	20	473515
523	2006-10-16 15:00:00	2006-10-17 14:29:57	2006-10-17 22:00:00	5.59959	48.5	9.7	2006-10-16 16:00:00	2006-10-17 07:30:00	2006-10-18 12:00:00	15	31	18	793703
524	2006-11-12 12:00:00	2006-11-12 12:30:00	2006-11-12 14:00:00	0.1	0.3	0	2006-11-12 12:15:00	2006-11-12 12:15:00	2006-11-12 18:00:00	12	12	11	7630.43
525	2006-11-14	2006-11-14 07:30:02	2006-11-14 11:00:00	0.599936	2.7	0.5	2006-11-14 00:15:00	2006-11-14 00:15:00	2006-11-14 22:00:00	13	13	12	33837.9
526	2006-12-11 12:04:00	2006-12-11 12:34:00	2006-12-11 15:00:00	1.44669	2.7	5.1	2006-12-11 14:00:00	2006-12-12 13:15:00	2006-12-12 17:00:00	12.25	16	10.75	51737.5
527	2006-12-19 03:00:00	2006-12-19 04:30:01	2006-12-19 10:00:00	0.299967	1.2	6.4	2006-12-19 11:00:00	2006-12-19 19:00:00	2006-12-20 09:00:00	7.975	12	2.85	225166
528	2006-12-22 10:00:00	2006-12-22 10:30:00	2006-12-22 15:00:00	0.2	0.7	7.6	2006-12-22 10:00:00	2006-12-22 16:00:00	2006-12-22 20:00:00	8.5	11	10	22983.8
529	2007-01-04 19:00:00	2007-01-04 21:30:02	2007-01-05 17:00:00	0.999802	6.1	0	2007-01-05 14:00:00	2007-01-06 14:15:00	2007-01-06 16:00:00	12	30	9.975	39704.9
530	2007-01-20 19:10:00	2007-01-20 20:29:59	2007-01-21 01:00:00	0.999999	3.5	0	2007-01-20 19:25:00	2007-01-20 19:30:00	2007-01-21 02:00:00	16	16	13	484.615
531	2007-01-21 06:00:00	2007-01-21 06:30:00	2007-01-21 10:00:00	0.1	0.5	3.5	2007-01-21 10:00:00	2007-01-21 21:45:00	2007-01-22 06:00:00	13	14	6.675	192406
532	2007-02-11 19:15:00	2007-02-11 20:29:59	2007-02-11 21:00:00	2.49964	2.9	0	2007-02-11 21:00:00	2007-02-11 22:45:00	2007-02-12 04:00:00	19	20	17	26100
533	2007-03-28 13:00:00	2007-03-28 20:30:02	2007-03-29 19:00:00	0.2	3.5	3.6	2007-03-28 15:00:00	2007-03-28 22:00:00	2007-03-29 20:00:00	24.5	27	23	98402.6
534	2007-04-08 08:15:00	2007-04-08 17:30:02	2007-04-08 20:00:00	4.49825	12	0	2007-04-08 09:00:00	2007-04-09 01:45:00	2007-04-09 13:00:00	37	48	41	325221
535	2007-07-23 15:00:00	2007-07-23 19:29:58	2007-07-23 23:00:00	2.59922	7.9	0.1	2007-07-23 22:00:00	2007-07-24 11:45:00	2007-07-26 23:00:00	11.25	14	11	555026
536	2007-07-24 19:10:00	2007-07-25 00:29:58	2007-07-25 03:00:00	1.19993	4.5	8.1	2007-07-25 01:00:00	2007-07-25 18:15:00	2007-07-26 07:00:00	12	20	13	153390
537	2007-07-31 11:00:00	2007-07-31 23:30:02	2007-08-01 05:00:00	0.999442	2.9	3.6	2007-07-31 12:00:00	2007-07-31 12:30:00	2007-08-01 07:00:00	11.25	12	11	8624.01
538	2007-08-02 07:04:17	2007-08-02 08:29:59	2007-08-02 20:00:00	2.29992	16.7	3.1	2007-08-02 08:00:00	2007-08-02 19:15:00	2007-08-03 15:00:00	11.5	30	14.25	391937
539	2007-08-15 13:00:00	2007-08-15 13:30:00	2007-08-15 15:00:00	0.1	0.3	1.3	2007-08-15 17:00:00	2007-08-15 18:00:00	2007-08-16 16:00:00	9.425	14	10	150328
540	2007-08-26 13:00:00	2007-08-26 18:29:59	2007-08-27 05:00:00	0.499994	3	0	2007-08-27	2007-08-27 19:15:00	2007-08-29	7.25	13	8.65	244679
541	2007-09-22 09:00:00	2007-09-22 17:30:03	2007-09-22 23:00:00	3.6989	16	0	2007-09-22 12:00:00	2007-09-23 06:30:00	2007-09-23 22:00:00	8.5	20	11	527318
542	2007-10-05 12:12:00	2007-10-05 13:29:59	2007-10-05 19:00:00	0.599993	2.3	2.1	2007-10-05 21:00:00	2007-10-06 15:00:00	2007-10-07 22:00:00	10.4	13	10.8	246653
543	2007-11-30 10:00:00	2007-12-01 05:29:58	2007-12-02	2.79963	27.7	0	2007-11-30 12:00:00	2007-12-01 08:45:00	2007-12-02 07:00:00	9.86	17.6	6.73	817484
544	2007-12-06 19:20:00	2007-12-07 09:29:56	2007-12-07 16:00:00	2.19968	21.3	0	2007-12-06 21:00:00	2007-12-07 16:15:00	2007-12-08 06:00:00	11.575	22	13	319192
545	2007-12-20 19:30:00	2007-12-20 21:29:58	2007-12-22 01:00:00	1.3998	7.1	0.5	2007-12-20 20:00:00	2007-12-22 13:00:00	2007-12-22 16:00:00	13.15	14.1	8.105	47240.5
546	2007-12-26 15:00:00	2007-12-26 15:30:00	2007-12-26 18:00:00	0.1	0.4	11.6	2007-12-26 15:15:00	2007-12-26 15:30:00	2007-12-26 20:00:00	11.1	13	9.0725	3639.85
547	2007-12-27 04:00:00	2007-12-27 04:30:00	2007-12-27 12:00:00	0.1	0.9	4.9	2007-12-27 04:00:00	2007-12-27 13:00:00	2007-12-28 01:00:00	9.78	11.5	7.3325	106358
548	2008-01-05 02:20:00	2008-01-05 05:29:55	2008-01-05 06:00:00	8.98882	10.7	0	2008-01-05 05:00:00	2008-01-05 16:45:00	2008-01-06 05:00:00	12.1	21	11.75	352845
549	2008-01-06 08:00:00	2008-01-06 16:29:57	2008-01-06 22:00:00	0.49993	3	11.4	2008-01-06 14:00:00	2008-01-06 16:45:00	2008-01-07 02:00:00	12.5	14.1	10.95	31680
550	2008-01-07 05:15:00	2008-01-07 05:45:00	2008-01-07 13:00:00	0.375	1.4	14.4	2008-01-07 08:00:00	2008-01-07 21:00:00	2008-01-08 07:00:00	9.78	14.1	5.18	271215
551	2008-01-08 23:00:00	2008-01-09 01:29:56	2008-01-09 17:00:00	2.2999	7.7	15.8	2008-01-08 23:00:00	2008-01-09 03:00:00	2008-01-09 22:00:00	15.6	16.7	11.025	112681
552	2008-01-25 10:30:00	2008-01-25 11:00:00	2008-01-25 13:00:00	0.133333	0.4	1.6	2008-01-25 11:00:00	2008-01-25 14:00:00	2008-01-25 17:00:00	13.425	17.6	12.8	40600.3
553	2008-01-27 13:00:00	2008-01-27 15:29:56	2008-01-27 18:00:00	0.399798	1	1.4	2008-01-27 14:00:00	2008-01-27 18:30:00	2008-01-27 21:00:00	12.2	14.5	13.6	15840
554	2008-01-27 23:20:00	2008-01-28 01:29:59	2008-01-28 04:00:00	0.599999	1.9	2.4	2008-01-28	2008-01-28 01:00:00	2008-01-28 10:00:00	13.6	14.1	12.9	13286.3
555	2008-01-28 12:07:30	2008-01-28 13:30:00	2008-01-29	2.49998	8.1	4.3	2008-01-28 14:00:00	2008-01-29 13:00:00	2008-01-29 16:00:00	13	17.6	10.1	43529.7
556	2008-01-29 16:00:00	2008-01-29 16:30:00	2008-01-30 08:00:00	0.2	1.5	12.4	2008-01-29 17:00:00	2008-01-30 13:30:00	2008-01-30 16:00:00	11.2	13.3	12.6	23685.7
557	2008-01-31 03:30:00	2008-01-31 05:29:58	2008-01-31 06:00:00	2.00444	2.4	12.9	2008-01-31 10:00:00	2008-01-31 15:00:00	2008-01-31 16:00:00	6.23	21	14.225	60724.1
558	2008-02-07 13:00:00	2008-02-07 15:30:02	2008-02-07 17:00:00	0.199934	0.6	15.1	2008-02-07 14:00:00	2008-02-08 10:45:00	2008-02-08 13:00:00	15.6	20	13.325	47173.2
559	2008-02-21 11:20:00	2008-02-21 11:50:00	2008-02-21 13:00:00	0.266667	0.5	2	2008-02-21 12:00:00	2008-02-21 15:00:00	2008-02-22 06:00:00	14.75	20	13.7	131869
560	2008-02-22 06:00:00	2008-02-22 14:30:03	2008-02-23 20:00:00	0.799806	6.8	2.5	2008-02-22 12:00:00	2008-02-24 18:30:00	2008-02-25 09:00:00	13.7	36.3	15.6	717013
561	2008-02-25 11:20:00	2008-02-25 11:50:00	2008-02-25 13:00:00	0.233333	0.4	15.7	2008-02-25 13:00:00	2008-02-25 17:30:00	2008-02-26 09:00:00	15.8	19.5	14.1	88709.6
562	2008-03-13 07:12:00	2008-03-13 07:42:00	2008-03-13 11:00:00	0.42	0.9	0	2008-03-13 10:00:00	2008-03-14 03:45:00	2008-03-14 17:00:00	18.2	22.6	19.875	180634
563	2008-03-30 11:00:00	2008-03-30 16:29:59	2008-03-31 04:00:00	3.19997	9.7	0	2008-03-30 17:00:00	2008-03-30 19:30:00	2008-03-31 05:00:00	30.675	34.8	31.775	89266.9
564	2008-06-04 12:03:19	2008-06-04 22:30:00	2008-06-05 09:00:00	3.19991	25.4	0.1	2008-06-04 13:00:00	2008-06-05 06:15:00	2008-06-05 10:00:00	158.5	182	156.5	409082
565	2008-08-30 17:00:00	2008-08-30 17:30:00	2008-08-30 20:00:00	0.5	1.2	2.7	2008-08-31 02:00:00	2008-08-31 13:30:00	2008-09-03 23:00:00	9.54	11.5	9.78	488074
566	2008-10-03 02:00:00	2008-10-03 02:30:00	2008-10-03 07:00:00	0.1	0.3	0.1	2008-10-03 03:00:00	2008-10-03 12:15:00	2008-10-04 02:00:00	8.105	8.84	8.275	15862.8
567	2008-10-04 06:30:00	2008-10-04 09:29:59	2008-10-04 21:00:00	1.5	10.6	0.4	2008-10-04 10:00:00	2008-10-05 03:15:00	2008-10-06 19:00:00	8.8125	16.7	10.5	608705
568	2008-10-11 03:12:00	2008-10-11 04:29:59	2008-10-11 05:00:00	0.974835	1.5	2.9	2008-10-11 04:00:00	2008-10-12 01:00:00	2008-10-13 14:00:00	10.7	12.4	9.09	355368
569	2008-10-11 14:30:00	2008-10-11 19:24:13	2008-10-12 01:00:00	0.5	3.3	1.5	2008-10-11 15:00:00	2008-10-12 07:45:00	2008-10-12 14:00:00	11.225	12.9	11.475	53819.5
570	2008-10-12 06:00:00	2008-10-13 01:57:43	2008-10-13 05:00:00	0.1	2.4	4.8	2008-10-12 07:00:00	2008-10-14 02:45:00	2008-10-14 11:00:00	12.525	14.2	11.6	49753.2
571	2008-11-01 11:30:00	2008-11-01 12:00:00	2008-11-01 15:00:00	0.2	0.7	0	2008-11-02 04:00:00	2008-11-02 14:45:00	2008-11-03 21:00:00	10.03	13.3	12.4	412793
572	2008-11-02 03:00:00	2008-11-02 05:30:02	2008-11-02 19:00:00	2.19954	12.4	0.7	2008-11-02 04:00:00	2008-11-02 18:15:00	2008-11-03	10.03	19.3	16.325	52186.3
573	2008-11-04 13:20:00	2008-11-04 13:50:00	2008-11-04 16:00:00	0.233333	0.5	13.1	2008-11-04 14:00:00	2008-11-04 20:30:00	2008-11-04 22:00:00	12.775	14.7	13.9	11169.1
574	2008-11-05 05:20:00	2008-11-05 11:29:58	2008-11-05 15:00:00	0.79975	2.4	13.6	2008-11-05 05:35:00	2008-11-05 05:45:00	2008-11-05 17:00:00	13.3	13.3	12.3	10585
575	2008-11-26 07:00:00	2008-11-26 15:29:57	2008-11-26 17:00:00	0.39979	1.4	0	2008-11-26 10:00:00	2008-11-27 13:15:00	2008-11-27 18:00:00	11	12.9	12.4	27007
576	2008-12-08 15:00:00	2008-12-08 17:29:56	2008-12-09 09:00:00	0.599899	5.5	0.3	2008-12-08 15:15:00	2008-12-08 15:30:00	2008-12-09 10:00:00	12	12.4	6.76	112176
577	2008-12-15 11:00:00	2008-12-15 18:30:02	2008-12-16 16:00:00	0.399936	3.6	6.9	2008-12-15 11:00:00	2008-12-15 15:45:00	2008-12-16 18:00:00	3.7275	12.9	9.18	116988
578	2008-12-17 21:00:00	2008-12-18 03:30:01	2008-12-18 16:00:00	0.699845	5.7	10.7	2008-12-17 23:00:00	2008-12-19 14:15:00	2008-12-19 22:00:00	8.3625	12.9	10.12	90637.7
579	2008-12-22 09:00:00	2008-12-22 14:30:05	2008-12-23 02:00:00	0.999501	5.8	6.2	2008-12-22 09:00:00	2008-12-22 10:30:00	2008-12-23 05:00:00	11.8	12.4	6.22	178376
580	2009-01-05 12:00:00	2009-01-05 17:20:34	2009-01-05 23:00:00	0.2	2	3.3	2009-01-05 12:00:00	2009-01-06 16:15:00	2009-01-07	7.25	18.8	13.2	254209
581	2009-01-08 22:30:00	2009-01-08 23:29:57	2009-01-09 03:00:00	0.299933	0.9	5.3	2009-01-08 22:45:00	2009-01-08 22:45:00	2009-01-09 07:00:00	13.3	12.9	12.4	1710
582	2009-01-23 10:00:00	2009-01-23 12:29:56	2009-01-23 13:00:00	0.699395	1	0	2009-01-23 11:00:00	2009-01-23 16:45:00	2009-01-23 18:00:00	15.575	18.2	16.575	7826.79
583	2009-01-24 03:06:00	2009-01-24 07:29:58	2009-01-24 18:00:00	1.39945	8.7	1	2009-01-24 09:00:00	2009-01-24 19:30:00	2009-01-25 02:00:00	14.7	22.1	19.425	107901
584	2009-02-23 08:00:00	2009-02-23 11:30:03	2009-02-23 16:00:00	1.8993	4.6	1.8	2009-02-23 08:00:00	2009-02-23 21:15:00	2009-02-24 08:00:00	14.45	25.2	20.25	282148
585	2009-03-25 20:00:00	2009-03-26 02:30:01	2009-03-26 05:00:00	1.4	8	7.6	2009-03-25 20:00:00	2009-03-25 21:15:00	2009-03-26 17:00:00	25.35	27.1	18.5	155754
586	2009-05-02 04:00:00	2009-05-02 13:29:58	2009-05-02 15:00:00	1.69941	3.2	2.3	2009-05-02 04:00:00	2009-05-03 03:00:00	2009-05-03 15:00:00	72.2	98.1	87	791614
587	2009-06-17 12:00:00	2009-06-17 15:29:57	2009-06-17 20:00:00	0.199932	0.8	9.7	2009-06-17 13:00:00	2009-06-17 14:30:00	2009-06-18 02:00:00	56.4	58.8	54.975	16929.1
588	2009-06-18 06:00:00	2009-06-18 11:29:59	2009-06-19 05:00:00	1.09998	3.4	10.5	2009-06-18 07:00:00	2009-06-18 11:15:00	2009-06-19 08:00:00	55.45	58.8	55.475	45324.7
589	2009-06-20 13:08:34	2009-06-20 15:29:59	2009-06-21 03:00:00	2.39984	9.5	5.2	2009-06-20 17:00:00	2009-06-20 19:30:00	2009-06-21 04:00:00	58.55	73.3	59.8	186732
590	2009-08-23 06:00:00	2009-08-24 01:57:43	2009-08-24 05:00:00	0.1	2.4	0	2009-08-23 06:00:00	2009-08-24 14:30:00	2009-08-26 22:00:00	7.58	9.94	7.41	395572
591	2009-09-02 13:00:00	2009-09-02 15:30:02	2009-09-02 20:00:00	0.699604	1.5	0.1	2009-09-03	2009-09-03 18:15:00	2009-09-04 18:00:00	7.6675	11.1	8.3625	153240
592	2009-10-24 20:00:00	2009-10-24 20:30:00	2009-10-24 22:00:00	0.2	0.4	4.1	2009-10-24 20:00:00	2009-10-24 20:30:00	2009-10-25 07:00:00	10.12	10.3	9.94	2418.95
593	2009-10-27 10:30:00	2009-10-27 11:00:00	2009-10-27 16:00:00	0.15	0.5	0.4	2009-10-27 16:00:00	2009-10-27 19:30:00	2009-10-28 17:00:00	10.3	11.1	7.665	112444
594	2009-10-28 01:00:00	2009-10-28 02:30:01	2009-10-29	0.499934	6.3	0.9	2009-10-28 01:15:00	2009-10-28 01:45:00	2009-10-29 08:00:00	10.7	11.1	6.295	32991.2
595	2009-11-12 20:00:00	2009-11-12 22:29:56	2009-11-13 07:00:00	3.69964	9.1	0	2009-11-12 21:00:00	2009-11-13 07:00:00	2009-11-13 10:00:00	10.7	16.2	14.575	53548.7
596	2009-11-14 10:10:00	2009-11-14 12:30:01	2009-11-14 23:00:00	2.29934	6.9	16.6	2009-11-14 18:00:00	2009-11-14 23:30:00	2009-11-15 08:00:00	11	12.4	4.4	114354
597	2010-01-20 00:30:00	2010-01-20 04:30:01	2010-01-20 12:00:00	2.79932	7.6	1.1	2010-01-20 00:45:00	2010-01-20 00:45:00	2010-01-20 15:00:00	10.3	10.3	10.21	1710.24
598	2010-01-21 12:00:00	2010-01-21 20:29:57	2010-01-22 05:00:00	2.79902	12.8	9	2010-01-21 16:00:00	2010-01-21 21:15:00	2010-01-22 11:00:00	10.03	10.7	10.3	16932.6
599	2010-02-05 22:30:00	2010-02-05 23:29:57	2010-02-06 05:00:00	0.599732	1.6	0	2010-02-06	2010-02-06 17:30:00	2010-02-06 19:00:00	10.21	11.6	11	2036.37
600	2010-02-06 18:30:00	2010-02-06 19:29:57	2010-02-06 21:00:00	1.3992	2.1	1.7	2010-02-06 18:45:00	2010-02-06 18:45:00	2010-02-07 02:00:00	11.1	11.1	10.6	4687.76
601	2010-02-19 04:00:00	2010-02-19 23:30:04	2010-02-20 12:00:00	1.89949	17.9	0.4	2010-02-19 04:00:00	2010-02-20 05:00:00	2010-02-20 15:00:00	11.225	13.3	9.94	124345
602	2010-02-20 17:00:00	2010-02-20 21:31:22	2010-02-20 23:00:00	4.01386	5	18.3	2010-02-20 17:00:00	2010-02-20 19:15:00	2010-02-21 04:00:00	10.12	11.6	11.1	12415.9
603	2010-02-21 08:00:00	2010-02-21 10:30:02	2010-02-21 20:00:00	1.39941	6.8	23.3	2010-02-21 12:00:00	2010-02-22 19:00:00	2010-02-23 08:00:00	11.1	12.4	2.9025	492237
604	2010-03-26 03:00:00	2010-03-26 04:30:01	2010-03-26 11:00:00	0.499868	2.1	0.7	2010-03-26 03:00:00	2010-03-26 06:00:00	2010-03-26 15:00:00	18.65	19.3	18.65	8820
605	2010-03-26 20:00:00	2010-03-26 21:29:55	2010-03-26 22:00:00	0.299866	0.6	2.8	2010-03-26 20:15:00	2010-03-26 21:00:00	2010-03-27 01:00:00	18.8	19.3	18.925	3739.14
606	2010-04-13 08:20:00	2010-04-13 11:30:01	2010-04-13 16:00:00	0.299968	1.1	3.1	2010-04-13 13:00:00	2010-04-13 23:00:00	2010-04-14 10:00:00	53.775	74.4	49.05	521831
607	2010-04-23 11:06:39	2010-04-23 11:36:39	2010-04-23 14:00:00	0.955417	1.7	10.8	2010-04-23 12:00:00	2010-04-23 21:30:00	2010-04-24 01:00:00	68.475	73.3	65.575	92904.2
608	2010-04-30 08:00:00	2010-04-30 08:30:00	2010-04-30 11:00:00	0.5	1	11.7	2010-04-30 08:15:00	2010-04-30 08:30:00	2010-04-30 13:00:00	72.2	77.7	70.825	37098.9
609	2010-05-01 20:30:00	2010-05-02 10:30:01	2010-05-02 15:00:00	4.39877	8.2	13.5	2010-05-01 21:00:00	2010-05-02 01:00:00	2010-05-02 18:00:00	67.675	75.5	61.8	234913
610	2010-05-18 08:15:00	2010-05-18 12:29:56	2010-05-18 17:00:00	1.7993	6.2	1.2	2010-05-18 10:00:00	2010-05-19 02:00:00	2010-05-19 03:00:00	116.5	137	130.25	163654
611	2010-05-24 11:12:00	2010-05-24 11:42:00	2010-05-24 13:00:00	0.44	0.7	0	2010-05-24 11:27:00	2010-05-24 12:00:00	2010-05-24 16:00:00	132	135	120.75	17325
612	2010-07-26 12:30:00	2010-07-26 15:29:59	2010-07-26 19:00:00	1.89999	5.2	5.4	2010-07-26 13:00:00	2010-07-27 18:30:00	2010-07-28 07:00:00	28.625	140	26.85	527759
613	2010-10-03 11:30:00	2010-10-03 13:29:58	2010-10-03 19:00:00	0.399932	1.6	0.3	2010-10-03 16:00:00	2010-10-04 00:30:00	2010-10-04 16:00:00	10.275	53.9	18.2	715192
614	2010-10-04 08:03:19	2010-10-05 11:30:02	2010-10-06 04:00:00	5.0975	29.3	1.9	2010-10-04 17:00:00	2010-10-05 15:00:00	2010-10-06 12:00:00	18.325	50.5	24.75	754435
615	2010-10-18 02:00:00	2010-10-18 07:29:59	2010-10-18 10:00:00	0.199998	1	0	2010-10-18 03:00:00	2010-10-18 13:45:00	2010-10-19 16:00:00	15	18	15.1	163935
616	2010-10-19 01:00:00	2010-10-19 01:30:00	2010-10-19 04:00:00	0.2	0.6	1.2	2010-10-19 01:15:00	2010-10-19 02:00:00	2010-10-19 16:00:00	15.5	16.4	15.1	20715.3
617	2010-10-22	2010-10-22 06:30:01	2010-10-22 09:00:00	0.999907	3.5	2.6	2010-10-22	2010-10-22 00:45:00	2010-10-22 12:00:00	16.975	19.7	16.8	28864.7
618	2010-10-22 15:00:00	2010-10-22 16:30:01	2010-10-22 19:00:00	1.1998	2.5	6.1	2010-10-22 15:00:00	2010-10-23 03:00:00	2010-10-23 13:00:00	17.4	19.7	17.1	65482.2
619	2010-10-23 12:00:00	2010-10-23 18:30:01	2010-10-23 22:00:00	1.89953	4.1	8.6	2010-10-23 17:00:00	2010-10-24 02:45:00	2010-10-24 16:00:00	17.1	53.9	20.5	449178
620	2010-11-28 19:30:00	2010-11-29 06:29:57	2010-11-29 11:00:00	0.599929	3.4	9.4	2010-11-28 21:00:00	2010-11-28 21:45:00	2010-11-29 12:00:00	11.375	13.6	9.64	66182.6
621	2010-12-15 05:05:00	2010-12-15 05:35:00	2010-12-15 07:00:00	1.19174	2.3	0	2010-12-15 05:20:00	2010-12-15 05:45:00	2010-12-15 11:00:00	15.5	15.9	15.5	1800
622	2010-12-30 05:30:00	2010-12-31 03:50:06	2010-12-31 05:00:00	0.3	3.1	17	2010-12-30 11:00:00	2010-12-30 12:45:00	2010-12-31 08:00:00	8.17	10.5	4.26	88779.1
623	2010-12-31 12:20:00	2010-12-31 13:29:58	2010-12-31 14:00:00	0.799832	1.1	20.1	2010-12-31 13:00:00	2010-12-31 14:15:00	2010-12-31 16:00:00	8.2525	9.46	7.08	5384.06
624	2011-03-07 11:15:00	2011-03-07 12:45:13	2011-03-07 23:00:00	5.6	16.9	1.5	2011-03-07 13:00:00	2011-03-08 20:30:00	2011-03-09 08:00:00	19.4	24.6	8.42	766694
625	2011-03-16 21:01:37	2011-03-16 22:29:55	2011-03-17 03:00:00	4.29932	11.5	0	2011-03-16 22:00:00	2011-03-17 02:30:00	2011-03-17 13:00:00	58.825	98.1	60.95	694380
626	2011-03-27 21:00:00	2011-03-28 05:49:59	2011-03-28 20:00:00	0.233331	2.1	8.3	2011-03-27 22:00:00	2011-03-29 19:45:00	2011-03-30	32.8	36.8	33.8	81261
627	2011-04-03 01:30:00	2011-04-03 13:29:58	2011-04-03 17:00:00	1.39985	9.7	0	2011-04-03 01:45:00	2011-04-03 02:00:00	2011-04-04 08:00:00	149	157	78.45	552803
628	2011-04-13 17:30:00	2011-04-13 21:30:07	2011-04-14 05:00:00	1.7	8.5	26.7	2011-04-13 19:00:00	2011-04-14 18:30:00	2011-04-15 11:00:00	106.25	138	110.25	1.8848e+06
629	2011-04-18 14:01:49	2011-04-18 14:31:49	2011-04-19 09:00:00	3.23028	11.8	11.3	2011-04-18 15:00:00	2011-04-19 00:30:00	2011-04-19 17:00:00	183	301	206.5	3.23099e+06
630	2011-04-20 20:12:00	2011-04-20 21:29:59	2011-04-21 01:00:00	3.19981	5.7	11.8	2011-04-20 21:00:00	2011-04-21 19:15:00	2011-04-22 02:00:00	224.75	306	241	3.18929e+06
631	2011-04-30 13:10:00	2011-04-30 13:40:00	2011-04-30 15:00:00	0.516667	0.7	18.6	2011-04-30 14:00:00	2011-04-30 19:00:00	2011-05-01 02:00:00	156	160	154.75	91242.2
632	2011-05-18 00:30:00	2011-05-18 09:30:01	2011-05-19 22:00:00	3.69946	46.2	1	2011-05-18 01:00:00	2011-05-20 21:15:00	2011-05-21 14:00:00	277.75	421	286	5.8958e+06
633	2011-05-20 05:10:00	2011-05-20 18:29:56	2011-05-20 19:00:00	0.599789	4.6	47.2	2011-05-20 06:00:00	2011-05-21 00:15:00	2011-05-21 14:00:00	259	461	286	5.84732e+06
634	2011-05-22 16:20:00	2011-05-22 19:44:56	2011-05-23	0.324953	1.4	50.8	2011-05-22 18:00:00	2011-05-23 06:30:00	2011-05-23 12:00:00	337.75	430	373.25	1636625
635	2011-07-07 23:30:00	2011-07-08 01:29:58	2011-07-08 06:00:00	0.399932	0.9	4.2	2011-07-08	2011-07-08 04:45:00	2011-07-08 16:00:00	136.25	215	142.25	798469
636	2011-07-25 13:30:00	2011-07-26 09:29:56	2011-07-26 10:00:00	1.19954	8.5	0	2011-07-25 17:00:00	2011-07-26 15:00:00	2011-07-28 19:00:00	64	80.8	65	2.41777e+06
637	2011-07-27 13:12:00	2011-07-27 14:29:59	2011-07-28	3.19981	9.2	15.1	2011-07-27 16:00:00	2011-07-27 20:15:00	2011-07-28 06:00:00	71.825	186	74.675	672879
638	2011-07-30 13:04:36	2011-07-30 16:29:56	2011-07-31 21:00:00	1.79908	11.8	24.4	2011-07-30 14:00:00	2011-07-31 16:30:00	2011-07-31 22:00:00	61.425	118	63.6	337967
639	2011-08-01 12:00:00	2011-08-01 12:30:00	2011-08-01 16:00:00	0.1	0.3	27.7	2011-08-01 12:15:00	2011-08-01 12:45:00	2011-08-01 20:00:00	62.8	62.8	56.325	10050.6
640	2011-08-21 12:10:00	2011-08-21 13:29:59	2011-08-21 17:00:00	1.1	2.1	0	2011-08-21 13:00:00	2011-08-21 13:30:00	2011-08-21 22:00:00	30.6	31.1	28.55	7862.5
641	2011-08-24 11:20:00	2011-08-24 13:29:59	2011-08-24 15:00:00	1.49999	3	2.1	2011-08-24 13:00:00	2011-08-24 16:00:00	2011-08-25 01:00:00	28.1	31.6	28.9	32490
642	2011-08-25 13:00:00	2011-08-25 14:29:55	2011-08-25 15:00:00	0.799732	1.5	5.1	2011-08-25 13:00:00	2011-08-25 18:45:00	2011-08-26 01:00:00	30.225	68.4	30.35	240681
643	2011-09-14 08:00:00	2011-09-14 10:30:02	2011-09-14 17:00:00	1.6998	7	4	2011-09-14 08:00:00	2011-09-14 19:30:00	2011-09-15 06:00:00	24.45	41.4	27.825	345115
644	2011-09-16 09:00:00	2011-09-16 17:29:57	2011-09-17 15:00:00	1.69979	18.1	10.4	2011-09-16 09:00:00	2011-09-17 06:30:00	2011-09-17 21:00:00	26.15	90.4	30.1	1722320
645	2011-10-01 16:06:39	2011-10-01 16:36:39	2011-10-01 19:00:00	0.911083	1.6	0	2011-10-01 18:00:00	2011-10-01 19:15:00	2011-10-01 22:00:00	34.475	49.7	33.6	41377.5
646	2011-10-03 19:07:30	2011-10-03 19:37:30	2011-10-03 21:00:00	0.7125	0.9	1.7	2011-10-03 20:00:00	2011-10-03 20:45:00	2011-10-04 05:00:00	35.325	35.7	27.15	16095
647	2011-10-05 13:03:00	2011-10-05 22:29:58	2011-10-06 20:00:00	3.79862	32.5	2.6	2011-10-05 14:00:00	2011-10-06 05:00:00	2011-10-06 22:00:00	25.6	76.2	30.6	881942
648	2011-10-08 04:00:00	2011-10-08 09:29:59	2011-10-08 16:00:00	0.499996	2.1	33.5	2011-10-08 04:00:00	2011-10-09	2011-10-09 03:00:00	27.825	29.1	27.75	22837.7
649	2011-10-25 14:20:00	2011-10-25 21:29:59	2011-10-26 05:00:00	1.89997	9	0	2011-10-25 15:00:00	2011-10-26 01:45:00	2011-10-26 16:00:00	26.175	38.5	26.6	290860
650	2011-11-06 16:30:00	2011-11-06 19:29:59	2011-11-06 23:00:00	1.09999	2.7	0.2	2011-11-06 17:00:00	2011-11-06 21:45:00	2011-11-07 03:00:00	24	26.4	23.8	30456
651	2011-11-07 06:00:00	2011-11-07 12:30:01	2011-11-08 01:00:00	2.19969	8.7	2.9	2011-11-07 07:00:00	2011-11-08 15:45:00	2011-11-08 18:00:00	23.8	25.1	22.9	24697.9
652	2011-12-05 01:00:00	2011-12-05 01:30:00	2011-12-05 05:00:00	0.1	0.5	7.7	2011-12-05 01:15:00	2011-12-05 01:30:00	2011-12-05 09:00:00	17.1	16.8	14.45	5068.31
653	2011-12-22 05:30:00	2011-12-22 08:28:59	2011-12-22 14:00:00	0.2	1.4	0	2011-12-22 07:00:00	2011-12-23 13:30:00	2011-12-24 02:00:00	15.875	17.5	8.905	198001
654	2012-03-06 20:20:00	2012-03-06 21:29:58	2012-03-07 18:00:00	0.699866	4.2	9.2	2012-03-06 21:00:00	2012-03-08 16:45:00	2012-03-09 08:00:00	27.725	28.7	12.3	390610
655	2012-03-26 05:05:00	2012-03-26 05:35:00	2012-03-26 07:00:00	1.17519	2.2	0	2012-03-26 05:20:00	2012-03-26 05:30:00	2012-03-26 08:00:00	62.8	62.8	60.625	4167
656	2012-04-26 19:20:00	2012-04-27 00:30:03	2012-04-27 04:00:00	3.79801	6.7	0.1	2012-04-26 20:00:00	2012-04-27 05:45:00	2012-04-27 07:00:00	130.5	149	135.5	192436
657	2012-07-13 23:30:00	2012-07-14 16:38:05	2012-07-14 19:00:00	0.4	2.9	4.6	2012-07-14	2012-07-14 13:15:00	2012-07-14 23:00:00	26.275	27.7	25.3	63837.9
658	2012-07-15 11:15:00	2012-07-15 15:30:02	2012-07-15 18:00:00	0.999836	3.4	7.6	2012-07-15 11:30:00	2012-07-15 12:00:00	2012-07-15 22:00:00	26.8	27.7	25.3	10407.9
659	2012-07-16 11:00:00	2012-07-16 17:30:01	2012-07-16 19:00:00	3.79956	8.1	11	2012-07-16 13:00:00	2012-07-16 21:15:00	2012-07-17	26.15	50.3	30.6	57897.6
660	2012-07-20 14:15:00	2012-07-20 14:45:00	2012-07-20 16:00:00	0.325	0.5	11.6	2012-07-20 14:30:00	2012-07-20 14:30:00	2012-07-20 17:00:00	24.7	24.2	22.9	207
661	2012-07-21 11:00:00	2012-07-21 11:30:00	2012-07-21 18:00:00	0.8	1.5	12	2012-07-21 11:00:00	2012-07-22 01:30:00	2012-07-22 19:00:00	24	32.6	25.3	340340
662	2012-07-27 05:20:00	2012-07-27 05:50:00	2012-07-27 13:00:00	0.3	1.3	7	2012-07-27 08:00:00	2012-07-27 09:45:00	2012-07-27 22:00:00	22.9	23.4	20.7	19867.5
663	2012-07-27 18:00:00	2012-07-27 18:30:00	2012-07-27 20:00:00	0.1	0.3	6.8	2012-07-27 23:00:00	2012-07-28 10:15:00	2012-07-28 21:00:00	21	22.6	20.675	64786.7
664	2012-07-28 12:00:00	2012-07-28 13:36:13	2012-07-28 20:00:00	0.8	3.6	6.9	2012-07-28 12:15:00	2012-07-28 13:15:00	2012-07-28 21:00:00	22.2	22.6	20.675	6493.82
665	2012-07-30 10:30:00	2012-07-30 16:30:03	2012-07-31 02:00:00	2.49951	20.4	5.9	2012-07-30 11:00:00	2012-07-31 17:30:00	2012-08-01 08:00:00	22.2	59.7	30.725	757324
666	2012-08-05 11:10:00	2012-08-05 11:40:00	2012-08-05 16:00:00	0.55	1.3	7.8	2012-08-05 11:25:00	2012-08-05 11:30:00	2012-08-05 19:00:00	20.7	20.7	19.825	2861.25
667	2012-08-06 12:00:00	2012-08-06 16:20:57	2012-08-06 19:00:00	1	4.7	3.3	2012-08-06 18:00:00	2012-08-07 01:30:00	2012-08-07 18:00:00	18.725	20.3	17.65	97917.7
668	2012-08-13 06:20:00	2012-08-14 16:30:01	2012-08-14 19:00:00	7.99595	23.9	0.1	2012-08-13 10:00:00	2012-08-14 22:00:00	2012-08-15 11:00:00	17.3	43.2	18.825	351550
669	2012-08-21 14:12:00	2012-08-21 14:42:00	2012-08-21 16:00:00	0.44	0.7	4.6	2012-08-21 17:00:00	2012-08-21 18:00:00	2012-08-21 22:00:00	15.875	16.5	16.025	2551.5
670	2012-08-23 05:20:00	2012-08-23 12:29:53	2012-08-23 21:00:00	1.19941	8	4.6	2012-08-23 06:00:00	2012-08-23 21:45:00	2012-08-24 18:00:00	16.5	22.2	16.95	186463
671	2012-08-24 14:03:45	2012-08-24 14:33:45	2012-08-24 16:00:00	1.59375	3.1	9.6	2012-08-24 19:00:00	2012-08-25	2012-08-25 08:00:00	17.475	30.1	20.6	121329
672	2012-10-12 03:00:00	2012-10-12 05:30:02	2012-10-13 04:00:00	2.89848	16.2	0.2	2012-10-12 03:00:00	2012-10-12 13:45:00	2012-10-13 19:00:00	12.3	17.8	13.5	248965
673	2012-11-11 07:00:00	2012-11-11 11:29:58	2012-11-11 13:00:00	0.199965	0.8	22	2012-11-11 09:00:00	2012-11-11 15:30:00	2012-11-13 09:00:00	9.285	17.5	8.4775	226869
674	2012-11-16 14:30:00	2012-11-16 15:00:00	2012-11-16 19:00:00	0.2	0.8	0.8	2012-11-16 15:00:00	2012-11-16 20:15:00	2012-11-16 21:00:00	14.825	15.5	14.975	3667.5
675	2012-12-09 05:20:00	2012-12-09 09:06:35	2012-12-09 14:00:00	0.3	2.2	0	2012-12-09 12:00:00	2012-12-10 13:45:00	2012-12-11 04:00:00	12.975	15.2	12.6	127292
676	2012-12-24 05:15:00	2012-12-24 10:30:04	2012-12-24 17:00:00	0.999537	6.3	13.6	2012-12-24 10:00:00	2012-12-25 14:00:00	2012-12-25 23:00:00	13.55	14.9	10.75	63123.4
677	2012-12-26 07:30:00	2012-12-26 09:58:50	2012-12-27 17:00:00	0.2	3.8	6.4	2012-12-26 10:00:00	2012-12-28 12:00:00	2012-12-28 22:00:00	12.675	15.5	11.575	364718
678	2013-01-24 11:00:00	2013-01-24 12:30:01	2013-01-24 15:00:00	0.599934	1.7	0	2013-01-24 12:00:00	2013-01-25 15:00:00	2013-01-26 03:00:00	14.15	16.8	15.05	204795
679	2013-03-08 09:20:00	2013-03-08 13:30:02	2013-03-08 17:00:00	1.49948	4.6	3.4	2013-03-08 11:00:00	2013-03-08 17:30:00	2013-03-08 21:00:00	22.4	24.2	23.7	10793.3
680	2013-03-09 00:20:00	2013-03-09 15:29:57	2013-03-09 16:00:00	1.6992	6.4	8	2013-03-09 00:35:00	2013-03-09 01:15:00	2013-03-09 17:00:00	23.4	23.8	22.2	8498.77
681	2013-07-11 10:20:00	2013-07-11 16:29:58	2013-07-11 17:00:00	2.89997	9.2	6.3	2013-07-11 11:00:00	2013-07-12	2013-07-12 20:00:00	34.225	42	35.325	288176
682	2013-07-16 14:00:00	2013-07-16 14:30:00	2013-07-16 16:00:00	0.2	0.5	17	2013-07-16 15:00:00	2013-07-16 16:00:00	2013-07-16 19:00:00	34.9	37.4	33.225	7998.75
683	2013-07-18 12:12:00	2013-07-18 12:42:00	2013-07-18 20:00:00	0.48	1.8	5.2	2013-07-18 16:00:00	2013-07-18 16:15:00	2013-07-18 21:00:00	35.75	36.8	32.475	5085
684	2013-07-19 11:00:00	2013-07-19 12:29:55	2013-07-19 13:00:00	0.599598	1	7	2013-07-19 12:00:00	2013-07-19 12:45:00	2013-07-19 21:00:00	33.1	33.6	30.225	19831.3
685	2013-07-25 05:07:30	2013-07-25 06:06:15	2013-07-25 12:00:00	0.8	2.4	9.3	2013-07-25 05:22:30	2013-07-25 05:45:00	2013-07-25 22:00:00	32.1	31.6	23.1	23215.9
686	2013-07-25 23:08:34	2013-07-25 23:38:34	2013-07-26 02:00:00	0.614278	1	10.8	2013-07-26 01:00:00	2013-07-26 08:15:00	2013-07-26 17:00:00	23.5	25.1	23.3	49997.8
687	2013-07-26 15:00:00	2013-07-26 17:29:56	2013-07-26 18:00:00	0.606004	0.8	11.8	2013-07-26 18:00:00	2013-07-27 07:00:00	2013-07-27 17:00:00	23.4	25.1	23.1	36332.6
688	2013-07-27 16:00:00	2013-07-27 16:30:00	2013-07-27 18:00:00	0.7	1.4	12.7	2013-07-27 18:00:00	2013-07-28 03:45:00	2013-07-28 13:00:00	23.4	24.7	23.7	23198.7
689	2013-07-28 13:00:00	2013-07-28 17:29:58	2013-07-29 07:00:00	8.39723	20.4	14.1	2013-07-28 19:00:00	2013-07-29 01:45:00	2013-07-29 17:00:00	23.1	46.4	22.1	512384
690	2013-08-17 14:00:00	2013-08-17 14:30:00	2013-08-17 22:00:00	3.2	6.1	1.2	2013-08-17 16:00:00	2013-08-18 07:15:00	2013-08-18 22:00:00	14	18.1	13.625	156943
691	2013-08-19 11:30:00	2013-08-19 14:29:53	2013-08-19 17:00:00	1.69914	5	10.5	2013-08-19 16:00:00	2013-08-19 19:30:00	2013-08-19 22:00:00	15.65	107	32.1	266353
692	2013-09-01 06:00:00	2013-09-01 13:30:02	2013-09-01 23:00:00	2.19987	11.1	7	2013-09-01 06:00:00	2013-09-01 23:45:00	2013-09-05 10:00:00	24.55	51.7	31.225	2.66236e+06
693	2013-10-10 13:00:00	2013-10-10 14:31:49	2013-10-11 03:00:00	0.8	5.9	1.2	2013-10-10 18:00:00	2013-10-11 01:45:00	2013-10-11 20:00:00	18.65	21	18.4	103641
694	2013-10-28 14:00:00	2013-10-28 20:30:01	2013-10-29 01:00:00	1.99985	9.8	0	2013-10-28 17:00:00	2013-10-29 00:15:00	2013-10-30 16:00:00	15.3	20.7	16.175	378644
695	2013-11-03 12:30:00	2013-11-03 13:29:57	2013-11-03 16:00:00	0.699666	1.3	11.8	2013-11-03 12:45:00	2013-11-03 12:45:00	2013-11-03 22:00:00	16.3	16.8	15.925	6403.38
696	2013-11-20 08:00:00	2013-11-20 17:29:58	2013-11-20 20:00:00	0.499889	1.9	0	2013-11-20 08:00:00	2013-11-21 08:00:00	2013-11-21 10:00:00	14.05	16.3	15.55	10025.5
697	2013-12-19 13:00:00	2013-12-19 15:28:50	2013-12-19 18:00:00	0.2	1	1.4	2013-12-19 13:00:00	2013-12-19 14:15:00	2013-12-19 22:00:00	16.55	17.3	14.8	15600
698	2013-12-21 05:20:00	2013-12-21 12:50:26	2013-12-21 21:00:00	0.3	3.3	2.4	2013-12-21 09:00:00	2013-12-22 17:30:00	2013-12-22 19:00:00	13.1	15.8	14.425	42832.1
699	2014-02-04 05:12:00	2014-02-04 05:42:00	2014-02-04 18:00:00	0.48	2.5	16.2	2014-02-04 10:00:00	2014-02-04 12:00:00	2014-02-07 03:00:00	12.9	13.8	12.75	28705.4
700	2014-02-09 06:00:00	2014-02-09 07:19:53	2014-02-09 18:00:00	0.3	2.1	3.7	2014-02-09 06:00:00	2014-02-09 18:15:00	2014-02-10 05:00:00	14.55	177	25.925	2.94817e+06
701	2014-02-10 00:10:00	2014-02-10 06:29:59	2014-02-10 09:00:00	0.999981	3.1	5.8	2014-02-10 00:25:00	2014-02-10 00:30:00	2014-02-10 11:00:00	48	49	25.425	6570
702	2014-02-27 11:04:17	2014-02-27 13:30:00	2014-02-27 18:00:00	1.59974	4.6	0	2014-02-27 12:00:00	2014-02-27 17:15:00	2014-02-27 22:00:00	14.8	18.4	16.55	42868.1
703	2014-02-28 19:00:00	2014-02-28 21:29:56	2014-03-01 04:00:00	0.999696	4.1	4.7	2014-02-28 19:00:00	2014-03-01 07:00:00	2014-03-01 11:00:00	16.175	21.9	17.725	66829.9
704	2014-03-04 11:00:00	2014-03-04 14:58:49	2014-03-04 18:00:00	0.2	1	10.7	2014-03-04 11:00:00	2014-03-04 15:00:00	2014-03-04 20:00:00	15.925	17.9	16.175	17983.8
705	2014-03-06 21:00:00	2014-03-06 23:30:02	2014-03-07 12:00:00	0.99967	5.5	3	2014-03-06 22:00:00	2014-03-07 04:30:00	2014-03-07 15:00:00	15.925	23.8	17.75	134966
706	2014-06-17 16:00:00	2014-06-17 18:29:56	2014-06-17 19:00:00	0.119838	0.3	0	2014-06-17 18:00:00	2014-06-18 07:30:00	2014-06-18 18:00:00	40.725	50.8	45.525	376481
707	2014-07-05 12:08:34	2014-07-05 13:29:58	2014-07-05 16:00:00	5.29765	8.5	0.1	2014-07-05 17:00:00	2014-07-06 00:15:00	2014-07-06 20:00:00	21.925	25.8	21	190198
708	2014-07-06 13:10:00	2014-07-06 13:40:00	2014-07-06 15:00:00	0.533333	0.8	8.6	2014-07-06 13:25:00	2014-07-06 13:45:00	2014-07-06 20:00:00	23.8	23.8	21	1838.08
709	2014-07-26 12:20:00	2014-07-26 15:30:01	2014-07-26 17:00:00	6.99814	9.1	0.2	2014-07-26 14:00:00	2014-07-26 14:30:00	2014-07-26 19:00:00	18.35	21.3	13.3	3921.75
710	2014-07-27 15:00:00	2014-07-27 16:49:57	2014-07-27 18:00:00	0.233317	0.5	9.3	2014-07-27 23:00:00	2014-07-28 18:00:00	2014-08-01 23:00:00	13.8	19.6	15.175	5.52346e+06
711	2014-07-28 00:30:00	2014-07-28 17:29:58	2014-07-28 22:00:00	1.59948	6.3	9.8	2014-07-28 01:00:00	2014-07-29 17:50:00	2014-07-30 12:00:00	14.675	822	21.95	3.99983e+06
712	2014-08-20 13:01:05	2014-08-20 13:31:05	2014-08-20 18:00:00	5.46701	13	23.8	2014-08-20 19:00:00	2014-08-21 00:15:00	2014-08-21 19:00:00	14.55	28.5	15.05	439606
713	2014-08-22 21:20:00	2014-08-23 03:30:04	2014-08-23 13:00:00	14.4857	38.6	36.8	2014-08-22 22:00:00	2014-08-23 08:00:00	2014-08-23 19:00:00	14.8	73	29.2	1355670
714	2014-09-05 13:30:00	2014-09-05 17:30:01	2014-09-05 19:00:00	0.799808	2.4	0	2014-09-05 14:00:00	2014-09-06 04:15:00	2014-09-06 17:00:00	15.925	17.3	15.55	63596.9
715	2014-09-08 23:01:27	2014-09-08 23:31:27	2014-09-09 20:00:00	4.00483	14.3	2.6	2014-09-09	2014-09-09 18:45:00	2014-09-09 23:00:00	17.9	94.2	31.75	350229
716	2014-11-01 14:00:00	2014-11-02 17:30:02	2014-11-02 23:00:00	0.909068	6.1	0	2014-11-01 16:00:00	2014-11-02 01:00:00	2014-11-03	17.3	19	18.025	85203.9
717	2014-11-14 13:30:00	2014-11-14 14:30:03	2014-11-14 16:00:00	0.999198	1.3	3.2	2014-11-14 13:45:00	2014-11-14 14:30:00	2014-11-14 20:00:00	12.4	12.4	11.5	4870.8
718	2014-12-12 21:20:00	2014-12-12 23:29:59	2014-12-13 05:00:00	1.1	3.3	0	2014-12-12 22:00:00	2014-12-13 05:00:00	2014-12-13 07:00:00	15.55	17.3	15.925	14803.1
719	2014-12-21 05:30:00	2014-12-22 13:29:58	2014-12-22 17:00:00	1.8995	7.5	0	2014-12-21 10:00:00	2014-12-22 17:15:00	2014-12-23 02:00:00	12.65	16.3	13.3	94468.5
720	2014-12-30 04:00:00	2014-12-30 05:30:07	2014-12-30 19:00:00	0.2	1.9	10.4	2014-12-30 10:00:00	2014-12-30 14:00:00	2015-01-03	9.86	11.1	7.97	156678
721	2015-05-04 12:30:00	2015-05-04 14:29:58	2015-05-05 03:00:00	1.89942	5.2	0	2015-05-04 13:00:00	2015-05-05 08:00:00	2015-05-05 12:00:00	59.325	71.9	66.85	95109.5
722	2015-05-10 09:30:00	2015-05-10 10:00:00	2015-05-10 12:00:00	0.2	0.5	25.4	2015-05-10 11:00:00	2015-05-11 00:15:00	2015-05-11 05:00:00	60.9	65.2	61.425	46386.6
723	2015-05-23 05:30:00	2015-05-23 11:30:03	2015-05-23 23:00:00	1.4	7.7	8	2015-05-23 09:00:00	2015-05-23 15:45:00	2015-05-24 06:00:00	61.7	68.5	58.825	193641
724	2015-05-24 12:10:00	2015-05-24 12:40:00	2015-05-24 19:00:00	0.516667	1.1	15.7	2015-05-24 13:00:00	2015-05-24 16:15:00	2015-05-24 21:00:00	60.875	63	56.775	24539.1
725	2015-05-25 23:08:34	2015-05-26 00:30:04	2015-05-27 03:00:00	3.69648	23.1	14.9	2015-05-26 02:00:00	2015-05-27 22:30:00	2015-05-29 19:00:00	59.05	129	108.25	6.23087e+06
726	2015-05-27 18:00:00	2015-05-27 22:29:58	2015-05-27 23:00:00	0.59986	1.4	38	2015-05-27 20:00:00	2015-05-28 13:00:00	2015-05-28 15:00:00	117	132	117	241650
727	2015-06-10 10:30:00	2015-06-10 15:30:02	2015-06-11 02:00:00	0.999804	5.1	12.4	2015-06-10 14:00:00	2015-06-10 22:50:00	2015-06-11 08:00:00	66.9	995	139.5	5.47624e+06
728	2015-08-10 13:06:00	2015-08-10 13:36:00	2015-08-10 18:00:00	0.98	2.1	3	2015-08-10 14:00:00	2015-08-11 18:00:00	2015-08-14 23:00:00	14.3	16.3	13.45	712557
729	2015-11-10 06:00:00	2015-11-10 17:30:01	2015-11-11 04:00:00	1.19997	11.2	0.6	2015-11-10 08:00:00	2015-11-10 22:00:00	2015-11-11 07:00:00	14.425	17.3	14.425	97031.2
730	2015-11-15 17:00:00	2015-11-16 00:30:02	2015-11-16 02:00:00	1.39968	5.4	11.2	2015-11-15 17:15:00	2015-11-15 17:45:00	2015-11-16 08:00:00	21.3	20.7	16.55	6496.4
731	2015-11-25 06:00:00	2015-11-26 01:57:43	2015-11-26 14:00:00	0.1	3.2	0	2015-11-25 07:00:00	2015-11-26 17:00:00	2015-11-26 20:00:00	16.3	20.7	16.675	24207.3
732	2015-12-10 23:20:00	2015-12-11 03:29:56	2015-12-11 15:00:00	3.89807	16.4	0	2015-12-11 02:00:00	2015-12-11 07:45:00	2015-12-11 17:00:00	15.675	17.3	15.8	31164.4
733	2015-12-11 20:00:00	2015-12-11 20:30:00	2015-12-11 22:00:00	0.1	0.3	16.4	2015-12-12 01:00:00	2015-12-12 09:00:00	2015-12-12 11:00:00	15.05	16.8	15.55	13432.5
734	2015-12-13 09:30:00	2015-12-13 10:29:57	2015-12-13 11:00:00	0.499799	0.7	16.7	2015-12-13 10:00:00	2015-12-13 17:45:00	2015-12-14 11:00:00	4.5025	20.7	16.425	480855
735	2015-12-22 03:10:00	2015-12-22 11:30:02	2015-12-23 18:00:00	5.09736	15.7	0	2015-12-22 06:00:00	2015-12-22 19:00:00	2015-12-24 06:00:00	18.025	20.7	2.32	875114
736	2016-01-07 06:00:00	2016-01-07 06:30:00	2016-01-07 10:00:00	0.1	0.5	0.1	2016-01-07 08:00:00	2016-01-07 17:15:00	2016-01-07 19:00:00	15.05	16.8	15.675	7736.93
737	2016-01-08 08:00:00	2016-01-08 10:30:02	2016-01-08 16:00:00	0.199934	0.9	0.6	2016-01-08 09:00:00	2016-01-09 12:45:00	2016-01-09 16:00:00	15.175	20.7	14.425	105508
738	2016-01-19 11:00:00	2016-01-19 11:30:00	2016-01-19 14:00:00	0.5	0.7	1.2	2016-01-19 13:00:00	2016-01-19 13:45:00	2016-01-19 15:00:00	14.8	15.3	14.55	787.5
739	2016-01-19 21:00:00	2016-01-19 23:30:02	2016-01-20 02:00:00	0.199934	0.6	1.9	2016-01-19 22:00:00	2016-01-20 01:00:00	2016-01-20 03:00:00	14.675	15.3	14.8	2148.75
740	2016-01-23 18:30:00	2016-01-24 02:29:59	2016-01-24 17:00:00	1.69997	9.6	1.3	2016-01-23 20:00:00	2016-01-24 09:15:00	2016-01-24 22:00:00	14.675	15.8	14.3	40420
741	2016-05-15 19:00:00	2016-05-16 02:32:50	2016-05-16 16:00:00	2.11896	8.7	0.2	2016-05-15 20:00:00	2016-05-16 13:15:00	2016-05-16 18:00:00	203	244	203.25	635277
742	2016-05-17 14:00:00	2016-05-17 15:30:01	2016-05-17 18:00:00	0.499868	0.9	9	2016-05-17 14:00:00	2016-05-17 16:15:00	2016-05-17 19:00:00	177.5	197	166.25	112219
743	2016-06-28 15:30:00	2016-06-28 16:29:57	2016-06-28 18:00:00	0.599732	1	0	2016-06-28 21:00:00	2016-06-28 22:45:00	2016-06-29	46.45	52.6	49.725	9090
744	2016-06-29 14:30:00	2016-06-29 15:29:57	2016-06-29 16:00:00	0.299933	0.5	1	2016-06-29 17:00:00	2016-06-30 00:30:00	2016-06-30 02:00:00	45	48.4	45.75	27082.5
745	2016-07-01 12:00:00	2016-07-01 12:30:00	2016-07-01 14:00:00	0.2	0.4	2.8	2016-07-01 13:00:00	2016-07-02 09:15:00	2016-07-02 12:00:00	67.7	71.9	66.65	72719.5
746	2016-07-02 10:00:00	2016-07-02 22:30:02	2016-07-03	0.499876	2.3	3.4	2016-07-02 13:00:00	2016-07-02 17:15:00	2016-07-03 02:00:00	67.975	104	67.75	125727
747	2016-08-01 12:06:39	2016-08-01 12:36:39	2016-08-01 16:00:00	0.908867	1.6	2.9	2016-08-01 16:00:00	2016-08-01 16:15:00	2016-08-01 20:00:00	21.775	24.8	16.825	7391.25
748	2016-08-03 06:20:00	2016-08-03 18:33:48	2016-08-03 21:00:00	1.56835	5.7	5.5	2016-08-03 08:00:00	2016-08-03 18:00:00	2016-08-03 22:00:00	21.35	38.1	22.5	53550
749	2016-08-22 17:00:00	2016-08-22 18:30:01	2016-08-22 22:00:00	3.9987	4.7	0.1	2016-08-22 20:00:00	2016-08-23 03:30:00	2016-08-23 20:00:00	13.075	20.9	12.5	280858
750	2016-10-24 11:00:00	2016-10-24 15:29:58	2016-10-24 19:00:00	2.19934	6.1	0	2016-10-24 11:00:00	2016-10-25 04:30:00	2016-10-25 23:00:00	14.325	24.1	16.4	427201
751	2016-11-16 23:30:00	2016-11-17 02:29:59	2016-11-17 05:00:00	1.39999	3.6	0	2016-11-17 01:00:00	2016-11-17 09:30:00	2016-11-17 12:00:00	12.05	15.7	13.95	34148.9
752	2016-11-21 18:00:00	2016-11-21 19:30:01	2016-11-22 03:00:00	2.49961	7	9.1	2016-11-21 18:00:00	2016-11-21 23:30:00	2016-11-22 04:00:00	16.95	22.2	19.55	52650
753	2016-11-23 18:00:00	2016-11-23 19:30:01	2016-11-23 23:00:00	0.499967	1.7	12.5	2016-11-23 20:00:00	2016-11-24 18:15:00	2016-11-24 23:00:00	12.275	19.1	11.275	224772
754	2016-11-26 21:00:00	2016-11-26 23:26:43	2016-11-27 23:00:00	0.6	5	14.1	2016-11-26 21:15:00	2016-11-26 21:15:00	2016-11-28 04:00:00	20.3	20.9	14.325	1083.11
755	2016-11-28 06:00:00	2016-11-28 13:30:02	2016-11-29 05:00:00	0.999807	6.7	6.7	2016-11-28 08:00:00	2016-11-28 14:45:00	2016-11-29 08:00:00	14.325	16.3	12.975	78415.3
756	2016-12-15 21:00:00	2016-12-16 17:30:05	2016-12-17 03:00:00	5.79568	22.7	0.2	2016-12-15 23:00:00	2016-12-16 18:45:00	2016-12-17 09:00:00	14.45	35.5	12.05	1.04131e+06
757	2017-01-04 23:00:00	2017-01-05 15:30:00	2017-01-05 21:00:00	0.999864	8.9	0.6	2017-01-04 23:00:00	2017-01-05 04:30:00	2017-01-06 09:00:00	15.95	17.3	1.52	481213
758	2017-01-08 07:00:00	2017-01-08 08:30:01	2017-01-08 11:00:00	0.199967	0.6	9.5	2017-01-08 07:00:00	2017-01-08 13:15:00	2017-01-08 15:00:00	16.675	121	27.125	119336
759	2017-01-12 23:00:00	2017-01-12 23:30:00	2017-01-13 05:00:00	0.2	0.6	11.5	2017-01-12 23:15:00	2017-01-12 23:45:00	2017-01-13 06:00:00	19.3	19.3	18.7	3800
760	2017-02-10 14:00:00	2017-02-11 11:51:03	2017-02-11 15:00:00	1.4	6.5	0	2017-02-10 14:00:00	2017-02-11 10:30:00	2017-02-11 22:00:00	35.6	49.8	41	567498
761	2017-04-18 17:30:00	2017-04-18 21:29:55	2017-04-19 02:00:00	3.69976	13.9	0	2017-04-18 18:00:00	2017-04-19 01:15:00	2017-04-19 03:00:00	109.25	163	143.5	208250
762	2017-05-08 00:30:00	2017-05-08 01:29:57	2017-05-08 03:00:00	0.299933	0.6	0	2017-05-08 01:00:00	2017-05-08 09:00:00	2017-05-08 11:00:00	168.25	178	166.5	113794
763	2017-07-16 12:15:00	2017-07-16 13:29:59	2017-07-16 14:00:00	0.599966	1	8.8	2017-07-16 14:00:00	2017-07-16 19:45:00	2017-07-17 16:00:00	20.95	23.4	20.5	115781
764	2017-07-17 15:30:00	2017-07-17 16:30:03	2017-07-17 21:00:00	1.3997	4.1	8.6	2017-07-17 19:00:00	2017-07-18 04:15:00	2017-07-18 20:00:00	19.45	27.6	18.95	290016
765	2017-07-19 06:00:00	2017-07-19 16:29:59	2017-07-19 21:00:00	2.7	14.4	5.6	2017-07-19 06:00:00	2017-07-19 17:00:00	2017-07-20 02:00:00	20.3	281	29.5	1.1535e+06
766	2017-07-20 23:00:00	2017-07-21 01:30:02	2017-07-21 04:00:00	0.299934	1.2	19.8	2017-07-20 23:00:00	2017-07-21 09:15:00	2017-07-21 21:00:00	22.8	27.7	21.05	185069
767	2017-07-22 18:20:00	2017-07-22 19:29:58	2017-07-22 20:00:00	0.799832	1.1	20.2	2017-07-23 01:00:00	2017-07-23 09:15:00	2017-07-23 19:00:00	20	22.8	20	84960
768	2017-07-24 12:15:00	2017-07-24 12:45:00	2017-07-24 16:00:00	0.375	0.8	17.7	2017-07-24 13:00:00	2017-07-25 14:30:00	2017-07-26 19:00:00	22.35	28.4	21.7	494484
769	2017-08-04 12:30:00	2017-08-04 15:50:20	2017-08-05 04:00:00	0.8	6.9	2.9	2017-08-04 18:00:00	2017-08-06 04:00:00	2017-08-09 22:00:00	17.5	22.8	18.8	2.45434e+06
770	2017-08-06 10:00:00	2017-08-06 14:29:58	2017-08-07 05:00:00	7.59747	21.1	7.3	2017-08-06 16:00:00	2017-08-06 21:30:00	2017-08-07 19:00:00	19.4	80	21.675	1.32544e+06
771	2017-08-12 11:05:27	2017-08-12 14:29:59	2017-08-12 16:00:00	9.49052	16	3.9	2017-08-12 15:00:00	2017-08-12 17:30:00	2017-08-12 19:00:00	20.45	71.9	31.375	116724
772	2017-09-12 12:00:00	2017-09-12 15:30:03	2017-09-12 18:00:00	0.399901	1.4	2.2	2017-09-12 14:00:00	2017-09-13 17:30:00	2017-09-13 20:00:00	13.075	17.6	13.8	101131
773	2017-09-13 12:15:00	2017-09-13 12:45:00	2017-09-13 15:00:00	0.31875	0.7	2.7	2017-09-13 15:00:00	2017-09-14 14:45:00	2017-09-15 07:00:00	14.4	41.6	20.6	797194
774	2017-09-14 00:30:00	2017-09-14 11:29:57	2017-09-15	3.19972	18.8	3.4	2017-09-14 03:00:00	2017-09-15 13:15:00	2017-09-16 22:00:00	13.175	47.9	19.5	2.34296e+06
775	2017-09-21 18:30:00	2017-09-22 00:29:57	2017-09-22 10:00:00	1.5995	10.7	0	2017-09-21 23:00:00	2017-09-22 09:15:00	2017-09-22 23:00:00	14.425	24.8	16.65	398645
776	2017-11-04 06:30:00	2017-11-04 07:00:00	2017-11-04 10:00:00	0.15	0.4	0	2017-11-04 07:00:00	2017-11-05 06:45:00	2017-11-05 13:00:00	13.55	14.8	14.05	16298
777	2017-11-17 05:30:00	2017-11-17 15:30:02	2017-11-17 20:00:00	0.999873	5.2	0	2017-11-17 09:00:00	2017-11-17 20:15:00	2017-11-18 03:00:00	12.825	15.7	14.7	42028.1
778	2017-11-27 16:08:34	2017-11-27 16:38:34	2017-11-27 18:00:00	0.657111	1.1	0	2017-11-27 17:00:00	2017-11-28 09:45:00	2017-11-28 14:00:00	13.2	14.2	13.575	7810.71
779	2017-12-20 18:20:00	2017-12-20 19:30:04	2017-12-21 05:00:00	0.99933	2.5	0	2017-12-20 18:35:00	2017-12-20 18:45:00	2017-12-22 03:00:00	12.65	12.6375	5.60687	198604
780	2018-01-06 15:30:00	2018-01-06 17:05:01	2018-01-06 19:00:00	1.4	3.1	0	2018-01-06 15:45:00	2018-01-06 17:30:00	2018-01-06 21:00:00	12.7	12.8	12.6094	1368.28
781	2018-01-09 08:20:00	2018-01-09 11:30:01	2018-01-09 16:00:00	0.799806	1.9	3.1	2018-01-09 09:00:00	2018-01-10 11:30:00	2018-01-13 15:00:00	12.1781	14.2	9.17812	742824
782	2018-02-10 12:15:00	2018-02-10 20:11:53	2018-02-10 22:00:00	0.5	1.8	0	2018-02-10 13:00:00	2018-02-11 19:45:00	2018-02-11 21:00:00	12.7	20.8	15.825	27755.5
783	2018-02-14 23:12:00	2018-02-15 02:30:02	2018-02-15 08:00:00	1.09938	2.6	2	2018-02-14 23:27:00	2018-02-14 23:45:00	2018-02-15 10:00:00	13.7	13.7	12.95	2796.43
784	2018-03-04 06:00:00	2018-03-04 10:37:29	2018-03-04 14:00:00	0.705554	1.4	2.2	2018-03-04 06:15:00	2018-03-04 06:15:00	2018-03-05 04:00:00	9.05875	9.0425	5.40375	6951.28
785	2018-03-14 13:15:00	2018-03-14 17:38:33	2018-03-15	0.657109	2.6	0.1	2018-03-14 18:00:00	2018-03-15 02:15:00	2018-03-15 12:00:00	15.8	42.2	22.35	575825
786	2018-03-17 20:00:00	2018-03-17 22:29:56	2018-03-18 13:00:00	0.499899	3.2	4.9	2018-03-17 20:00:00	2018-03-18 06:30:00	2018-03-18 15:00:00	14.525	16.4	13.4	57765.8
787	2018-04-07 15:00:00	2018-04-07 16:30:01	2018-04-07 23:00:00	2.49941	3.9	5.1	2018-04-07 18:00:00	2018-04-08	2018-04-08 07:00:00	35.325	86.1	62.4	579687
788	2018-05-19 15:05:00	2018-05-19 15:35:00	2018-05-19 17:00:00	1.15	1.8	0.3	2018-05-19 17:00:00	2018-05-20 14:30:00	2018-05-20 17:00:00	42.7	47.4	43.575	66331.6
789	2018-07-07 15:12:00	2018-07-07 16:29:59	2018-07-07 20:00:00	0.999965	2.7	0	2018-07-07 19:00:00	2018-07-08 08:45:00	2018-07-08 15:00:00	20.85	24.3	21.7	62650.7
790	2018-07-08 13:20:00	2018-07-08 15:29:59	2018-07-08 16:00:00	0.599997	1.1	2.7	2018-07-08 16:00:00	2018-07-09 04:15:00	2018-07-09 16:00:00	21.85	24.3	21.55	84164.1
791	2018-07-09 13:05:00	2018-07-09 14:30:00	2018-07-09 16:00:00	1.49979	2.9	3.8	2018-07-09 17:00:00	2018-07-09 18:15:00	2018-07-10 04:00:00	22.7	30.9	23.85	103231
792	2018-07-10 23:20:00	2018-07-10 23:50:00	2018-07-11 14:00:00	0.233333	1.1	11	2018-07-11	2018-07-11 18:00:00	2018-07-12 05:00:00	21.25	94.8	28.075	869100
793	2018-07-12 13:00:00	2018-07-12 16:00:05	2018-07-12 17:00:00	0.2	0.5	12.1	2018-07-12 15:00:00	2018-07-12 18:00:00	2018-07-13	25.4	49.8	28.625	175986
794	2018-07-13 10:30:00	2018-07-13 14:30:01	2018-07-13 17:00:00	0.999712	2	12.6	2018-07-13 11:00:00	2018-07-13 18:30:00	2018-07-13 22:00:00	27.2	32.5	28.3	33165
795	2018-07-14 09:30:00	2018-07-14 14:30:02	2018-07-14 17:00:00	0.999869	3.1	11.9	2018-07-14 09:45:00	2018-07-14 10:00:00	2018-07-14 20:00:00	27.9	27.2	22.575	6047.84
796	2018-07-17 12:04:36	2018-07-17 14:31:19	2018-07-17 17:00:00	4.24027	7.7	5.7	2018-07-17 17:00:00	2018-07-17 19:00:00	2018-07-18	15.3	109	16.125	322639
797	2018-07-19 13:30:00	2018-07-19 14:30:03	2018-07-19 18:00:00	0.999798	2.1	10.9	2018-07-19 16:00:00	2018-07-20 01:00:00	2018-07-20 22:00:00	13.2	20.6	11.3	337447
798	2018-08-21 11:12:00	2018-08-21 15:29:57	2018-08-21 20:00:00	4.39716	12.1	6.1	2018-08-21 12:00:00	2018-08-22 09:45:00	2018-08-22 22:00:00	6.73	13.7	7.92	326769
799	2018-10-03 03:20:00	2018-10-03 10:31:42	2018-10-03 19:00:00	3.42259	7.3	2.7	2018-10-03 07:00:00	2018-10-03 20:00:00	2018-10-06 04:00:00	7.98	27.6	12.7	963789
800	2018-10-04 00:20:00	2018-10-04 03:30:01	2018-10-04 08:00:00	2.99968	11.4	10	2018-10-04 01:00:00	2018-10-04 15:00:00	2018-10-05 02:00:00	14.45	21.7	14.775	247097
801	2018-10-05 02:12:00	2018-10-05 04:30:00	2018-10-05 09:00:00	1.09979	2.8	21.4	2018-10-05 02:27:00	2018-10-05 03:45:00	2018-10-05 12:00:00	14.4	15	14.125	2837.37
802	2018-10-09 21:30:00	2018-10-09 22:29:57	2018-10-10 05:00:00	3.29794	6.4	49.5	2018-10-09 23:00:00	2018-10-10 02:45:00	2018-10-10 17:00:00	16.45	38.7	19.5	299373
803	2018-10-22 02:10:00	2018-10-22 05:30:02	2018-10-22 15:00:00	4.40109	8.3	0.5	2018-10-22 03:00:00	2018-10-22 22:45:00	2018-10-24 21:00:00	15.175	21.6	16.425	622188
804	2018-11-24 08:00:00	2018-11-24 14:30:01	2018-11-24 23:00:00	0.299928	2	2.7	2018-11-24 08:00:00	2018-11-25 19:45:00	2018-11-26 09:00:00	12.95	14.6	2.84	285186
805	2018-12-02 12:00:00	2018-12-02 12:30:00	2018-12-02 15:00:00	4.6	6.1	19.2	2018-12-02 14:00:00	2018-12-03 15:00:00	2018-12-04 05:00:00	11.4	18.2	2.365	230628
806	2019-01-15 09:20:00	2019-01-15 09:50:00	2019-01-15 19:00:00	0.266667	1.3	0	2019-01-15 10:00:00	2019-01-15 16:00:00	2019-01-15 20:00:00	12.7	14.6	12.825	13162.5
807	2019-01-16 02:00:00	2019-01-16 07:59:57	2019-01-16 11:00:00	0.149946	0.6	1.3	2019-01-16 02:15:00	2019-01-16 02:30:00	2019-01-16 12:00:00	12.2	12.7	12.1	7935
808	2019-01-17 19:15:00	2019-01-17 22:30:01	2019-01-18 11:00:00	3.79881	10.4	4.8	2019-01-17 20:00:00	2019-01-18 03:15:00	2019-01-18 18:00:00	14.475	18.4	12.5	113183
809	2019-01-21 06:15:00	2019-01-21 09:30:01	2019-01-21 22:00:00	2.49927	13.4	15.2	2019-01-21 07:00:00	2019-01-21 13:00:00	2019-01-22 01:00:00	12.6	14.5	9.17	79214.1
810	2019-02-02 23:00:00	2019-02-03 03:29:58	2019-02-03 05:00:00	1.09971	2.9	0	2019-02-03	2019-02-03 06:15:00	2019-02-03 12:00:00	21.45	53.8	22.6	298063
811	2019-02-10 19:20:00	2019-02-10 21:30:05	2019-02-11 01:00:00	0.999165	2.9	19.7	2019-02-10 21:00:00	2019-02-10 22:00:00	2019-02-11 09:00:00	13.725	15.7	5.795	20965.9
812	2019-02-14 11:15:00	2019-02-14 14:30:01	2019-02-15 05:00:00	0.799951	5.9	3.9	2019-02-14 12:00:00	2019-02-15 15:30:00	2019-02-16 01:00:00	15.575	28.4	18.65	646731
813	2019-02-21 10:00:00	2019-02-21 13:30:03	2019-02-21 23:00:00	0.224975	1.2	7.2	2019-02-21 11:00:00	2019-02-22 13:30:00	2019-02-22 15:00:00	13.325	17.4	14.2	118851
814	2019-02-28 18:12:00	2019-02-28 21:30:02	2019-03-01 01:00:00	0.799646	2.3	0	2019-02-28 20:00:00	2019-03-01 18:30:00	2019-03-02 05:00:00	28.75	39.9	25.675	320753
815	2019-03-02 10:30:00	2019-03-03 10:30:00	2019-03-03 22:00:00	1.9999	18.7	2.3	2019-03-02 13:00:00	2019-03-03 21:15:00	2019-03-04 04:00:00	24.125	34.7	27.5	356871
816	2019-04-16 11:00:00	2019-04-16 13:30:26	2019-04-16 19:00:00	0.6	3.1	0.1	2019-04-16 17:00:00	2019-04-16 21:45:00	2019-04-17 09:00:00	184.25	226	176	1.12384e+06
817	2019-04-26 14:30:00	2019-04-26 17:29:59	2019-04-26 23:00:00	0.299998	1.4	1.7	2019-04-26 15:00:00	2019-04-27 20:15:00	2019-04-28 03:00:00	356	494	447.5	4.90952e+06
818	2019-05-09 09:08:34	2019-05-09 09:38:34	2019-05-09 11:00:00	0.614278	0.8	10.2	2019-05-09 09:23:34	2019-05-09 09:30:00	2019-05-09 14:00:00	250	245	212.5	64650
819	2019-06-17 12:00:00	2019-06-17 13:29:55	2019-06-17 14:00:00	0.224698	0.4	0.5	2019-06-17 13:00:00	2019-06-17 13:15:00	2019-06-17 15:00:00	280.75	295	273.25	22725
820	2019-06-20 22:00:00	2019-06-20 22:30:00	2019-06-21 05:00:00	0.6	1.7	1.1	2019-06-21	2019-06-21 10:45:00	2019-06-21 16:00:00	269.5	312	271.75	729717
821	2019-10-30	2019-10-30 00:30:00	2019-10-30 05:00:00	0.1	0.6	0	2019-10-30	2019-10-30 18:30:00	2019-10-31 10:00:00	15.8	17	4.2675	178015
822	2019-11-19 22:07:30	2019-11-20 04:29:54	2019-11-21 04:00:00	5.59817	37.6	0	2019-11-20	2019-11-21 00:15:00	2019-11-21 13:00:00	14.3	30.9	17.7	718401
823	2019-11-25 11:07:30	2019-11-25 14:03:29	2019-11-26 11:00:00	0.8	10.2	37.6	2019-11-25 12:00:00	2019-11-25 18:00:00	2019-11-26 12:00:00	14.6	17	9.78	71391.9
824	2019-11-27	2019-11-27 00:30:00	2019-11-27 05:00:00	0.1	0.6	10.2	2019-11-27	2019-11-27 18:00:00	2019-11-28 02:00:00	11.925	22.9	17.525	114706
825	2019-12-04 11:30:00	2019-12-04 18:29:58	2019-12-05 11:00:00	0.799928	8.7	0	2019-12-04 12:00:00	2019-12-05 06:15:00	2019-12-05 12:00:00	15.8	23.7	19.1	150390
826	2019-12-08 05:06:39	2019-12-08 14:29:54	2019-12-08 17:00:00	1.59889	12.5	8.7	2019-12-08 07:00:00	2019-12-08 17:00:00	2019-12-09 02:00:00	18.4	22.1	18.4	74160
827	2019-12-27 05:12:00	2019-12-27 06:42:13	2019-12-27 17:00:00	0.5	3.6	7.9	2019-12-27 12:00:00	2019-12-27 17:45:00	2019-12-27 21:00:00	14.15	18.1	16.1	32523.8
828	2019-12-28	2019-12-28 00:30:00	2019-12-28 05:00:00	0.1	0.6	11.5	2019-12-28 00:15:00	2019-12-28 01:45:00	2019-12-28 07:00:00	16.1	16.1	13.7	3420
829	2020-01-01 17:07:30	2020-01-01 20:03:29	2020-01-01 23:00:00	0.8	4.8	4.5	2020-01-01 18:00:00	2020-01-01 18:30:00	2020-01-02 02:00:00	24.7	25.1	16.4	2460.94
830	2020-01-09 08:00:00	2020-01-11 17:44:51	2020-01-12 17:00:00	0.2	12.9	0	2020-01-09 09:00:00	2020-01-11 19:15:00	2020-01-13 03:00:00	9.715	26.6	16.15	739154
831	2020-01-16 23:15:00	2020-01-16 23:45:18	2020-01-17 17:00:00	0.4	5.1	0	2020-01-16 23:30:00	2020-01-16 23:30:00	2020-01-17 23:00:00	19.8	19.8	9.1125	192622
832	2020-01-24 18:30:00	2020-01-24 19:29:57	2020-01-24 20:00:00	0.299933	0.5	6.7	2020-01-24 20:00:00	2020-01-25 17:15:00	2020-01-25 22:00:00	15	17.6	14.4	26783.7
833	2020-01-26 17:30:00	2020-01-27 01:29:59	2020-01-27 05:00:00	1.09999	6.2	7.2	2020-01-26 17:45:00	2020-01-26 17:45:00	2020-01-27 13:00:00	16.2	15.6	15	7335.58
834	2020-01-28 06:00:00	2020-01-28 14:50:29	2020-01-29 05:00:00	0.2	3	6.7	2020-01-28 11:00:00	2020-01-28 18:00:00	2020-01-29 09:00:00	10.0925	18.2	12.575	235158
835	2020-02-02 23:06:39	2020-02-03 03:52:57	2020-02-03 23:00:00	1	12.6	3	2020-02-02 23:21:39	2020-02-02 23:30:00	2020-02-04 04:00:00	16.8	16.8	9.955	78774.6
836	2020-02-05 05:30:00	2020-02-05 10:20:25	2020-02-05 11:00:00	0.2	1.2	12.6	2020-02-05 09:00:00	2020-02-05 13:30:00	2020-02-05 16:00:00	3.69	37.5	9.9475	73354.2
837	2020-02-05 23:20:00	2020-02-06 03:27:56	2020-02-06 05:00:00	0.3	1.8	13.8	2020-02-06 07:00:00	2020-02-06 18:45:00	2020-02-07 04:00:00	16.55	22.5	16.7	161346
838	2020-02-22 11:15:00	2020-02-22 20:30:08	2020-02-23 05:00:00	1.9	16.2	0	2020-02-22 12:00:00	2020-02-22 16:45:00	2020-02-23 10:00:00	12.2225	19.2	15.6	204364
839	2020-03-01 05:30:00	2020-03-02 01:52:04	2020-03-02 05:00:00	0.2	4.8	0	2020-03-01 11:00:00	2020-03-01 18:45:00	2020-03-02 08:00:00	14.75	15.8	14.6	29696.8
840	2020-03-13 05:07:30	2020-03-13 11:30:00	2020-03-13 17:00:00	1.59999	12.2	3.3	2020-03-13 05:22:30	2020-03-13 05:30:00	2020-03-13 21:00:00	23.4	23.4	20.475	6721.33
841	2020-03-17 23:12:00	2020-03-18 08:30:03	2020-03-19 11:00:00	1.19973	14.5	12.2	2020-03-18	2020-03-18 04:15:00	2020-03-19 17:00:00	18.275	23.6	18.65	427941
842	2020-03-29 06:00:00	2020-03-29 15:29:58	2020-03-29 23:00:00	0.399963	4.2	18	2020-03-29 06:15:00	2020-03-29 06:15:00	2020-03-30 07:00:00	18	18	17.2	3285.45
843	2020-04-01 23:12:00	2020-04-02 00:42:13	2020-04-02 05:00:00	0.5	3	6.6	2020-04-02	2020-04-02 02:45:00	2020-04-02 14:00:00	26.775	28.8	23.5	102198
844	2020-04-20 17:15:00	2020-04-21 09:29:59	2020-04-21 23:00:00	0.399977	8.3	19.9	2020-04-20 20:00:00	2020-04-21 05:45:00	2020-04-22 02:00:00	23.75	27.5	26.2	103087
845	2020-05-10 21:04:36	2020-05-10 21:34:36	2020-05-11 01:00:00	1.30767	1.6	0	2020-05-10 22:00:00	2020-05-12 01:00:00	2020-05-13 14:00:00	84.375	89.8	87.775	818374
846	2020-06-06 20:15:00	2020-06-06 22:29:54	2020-06-07 23:00:00	3.09708	17.7	6	2020-06-06 22:00:00	2020-06-07 03:45:00	2020-06-08 01:00:00	50.85	64.7	50.15	515831
847	2020-07-22 05:12:00	2020-07-22 16:29:59	2020-07-22 23:00:00	2.19984	12.3	0.6	2020-07-22 06:00:00	2020-07-22 22:15:00	2020-07-24 23:00:00	11.225	27.7	13.625	871056
848	2020-07-23 06:00:00	2020-07-23 11:29:59	2020-07-23 17:00:00	3.89993	8.8	12.6	2020-07-23 09:00:00	2020-07-23 10:00:00	2020-07-23 18:00:00	17.8	18.5	16.7	4242.5
849	2020-07-25 11:20:00	2020-07-25 13:29:59	2020-07-25 23:00:00	0.399999	3.1	21.6	2020-07-25 11:35:00	2020-07-25 13:00:00	2020-07-26 02:00:00	15.2	15.3	14.25	1657.5
850	2020-08-22 12:00:00	2020-08-22 15:29:57	2020-08-22 19:00:00	0.499728	1.4	0	2020-08-22 12:00:00	2020-08-22 15:45:00	2020-08-22 20:00:00	8.49	9.77	8.08	10511.7
851	2020-08-23 12:00:00	2020-08-23 16:29:58	2020-08-23 18:00:00	0.299965	0.8	1.4	2020-08-23 20:00:00	2020-08-23 20:30:00	2020-08-24 02:00:00	10.4325	11.1	8.7575	1273.12
852	2020-09-07 06:30:00	2020-09-08 09:29:58	2020-09-09 05:00:00	1.09971	13.2	0	2020-09-07 07:00:00	2020-09-09 13:00:00	2020-09-15 22:00:00	6.38	10.8	7.43	1.38646e+06
853	2020-10-25 11:04:17	2020-10-25 15:37:52	2020-10-25 23:00:00	1.4	9.6	0	2020-10-25 14:00:00	2020-10-26 02:30:00	2020-10-26 12:00:00	9.9925	11.3	10.3	40786.6
854	2020-11-08 06:00:00	2020-11-08 12:50:27	2020-11-08 23:00:00	0.3	3.6	12.7	2020-11-08 07:00:00	2020-11-08 07:30:00	2020-11-09 03:00:00	12.325	12.9	12.3	1056.38
855	2020-11-09 05:06:39	2020-11-09 09:30:00	2020-11-09 17:00:00	1.4	9.4	16.3	2020-11-09 05:21:39	2020-11-09 05:30:00	2020-11-09 20:00:00	12.3	12.3	11.8	10869.8
856	2020-11-13 06:30:00	2020-11-13 08:58:50	2020-11-13 11:00:00	0.2	1	13	2020-11-13 10:00:00	2020-11-13 17:30:00	2020-11-14 04:00:00	6.3	15.8	13.4	193712
857	2020-11-13 23:30:00	2020-11-14 07:00:02	2020-11-14 11:00:00	0.4	3.2	14	2020-11-13 23:45:00	2020-11-13 23:45:00	2020-11-14 13:00:00	14.6	14.6	12.45	1833.54
858	2020-12-13 11:06:39	2020-12-13 15:52:57	2020-12-13 17:00:00	1	6	8.1	2020-12-13 12:00:00	2020-12-13 15:30:00	2020-12-13 20:00:00	7.0825	13.4	8.6	63781.7
859	2020-12-13 23:20:00	2020-12-14 09:17:01	2020-12-14 17:00:00	0.6	6.6	14.1	2020-12-14 01:00:00	2020-12-14 13:15:00	2020-12-14 21:00:00	8.915	12.9	10.8	66615.8
860	2020-12-17 05:30:00	2020-12-17 20:32:38	2020-12-18 11:00:00	1.6	16.1	20.7	2020-12-17 06:00:00	2020-12-17 11:30:00	2020-12-18 15:00:00	7.7175	18.4	12.3	291086
861	2020-12-28 05:08:34	2020-12-28 18:54:57	2020-12-29 05:00:00	0.7	13.2	0	2020-12-28 05:23:34	2020-12-28 11:00:00	2020-12-29 11:00:00	12.3	12.9	12.175	23808.8
862	2020-12-30 07:30:00	2020-12-31 03:52:04	2020-12-31 05:00:00	0.2	4.4	13.2	2020-12-30 08:00:00	2020-12-31 19:15:00	2021-01-01 05:00:00	3.6675	17	13.275	404650
863	2021-01-08 12:00:00	2021-01-08 12:30:00	2021-01-08 17:00:00	0.1	0.6	0	2021-01-08 12:00:00	2021-01-08 15:15:00	2021-01-08 18:00:00	8.435	17.7	11.55	58258.7
864	2021-01-08 23:30:00	2021-01-09 04:20:25	2021-01-09 05:00:00	0.2	1.2	0.6	2021-01-09 01:00:00	2021-01-09 07:15:00	2021-01-09 11:00:00	12.625	16.4	11.675	35578.1
865	2021-01-22 11:30:00	2021-01-22 19:00:02	2021-01-23 14:00:00	1	10.5	0	2021-01-22 13:00:00	2021-01-22 20:30:00	2021-01-23 17:00:00	11.3	11.8	11.3	16650
866	2021-01-24 13:00:00	2021-01-24 14:49:57	2021-01-24 17:00:00	0.266583	0.7	10.5	2021-01-24 13:00:00	2021-01-24 20:15:00	2021-01-25 03:00:00	10.275	16.4	8.005	124229
867	2021-01-25 10:20:00	2021-01-25 23:30:01	2021-01-26 06:00:00	1.89949	7.1	11.6	2021-01-25 14:00:00	2021-01-25 19:15:00	2021-01-26 09:00:00	11.6	17	10.55	137418
868	2021-01-26 11:00:00	2021-01-26 12:30:01	2021-01-26 16:00:00	0.199967	0.8	18.7	2021-01-26 12:00:00	2021-01-27 14:00:00	2021-01-27 16:00:00	11.825	15.8	10.095	26337.5
869	2021-01-29 12:30:00	2021-01-29 16:29:55	2021-01-30 05:00:00	2.29929	6.7	9	2021-01-29 13:00:00	2021-01-30 18:45:00	2021-01-31 01:00:00	11.425	13.4	11.175	29177.8
870	2021-02-09 12:20:00	2021-02-09 14:29:59	2021-02-10 05:00:00	0.999997	4.5	0.3	2021-02-09 13:00:00	2021-02-09 18:30:00	2021-02-10 09:00:00	11.3	11.8	10.925	16124.1
871	2021-02-12 01:07:30	2021-02-12 08:29:55	2021-02-12 13:00:00	1.29937	6.6	5.6	2021-02-12 06:00:00	2021-02-12 17:45:00	2021-02-12 20:00:00	11.325	12.8	12.2	14447.8
872	2021-02-13 06:00:00	2021-02-13 11:30:05	2021-02-14 16:00:00	3.69847	52.2	12.1	2021-02-13 08:00:00	2021-02-13 16:45:00	2021-02-14 20:00:00	11.575	13.8	9.72	101337
873	2021-02-18 12:04:00	2021-02-18 13:03:33	2021-02-18 15:00:00	1.5	4.5	73.9	2021-02-18 14:00:00	2021-02-18 19:30:00	2021-02-19 03:00:00	8.93	17.9	5.81	161006
874	2021-03-03 17:20:00	2021-03-04 03:36:04	2021-03-04 05:00:00	0.5	4.6	4.8	2021-03-03 18:00:00	2021-03-03 20:15:00	2021-03-04 06:00:00	14.025	16.5	12.4	29694.8
875	2021-04-26 11:15:00	2021-04-26 19:30:01	2021-04-27 17:00:00	1.89991	24.5	0.1	2021-04-26 13:00:00	2021-04-26 21:00:00	2021-04-28 02:00:00	27.475	35.7	29.05	494547
876	2021-05-07 22:30:00	2021-05-07 23:00:00	2021-05-08	0.2	0.4	0	2021-05-07 23:00:00	2021-05-08 15:00:00	2021-05-08 18:00:00	63.75	70.8	67.85	133658
877	2021-07-19 06:00:00	2021-07-19 15:30:04	2021-07-19 23:00:00	0.7	6	19.5	2021-07-19 06:00:00	2021-07-19 22:15:00	2021-07-20 20:00:00	9.38	17.7	10.4	230789
878	2021-07-21 11:00:00	2021-07-21 12:32:55	2021-07-21 18:00:00	1.90987	4.3	14.8	2021-07-21 13:00:00	2021-07-22 06:30:00	2021-07-23 21:00:00	10.9	16.6	11.1	445416
879	2021-07-25 12:12:00	2021-07-25 12:42:00	2021-07-25 16:00:00	0.406667	0.6	5.3	2021-07-25 17:00:00	2021-07-25 19:15:00	2021-07-26 01:00:00	10.925	23.6	11.8	77710.8
880	2021-07-27 05:15:00	2021-07-27 15:29:58	2021-07-27 18:00:00	3.29875	19.2	6.9	2021-07-27 07:00:00	2021-07-27 22:45:00	2021-07-28 21:00:00	11.525	39.9	13.35	713265
881	2021-07-28 11:07:30	2021-07-28 14:03:29	2021-07-28 17:00:00	0.8	4.8	21.8	2021-07-28 11:22:30	2021-07-28 11:30:00	2021-07-28 21:00:00	17.3	17.3	13.35	2379.08
882	2021-07-30 11:15:00	2021-07-30 13:30:00	2021-07-30 23:00:00	0.599952	3.4	39.5	2021-07-30 15:00:00	2021-07-30 17:45:00	2021-07-31 04:00:00	20.3	58.7	22.7	263575
883	2021-07-31 12:00:00	2021-07-31 20:29:57	2021-08-01 03:00:00	1.49937	5.5	42.9	2021-07-31 16:00:00	2021-08-01 17:15:00	2021-08-02 07:00:00	21.75	66	26.2	855406
884	2021-08-17 12:00:00	2021-08-18 21:30:03	2021-08-19 17:00:00	4.29965	49.4	0.1	2021-08-17 12:00:00	2021-08-19 04:00:00	2021-08-20 05:00:00	9.02	60.3	20.225	1.53485e+06
885	2021-08-31 13:00:00	2021-09-01 08:29:58	2021-09-01 17:00:00	2.19988	19.3	0	2021-08-31 22:00:00	2021-09-01 12:30:00	2021-09-02 21:00:00	10.4	25.5	12.9	788524
886	2021-09-18 05:30:00	2021-09-18 11:30:03	2021-09-18 17:00:00	1.09971	4.9	0	2021-09-18 09:00:00	2021-09-18 21:30:00	2021-09-19 23:00:00	8.25	10.9	7.82	252797
