# Supplementary material for: Leveraging a time-series event separation method to disentangle time-varying hydrologic controls on streamflow – application to wildfire-affected catchments
Source: Copernicus journal article supplement (doi:10.5194/hess-29-27-2025), 2025-01-03
Supplement: Supplementary file 7 [file ShitikeCreek_EventAttributes.xlsx]

## Sheet: Events_Sorting - Copy
	storm_start	storm_peak	storm_end	storm_peak_60int_mm/hr	storm_depth_mm	antPrecip_mm	flow_start	flow_peak	flow_end	flow_start_mag_cfs	flow_peak_mag_cfs	flow_end_mag_cfs	volume_ft3
1	1986-10-28 04:10:00	1986-10-29 09:30:03	1986-10-31 15:00:00	4.79935	50.1	32	1986-10-29 17:00:00	1986-10-31 15:30:00	1986-11-03 13:00:00	31.125	54	36	4.59571e+06
2	1986-11-16 00:05:00	1986-11-16 03:30:02	1986-11-17 09:00:00	6.79457	36.9	20.5	1986-11-16 14:00:00	1986-11-17 06:30:00	1986-11-17 20:00:00	33.125	43	38	390541
3	1986-11-25 22:00:00	1986-11-26 14:29:54	1986-11-29 05:00:00	5.09775	92.3	0	1986-11-26 19:00:00	1986-11-27 11:00:00	1986-11-29 09:00:00	107.75	310	140	1.87796e+07
4	1987-01-29 21:00:00	1987-01-31 03:29:53	1987-02-03 04:00:00	9.19178	103.2	11.9	1987-01-30 11:00:00	1987-02-01 11:00:00	1987-02-03 05:00:00	51.375	206	129	1.18365e+07
5	1987-02-11 01:00:00	1987-02-11 04:29:57	1987-02-11 07:00:00	2.99857	6.9	0.1	1987-02-11 01:15:00	1987-02-11 01:15:00	1987-02-11 08:00:00	71	71	70	8350
6	1987-02-12 09:30:00	1987-02-12 15:30:03	1987-02-14 08:00:00	4.99974	41.2	7	1987-02-12 14:00:00	1987-02-13 09:00:00	1987-02-14 09:00:00	71	99.7	91	1.5548e+06
7	1987-03-04 20:00:00	1987-03-05 20:53:07	1987-03-06	0.7	10.1	24.2	1987-03-04 20:00:00	1987-03-05 23:45:00	1987-03-07 07:00:00	81	93	89	1.05691e+06
8	1987-03-10 10:00:00	1987-03-11 12:30:00	1987-03-15 10:00:00	4.29972	114.5	27.8	1987-03-11 16:00:00	1987-03-13 22:00:00	1987-03-15 11:00:00	72.625	111	99.7	4.45552e+06
9	1987-04-09 05:00:00	1987-04-10 14:30:03	1987-04-11 21:00:00	1.19991	15	11.5	1987-04-09 07:00:00	1987-04-11 09:00:00	1987-04-12 11:00:00	84.25	96	93	568586
10	1987-04-27 14:05:27	1987-04-29 15:30:00	1987-05-02 20:00:00	2.39974	43.2	0	1987-04-27 17:00:00	1987-04-28 23:30:00	1987-05-02 22:00:00	106.5	176	111	2.0306e+07
11	1987-05-07 17:00:00	1987-05-07 22:29:59	1987-05-09 04:00:00	0.599989	5.9	0	1987-05-07 17:00:00	1987-05-08 22:30:00	1987-05-09 06:00:00	148.875	192	178	1.64053e+06
12	1987-05-29 20:00:00	1987-05-30 03:29:56	1987-05-31 18:00:00	2.29959	25.9	0	1987-05-29 20:00:00	1987-05-31 00:30:00	1987-05-31 20:00:00	68.125	117	95.25	1.92324e+06
13	1987-06-05 04:30:00	1987-06-05 08:30:01	1987-06-05 12:00:00	0.699968	3	0	1987-06-05 08:00:00	1987-06-05 09:00:00	1987-06-05 13:00:00	103.25	105	86	33356.2
14	1987-06-14 14:00:00	1987-06-14 15:30:01	1987-06-14 19:00:00	1.4997	3.8	0	1987-06-14 15:00:00	1987-06-14 23:00:00	1987-06-15 10:00:00	64.75	101	83	941208
15	1987-06-20 07:00:00	1987-06-20 22:30:05	1987-06-21 22:00:00	0.6	5.5	3.8	1987-06-20 18:00:00	1987-06-21 06:00:00	1987-06-22 09:00:00	59.25	73	60	1.04164e+06
16	1987-07-16 13:00:00	1987-07-17 14:29:53	1987-07-18 15:00:00	4.4976	50.8	0	1987-07-17 04:00:00	1987-07-18 03:30:00	1987-07-18 17:00:00	37.125	81	61	930432
17	1987-07-19 14:00:00	1987-07-19 18:25:28	1987-07-19 21:00:00	0.4	1.7	50.8	1987-07-19 14:15:00	1987-07-19 14:15:00	1987-07-20 02:00:00	46	46	43	9545.74
18	1987-07-20 12:30:00	1987-07-20 17:30:02	1987-07-21	1.49994	7.5	52.5	1987-07-20 21:00:00	1987-07-21 05:00:00	1987-07-21 11:00:00	42.75	58	50	210427
19	1987-11-30 00:20:00	1987-11-30 23:29:54	1987-12-04 19:00:00	5.39844	122.5	0	1987-11-30 21:00:00	1987-12-03 10:30:00	1987-12-04 23:00:00	22.625	176	81	1.05266e+07
20	1987-12-05 04:30:00	1987-12-05 23:29:54	1987-12-07 11:00:00	1.29933	11.8	122.5	1987-12-06 02:00:00	1987-12-06 11:30:00	1987-12-07 14:00:00	72.625	105	75	2.19317e+06
21	1987-12-08	1987-12-09 03:29:56	1987-12-11 17:00:00	8.49852	114.1	11.8	1987-12-09 05:00:00	1987-12-09 23:30:00	1987-12-11 19:00:00	60.625	707	168	1.84958e+07
22	1988-01-07 04:06:00	1988-01-10 03:30:05	1988-01-11 21:00:00	5.2945	131.2	10.8	1988-01-09 11:00:00	1988-01-10 04:00:00	1988-01-11 23:00:00	27.25	135	69	8.23225e+06
23	1988-01-12 15:30:00	1988-01-13 17:29:57	1988-01-16	2.49962	51	131.2	1988-01-13 20:00:00	1988-01-14 22:00:00	1988-01-16 05:00:00	61.625	211	158	9.89559e+06
24	1988-03-05 12:00:00	1988-03-06 02:30:04	1988-03-06 04:00:00	2.19935	12	21	1988-03-05 14:00:00	1988-03-05 15:00:00	1988-03-06 16:00:00	88.375	91	86	314494
25	1988-04-01 22:00:00	1988-04-02 03:29:59	1988-04-04 06:00:00	2.99999	31.2	11.7	1988-04-02 17:00:00	1988-04-03 08:00:00	1988-04-04 15:00:00	90.875	147	127	4.1524e+06
26	1988-04-05 04:30:00	1988-04-06 11:29:57	1988-04-07 01:00:00	0.499921	9.3	31.2	1988-04-05 16:00:00	1988-04-06 22:00:00	1988-04-07 20:00:00	118.25	133	127	633984
27	1988-04-15 05:00:00	1988-04-15 18:29:57	1988-04-16 08:00:00	0.399856	3.2	8.2	1988-04-15 21:00:00	1988-04-17 02:00:00	1988-04-17 19:00:00	148.25	181	166	1.53989e+06
28	1988-04-18 14:00:00	1988-04-20 17:30:00	1988-04-22 08:00:00	4.79987	124.8	11.4	1988-04-19 14:00:00	1988-04-21 01:30:00	1988-04-22 10:00:00	130.25	192	147	5.33116e+06
29	1988-05-11 05:00:00	1988-05-12 18:30:01	1988-05-14 04:00:00	1.69979	16.1	0	1988-05-11 08:00:00	1988-05-13 05:00:00	1988-05-14 09:00:00	72.125	156	127	5.55103e+06
30	1988-05-26 18:00:00	1988-05-28 02:30:01	1988-05-29 22:00:00	3.39988	36.7	0	1988-05-26 23:00:00	1988-05-28 14:30:00	1988-05-29 23:00:00	110.25	208	127	7.29298e+06
31	1988-05-30 20:00:00	1988-06-02 19:30:00	1988-06-04 19:00:00	2.39999	64.1	36.7	1988-06-01	1988-06-03 09:30:00	1988-06-04 21:00:00	96.25	125	111	2.06934e+06
32	1988-06-07 14:00:00	1988-06-07 20:29:55	1988-06-08 01:00:00	1.49951	7.2	9.3	1988-06-07 14:15:00	1988-06-07 14:15:00	1988-06-08 02:00:00	89	89	86	23639.4
33	1988-06-28 13:00:00	1988-06-28 16:29:57	1988-06-29 02:00:00	0.699933	3.4	2.4	1988-06-28 13:15:00	1988-06-28 13:15:00	1988-06-29 13:00:00	93	93	78	150442
34	1988-07-11 05:00:00	1988-07-11 05:30:00	1988-07-11 17:00:00	0.1	1.1	0	1988-07-11 05:15:00	1988-07-11 05:15:00	1988-07-11 20:00:00	88	88	73	12279.7
35	1988-07-12 08:00:00	1988-07-12 13:30:05	1988-07-13 04:00:00	0.3	4.3	1.1	1988-07-12 18:00:00	1988-07-13 08:30:00	1988-07-13 17:00:00	72.375	99.7	83	827851
36	1988-09-18 21:30:00	1988-09-19 02:29:56	1988-09-19 17:00:00	4.99818	22	3.1	1988-09-19 04:00:00	1988-09-19 10:30:00	1988-09-22	28.125	35	29	790490
37	1988-11-27 08:00:00	1988-11-27 12:29:58	1988-11-28 21:00:00	1.69989	22.9	0	1988-11-27 11:00:00	1988-11-27 23:00:00	1988-11-29 11:00:00	64.125	163	94	6.75618e+06
38	1988-12-08 16:00:00	1988-12-09 03:30:01	1988-12-09 06:00:00	0.499913	2.2	11.1	1988-12-09 11:00:00	1988-12-10 02:30:00	1988-12-10 10:00:00	64.125	71	69	163549
39	1988-12-12 22:00:00	1988-12-12 23:31:49	1988-12-13 18:00:00	0.7	3.4	2.2	1988-12-12 22:00:00	1988-12-13 13:00:00	1988-12-14	69	91	84	585441
40	1989-03-03 04:04:36	1989-03-03 04:34:36	1989-03-03 17:00:00	1.3844	4.6	20.4	1989-03-03 07:00:00	1989-03-03 10:00:00	1989-03-03 18:00:00	31.875	39	31	46523.9
41	1989-03-04 08:00:00	1989-03-04 20:30:02	1989-03-07	4.79978	78.4	25	1989-03-05 07:00:00	1989-03-06 18:00:00	1989-03-07 12:00:00	31.125	86	72	2.64911e+06
42	1989-03-08 04:01:52	1989-03-17 15:30:02	1989-03-18 16:00:00	3.19926	110.3	83	1989-03-09 10:00:00	1989-03-12 19:30:00	1989-03-18 19:00:00	64.625	94	65	1.05258e+07
43	1989-03-20 14:00:00	1989-03-20 18:29:58	1989-03-21 22:00:00	1.89962	15.1	0	1989-03-20 21:00:00	1989-03-22 04:00:00	1989-03-23 22:00:00	60.125	76	72	1.56437e+06
44	1989-04-23 05:30:00	1989-04-24 21:30:01	1989-04-26 01:00:00	3.29975	67.6	41.6	1989-04-23 17:00:00	1989-04-24 18:30:00	1989-04-26 08:00:00	130.25	163	138	2.0659e+06
45	1989-05-02 16:12:00	1989-05-02 16:47:54	1989-05-02 19:00:00	0.5	1.1	15.9	1989-05-02 22:00:00	1989-05-02 22:30:00	1989-05-03 12:00:00	118.25	119	117	46755.8
46	1989-05-06 14:00:00	1989-05-06 17:30:03	1989-05-06 19:00:00	0.1	0.4	12.3	1989-05-06 14:15:00	1989-05-06 14:15:00	1989-05-06 21:00:00	203	203	197	57300
47	1989-05-09 00:20:00	1989-05-09 03:29:55	1989-05-11 04:00:00	4.89884	19.7	11.8	1989-05-09 00:35:00	1989-05-12	1989-05-12 04:00:00	129	129	123	27000
48	1989-05-28 08:00:00	1989-05-29 02:47:59	1989-05-29 15:00:00	0.5	3.8	39.2	1989-05-28 08:15:00	1989-05-28 08:15:00	1989-05-29 16:00:00	81	81	73	14470.9
49	1989-06-02 05:00:00	1989-06-03 13:30:01	1989-06-03 15:00:00	0.999675	5.2	3.8	1989-06-02 05:00:00	1989-06-04	1989-06-04 15:00:00	124.25	161	140	2.0629e+06
50	1989-06-13 04:30:00	1989-06-14 03:29:59	1989-06-15 16:00:00	0.799973	12.9	0.9	1989-06-13 18:00:00	1989-06-15 01:00:00	1989-06-15 17:00:00	113.25	173	135	3.25572e+06
51	1989-06-19 00:30:00	1989-06-19 21:30:03	1989-06-20 04:00:00	1.39981	8.3	13.3	1989-06-19 00:45:00	1989-06-19 00:45:00	1989-06-20 11:00:00	113	113	88	19602.9
52	1989-06-28 04:20:00	1989-06-29 18:30:00	1989-06-29 22:00:00	0.699927	9.5	0	1989-06-29 19:00:00	1989-06-30 06:00:00	1989-06-30 15:00:00	72.625	93	84	403069
53	1989-07-15 23:30:00	1989-07-16 03:30:01	1989-07-16 14:00:00	4.29866	8.2	1	1989-07-16 18:00:00	1989-07-17 00:30:00	1989-07-17 17:00:00	65.375	78	68.5	499638
54	1989-07-31 08:00:00	1989-07-31 16:59:18	1989-07-31 19:00:00	0.3	1.6	0	1989-07-31 08:15:00	1989-07-31 08:15:00	1989-07-31 20:00:00	49	49	47	30504.3
55	1989-08-01 15:00:00	1989-08-01 18:10:19	1989-08-02 04:00:00	0.4	3.4	1.6	1989-08-01 20:00:00	1989-08-02 09:30:00	1989-08-03 19:00:00	47.25	61	47	1.05761e+06
56	1989-11-08 15:00:00	1989-11-09 00:37:17	1989-11-09 08:00:00	0.6	7.3	26.9	1989-11-09 03:00:00	1989-11-09 22:30:00	1989-11-10 20:00:00	30.125	88	50	3.11137e+06
57	1989-11-11 19:20:00	1989-11-12 03:30:01	1989-11-12 18:00:00	5.29848	26.4	7.4	1989-11-12 05:00:00	1989-11-12 13:30:00	1989-11-13 14:00:00	39.75	173	53	4.6181e+06
58	1989-11-13 13:00:00	1989-11-13 14:31:49	1989-11-14 04:00:00	0.8	4.8	33.8	1989-11-13 13:15:00	1989-11-13 13:15:00	1989-11-14 06:00:00	56	55	46	14923.9
59	1989-11-16 13:00:00	1989-11-17 00:30:01	1989-11-17 04:00:00	2.49989	15.8	31.3	1989-11-16 23:00:00	1989-11-17 10:30:00	1989-11-18 06:00:00	37.625	53	44	652502
60	1989-12-02 20:20:00	1989-12-04 17:29:56	1989-12-05	5.29944	54.8	0	1989-12-03 02:00:00	1989-12-05 01:00:00	1989-12-06 21:00:00	30.125	352	81	1.84029e+07
61	1989-12-05 10:00:00	1989-12-05 15:29:59	1989-12-06 09:00:00	1.6	7.9	54.8	1989-12-05 10:15:00	1989-12-05 10:15:00	1989-12-06 21:00:00	158	156	81	1508.63
62	1989-12-07	1989-12-07 00:30:00	1989-12-07 02:00:00	0.2	0.4	62.7	1989-12-07 00:15:00	1989-12-07 00:15:00	1989-12-07 06:00:00	81	81	75	3208.7
63	1989-12-07 23:12:00	1989-12-08 02:29:56	1989-12-09 17:00:00	5.2992	22.3	63.1	1989-12-08 02:00:00	1989-12-08 09:00:00	1989-12-10 04:00:00	65.125	103	65	2.89495e+06
64	1990-01-03 07:20:00	1990-01-07 21:29:56	1990-01-09 03:00:00	11.0993	219.2	22	1990-01-04 09:00:00	1990-01-08 04:00:00	1990-01-09 13:00:00	27.125	688	308.625	1.98854e+07
65	1990-03-21 04:07:30	1990-03-22 14:29:57	1990-03-23 10:00:00	5.29928	37.4	4	1990-03-21 10:00:00	1990-03-23 18:30:00	1990-03-25 08:00:00	61.125	75	71	1.5416e+06
66	1990-04-06 11:30:00	1990-04-06 13:29:58	1990-04-06 20:00:00	0.299966	1	0	1990-04-06 17:00:00	1990-04-07 19:00:00	1990-04-09 02:00:00	98.2125	107	103	1.29921e+06
67	1990-04-15 15:00:00	1990-04-15 17:30:02	1990-04-15 19:00:00	0.299868	0.8	0	1990-04-15 19:00:00	1990-04-16 03:00:00	1990-04-16 17:00:00	129.5	147	142	619809
68	1990-04-16 23:00:00	1990-04-16 23:30:00	1990-04-17 02:00:00	0.1	0.4	0.8	1990-04-16 23:00:00	1990-04-17 00:30:00	1990-04-17 16:00:00	152.875	156	144	268941
69	1990-04-24 20:30:00	1990-04-25 03:29:58	1990-04-25 15:00:00	2.19971	13.2	23.1	1990-04-25 09:00:00	1990-04-25 19:30:00	1990-04-27	107.25	176	125	3.88392e+06
70	1990-04-26 04:30:00	1990-04-27 03:29:53	1990-04-29 19:00:00	24.2858	141.6	35.5	1990-04-27 04:00:00	1990-04-28	1990-04-30 03:00:00	126.5	768	192	4.60687e+07
71	1990-05-25 23:00:00	1990-05-26 03:29:58	1990-05-28 22:00:00	1.29964	26.3	0.2	1990-05-26 23:00:00	1990-05-28 03:30:00	1990-05-29 19:00:00	68.625	127	109	4.21484e+06
72	1990-06-01 21:00:00	1990-06-01 21:30:00	1990-06-02	0.2	0.5	18.1	1990-06-01 21:15:00	1990-06-01 21:15:00	1990-06-02 04:00:00	83	83	80	4650
73	1990-06-02 21:30:00	1990-06-03 01:30:01	1990-06-03 21:00:00	1.69987	11.3	18.6	1990-06-03	1990-06-04 02:30:00	1990-06-04 21:00:00	76.25	142	105	2.49078e+06
74	1990-06-05 04:30:00	1990-06-06 03:30:05	1990-06-07 08:00:00	9.98531	33.6	11.8	1990-06-05 04:45:00	1990-06-08	1990-06-08 12:00:00	99.7	166	144	847022
75	1990-06-20 06:00:00	1990-06-21 18:03:33	1990-06-22 02:00:00	0.5	4.3	0.2	1990-06-20 19:00:00	1990-06-22	1990-06-22 16:00:00	92.375	115	94	1.41611e+06
76	1990-07-04 19:10:00	1990-07-04 22:30:02	1990-07-06 04:00:00	1.3998	10.3	7	1990-07-04 22:00:00	1990-07-06 04:00:00	1990-07-06 18:00:00	69.875	94	81	788763
77	1992-04-15 08:00:00	1992-04-16 18:29:58	1992-04-18 04:00:00	7.89709	80.5	0	1992-04-16 11:00:00	1992-04-17 07:00:00	1992-04-18 20:00:00	124.25	281	197	1.38373e+07
78	1992-04-27 10:00:00	1992-04-27 10:30:00	1992-04-27 12:00:00	0.1	0.3	4.2	1992-04-27 11:00:00	1992-04-28 05:30:00	1992-05-01 23:00:00	91.375	107	101	9.81504e+06
79	1992-04-28 14:00:00	1992-04-29 00:29:59	1992-04-30 06:00:00	4.79992	39.4	0.3	1992-04-28 19:00:00	1992-04-30 06:30:00	1992-05-01 09:00:00	108.25	176	115	4.96611e+06
80	1992-05-17 14:15:00	1992-05-18 20:30:03	1992-05-19 02:00:00	1.09979	9.2	0	1992-05-17 19:00:00	1992-05-18 23:00:00	1992-05-19 08:00:00	62.125	83	76	860203
81	1992-06-27 11:00:00	1992-06-27 15:08:14	1992-06-28 01:00:00	0.3	1.6	0	1992-06-27 11:00:00	1992-06-27 11:15:00	1992-06-28 02:00:00	35	35	34	9000
82	1992-06-28 16:15:00	1992-06-29 00:30:01	1992-07-01 13:00:00	3.29962	35.4	1.6	1992-06-29 01:00:00	1992-06-29 10:30:00	1992-07-01 14:00:00	34.125	41	36	526577
83	1992-07-03 10:00:00	1992-07-04 00:29:58	1992-07-04 21:00:00	2.79989	17.6	37.2	1992-07-03 10:00:00	1992-07-04 16:00:00	1992-07-05	35	49	40	375075
84	1992-07-18 04:15:00	1992-07-18 13:29:56	1992-07-18 15:00:00	0.799912	3.1	0	1992-07-18 16:00:00	1992-07-18 21:30:00	1992-07-19 12:00:00	30.625	101	45	1.15646e+06
85	1992-08-31 04:20:00	1992-08-31 21:28:05	1992-09-01 04:00:00	0.3	7.2	0	1992-08-31 10:00:00	1992-08-31 10:30:00	1992-09-01 07:00:00	21.625	22	21	22621.9
86	1992-09-03 20:30:00	1992-09-04 03:29:58	1992-09-04 11:00:00	1.09989	6.3	7.2	1992-09-04 10:00:00	1992-09-04 18:30:00	1992-09-07 20:00:00	21.125	26	22	738738
87	1992-10-01 15:15:00	1992-10-01 21:30:05	1992-10-03 08:00:00	4.29849	31.3	0.3	1992-10-02 16:00:00	1992-10-02 16:30:00	1992-10-03 09:00:00	24.625	25	24	13769.7
88	1992-11-06 23:20:00	1992-11-07 04:29:57	1992-11-09 07:00:00	5.29934	47.4	6.2	1992-11-07	1992-11-07 10:30:00	1992-11-09 10:00:00	39.125	119	43	3.37848e+06
89	1992-11-10 04:06:39	1992-11-10 05:29:57	1992-11-10 09:00:00	1.09968	5	47.4	1992-11-10 04:21:39	1992-11-10 04:30:00	1992-11-10 10:00:00	40	40	39	1472.73
90	1992-11-11 08:20:00	1992-11-11 11:29:55	1992-11-12 09:00:00	3.09875	27.1	52.4	1992-11-11 18:00:00	1992-11-12 07:00:00	1992-11-13 07:00:00	37.625	69	54	1.78503e+06
91	1992-11-20 20:20:00	1992-11-21 03:29:59	1992-11-22 20:00:00	7.99995	75.4	37.1	1992-11-21 05:00:00	1992-11-21 22:30:00	1992-11-23 16:00:00	36.75	340	101	1.75972e+07
92	1992-11-26 23:06:39	1992-11-27 00:29:57	1992-11-29 06:00:00	3.59786	23.2	0	1992-11-27 08:00:00	1992-11-27 19:00:00	1992-11-29 07:00:00	57	75	60	1.54174e+06
93	1993-03-12 09:00:00	1993-03-12 14:29:59	1993-03-12 22:00:00	0.399998	3.1	8.7	1993-03-12 09:15:00	1993-03-12 09:15:00	1993-03-13	53	53	52	9709.32
94	1993-03-13 11:00:00	1993-03-17 03:29:56	1993-03-20 04:00:00	4.79857	201.2	11.8	1993-03-14 02:00:00	1993-03-18 12:30:00	1993-03-20 12:00:00	50.125	372	264	2.44062e+07
95	1993-03-21 04:20:00	1993-03-23 08:29:59	1993-03-24 23:00:00	2.19996	55.8	0	1993-03-22 14:00:00	1993-03-23 09:30:00	1993-03-25	168.375	480	265.125	2.55662e+07
96	1993-06-14 12:00:00	1993-06-14 18:30:01	1993-06-15 08:00:00	0.399969	4.4	6	1993-06-14 12:15:00	1993-06-16	1993-06-16 17:00:00	142	142	115	5188.24
97	1993-06-28 02:00:00	1993-06-28 03:30:01	1993-06-28 16:00:00	0.299934	1.2	0.8	1993-06-28 02:15:00	1993-06-28 02:15:00	1993-06-28 17:00:00	101	101	89	51913.2
98	1993-10-10 07:00:00	1993-10-11 21:44:58	1993-10-12 16:00:00	1	12.5	9.1	1993-10-10 09:00:00	1993-10-12 15:45:00	1993-10-14 02:00:00	26	27	26	210600
99	1993-10-13 04:30:00	1993-10-14 03:29:59	1993-10-16	3.49994	26.4	12.5	1993-10-14 12:00:00	1993-10-14 20:30:00	1993-10-17	26.625	31	27	579995
100	1994-01-02 04:00:00	1994-01-03 04:30:04	1994-01-06 16:00:00	4.29723	106.5	58.5	1994-01-02 04:15:00	1994-01-06	1994-01-06 17:00:00	101	101	81	18492.4
101	1994-01-10 17:00:00	1994-01-10 23:32:37	1994-01-11 16:00:00	1.6	15.6	23.2	1994-01-10 17:15:00	1994-01-10 17:15:00	1994-01-11 17:00:00	51	51	49	36658.4
102	1994-03-29 15:15:00	1994-03-30 03:30:00	1994-03-31 15:00:00	4.79964	53.2	0.4	1994-03-29 20:00:00	1994-03-30 17:30:00	1994-04-07 05:00:00	43.125	57	53	5.20389e+06
103	1994-04-02 18:00:00	1994-04-02 18:30:00	1994-04-02 22:00:00	0.1	0.5	53.6	1994-04-02 20:00:00	1994-04-03 14:00:00	1994-04-04 06:00:00	56.125	60	57	242142
104	1994-04-03 17:00:00	1994-04-06 03:12:36	1994-04-10 04:00:00	3.7	56	54.1	1994-04-03 17:15:00	1994-04-03 17:15:00	1994-04-10 05:00:00	60	60	51.5	80864.2
105	1994-04-13 19:00:00	1994-04-13 20:37:26	1994-04-14 02:00:00	0.4	1.9	2.3	1994-04-13 19:15:00	1994-04-13 19:15:00	1994-04-14 05:00:00	53	53	52	16650
106	1994-04-18 12:00:00	1994-04-18 20:29:57	1994-04-19	1.19961	5.9	1.9	1994-04-18 18:00:00	1994-04-19 09:00:00	1994-04-20 16:00:00	93.625	140	121	3.41916e+06
107	1994-05-02 07:00:00	1994-05-02 07:30:00	1994-05-02 10:00:00	0.1	0.4	8.1	1994-05-02 07:15:00	1994-05-02 07:15:00	1994-05-02 18:00:00	56	56	54	33425.6
108	1994-05-03 05:00:00	1994-05-04 00:29:58	1994-05-04 21:00:00	1.4996	19.8	8.5	1994-05-03 05:00:00	1994-05-05 01:30:00	1994-05-14 08:00:00	56	88	78	2.67381e+07
109	1994-06-03 12:00:00	1994-06-04 04:30:00	1994-06-04 15:00:00	2.19954	12.5	11.5	1994-06-03 21:00:00	1994-06-04 23:00:00	1994-06-05 06:00:00	57.125	83	76	598991
110	1994-06-12 17:00:00	1994-06-13 03:29:59	1994-06-15 18:00:00	1.49998	26.4	0	1994-06-12 18:00:00	1994-06-13 15:00:00	1994-06-15 19:00:00	69.25	105	65	3.58512e+06
111	1994-06-16 04:20:00	1994-06-16 04:50:00	1994-06-16 07:00:00	0.266667	0.7	26.4	1994-06-16 04:35:00	1994-06-16 04:45:00	1994-06-16 15:00:00	64	64	61	47447.6
112	1994-06-17 01:12:00	1994-06-17 03:29:54	1994-06-18 03:00:00	3.59711	9.7	27.1	1994-06-17 18:00:00	1994-06-18 22:00:00	1994-06-19 06:00:00	60.125	71	66	607891
113	1994-06-25 21:00:00	1994-06-25 22:30:01	1994-06-26 08:00:00	0.199967	0.9	0	1994-06-25 21:00:00	1994-06-26 01:00:00	1994-06-26 14:00:00	56.25	61	54	235823
114	1994-07-01 17:00:00	1994-07-01 20:28:39	1994-07-02 01:00:00	0.2	1.2	0.9	1994-07-01 21:00:00	1994-07-02 07:00:00	1994-07-02 18:00:00	49.625	65	54	451116
115	1994-09-01 01:30:00	1994-09-01 03:29:58	1994-09-01 04:00:00	0.499898	0.9	0	1994-09-01 01:45:00	1994-09-01 01:45:00	1994-09-01 21:00:00	21	21	20	30255.2
116	1994-09-02 16:00:00	1994-09-03 03:30:01	1994-09-03 13:00:00	0.999739	5.9	0.9	1994-09-03 02:00:00	1994-09-04 06:00:00	1994-09-05 17:00:00	20.125	26	21	512616
117	1994-10-30 00:20:00	1994-10-31 21:29:56	1994-11-02 11:00:00	6.79969	104.6	218.8	1994-10-30 23:00:00	1994-10-31 23:30:00	1994-11-03 12:00:00	61.75	997	106	4.76343e+07
118	1994-12-17 14:00:00	1994-12-18 02:30:56	1994-12-18 22:00:00	2.2	10.2	52.8	1994-12-17 14:00:00	1994-12-17 17:00:00	1994-12-19 03:00:00	170.25	179	134	1.25067e+06
119	1994-12-24 03:10:00	1994-12-24 03:40:00	1994-12-25 01:00:00	0.516667	4.2	2.8	1994-12-24 03:25:00	1994-12-24 03:30:00	1994-12-25 02:00:00	87	87	80	7280
120	1994-12-25 14:20:00	1994-12-25 17:30:01	1994-12-27 02:00:00	2.69971	24.6	7	1994-12-26 03:00:00	1994-12-27 05:30:00	1994-12-28 12:00:00	74.5	166	132	5.06173e+06
121	1995-02-16 13:00:00	1995-02-17 03:29:58	1995-02-18 14:00:00	9.19968	80.5	59.1	1995-02-17	1995-02-19 14:00:00	1995-02-21 01:00:00	82.5	384	288.5	2.32267e+07
122	1995-03-07 21:20:00	1995-03-09 12:29:55	1995-03-09 22:00:00	7.89616	45.9	28.3	1995-03-08 07:00:00	1995-03-10 18:30:00	1995-03-12 11:00:00	74.125	130	115	5.27196e+06
123	1995-04-10 10:00:00	1995-04-12 19:31:25	1995-04-14 18:00:00	2.7	50.1	38.7	1995-04-10 17:00:00	1995-04-13 15:00:00	1995-04-14 20:00:00	65.5	78	74	709724
124	1995-05-03 05:00:00	1995-05-03 15:29:53	1995-05-06 04:00:00	3.49793	43.1	29.4	1995-05-03 20:00:00	1995-05-04 16:00:00	1995-05-06 05:00:00	104.25	130	110	2.35386e+06
125	1995-06-10 11:30:00	1995-06-10 14:30:05	1995-06-10 18:00:00	0.6	2.1	37.8	1995-06-10 20:00:00	1995-06-11 05:00:00	1995-06-11 07:00:00	77.625	85	83	52739.5
126	1995-06-11 11:30:00	1995-06-11 12:00:00	1995-06-11 13:00:00	0.2	0.4	2.1	1995-06-11 19:00:00	1995-06-12 01:00:00	1995-06-12 10:00:00	78.25	87	83	219926
127	1995-06-12 16:00:00	1995-06-15 00:30:00	1995-06-15 09:00:00	5.2998	64.5	2.5	1995-06-12 19:00:00	1995-06-15 07:30:00	1995-06-15 18:00:00	78	138	119	977562
128	1995-06-16	1995-06-16 09:10:20	1995-06-16 10:00:00	0.1	1.1	67	1995-06-16	1995-06-16 00:15:00	1995-06-16 16:00:00	123	123	103	32962.5
129	1995-06-22 05:00:00	1995-06-22 05:30:00	1995-06-22 08:00:00	0.1	0.4	15.9	1995-06-22 19:00:00	1995-06-23 01:00:00	1995-06-23 17:00:00	81.375	95	82	650313
130	1995-07-07 06:00:00	1995-07-08 18:30:00	1995-07-09 12:00:00	2.8999	34.1	7.7	1995-07-07 17:00:00	1995-07-09 04:00:00	1995-07-10 18:00:00	73.625	117	82	4.87009e+06
131	1995-08-06 16:15:00	1995-08-06 20:30:02	1995-08-07 22:00:00	2.19984	12.8	0	1995-08-06 21:00:00	1995-08-07 06:30:00	1995-08-08 20:00:00	43	62	45	1.13794e+06
132	1995-08-15 03:00:00	1995-08-15 03:30:00	1995-08-15 08:00:00	1	1.3	4.9	1995-08-15 10:00:00	1995-08-15 10:30:00	1995-08-15 12:00:00	38.625	39	38.625	1012.5
133	1995-08-16 05:00:00	1995-08-16 19:29:58	1995-08-17 18:00:00	1.09971	10.6	1.3	1995-08-16 22:00:00	1995-08-17 23:00:00	1995-08-18 21:00:00	36.125	47	38	1.00133e+06
134	1995-10-02 14:00:00	1995-10-03 03:29:57	1995-10-04 03:00:00	9.59921	41.4	0	1995-10-02 23:00:00	1995-10-03 11:00:00	1995-10-05 04:00:00	24.5	121	37	4.65607e+06
135	1995-10-15 23:00:00	1995-10-16 04:30:05	1995-10-16 20:00:00	1.89949	14.2	54.8	1995-10-15 23:00:00	1995-10-16 19:30:00	1995-10-17 14:00:00	40	62	40.375	1.13485e+06
136	1995-10-17 05:30:00	1995-10-17 15:00:04	1995-10-17 23:00:00	1.5	10.8	14.2	1995-10-17 15:00:00	1995-10-18 01:30:00	1995-10-18 22:00:00	40.625	67	40	1.17219e+06
137	1995-10-24 04:30:00	1995-10-25 18:29:53	1995-10-26 04:00:00	2.5987	23.8	10.1	1995-10-24 20:00:00	1995-10-26 09:00:00	1995-10-28	26.625	110	40	4.79938e+06
138	1995-11-21 12:00:00	1995-11-22 07:30:04	1995-11-22 15:00:00	1.39962	11.6	13.4	1995-11-21 12:00:00	1995-11-22 05:30:00	1995-11-22 18:00:00	74.5	78	72	189656
139	1995-12-06 15:00:00	1995-12-06 21:30:07	1995-12-07 10:00:00	0.3	4.2	46.9	1995-12-06 15:15:00	1995-12-06 15:30:00	1995-12-09	176	177	127	13820.2
140	1995-12-08 01:20:00	1995-12-09 03:29:58	1995-12-09 17:00:00	2.39965	32.7	51.1	1995-12-09 04:00:00	1995-12-09 20:30:00	1995-12-10 11:00:00	127	177	151.875	1.5874e+06
141	1995-12-10 11:00:00	1995-12-11 06:29:58	1995-12-14 20:00:00	5.99837	117.2	55.7	1995-12-10 14:00:00	1995-12-12 10:00:00	1995-12-17 04:00:00	153.875	510	168	7.40244e+07
142	1995-12-26 22:00:00	1995-12-27 18:29:59	1995-12-27 22:00:00	1.6999	9.4	0.3	1995-12-26 22:15:00	1995-12-26 22:15:00	1995-12-28 02:00:00	75	75	71.375	23739
143	1996-01-02 20:00:00	1996-01-02 21:30:01	1996-01-04 21:00:00	1.1999	17.5	88.5	1996-01-02 21:00:00	1996-01-03 18:30:00	1996-01-05 12:00:00	165.625	194	142	3.39882e+06
144	1996-01-05 09:00:00	1996-01-05 17:37:22	1996-01-06	1.4	8.7	17.7	1996-01-05 09:15:00	1996-01-05 09:15:00	1996-01-06 02:00:00	144	144	136	17409
145	1996-01-06 19:15:00	1996-01-07 03:29:55	1996-01-08 10:00:00	7.19485	45.1	26.4	1996-01-06 20:00:00	1996-01-08 02:30:00	1996-01-09 04:00:00	134.75	235	179	5.57774e+06
146	1996-02-03 18:00:00	1996-02-06 03:29:55	1996-02-10 02:00:00	10.5993	301.8	17.7	1996-02-05 02:00:00	1996-02-07 16:00:00	1996-02-12 16:00:00	65.125	2370	328.5	4.58879e+08
147	1996-02-12 09:30:00	1996-02-12 10:00:00	1996-02-12 19:00:00	0.105556	0.3	0	1996-02-12 09:45:00	1996-02-12 09:45:00	1996-02-13 13:00:00	351	351	278	11295.4
148	1996-02-16 03:10:00	1996-02-18 18:30:01	1996-02-20 08:00:00	3.69932	52.4	0.3	1996-02-16 15:00:00	1996-02-18 11:00:00	1996-02-21 06:00:00	195.125	420	217	2.80859e+07
149	1996-04-04 05:00:00	1996-04-05 00:57:43	1996-04-05 04:00:00	0.1	2.4	58.2	1996-04-04 05:15:00	1996-04-04 05:15:00	1996-04-05 05:00:00	82	82	79.5	7673.68
150	1996-04-07 16:30:00	1996-04-07 17:00:00	1996-04-07 20:00:00	0.2	0.7	3	1996-04-07 17:00:00	1996-04-08 19:30:00	1996-04-12 04:00:00	94.25	130	121	1.12251e+07
151	1996-04-08 17:00:00	1996-04-08 20:10:19	1996-04-08 22:00:00	0.4	1.5	3.7	1996-04-08 18:00:00	1996-04-09 09:00:00	1996-04-10 18:00:00	125.375	157	144	2.84241e+06
152	1996-05-12 15:00:00	1996-05-13 21:29:53	1996-05-16 05:00:00	3.29824	58.2	7.5	1996-05-12 18:00:00	1996-05-15 21:30:00	1996-05-16 23:00:00	98.25	307	202	2.93447e+07
153	1996-05-24 05:00:00	1996-05-25 00:57:43	1996-05-25 04:00:00	0.1	2.4	0	1996-05-24 05:15:00	1996-05-24 05:15:00	1996-05-25 07:00:00	144	144	130	15404.9
154	1996-05-26 00:30:00	1996-05-26 03:29:53	1996-05-26 10:00:00	1.29925	3.7	2.4	1996-05-26 01:00:00	1996-05-27 01:00:00	1996-05-27 18:00:00	133.875	147	135	886112
155	1996-05-31 02:00:00	1996-05-31 02:30:00	1996-05-31 06:00:00	0.1	0.4	10.4	1996-05-31 02:15:00	1996-05-31 02:15:00	1996-05-31 07:00:00	104	104	102	6489.47
156	1996-06-04	1996-06-04 00:30:00	1996-06-04 04:00:00	0.2	0.7	1.6	1996-06-04	1996-06-04 01:00:00	1996-06-04 17:00:00	167.375	170	147	381971
157	1996-06-17 05:00:00	1996-06-17 12:30:02	1996-06-17 23:00:00	0.999935	5.9	2.6	1996-06-17 05:15:00	1996-06-17 05:15:00	1996-06-18 03:00:00	91	91	88	55815.5
158	1996-06-18 08:10:00	1996-06-18 08:40:00	1996-06-19 03:00:00	0.502273	1.4	8.5	1996-06-18 08:25:00	1996-06-18 08:30:00	1996-06-19 04:00:00	86	86	82	5042.31
159	1996-06-19 20:20:00	1996-06-19 20:50:00	1996-06-19 23:00:00	0.216667	0.4	9.5	1996-06-19 21:00:00	1996-06-20 23:00:00	1996-06-21 16:00:00	79	85	82.375	339119
160	1996-06-22 05:00:00	1996-06-22 05:30:00	1996-06-22 07:00:00	0.1	0.3	7.7	1996-06-22 05:15:00	1996-06-22 05:15:00	1996-06-22 17:00:00	92	92	82	35636.2
161	1996-06-22 21:30:00	1996-06-23 01:29:55	1996-06-23 21:00:00	1.49951	17.6	8	1996-06-22 22:00:00	1996-06-23 23:00:00	1996-06-24 17:00:00	85.625	132	103	1.94132e+06
162	1996-06-29 01:00:00	1996-06-29 05:28:58	1996-06-29 07:00:00	0.2	0.8	19.2	1996-06-29 01:15:00	1996-06-29 01:15:00	1996-06-29 17:00:00	100	100	85	11078.6
163	1996-07-04 04:30:00	1996-07-04 05:00:00	1996-07-04 09:00:00	0.2	0.8	0.8	1996-07-04 04:45:00	1996-07-04 04:45:00	1996-07-04 16:00:00	110	110	92	67500
164	1996-10-14 11:30:00	1996-10-14 17:30:03	1996-10-16 09:00:00	2.19931	25.6	33.6	1996-10-14 20:00:00	1996-10-15 03:30:00	1996-10-16 10:00:00	46.125	77	48	1.49116e+06
165	1996-10-17 17:00:00	1996-10-17 23:30:01	1996-10-20 10:00:00	5.49968	72.8	56.6	1996-10-17 17:00:00	1996-10-18 07:30:00	1996-10-20 11:00:00	43.625	123	50	3.93565e+06
166	1996-10-21 14:00:00	1996-10-23 18:30:01	1996-10-25 18:00:00	4.49955	81.6	72.8	1996-10-21 22:00:00	1996-10-24 08:30:00	1996-10-25 23:00:00	46.625	191	77	7.37893e+06
167	1996-10-27 05:00:00	1996-10-28 18:30:01	1996-10-29 08:00:00	0.799896	7.5	81.6	1996-10-27 19:00:00	1996-10-28 23:30:00	1996-10-29 20:00:00	60.625	88	67	811624
168	1996-11-20 22:00:00	1996-11-21 03:29:59	1996-11-22 12:00:00	1.49999	15.1	0	1996-11-20 22:15:00	1996-11-20 22:15:00	1996-11-24	259	257.5	112	1815.25
169	1997-03-18 05:00:00	1997-03-18 07:30:02	1997-03-18 09:00:00	0.199934	0.6	95.2	1997-03-18 09:00:00	1997-03-19 08:30:00	1997-03-23 10:00:00	189.5	214	188	2.71195e+07
170	1997-03-18 20:00:00	1997-03-18 20:30:00	1997-03-18 22:00:00	0.1	0.3	95.8	1997-03-18 20:00:00	1997-03-19 22:00:00	1997-03-22 12:00:00	191	281	220	2.03755e+07
171	1997-03-19 14:00:00	1997-03-20 00:29:59	1997-03-20 04:00:00	1.2	7.8	96.1	1997-03-19 14:00:00	1997-03-20 11:30:00	1997-03-21 09:00:00	233.75	348	282.5	7.67945e+06
172	1997-03-25 22:30:00	1997-03-26 18:29:56	1997-03-27 04:00:00	1.39968	8.6	0	1997-03-25 23:00:00	1997-03-26 21:00:00	1997-03-27 06:00:00	172.375	197	188	435741
173	1997-04-18 02:05:27	1997-04-19 20:29:58	1997-04-20 23:00:00	4.9999	85.9	22.7	1997-04-18 03:00:00	1997-04-20 10:30:00	1997-04-21 21:00:00	124.25	526	294.375	2.30046e+07
174	1997-04-25 05:00:00	1997-04-26 00:57:43	1997-04-26 04:00:00	0.1	2.4	77	1997-04-25 05:15:00	1997-04-25 05:15:00	1997-04-26 07:00:00	202	202	183	11534
175	1997-04-26 17:00:00	1997-04-28 17:29:56	1997-04-29 10:00:00	1.19991	20.1	79.4	1997-04-26 18:00:00	1997-04-27 12:00:00	1997-04-29 16:00:00	180.375	220	172	5.58399e+06
176	1997-05-14 04:20:00	1997-05-14 14:23:26	1997-05-15 04:00:00	0.4	4	0	1997-05-14 15:00:00	1997-05-16 00:30:00	1997-05-16 16:00:00	291.375	358	307	5.53058e+06
177	1997-06-02 22:07:30	1997-06-03 02:29:57	1997-06-05 08:00:00	2.899	38.4	0	1997-06-03	1997-06-04 02:30:00	1997-06-05 19:00:00	205	231	172	4.3155e+06
178	1997-06-11 06:00:00	1997-06-11 09:30:03	1997-06-12 20:00:00	0.399802	5.3	0.7	1997-06-11 18:00:00	1997-06-12 03:30:00	1997-06-12 21:00:00	159	180	159	900900
179	1997-06-27 05:00:00	1997-06-28 14:29:57	1997-06-29 10:00:00	3.29907	17.8	3	1997-06-27 19:00:00	1997-06-30 10:00:00	1997-07-01 15:00:00	108.25	167	142	3.41352e+06
180	1997-06-29 19:12:00	1997-06-30 03:29:56	1997-07-01 08:00:00	4.79922	28.1	17.8	1997-06-29 20:00:00	1997-06-30 12:00:00	1997-07-01 15:00:00	115.25	178	142	3.28187e+06
181	1997-07-08 18:00:00	1997-07-09 02:30:09	1997-07-09 06:00:00	0.7	4.3	0.1	1997-07-08 18:00:00	1997-07-09 23:30:00	1997-07-10 17:00:00	119.25	188	124	2.70777e+06
182	1997-08-20 03:02:04	1997-08-20 03:32:04	1997-08-20 13:00:00	2.80344	3.9	0	1997-08-20 04:00:00	1997-08-20 19:30:00	1997-08-21 19:00:00	65	70	63	374435
183	1997-08-23 05:00:00	1997-08-24 02:30:00	1997-08-24 04:00:00	6.49949	26	3.9	1997-08-24	1997-08-24 07:30:00	1997-08-25 13:00:00	62.25	79	65	753463
184	1997-09-13 14:00:00	1997-09-14 04:30:04	1997-09-18 11:00:00	5.99952	86.9	25.9	1997-09-13 22:00:00	1997-09-17 11:30:00	1997-09-19 08:00:00	52	172	67	1.11514e+07
185	1997-10-01 09:20:00	1997-10-04 23:29:57	1997-10-05 04:00:00	3.19966	73.5	13.3	1997-10-01 15:00:00	1997-10-05 02:00:00	1997-10-06 18:00:00	46.375	250	88	1.30428e+07
186	1997-10-27 04:30:00	1997-10-27 05:30:03	1997-10-27 10:00:00	0.5998	1.7	3.1	1997-10-27 04:45:00	1997-10-27 09:45:00	1997-10-28 14:00:00	48	48	47	57170.3
187	1997-10-28 08:00:00	1997-10-29 09:29:59	1997-10-31 04:00:00	9.59984	168.9	4.8	1997-10-28 15:00:00	1997-10-30 21:30:00	1997-11-03 07:00:00	47.5	976	114	1.0108e+08
188	1997-11-22 03:30:00	1997-11-23 20:30:03	1997-11-25 02:00:00	1.99992	35.2	27.9	1997-11-23 06:00:00	1997-11-24 04:00:00	1997-11-25 06:00:00	58.25	88	80	1.17197e+06
189	1997-12-15 11:00:00	1997-12-15 15:29:58	1997-12-17 09:00:00	5.59843	67.5	11.7	1997-12-15 14:00:00	1997-12-16 23:00:00	1997-12-17 20:00:00	48.125	123	83	2.20872e+06
190	1998-01-15 23:06:00	1998-01-16 02:30:02	1998-01-17 22:00:00	4.29823	50.5	226.6	1998-01-16 02:00:00	1998-01-17 15:30:00	1998-01-18 12:00:00	85	202	165	4.9648e+06
191	1998-01-25 13:30:00	1998-01-26 20:29:57	1998-01-28	2.49976	20.7	54.8	1998-01-25 17:00:00	1998-01-26 23:00:00	1998-01-28 01:00:00	94.25	106	102	781856
192	1998-02-16 14:30:00	1998-02-17 13:12:03	1998-02-20 01:00:00	1.1	30.1	0	1998-02-17 06:00:00	1998-02-21 01:00:00	1998-02-21 17:00:00	65	76	73	236654
193	1998-02-20 13:20:00	1998-02-21 03:29:56	1998-02-22 17:00:00	6.29962	68.9	30.1	1998-02-20 14:00:00	1998-02-21 03:30:00	1998-02-22 20:00:00	67	80	68	820775
194	1998-03-20 04:10:00	1998-03-21 23:30:01	1998-03-23 14:00:00	6.79831	90.3	4.2	1998-03-20 15:00:00	1998-03-23 21:00:00	1998-03-25 13:00:00	71.25	269	178	2.04766e+07
195	1998-05-02 14:04:17	1998-05-02 16:29:54	1998-05-02 17:00:00	4.49476	6.8	9.4	1998-05-02 16:00:00	1998-05-03 02:00:00	1998-05-03 17:00:00	215.125	244	188	1.65032e+06
196	1998-06-02 22:00:00	1998-06-03 00:29:56	1998-06-03 02:00:00	0.299899	0.8	58.3	1998-06-02 22:00:00	1998-06-02 22:15:00	1998-06-03 06:00:00	119	119	114	40500
197	1998-06-03 12:00:00	1998-06-03 16:29:58	1998-06-03 21:00:00	0.999895	5.2	59.1	1998-06-03 20:00:00	1998-06-04 21:00:00	1998-06-05 16:00:00	104	121	106	1.36007e+06
198	1998-06-09 12:30:00	1998-06-10 03:29:56	1998-06-10 16:00:00	2.49989	16.2	10	1998-06-09 16:00:00	1998-06-10 19:30:00	1998-06-11 16:00:00	108.25	159	112	4.97222e+06
199	1998-10-07 15:00:00	1998-10-08 06:29:59	1998-10-10 03:00:00	1.59997	26.7	0	1998-10-08 09:00:00	1998-10-09 02:00:00	1998-10-11 20:00:00	35.625	42	37	1.06262e+06
200	1998-11-27 05:00:00	1998-11-27 05:30:00	1998-11-27 09:00:00	0.2	0.6	0	1998-11-27 05:15:00	1998-11-27 05:15:00	1998-11-28 16:00:00	135	135	86	3849.28
201	1998-11-28 20:00:00	1998-12-02 03:29:57	1998-12-04 15:00:00	15.7988	167.9	0.6	1998-11-30 04:00:00	1998-12-02 09:30:00	1998-12-04 18:00:00	71.25	165	79	6.78709e+06
202	1998-12-09 23:20:00	1998-12-10 15:30:04	1998-12-12 23:00:00	1.89936	46.5	29.2	1998-12-10 13:00:00	1998-12-13 07:30:00	1998-12-15 03:00:00	52.625	154	112	1.04462e+07
203	1999-01-11 10:00:00	1999-01-11 15:29:59	1999-01-12 22:00:00	3.49998	17.6	5.5	1999-01-11 10:00:00	1999-01-11 10:15:00	1999-01-13	80	80	76	44597.4
204	1999-04-19 09:00:00	1999-04-19 17:36:28	1999-04-20 08:00:00	0.4	3.2	1.2	1999-04-19 09:00:00	1999-04-20 16:00:00	1999-04-21 15:00:00	97.25	123	116	1.94037e+06
205	1999-04-21 06:00:00	1999-04-21 19:38:16	1999-04-22 02:00:00	0.4	3.3	4.4	1999-04-21 06:15:00	1999-04-21 06:15:00	1999-04-22 03:00:00	121	121	112	14486.7
206	1999-04-22 15:00:00	1999-04-22 15:30:00	1999-04-22 17:00:00	0.2	0.4	7.7	1999-04-22 15:00:00	1999-04-22 15:15:00	1999-04-22 23:00:00	108	108	106	27000
207	1999-04-25 08:15:00	1999-04-25 08:45:00	1999-04-25 10:00:00	0.375	0.7	6.9	1999-04-25 10:00:00	1999-04-26 05:00:00	1999-04-27 04:00:00	121.25	144	137	1.35892e+06
208	1999-04-30 18:00:00	1999-05-03 02:30:00	1999-05-04 20:00:00	1.09999	43.9	7	1999-04-30 18:00:00	1999-05-02 04:30:00	1999-05-05 03:00:00	110	135	110	5.5044e+06
209	1999-05-15 20:30:00	1999-05-17 12:29:55	1999-05-18 20:00:00	1.99988	25.7	22	1999-05-15 21:00:00	1999-05-19 04:30:00	1999-05-21 15:00:00	89	205	170	1.24465e+07
210	1999-05-20 05:00:00	1999-05-20 05:30:00	1999-05-20 10:00:00	0.1	0.6	25.7	1999-05-20 05:15:00	1999-05-20 05:15:00	1999-05-20 13:00:00	188	188	178	35971
211	1999-05-20 21:00:00	1999-05-20 21:30:00	1999-05-21 02:00:00	0.1	0.6	26.3	1999-05-20 21:00:00	1999-05-20 21:15:00	1999-05-21 03:00:00	183	183	181.875	10673.4
212	1999-05-25	1999-05-25 03:29:57	1999-05-25 04:00:00	0.299932	1	1.2	1999-05-25	1999-05-26 02:00:00	1999-05-26 21:00:00	301.75	362	288	5.19214e+06
213	1999-05-31 15:00:00	1999-05-31 18:30:09	1999-06-01 20:00:00	0.4	4.4	2.5	1999-05-31 15:00:00	1999-06-01 08:30:00	1999-06-03 17:00:00	220.375	341	180	1.50795e+07
214	1999-06-05 04:15:00	1999-06-05 05:33:23	1999-06-06 21:00:00	1	6.7	4.4	1999-06-05 05:00:00	1999-06-06 01:00:00	1999-06-08 18:00:00	226	269	140	7047000
215	1999-06-20 11:00:00	1999-06-20 19:29:57	1999-06-21 08:00:00	1.09972	5.6	2.4	1999-06-21 02:00:00	1999-06-22 03:30:00	1999-06-22 17:00:00	203.875	234	219.25	908018
216	1999-06-21 22:00:00	1999-06-22 00:30:02	1999-06-22 02:00:00	0.1	0.4	8	1999-06-21 22:00:00	1999-06-23 01:30:00	1999-06-23 16:00:00	221.875	259	221.125	2.13355e+06
217	1999-06-24 04:08:34	1999-06-24 05:38:47	1999-06-26 10:00:00	1	16.1	8.4	1999-06-24 14:00:00	1999-06-25 03:00:00	1999-06-26 19:00:00	241.375	358	183	9.28308e+06
218	1999-06-27	1999-06-27 05:29:59	1999-06-27 09:00:00	0.499998	3	16.5	1999-06-27 00:15:00	1999-06-27 00:15:00	1999-06-27 18:00:00	183	183	159	202513
219	1999-08-02 18:30:00	1999-08-02 20:07:26	1999-08-02 22:00:00	0.4	1.2	0.4	1999-08-02 19:00:00	1999-08-03 22:00:00	1999-08-04 15:00:00	120.5	137	110	1.69642e+06
220	1999-08-10 19:00:00	1999-08-10 20:30:01	1999-08-11 04:00:00	2.89907	3.8	19.1	1999-08-10 19:00:00	1999-08-11 02:30:00	1999-08-11 16:00:00	109.5	123	106	623100
221	1999-10-08 07:00:00	1999-10-08 15:51:18	1999-10-08 20:00:00	0.6	3.7	7.4	1999-10-08 20:00:00	1999-10-09 02:00:00	1999-10-09 20:00:00	49.125	57	51	273934
222	1999-10-25 12:00:00	1999-10-26 07:30:04	1999-10-28 19:00:00	8.49525	107.7	0	1999-10-25 22:00:00	1999-10-27 23:00:00	1999-10-29 14:00:00	45.625	123	64	4.55204e+06
223	1999-11-03 14:00:00	1999-11-03 18:29:58	1999-11-04 06:00:00	1.09997	9.5	3.9	1999-11-03 18:00:00	1999-11-04 05:00:00	1999-11-04 18:00:00	52	83	63	687656
224	1999-11-04 23:00:00	1999-11-05 15:29:42	1999-11-06 01:00:00	4	26.4	13.4	1999-11-05 14:00:00	1999-11-06 03:00:00	1999-11-07 12:00:00	57.5	135	69	4404375
225	1999-11-24 04:00:00	1999-11-24 12:29:57	1999-11-26 10:00:00	6.39744	157.4	52.1	1999-11-24 11:00:00	1999-11-26 06:00:00	1999-11-29 14:00:00	53.125	1940	154	1.9226e+08
226	2000-01-31 14:30:00	2000-01-31 17:29:59	2000-02-04 10:00:00	3.69999	55.5	7.2	2000-01-31 15:00:00	2000-02-02 01:30:00	2000-02-04 13:00:00	47.625	208	121	1.53732e+07
227	2000-04-08 12:00:00	2000-04-08 21:29:58	2000-04-09 02:00:00	0.299963	1.4	0	2000-04-09	2000-04-09 21:30:00	2000-04-10 10:00:00	126.875	140	135	284934
228	2000-04-21 15:00:00	2000-04-22 03:29:56	2000-04-23	0.799894	6.4	0	2000-04-21 18:00:00	2000-04-22 08:30:00	2000-04-23 11:00:00	160.875	188	157	2.33238e+06
229	2000-04-28 07:00:00	2000-04-28 11:40:17	2000-04-28 19:00:00	0.4	3.1	9.8	2000-04-28 07:15:00	2000-04-28 07:15:00	2000-04-28 20:00:00	108	108	106	7605.88
230	2000-05-01 13:00:00	2000-05-01 20:30:02	2000-05-02 08:00:00	1.39968	6.2	5.6	2000-05-01 14:00:00	2000-05-03 01:00:00	2000-05-05 01:00:00	104	140	130	4.5146e+06
231	2000-05-07 09:00:00	2000-05-09 09:29:56	2000-05-11 15:00:00	1.99991	56.8	26.4	2000-05-07 23:00:00	2000-05-09 20:00:00	2000-05-11 16:00:00	102.25	165	121	5.87746e+06
232	2000-05-18 19:20:00	2000-05-18 21:29:59	2000-05-18 23:00:00	1.6	3.6	9.2	2000-05-18 20:00:00	2000-05-19 23:00:00	2000-05-20 17:00:00	125.375	183	163.5	2.59814e+06
233	2000-05-24 05:00:00	2000-05-25 00:57:43	2000-05-25 04:00:00	0.1	2.4	4	2000-05-24 05:15:00	2000-05-24 05:15:00	2000-05-25 22:00:00	223	221.5	162	652608
234	2000-05-25 22:00:00	2000-05-27 10:36:01	2000-05-28 01:00:00	0.5	10	2.8	2000-05-26 14:00:00	2000-05-27 22:00:00	2000-05-28 17:00:00	154.375	262	186	5.94284e+06
235	2000-06-07 06:00:00	2000-06-08 00:29:57	2000-06-08 19:00:00	1.49957	14.7	0	2000-06-07 21:00:00	2000-06-08 09:00:00	2000-06-09 02:00:00	116	149	140	1.04946e+06
236	2000-06-09 09:00:00	2000-06-12 02:29:59	2000-06-12 20:00:00	2.89995	53.8	14.7	2000-06-09 20:00:00	2000-06-12 17:30:00	2000-06-13 16:00:00	123.25	334	205	9.88197e+06
237	2000-10-17 23:00:00	2000-10-18 02:29:57	2000-10-18 06:00:00	0.999795	3.3	0.4	2000-10-18 07:00:00	2000-10-18 08:30:00	2000-10-24 22:00:00	38.625	40	38	5.04513e+06
238	2000-10-20 00:15:00	2000-10-20 06:29:59	2000-10-21 17:00:00	4.29957	38.2	3.3	2000-10-20 09:00:00	2000-10-20 17:00:00	2000-10-22 01:00:00	39.625	96	49	2.94345e+06
239	2000-10-25 13:00:00	2000-10-28 02:33:12	2000-10-28 07:00:00	3.7	25.4	38.2	2000-10-28 03:00:00	2000-10-28 11:30:00	2000-10-29 19:00:00	38.125	45	39	375596
240	2000-11-01 12:00:00	2000-11-01 17:30:05	2000-11-02 15:00:00	1.89867	12.9	0.3	2000-11-01 12:15:00	2000-11-01 12:15:00	2000-11-02 16:00:00	37	37	36	1427.03
241	2000-11-04 07:30:00	2000-11-04 12:29:56	2000-11-04 13:00:00	1.7014	2.4	12.9	2000-11-04 08:00:00	2000-11-04 16:30:00	2000-11-04 22:00:00	37	46	42	81112.5
242	2000-11-05 13:30:00	2000-11-05 21:29:59	2000-11-06 07:00:00	1.49999	12.9	15.3	2000-11-05 13:45:00	2000-11-05 13:45:00	2000-11-06 08:00:00	39	39	38	1479.45
243	2000-11-07 12:00:00	2000-11-08 00:30:02	2000-11-10 01:00:00	6.89937	53.2	15.3	2000-11-08 03:00:00	2000-11-08 11:00:00	2000-11-10 03:00:00	37.625	42	38	309096
244	2000-11-23 07:12:00	2000-11-23 09:30:00	2000-11-24 03:00:00	2.1999	17.9	0.8	2000-11-23 10:00:00	2000-11-23 19:30:00	2000-11-24 06:00:00	32.125	39	36	197512
245	2000-11-25 12:30:00	2000-11-25 15:30:05	2000-11-26 02:00:00	1.39966	7.2	18.7	2000-11-25 18:00:00	2000-11-25 22:30:00	2000-11-26 06:00:00	35.125	37	36	43530.5
246	2000-11-26 14:00:00	2000-11-27 03:29:57	2000-11-27 04:00:00	2.49993	8	25.9	2000-11-27 02:00:00	2000-11-27 08:30:00	2000-11-27 10:00:00	35.625	38	37	11292.2
247	2000-12-10 01:00:00	2000-12-10 08:54:29	2000-12-10 12:00:00	0.1	0.8	3.1	2000-12-10 01:15:00	2000-12-10 11:45:00	2000-12-12 15:00:00	32	32	31	108461
248	2000-12-11 10:30:00	2000-12-13 09:30:04	2000-12-15 14:00:00	2.69988	70	3.9	2000-12-13 02:00:00	2000-12-14 20:30:00	2000-12-15 15:00:00	31.625	37	33	228785
249	2000-12-16 15:30:00	2000-12-16 18:29:59	2000-12-17 04:00:00	7.59995	18.9	70	2000-12-16 16:00:00	2000-12-16 22:00:00	2000-12-17 09:00:00	34.625	40	35	172974
250	2000-12-19 06:12:00	2000-12-19 08:30:00	2000-12-19 11:00:00	0.499887	1.5	18.9	2000-12-19 12:00:00	2000-12-19 14:30:00	2000-12-20 15:00:00	33.625	35	34	105922
251	2000-12-19 22:08:34	2000-12-20 11:29:54	2000-12-20 21:00:00	1.09959	10.8	20.4	2000-12-19 22:23:34	2000-12-19 22:30:00	2000-12-20 23:00:00	35	35	34	19249
252	2000-12-21 09:30:00	2000-12-22 03:29:59	2000-12-24 03:00:00	2.29996	38.3	31.2	2000-12-21 16:00:00	2000-12-22 18:00:00	2000-12-24 05:00:00	33.125	40	38	318593
253	2000-12-31 07:00:00	2000-12-31 07:30:00	2000-12-31 10:00:00	0.1	0.4	0.7	2000-12-31 07:15:00	2000-12-31 07:15:00	2000-12-31 21:00:00	35	35	34.125	20812.5
254	2001-01-03 18:00:00	2001-01-03 21:30:03	2001-01-04	0.199901	0.6	1.1	2001-01-03 23:00:00	2001-01-04	2001-01-04 06:00:00	34.125	35	34	18506.2
255	2001-01-28 20:30:00	2001-01-28 23:29:59	2001-01-29 04:00:00	0.799999	3.9	9.3	2001-01-28 20:45:00	2001-01-29 03:45:00	2001-01-30 07:00:00	32	32	31	53793.1
256	2001-02-01 22:00:00	2001-02-02 03:29:59	2001-02-03 06:00:00	0.599996	5.5	3.9	2001-02-01 22:00:00	2001-02-02 13:30:00	2001-02-03 07:00:00	31.375	33	32	51965.6
257	2001-02-03 17:00:00	2001-02-03 20:29:57	2001-02-04 02:00:00	1.09968	5.7	9.4	2001-02-04 09:00:00	2001-02-05 00:30:00	2001-02-10 01:00:00	32.125	38	36	649279
258	2001-02-04 18:00:00	2001-02-04 19:30:37	2001-02-05 04:00:00	0.3	1.8	11.2	2001-02-04 21:00:00	2001-02-05 03:00:00	2001-02-05 06:00:00	35.625	39	38	27462.5
259	2001-03-15 03:30:00	2001-03-19 01:30:05	2001-03-19 08:00:00	1	28.8	1.3	2001-03-16 08:00:00	2001-03-19 22:00:00	2001-03-21 01:00:00	35	69	60	942179
260	2001-03-24 15:20:00	2001-03-25 00:29:56	2001-03-26 04:00:00	4.19849	22.9	0	2001-03-24 16:00:00	2001-03-25 07:30:00	2001-03-26 12:00:00	54.125	72	67	941651
261	2001-03-31 04:30:00	2001-03-31 14:29:56	2001-04-03 16:00:00	1.6999	25.3	39.1	2001-03-31 12:00:00	2001-03-31 23:30:00	2001-04-03 19:00:00	79.125	106	70	3.83713e+06
262	2001-05-14 02:00:00	2001-05-14 15:29:57	2001-05-16 04:00:00	2.4992	56.6	0	2001-05-14 13:00:00	2001-05-16 03:00:00	2001-05-17 21:00:00	102	297	137	2.12231e+07
263	2001-06-04 14:30:00	2001-06-04 21:29:58	2001-06-06 02:00:00	0.999928	10.3	14.7	2001-06-04 22:00:00	2001-06-06 23:30:00	2001-06-07 07:00:00	56.625	67	64	193947
264	2001-06-08 17:00:00	2001-06-09 04:30:01	2001-06-09 10:00:00	0.5	3.1	10.3	2001-06-08 18:00:00	2001-06-09 21:00:00	2001-06-10 19:00:00	63.75	80	60	1.98915e+06
265	2001-06-11 04:10:00	2001-06-11 14:29:58	2001-06-12 14:00:00	2.09943	25.9	3.1	2001-06-11 17:00:00	2001-06-12 02:30:00	2001-06-12 20:00:00	56.125	96	65	1.39573e+06
266	2001-06-24 04:15:00	2001-06-24 12:30:01	2001-06-24 21:00:00	0.699953	6.7	0	2001-06-24 14:00:00	2001-06-25	2001-06-25 15:00:00	52.625	65	52	431263
267	2001-06-25 18:00:00	2001-06-25 18:30:00	2001-06-25 23:00:00	0.2	0.6	6.7	2001-06-26 16:00:00	2001-06-26 23:00:00	2001-06-29 10:00:00	48.625	61	55	2.73507e+06
268	2001-06-26 12:06:00	2001-06-26 16:30:04	2001-06-28 09:00:00	2.19967	19	7.3	2001-06-26 16:00:00	2001-06-28 00:30:00	2001-06-28 18:00:00	48.625	74	58	2.05931e+06
269	2001-10-08 04:30:00	2001-10-08 08:30:01	2001-10-08 17:00:00	1.39993	9.2	0	2001-10-08 04:45:00	2001-10-08 16:45:00	2001-10-09 21:00:00	21	21	20	69805.9
270	2001-10-10 10:30:00	2001-10-10 21:30:03	2001-10-11 15:00:00	4.0997	40.2	9.3	2001-10-10 17:00:00	2001-10-11 04:30:00	2001-10-13 20:00:00	21.625	39	25	1.59183e+06
271	2001-10-21 10:30:00	2001-10-22 14:29:59	2001-10-23 14:00:00	4.89991	62.2	0.7	2001-10-21 12:00:00	2001-10-22 23:30:00	2001-10-24 04:00:00	22	188	42	4.88943e+06
272	2001-10-27 09:00:00	2001-10-27 15:24:06	2001-10-27 22:00:00	0.8	6.7	65.3	2001-10-27 09:00:00	2001-10-27 22:00:00	2001-10-28 02:00:00	33	34	33	10800
273	2001-10-28 14:15:00	2001-10-30 04:30:01	2001-11-02 03:00:00	4.99982	89.1	9.8	2001-10-28 18:00:00	2001-10-30 22:30:00	2001-11-03 06:00:00	32.375	172	54	1.47995e+07
274	2001-11-11 15:00:00	2001-11-11 15:30:00	2001-11-11 17:00:00	0.1	0.3	0	2001-11-11 15:15:00	2001-11-11 15:15:00	2001-11-11 21:00:00	31	31	30.375	5055.16
275	2001-11-19 03:30:00	2001-11-19 18:30:02	2001-11-25 22:00:00	5.79719	153.7	22	2001-11-19 04:00:00	2001-11-22 18:30:00	2001-11-26	42.625	132	61	1.32752e+07
276	2002-01-03 07:00:00	2002-01-03 11:29:58	2002-01-03 20:00:00	1.8999	7.9	61.2	2002-01-03 07:15:00	2002-01-03 08:00:00	2002-01-03 21:00:00	52	53	52	5400
277	2002-01-05 02:00:00	2002-01-06 08:29:59	2002-01-09 02:00:00	7.49996	139.8	63.9	2002-01-05 04:00:00	2002-01-08 11:30:00	2002-01-09 19:00:00	50.625	383	221.5	1.96914e+07
278	2002-02-18 20:00:00	2002-02-19 09:29:57	2002-02-20 06:00:00	1.29953	13.3	1.6	2002-02-18 21:00:00	2002-02-19 07:00:00	2002-02-20 18:00:00	37.625	39	38.375	112984
279	2002-02-22 21:15:00	2002-02-23 00:30:01	2002-02-24 02:00:00	8.19742	30.9	24.5	2002-02-23 01:00:00	2002-02-23 19:30:00	2002-02-25 02:00:00	57.625	70	66.25	964406
280	2002-04-08 22:00:00	2002-04-09 06:29:57	2002-04-12 09:00:00	2.69966	61.5	5.8	2002-04-09	2002-04-13 09:00:00	2002-04-18 02:00:00	94	269	172	1.2661e+08
281	2002-04-13 00:20:00	2002-04-13 21:29:58	2002-04-18 04:00:00	7.59911	87.9	61.7	2002-04-13 01:00:00	2002-04-14 10:00:00	2002-04-18 06:00:00	242.875	845	167.375	8.2772e+07
282	2002-04-29 04:30:00	2002-04-30 00:52:04	2002-05-01 04:00:00	0.2	7.1	16.4	2002-04-29 08:00:00	2002-05-02 03:00:00	2002-05-06 17:00:00	84.75	100	96	8.03014e+06
283	2002-05-27 10:00:00	2002-05-27 17:30:02	2002-05-28 01:00:00	1.39961	6.5	2.7	2002-05-27 10:00:00	2002-05-29 01:00:00	2002-05-31 19:00:00	147.75	223	202.375	2.49583e+07
284	2002-05-28 12:00:00	2002-05-28 18:30:01	2002-05-29 04:00:00	1.39975	7.2	9.2	2002-05-28 12:00:00	2002-05-29 22:30:00	2002-05-30 19:00:00	192.125	348	253.375	11055375
285	2002-06-22 06:00:00	2002-06-22 14:00:05	2002-06-22 15:00:00	0.2	0.9	4.2	2002-06-22 17:00:00	2002-06-23 01:00:00	2002-06-23 15:00:00	126.125	167	140	1.54066e+06
286	2002-06-23 02:00:00	2002-06-23 02:30:00	2002-06-23 04:00:00	0.1	0.3	5.1	2002-06-23 02:00:00	2002-06-23 23:30:00	2002-06-24 17:00:00	167	172	123	1.13728e+06
287	2002-06-28 10:30:00	2002-06-29 00:29:54	2002-06-30 04:00:00	3.29988	30.7	0.3	2002-06-28 18:00:00	2002-06-29 13:00:00	2002-06-30 16:00:00	126.875	228	130	7.45005e+06
288	2002-10-03 07:00:00	2002-10-03 10:29:57	2002-10-04 04:00:00	2.49993	13.5	19.4	2002-10-03 11:00:00	2002-10-04 11:00:00	2002-10-05 19:00:00	29.5	32	30	186740
289	2002-11-16 09:20:00	2002-11-16 16:29:59	2002-11-17 08:00:00	1.99999	9.7	0	2002-11-16 17:00:00	2002-11-17	2002-11-17 09:00:00	31.125	38	35	153445
290	2002-12-09 11:00:00	2002-12-11 09:30:00	2002-12-12 02:00:00	2.99996	34	3.5	2002-12-09 14:00:00	2002-12-11 18:30:00	2002-12-12 04:00:00	23.875	37	31	178505
291	2002-12-12 12:00:00	2002-12-15 00:29:59	2002-12-16 18:00:00	3.79969	93.9	34	2002-12-12 14:00:00	2002-12-16 02:00:00	2002-12-17	29.875	68	55	2.60888e+06
292	2003-01-01 03:00:00	2003-01-02 14:29:59	2003-01-04 22:00:00	5.59985	82	50.6	2003-01-01 04:00:00	2003-01-04 19:30:00	2003-01-06 08:00:00	53.125	231	114	1.71016e+07
293	2003-01-23 21:00:00	2003-01-26 09:29:59	2003-01-27 21:00:00	3.79981	69.2	47.4	2003-01-23 23:00:00	2003-01-27	2003-01-28 20:00:00	82	503	151.25	3.69221e+07
294	2003-01-29 07:30:00	2003-01-31 14:29:55	2003-02-04 04:00:00	4.39952	132.4	69.2	2003-01-29 13:00:00	2003-01-30 22:30:00	2003-02-04 08:00:00	128.25	862	147	1.31506e+08
295	2003-03-18 12:30:00	2003-03-18 17:41:57	2003-03-18 22:00:00	0.459833	1.9	1.6	2003-03-18 12:45:00	2003-03-18 13:00:00	2003-03-19	94	96	89.25	36840
296	2003-03-19 09:00:00	2003-03-21 04:29:56	2003-03-23 22:00:00	3.99849	106.9	3.5	2003-03-19 11:00:00	2003-03-22 14:30:00	2003-03-24 10:00:00	87	265	142.25	1.25159e+07
297	2003-03-25 04:30:00	2003-03-25 21:29:58	2003-03-27 17:00:00	2.8992	56.8	106.9	2003-03-25 06:00:00	2003-03-26 05:30:00	2003-03-27 19:00:00	126.125	154	114	2.68223e+06
298	2003-03-30 05:00:00	2003-04-06 00:34:37	2003-04-06 11:00:00	1.33793	48.9	56.8	2003-03-30 05:00:00	2003-04-01 01:30:00	2003-04-06 15:00:00	93	140	77	1.05533e+07
299	2003-04-07 01:00:00	2003-04-07 06:29:59	2003-04-07 18:00:00	0.499996	4	0	2003-04-07 01:15:00	2003-04-07 01:15:00	2003-04-07 19:00:00	76	76	72	2345.07
300	2003-04-08 17:00:00	2003-04-09 00:29:56	2003-04-09 04:00:00	0.799691	2.9	4	2003-04-08 18:00:00	2003-04-10 02:00:00	2003-04-10 04:00:00	69.625	76	74	65218.6
301	2003-04-09 21:00:00	2003-04-11 18:29:59	2003-04-13 23:00:00	1.49995	33.9	6.9	2003-04-09 21:00:00	2003-04-12 01:30:00	2003-04-14 03:00:00	73.125	96	87	2.59442e+06
302	2003-06-23 01:00:00	2003-06-23 02:30:07	2003-06-23 04:00:00	0.2	0.6	7.2	2003-06-23 01:15:00	2003-06-23 02:00:00	2003-06-23 07:00:00	68	68	67	7689.13
303	2003-10-16 04:03:45	2003-10-16 06:30:04	2003-10-16 14:00:00	4.89941	18.4	12.7	2003-10-16 21:00:00	2003-10-17 11:30:00	2003-10-18 06:00:00	44.625	50	45	322371
304	2003-11-28 13:00:00	2003-11-29 05:30:00	2003-11-30 04:00:00	3.69967	47.9	22.4	2003-11-28 14:00:00	2003-11-29 14:30:00	2003-12-01 05:00:00	33.125	178	76	9.38911e+06
305	2003-11-30 14:00:00	2003-12-01 04:29:58	2003-12-01 10:00:00	1.69961	10.8	47.9	2003-11-30 14:15:00	2003-11-30 14:15:00	2003-12-01 23:00:00	92	91.5	67.125	991.031
306	2003-12-04 03:00:00	2003-12-06 02:29:55	2003-12-06 05:00:00	5.29857	52.9	74.1	2003-12-04 08:00:00	2003-12-06 05:30:00	2003-12-07 04:00:00	63.25	119	89	3.06225e+06
307	2004-01-22 23:00:00	2004-01-23 03:30:04	2004-01-25 06:00:00	3.19868	51.8	14.7	2004-01-22 23:00:00	2004-01-24 11:30:00	2004-01-25 16:00:00	45.5	100	85.5	2.0893e+06
308	2004-01-25 18:00:00	2004-01-25 18:30:00	2004-01-26 08:00:00	0.1	1	51.8	2004-01-25 18:00:00	2004-01-25 18:15:00	2004-01-26 10:00:00	86	86	79	22865.6
309	2004-01-26 22:00:00	2004-01-30 01:29:58	2004-02-01 06:00:00	4.99863	115	52.8	2004-01-27 01:00:00	2004-01-30 03:00:00	2004-02-01 11:00:00	75	256	133.5	1.75997e+07
310	2004-03-18 10:00:00	2004-03-18 13:49:23	2004-03-19 04:00:00	0.4	3.8	0	2004-03-18 10:00:00	2004-03-18 20:30:00	2004-03-19 07:00:00	95	108	102	331950
311	2004-03-23 16:00:00	2004-03-25 14:30:00	2004-03-27 04:00:00	2.69997	51.3	3.8	2004-03-23 16:00:00	2004-03-25 19:30:00	2004-03-27 09:00:00	100	114	100	1302300
312	2004-04-13 04:20:00	2004-04-14 21:29:58	2004-04-16 04:00:00	4.3988	42.3	0	2004-04-13 05:00:00	2004-04-14 01:00:00	2004-04-16 08:00:00	124.25	132	101.25	1.87992e+06
313	2004-04-23 07:30:00	2004-04-23 08:30:03	2004-04-23 22:00:00	1.89969	4.1	62.2	2004-04-23 08:00:00	2004-04-23 08:30:00	2004-04-23 23:00:00	68.625	69	68	10490.6
314	2004-05-06 10:30:00	2004-05-06 12:30:04	2004-05-06 16:00:00	1.39986	4.2	0.5	2004-05-06 10:45:00	2004-05-06 11:30:00	2004-05-06 19:00:00	128	128	114.25	7950
315	2004-05-07 13:00:00	2004-05-07 17:29:58	2004-05-09	3.39901	14.7	4.7	2004-05-07 19:00:00	2004-05-08 06:30:00	2004-05-09 01:00:00	108.25	132	119	946986
316	2004-05-17 09:00:00	2004-05-17 15:29:55	2004-05-19 04:00:00	1.59937	17.9	2	2004-05-18	2004-05-20 01:00:00	2004-05-20 13:00:00	96	116	110	807462
317	2004-05-19 21:30:00	2004-05-19 22:30:03	2004-05-20	0.7996	1.4	19.9	2004-05-19 22:00:00	2004-05-20 05:30:00	2004-05-20 09:00:00	110.25	119	113	125944
318	2004-05-20 11:00:00	2004-05-20 16:29:59	2004-05-20 20:00:00	0.399998	2.1	21.3	2004-05-20 14:00:00	2004-05-21 20:00:00	2004-05-24 06:00:00	112.5	125	119	4.22936e+06
319	2004-05-25 20:00:00	2004-05-27 12:29:59	2004-05-29 11:00:00	2.4999	54.1	20.7	2004-05-25 20:00:00	2004-05-28 03:30:00	2004-05-29 22:00:00	96	256	138.5	1.88974e+07
320	2004-05-30 19:00:00	2004-05-30 19:30:00	2004-05-30 22:00:00	0.1	0.4	54.1	2004-05-30 19:00:00	2004-05-31 00:30:00	2004-05-31 04:00:00	117.875	123	116	59615.6
321	2004-06-04 04:20:00	2004-06-04 05:50:37	2004-06-04 07:00:00	0.3	0.9	0.4	2004-06-04 05:00:00	2004-06-05 03:00:00	2004-06-05 14:00:00	134.625	144	133.125	348883
322	2004-06-05 02:06:39	2004-06-05 03:29:57	2004-06-07 04:00:00	2.19946	25.7	1.3	2004-06-05 03:00:00	2004-06-06 02:00:00	2004-06-07 17:00:00	144	172	123	3.45211e+06
323	2004-06-08 04:02:18	2004-06-08 13:29:58	2004-06-10 04:00:00	3.19969	50.6	26.6	2004-06-08 05:00:00	2004-06-10 20:30:00	2004-06-11 19:00:00	116	135	101.25	3.56891e+06
324	2004-08-23 05:00:00	2004-08-25 03:30:00	2004-08-27 03:00:00	3.69959	75.8	20.7	2004-08-24	2004-08-25 14:30:00	2004-08-27 20:00:00	46	110	52	6.33967e+06
325	2004-10-06 04:12:00	2004-10-06 04:42:00	2004-10-07	0.46	2	0	2004-10-06 06:00:00	2004-10-06 20:30:00	2004-10-08 17:00:00	28.875	32	29	307820
326	2004-10-08 03:00:00	2004-10-08 16:29:57	2004-10-09 20:00:00	4.19821	24.2	2	2004-10-08 10:00:00	2004-10-09 03:00:00	2004-10-11 16:00:00	30.5	39	32	922630
327	2004-10-22 06:00:00	2004-10-22 09:30:03	2004-10-24 04:00:00	1.3997	19.6	0	2004-10-22 16:00:00	2004-10-23 03:00:00	2004-10-24 07:00:00	39.125	49	41	617134
328	2004-10-30 01:00:00	2004-10-30 03:29:56	2004-10-31 08:00:00	1.69934	8.8	35.3	2004-10-30 06:00:00	2004-10-30 12:30:00	2004-10-31 17:00:00	35.625	39	36	258359
329	2004-11-01 05:00:00	2004-11-02 14:30:03	2004-11-03 04:00:00	3.19947	29.6	17.1	2004-11-01 08:00:00	2004-11-02 21:00:00	2004-11-03 17:00:00	35.125	112	57.5	2.43731e+06
330	2004-12-04 15:00:00	2004-12-08 03:29:57	2004-12-10 03:00:00	3.99951	113.7	3.5	2004-12-05 17:00:00	2004-12-10 11:00:00	2004-12-13 17:00:00	28	188	92	27001650
331	2004-12-10 12:20:00	2004-12-11 03:29:57	2004-12-12 04:00:00	2.4992	19.4	113.7	2004-12-10 23:00:00	2004-12-11 14:00:00	2004-12-13 17:00:00	160.875	265	92	8.76744e+06
332	2005-01-15 04:15:00	2005-01-15 15:29:59	2005-01-16 14:00:00	2.1999	21.5	0.2	2005-01-15 10:00:00	2005-01-15 23:00:00	2005-01-17 01:00:00	28	34	31	25825.4
333	2005-01-17 07:00:00	2005-01-18 03:29:59	2005-01-18 15:00:00	1.99995	28.3	21.7	2005-01-17 11:00:00	2005-01-18 14:30:00	2005-01-19 16:00:00	31.625	281	113.5	1.33385e+07
334	2005-03-26 04:03:00	2005-03-26 17:29:57	2005-03-30 14:00:00	4.59962	153.5	17	2005-03-26 08:00:00	2005-03-27 15:00:00	2005-03-30 21:00:00	34.125	413	93.5	4.22361e+07
335	2005-04-26 17:20:00	2005-04-26 17:50:00	2005-04-26 23:00:00	0.209524	0.6	79	2005-04-26 18:00:00	2005-04-27 23:00:00	2005-04-28 15:00:00	68.375	76	73	474890
336	2005-04-27 12:30:00	2005-04-27 14:29:58	2005-04-27 20:00:00	0.799898	3.4	79.6	2005-04-27 18:00:00	2005-04-28 01:30:00	2005-04-28 07:00:00	71.5	79	77	89368.3
337	2005-05-01 12:00:00	2005-05-01 17:29:59	2005-05-02 19:00:00	0.999992	5.3	5	2005-05-01 17:00:00	2005-05-03 01:00:00	2005-05-03 12:00:00	71.375	77	73	311172
338	2005-05-03 18:00:00	2005-05-03 22:29:58	2005-05-07 04:00:00	1.09983	21.9	6.3	2005-05-03 18:00:00	2005-05-06 04:00:00	2005-05-07 07:00:00	70.25	136	106	3.71324e+06
339	2005-05-07 22:00:00	2005-05-10 03:29:56	2005-05-11 04:00:00	5.69798	54.5	21.9	2005-05-07 22:00:00	2005-05-09 07:30:00	2005-05-11 07:00:00	94	108	80	2.16676e+06
340	2005-05-28 10:00:00	2005-05-28 20:29:59	2005-05-29 11:00:00	5.29985	12.6	2.5	2005-05-28 16:00:00	2005-05-29 22:30:00	2005-05-30 15:00:00	68.625	85	65	1.29665e+06
341	2005-06-13	2005-06-13 00:30:00	2005-06-13 07:00:00	0.1	0.8	3	2005-06-13	2005-06-13 23:30:00	2005-06-14 11:00:00	50	55	50	158400
342	2005-06-16 05:00:00	2005-06-16 12:30:02	2005-06-17 21:00:00	2.29904	18.2	4.5	2005-06-16 19:00:00	2005-06-17 02:00:00	2005-06-17 22:00:00	45.25	71	55.5	890469
343	2005-06-18 07:00:00	2005-06-18 14:59:59	2005-06-18 19:00:00	0.149998	1.1	19.7	2005-06-18 07:15:00	2005-06-18 07:15:00	2005-06-18 21:00:00	55	55	50.125	3348.41
344	2005-10-29 08:00:00	2005-10-29 11:29:57	2005-10-29 20:00:00	0.399932	3	39.5	2005-10-29 08:15:00	2005-10-29 09:00:00	2005-10-29 22:00:00	23	24	22.125	24582.3
345	2005-10-30 16:10:00	2005-11-01 08:29:58	2005-11-02 02:00:00	4.79985	79.1	42.5	2005-10-31 05:00:00	2005-11-01 17:30:00	2005-11-02 15:00:00	22.625	112	43	4.43827e+06
346	2005-11-03 05:00:00	2005-11-03 14:30:04	2005-11-07 16:00:00	6.79884	88.5	82.1	2005-11-03 07:00:00	2005-11-06 04:30:00	2005-11-07 18:00:00	37.625	88	45	3.46692e+06
347	2005-11-11 05:00:00	2005-11-13 02:29:59	2005-11-14 08:00:00	2.29993	42.3	0	2005-11-11 09:00:00	2005-11-14 07:30:00	2005-11-15 06:00:00	36.125	86	59	2.6381e+06
348	2005-11-24 11:06:39	2005-11-25 03:30:03	2005-11-26 09:00:00	6.29835	40.6	0	2005-11-25 01:00:00	2005-11-25 16:00:00	2005-11-26 13:00:00	32.625	82	53.625	1880250
349	2005-12-24 22:30:00	2005-12-27 21:29:02	2006-01-03 23:00:00	5.9	275.5	8.4	2005-12-25 02:00:00	2005-12-31 01:30:00	2006-01-04 08:00:00	105.5	896	117	1.18345e+08
350	2006-01-16 03:00:00	2006-01-17 15:30:00	2006-01-18 04:00:00	4.5996	86.5	0	2006-01-16 05:00:00	2006-01-17 09:00:00	2006-01-18 07:00:00	175	251	206.125	3.24668e+06
351	2006-01-31 11:00:00	2006-01-31 15:29:58	2006-02-01 08:00:00	2.99918	32.2	130.2	2006-01-31 14:00:00	2006-02-01 02:00:00	2006-02-01 13:00:00	120.25	194	158.25	1754775
352	2006-04-12 18:00:00	2006-04-13 19:29:59	2006-04-15 04:00:00	0.99998	20.8	37	2006-04-12 18:00:00	2006-04-15 13:30:00	2006-04-16 09:00:00	66.25	98	88.5	2.16419e+06
353	2006-04-29 05:00:00	2006-04-29 17:29:56	2006-04-30 01:00:00	2.49887	8.1	0	2006-04-29 05:00:00	2006-04-30 03:00:00	2006-04-30 12:00:00	138	183	165.375	832066
354	2006-05-18 13:00:00	2006-05-18 13:30:00	2006-05-18 15:00:00	0.1	0.3	0	2006-05-18 17:00:00	2006-05-19 01:00:00	2006-05-19 12:00:00	251.375	296	235.375	1.83964e+06
355	2006-05-19 02:00:00	2006-05-19 17:29:59	2006-05-20 06:00:00	1.09998	8.2	0.3	2006-05-19 13:00:00	2006-05-20 02:00:00	2006-05-20 17:00:00	235.75	296	238.75	2.44048e+06
356	2006-05-20 16:00:00	2006-05-23 18:30:03	2006-05-24 20:00:00	2.69885	39.8	8.5	2006-05-20 18:00:00	2006-05-20 21:00:00	2006-05-24 23:00:00	241.375	248	178.75	409336
357	2006-06-03 18:00:00	2006-06-04 00:30:01	2006-06-04 21:00:00	5.49921	35.7	33.8	2006-06-03 19:00:00	2006-06-04 21:00:00	2006-06-05 17:00:00	156.5	303	187	9.38528e+06
358	2006-06-09 19:20:00	2006-06-10 05:29:57	2006-06-10 11:00:00	0.399929	1.3	3.3	2006-06-09 21:00:00	2006-06-09 22:00:00	2006-06-10 12:00:00	123.25	125	117.25	86220
359	2006-06-11 18:00:00	2006-06-11 19:30:01	2006-06-11 22:00:00	0.999719	1.7	4.7	2006-06-11 19:00:00	2006-06-12 22:00:00	2006-06-13 15:00:00	108	165	132	2.79683e+06
360	2006-11-10 03:00:00	2006-11-12 17:30:01	2006-11-14 03:00:00	6.29836	94.6	0	2006-11-11 18:00:00	2006-11-13 18:00:00	2006-11-14 16:00:00	78.75	112	87.125	2.1765e+06
361	2006-11-15 12:12:00	2006-11-15 15:30:02	2006-11-16 01:00:00	2.89911	16.7	94.6	2006-11-15 13:00:00	2006-11-16 05:00:00	2006-11-18 14:00:00	82	401	112	2.27543e+07
362	2006-11-16 11:00:00	2006-11-16 11:30:00	2006-11-16 15:00:00	0.1	0.5	16.7	2006-11-16 11:15:00	2006-11-16 11:15:00	2006-11-18 14:00:00	307	303.5	112	0
363	2006-11-19 06:30:00	2006-11-19 11:29:56	2006-11-20 18:00:00	3.49928	29.4	17.2	2006-11-19 10:00:00	2006-11-20 05:00:00	2006-11-21 06:00:00	98	158	112	3.45249e+06
364	2006-12-09 03:00:00	2006-12-14 08:29:58	2006-12-15 18:00:00	6.39806	162.8	0	2006-12-09 04:00:00	2006-12-14 23:30:00	2006-12-17 09:00:00	45.625	1040	204.625	1.25372e+08
365	2006-12-22 23:15:00	2006-12-23 05:29:59	2006-12-23 22:00:00	4.59985	45	16	2006-12-23	2006-12-23 14:00:00	2006-12-24	96.75	125	112	683569
366	2006-12-24 09:00:00	2006-12-26 08:30:01	2006-12-27 13:00:00	4.79895	75.1	61	2006-12-24 12:00:00	2006-12-26 19:00:00	2006-12-27 22:00:00	105.5	180	140.75	7.78127e+06
367	2007-01-02 11:00:00	2007-01-03 03:30:00	2007-01-08 04:00:00	7.29949	167	0	2007-01-02 11:00:00	2007-01-03 14:30:00	2007-01-08 13:00:00	85.375	413	118.25	4.60462e+07
368	2007-02-13 06:00:00	2007-02-13 06:30:00	2007-02-13 14:00:00	0.2	0.8	60.4	2007-02-13 06:15:00	2007-02-13 06:15:00	2007-02-13 15:00:00	48	48	47.625	3905.36
369	2007-02-14 12:15:00	2007-02-15 09:29:53	2007-02-16 15:00:00	2.29924	44.3	61.2	2007-02-14 13:00:00	2007-02-16 21:30:00	2007-02-17 23:00:00	46.875	199	142.75	1.0913e+07
370	2007-03-08 21:00:00	2007-03-09 12:30:05	2007-03-10 02:00:00	0.999835	7	11.3	2007-03-08 21:00:00	2007-03-08 21:30:00	2007-03-10 05:00:00	61.5	62	60.25	26274
371	2007-03-10 14:00:00	2007-03-12 03:29:55	2007-03-12 11:00:00	1.39932	16.9	18.2	2007-03-10 17:00:00	2007-03-13	2007-03-14 13:00:00	60.25	222	132	1.2676e+07
372	2007-03-17 20:00:00	2007-03-17 20:30:00	2007-03-18 04:00:00	0.2	1.2	0	2007-03-17 20:00:00	2007-03-19 02:00:00	2007-03-21 10:00:00	99.25	125	107.25	4.72909e+06
373	2007-03-22 13:00:00	2007-03-22 13:30:00	2007-03-22 16:00:00	0.2	0.6	3.2	2007-03-22 13:15:00	2007-03-22 13:15:00	2007-03-22 20:00:00	96	95	91.25	8808.33
374	2007-03-23 12:00:00	2007-03-23 12:30:00	2007-03-23 20:00:00	1.7	5.5	3.8	2007-03-23 12:00:00	2007-03-24 20:00:00	2007-03-28 19:00:00	88.5	93	90	9.7276e+06
375	2007-03-24 12:00:00	2007-03-25 03:29:53	2007-03-25 10:00:00	4.99773	33.3	8.1	2007-03-24 12:00:00	2007-03-25 11:30:00	2007-03-26 01:00:00	88.875	160	139	1.38865e+06
376	2007-04-06 16:30:00	2007-04-07 09:29:58	2007-04-07 18:00:00	3.19993	20.2	0.1	2007-04-06 19:00:00	2007-04-08 04:30:00	2007-04-12 08:00:00	62.5	86	77	7.73964e+06
377	2007-04-08 15:30:00	2007-04-08 16:30:03	2007-04-10	4.79546	26	20.2	2007-04-08 17:00:00	2007-04-09 07:00:00	2007-04-10 08:00:00	83.625	110	94	1.46292e+06
378	2007-05-01 07:00:00	2007-05-01 23:30:00	2007-05-04 16:00:00	1.89973	30.6	0.1	2007-05-01 10:00:00	2007-05-01 11:00:00	2007-05-04 20:00:00	88.125	89	72.625	750597
379	2007-06-03 04:08:34	2007-06-03 15:29:58	2007-06-06 04:00:00	3.29995	32.1	0.9	2007-06-03 16:00:00	2007-06-04 01:30:00	2007-06-06 17:00:00	98.125	123	77.75	4.22223e+06
380	2007-06-09 08:00:00	2007-06-09 12:29:58	2007-06-11 03:00:00	1.19982	12	0	2007-06-09 19:00:00	2007-06-10 06:00:00	2007-06-11 17:00:00	71.75	110	77	3.11549e+06
381	2007-06-24 15:00:00	2007-06-24 15:30:00	2007-06-24 19:00:00	0.2	0.7	0	2007-06-24 18:00:00	2007-06-25	2007-06-25 06:00:00	57.625	65	62	103859
382	2007-10-02 14:30:00	2007-10-02 20:29:57	2007-10-04 20:00:00	5.79859	49.6	121.8	2007-10-02 18:00:00	2007-10-03 06:00:00	2007-10-04 23:00:00	29.3125	55.9	34	1.46905e+06
383	2007-10-22 19:05:27	2007-10-22 20:29:57	2007-10-22 23:00:00	1.69959	3.6	85.1	2007-10-22 20:00:00	2007-10-23 22:00:00	2007-10-25 22:00:00	51.5	64.2	48.525	2.28192e+06
384	2007-11-09 23:00:00	2007-11-10 00:30:01	2007-11-10 11:00:00	2.4998	18.6	0.3	2007-11-09 23:00:00	2007-11-10 14:00:00	2007-11-11 01:00:00	27.3125	47.4	35.6	327939
385	2007-11-11 03:00:00	2007-11-11 03:30:00	2007-11-11 09:00:00	0.2	0.8	18.9	2007-11-11 03:00:00	2007-11-11 03:15:00	2007-11-11 10:00:00	35.9	36	35.2	1035
386	2007-11-14 23:00:00	2007-11-18 09:29:55	2007-11-20 04:00:00	4.5978	140.4	40.1	2007-11-15 02:00:00	2007-11-17 18:30:00	2007-11-21 01:00:00	51.5	375	78.9	4.09583e+07
387	2007-11-30 14:00:00	2007-11-30 14:30:00	2007-11-30 16:00:00	0.1	0.3	46.8	2007-11-30 14:00:00	2007-11-30 15:30:00	2007-11-30 21:00:00	41.0375	41.6	40.7	10700
388	2007-12-22 04:12:00	2007-12-22 11:29:54	2007-12-24 21:00:00	4.39745	65.3	102.8	2007-12-22 08:00:00	2007-12-24 01:30:00	2007-12-25 01:00:00	49.4	151	93.5	3.32271e+06
389	2008-03-07 14:00:00	2008-03-07 21:30:02	2008-03-08 20:00:00	2.19923	13.6	3.1	2008-03-07 15:00:00	2008-03-08 17:30:00	2008-03-08 23:00:00	43.95	45.4	44.4	11526.3
390	2008-03-10 16:00:00	2008-03-10 20:30:04	2008-03-11 14:00:00	1.09974	6.7	13.6	2008-03-10 16:00:00	2008-03-12 02:00:00	2008-03-16 21:00:00	45.4	53.6	51.5	2.82302e+06
391	2008-03-12 13:20:00	2008-03-15 02:29:57	2008-03-16 04:00:00	1.19964	49.1	20.3	2008-03-12 14:00:00	2008-03-13 17:30:00	2008-03-16 05:00:00	54.2875	58.2	52.725	591142
392	2008-03-17 04:30:00	2008-03-18 08:29:53	2008-03-21 15:00:00	2.49889	54.3	49.1	2008-03-17 15:00:00	2008-03-18 20:30:00	2008-03-21 19:00:00	51.6375	71.9	58.2	2.57045e+06
393	2008-05-13 11:00:00	2008-05-13 19:15:01	2008-05-14 07:00:00	0.6	4.7	3.3	2008-05-13 14:00:00	2008-05-15 03:30:00	2008-05-23 17:00:00	125.25	244	209.75	1.61473e+08
394	2008-05-24 14:00:00	2008-05-28 13:29:58	2008-05-29 21:00:00	2.99988	34	35.9	2008-05-24 15:00:00	2008-05-30 01:00:00	2008-05-30 09:00:00	180.5	241	225.5	487296
395	2008-05-31 08:00:00	2008-05-31 15:30:02	2008-05-31 22:00:00	0.199936	1	0	2008-05-31 08:15:00	2008-05-31 08:30:00	2008-06-01 09:00:00	222	225	210.25	138678
396	2008-06-02 16:00:00	2008-06-03 06:30:04	2008-06-07 10:00:00	2.69936	60.6	1	2008-06-02 19:00:00	2008-06-03 23:00:00	2008-06-07 13:00:00	186.125	307	149.25	1.52779e+07
397	2008-06-29 15:00:00	2008-06-29 16:33:43	2008-06-30 02:00:00	1.53731	3.2	0	2008-06-29 16:00:00	2008-07-01 02:00:00	2008-07-01 16:00:00	175.625	238	176.75	5.10172e+06
398	2008-11-09 07:00:00	2008-11-09 09:32:38	2008-11-10 14:00:00	0.3	4.2	10.3	2008-11-09 07:15:00	2008-11-09 07:15:00	2008-11-10 16:00:00	64.2	64.2	48.9	14331
399	2008-11-11 01:00:00	2008-11-12 23:30:00	2008-11-13 12:00:00	6.79973	87.1	14.5	2008-11-11 08:00:00	2008-11-13 04:00:00	2008-11-15 15:00:00	46.525	622	82.3625	3.82288e+07
400	2008-12-30 19:20:00	2009-01-02 04:29:59	2009-01-03 04:00:00	5.09924	100.5	0	2008-12-31 03:00:00	2009-01-02 07:30:00	2009-01-04 19:00:00	83.1125	584	147.125	5.23248e+07
401	2009-01-04 17:00:00	2009-01-08 04:30:02	2009-01-08 23:00:00	2.89987	66.2	100.5	2009-01-04 20:00:00	2009-01-08 08:30:00	2009-01-10 11:00:00	147.5	382	156.75	29420195
402	2009-02-21 22:00:00	2009-02-23 16:30:01	2009-02-26 20:00:00	4.29833	126.5	2.7	2009-02-22	2009-02-25 18:00:00	2009-02-26 21:00:00	38.8	51.5	46.4	1.27895e+06
403	2009-02-27 06:00:00	2009-02-27 23:10:41	2009-02-28 01:00:00	0.1	1.2	126.5	2009-02-27 07:00:00	2009-02-27 07:30:00	2009-02-28 02:00:00	45.775	46.4	44.0625	43999.9
404	2009-03-01 07:08:34	2009-03-02 03:30:02	2009-03-03 22:00:00	2.79894	30.4	1.2	2009-03-01 11:00:00	2009-03-03 01:00:00	2009-03-04	43.6125	51.5	48.9	405156
405	2009-04-17 01:00:00	2009-04-17 06:30:05	2009-04-18 04:00:00	0.5	3.9	43.7	2009-04-17 01:00:00	2009-04-17 02:00:00	2009-04-18 06:00:00	75.4	76.1	72.6	53224.1
406	2009-05-01 19:00:00	2009-05-04 15:30:02	2009-05-07 20:00:00	5.09961	132.3	18.5	2009-05-01 19:00:00	2009-05-07 04:00:00	2009-05-07 22:00:00	75.4	428	305.5	3.09141e+07
407	2009-05-11 20:00:00	2009-05-12 06:29:59	2009-05-12 19:00:00	0.699992	7.6	0.9	2009-05-11 21:00:00	2009-05-12	2009-05-12 20:00:00	171.75	180	158.25	566340
408	2009-05-13 11:00:00	2009-05-13 23:29:56	2009-05-14 18:00:00	3.69845	28.9	8.5	2009-05-14 01:00:00	2009-05-14 20:00:00	2009-05-15 11:00:00	173.375	321	264	7.89411e+06
409	2009-05-18 21:00:00	2009-05-19 00:30:03	2009-05-20	1.0997	7.5	28.9	2009-05-18 21:00:00	2009-05-19 05:00:00	2009-05-20 04:00:00	281.375	325	250.25	3.57306e+06
410	2009-05-29 13:15:00	2009-05-29 13:45:00	2009-05-29 15:00:00	0.325	0.5	0	2009-05-29 15:00:00	2009-05-30 02:00:00	2009-05-30 15:00:00	208	275	223.5	2.76275e+06
411	2009-05-31 14:00:00	2009-05-31 14:30:00	2009-05-31 16:00:00	0.3	0.5	0.5	2009-05-31 17:00:00	2009-05-31 22:30:00	2009-06-01 15:00:00	235	285	235.375	2.26524e+06
412	2009-06-01 13:02:30	2009-06-01 14:30:00	2009-06-02 10:00:00	7.59883	16.4	1	2009-06-01 16:00:00	2009-06-01 23:00:00	2009-06-02 18:00:00	239.875	416	264	7.40884e+06
413	2009-06-12 09:00:00	2009-06-12 16:30:02	2009-06-12 21:00:00	1.89903	4.9	18.9	2009-06-12 10:00:00	2009-06-13 00:30:00	2009-06-13 13:00:00	159	175	149.25	699881
414	2009-10-17 06:00:00	2009-10-17 12:30:01	2009-10-17 17:00:00	2.49972	7.9	75.8	2009-10-17 11:00:00	2009-10-17 23:00:00	2009-10-18 18:00:00	36.1	69.3	38.1	755133
415	2009-10-23 07:12:00	2009-10-23 11:29:57	2009-10-23 13:00:00	6.39929	18	11.1	2009-10-23 10:00:00	2009-10-24 01:30:00	2009-10-24 19:00:00	31.25	34.8	31.7	145435
416	2009-10-28 18:20:00	2009-10-29 09:29:57	2009-10-30 09:00:00	2.39928	21.3	60.8	2009-10-28 22:00:00	2009-10-31 09:00:00	2009-11-02 01:00:00	36	71.9	42.5	5.00439e+06
417	2009-10-31	2009-10-31 01:29:55	2009-11-01 01:00:00	2.39788	9.7	63.9	2009-10-31 03:00:00	2009-10-31 11:30:00	2009-11-01 09:00:00	52.725	96	50.4	1.63551e+06
418	2009-11-05 13:12:00	2009-11-05 23:29:58	2009-11-08 16:00:00	2.99916	51.5	9.7	2009-11-05 14:00:00	2009-11-06 05:00:00	2009-11-08 22:00:00	34.1	53.6	40.7	1.90613e+06
419	2009-11-26 12:00:00	2009-11-26 19:30:02	2009-11-27 20:00:00	2.89981	32	0.4	2009-11-26 12:00:00	2009-11-27 11:00:00	2009-11-28 16:00:00	34.8	46.4	41.7125	736330
420	2009-12-12 05:00:00	2009-12-12 13:29:57	2009-12-13 04:00:00	1.09968	7.2	0	2009-12-13 03:00:00	2009-12-13 13:00:00	2009-12-13 17:00:00	35.2	37.2	33.9	46719.6
421	2009-12-19 01:07:30	2009-12-19 02:30:00	2009-12-19 15:00:00	0.999968	6.4	133.2	2009-12-19 10:00:00	2009-12-20 12:00:00	2009-12-23 16:00:00	62.3	73.3	67.35	5.00504e+06
422	2009-12-20 04:20:00	2009-12-21 04:30:02	2009-12-22 10:00:00	2.99978	52.1	139.6	2009-12-20 05:00:00	2009-12-21 12:30:00	2009-12-22 21:00:00	70.7625	101	76.275	2.37792e+06
423	2009-12-31 05:00:00	2009-12-31 09:29:58	2010-01-02 14:00:00	5.59984	63.3	37.1	2009-12-31 05:00:00	2010-01-01 13:00:00	2010-01-02 18:00:00	40.1375	114	83.3	5.00025e+06
424	2010-01-04 06:00:00	2010-01-06 02:29:58	2010-01-06 15:00:00	2.69988	40.5	97.6	2010-01-04 08:00:00	2010-01-06 08:00:00	2010-01-08 11:00:00	68.8125	268	110	2.27264e+07
425	2010-01-08 11:00:00	2010-01-08 16:29:53	2010-01-09 12:00:00	1.7984	8.6	40.7	2010-01-08 11:15:00	2010-01-08 11:15:00	2010-01-09 13:00:00	110	110	103.25	2654.13
426	2010-01-09 22:00:00	2010-01-09 23:29:55	2010-01-10	0.199866	0.4	49.3	2010-01-09 22:00:00	2010-01-09 22:15:00	2010-01-10 06:00:00	101.537	102	94.3	7621.88
427	2010-01-11 23:00:00	2010-01-12 12:29:57	2010-01-14	1.49942	17.4	9.8	2010-01-12	2010-01-13 05:30:00	2010-01-14 04:00:00	78.9	89.5	80.925	576987
428	2010-01-15 12:00:00	2010-01-17 15:30:00	2010-01-17 23:00:00	2.79992	31.9	18.4	2010-01-15 15:00:00	2010-01-17 19:30:00	2010-01-18 07:00:00	71.9	106	95.15	952697
429	2010-02-14 02:06:39	2010-02-14 08:30:03	2010-02-14 18:00:00	1.4	11.9	24.8	2010-02-14 05:00:00	2010-02-15 02:00:00	2010-02-15 04:00:00	44.0625	46.4	45.4	25757
430	2010-02-15 18:00:00	2010-02-16 01:29:56	2010-02-16 12:00:00	1.59918	8.3	36.7	2010-02-15 18:00:00	2010-02-17 12:00:00	2010-02-17 17:00:00	46.275	49.4	48.525	21859.7
431	2010-02-23 12:00:00	2010-02-23 20:33:15	2010-02-24 04:00:00	1.7	19.2	0	2010-02-23 18:00:00	2010-02-24 11:30:00	2010-02-24 16:00:00	43.6125	45.4	44.4	26539.1
432	2010-02-25 21:07:30	2010-02-26 14:29:55	2010-02-26 22:00:00	1.69925	17.9	19.2	2010-02-25 23:00:00	2010-02-26 20:30:00	2010-02-27 09:00:00	42.625	54.7	50.4	308177
433	2010-03-28 02:06:00	2010-03-29 09:30:00	2010-03-31 19:00:00	5.49998	119.8	43.3	2010-03-28 10:00:00	2010-03-29 17:30:00	2010-03-31 21:00:00	42.05	108	78.9	5.94246e+06
434	2010-04-14 04:30:00	2010-04-14 21:29:58	2010-04-15 01:00:00	4.89997	29.5	41.1	2010-04-14 08:00:00	2010-04-15 01:30:00	2010-04-15 08:00:00	56.8625	64.2	61.1	89109.5
435	2010-04-20 05:00:00	2010-04-20 14:30:04	2010-04-21 07:00:00	2.19961	23.2	0	2010-04-20 06:00:00	2010-04-21 02:30:00	2010-04-21 08:00:00	81.9875	91.1	88.7	93458.2
436	2010-05-09 14:00:00	2010-05-09 21:29:56	2010-05-11 04:00:00	1.6998	18.2	0	2010-05-09 16:00:00	2010-05-10 16:30:00	2010-05-11 17:00:00	59.45	65.4	62.3	344716
437	2010-05-17 04:06:39	2010-05-18 16:30:02	2010-05-18 21:00:00	2.39928	20.8	0	2010-05-17 05:00:00	2010-05-18 03:30:00	2010-05-20 15:00:00	140.25	163	137	2.56044e+06
438	2010-06-08 16:12:00	2010-06-09 01:29:57	2010-06-11 04:00:00	1.99923	40.7	18.8	2010-06-08 19:00:00	2010-06-10 00:30:00	2010-06-11 15:00:00	197.125	347	180	1.45879e+07
439	2010-10-21 22:00:00	2010-10-21 23:30:07	2010-10-22 05:00:00	0.2	1	0	2010-10-21 22:15:00	2010-10-22 13:00:00	2010-10-22 16:00:00	27.4	28	27.4	3240
440	2010-10-22 17:30:00	2010-10-23 23:30:01	2010-10-26 21:00:00	7.3	154.8	1	2010-10-23 01:00:00	2010-10-24 13:30:00	2010-10-27 04:00:00	27.775	80.4	40.7	4.84823e+06
441	2010-11-01 03:00:00	2010-11-01 20:30:02	2010-11-02 04:00:00	0.8	7.3	35	2010-11-01 04:00:00	2010-11-02 10:00:00	2010-11-03 16:00:00	49.525	140	70.6	5.04952e+06
442	2010-11-06 05:00:00	2010-11-06 21:30:00	2010-11-08 22:00:00	3.19986	41.2	7.3	2010-11-06 16:00:00	2010-11-07 06:30:00	2010-11-09 01:00:00	56.0375	142	55.9	3.63666e+06
443	2010-11-11 15:20:00	2010-11-11 20:29:57	2010-11-12 02:00:00	1.19961	7.4	97	2010-11-11 15:35:00	2010-11-11 15:45:00	2010-11-12 07:00:00	45.4	45.4	44.4	19187.7
444	2010-11-17 10:00:00	2010-11-18 04:29:57	2010-11-19	4.79925	52.8	47	2010-11-17 13:00:00	2010-11-18 02:30:00	2010-11-19 01:00:00	58.2	87.9	64.2	1183905
445	2010-12-05 23:30:00	2010-12-06 03:30:01	2010-12-07 04:00:00	1.99991	10.1	3.4	2010-12-05 23:45:00	2010-12-05 23:45:00	2010-12-07 05:00:00	45.4	45.4	43.5	30591.2
446	2010-12-08 02:00:00	2010-12-14 03:30:03	2010-12-15 18:00:00	6.29618	167.3	13.5	2010-12-08 06:00:00	2010-12-13 08:00:00	2010-12-17 11:00:00	43.125	675	121	1.12838e+08
447	2011-01-10 21:00:00	2011-01-10 22:29:55	2011-01-10 23:00:00	0.133155	0.3	17.5	2011-01-10 21:15:00	2011-01-10 21:15:00	2011-01-11 11:00:00	48.4	48.4	46.4	41056.4
448	2011-01-11 13:00:00	2011-01-13 02:30:01	2011-01-14 20:00:00	4.9998	47.7	13.8	2011-01-11 14:00:00	2011-01-15 20:00:00	2011-01-20 15:00:00	47.65	300	199	1.91771e+08
449	2011-01-15 10:12:00	2011-01-16 12:29:59	2011-01-17 21:00:00	8.99915	100.2	48	2011-01-15 15:00:00	2011-01-16 21:30:00	2011-01-20 15:00:00	235.375	1290	199	1.36653e+08
450	2011-03-28 20:00:00	2011-03-29 21:29:59	2011-03-31 20:00:00	3.2	40	55.4	2011-03-29 04:00:00	2011-03-31 23:00:00	2011-04-03 15:00:00	50.8125	205	142	1.72183e+07
451	2011-04-01 16:00:00	2011-04-02 00:30:03	2011-04-03 03:00:00	2.69854	21.9	40	2011-04-01 16:00:00	2011-04-02 02:30:00	2011-04-03 15:00:00	183.375	199	142	2.36528e+06
452	2011-04-03 18:00:00	2011-04-03 18:30:00	2011-04-04 01:00:00	0.1	0.5	61.9	2011-04-04 15:00:00	2011-04-05 01:00:00	2011-04-06 01:00:00	125	180	146	2.83945e+06
453	2011-04-04 11:00:00	2011-04-04 18:30:02	2011-04-08 10:00:00	3.39992	55.4	22.4	2011-04-04 15:00:00	2011-04-05 02:30:00	2011-04-08 12:00:00	125	188	108	7.22622e+06
454	2011-04-13 04:12:00	2011-04-15 12:29:58	2011-04-17 03:00:00	3.49977	60.3	12	2011-04-13 05:00:00	2011-04-16 23:00:00	2011-04-17 16:00:00	79.65	140	123	1.04866e+06
455	2011-05-11 11:30:00	2011-05-11 16:00:58	2011-05-11 22:00:00	1.5	6.5	17.6	2011-05-11 17:00:00	2011-05-12 08:00:00	2011-05-13 10:00:00	93.7	112	106	1.03741e+06
456	2011-05-14 04:30:00	2011-05-14 21:30:04	2011-05-16 04:00:00	4.4	53.1	6.8	2011-05-14 17:00:00	2011-05-15 05:00:00	2011-05-16 05:00:00	107.25	121	117	696548
457	2011-05-21 04:20:00	2011-05-21 07:30:01	2011-05-21 13:00:00	0.499845	1.3	6.8	2011-05-21 05:00:00	2011-05-22 02:00:00	2011-05-22 18:00:00	113.25	125	118.25	512775
458	2011-06-05 12:12:00	2011-06-05 13:29:59	2011-06-06 09:00:00	1.09996	4.6	31.6	2011-06-05 17:00:00	2011-06-07 04:30:00	2011-06-08 20:00:00	121.25	175	139	7.19667e+06
459	2011-06-18 04:30:00	2011-06-18 19:30:02	2011-06-19 04:00:00	0.999877	8.3	8.5	2011-06-18 11:00:00	2011-06-19 03:30:00	2011-06-19 17:00:00	120.25	175	150.25	1807200
460	2011-06-27 17:00:00	2011-06-28 04:30:01	2011-06-28 13:00:00	1.0998	6	0	2011-06-27 20:00:00	2011-06-29 03:30:00	2011-07-01 18:00:00	104.25	138	108	8.576e+06
461	2011-06-29 17:00:00	2011-06-29 23:20:23	2011-06-30 04:00:00	0.2	2	6.6	2011-06-29 17:00:00	2011-06-29 22:30:00	2011-06-30 06:00:00	135.125	151	144	311047
462	2011-10-08 02:00:00	2011-10-08 02:30:00	2011-10-08 04:00:00	0.2	0.5	40.7	2011-10-08 02:15:00	2011-10-08 02:15:00	2011-10-08 19:00:00	38.1	38.1	37.2	24741.3
463	2011-10-10 03:08:34	2011-10-10 06:29:54	2011-10-11 23:00:00	4.09615	41.4	41.2	2011-10-10 08:00:00	2011-10-11 13:00:00	2011-10-12 22:00:00	37.7625	103	51.5	3.9159e+06
464	2011-11-13 17:00:00	2011-11-14 14:52:09	2011-11-15 01:00:00	0.4	4.8	16.1	2011-11-13 17:15:00	2011-11-13 17:15:00	2011-11-15 15:00:00	31.6	31.6	30.9	54453.7
465	2011-11-16 05:12:00	2011-11-16 21:30:05	2011-11-19 18:00:00	1.89968	49.6	20.1	2011-11-16 14:00:00	2011-11-17 08:00:00	2011-11-19 19:00:00	31.3375	71.9	39.8	3.08734e+06
466	2011-11-21 05:06:00	2011-11-21 17:30:01	2011-11-24	4.99968	69.3	49.6	2011-11-21 12:00:00	2011-11-23 06:30:00	2011-11-24 12:00:00	38.2	78.9	61.7	3.84813e+06
467	2011-12-25 11:00:00	2011-12-25 12:30:01	2011-12-25 22:00:00	2.29957	7.7	0	2011-12-25 11:00:00	2011-12-25 14:30:00	2011-12-25 23:00:00	29.1375	30.2	29.4	28360.5
468	2011-12-26 17:00:00	2011-12-30 08:29:55	2011-12-30 23:00:00	4.69718	159.7	7.7	2011-12-26 20:00:00	2011-12-30 07:30:00	2012-01-01 20:00:00	29.3125	1370	160	1.49423e+08
469	2012-01-23 18:00:00	2012-01-24 14:29:59	2012-01-26 08:00:00	6.39995	80.8	0	2012-01-23 23:00:00	2012-01-25 08:30:00	2012-01-27 07:00:00	167.875	440	266.375	2.91589e+07
470	2012-01-29 14:00:00	2012-01-29 21:29:56	2012-01-30 11:00:00	3.49809	19	80.9	2012-01-29 17:00:00	2012-01-30 02:00:00	2012-01-30 14:00:00	166.875	211	183	1.47218e+06
471	2012-03-12 03:00:00	2012-03-16 17:29:58	2012-03-18 18:00:00	3.89867	137.4	21.3	2012-03-12 15:00:00	2012-03-16 04:00:00	2012-03-18 21:00:00	67.5125	133	105	7.5125e+06
472	2012-03-25 10:00:00	2012-03-25 10:30:18	2012-03-25 17:00:00	0.4	1.5	118.3	2012-03-25 10:15:00	2012-03-25 10:15:00	2012-03-26	76.1	76.1	74.7	30938.7
473	2012-03-26 21:15:00	2012-03-29 19:30:03	2012-04-02	5	151	4.8	2012-03-27	2012-03-30 15:30:00	2012-04-02 01:00:00	72.075	340	178	2.50692e+07
474	2012-04-23 16:04:00	2012-04-23 19:29:57	2012-04-23 21:00:00	2.49886	5.5	0	2012-04-24 01:00:00	2012-04-24 06:30:00	2012-04-24 11:00:00	354.5	393	377.625	483286
475	2012-04-29 20:00:00	2012-04-30 01:29:59	2012-05-02 03:00:00	3.19997	22.8	54.5	2012-04-29 20:00:00	2012-05-01 02:00:00	2012-05-02 08:00:00	163.25	278	191	8.90098e+06
476	2012-05-20 22:06:39	2012-05-24 10:29:59	2012-05-25 08:00:00	2.29999	40.3	0.3	2012-05-20 23:00:00	2012-05-22 04:30:00	2012-05-25 13:00:00	139.25	238	131	1.511e+07
477	2012-06-03 13:30:00	2012-06-04 15:29:57	2012-06-06 02:00:00	4.59864	56.9	14.5	2012-06-03 20:00:00	2012-06-04 18:00:00	2012-06-06 05:00:00	160.375	202	144	5.61057e+06
478	2012-06-07 01:30:00	2012-06-07 08:29:58	2012-06-09 07:00:00	4.2999	50.6	71.4	2012-06-07 11:00:00	2012-06-08 01:30:00	2012-06-09 09:00:00	122.25	151	128.25	2.18185e+06
479	2012-06-09 20:00:00	2012-06-09 23:41:58	2012-06-10 01:00:00	0.459925	0.9	50.6	2012-06-09 20:15:00	2012-06-09 20:15:00	2012-06-10 04:00:00	119	119	115	11496.8
480	2012-06-11 19:30:00	2012-06-12 06:30:03	2012-06-13 04:00:00	0.299904	2.8	51.5	2012-06-11 20:00:00	2012-06-13 23:00:00	2012-06-14 19:00:00	103.25	163	127	5.30404e+06
481	2012-06-18 01:00:00	2012-06-18 04:30:03	2012-06-19 08:00:00	1.1998	12.8	0	2012-06-18 01:15:00	2012-06-18 01:15:00	2012-06-19 21:00:00	202	200.5	119	2031.43
482	2012-06-21 19:30:00	2012-06-23 06:30:01	2012-06-24 16:00:00	4.79813	46.4	12.8	2012-06-21 20:00:00	2012-06-23 02:30:00	2012-06-24 17:00:00	117.25	144	110	4.41634e+06
483	2012-06-25 10:12:00	2012-06-25 18:30:02	2012-06-26 17:00:00	1.69948	9.3	46.4	2012-06-25 10:27:00	2012-06-25 10:30:00	2012-06-26 19:00:00	112	112	105.5	159435
484	2012-06-30 06:12:00	2012-06-30 08:30:00	2012-07-01	0.999844	4	9.3	2012-06-30 19:00:00	2012-07-01 03:00:00	2012-07-01 14:00:00	118.25	144	131	789788
485	2012-07-03 04:15:00	2012-07-03 04:45:00	2012-07-03 11:00:00	0.375	1.5	4	2012-07-03 08:00:00	2012-07-03 18:30:00	2012-07-03 22:00:00	127	133	131	81578.6
486	2012-10-12 12:00:00	2012-10-12 18:29:55	2012-10-13 04:00:00	4.29931	32.5	0	2012-10-12 12:00:00	2012-10-13 03:00:00	2012-10-14 21:00:00	34	35.6	34	110880
487	2012-10-14 15:30:00	2012-10-15 17:31:09	2012-10-16 10:00:00	8.5	85.5	32.5	2012-10-14 17:00:00	2012-10-16 08:00:00	2012-10-17 16:00:00	34.8	170	48.65	5.82466e+06
488	2012-10-30	2012-10-30 04:30:04	2012-10-31	0.699867	4.8	88.7	2012-10-30 00:15:00	2012-10-30 00:15:00	2012-10-31 04:00:00	103	103	68	3116.76
489	2012-10-31 09:30:00	2012-10-31 13:30:01	2012-11-01 17:00:00	1.1999	13.3	93.5	2012-10-31 19:00:00	2012-11-02 00:15:00	2012-11-02 13:00:00	62.3	86.4	66.05	1.04789e+06
490	2012-11-14 16:00:00	2012-11-14 16:30:00	2012-11-14 18:00:00	0.1	0.3	39.8	2012-11-14 16:00:00	2012-11-14 16:30:00	2012-11-14 19:00:00	44.9	45.4	44.4	1762.5
491	2012-11-16 18:30:00	2012-11-17 09:30:02	2012-11-17 18:00:00	3.29866	17.8	35.9	2012-11-17	2012-11-17 22:30:00	2012-11-18	42.275	47.4	45.4	25035.9
492	2012-11-18 04:00:00	2012-11-20 00:29:58	2012-11-21 16:00:00	7.09986	148.8	18.1	2012-11-18 06:00:00	2012-11-20 10:00:00	2012-11-22 10:00:00	45.15	363	132.5	2.76143e+07
493	2012-11-23 15:00:00	2012-11-23 18:30:03	2012-11-24 18:00:00	3.69927	39.4	148.8	2012-11-23 21:00:00	2012-11-24 10:15:00	2012-11-26 11:00:00	105	241	121	1.19238e+07
494	2012-11-28 09:00:00	2012-11-28 09:30:00	2012-11-28 12:00:00	0.2	0.6	39.4	2012-11-28 09:15:00	2012-11-28 09:45:00	2012-11-28 20:00:00	92.7	92.7	87.9	5090.23
495	2013-01-23 04:30:00	2013-01-23 15:29:57	2013-01-24 08:00:00	0.799928	6	0	2013-01-23 07:00:00	2013-01-23 20:30:00	2013-01-24 17:00:00	46.15	47.4	45.65	38796
496	2013-01-24 20:00:00	2013-01-25 17:29:54	2013-01-30 19:00:00	5.69568	113.1	6	2013-01-24 20:00:00	2013-01-27 06:15:00	2013-01-31 02:00:00	45.65	52.6	49.4	1.32898e+06
497	2013-03-14 06:00:00	2013-03-14 06:30:00	2013-03-14 20:00:00	0.1	0.7	4.2	2013-03-14 06:00:00	2013-03-15 19:30:00	2013-03-18 02:00:00	64.2	77.5	73.3	2.04062e+06
498	2013-03-19 06:30:00	2013-03-20 00:29:59	2013-03-23 02:00:00	6.79976	81.6	21.5	2013-03-19 10:00:00	2013-03-20 16:15:00	2013-03-23 11:00:00	67.025	144	86.775	7.99572e+06
499	2013-03-27 10:30:00	2013-03-27 18:29:59	2013-03-27 22:00:00	0.499997	4.4	4.9	2013-03-27 11:00:00	2013-03-28 00:45:00	2013-03-28 02:00:00	70.275	73.3	70.6	15760.5
500	2013-04-04 04:06:00	2013-04-06 21:29:58	2013-04-08 06:00:00	6.19801	111	0	2013-04-04 08:00:00	2013-04-06 09:00:00	2013-04-08 14:00:00	117	261	158	2.38744e+07
501	2013-04-10 06:00:00	2013-04-10 10:29:58	2013-04-10 22:00:00	0.799965	4.3	0.1	2013-04-10 08:00:00	2013-04-11 01:00:00	2013-04-11 07:00:00	125	156	144	487771
502	2013-04-28 22:00:00	2013-04-29 06:29:57	2013-04-29 09:00:00	0.799929	4	0	2013-04-28 22:00:00	2013-04-29 14:45:00	2013-04-29 16:00:00	128.5	136	130	55331.3
503	2013-05-27 04:00:00	2013-05-28 22:30:01	2013-05-30 03:00:00	6.09941	52.6	10	2013-05-27 05:00:00	2013-05-29 16:45:00	2013-05-30 20:00:00	73.3	138	101.5	4.55313e+06
504	2013-06-20 17:00:00	2013-06-21 03:29:59	2013-06-21 13:00:00	0.399996	2.1	5.7	2013-06-20 19:00:00	2013-06-21 01:00:00	2013-06-21 17:00:00	64.5	69.3	62.9	219461
505	2013-06-23 04:07:30	2013-06-25 05:29:57	2013-06-26 15:00:00	5.49909	80.9	7.8	2013-06-23 11:00:00	2013-06-25 15:00:00	2013-06-26 17:00:00	66.7	119	88.3	3.41889e+06
506	2013-08-09 08:00:00	2013-08-09 16:29:57	2013-08-11	14.2918	21.5	0	2013-08-09 10:00:00	2013-08-09 21:45:00	2013-08-11 01:00:00	40.925	64.2	44.4	605296
507	2013-11-02 02:30:00	2013-11-07 10:30:04	2013-11-08 12:00:00	4.79834	85.4	22	2013-11-02 05:00:00	2013-11-07 16:00:00	2013-11-08 18:00:00	39.125	138	87.9	3.50715e+06
508	2013-11-18 11:30:00	2013-11-19 10:29:59	2013-11-19 20:00:00	4.79993	31.7	29.2	2013-11-18 17:00:00	2013-11-19 18:45:00	2013-11-21 08:00:00	53.35	142	78.9	6072550
509	2013-11-29 15:00:00	2013-11-29 21:30:01	2013-11-29 23:00:00	0.299969	1.2	0	2013-11-29 15:15:00	2013-11-29 15:15:00	2013-11-30 03:00:00	49.4	49.4	48.65	14462.2
510	2013-11-30 23:00:00	2013-12-02 02:29:56	2013-12-03 11:00:00	15.9993	122.6	1.2	2013-12-01 03:00:00	2013-12-02 06:30:00	2013-12-04 11:00:00	48.65	716	130	3.96272e+07
511	2014-01-07 04:30:00	2014-01-08 18:30:05	2014-01-13 10:00:00	4.29798	80.3	4	2014-01-07 05:00:00	2014-01-11 11:15:00	2014-01-13 15:00:00	40.025	68	60.5	925889
512	2014-01-27 20:00:00	2014-01-29 05:29:57	2014-01-31 14:00:00	3.99878	54.7	0	2014-01-28 16:00:00	2014-01-29 10:15:00	2014-01-31 16:00:00	43.5	213	86.775	11547660
513	2014-02-10 08:30:00	2014-02-11 20:30:03	2014-02-13 08:00:00	4.3986	89.7	90.3	2014-02-12 01:00:00	2014-02-14 08:00:00	2014-02-17 13:00:00	68.975	448	239.5	9.75389e+07
514	2014-02-13 20:30:00	2014-02-14 00:30:01	2014-02-16 11:00:00	5.99924	117.4	89.7	2014-02-14 01:00:00	2014-02-14 15:15:00	2014-02-17 13:00:00	284.5	635	239.5	41817600
515	2014-02-28 20:00:00	2014-03-05 20:29:58	2014-03-07 04:00:00	9.49982	147.9	23	2014-02-28 20:00:00	2014-03-06 03:00:00	2014-03-07 08:00:00	89.9	730	392.25	2.87512e+07
516	2014-03-08 13:08:34	2014-03-09 05:29:57	2014-03-11	4.79954	87.2	0.7	2014-03-08 15:00:00	2014-03-09 17:30:00	2014-03-12 11:00:00	251.75	913	259	8.67485e+07
517	2014-04-09 02:00:00	2014-04-09 03:29:55	2014-04-09 04:00:00	0.399866	0.8	20	2014-04-09 02:00:00	2014-04-10 01:45:00	2014-04-10 10:00:00	136.25	168	144	965053
518	2014-04-21 05:00:00	2014-04-23 17:31:11	2014-04-26 05:00:00	4.3	95.6	24.7	2014-04-21 17:00:00	2014-04-24 14:30:00	2014-04-26 10:00:00	104	173	127.5	5.46945e+06
519	2014-05-03 17:00:00	2014-05-03 23:30:01	2014-05-06 07:00:00	2.6995	24.2	0.1	2014-05-03 18:00:00	2014-05-05 01:15:00	2014-05-06 17:00:00	150.5	186	138.5	4.31304e+06
520	2014-05-08 04:15:00	2014-05-08 16:30:00	2014-05-11 03:00:00	3.19979	47.2	24.3	2014-05-08 06:00:00	2014-05-09 06:30:00	2014-05-11 16:00:00	124.5	257	157	1.36548e+07
521	2014-05-23 10:20:00	2014-05-23 11:50:13	2014-05-24 04:00:00	0.5	2.5	16.6	2014-05-23 13:00:00	2014-05-24 01:45:00	2014-05-24 18:00:00	164	202	163.5	1.90217e+06
522	2014-06-12 05:00:00	2014-06-12 05:30:00	2014-06-12 07:00:00	0.1	0.3	0	2014-06-12 16:00:00	2014-06-13 03:00:00	2014-06-14 19:00:00	100.575	127	104.5	3.42298e+06
523	2014-06-12 17:00:00	2014-06-12 22:29:53	2014-06-14 02:00:00	1.29924	13.3	0.3	2014-06-12 18:00:00	2014-06-13 23:15:00	2014-06-14 19:00:00	102.5	138	104.5	3.26588e+06
524	2014-06-25 06:30:00	2014-06-27 02:30:00	2014-06-28 08:00:00	1.89994	30.5	0	2014-06-25 18:00:00	2014-06-27 21:30:00	2014-06-28 17:00:00	89.9	156	120	4.50202e+06
525	2014-10-29 17:20:00	2014-10-30 19:29:58	2014-10-31 17:00:00	5.89915	61.5	12.5	2014-10-30 01:00:00	2014-10-31 06:45:00	2014-11-01 02:00:00	80	140	86.4	2.21731e+06
526	2014-11-24 14:20:00	2014-11-25 06:30:04	2014-11-25 20:00:00	0.99987	15.4	72.9	2014-11-24 20:00:00	2014-11-25 23:00:00	2014-11-26 14:00:00	105.5	409	241	1.23184e+07
527	2014-11-26 21:06:00	2014-11-28 20:30:01	2014-11-29 16:00:00	12.0981	57.3	83.3	2014-11-27 02:00:00	2014-11-29 00:30:00	2014-12-01 09:00:00	210	880	174	6.19773e+07
528	2014-12-16 21:00:00	2014-12-17 15:29:57	2014-12-17 17:00:00	0.599926	2.8	2.6	2014-12-16 21:15:00	2014-12-16 21:15:00	2014-12-18	81.8	81.8	76.8	18622
529	2014-12-18 10:00:00	2014-12-20 18:30:00	2014-12-22 04:00:00	5.49991	123.3	5.4	2014-12-18 14:00:00	2014-12-21 07:45:00	2014-12-24 01:00:00	74.7	1450	287	1.23055e+08
530	2015-01-17 02:03:09	2015-01-17 10:30:00	2015-01-19 14:00:00	11.4998	69.2	26.5	2015-01-17 03:00:00	2015-01-18 05:45:00	2015-01-20 16:00:00	86	644	159.5	4.62534e+07
531	2015-02-04 21:00:00	2015-02-06 02:29:58	2015-02-08 02:00:00	5.79872	75.7	55.4	2015-02-04 22:00:00	2015-02-07 17:30:00	2015-02-08 17:00:00	104.75	318	193.75	7.8028e+06
532	2015-03-11 02:00:00	2015-03-11 12:29:59	2015-03-12 01:00:00	2.39995	13.2	0	2015-03-11 02:00:00	2015-03-12 13:00:00	2015-03-12 15:00:00	49.15	51.5	49.15	49590
533	2015-03-13 20:10:00	2015-03-15 06:29:57	2015-03-15 20:00:00	11.7959	82.1	14	2015-03-13 22:00:00	2015-03-15 08:15:00	2015-03-16 16:00:00	52.05	229	120.5	8.9601e+06
534	2015-03-27 12:00:00	2015-03-27 22:29:59	2015-03-28 04:00:00	1.2	6.6	57.6	2015-03-27 14:00:00	2015-03-28 05:00:00	2015-03-28 13:00:00	67.675	91.1	81.8	324878
535	2015-05-17 16:10:00	2015-05-17 17:29:59	2015-05-18 20:00:00	2.49999	6.6	0.7	2015-05-17 17:00:00	2015-05-19 10:30:00	2015-05-19 14:00:00	46.4	49.4	47.9	20100
536	2015-05-20 10:30:00	2015-05-20 18:29:59	2015-05-20 19:00:00	6.29985	9.8	7.3	2015-05-20 11:00:00	2015-05-21 17:00:00	2015-05-25 21:00:00	48.9	52.6	51.5	2942838
537	2015-05-21 05:00:00	2015-05-21 18:30:03	2015-05-22 13:00:00	9.59627	39.4	16.5	2015-05-21 05:00:00	2015-05-22 16:45:00	2015-05-23 05:00:00	49.15	68	62.3	478527
538	2015-10-25 08:10:00	2015-10-25 11:29:56	2015-10-26 03:00:00	3.89712	14.4	0	2015-10-25 11:00:00	2015-10-26 09:30:00	2015-10-27 22:00:00	21.325	25.4	22.3	263407
539	2015-10-30 04:00:58	2015-10-31 16:30:10	2015-11-01 14:00:00	23.3007	105.3	30.9	2015-10-30 06:00:00	2015-11-01 03:15:00	2015-11-02 09:00:00	23.95	329	86.4	1.07636e+07
540	2015-11-15 02:00:00	2015-11-15 03:30:01	2015-11-19 21:00:00	5.39886	114.5	28.6	2015-11-15 04:00:00	2015-11-18 02:45:00	2015-11-21 17:00:00	44.425	386	97.2	3.49388e+07
541	2015-12-05 07:00:00	2015-12-09 03:30:01	2015-12-09 11:00:00	23.4945	157.5	49.2	2015-12-05 07:00:00	2015-12-07 20:15:00	2015-12-10 02:00:00	54.15	1080	357	7.20865e+07
542	2016-01-18 17:00:00	2016-01-19 11:29:57	2016-01-20 05:00:00	3.99955	36	43.9	2016-01-18 17:00:00	2016-01-19 13:15:00	2016-01-20 07:00:00	86	89.5	80.75	281409
543	2016-01-22 23:00:00	2016-01-23 02:29:57	2016-01-24 22:00:00	2.39973	10.9	65.7	2016-01-23	2016-01-23 05:15:00	2016-01-25 03:00:00	102.5	106	89.9	502481
544	2016-01-28 04:02:18	2016-01-29 05:29:59	2016-01-31 04:00:00	4.79965	66.7	12	2016-01-28 05:00:00	2016-01-28 19:00:00	2016-01-31 05:00:00	90.3	225	148.25	1.54699e+07
545	2016-02-13 13:30:00	2016-02-14 04:30:02	2016-02-15 03:00:00	3.89877	37.4	14.2	2016-02-13 14:00:00	2016-02-15 17:00:00	2016-02-16 12:00:00	120.5	307	258	9.12861e+06
546	2016-02-28 00:20:00	2016-02-28 11:29:58	2016-02-28 17:00:00	2.49925	10.1	24.8	2016-02-28 02:00:00	2016-02-28 15:00:00	2016-02-28 23:00:00	109.5	115	111.5	86550
547	2016-02-29 14:30:00	2016-03-01 11:30:03	2016-03-02 01:00:00	5.29941	21.5	33.9	2016-02-29 15:00:00	2016-03-01 22:00:00	2016-03-02 11:00:00	107	149	136	706040
548	2016-03-02 17:30:00	2016-03-03 00:30:04	2016-03-03 04:00:00	1.89974	6.9	55.4	2016-03-02 19:00:00	2016-03-03 07:00:00	2016-03-03 14:00:00	133.25	142	139	100238
549	2016-03-04 23:00:00	2016-03-05 22:29:57	2016-03-07 17:00:00	1.99939	20.8	38.5	2016-03-05	2016-03-06 07:15:00	2016-03-07 20:00:00	130	225	155	7.13671e+06
550	2016-03-08 11:30:00	2016-03-10 04:29:57	2016-03-10 19:00:00	3.89762	28.6	27.7	2016-03-08 13:00:00	2016-03-10 08:15:00	2016-03-11 07:00:00	139.5	178	150.5	1485600
551	2016-04-03 21:20:00	2016-04-03 23:30:05	2016-04-04 23:00:00	2.198	17.6	0	2016-04-03 22:00:00	2016-04-04 12:30:00	2016-04-05	125.5	138	126.5	504779
552	2016-05-03 11:00:00	2016-05-03 18:30:02	2016-05-04 16:00:00	1.69968	9.6	3.5	2016-05-03 16:00:00	2016-05-05 02:45:00	2016-05-05 09:00:00	108.5	131	124	658070
553	2016-05-05 15:07:30	2016-05-05 15:37:30	2016-05-06 04:00:00	0.75	1.9	9.6	2016-05-05 23:00:00	2016-05-07 02:45:00	2016-05-07 08:00:00	115	136	130.5	110720
554	2016-05-14 14:00:00	2016-05-15 09:29:58	2016-05-16 08:00:00	1.5995	14.5	1.1	2016-05-14 18:00:00	2016-05-15 22:00:00	2016-05-16 14:00:00	100.575	115	103.5	706237
555	2016-10-10 18:30:00	2016-10-10 22:30:01	2016-10-11 04:00:00	0.399968	2.3	36.6	2016-10-10 18:45:00	2016-10-10 18:45:00	2016-10-11 09:00:00	55.9	55.9	44.65	2925
556	2016-10-19 17:00:00	2016-10-19 19:29:56	2016-10-19 20:00:00	0.119838	0.3	0	2016-10-20 04:00:00	2016-10-20 20:00:00	2016-10-22 19:00:00	110.5	235	121	13854975
557	2016-10-20 06:00:00	2016-10-20 10:30:22	2016-10-22 01:00:00	1.2	18.1	0.3	2016-10-20 07:00:00	2016-10-20 22:15:00	2016-10-22 19:00:00	114.5	300	121	13468665
558	2016-10-24 13:30:00	2016-10-24 20:29:58	2016-10-25 09:00:00	0.999928	3.6	18.4	2016-10-24 15:00:00	2016-10-26 08:30:00	2016-10-28 10:00:00	84.8	89.5	81.825	2.48471e+06
559	2016-10-25 20:00:00	2016-10-25 23:30:03	2016-10-27 20:00:00	1.99991	25.2	21.7	2016-10-26	2016-10-27 06:30:00	2016-10-28 13:00:00	72.25	110	80.75	3.68091e+06
560	2016-10-28 21:20:00	2016-10-29 20:30:00	2016-11-01 07:00:00	1.89961	21	28.8	2016-10-28 22:00:00	2016-10-31 08:15:00	2016-11-02 03:00:00	77.5	99.3	80.4	1.71706e+06
561	2016-11-09 06:00:00	2016-11-09 07:30:01	2016-11-09 10:00:00	0.599967	1.8	15.4	2016-11-09 06:15:00	2016-11-09 06:15:00	2016-11-09 12:00:00	58.2	59.3	57.9	4108.7
562	2016-11-11 22:30:00	2016-11-12 09:30:03	2016-11-12 17:00:00	1.6999	10	1.8	2016-11-12 01:00:00	2016-11-12 21:30:00	2016-11-13 03:00:00	52.6	70.6	62	175588
563	2016-11-13 06:00:00	2016-11-15 05:30:01	2016-11-17 04:00:00	7.59656	82.7	11.8	2016-11-13 08:00:00	2016-11-15 10:45:00	2016-11-17 05:00:00	59.025	216	113.5	1.12188e+07
564	2016-12-19 08:00:00	2016-12-19 23:29:59	2016-12-20 15:00:00	5.39998	45	43.5	2016-12-19 08:00:00	2016-12-20 10:15:00	2016-12-22 06:00:00	43	109	86.4	4883022
565	2017-01-07 08:00:00	2017-01-07 14:30:01	2017-01-11 23:00:00	3.89978	93.5	0.2	2017-01-07 08:15:00	2017-01-09 00:15:00	2017-01-12 07:00:00	49.1	76.5	46.9	198855
566	2017-01-17 10:00:00	2017-01-17 14:30:04	2017-01-23 04:00:00	2.69947	63.2	0	2017-01-17 13:00:00	2017-01-19 13:00:00	2017-01-23 05:00:00	39.125	109	64.5	1.30618e+07
567	2017-02-15 02:00:00	2017-02-16 04:30:00	2017-02-17 01:00:00	2.69979	38.2	0	2017-02-15 03:00:00	2017-02-16 14:30:00	2017-02-17 18:00:00	96.375	243	182	8.03283e+06
568	2017-03-11 07:30:00	2017-03-11 13:30:03	2017-03-12 04:00:00	2.19961	13.4	0	2017-03-11 07:45:00	2017-03-11 08:00:00	2017-03-12 15:00:00	268	272	216.75	538528
569	2017-03-20 16:08:34	2017-03-21 10:30:00	2017-03-22 22:00:00	2.19984	21	0	2017-03-20 16:23:34	2017-03-20 16:45:00	2017-03-23	271	268	183.75	28745.3
570	2017-03-23 17:00:00	2017-03-24 02:29:58	2017-03-25 16:00:00	2.99917	44.4	21	2017-03-23 20:00:00	2017-03-24 07:45:00	2017-03-25 18:00:00	165.25	221	180.5	4.01017e+06
571	2017-03-26 05:00:00	2017-03-26 06:30:01	2017-03-28 08:00:00	1.9998	32.3	65.4	2017-03-26 07:00:00	2017-03-26 19:45:00	2017-03-28 12:00:00	167.25	175	141	1.06285e+06
572	2017-03-28 18:30:00	2017-03-29 10:29:57	2017-03-30 15:00:00	2.89907	35.9	76.7	2017-03-28 19:00:00	2017-03-30 01:45:00	2017-03-31 14:00:00	142	341	205.75	1.49836e+07
573	2017-04-05 12:00:00	2017-04-08 23:30:02	2017-04-09 02:00:00	1	24.7	4.8	2017-04-05 12:00:00	2017-04-07 06:15:00	2017-04-09 07:00:00	142.75	215	151.5	9.23563e+06
574	2017-04-29 22:15:00	2017-04-30 02:29:56	2017-04-30 10:00:00	1.59924	8.1	17.9	2017-04-29 23:00:00	2017-04-30 23:00:00	2017-05-01 05:00:00	114.5	138	131.5	197708
575	2017-05-04 11:00:00	2017-05-04 23:30:02	2017-05-06 02:00:00	2.89907	9.2	12.3	2017-05-04 13:00:00	2017-05-05 09:15:00	2017-05-06 18:00:00	214	373	244.5	1.51011e+07
576	2017-06-07 12:00:00	2017-06-08 05:29:56	2017-06-08 18:00:00	1.49922	12.2	0	2017-06-07 17:00:00	2017-06-08 20:00:00	2017-06-09 18:00:00	155.5	265	176.75	8.00132e+06
577	2017-06-12 17:00:00	2017-06-13 05:00:04	2017-06-13 16:00:00	0.2	1.1	12.5	2017-06-12 17:00:00	2017-06-13 04:15:00	2017-06-13 17:00:00	122.5	130	121	353728
578	2017-10-19 04:20:00	2017-10-21 05:30:01	2017-10-22 19:00:00	19.8986	283	0	2017-10-19 09:00:00	2017-10-22 12:30:00	2017-10-23 20:00:00	54.125	1250	207	4.93632e+07
579	2017-11-19 22:00:00	2017-11-20 05:29:56	2017-11-27 03:00:00	11.2959	203.8	49.8	2017-11-19 22:00:00	2017-11-23 20:30:00	2017-11-27 19:00:00	57.1	1100	174.5	1.48328e+08
580	2017-12-24 05:00:00	2017-12-24 19:29:58	2017-12-25 19:00:00	1.09996	13.2	11.5	2017-12-24 05:15:00	2017-12-24 05:15:00	2017-12-26	51	51	49.3	59673.7
581	2017-12-28 13:00:00	2017-12-29 17:29:57	2017-12-30 04:00:00	6.99802	45.9	17.1	2017-12-28 16:00:00	2017-12-30 03:00:00	2017-12-31 21:00:00	48.45	327	128.5	1.90375e+07
582	2018-01-07 03:03:09	2018-01-07 03:33:09	2018-01-07 23:00:00	1.8021	4.5	4.9	2018-01-07 03:18:09	2018-01-07 03:30:00	2018-01-08 08:00:00	79.1	79.1	73.5	26349.5
583	2018-01-08 08:08:34	2018-01-08 08:38:34	2018-01-08 18:00:00	0.602596	1.6	9.4	2018-01-08 15:00:00	2018-01-09 16:30:00	2018-01-10 10:00:00	73.5	82	79.1	245939
584	2018-01-09 03:08:34	2018-01-11 16:30:03	2018-01-12 10:00:00	8.49528	55.5	11	2018-01-09 04:00:00	2018-01-11 22:15:00	2018-01-13	72.1	206	147.5	4.78251e+06
585	2018-01-15 11:30:00	2018-01-15 18:30:04	2018-01-16 20:00:00	1.00431	4.2	0.2	2018-01-15 11:45:00	2018-01-15 11:45:00	2018-01-16 21:00:00	106	107	96.5	121989
586	2018-01-28 01:30:00	2018-01-28 04:44:55	2018-01-28 14:00:00	0.31664	1.1	91.7	2018-01-28 02:00:00	2018-01-28 19:00:00	2018-01-29 01:00:00	103.5	111	108	43337
587	2018-01-29 03:20:00	2018-01-30 12:30:00	2018-01-31 04:00:00	2.49951	17.8	92.8	2018-01-29 14:00:00	2018-01-30 01:15:00	2018-01-31 06:00:00	106.5	125	106.25	1.00751e+06
588	2018-02-01 05:30:00	2018-02-01 18:29:53	2018-02-02 22:00:00	6.59154	13.5	18.9	2018-02-01 10:00:00	2018-02-03 01:15:00	2018-02-03 17:00:00	97.3	167	147.5	1.83147e+06
589	2018-04-01 05:00:00	2018-04-01 22:29:56	2018-04-02 10:00:00	2.69865	7.2	4	2018-04-01 07:00:00	2018-04-01 22:45:00	2018-04-02 12:00:00	73.5	77.7	73.5	129780
590	2018-04-06 19:15:00	2018-04-07 04:29:56	2018-04-09 04:00:00	8.19411	49.9	19.7	2018-04-06 20:00:00	2018-04-07 23:15:00	2018-04-09 11:00:00	108	196	150	7967400
591	2018-04-10 02:00:00	2018-04-16 14:29:58	2018-04-18 04:00:00	3.79899	66.5	62	2018-04-10 08:00:00	2018-04-11 04:30:00	2018-04-18 07:00:00	140.5	163	96.1	3.61978e+06
592	2018-05-06 13:20:00	2018-05-06 14:29:58	2018-05-06 15:00:00	5.19979	5.6	0.6	2018-05-06 17:00:00	2018-05-07 02:45:00	2018-05-07 17:00:00	127	140	129.5	521461
593	2018-05-07 01:30:00	2018-05-07 02:00:00	2018-05-07 04:00:00	0.2	0.6	6.2	2018-05-07 02:00:00	2018-05-08 01:00:00	2018-05-08 03:00:00	138.5	142	140	21586.5
594	2018-05-08 22:01:25	2018-05-08 22:31:25	2018-05-09 02:00:00	4.20157	4.7	6.2	2018-05-08 23:00:00	2018-05-09 20:45:00	2018-05-10 08:00:00	149	165	154.5	864188
595	2018-05-25 12:00:47	2018-05-25 12:30:47	2018-05-25 22:00:00	7.51958	9.3	4.5	2018-05-25 18:00:00	2018-05-26 00:30:00	2018-05-26 05:00:00	117	125	119.5	87156.8
596	2018-10-30 16:12:00	2018-10-31 01:30:03	2018-10-31 03:00:00	1.3991	4.1	58.1	2018-10-30 16:27:00	2018-10-31 07:00:00	2018-10-31 18:00:00	26.2	27	26.2	9360
597	2018-10-31 12:06:39	2018-10-31 16:30:00	2018-11-02 10:00:00	3.89966	35.3	62.2	2018-10-31 15:00:00	2018-11-02 17:00:00	2018-11-03 08:00:00	26.4	48.7	39.4	1329165
598	2018-11-26 05:00:00	2018-11-26 08:29:57	2018-11-26 09:00:00	0.307441	0.5	49.4	2018-11-26 16:00:00	2018-11-27 09:00:00	2018-12-02 06:00:00	26.6	43.4	38.65	1.06337e+07
599	2018-11-26 23:00:00	2018-11-27 07:29:57	2018-12-02 12:00:00	5.59797	82.5	49.9	2018-11-27	2018-11-27 20:45:00	2018-12-02 14:00:00	27.2	105	37.5	1.10896e+07
600	2018-12-14 06:00:00	2018-12-14 15:29:58	2018-12-14 22:00:00	1.29964	7.1	42.8	2018-12-14 06:00:00	2018-12-14 06:45:00	2018-12-15 01:00:00	37	37.5	36.5	22950
601	2018-12-15 18:00:00	2018-12-16 13:29:58	2018-12-16 22:00:00	1.49951	10.7	39	2018-12-16 07:00:00	2018-12-16 20:00:00	2018-12-17 01:00:00	34.7	39.4	37.95	38390.6
602	2018-12-17 16:30:00	2018-12-18 19:29:58	2018-12-20 22:00:00	4.49908	95.9	17.8	2018-12-17 19:00:00	2018-12-18 20:15:00	2018-12-21 14:00:00	37.725	291	129	2.60891e+07
603	2018-12-22 18:00:00	2018-12-23 06:30:02	2018-12-25 15:00:00	3.69907	45.4	95.9	2018-12-22 23:00:00	2018-12-23 16:30:00	2018-12-25 16:00:00	101.5	119	87.6	2.26375e+06
604	2018-12-26 03:12:00	2018-12-26 16:30:01	2018-12-27 22:00:00	2.20415	11.6	45.4	2018-12-26 03:27:00	2018-12-26 04:15:00	2018-12-27 23:00:00	83.5	83.5	69.4	16760.2
605	2018-12-28 14:30:00	2018-12-28 15:29:57	2018-12-28 19:00:00	3.7976	4.2	57	2018-12-28 14:45:00	2018-12-28 14:45:00	2018-12-28 20:00:00	65.5	66.8	65.5	9945
606	2018-12-29 11:30:00	2018-12-29 21:29:56	2018-12-30 18:00:00	6.09943	27.3	15.8	2018-12-29 13:00:00	2018-12-30 02:30:00	2018-12-30 22:00:00	63.225	91	77.7	824687
607	2019-01-16 07:15:00	2019-01-16 17:12:56	2019-01-16 22:00:00	1.1	8.5	0	2019-01-16 10:00:00	2019-01-16 19:30:00	2019-01-17 01:00:00	45.5	47.7	45.5	41580
608	2019-01-18 11:02:13	2019-01-18 18:30:03	2019-01-20 12:00:00	8.79931	88.3	12.5	2019-01-18 13:00:00	2019-01-19 16:00:00	2019-01-21	44.5	163	115	7.03294e+06
609	2019-01-22 08:05:00	2019-01-22 23:32:29	2019-01-23 08:00:00	2.31661	8.6	92.9	2019-01-22 22:00:00	2019-01-23 21:30:00	2019-01-24 11:00:00	89.875	104	98.9	422269
610	2019-04-05 11:01:15	2019-04-05 11:31:15	2019-04-05 14:00:00	4.70202	8	26.6	2019-04-05 12:00:00	2019-04-05 18:30:00	2019-04-05 23:00:00	145	154	150	85172.7
611	2019-04-06 01:12:00	2019-04-07 03:29:53	2019-04-09 12:00:00	5.99593	135	34.6	2019-04-06 08:00:00	2019-04-08 16:15:00	2019-04-11 03:00:00	143.5	1090	280.5	1.25299e+08
612	2019-04-14 01:03:31	2019-04-14 01:33:31	2019-04-14 07:00:00	1.60176	2.3	21.7	2019-04-14 01:18:31	2019-04-14 01:30:00	2019-04-14 10:00:00	187	189	173	25200
613	2019-04-14 21:00:00	2019-04-14 21:30:00	2019-04-15 04:00:00	0.1	0.4	24	2019-04-14 21:15:00	2019-04-14 21:15:00	2019-04-15 06:00:00	167	165	157.5	11873.6
614	2019-04-15 13:06:39	2019-04-15 17:30:00	2019-04-15 22:00:00	1.49974	7.2	24.4	2019-04-15 18:00:00	2019-04-15 20:45:00	2019-04-16 05:00:00	151	156	146.5	113369
615	2019-04-19 23:20:00	2019-04-20 04:29:57	2019-04-20 05:00:00	2.99876	11.2	10.3	2019-04-20	2019-04-20 22:45:00	2019-04-21 17:00:00	263.25	283	226.75	2.07603e+06
616	2019-04-23 02:30:00	2019-04-23 03:00:00	2019-04-23 04:00:00	0.15	0.3	11.5	2019-04-23 03:00:00	2019-04-24 02:45:00	2019-04-24 17:00:00	229.25	324	272.5	3.27342e+06
617	2019-05-20 14:07:30	2019-05-20 15:30:00	2019-05-21 01:00:00	1.49991	2.8	24.8	2019-05-20 14:22:30	2019-05-20 14:30:00	2019-05-21 04:00:00	145	147	135.5	30575
618	2019-05-21 14:00:00	2019-05-21 20:29:55	2019-05-21 21:00:00	4.39447	5.3	27.6	2019-05-21 16:00:00	2019-05-22 20:45:00	2019-05-26 14:00:00	128.5	133	130.5	3.31498e+06
619	2019-05-22 14:00:00	2019-05-22 17:29:57	2019-05-22 19:00:00	0.799931	2.4	32.9	2019-05-22 15:00:00	2019-05-23 05:45:00	2019-05-23 16:00:00	122.5	146	133.75	738326
620	2019-05-25 15:04:17	2019-05-25 20:30:04	2019-05-27 16:00:00	2.39989	12.6	20.5	2019-05-25 19:00:00	2019-05-28 05:15:00	2019-05-28 07:00:00	134	149	143	239625
621	2019-06-12 12:08:34	2019-06-12 12:38:34	2019-06-13 01:00:00	0.609519	1.6	5.4	2019-06-12 16:00:00	2019-06-14 00:15:00	2019-06-14 17:00:00	93.4	120	94.1	2.04373e+06
622	2019-06-26 09:15:00	2019-06-26 13:30:02	2019-06-27 03:00:00	8.09411	14.3	0	2019-06-26 12:00:00	2019-06-27 00:45:00	2019-06-27 11:00:00	64.9	85.3	73.35	549248
623	2019-10-20 09:05:27	2019-10-20 09:35:27	2019-10-20 12:00:00	1.01817	1.4	86	2019-10-20 19:00:00	2019-10-21 08:00:00	2019-10-24 18:00:00	51	55.6	50.45	4.35154e+06
624	2019-10-21 01:00:00	2019-10-21 01:30:00	2019-10-21 03:00:00	0.1	0.3	87.4	2019-10-21 01:00:00	2019-10-22 03:00:00	2019-10-24 18:00:00	49.6	59.2	50.45	4.5666e+06
625	2019-10-21 21:20:00	2019-10-22 05:30:01	2019-10-22 07:00:00	1.49976	3.3	87.7	2019-10-21 22:00:00	2019-10-22 17:00:00	2019-10-23 17:00:00	54.725	102	61.35	2.5584e+06
626	2019-11-24 05:20:00	2019-11-25 17:29:58	2019-11-25 18:00:00	2.69929	13.2	13.4	2019-11-24 09:00:00	2019-11-24 09:30:00	2019-11-25 23:00:00	29.625	30.3	29	9335.87
627	2019-11-26 05:00:00	2019-11-26 15:29:59	2019-11-27 06:00:00	0.699992	5.9	13.2	2019-11-26 05:00:00	2019-11-27 09:45:00	2019-11-27 17:00:00	28.2	35.6	29	246710
628	2019-12-10 15:10:00	2019-12-12 02:29:58	2019-12-13 16:00:00	3.39872	51.1	11.4	2019-12-10 18:00:00	2019-12-12 16:30:00	2019-12-13 19:00:00	29.85	66.8	47.15	1.63912e+06
629	2019-12-18 21:30:00	2019-12-19 16:30:00	2019-12-19 20:00:00	7.29904	39.3	0	2019-12-18 23:00:00	2019-12-20 17:15:00	2019-12-22 09:00:00	35.825	107	83.9	5.49732e+06
630	2019-12-31 06:10:00	2019-12-31 21:30:22	2020-01-02 11:00:00	3.2	43.3	0.6	2019-12-31 07:00:00	2020-01-01 18:30:00	2020-01-02 12:00:00	33.575	76.3	64.525	1.32943e+06
631	2020-01-20 08:00:00	2020-01-20 13:00:02	2020-01-20 14:00:00	0.149935	0.4	26.7	2020-01-20 10:00:00	2020-01-20 11:15:00	2020-01-20 15:00:00	35.375	36.5	35.6	2237.63
632	2020-01-26 20:15:00	2020-01-26 23:29:55	2020-01-27	3.29904	8.8	59.1	2020-01-26 21:00:00	2020-01-27 01:00:00	2020-01-27 04:00:00	87.6	89.5	86.025	22989.4
633	2020-01-27 11:06:39	2020-01-28 12:30:01	2020-01-28 15:00:00	4.79903	39.7	41.2	2020-01-27 14:00:00	2020-01-28 13:30:00	2020-01-29	84.925	104	97.3	503287
634	2020-01-29 04:06:39	2020-01-29 18:29:54	2020-01-29 19:00:00	1.39972	7.9	80.9	2020-01-29 12:00:00	2020-01-29 22:45:00	2020-01-30 01:00:00	92.2	98.9	95.7	23252.9
635	2020-01-30 15:30:00	2020-01-30 20:29:56	2020-01-31 04:00:00	0.499898	1.7	68.9	2020-01-31	2020-02-01 03:45:00	2020-02-04 08:00:00	89.125	129	107	1.36062e+07
636	2020-02-01 07:06:39	2020-02-01 17:30:02	2020-02-02 17:00:00	3.99857	13	58.1	2020-02-01 08:00:00	2020-02-01 20:45:00	2020-02-02 18:00:00	131.25	187	154	2.81685e+06
637	2020-02-04 15:03:00	2020-02-05 08:30:01	2020-02-08 14:00:00	5.39877	59.5	14.7	2020-02-04 21:00:00	2020-02-07 07:15:00	2020-02-08 23:00:00	101.725	156	126	4.8412e+06
638	2020-04-24 01:06:00	2020-04-25 12:29:58	2020-04-25 15:00:00	3.09904	18.2	34.1	2020-04-24 19:00:00	2020-04-26 02:00:00	2020-04-26 21:00:00	161.5	236	168	3.65682e+06
639	2020-04-29 04:30:00	2020-04-29 23:30:00	2020-04-30 15:00:00	4.99888	9.2	32.3	2020-04-29 19:00:00	2020-04-30 12:30:00	2020-05-01 17:00:00	174	231	153.5	5.0379e+06
640	2020-05-11 14:02:36	2020-05-11 14:32:36	2020-05-11 19:00:00	2.24333	6.3	0.2	2020-05-11 18:00:00	2020-05-12 03:15:00	2020-05-12 14:00:00	114	127	118.25	358014
641	2020-06-06 01:12:00	2020-06-07 16:29:56	2020-06-08 04:00:00	8.29327	34.7	1.4	2020-06-06 01:27:00	2020-06-06 01:45:00	2020-06-08 06:00:00	80.4	80.4	66.075	78731.7
642	2020-06-09 01:00:00	2020-06-09 01:30:00	2020-06-09 18:00:00	4	16.1	35.1	2020-06-09 02:00:00	2020-06-10 03:45:00	2020-06-10 17:00:00	62.825	117	97.4	1.27306e+06
643	2020-06-11 20:01:37	2020-06-13 23:30:01	2020-06-14 10:00:00	6.7976	41.5	50.8	2020-06-11 21:00:00	2020-06-12	2020-06-14 18:00:00	96.9	105	81.65	439271
644	2020-06-14 22:30:00	2020-06-15 05:29:58	2020-06-16 19:00:00	6.79987	38.9	57.6	2020-06-15	2020-06-16 01:00:00	2020-06-16 21:00:00	82.4	150	104.5	3628783
645	2020-10-10 04:00:42	2020-10-10 05:30:01	2020-10-15	11.4991	112.2	8.1	2020-10-10 05:00:00	2020-10-13 17:15:00	2020-10-15 03:00:00	22.1	432	61.8875	2.30817e+07
646	2020-11-03 13:15:00	2020-11-05 16:29:58	2020-11-07 02:00:00	3.99963	51.3	2.9	2020-11-03 15:00:00	2020-11-06 05:00:00	2020-11-07 06:00:00	25.8	123	44.225	3.38773e+06
647	2020-11-07 12:00:00	2020-11-07 15:30:03	2020-11-08 04:00:00	0.999602	5.3	51.3	2020-11-07 12:15:00	2020-11-07 12:30:00	2020-11-08 11:00:00	41.4	42.4	36.5	25470
648	2020-11-09 11:30:00	2020-11-10 14:30:04	2020-11-11 15:00:00	2.19975	26.4	56.6	2020-11-09 12:00:00	2020-11-10 15:15:00	2020-11-11 16:00:00	33.35	35.6	32.9	113982
649	2020-11-17 08:20:00	2020-11-19 05:29:56	2020-11-19 15:00:00	7.49653	62.1	164.5	2020-11-17 10:00:00	2020-11-17 23:00:00	2020-11-19 22:00:00	83.475	127	80.875	3.67579e+06
650	2020-12-16 11:30:00	2020-12-16 13:30:04	2020-12-17 17:00:00	3.19985	27.4	26.2	2020-12-16 13:00:00	2020-12-17 01:30:00	2020-12-17 19:00:00	43.3	67.2	56	755431
651	2020-12-18 19:00:00	2020-12-19 22:29:56	2020-12-21 04:00:00	6.49762	90.6	45.8	2020-12-18 19:00:00	2020-12-20 18:15:00	2020-12-21 19:00:00	52.125	858	537	3.81696e+07
652	2021-01-09 12:00:00	2021-01-09 12:30:00	2021-01-09 14:00:00	0.1	0.3	46.6	2021-01-09 12:15:00	2021-01-09 12:15:00	2021-01-10 11:00:00	71	70.95	65.5	8485.96
653	2021-01-11 18:00:00	2021-01-12 06:30:02	2021-01-13 08:00:00	5.59914	80.4	22.7	2021-01-11 19:00:00	2021-01-13 04:45:00	2021-01-15 09:00:00	61.375	1690	211.25	1.09721e+08
654	2021-02-22 05:00:00	2021-02-22 16:29:55	2021-02-23 04:00:00	3.49675	16.1	48.6	2021-02-22 06:00:00	2021-02-22 22:00:00	2021-02-23 13:00:00	51.825	82	66.8	848592
655	2021-05-09 08:00:00	2021-05-09 08:30:00	2021-05-09 14:00:00	0.1	0.7	2.7	2021-05-09 12:00:00	2021-05-09 21:00:00	2021-05-10 09:00:00	82.625	93.3	84.575	262765
656	2021-05-14 04:20:00	2021-05-14 15:29:58	2021-05-14 16:00:00	0.699963	3.3	0.7	2021-05-14 10:00:00	2021-05-14 19:00:00	2021-05-15 14:00:00	113.5	130	98.55	946105
657	2021-05-22 12:00:00	2021-05-22 18:30:01	2021-05-23 04:00:00	1.59981	8.6	4	2021-05-22 13:00:00	2021-05-24 00:45:00	2021-05-24 05:00:00	66.35	86.9	80.975	318056
658	2021-06-08 10:00:00	2021-06-08 11:19:53	2021-06-08 14:00:00	0.3	1	2.4	2021-06-08 10:00:00	2021-06-09 01:15:00	2021-06-09 03:00:00	60.1	62.9	60.4	18042.4
659	2021-06-10 04:30:00	2021-06-10 05:29:57	2021-06-10 06:00:00	1.79943	2.1	3.4	2021-06-10 07:00:00	2021-06-11	2021-06-11 02:00:00	60.125	68.1	65.175	31151.3
660	2021-06-11 07:20:00	2021-06-11 17:30:03	2021-06-12 07:00:00	1.89951	13.1	5.5	2021-06-11 15:00:00	2021-06-12 23:00:00	2021-06-13 06:00:00	58.3	82	72.8	397900
661	2021-06-12 21:20:00	2021-06-14 08:29:57	2021-06-16 01:00:00	2.19984	13.4	16.2	2021-06-12 22:00:00	2021-06-14	2021-06-16 05:00:00	80.15	83.5	65.5	783861
662	2021-09-17 10:02:00	2021-09-17 12:28:43	2021-09-17 13:00:00	3	9	0	2021-09-17 14:00:00	2021-09-18 12:30:00	2021-09-24 20:00:00	24.3	35.6	25.8	8.01787e+06
663	2021-09-18 03:00:42	2021-09-18 03:30:42	2021-09-20 02:00:00	8.46667	50.3	9	2021-09-18 04:00:00	2021-09-19	2021-09-20 20:00:00	24.875	84.9	39.15	4.49202e+06
