# Supplementary material for: Leveraging a time-series event separation method to disentangle time-varying hydrologic controls on streamflow – application to wildfire-affected catchments
Source: Copernicus journal article supplement (doi:10.5194/hess-29-27-2025), 2025-01-03
Supplement: Supplementary file 8 [file ThompsonRiver_EventAttributes.xlsx]

## Sheet: Events_Sorting - Copy
	storm_start	storm_peak	storm_end	storm_peak_60int_mm/hr	storm_depth_mm	antPrecip_mm	flow_start	flow_peak	flow_end	flow_start_mag_cfs	flow_peak_mag_cfs	flow_end_mag_cfs	volume_ft3
1	1997-10-02 04:12:00	1997-10-02 04:42:00	1997-10-02 17:00:00	0.44	2	0	1997-10-02 22:00:00	1997-10-02 22:15:00	1997-10-03 01:00:00	245	248	244	9150
2	1997-10-03 09:30:00	1997-10-03 11:01:49	1997-10-04 10:00:00	0.8	5.9	2	1997-10-03 10:00:00	1997-10-04 14:45:00	1997-10-07 19:00:00	248	270	251	4.74638e+06
3	1997-10-04 17:30:00	1997-10-05 03:29:56	1997-10-05 17:00:00	0.799895	5.3	7.9	1997-10-05	1997-10-05 13:45:00	1997-10-06 02:00:00	267	274	266	347288
4	1997-10-27 01:00:00	1997-10-27 01:30:00	1997-10-27 21:00:00	0.3	2.3	8.8	1997-10-27 05:00:00	1997-10-27 05:45:00	1997-10-27 22:00:00	230.75	233	230	74160.7
5	1997-10-28 12:15:00	1997-10-29 13:29:57	1997-11-01 13:00:00	3.19953	31.2	11.1	1997-10-29 02:00:00	1997-10-31 08:15:00	1997-11-05 08:00:00	230.75	402	271	3.44888e+07
6	1997-11-22 05:20:00	1997-11-22 05:50:00	1997-11-22 07:00:00	0.266667	0.5	13.2	1997-11-22 05:35:00	1997-11-22 05:45:00	1997-11-22 16:00:00	237	237	233	61726.8
7	1997-11-23 21:00:00	1997-11-23 22:30:01	1997-11-24 17:00:00	0.599934	2.7	11.4	1997-11-24 02:00:00	1997-11-24 12:30:00	1997-11-24 20:00:00	236	251	244	284400
8	1997-12-14 18:00:00	1997-12-16 18:30:02	1997-12-17 02:00:00	0.599919	8.3	0	1997-12-15 06:00:00	1997-12-17 04:15:00	1997-12-17 19:00:00	192	230	219	693520
9	1997-12-26 21:30:00	1997-12-26 23:29:58	1997-12-27 03:00:00	0.599966	2.1	0	1997-12-27	1997-12-27 03:15:00	1997-12-27 05:00:00	183	189	186.75	20081.3
10	1997-12-28 01:00:00	1997-12-28 01:30:00	1997-12-28 05:00:00	0.1	0.5	2.1	1997-12-28 05:00:00	1997-12-29 00:30:00	1997-12-31 16:00:00	173	189	176	4.6355e+06
11	1998-01-01 13:00:00	1998-01-02 06:35:32	1998-01-02 11:00:00	0.8	8.2	2.6	1998-01-01 15:00:00	1998-01-02 07:30:00	1998-01-02 19:00:00	186.75	223	212	897720
12	1998-01-12 21:00:00	1998-01-13 01:29:58	1998-01-13 17:00:00	0.599965	6.5	5.5	1998-01-13 01:00:00	1998-01-14 14:00:00	1998-01-16 09:00:00	127.75	196	178.25	7.7692e+06
13	1998-01-14 15:00:00	1998-01-14 16:30:01	1998-01-14 20:00:00	0.399934	1.3	8	1998-01-14 17:00:00	1998-01-15 12:30:00	1998-01-15 14:00:00	196.75	230	195	410362
14	1998-01-26 05:30:00	1998-01-26 06:00:00	1998-01-26 16:00:00	0.2	1.4	3.1	1998-01-26 07:00:00	1998-01-27 13:45:00	1998-01-28 16:00:00	167	189	183	1.35118e+06
15	1998-01-27 01:30:00	1998-01-27 04:25:29	1998-01-27 17:00:00	0.4	2.4	4.5	1998-01-27 05:00:00	1998-01-27 18:45:00	1998-01-28 09:00:00	173	196	189	784929
16	1998-03-21 18:00:00	1998-03-22 16:30:02	1998-03-23 20:00:00	0.699884	8.1	6.6	1998-03-21 18:00:00	1998-03-24 15:45:00	1998-03-30 15:00:00	226	425	370	7.50704e+07
17	1998-04-04 13:00:00	1998-04-05 04:24:47	1998-04-07 05:00:00	0.4	9.1	2.9	1998-04-04 13:00:00	1998-04-07 09:00:00	1998-04-09 07:00:00	418	542	510	20078250
18	1998-04-22 21:00:00	1998-04-23 03:30:01	1998-04-23 05:00:00	0.2	0.9	0	1998-04-22 21:00:00	1998-04-24 05:00:00	1998-04-27 20:00:00	489	856	745	1.07645e+08
19	1998-04-23 13:00:00	1998-04-23 21:29:57	1998-04-24 04:00:00	1.19972	3.2	0.9	1998-04-23 13:00:00	1998-04-24 17:30:00	1998-04-27 04:00:00	608	1180	793	7.71337e+07
20	1998-05-24 06:00:00	1998-05-26 14:29:54	1998-05-28 01:00:00	3.59853	53.9	40.5	1998-05-24 06:00:00	1998-05-28 05:00:00	1998-05-29 15:00:00	873.25	2270	1867.5	7.39523e+07
21	1998-06-10 01:00:00	1998-06-10 04:29:57	1998-06-10 16:00:00	0.599932	2.9	7.3	1998-06-10 01:15:00	1998-06-10 01:15:00	1998-06-10 17:00:00	692	692	681	85757.1
22	1998-06-11 00:12:00	1998-06-12 12:29:59	1998-06-13 20:00:00	1.69996	22.3	9.8	1998-06-11 07:00:00	1998-06-14 07:15:00	1998-06-14 23:00:00	668.5	806	727	4.77044e+06
23	1998-06-14 12:00:00	1998-06-14 15:30:03	1998-06-16 19:00:00	1.3998	13.9	25.4	1998-06-15 03:00:00	1998-06-16 18:30:00	1998-06-17 16:00:00	727	812	787	4.74887e+06
24	1998-07-28 03:12:00	1998-07-28 03:47:54	1998-07-28 12:00:00	0.5	1.2	2.9	1998-07-28 08:00:00	1998-07-28 13:30:00	1998-07-29 05:00:00	299	310	298	410957
25	1998-07-29 06:00:00	1998-07-30 01:57:43	1998-07-30 05:00:00	0.1	2.4	3.4	1998-07-29 07:00:00	1998-07-29 07:15:00	1998-07-30 06:00:00	300	302	294	144724
26	1998-07-30 16:00:00	1998-07-30 22:41:56	1998-07-31 04:00:00	0.404991	0.8	3.6	1998-07-31 02:00:00	1998-08-01 04:00:00	1998-08-03 16:00:00	290	352	302	8.94427e+06
27	1998-07-31 12:00:00	1998-07-31 22:29:59	1998-08-01 23:00:00	1.59996	12	4.4	1998-07-31 12:00:00	1998-08-01 05:30:00	1998-08-02 17:00:00	309	374	322	4.15583e+06
28	1998-10-01 19:30:00	1998-10-02 04:30:01	1998-10-03 04:00:00	3.69918	11.4	2.2	1998-10-02 06:00:00	1998-10-02 08:00:00	1998-10-04 18:00:00	170.75	183	173	1.41516e+06
29	1998-11-10 03:00:00	1998-11-10 07:50:25	1998-11-10 15:00:00	0.2	2.1	8	1998-11-10 03:15:00	1998-11-10 13:00:00	1998-11-10 18:00:00	141	144	138	84157.6
30	1998-11-10 23:00:00	1998-11-10 23:30:00	1998-11-11 05:00:00	0.1	0.7	9.6	1998-11-10 23:00:00	1998-11-11	1998-11-11 06:00:00	141	144	141	51300
31	1998-11-11 23:00:00	1998-11-13 04:29:58	1998-11-14 19:00:00	2.99933	22.3	6.1	1998-11-11 23:00:00	1998-11-14 01:15:00	1998-11-15 07:00:00	144	189	176	2273490
32	1998-11-15 04:00:00	1998-11-15 17:29:57	1998-11-16 17:00:00	0.799712	8.9	25.1	1998-11-15 11:00:00	1998-11-16 11:30:00	1998-11-16 18:00:00	176	199	189	468225
33	1998-11-18 01:00:00	1998-11-18 12:30:01	1998-11-18 18:00:00	0.399971	3.3	9.9	1998-11-18 01:15:00	1998-11-18 01:15:00	1998-11-18 19:00:00	173	173	164	4107.04
34	1998-11-29 11:00:00	1998-11-29 13:29:56	1998-11-30 03:00:00	1.09965	7.4	0	1998-11-29 23:00:00	1998-11-30 22:00:00	1998-12-08 23:00:00	187.5	196	192	2.87496e+07
35	1998-11-30 12:00:00	1998-12-02 00:29:54	1998-12-03 18:00:00	1.6992	32.7	7.4	1998-11-30 17:00:00	1998-12-03 02:00:00	1998-12-04 01:00:00	186	322	270	7.5061e+06
36	1998-12-10 20:00:00	1998-12-10 20:30:00	1998-12-11 02:00:00	0.1	0.4	0.5	1998-12-10 23:00:00	1998-12-11 04:15:00	1998-12-12 14:00:00	173	183	179	832604
37	1998-12-11 16:00:00	1998-12-11 16:30:00	1998-12-11 23:00:00	0.1	0.8	0.9	1998-12-11 16:15:00	1998-12-11 16:15:00	1998-12-12 14:00:00	183	183	179	136428
38	1998-12-12 09:00:00	1998-12-12 16:10:05	1998-12-12 22:00:00	0.4	2	1.7	1998-12-12 19:00:00	1998-12-13 21:45:00	1998-12-19 13:00:00	180	186	93.25	2.89694e+07
39	1998-12-13 13:00:00	1998-12-13 16:29:57	1998-12-13 19:00:00	0.199932	0.8	3.7	1998-12-13 14:00:00	1998-12-14 16:45:00	1998-12-16 18:00:00	180	199	192	2.6004e+06
40	1998-12-14 05:30:00	1998-12-14 06:00:00	1998-12-14 23:00:00	0.15	1.3	4	1998-12-14 06:00:00	1998-12-15 02:45:00	1998-12-15 15:00:00	192	205	199	510852
41	1999-01-12 13:00:00	1999-01-12 13:30:00	1999-01-12 17:00:00	0.1	0.5	6.7	1999-01-12 13:00:00	1999-01-12 19:45:00	1999-01-13 01:00:00	215	223	216	104438
42	1999-01-14 06:00:00	1999-01-16 03:29:59	1999-01-16 08:00:00	1.19989	13.8	6.5	1999-01-14 10:00:00	1999-01-15 20:45:00	1999-01-17 14:00:00	208	310	282	1.0609e+07
43	1999-01-22 21:00:00	1999-01-23 05:43:59	1999-01-23 17:00:00	1.5	9.3	16.9	1999-01-23 01:00:00	1999-01-23 07:30:00	1999-01-23 21:00:00	253	263	248	387056
44	1999-02-04 03:00:00	1999-02-04 11:58:48	1999-02-05 07:00:00	0.2	2.5	3.8	1999-02-04 05:00:00	1999-02-05 00:30:00	1999-02-05 08:00:00	199.75	205	199	160462
45	1999-02-05 21:00:00	1999-02-07 05:30:01	1999-02-08 05:00:00	2.89995	17.4	6.3	1999-02-06 04:00:00	1999-02-07 08:15:00	1999-02-08 06:00:00	196.75	223	212	1.11339e+06
46	1999-02-27 08:00:00	1999-02-28 06:30:02	1999-03-01 05:00:00	0.999825	12.9	23.2	1999-02-27 14:00:00	1999-03-01 21:45:00	1999-03-04 17:00:00	217.5	302	278	1.42329e+07
47	1999-04-19 19:00:00	1999-04-19 19:30:00	1999-04-19 21:00:00	0.1	0.3	0	1999-04-19 19:00:00	1999-04-20 20:45:00	1999-04-22 07:00:00	998.25	1160	1100	1.59742e+07
48	1999-05-14 06:00:00	1999-05-14 16:10:45	1999-05-14 17:00:00	0.1	1.1	3.9	1999-05-14 06:15:00	1999-05-14 07:00:00	1999-05-14 18:00:00	710	716	710	43200
49	1999-06-24 16:00:00	1999-06-24 16:30:00	1999-06-24 18:00:00	0.1	0.3	3.3	1999-06-24 19:00:00	1999-06-25 13:00:00	1999-06-26	907	966	946	1.49e+06
50	1999-10-08 06:00:00	1999-10-09 12:30:05	1999-10-09 20:00:00	1.5	16.5	0	1999-10-08 07:00:00	1999-10-09 02:00:00	1999-10-11 16:00:00	160.25	230	176	7.13036e+06
51	1999-10-27 20:00:00	1999-10-28 05:29:58	1999-10-29 19:00:00	2.49926	18.3	4.8	1999-10-28 01:00:00	1999-10-28 16:30:00	1999-10-30 21:00:00	162.5	199	167	5.19684e+06
52	1999-11-12 20:00:00	1999-11-13 05:30:04	1999-11-13 19:00:00	4.29934	18	0.5	1999-11-12 21:00:00	1999-11-14	1999-11-15 12:00:00	163.25	290	251	1.25864e+07
53	1999-11-24 14:00:00	1999-11-26 05:30:04	1999-11-27 05:00:00	5.09983	35.3	3.1	1999-11-24 18:00:00	1999-11-26 20:45:00	1999-11-28 04:00:00	186.75	459	310	1.97357e+07
54	1999-12-17 20:00:00	1999-12-18 05:29:58	1999-12-18 18:00:00	2.89901	10.8	0	1999-12-17 22:00:00	1999-12-18 14:30:00	1999-12-19 16:00:00	255	298	282	2.95828e+06
55	2000-01-30 05:20:00	2000-01-30 22:28:05	2000-01-31 05:00:00	0.3	7.2	2.9	2000-01-30 17:00:00	2000-01-31 23:45:00	2000-02-01 09:00:00	142.5	179	155	1.00967e+06
56	2000-02-06 03:00:00	2000-02-06 03:30:00	2000-02-06 06:00:00	0.1	0.4	16.8	2000-02-06 09:00:00	2000-02-06 09:45:00	2000-02-06 12:00:00	213	216	212	9075
57	2000-02-07 06:00:00	2000-02-08 04:29:56	2000-02-09 01:00:00	0.599891	5.8	1.6	2000-02-07 06:15:00	2000-02-07 06:15:00	2000-02-09 02:00:00	205	205	199	4073.14
58	2000-02-11 11:00:00	2000-02-11 11:30:00	2000-02-11 18:00:00	0.1	0.8	6.4	2000-02-11 12:00:00	2000-02-12 17:45:00	2000-02-13 09:00:00	155.75	223	205	2.88714e+06
59	2000-02-26 06:00:00	2000-02-26 12:30:01	2000-02-26 15:00:00	0.1	0.5	2.4	2000-02-26 06:15:00	2000-02-26 10:00:00	2000-02-26 16:00:00	202	205	202	13500
60	2000-03-06 07:00:00	2000-03-06 07:30:00	2000-03-06 09:00:00	0.1	0.3	1	2000-03-06 07:00:00	2000-03-06 23:15:00	2000-03-08 15:00:00	283	306	298	2.21757e+06
61	2000-04-13 06:00:00	2000-04-14 05:30:03	2000-04-15 17:00:00	1	21.5	0	2000-04-13 06:00:00	2000-04-14 12:30:00	2000-04-15 20:00:00	978.25	1580	1330	4.61105e+07
62	2000-04-17 14:00:00	2000-04-17 15:30:01	2000-04-17 18:00:00	0.199967	0.6	21.8	2000-04-18 01:00:00	2000-04-18 13:45:00	2000-04-25 23:00:00	1245	1300	1270	1.8893e+08
63	2000-04-25 04:00:00	2000-04-25 04:30:00	2000-04-25 08:00:00	0.1	0.3	2.2	2000-04-25 04:15:00	2000-04-25 04:15:00	2000-04-25 12:00:00	1400	1400	1340	67935.5
64	2000-05-02 05:10:00	2000-05-02 05:40:00	2000-05-02 16:00:00	0.583333	1.7	3.7	2000-05-02 06:00:00	2000-05-03 11:00:00	2000-05-05 16:00:00	1212.5	1360	1322.5	2.54642e+07
65	2000-05-03 09:00:00	2000-05-03 16:47:16	2000-05-03 20:00:00	0.3	1.8	5.3	2000-05-03 11:00:00	2000-05-04 13:00:00	2000-05-04 23:00:00	1355	1420	1390	2.14306e+06
66	2000-05-19 05:30:00	2000-05-19 08:25:29	2000-05-19 15:00:00	0.4	2.2	0.6	2000-05-19 06:00:00	2000-05-19 18:15:00	2000-05-26 18:00:00	1060	1100	1080	5.6972e+07
67	2000-05-20 05:30:00	2000-05-20 06:00:00	2000-05-20 13:00:00	0.2	0.7	2.8	2000-05-21 03:00:00	2000-05-21 08:15:00	2000-05-26 11:00:00	1102.5	1120	1100	3.81811e+07
68	2000-05-28 11:10:00	2000-05-28 19:29:56	2000-05-29 08:00:00	2.39922	10.2	7.3	2000-05-28 11:25:00	2000-05-28 11:45:00	2000-05-29 10:00:00	1110	1120	1050	368400
69	2000-05-30 20:12:00	2000-05-31 05:30:03	2000-05-31 18:00:00	3.29946	14.4	17.5	2000-05-30 21:00:00	2000-05-31 16:45:00	2000-06-02	946	1150	993	1.93248e+07
70	2000-06-13 06:00:00	2000-06-13 06:30:00	2000-06-13 14:00:00	0.1	0.7	5.1	2000-06-13 06:15:00	2000-06-13 06:45:00	2000-06-13 16:00:00	812	818	812	124200
71	2000-11-01 05:12:00	2000-11-01 05:42:00	2000-11-01 15:00:00	0.46	1.9	1.1	2000-11-01 05:27:00	2000-11-01 06:45:00	2000-11-01 16:00:00	147	149	147	16200
72	2000-11-04 11:12:00	2000-11-04 12:30:05	2000-11-05 15:00:00	1.39919	9.9	1.9	2000-11-04 12:00:00	2000-11-04 22:15:00	2000-11-05 16:00:00	147	159	154	433575
73	2000-11-27 03:00:00	2000-11-27 06:29:57	2000-11-27 10:00:00	0.399932	1.6	0.1	2000-11-27 03:00:00	2000-11-27 09:45:00	2000-11-27 14:00:00	136.5	142	140	56976.1
74	2000-11-29 11:00:00	2000-11-29 16:30:05	2000-12-01 04:00:00	0.5	6.4	1.7	2000-11-29 12:00:00	2000-11-30 21:45:00	2000-12-01 06:00:00	119	149	140	716512
75	2000-12-10 03:00:00	2000-12-10 03:30:00	2000-12-10 05:00:00	0.1	0.3	1.9	2000-12-10 03:15:00	2000-12-10 03:15:00	2000-12-10 09:00:00	132	132	129	22304.3
76	2000-12-11 07:00:00	2000-12-11 09:28:50	2000-12-11 12:00:00	0.2	0.9	2.4	2000-12-11 07:15:00	2000-12-11 07:15:00	2000-12-11 14:00:00	121	121	119	20000
77	2000-12-13 17:00:00	2000-12-14 00:54:29	2000-12-14 03:00:00	0.1	0.7	2.8	2000-12-13 20:00:00	2000-12-14 21:30:00	2000-12-15 01:00:00	126.5	134	132	36283.2
78	2000-12-31 16:00:00	2000-12-31 18:28:50	2000-12-31 22:00:00	0.2	1.1	0	2000-12-31 16:15:00	2000-12-31 21:45:00	2001-01-02 06:00:00	127	127	125	131436
79	2001-01-03 23:00:00	2001-01-05 01:28:18	2001-01-05 05:00:00	0.3	2.3	1.1	2001-01-03 23:00:00	2001-01-05 18:15:00	2001-01-06 16:00:00	130.5	134	132	180770
80	2001-01-18 21:00:00	2001-01-18 21:30:00	2001-01-18 23:00:00	0.1	0.3	4.4	2001-01-18 21:00:00	2001-01-18 21:30:00	2001-01-19 02:00:00	130.5	132	127	25425
81	2001-01-19 12:00:00	2001-01-19 15:58:49	2001-01-19 19:00:00	0.2	1	4.7	2001-01-19 12:15:00	2001-01-19 13:00:00	2001-01-20 04:00:00	125	127	125	104400
82	2001-01-21 17:00:00	2001-01-21 17:30:00	2001-01-21 21:00:00	0.1	0.5	1.3	2001-01-21 21:00:00	2001-01-22 01:45:00	2001-01-22 09:00:00	104.25	138	129	570305
83	2001-02-06 12:00:00	2001-02-06 12:30:00	2001-02-06 17:00:00	0.1	0.6	12.1	2001-02-06 12:15:00	2001-02-06 12:15:00	2001-02-11 08:00:00	125	125	123	58579.7
84	2001-02-18 06:00:00	2001-02-18 07:43:26	2001-02-18 17:00:00	0.3	2	7.7	2001-02-18 19:00:00	2001-02-18 22:15:00	2001-02-19 02:00:00	119	121	119	21600
85	2001-02-21 07:00:00	2001-02-22 09:24:42	2001-02-23 05:00:00	0.3	5.7	2	2001-02-21 11:00:00	2001-02-21 20:30:00	2001-02-23 15:00:00	113	129	123	949647
86	2001-03-16 15:00:00	2001-03-16 15:30:00	2001-03-16 17:00:00	0.1	0.3	3.9	2001-03-16 15:15:00	2001-03-16 15:15:00	2001-03-16 22:00:00	138	138	136	21666.7
87	2001-03-17 03:00:00	2001-03-17 03:30:00	2001-03-17 05:00:00	0.1	0.3	4.2	2001-03-17 03:15:00	2001-03-17 03:15:00	2001-03-17 14:00:00	136	136	134	34325.6
88	2001-03-18 14:00:00	2001-03-19 07:50:58	2001-03-19 18:00:00	1	10	4.5	2001-03-18 17:00:00	2001-03-19 22:15:00	2001-03-20 15:00:00	133.5	210	188	2.95868e+06
89	2001-03-20 04:00:00	2001-03-20 04:30:00	2001-03-20 16:00:00	0.1	0.5	10.6	2001-03-20 04:15:00	2001-03-20 04:15:00	2001-03-21	207	207	199	42869.6
90	2001-03-25 07:00:00	2001-03-25 13:23:42	2001-03-25 17:00:00	0.5	1.9	0.5	2001-03-25 07:00:00	2001-03-26 01:45:00	2001-03-27 21:00:00	199	213	208.5	1.67721e+06
91	2001-03-26 04:00:00	2001-03-26 05:30:07	2001-03-26 18:00:00	0.2	1.5	1.9	2001-03-26 15:00:00	2001-03-26 22:15:00	2001-03-27 05:00:00	210.75	221	215	190535
92	2001-04-27 12:15:00	2001-04-27 13:29:59	2001-04-29	0.999898	5.1	0	2001-04-27 13:00:00	2001-04-28 18:15:00	2001-04-30 14:00:00	627	935	730	3.48009e+07
93	2001-06-03 04:20:00	2001-06-03 14:30:03	2001-06-04 17:00:00	1.89922	25.7	1.2	2001-06-03 08:00:00	2001-06-04 01:15:00	2001-06-04 18:00:00	499	560	515	3.00865e+06
94	2002-01-08 22:00:00	2002-01-08 22:30:00	2002-01-09	0.1	0.3	11.9	2002-01-08 22:00:00	2002-01-08 22:15:00	2002-01-09 03:00:00	241.25	242	239	24570
95	2002-01-22 18:00:00	2002-01-22 23:29:59	2002-01-23 03:00:00	0.399998	2.6	17	2002-01-22 18:00:00	2002-01-22 22:00:00	2002-01-23 04:00:00	124.5	142	136	210004
96	2002-01-23 14:00:00	2002-01-25 11:30:05	2002-01-26 17:00:00	1.5	28.4	17.9	2002-01-23 17:00:00	2002-01-26 01:00:00	2002-01-26 18:00:00	127	166	152	1.66134e+06
97	2002-02-19 08:00:00	2002-02-19 17:30:04	2002-02-20	0.999867	6.4	0	2002-02-19 18:00:00	2002-02-19 21:15:00	2002-02-20 04:00:00	127	129	127	45000
98	2002-02-21 10:00:00	2002-02-23 10:29:56	2002-02-24 10:00:00	1.39983	20.5	6.4	2002-02-21 14:00:00	2002-02-23 02:30:00	2002-02-24 17:00:00	122.5	490	342	2.97815e+07
99	2002-03-05 06:00:00	2002-03-05 20:29:58	2002-03-07 04:00:00	0.599883	9.5	3.8	2002-03-05 06:00:00	2002-03-05 06:30:00	2002-03-07 08:00:00	197.5	199	146.5	1.69362e+06
100	2002-03-08 08:00:00	2002-03-08 08:30:00	2002-03-08 20:00:00	0.1	0.7	9.5	2002-03-08 13:00:00	2002-03-09 20:00:00	2002-03-10 06:00:00	152	181	173	1.49631e+06
101	2002-03-09 16:00:00	2002-03-11 19:29:54	2002-03-12 04:00:00	1.49899	21.6	10.2	2002-03-09 17:00:00	2002-03-12 11:00:00	2002-03-14 08:00:00	168	284	251	8.4972e+06
102	2002-04-12 02:00:00	2002-04-12 09:56:05	2002-04-12 18:00:00	0.1	1.2	3.1	2002-04-12 02:00:00	2002-04-13 18:00:00	2002-04-19 22:00:00	820	1240	1090	4.57154e+08
103	2002-04-13 01:30:00	2002-04-14 01:30:00	2002-04-14 16:00:00	3.49966	21.7	4.3	2002-04-13 02:00:00	2002-04-15 04:45:00	2002-04-17 20:00:00	1020	2700	1520	2.74719e+08
104	2002-05-25 13:00:00	2002-05-25 17:30:04	2002-05-25 21:00:00	0.2	1.1	36.5	2002-05-25 13:15:00	2002-05-25 13:15:00	2002-05-26 17:00:00	2370	2360	2077.5	15233.1
105	2002-05-26 09:00:00	2002-05-27 12:51:58	2002-05-27 20:00:00	0.2	5.2	36.2	2002-05-26 21:00:00	2002-05-28 19:30:00	2002-06-02 17:00:00	2067.5	2600	2447.5	2.22284e+08
106	2002-05-28 04:08:34	2002-05-28 07:30:00	2002-05-28 17:00:00	1.19983	3.1	6.3	2002-05-28 05:00:00	2002-05-29 16:00:00	2002-06-01 13:00:00	2310	2880	2700	1.08023e+08
107	2002-05-29 01:00:00	2002-05-29 01:30:00	2002-05-29 10:00:00	0.1	0.5	9.4	2002-05-29 01:00:00	2002-05-30 10:00:00	2002-05-31 09:00:00	2717.5	2990	2880	2.07059e+07
108	2002-11-19 06:00:00	2002-11-19 12:50:33	2002-11-20 01:00:00	0.2	2.4	3.5	2002-11-19 08:00:00	2002-11-20 07:45:00	2002-11-20 10:00:00	162.25	166	160	93669.2
109	2002-11-22 01:00:00	2002-11-22 01:30:00	2002-11-22 04:00:00	0.7	1.4	3.9	2002-11-22 01:00:00	2002-11-23 03:30:00	2002-11-24 09:00:00	162.25	178	173.5	1.48913e+06
110	2002-11-22 22:00:00	2002-11-23 10:30:02	2002-11-23 18:00:00	0.399938	3.1	3.8	2002-11-22 22:00:00	2002-11-23 14:00:00	2002-11-24 02:00:00	166.75	194	179.5	949245
111	2002-12-10 09:00:00	2002-12-10 10:30:01	2002-12-11 05:00:00	0.599934	4	0	2002-12-10 13:00:00	2002-12-11 07:15:00	2002-12-11 17:00:00	148	155	147.5	186011
112	2002-12-11 23:00:00	2002-12-11 23:30:00	2002-12-12 07:00:00	0.1	0.8	4	2002-12-11 23:00:00	2002-12-11 23:30:00	2002-12-12 10:00:00	147.5	149	147.5	27000
113	2002-12-13 01:00:00	2002-12-13 08:39:15	2002-12-13 11:00:00	0.2	1.3	4.8	2002-12-13 01:00:00	2002-12-13 15:15:00	2002-12-13 18:00:00	147.5	155	151.25	36936.4
114	2002-12-14	2002-12-14 14:30:04	2002-12-16 20:00:00	0.8	17.9	6.1	2002-12-14 01:00:00	2002-12-15 16:30:00	2002-12-17	152	178	171.25	1.57228e+06
115	2003-01-01 17:30:00	2003-01-03 00:30:03	2003-01-03 07:00:00	1.39903	7.5	22.7	2003-01-01 18:00:00	2003-01-03 09:15:00	2003-01-04 10:00:00	147.5	169	160	841674
116	2003-01-03 16:20:00	2003-01-03 17:29:58	2003-01-03 22:00:00	0.599899	1.5	19.4	2003-01-03 16:35:00	2003-01-03 17:00:00	2003-01-04 04:00:00	169	169	163.75	21645
117	2003-01-21 13:00:00	2003-01-22 22:30:03	2003-01-23 05:00:00	0.999915	14.7	0	2003-01-21 13:00:00	2003-01-24 01:30:00	2003-01-24 12:00:00	128	152	135.5	665569
118	2003-01-24 20:00:00	2003-01-26 12:54:02	2003-01-26 19:00:00	1	9.8	14.7	2003-01-24 20:00:00	2003-01-27 04:00:00	2003-01-27 20:00:00	140	226	203.5	2.11392e+06
119	2003-01-27 07:00:00	2003-01-27 20:23:08	2003-01-28 05:00:00	0.4	3.3	24.5	2003-01-27 07:15:00	2003-01-27 07:15:00	2003-01-28 14:00:00	218	215	197	102161
120	2003-01-29 14:00:00	2003-01-30 00:30:05	2003-01-30 11:00:00	0.7	7.5	13.1	2003-01-29 14:00:00	2003-01-31 11:00:00	2003-02-06 16:00:00	182.5	208	198	5.405e+07
121	2003-01-30 19:00:00	2003-01-30 21:30:14	2003-02-01 19:00:00	1.7	15.4	20.6	2003-01-30 20:00:00	2003-02-01 09:45:00	2003-02-03 08:00:00	184.75	461	281	2.89613e+07
122	2003-03-13 01:00:00	2003-03-13 01:30:00	2003-03-13 05:00:00	0.1	0.5	4.4	2003-03-13 01:00:00	2003-03-14 04:30:00	2003-03-19 14:00:00	239	310	282	3.53012e+07
123	2003-03-21 11:00:00	2003-03-22 10:30:03	2003-03-22 22:00:00	1.39972	14.2	10.2	2003-03-21 18:00:00	2003-03-23 09:30:00	2003-03-24 21:00:00	282	494	435	13580190
124	2003-03-31 06:00:00	2003-03-31 06:30:00	2003-03-31 08:00:00	0.3	0.5	2.5	2003-03-31 06:00:00	2003-04-01 07:15:00	2003-04-04 11:00:00	363	647	574	5.43929e+07
125	2003-04-01 00:10:00	2003-04-01 04:37:28	2003-04-01 22:00:00	0.712471	3.1	3.1	2003-04-01 01:00:00	2003-04-02 04:30:00	2003-04-02 23:00:00	542.125	736	681	1.25198e+07
126	2003-04-12 06:12:00	2003-04-12 09:29:56	2003-04-13 16:00:00	1.79889	6.4	0.6	2003-04-12 07:00:00	2003-04-14 14:45:00	2003-04-16	605	791	743	1.96729e+07
127	2003-04-23 09:00:00	2003-04-23 09:30:00	2003-04-23 11:00:00	0.1	0.3	1.3	2003-04-23 09:00:00	2003-04-24 10:15:00	2003-04-28 02:00:00	807.75	912	851	4.27173e+07
128	2003-04-24 23:00:00	2003-04-25 01:25:07	2003-04-25 14:00:00	0.6	2.9	0.3	2003-04-24 23:00:00	2003-04-26 03:30:00	2003-04-26 17:00:00	924	1020	988	5.17209e+06
129	2003-04-30 13:00:00	2003-04-30 18:29:59	2003-04-30 20:00:00	0.299996	1	3.7	2003-04-30 13:15:00	2003-04-30 13:45:00	2003-04-30 21:00:00	719	727	710.75	162029
130	2003-05-02 11:00:00	2003-05-02 11:30:00	2003-05-02 18:00:00	0.1	0.8	1.8	2003-05-02 16:00:00	2003-05-03 12:45:00	2003-05-07 23:00:00	692.25	719	708	2.75833e+07
131	2003-05-03 21:00:00	2003-05-03 21:30:00	2003-05-04	0.1	0.4	2.6	2003-05-03 21:00:00	2003-05-04 22:30:00	2003-05-06 09:00:00	725	813	789	7.70112e+06
132	2003-05-04 13:00:00	2003-05-04 18:29:59	2003-05-05 03:00:00	0.599998	3.5	3	2003-05-04 13:00:00	2003-05-05 06:15:00	2003-05-05 19:00:00	781.25	828	813	1.71461e+06
133	2003-05-12 06:00:00	2003-05-12 10:29:58	2003-05-12 16:00:00	0.299965	2	1.5	2003-05-12 11:00:00	2003-05-13 08:15:00	2003-05-20 18:00:00	547.5	574	566	7.3631e+07
134	2003-05-25 13:00:00	2003-05-26 06:30:02	2003-05-26 08:00:00	0.49976	3.4	0.7	2003-05-25 13:00:00	2003-05-26 10:45:00	2003-05-27 06:00:00	1047.5	1300	1220	1.43315e+07
135	2003-08-02 19:30:00	2003-08-03 03:29:59	2003-08-03 22:00:00	0.599997	5.2	0	2003-08-02 21:00:00	2003-08-03 14:15:00	2003-08-05 20:00:00	166	187	169	2.05907e+06
136	2003-10-28 05:15:00	2003-10-28 16:29:59	2003-10-29 12:00:00	1.69998	15.1	0.4	2003-10-28 08:00:00	2003-10-29 05:45:00	2003-10-31	116	172	129.5	4.86553e+06
137	2003-11-10 04:00:00	2003-11-11 06:29:54	2003-11-11 12:00:00	1.19947	11.8	0	2003-11-10 12:00:00	2003-11-11 06:00:00	2003-11-12 01:00:00	118.5	136	131	627057
138	2003-11-15 12:00:00	2003-11-16 19:30:00	2003-11-17 13:00:00	0.999958	12.3	11.8	2003-11-15 22:00:00	2003-11-17 15:15:00	2003-11-22 15:00:00	114.5	124	115	1.11407e+07
139	2003-11-17 22:00:00	2003-11-18 19:30:00	2003-11-19	1.39992	12.6	12.3	2003-11-18 09:00:00	2003-11-19 21:45:00	2003-11-20 08:00:00	122	166	152	2.26387e+06
140	2003-11-28 07:00:00	2003-11-29 02:30:04	2003-11-30 04:00:00	1.39974	18.6	8.8	2003-11-28 14:00:00	2003-11-29 19:45:00	2003-11-30 19:00:00	116.5	147	136	1.8697e+06
141	2003-12-02 03:00:00	2003-12-02 03:30:00	2003-12-02 05:00:00	0.1	0.3	20.7	2003-12-02 03:15:00	2003-12-02 03:15:00	2003-12-02 20:00:00	129	131	129	107100
142	2003-12-03 04:00:00	2003-12-03 05:30:01	2003-12-03 10:00:00	0.599901	1.8	20.1	2003-12-03 04:00:00	2003-12-03 10:00:00	2003-12-03 16:00:00	129	136	134	75037.5
143	2003-12-05 05:00:00	2003-12-06 09:29:57	2003-12-06 12:00:00	1.19969	10.7	3.3	2003-12-05 05:00:00	2003-12-06 13:15:00	2003-12-07 14:00:00	120.5	152	143.25	2.04844e+06
144	2003-12-08 09:00:00	2003-12-08 09:30:00	2003-12-08 16:00:00	0.1	0.8	12.5	2003-12-08 13:00:00	2003-12-08 21:00:00	2003-12-08 23:00:00	130.5	139	136	20205
145	2003-12-12 10:00:00	2003-12-14 01:29:58	2003-12-14 14:00:00	1.09985	13.9	1	2003-12-12 11:00:00	2003-12-12 21:30:00	2003-12-14 16:00:00	127	141	134.5	464888
146	2004-01-26 06:00:00	2004-01-30 05:30:04	2004-01-31 05:00:00	0.999742	19.2	11.6	2004-01-27 01:00:00	2004-01-30 18:30:00	2004-01-31 17:00:00	113.5	169	155	1.42195e+06
147	2004-03-18 06:00:00	2004-03-18 18:30:02	2004-03-18 20:00:00	0.299876	1.1	0.3	2004-03-18 06:00:00	2004-03-19 12:30:00	2004-03-20 16:00:00	244	382	319	9.289e+06
148	2004-04-08 10:30:00	2004-04-08 21:29:57	2004-04-09 01:00:00	0.399929	2.3	0	2004-04-08 11:00:00	2004-04-09 10:15:00	2004-04-09 16:00:00	630	664	655	575170
149	2004-04-13 16:00:00	2004-04-14 00:30:03	2004-04-14 16:00:00	0.999513	4.9	2.3	2004-04-13 16:00:00	2004-04-15 01:15:00	2004-04-16 15:00:00	626	882	781.25	2.50715e+07
150	2004-04-27 16:00:00	2004-04-28 02:30:05	2004-04-28 08:00:00	0.8	4.8	0.2	2004-04-27 16:00:00	2004-04-28 21:15:00	2004-04-30 01:00:00	474	655	603.25	1.31728e+07
151	2004-05-08 05:02:24	2004-05-08 05:32:24	2004-05-08 20:00:00	2.404	3.8	0	2004-05-08 10:00:00	2004-05-09 06:15:00	2004-05-09 16:00:00	716.25	751	736	1.10641e+06
152	2004-05-10 13:00:00	2004-05-11 05:30:00	2004-05-11 22:00:00	1.89978	19.8	3.8	2004-05-10 16:00:00	2004-05-11 15:30:00	2004-05-12 11:00:00	692.25	776	705.75	5.10883e+06
153	2004-05-16	2004-05-16 11:30:01	2004-05-16 17:00:00	1.39986	7.1	20.3	2004-05-16 00:15:00	2004-05-16 00:15:00	2004-05-16 18:00:00	487	487	481	94994.4
154	2004-05-18 05:20:00	2004-05-18 05:50:00	2004-05-18 12:00:00	0.266667	0.8	7.6	2004-05-18 13:00:00	2004-05-19 06:15:00	2004-05-19 08:00:00	485.5	494	490.5	12789.5
155	2004-05-25 21:10:00	2004-05-26 23:30:05	2004-05-27 06:00:00	1.89873	14.8	32.7	2004-05-26 01:00:00	2004-05-27 22:45:00	2004-05-29 22:00:00	961	1250	1170	3.01714e+07
156	2004-06-05 08:30:00	2004-06-05 12:30:01	2004-06-06 18:00:00	1.39971	6.1	3.2	2004-06-05 09:00:00	2004-06-06 05:45:00	2004-06-07 01:00:00	918	943	912	1.77073e+06
157	2004-08-22 09:00:00	2004-08-23 05:30:05	2004-08-23 16:00:00	0.6	5.7	6.7	2004-08-22 11:00:00	2004-08-24 11:00:00	2004-08-30 03:00:00	154.25	166	157	5.91456e+06
158	2004-08-24 07:00:00	2004-08-25 11:38:28	2004-08-26 14:00:00	1.9	28.4	10.3	2004-08-24 07:00:00	2004-08-26	2004-08-27 20:00:00	157.75	181	163	3.11349e+06
159	2004-12-07 05:12:00	2004-12-08 19:29:55	2004-12-08 22:00:00	1.19988	12.2	1.5	2004-12-07 06:00:00	2004-12-07 11:00:00	2004-12-08 23:00:00	130.5	134	131	66259.8
160	2004-12-11 21:00:00	2004-12-11 21:30:00	2004-12-11 23:00:00	0.1	0.3	30.1	2004-12-11 21:00:00	2004-12-11 22:15:00	2004-12-12 20:00:00	315	319	278	775458
161	2004-12-21 05:30:00	2004-12-21 07:30:04	2004-12-21 16:00:00	0.3	1.9	1.8	2004-12-21 05:45:00	2004-12-21 06:00:00	2004-12-21 17:00:00	172	172	166.75	37725
162	2005-03-28 16:00:00	2005-03-29 11:30:04	2005-03-30 11:00:00	0.5	7.9	22.3	2005-03-28 19:00:00	2005-03-29 02:30:00	2005-03-30 13:00:00	220	226	218	676982
163	2005-04-23 18:00:00	2005-04-23 22:29:58	2005-04-24 01:00:00	0.499965	1.8	0.2	2005-04-23 19:00:00	2005-04-25 00:30:00	2005-05-02 20:00:00	316	515	455.75	1.56621e+08
164	2005-04-26 21:00:00	2005-04-26 21:30:00	2005-04-26 23:00:00	0.3	0.5	1.8	2005-04-26 23:00:00	2005-04-27 17:15:00	2005-04-29 01:00:00	630	798	690	16860690
165	2005-05-03 02:00:00	2005-05-03 12:29:59	2005-05-03 16:00:00	0.299996	1.1	0	2005-05-03 02:15:00	2005-05-03 02:15:00	2005-05-03 20:00:00	454	454	442	167552
166	2005-05-04 12:00:00	2005-05-04 13:30:01	2005-05-04 17:00:00	0.299967	1	1.1	2005-05-04 12:15:00	2005-05-04 12:15:00	2005-05-04 18:00:00	442	442	436.75	20954.3
167	2005-05-09 12:00:00	2005-05-10 01:29:57	2005-05-10 10:00:00	0.599928	5	10.3	2005-05-09 14:00:00	2005-05-10 11:30:00	2005-05-11 12:00:00	659.5	708	690	2.37222e+06
168	2005-05-15 12:00:00	2005-05-16 22:29:58	2005-05-17 05:00:00	1.09995	12	0.9	2005-05-15 13:00:00	2005-05-17 16:45:00	2005-05-18 11:00:00	614	736	699	4.33361e+06
169	2005-05-31 05:30:00	2005-05-31 07:29:58	2005-05-31 10:00:00	1.89942	2.9	0	2005-05-31 08:00:00	2005-05-31 08:15:00	2005-05-31 11:00:00	440.25	442	435	10237.5
170	2005-05-31 18:20:00	2005-06-01 17:30:00	2005-06-03 05:00:00	0.999878	16.9	2.9	2005-06-01 02:00:00	2005-06-04	2005-06-06 16:00:00	430.5	672	609.5	3.15158e+07
171	2005-06-16 21:00:00	2005-06-17 07:29:53	2005-06-17 21:00:00	4.89481	16.4	4.3	2005-06-17 05:00:00	2005-06-17 15:00:00	2005-06-18 13:00:00	356.25	442	417	3.80119e+06
172	2005-09-11 04:12:00	2005-09-11 07:30:02	2005-09-11 16:00:00	0.699882	4.5	30.8	2005-09-12	2005-09-12 00:15:00	2005-09-12 04:00:00	121.5	122	120	10518.8
173	2005-09-12 01:30:00	2005-09-12 03:58:50	2005-09-12 21:00:00	0.2	2.2	35.3	2005-09-12 13:00:00	2005-09-13 10:15:00	2005-09-13 22:00:00	121	124	120	204784
174	2005-10-29 20:00:00	2005-10-29 23:30:03	2005-10-30 04:00:00	0.5	2.7	12.9	2005-10-30 01:00:00	2005-10-30 01:30:00	2005-10-30 06:00:00	115.5	117	115	25612.5
175	2005-11-01 06:00:00	2005-11-01 19:29:57	2005-11-01 20:00:00	2.39985	10.4	11.6	2005-11-01 06:00:00	2005-11-02 02:45:00	2005-11-02 13:00:00	134.5	175	163	673440
176	2006-01-07 08:00:00	2006-01-07 23:29:59	2006-01-08 05:00:00	0.699994	6	7.6	2006-01-07 11:00:00	2006-01-07 21:45:00	2006-01-08 14:00:00	135.5	139	136	168804
177	2006-01-09 13:00:00	2006-01-11 00:30:05	2006-01-12 13:00:00	2.19861	32.3	9.7	2006-01-09 22:00:00	2006-01-11 20:45:00	2006-01-12 22:00:00	136.75	249	218	7.06507e+06
178	2006-01-12 23:00:00	2006-01-13 14:29:59	2006-01-15 05:00:00	1	17.8	38.3	2006-01-13 16:00:00	2006-01-15 07:30:00	2006-01-16 14:00:00	206	300	274	6.4822e+06
179	2006-01-27 17:00:00	2006-01-28 22:30:04	2006-01-29 03:00:00	0.5	4.5	0.7	2006-01-27 18:00:00	2006-01-27 18:15:00	2006-01-29 04:00:00	190	191	187	86095.6
180	2006-01-29 12:00:00	2006-01-30 01:30:03	2006-01-31 05:00:00	0.999903	12.4	5.2	2006-01-29 12:00:00	2006-01-30 21:15:00	2006-02-03 23:00:00	184.75	208	201	4.11461e+06
181	2006-04-03 22:00:00	2006-04-06 04:30:04	2006-04-06 22:00:00	2.69876	28.4	7.5	2006-04-04	2006-04-07 08:45:00	2006-04-10 21:00:00	430.5	1620	1270	1.57389e+08
182	2006-04-10 12:00:00	2006-04-10 16:29:58	2006-04-10 19:00:00	0.399965	1.8	1.2	2006-04-10 12:15:00	2006-04-10 12:15:00	2006-04-10 21:00:00	1320	1330	1270	88071.4
183	2006-04-12 10:00:00	2006-04-12 14:29:58	2006-04-12 17:00:00	0.199965	0.9	3	2006-04-12 18:00:00	2006-04-13 07:00:00	2006-04-13 11:00:00	1115	1140	1130	195154
184	2006-04-14 06:00:00	2006-04-15 21:29:58	2006-04-16	0.599902	7.2	3.9	2006-04-14 06:00:00	2006-04-16 00:45:00	2006-04-16 20:00:00	1137.5	1280	1220	8.67908e+06
185	2006-04-22 06:00:00	2006-04-22 08:29:56	2006-04-22 09:00:00	0.299899	0.8	0	2006-04-22 06:00:00	2006-04-23 08:00:00	2006-04-25 03:00:00	1030	1200	1152.5	1.77341e+07
186	2006-04-29 20:30:00	2006-04-29 22:29:58	2006-04-30 05:00:00	1.19983	3.8	0	2006-04-29 21:00:00	2006-04-30 22:15:00	2006-05-02 15:00:00	1427.5	1810	1492.5	48681000
187	2006-05-19 12:00:00	2006-05-19 16:29:58	2006-05-19 18:00:00	0.399965	1	0	2006-05-19 15:00:00	2006-05-20 05:45:00	2006-05-20 11:00:00	2177.5	2270	2242.5	2.40379e+06
188	2006-06-11	2006-06-11 01:30:01	2006-06-11 03:00:00	0.399934	0.9	23.6	2006-06-11 00:15:00	2006-06-11 01:00:00	2006-06-11 04:00:00	975	975	959	10560
189	2006-06-16 19:00:00	2006-06-16 19:30:18	2006-06-16 23:00:00	2.2	4.6	24.5	2006-06-16 21:00:00	2006-06-17 00:15:00	2006-06-17 08:00:00	1007	1050	1020	692550
190	2006-11-02 15:00:00	2006-11-07 09:30:03	2006-11-07 21:00:00	2.8993	81	0.6	2006-11-02 15:00:00	2006-11-07 23:00:00	2006-11-09 14:00:00	130	699	417	4.13288e+07
191	2006-11-19 16:00:00	2006-11-20 05:30:03	2006-11-20 13:00:00	1.59953	10.7	12.5	2006-11-19 22:00:00	2006-11-21 07:45:00	2006-11-25 19:00:00	231	278	265	1.46445e+07
192	2006-11-21 03:20:00	2006-11-21 14:30:04	2006-11-21 23:00:00	1.69986	6.5	23.2	2006-11-21 07:00:00	2006-11-22 09:45:00	2006-11-22 22:00:00	275	296	287	1.03742e+06
193	2006-12-12 04:00:00	2006-12-12 05:30:01	2006-12-12 07:00:00	0.199967	0.5	0.1	2006-12-12 07:00:00	2006-12-12 08:45:00	2006-12-13 04:00:00	201.75	208	204	317684
194	2006-12-13 05:00:00	2006-12-13 11:30:01	2006-12-14 01:00:00	1.19972	6.5	0.6	2006-12-13 05:00:00	2006-12-14 21:15:00	2006-12-17 11:00:00	206	229	178	1.99898e+07
195	2006-12-14 13:00:00	2006-12-15 01:30:02	2006-12-15 04:00:00	2.19888	9.4	7.1	2006-12-14 17:00:00	2006-12-15 16:15:00	2006-12-16 16:00:00	226	291	269	3.93173e+06
196	2006-12-21 08:00:00	2006-12-21 09:30:01	2006-12-21 14:00:00	0.199967	0.6	0	2006-12-21 10:00:00	2006-12-21 17:00:00	2006-12-21 19:00:00	187	204	194	48650
197	2006-12-23 09:00:00	2006-12-23 12:33:33	2006-12-23 21:00:00	0.4	2.7	0.8	2006-12-23 15:00:00	2006-12-23 22:00:00	2006-12-24 09:00:00	181.75	187	184	163322
198	2006-12-25 01:00:00	2006-12-25 03:30:02	2006-12-25 16:00:00	0.399934	3.5	3.5	2006-12-25 04:00:00	2006-12-26 15:45:00	2006-12-29 09:00:00	184	208	194	5.32097e+06
199	2006-12-26 01:00:00	2006-12-27 09:30:01	2006-12-28 05:00:00	0.799892	13.4	7	2006-12-26 02:00:00	2006-12-27 05:30:00	2006-12-28 06:00:00	197	218	208	1.08268e+06
200	2007-01-02 05:30:00	2007-01-03 13:29:58	2007-01-04 08:00:00	3.19927	16.6	0	2007-01-02 09:00:00	2007-01-03 15:45:00	2007-01-05 01:00:00	204	249	237	3.25769e+06
201	2007-03-10 22:00:00	2007-03-10 23:29:19	2007-03-12 12:00:00	0.5	5.7	4	2007-03-10 22:00:00	2007-03-13 11:45:00	2007-03-15 15:00:00	264	1270	838	1.10355e+08
202	2007-03-15 23:00:00	2007-03-16 05:30:01	2007-03-16 16:00:00	0.599907	3.9	5.9	2007-03-15 23:15:00	2007-03-15 23:15:00	2007-03-17 01:00:00	813	813	699	428094
203	2007-03-20 05:10:00	2007-03-20 07:30:01	2007-03-20 16:00:00	0.599967	3.9	3.9	2007-03-20 06:00:00	2007-03-20 23:30:00	2007-03-21 20:00:00	914	967	920	3.96731e+06
204	2007-03-24 06:00:00	2007-03-25 05:30:03	2007-03-25 20:00:00	1.89899	15.8	5.3	2007-03-24 07:00:00	2007-03-26 12:45:00	2007-03-29 03:00:00	772	1080	901	4.94307e+07
205	2007-05-02	2007-05-02 01:30:01	2007-05-02 17:00:00	0.299934	1.7	0	2007-05-02	2007-05-03 06:00:00	2007-05-04 10:00:00	937.75	1050	1010	9.52525e+06
206	2007-05-13 04:00:00	2007-05-13 07:49:59	2007-05-13 13:00:00	0.233333	1.1	0	2007-05-13 05:00:00	2007-05-13 14:00:00	2007-05-14 08:00:00	1057.5	1090	1070	1.62721e+06
207	2007-10-04 03:00:00	2007-10-04 13:29:59	2007-10-05 08:00:00	0.699973	3.4	25.5	2007-10-04 05:00:00	2007-10-05 20:00:00	2007-10-07 01:00:00	142.5	157	144	1.87088e+06
208	2007-11-15 09:00:00	2007-11-16 15:29:59	2007-11-16 21:00:00	0.799908	7.6	13.6	2007-11-16 04:00:00	2007-11-17 20:00:00	2007-11-20 09:00:00	133.25	157	149	4.69051e+06
209	2007-11-17 06:00:00	2007-11-17 17:30:01	2007-11-18	1.59994	14.1	16.5	2007-11-17 10:00:00	2007-11-18 01:15:00	2007-11-19 19:00:00	139.5	169	160	2.66672e+06
210	2007-12-04 19:20:00	2007-12-04 19:50:00	2007-12-04 21:00:00	0.233333	0.4	38.5	2007-12-04 20:00:00	2007-12-05 06:30:00	2007-12-05 17:00:00	262	300	278	1.50981e+06
211	2007-12-17 03:00:00	2007-12-17 04:30:01	2007-12-17 12:00:00	0.299967	1.3	1.2	2007-12-17 03:00:00	2007-12-17 19:00:00	2007-12-17 22:00:00	148	152	149	41684.2
212	2007-12-18 12:00:00	2007-12-18 19:30:02	2007-12-19 05:00:00	0.799744	5.8	2.5	2007-12-18 16:00:00	2007-12-20	2007-12-20 21:00:00	147	155	152	474092
213	2007-12-19 13:00:00	2007-12-19 16:24:14	2007-12-20 16:00:00	0.5	6.3	8.3	2007-12-19 19:00:00	2007-12-20 08:15:00	2007-12-20 21:00:00	149.75	157	152	354996
214	2007-12-22 15:30:00	2007-12-23 22:29:57	2007-12-24 15:00:00	1.09967	12.8	13.4	2007-12-22 16:00:00	2007-12-23 22:30:00	2007-12-25 07:00:00	104	157	141	4422900
215	2008-01-02 17:00:00	2008-01-02 20:28:39	2008-01-03 01:00:00	0.2	1.2	3.3	2008-01-02 22:00:00	2008-01-03 20:15:00	2008-01-04 04:00:00	127.5	141	136	172395
216	2008-01-04 12:05:27	2008-01-04 13:29:57	2008-01-06 16:00:00	2.49904	11.7	4.5	2008-01-04 18:00:00	2008-01-04 23:00:00	2008-01-06 17:00:00	132.5	139	131	515714
217	2008-01-19 15:00:00	2008-01-19 19:29:58	2008-01-20 05:00:00	0.399965	2.8	2.8	2008-01-19 15:15:00	2008-01-21	2008-01-21 12:00:00	109	109	60.175	468.281
218	2008-01-26 11:00:00	2008-01-27 14:30:02	2008-01-28 05:00:00	1.59994	36.5	0	2008-01-26 11:00:00	2008-01-27 10:30:00	2008-01-28 10:00:00	103	191	122	2.2681e+06
219	2008-02-06 23:00:00	2008-02-07 07:29:57	2008-02-08 05:00:00	1.09993	10	1.8	2008-02-07 05:00:00	2008-02-07 10:00:00	2008-02-08 06:00:00	112	115	113	44154
220	2008-02-10 05:20:00	2008-02-10 18:30:01	2008-02-11 04:00:00	0.799887	6.9	11.9	2008-02-10 11:00:00	2008-02-10 22:45:00	2008-02-12 05:00:00	117	134	129	1.05814e+06
221	2008-02-12 05:30:00	2008-02-12 18:29:59	2008-02-13 05:00:00	1.49999	6	17	2008-02-12 07:00:00	2008-02-13 15:00:00	2008-02-14 05:00:00	131	147	141	744652
222	2008-04-14 12:00:00	2008-04-14 16:29:58	2008-04-14 22:00:00	0.29993	1.3	0.2	2008-04-14 12:00:00	2008-04-15 13:30:00	2008-04-16 04:00:00	426	551	515	5.15486e+06
223	2008-04-30 13:00:00	2008-04-30 13:30:00	2008-04-30 18:00:00	0.1	0.3	2.5	2008-04-30 13:15:00	2008-04-30 13:15:00	2008-04-30 21:00:00	844	836	791	1683.87
224	2008-05-07 08:00:00	2008-05-07 08:30:00	2008-05-07 14:00:00	0.1	0.6	0	2008-05-07 08:00:00	2008-05-07 16:00:00	2008-05-08 10:00:00	1780	1870	1837.5	3.80298e+06
225	2008-05-28 19:00:00	2008-05-29 12:30:02	2008-05-30 05:00:00	1	6.3	5.2	2008-05-28 21:00:00	2008-05-31 04:45:00	2008-05-31 19:00:00	2032.5	2250	2190	1.54475e+07
226	2008-06-09 07:15:00	2008-06-11 16:29:59	2008-06-12 05:00:00	1.99998	28.5	8.7	2008-06-10 05:00:00	2008-06-13 04:45:00	2008-06-20 01:00:00	1215	1320	1280	1.00357e+08
227	2008-06-21 15:00:00	2008-06-21 23:30:03	2008-06-22 04:00:00	0.699903	3	0	2008-06-21 23:00:00	2008-06-22 14:15:00	2008-06-23 14:00:00	1225	1350	1270	9.42551e+06
228	2008-07-01 05:30:00	2008-07-01 19:30:01	2008-07-01 23:00:00	4.79958	12	0	2008-07-01 13:00:00	2008-07-02 01:15:00	2008-07-03 02:00:00	830	889	806	4.06121e+06
229	2008-08-19 09:00:00	2008-08-19 12:25:08	2008-08-19 14:00:00	0.4	1.4	0	2008-08-19 09:00:00	2008-08-20 13:45:00	2008-08-24 22:00:00	197	218	201	1.20296e+07
230	2008-08-20 02:00:00	2008-08-21 02:29:58	2008-08-21 17:00:00	2.7994	21.5	1.4	2008-08-20 08:00:00	2008-08-21 05:00:00	2008-08-23 03:00:00	207	265	218	6.73155e+06
231	2008-10-02 22:00:00	2008-10-03 01:30:03	2008-10-03 03:00:00	0.599901	1.5	0	2008-10-03	2008-10-03 07:45:00	2008-10-09 01:00:00	167	170	167	2.6172e+06
232	2008-11-09 14:00:00	2008-11-09 14:30:00	2008-11-09 17:00:00	0.1	0.3	14.5	2008-11-09 14:15:00	2008-11-09 14:15:00	2008-11-09 20:00:00	178	178	175	25591.3
233	2008-11-10 14:00:00	2008-11-10 14:30:00	2008-11-10 18:00:00	0.1	0.5	11.7	2008-11-10 15:00:00	2008-11-10 15:30:00	2008-11-11 05:00:00	173.5	175	173	64944.6
234	2008-11-12 03:00:00	2008-11-12 20:30:02	2008-11-13	4.79964	28.7	12.5	2008-11-12 03:00:00	2008-11-13 15:00:00	2008-11-15	173	498	355	2.43403e+07
235	2009-01-01 05:00:00	2009-01-02 06:29:59	2009-01-02 17:00:00	2.19994	19.5	42.7	2009-01-01 21:00:00	2009-01-02 07:45:00	2009-01-02 18:00:00	147	154	144	347946
236	2009-01-05 01:00:00	2009-01-08 00:30:00	2009-01-09 05:00:00	1.49999	46.7	22.1	2009-01-05 01:00:00	2009-01-08 18:30:00	2009-01-09 16:00:00	146.25	503	397	1.11864e+07
237	2009-01-27 09:00:00	2009-01-27 15:30:01	2009-01-28 03:00:00	0.599969	3.9	0	2009-01-27 10:00:00	2009-01-27 14:30:00	2009-01-29 04:00:00	128	223	187	3.3359e+06
238	2009-03-02 07:00:00	2009-03-03 03:30:05	2009-03-04 03:00:00	1.8992	9.8	0	2009-03-02 07:00:00	2009-03-05	2009-03-06 15:00:00	170.75	272	230	1.34981e+07
239	2009-03-16 12:00:00	2009-03-17 17:29:58	2009-03-18 05:00:00	0.59991	7	18.1	2009-03-16 12:15:00	2009-03-16 12:15:00	2009-03-18 06:00:00	217	217	201	29586.8
240	2009-03-21 09:00:00	2009-03-21 23:29:58	2009-03-22 02:00:00	0.299961	1.7	7	2009-03-21 09:00:00	2009-03-23 01:45:00	2009-03-27 12:00:00	251.75	388	346	4.26234e+07
241	2009-04-03 02:00:00	2009-04-03 03:30:07	2009-04-03 18:00:00	0.2	1.9	16.3	2009-04-03 03:00:00	2009-04-03 17:15:00	2009-04-03 20:00:00	296	300	292	67182.4
242	2009-04-12 18:30:00	2009-04-12 23:30:02	2009-04-14 05:00:00	0.799805	6.1	0	2009-04-12 21:00:00	2009-04-14 05:15:00	2009-04-15 19:00:00	808	1040	892	26988660
243	2009-04-17 17:00:00	2009-04-17 17:30:00	2009-04-18 01:00:00	0.1	0.4	6.1	2009-04-17 22:00:00	2009-04-19	2009-04-29 13:00:00	773	863	833	5.37791e+08
244	2009-05-15 03:00:00	2009-05-15 03:30:00	2009-05-15 05:00:00	0.1	0.3	28	2009-05-15 03:00:00	2009-05-15 03:15:00	2009-05-15 09:00:00	1100	1100	1090	36375
245	2009-05-18 23:00:00	2009-05-19 05:30:01	2009-05-19 15:00:00	0.299938	1.1	17.7	2009-05-18 23:00:00	2009-05-19 22:15:00	2009-05-21 23:00:00	1425	1870	1410	66107250
246	2009-07-13 06:30:00	2009-07-13 08:29:58	2009-07-14 03:00:00	2.99918	17.3	0	2009-07-13 07:00:00	2009-07-14 14:00:00	2009-07-15 23:00:00	284	333	288	6.18699e+06
247	2009-10-19 14:00:00	2009-10-19 14:30:00	2009-10-19 18:00:00	0.1	0.5	14.5	2009-10-19 14:15:00	2009-10-19 14:15:00	2009-10-19 22:00:00	144	144	142	21948.4
248	2009-10-21 12:20:00	2009-10-21 12:50:00	2009-10-21 17:00:00	0.233333	0.6	3.3	2009-10-21 23:00:00	2009-10-22 04:15:00	2009-10-22 11:00:00	140.5	144	140.5	61875
249	2009-10-26 01:00:00	2009-10-26 15:30:04	2009-10-26 23:00:00	1.89973	10.9	12.8	2009-10-26 08:00:00	2009-10-27 01:00:00	2009-10-28 03:00:00	157	184	162	1.60637e+06
250	2009-10-29 08:00:00	2009-10-29 08:30:00	2009-10-29 11:00:00	0.1	0.4	23	2009-10-29 08:15:00	2009-10-29 08:45:00	2009-10-29 12:00:00	152	152	149	900
251	2009-10-29 19:00:00	2009-10-31 10:43:11	2009-10-31 14:00:00	0.8	8.6	11.3	2009-10-31	2009-11-01 03:00:00	2009-11-01 21:00:00	148	165	159	931666
252	2009-11-06	2009-11-06 05:29:59	2009-11-07 12:00:00	1.59997	9.4	0.5	2009-11-06 05:00:00	2009-11-06 10:45:00	2009-11-07 18:00:00	149.75	165	159	986006
253	2009-12-16 21:00:00	2009-12-16 22:30:13	2009-12-17 05:00:00	0.5	2.3	13.1	2009-12-16 21:15:00	2009-12-16 21:15:00	2009-12-17 13:00:00	128	128	127.5	13296.4
254	2009-12-19 12:00:00	2009-12-20 04:30:00	2009-12-22 14:00:00	0.599865	9.4	13.2	2009-12-19 13:00:00	2009-12-22 02:15:00	2009-12-23 01:00:00	126	137	133	784819
255	2010-01-04 05:30:00	2010-01-05 05:30:00	2010-01-05 21:00:00	0.499976	10.7	4.7	2010-01-04 14:00:00	2010-01-05 03:30:00	2010-01-06 04:00:00	125	128	126	239856
256	2010-02-14 17:00:00	2010-02-15 03:29:59	2010-02-15 05:00:00	0.299996	2.3	3.2	2010-02-14 20:00:00	2010-02-16 04:00:00	2010-02-18 11:00:00	122.5	126	124	668079
257	2010-03-22 13:00:00	2010-03-22 13:30:00	2010-03-22 18:00:00	0.1	0.3	0.2	2010-03-22 13:15:00	2010-03-22 17:45:00	2010-03-24 04:00:00	133	133	130	199905
258	2010-03-23 03:00:00	2010-03-23 03:30:00	2010-03-23 05:00:00	0.1	0.3	0.5	2010-03-23 03:15:00	2010-03-23 03:15:00	2010-03-24 04:00:00	133	133	130	124364
259	2010-03-28 14:00:00	2010-03-29 15:29:59	2010-03-30 05:00:00	3.29994	24.3	0.3	2010-03-28 17:00:00	2010-03-30 12:30:00	2010-03-31 04:00:00	137	233	208	2.89822e+06
260	2010-04-27 06:00:00	2010-04-27 19:47:59	2010-04-30 05:00:00	0.5	14.1	0.8	2010-04-27 18:00:00	2010-04-29 06:30:00	2010-04-30 21:00:00	474	539	498	8346672
261	2010-05-09 12:15:00	2010-05-09 12:45:00	2010-05-09 20:00:00	0.325	0.7	4.1	2010-05-09 12:30:00	2010-05-09 12:30:00	2010-05-09 21:00:00	392	392	383	56541.2
262	2010-05-15 08:00:00	2010-05-15 08:30:00	2010-05-15 10:00:00	0.1	0.3	0.7	2010-05-15 08:00:00	2010-05-16 10:00:00	2010-05-24 13:00:00	482.25	601	563	2.06912e+08
263	2010-05-17 17:00:00	2010-05-17 17:30:00	2010-05-17 22:00:00	0.3	0.8	0.3	2010-05-17 17:00:00	2010-05-18 20:30:00	2010-05-22 08:00:00	798	999	754	6.17904e+07
264	2010-05-18 10:30:00	2010-05-18 19:30:01	2010-05-19 01:00:00	0.499858	1.8	1.1	2010-05-18 11:00:00	2010-05-19 09:00:00	2010-05-20 07:00:00	944	1030	995	5.80533e+06
265	2010-06-04 05:08:34	2010-06-04 08:30:00	2010-06-04 23:00:00	1.89998	10.6	17	2010-06-04 12:00:00	2010-06-05 07:30:00	2010-06-06 02:00:00	918	1020	983	5.15059e+06
266	2010-06-16 04:00:00	2010-06-16 07:29:57	2010-06-18 03:00:00	3.29908	36.3	0	2010-06-16 07:00:00	2010-06-19 02:30:00	2010-06-26 09:00:00	619.25	894	817	1.75254e+08
267	2010-06-20 10:00:00	2010-06-21 01:29:59	2010-06-21 16:00:00	2.69998	26.5	36.4	2010-06-20 18:00:00	2010-06-22 10:45:00	2010-06-23 13:00:00	916	1110	1060	18421200
268	2010-08-10 23:07:30	2010-08-10 23:37:30	2010-08-11 02:00:00	0.7625	1.5	0.5	2010-08-11 01:00:00	2010-08-11 14:00:00	2010-08-12 21:00:00	184	192	184.75	584802
269	2010-08-12 18:02:36	2010-08-12 23:29:53	2010-08-13 02:00:00	2.8982	13.8	1.6	2010-08-12 21:00:00	2010-08-13 11:00:00	2010-08-14 22:00:00	184.75	214	189	2.78995e+06
270	2010-09-01	2010-09-01 05:29:59	2010-09-01 20:00:00	0.59999	7.4	7.8	2010-09-01 05:00:00	2010-09-02 12:15:00	2010-09-04 21:00:00	146.25	162	149	1.47937e+06
271	2010-11-14 06:00:00	2010-11-14 07:30:01	2010-11-14 09:00:00	0.499868	1.1	1.1	2010-11-14 06:15:00	2010-11-14 08:45:00	2010-11-21 15:00:00	130	130	128	1.32345e+07
272	2010-11-15 11:00:00	2010-11-16 00:29:57	2010-11-19 17:00:00	2.29922	48.8	1.5	2010-11-15 19:00:00	2010-11-16 21:30:00	2010-11-19 18:00:00	131.5	178	152	7.01397e+06
273	2010-12-11 19:00:00	2010-12-14 08:40:25	2010-12-15 04:00:00	2.3	49.4	28.6	2010-12-12 10:00:00	2010-12-15 00:15:00	2010-12-16 11:00:00	136.5	373	276	2.68035e+07
274	2011-01-15 21:00:00	2011-01-17 01:30:03	2011-01-17 14:00:00	1.89901	23.5	20.3	2011-01-15 21:00:00	2011-01-17 19:45:00	2011-01-19 15:00:00	230	1090	722	84772680
275	2011-01-17 23:00:00	2011-01-17 23:30:00	2011-01-18 02:00:00	0.1	0.4	43.8	2011-01-17 23:15:00	2011-01-17 23:15:00	2011-01-18 16:00:00	1090	1090	958	1.16097e+06
276	2011-02-04 07:00:00	2011-02-04 11:28:58	2011-02-04 23:00:00	0.2	1.8	0	2011-02-04 09:00:00	2011-02-05 01:45:00	2011-02-05 04:00:00	279	369	321	313982
277	2011-02-12 14:00:00	2011-02-13 00:29:59	2011-02-13 04:00:00	1.19998	4.4	0.9	2011-02-12 15:00:00	2011-02-13 08:30:00	2011-02-13 18:00:00	249	276	269	616400
278	2011-02-14 17:00:00	2011-02-15 09:26:30	2011-02-17 02:00:00	1.1	21.8	4.4	2011-02-15 02:00:00	2011-02-16 03:45:00	2011-02-17 04:00:00	272	304	292	1491840
279	2011-03-27 07:00:00	2011-03-27 09:28:50	2011-03-27 20:00:00	0.2	1.8	0.6	2011-03-27 07:00:00	2011-03-27 19:15:00	2011-03-27 21:00:00	403.25	412	407	83491.1
280	2011-03-29 23:00:00	2011-04-02 04:29:55	2011-04-03 19:00:00	1.09987	24.8	2.4	2011-03-30	2011-04-03 04:45:00	2011-04-05	412	1540	1247.5	1.24736e+08
281	2011-05-15 20:05:27	2011-05-15 21:30:03	2011-05-16 18:00:00	4.09829	12.3	0.4	2011-05-15 21:00:00	2011-05-16 21:30:00	2011-05-19 23:00:00	3847.5	4590	2530	1.25987e+08
282	2011-05-24	2011-05-24 09:30:04	2011-05-24 18:00:00	1.39987	7.9	0.7	2011-05-24 12:00:00	2011-05-25 12:00:00	2011-05-30 13:00:00	2722.5	2850	1870	1.48366e+08
283	2011-05-25 02:00:00	2011-05-25 02:30:00	2011-05-25 08:00:00	0.1	0.4	8.6	2011-05-25 02:00:00	2011-05-26 07:15:00	2011-05-30 13:00:00	2802.5	2900	1870	1.07095e+08
284	2011-05-25 23:00:00	2011-05-26 05:30:01	2011-05-27 16:00:00	1.49969	11.6	9	2011-05-26	2011-05-26 18:30:00	2011-05-30 13:00:00	2827.5	3020	1870	6.38291e+07
285	2011-06-02 06:00:00	2011-06-03 00:36:58	2011-06-03 05:00:00	0.4	4.3	14.9	2011-06-02 06:00:00	2011-06-03 07:00:00	2011-06-04 10:00:00	2215	2340	2190	1.44159e+07
286	2011-06-06 15:05:27	2011-06-06 16:29:57	2011-06-06 20:00:00	2.19925	5.5	4.7	2011-06-06 16:00:00	2011-06-07 19:15:00	2011-06-11 09:00:00	2567.5	3230	2882.5	2.17161e+08
287	2011-06-07 06:00:00	2011-06-08 07:29:53	2011-06-08 17:00:00	1.99859	20.1	10.2	2011-06-07 06:00:00	2011-06-09 08:15:00	2011-06-11 09:00:00	2890	3830	2882.5	161806500
288	2011-10-05 05:00:00	2011-10-05 17:30:02	2011-10-08	2	28.3	4.1	2011-10-05 08:00:00	2011-10-06 05:45:00	2011-10-09 06:00:00	198.75	233	207	5.59636e+06
289	2011-11-21 12:00:00	2011-11-22 10:30:02	2011-11-24 05:00:00	0.999651	14.1	14.6	2011-11-22 01:00:00	2011-11-24 07:45:00	2011-11-25 19:00:00	174	214	201.75	3.15053e+06
290	2011-12-12 23:00:00	2011-12-12 23:30:00	2011-12-13 05:00:00	0.1	0.6	0.8	2011-12-12 23:15:00	2011-12-13	2011-12-13 08:00:00	167	167	165	25650
291	2011-12-21 06:00:00	2011-12-21 06:30:00	2011-12-21 10:00:00	0.1	0.5	0.3	2011-12-21 08:00:00	2011-12-21 08:45:00	2011-12-21 13:00:00	162.75	165	162	16098.8
292	2011-12-27 06:00:00	2011-12-29 01:29:56	2011-12-29 08:00:00	2.89992	27.7	2.3	2011-12-27 14:00:00	2011-12-29 10:30:00	2011-12-31 10:00:00	159.75	223	204.25	5.16738e+06
293	2011-12-29 23:30:00	2011-12-30 07:29:53	2011-12-30 16:00:00	1.59873	11.3	29.6	2011-12-30 05:00:00	2011-12-30 12:45:00	2011-12-31 01:00:00	211	223	214	310500
294	2012-01-10	2012-01-10 02:39:57	2012-01-10 08:00:00	0.51248	2	1.3	2012-01-10 05:00:00	2012-01-10 08:45:00	2012-01-10 16:00:00	168.5	178	172.25	137552
295	2012-01-10 18:00:00	2012-01-10 19:30:01	2012-01-10 23:00:00	0.299967	1	3.3	2012-01-10 18:15:00	2012-01-10 19:00:00	2012-01-14 03:00:00	173	173	157	57162.9
296	2012-01-14 18:00:00	2012-01-14 19:30:01	2012-01-14 23:00:00	0.399967	1.3	3	2012-01-14 18:00:00	2012-01-14 21:15:00	2012-01-15 08:00:00	167.75	181	167	365227
297	2012-01-17 06:00:00	2012-01-17 17:37:19	2012-01-17 21:00:00	0.4	3.5	1.3	2012-01-17 07:00:00	2012-01-17 18:45:00	2012-01-18 03:00:00	158	165	157	146509
298	2012-01-18 07:00:00	2012-01-19 12:29:58	2012-01-20 02:00:00	1.39993	20.3	4.8	2012-01-18 13:00:00	2012-01-20 12:45:00	2012-01-20 17:00:00	152.5	165	152.5	427500
299	2012-01-21 05:02:24	2012-01-21 05:32:24	2012-01-22 03:00:00	2.45603	11.2	23.8	2012-01-21 07:00:00	2012-01-21 20:30:00	2012-01-22 06:00:00	162.75	175	167	317903
300	2012-01-26 02:30:00	2012-01-26 07:29:56	2012-01-26 16:00:00	1.19959	5.6	29	2012-01-26 06:00:00	2012-01-26 14:15:00	2012-01-26 18:00:00	175.75	184	178.75	75600
301	2012-01-29 10:00:00	2012-01-30 04:29:57	2012-01-30 17:00:00	0.499926	5.1	17.6	2012-01-29 10:00:00	2012-01-30 16:15:00	2012-01-31 12:00:00	174.5	192	186.25	640437
302	2012-02-18 03:00:00	2012-02-19 04:29:59	2012-02-19 05:00:00	0.29999	2.2	1	2012-02-18 03:00:00	2012-02-18 06:45:00	2012-02-19 08:00:00	157	159	155.5	79343.5
303	2012-02-21 02:00:00	2012-02-22 06:30:03	2012-02-23 11:00:00	1.89919	18.2	2.4	2012-02-21 06:00:00	2012-02-22 23:30:00	2012-02-23 20:00:00	153	240	214.75	3.34588e+06
304	2012-03-23	2012-03-23 01:30:01	2012-03-23 21:00:00	1.3999	6.8	29.8	2012-03-23	2012-03-23 00:30:00	2012-03-24 06:00:00	335	337	329	66735
305	2012-03-24 07:00:00	2012-03-24 07:30:00	2012-03-24 11:00:00	0.1	0.5	33	2012-03-24 10:00:00	2012-03-25 00:30:00	2012-03-25 04:00:00	327.75	333	330	20475
306	2012-03-29	2012-03-30 11:29:53	2012-04-01 19:00:00	2.5987	38.7	8.2	2012-03-29	2012-04-01 10:15:00	2012-04-02 21:00:00	448	1450	1142.5	1.0399e+08
307	2012-04-11 17:15:00	2012-04-11 21:30:08	2012-04-12 05:00:00	0.4	2.6	0	2012-04-11 18:00:00	2012-04-13 04:15:00	2012-04-15 21:00:00	884.5	1390	1210	7.81048e+07
308	2012-04-16 13:00:00	2012-04-16 22:02:49	2012-04-17 04:00:00	0.4	2.5	2.8	2012-04-16 13:15:00	2012-04-16 13:30:00	2012-04-17 15:00:00	1160	1170	1110	258990
309	2012-04-17 23:00:00	2012-04-18 19:29:59	2012-04-19 02:00:00	0.59996	5.9	2.7	2012-04-17 23:00:00	2012-04-19 08:15:00	2012-04-19 14:00:00	1095	1160	1140	1.10951e+06
310	2012-04-24 12:15:00	2012-04-24 12:45:00	2012-04-24 16:00:00	0.308333	0.5	6.7	2012-04-24 13:00:00	2012-04-25 13:45:00	2012-04-26 02:00:00	3362.5	3800	3652.5	1.71108e+07
311	2012-05-22 20:00:00	2012-05-22 23:29:57	2012-05-23 03:00:00	0.199932	0.9	14.5	2012-05-22 21:00:00	2012-05-23 06:15:00	2012-05-24 10:00:00	1590	1610	1410	4.38653e+06
312	2012-05-29 05:00:00	2012-05-29 06:29:55	2012-05-29 12:00:00	4.1959	8.2	4.1	2012-05-29 06:00:00	2012-05-29 11:15:00	2012-05-29 13:00:00	940	975	964	158786
313	2012-06-04 12:12:00	2012-06-05 18:30:04	2012-06-06 17:00:00	2.19804	24.2	6.7	2012-06-04 16:00:00	2012-06-06 08:00:00	2012-06-07 02:00:00	1190	1380	1297.5	1.08772e+07
314	2012-10-25 01:00:00	2012-10-25 06:29:59	2012-10-25 07:00:00	1.80495	2.4	14.9	2012-10-25 03:00:00	2012-10-25 19:00:00	2012-10-26 11:00:00	173.5	178	173	223766
315	2012-10-29 01:00:00	2012-10-29 05:29:58	2012-10-30 03:00:00	3.49906	14.7	9.2	2012-10-29 03:00:00	2012-10-29 15:30:00	2012-11-01 10:00:00	185.5	258	201.75	9.57994e+06
316	2012-11-17 20:00:00	2012-11-18 01:29:59	2012-11-18 04:00:00	0.199998	1	2.9	2012-11-18 01:00:00	2012-11-18 04:00:00	2012-11-18 06:00:00	174	181	178.75	14028.8
317	2012-11-19 05:30:00	2012-11-20 10:30:00	2012-11-22 01:00:00	2.29991	31.2	2.9	2012-11-19 15:00:00	2012-11-21 13:30:00	2012-11-23 04:00:00	178.75	388	288	1.91248e+07
318	2012-12-04 05:00:00	2012-12-04 05:30:00	2012-12-04 11:00:00	0.6	2.5	24.5	2012-12-04 05:00:00	2012-12-05 10:30:00	2012-12-08 13:00:00	290	355	337	1.44228e+07
319	2012-12-04 21:30:00	2012-12-05 03:29:57	2012-12-06 04:00:00	1.5995	7.1	27	2012-12-04 22:00:00	2012-12-06 04:45:00	2012-12-07 07:00:00	284	402	370	7.6174e+06
320	2013-01-07 06:00:00	2013-01-07 13:20:13	2013-01-08 03:00:00	0.2	2.4	0	2013-01-07 15:00:00	2013-01-08 00:15:00	2013-01-08 06:00:00	187.5	198	192	121972
321	2013-01-09 10:00:00	2013-01-09 16:30:01	2013-01-10 21:00:00	1.19985	8.7	3.4	2013-01-09 11:00:00	2013-01-09 22:00:00	2013-01-10 23:00:00	196.5	211	204	800325
322	2013-01-23 17:00:00	2013-01-23 21:29:58	2013-01-24 15:00:00	0.499965	2.9	0	2013-01-23 17:00:00	2013-01-23 22:30:00	2013-01-25 01:00:00	166	184	178	958584
323	2013-01-25 16:00:00	2013-01-26 07:29:59	2013-01-26 11:00:00	0.799976	3.1	3.3	2013-01-25 18:00:00	2013-01-26 20:00:00	2013-01-27 04:00:00	178.75	198	192	299197
324	2013-03-15 19:00:00	2013-03-16 23:37:04	2013-03-18 04:00:00	0.4	6.5	1.4	2013-03-15 19:00:00	2013-03-17 10:45:00	2013-03-18 05:00:00	331	453	420.75	6.2288e+06
325	2013-03-28 12:00:00	2013-03-28 12:30:00	2013-03-28 18:00:00	0.1	0.3	0.2	2013-03-28 21:00:00	2013-03-29 16:30:00	2013-03-29 18:00:00	329	346	337	45728.6
326	2013-04-04 14:00:00	2013-04-04 18:29:58	2013-04-06 16:00:00	0.599895	7.9	0	2013-04-04 14:00:00	2013-04-06 17:15:00	2013-04-08 18:00:00	1010	1340	1160	46152450
327	2013-05-21 16:00:00	2013-05-22 14:30:02	2013-05-23 08:00:00	2.69977	27.6	4.8	2013-05-21 20:00:00	2013-05-22 22:00:00	2013-05-23 16:00:00	1092.5	1210	1160	5.79358e+06
328	2013-06-07 06:00:00	2013-06-07 17:30:01	2013-06-08 05:00:00	0.199971	2.5	18.7	2013-06-07 08:00:00	2013-06-08 04:30:00	2013-06-08 22:00:00	748	769	736	2.35772e+06
329	2013-06-18 12:30:00	2013-06-19 15:29:58	2013-06-20 20:00:00	2.3996	37.6	0.4	2013-06-18 19:00:00	2013-06-20 19:45:00	2013-06-21 15:00:00	430.75	557	521	7.50837e+06
330	2013-08-01 08:00:00	2013-08-02 05:30:00	2013-08-02 20:00:00	4.09959	21.7	0	2013-08-01 09:00:00	2013-08-02 13:45:00	2013-08-04 22:00:00	196.5	237	204	4.63598e+06
331	2013-08-11 18:10:00	2013-08-11 18:40:00	2013-08-12 02:00:00	0.55	1.8	2.9	2013-08-11 22:00:00	2013-08-12 13:30:00	2013-08-13 23:00:00	184	220	192	2.26732e+06
332	2013-10-01 13:00:00	2013-10-01 18:29:59	2013-10-02	0.499994	2.5	26.3	2013-10-01 14:00:00	2013-10-01 14:30:00	2013-10-02 15:00:00	185.25	189	183.25	200871
333	2013-11-30 22:00:00	2013-12-01 10:30:02	2013-12-03 05:00:00	2.39975	25.5	0	2013-12-01 01:00:00	2013-12-02 08:45:00	2013-12-03 08:00:00	130.75	162	144	2.50917e+06
334	2013-12-31 06:00:00	2013-12-31 12:30:01	2013-12-31 17:00:00	0.299938	1.3	0	2013-12-31 07:00:00	2013-12-31 15:00:00	2013-12-31 22:00:00	121.25	126	122	70976.3
335	2014-01-02 06:00:00	2014-01-03 01:29:58	2014-01-04 05:00:00	1.59992	9.5	1.3	2014-01-02 09:00:00	2014-01-03 06:15:00	2014-01-04 15:00:00	115.5	144	122.5	1.25177e+06
336	2014-01-08 18:00:00	2014-01-09 04:11:27	2014-01-09 06:00:00	0.3	2.4	0.5	2014-01-08 18:00:00	2014-01-08 21:15:00	2014-01-09 08:00:00	123.5	128	124	102158
337	2014-01-09 23:00:00	2014-01-11 22:29:55	2014-01-12 06:00:00	1.29939	16.7	2.9	2014-01-10 11:00:00	2014-01-12 04:45:00	2014-01-12 11:00:00	123	149	138.5	688523
338	2014-03-06 15:00:00	2014-03-06 18:25:08	2014-03-07 02:00:00	0.4	2.4	52.4	2014-03-06 15:00:00	2014-03-07 04:30:00	2014-03-07 11:00:00	335	402	371	2003400
339	2014-03-08 14:00:00	2014-03-10 04:29:57	2014-03-10 19:00:00	3.39861	27.6	2.4	2014-03-08 20:00:00	2014-03-10 00:15:00	2014-03-11 20:00:00	333	1160	825	70496925
340	2014-03-14 08:00:00	2014-03-14 15:25:01	2014-03-14 20:00:00	0.7	4.2	27.6	2014-03-14 17:00:00	2014-03-15 00:15:00	2014-03-15 15:00:00	493.75	515	464	1.29501e+06
341	2014-03-16 23:00:00	2014-03-17 04:29:53	2014-03-17 13:00:00	1.59931	4.4	4.3	2014-03-16 23:00:00	2014-03-17 23:45:00	2014-03-18 15:00:00	467	557	498	5.81677e+06
342	2014-04-04 05:30:00	2014-04-05 03:15:50	2014-04-05 07:00:00	0.2	2.6	3.2	2014-04-04 06:00:00	2014-04-05 07:30:00	2014-04-05 17:00:00	392	427	417	613929
343	2014-04-08 06:30:00	2014-04-08 07:00:00	2014-04-08 12:00:00	0.111111	0.4	4.3	2014-04-08 07:00:00	2014-04-09 12:00:00	2014-04-13 17:00:00	577.5	1020	906	1.26058e+08
344	2014-04-09 03:10:00	2014-04-09 03:40:00	2014-04-09 05:00:00	0.55	0.9	4.7	2014-04-09 04:00:00	2014-04-10 04:00:00	2014-04-11 20:00:00	811.5	1210	1070	3.97829e+07
345	2014-04-28 02:20:00	2014-04-28 02:50:00	2014-04-28 04:00:00	0.233333	0.4	28.4	2014-04-28 02:35:00	2014-04-28 02:45:00	2014-04-28 12:00:00	1020	1020	999	214954
346	2014-05-16 10:00:00	2014-05-16 13:29:57	2014-05-16 14:00:00	0.199887	0.4	0	2014-05-16 10:00:00	2014-05-17 13:45:00	2014-05-20 10:00:00	1867.5	2180	1857.5	7.54954e+07
347	2014-06-03 05:05:00	2014-06-03 19:29:57	2014-06-03 21:00:00	3.69972	11.4	0	2014-06-03 07:00:00	2014-06-04 09:45:00	2014-06-04 23:00:00	1237.5	1350	1310	4543875
348	2014-10-21 04:00:00	2014-10-21 06:29:56	2014-10-21 13:00:00	1.5999	4.6	1.9	2014-10-21 08:00:00	2014-10-21 14:00:00	2014-10-22 09:00:00	159	162	159	118800
349	2014-10-23 01:00:00	2014-10-23 13:30:02	2014-10-23 23:00:00	2.29994	17.6	4.6	2014-10-23 05:00:00	2014-10-23 21:45:00	2014-10-26 09:00:00	159.75	217	173	5.64956e+06
350	2014-10-26 15:00:00	2014-10-26 15:30:00	2014-10-26 17:00:00	0.1	0.3	23.7	2014-10-26 21:00:00	2014-10-27 09:45:00	2014-10-27 12:00:00	170	175	167	139725
351	2014-10-27 20:00:00	2014-10-27 23:30:03	2014-10-28 01:00:00	0.1	0.4	19.4	2014-10-27 20:00:00	2014-10-29 00:45:00	2014-11-01 04:00:00	167	175	167	3177000
352	2014-10-28 10:30:00	2014-10-29 00:29:54	2014-10-29 15:00:00	1.29933	8.3	19.8	2014-10-28 22:00:00	2014-10-29 08:30:00	2014-11-01 04:00:00	166.5	184	167	3.24675e+06
353	2014-11-01 06:00:00	2014-11-01 18:30:02	2014-11-02 11:00:00	3.19993	34.8	9	2014-11-01 07:00:00	2014-11-02 16:30:00	2014-11-03 05:00:00	168.5	237	217	2.13177e+06
354	2014-11-06 10:12:00	2014-11-06 11:29:59	2014-11-07 05:00:00	1.49993	6	40.9	2014-11-06 11:00:00	2014-11-07 08:00:00	2014-11-07 17:00:00	201	220	214	341490
355	2014-11-09 05:10:00	2014-11-09 10:29:58	2014-11-10 01:00:00	1.99943	14.7	11.2	2014-11-09 08:00:00	2014-11-10 09:45:00	2014-11-11 03:00:00	203.25	244	233	2.74556e+06
356	2014-11-24 16:00:00	2014-11-28 18:30:02	2014-11-29 16:00:00	3.79919	55.8	13.3	2014-11-24 22:00:00	2014-11-29 10:30:00	2014-11-30 16:00:00	174.5	704	421.5	2.98056e+07
357	2014-12-04 07:00:00	2014-12-05 01:03:48	2014-12-05 10:00:00	0.3	3.6	0	2014-12-04 19:00:00	2014-12-05 18:30:00	2014-12-05 20:00:00	283	310	295	310248
358	2014-12-23 21:30:00	2014-12-24 22:29:56	2014-12-25 04:00:00	1.29942	13.9	16.7	2014-12-24	2014-12-24 18:15:00	2014-12-25 14:00:00	276	325	310	2.51582e+06
359	2015-02-09 05:05:27	2015-02-09 06:30:03	2015-02-09 20:00:00	10.4899	13	18.5	2015-02-09 06:00:00	2015-02-10 12:15:00	2015-02-11 23:00:00	859	1160	1070	2.88498e+07
360	2015-03-14 08:30:00	2015-03-15 14:30:01	2015-03-15 22:00:00	10.795	41.8	0	2015-03-14 11:00:00	2015-03-16 15:30:00	2015-03-19 21:00:00	387.5	1760	1120	2.09678e+08
361	2015-03-28 03:03:31	2015-03-28 06:30:04	2015-03-28 14:00:00	2.49931	7.3	5.9	2015-03-28 04:00:00	2015-03-29 07:30:00	2015-04-02 08:00:00	798	982	930	3.96905e+07
362	2015-05-13 04:20:00	2015-05-13 09:29:57	2015-05-13 17:00:00	2.1987	5	0.2	2015-05-13 05:00:00	2015-05-14 06:00:00	2015-05-14 18:00:00	487.25	522	510.5	1.45522e+06
363	2015-05-30 05:12:00	2015-05-30 14:31:33	2015-05-30 21:00:00	3.60788	12	11.6	2015-05-30 11:00:00	2015-05-30 19:30:00	2015-05-30 23:00:00	439.5	463	453.5	107888
364	2015-10-27	2015-10-27 00:30:00	2015-10-27 02:00:00	0.1	0.3	0.1	2015-10-27 00:15:00	2015-10-27 01:45:00	2015-10-28 08:00:00	121	121	118	144673
365	2015-10-30 00:30:00	2015-10-31 19:29:59	2015-11-01 01:00:00	4.9992	38.6	0.6	2015-10-30 10:00:00	2015-11-01 01:30:00	2015-11-01 13:00:00	124	177	160.5	1.07004e+06
366	2015-11-05 08:00:00	2015-11-05 12:58:38	2015-11-05 23:00:00	0.2	2	6.5	2015-11-05 17:00:00	2015-11-05 17:30:00	2015-11-06 06:00:00	125.5	127	124	76404.8
367	2015-11-08 06:00:00	2015-11-08 13:30:02	2015-11-08 15:00:00	0.199936	0.5	3.2	2015-11-09 06:00:00	2015-11-09 14:00:00	2015-11-11 15:00:00	121.75	133	130	2.17609e+06
368	2015-11-09 05:08:34	2015-11-09 14:30:01	2015-11-09 17:00:00	3.79861	19.7	2.5	2015-11-09 06:00:00	2015-11-09 23:45:00	2015-11-10 13:00:00	121.75	149	139	955640
369	2015-11-17 05:15:00	2015-11-17 21:29:59	2015-11-18	5.29967	21	5.7	2015-11-17 06:00:00	2015-11-18 01:00:00	2015-11-18 18:00:00	123.25	159	149	943684
370	2015-12-06 08:00:00	2015-12-09 03:30:01	2015-12-09 20:00:00	4.79884	62.7	5.9	2015-12-06 15:00:00	2015-12-09 19:00:00	2015-12-11 21:00:00	113.75	438	219	2.99992e+07
371	2016-02-11 22:00:00	2016-02-13 00:30:00	2016-02-17 05:00:00	1.89972	20.4	0.5	2016-02-11 23:00:00	2016-02-17 06:45:00	2016-02-20 12:00:00	149.75	571	463	5.52848e+07
372	2016-03-09 21:00:00	2016-03-10 11:29:58	2016-03-10 20:00:00	0.599922	5.6	2.1	2016-03-10 04:00:00	2016-03-11 09:30:00	2016-03-20 22:00:00	370.5	408	397.5	6.62816e+07
373	2016-03-11 18:00:00	2016-03-12 10:30:00	2016-03-12 20:00:00	1.09989	6.5	7	2016-03-11 18:00:00	2016-03-13 20:00:00	2016-03-17 05:00:00	403.5	509	482	2.18593e+07
374	2016-03-13 12:00:00	2016-03-13 18:30:01	2016-03-13 21:00:00	0.699938	4	12.1	2016-03-13 12:00:00	2016-03-14 12:30:00	2016-03-15 18:00:00	480.5	543	522	4.87614e+06
375	2016-04-04 05:15:00	2016-04-04 07:00:51	2016-04-04 17:00:00	0.4	2	0	2016-04-04 06:00:00	2016-04-05 01:15:00	2016-04-06 01:00:00	656.75	770	726	7.76752e+06
376	2016-04-05 07:00:00	2016-04-05 07:30:00	2016-04-05 09:00:00	0.1	0.3	2	2016-04-05 07:15:00	2016-04-05 07:15:00	2016-04-05 15:00:00	763	770	755	118234
377	2016-04-22 16:20:00	2016-04-22 19:30:01	2016-04-23 01:00:00	0.699968	2.8	0	2016-04-22 17:00:00	2016-04-23 22:45:00	2016-04-25 20:00:00	1257.5	1420	1320	23262375
378	2016-04-23 11:30:00	2016-04-23 15:30:01	2016-04-24 08:00:00	1.89942	9.8	2.8	2016-04-23 12:00:00	2016-04-24 18:00:00	2016-04-25 05:00:00	1327.5	1460	1417.5	6.16923e+06
379	2016-05-05 07:00:00	2016-05-06 02:30:40	2016-05-06 05:00:00	1.2	7.5	0	2016-05-05 08:00:00	2016-05-06 17:00:00	2016-05-08 03:00:00	863	975	946	8.8991e+06
380	2016-10-07 04:12:00	2016-10-07 07:30:02	2016-10-07 21:00:00	0.499882	3.3	1.8	2016-10-07 11:00:00	2016-10-07 16:30:00	2016-10-09 03:00:00	135.25	143	136	491063
381	2016-10-09	2016-10-10 05:29:58	2016-10-10 15:00:00	3.3996	29.4	6.7	2016-10-09 07:00:00	2016-10-10 13:00:00	2016-10-12 20:00:00	138.25	191	149	7.153e+06
382	2016-10-30 20:00:00	2016-10-30 21:30:01	2016-10-31 14:00:00	2.7992	8.8	18.3	2016-10-31 02:00:00	2016-11-01 06:00:00	2016-11-02 04:00:00	218	267	254	3310848
383	2016-11-15 00:30:00	2016-11-15 06:30:03	2016-11-16 05:00:00	1.2	9.9	5.1	2016-11-15 02:00:00	2016-11-16 14:15:00	2016-11-18 04:00:00	190	282	254	8.67031e+06
384	2017-01-07 20:00:00	2017-01-07 21:30:07	2017-01-08 03:00:00	0.2	1	0	2017-01-07 20:00:00	2017-01-08 14:15:00	2017-01-10 09:00:00	134.75	147	138.5	1.82198e+06
385	2017-01-08 17:00:00	2017-01-08 18:30:01	2017-01-09 17:00:00	0.999868	7.7	1	2017-01-09 14:00:00	2017-01-09 19:30:00	2017-01-09 21:00:00	149	160	153	71485.7
386	2017-02-08 11:00:00	2017-02-09 14:30:02	2017-02-10 02:00:00	2.69994	40	23	2017-02-08 13:00:00	2017-02-10 20:00:00	2017-02-12 16:00:00	142	379	253	2.84397e+07
387	2017-03-07 15:00:00	2017-03-07 22:51:16	2017-03-08 04:00:00	0.4	3.9	11.7	2017-03-07 17:00:00	2017-03-07 22:00:00	2017-03-08 07:00:00	252	262	258	203271
388	2017-03-16 10:00:00	2017-03-16 14:30:04	2017-03-16 16:00:00	0.1	0.4	23.6	2017-03-16 10:00:00	2017-03-16 16:15:00	2017-03-17 21:00:00	2350	2440	1927.5	1.35626e+07
389	2017-04-07 05:06:39	2017-04-07 07:29:58	2017-04-07 19:00:00	1.9996	10	2.1	2017-04-07 06:00:00	2017-04-08 15:15:00	2017-04-10 01:00:00	1307.5	1620	1500	3.15103e+07
390	2017-04-24 11:00:00	2017-04-24 11:30:00	2017-04-24 17:00:00	0.1	0.7	5.5	2017-04-24 11:00:00	2017-04-25 12:30:00	2017-04-25 14:00:00	1440	1470	1460	672833
391	2017-05-05 11:10:00	2017-05-05 19:34:14	2017-05-06	1.30237	3.9	2.1	2017-05-05 12:00:00	2017-05-06 20:30:00	2017-05-08 23:00:00	1550	2330	1780	1.11777e+08
392	2017-05-11 23:00:00	2017-05-11 23:30:00	2017-05-12 01:00:00	0.1	0.3	1.5	2017-05-11 23:00:00	2017-05-12 20:00:00	2017-05-13 13:00:00	1887.5	2180	2060	1.57632e+07
393	2017-10-18 13:00:00	2017-10-18 15:21:55	2017-10-18 20:00:00	0.6	2.4	0.6	2017-10-18 19:00:00	2017-10-18 19:15:00	2017-10-19 15:00:00	168.25	169	166.75	104676
394	2017-10-20 02:00:00	2017-10-20 14:29:56	2017-10-21 02:00:00	1.09965	5.8	3	2017-10-20 13:00:00	2017-10-21 03:00:00	2017-10-28 02:00:00	167.5	180	169	1.53197e+07
395	2017-10-21 18:00:00	2017-10-22 06:30:02	2017-10-22 10:00:00	3.99795	18.3	8.8	2017-10-22 01:00:00	2017-10-22 12:45:00	2017-10-24 07:00:00	177	271	195	7474725
396	2017-11-17 22:00:00	2017-11-17 22:30:00	2017-11-18 05:00:00	0.1	0.5	20.3	2017-11-17 22:15:00	2017-11-17 22:15:00	2017-11-18 10:00:00	180	180	177	4193.62
397	2017-11-21 13:00:00	2017-11-23 17:29:55	2017-11-23 20:00:00	4.89541	36.7	17.1	2017-11-21 16:00:00	2017-11-24 06:30:00	2017-11-26 14:00:00	198	893	444	8.35162e+07
398	2018-01-30 11:30:00	2018-01-30 13:29:58	2018-01-30 14:00:00	0.69983	1.1	12.2	2018-01-30 12:00:00	2018-01-31 04:45:00	2018-01-31 08:00:00	226	240	236	171225
399	2018-02-05 05:30:00	2018-02-05 08:28:59	2018-02-06 04:00:00	0.2	2.5	16.6	2018-02-05 06:00:00	2018-02-05 11:30:00	2018-02-06 05:00:00	778.75	813	791	1.66165e+06
400	2018-02-08 19:10:00	2018-02-08 22:29:56	2018-02-10 05:00:00	2.39929	7.3	16	2018-02-08 20:00:00	2018-02-09 03:30:00	2018-02-10 16:00:00	845.5	944	761	1.1728e+07
401	2018-04-18 09:30:00	2018-04-18 15:29:57	2018-04-18 16:00:00	0.11989	0.5	8.7	2018-04-18 09:45:00	2018-04-18 09:45:00	2018-04-18 19:00:00	1040	1040	991	88808.1
402	2018-04-28 17:20:00	2018-04-28 17:50:00	2018-04-28 19:00:00	0.233333	0.4	0	2018-04-28 20:00:00	2018-04-29 11:15:00	2018-04-29 13:00:00	2652.5	2690	2670	141651
403	2018-05-01 10:30:00	2018-05-01 12:42:00	2018-05-01 14:00:00	0.419976	0.8	1.8	2018-05-01 10:45:00	2018-05-01 10:45:00	2018-05-01 16:00:00	2130	2120	2077.5	20250
404	2018-05-06 19:02:36	2018-05-06 20:30:00	2018-05-07 14:00:00	5.49875	10.9	1	2018-05-06 20:00:00	2018-05-07 16:00:00	2018-05-09	2662.5	3240	2907.5	4.91275e+07
405	2018-05-11 05:20:00	2018-05-11 13:30:01	2018-05-11 16:00:00	0.29997	2.1	14.5	2018-05-11 05:35:00	2018-05-11 05:45:00	2018-05-13 05:00:00	2710	2700	2010	333.333
406	2018-05-16 15:05:27	2018-05-16 17:30:04	2018-05-16 21:00:00	3.19605	9.8	2.1	2018-05-16 17:00:00	2018-05-17 07:15:00	2018-05-20 18:00:00	2215	2440	1640	5.90759e+07
407	2018-11-02 06:06:39	2018-11-02 07:29:57	2018-11-02 17:00:00	1.69924	4.9	15.4	2018-11-02 09:00:00	2018-11-02 19:45:00	2018-11-02 21:00:00	185	194	191	31725
408	2018-11-04 16:06:39	2018-11-04 21:29:56	2018-11-04 22:00:00	1.39914	5	16.4	2018-11-04 23:00:00	2018-11-05 04:00:00	2018-11-05 19:00:00	193	202	198	336150
409	2018-11-24 15:00:00	2018-11-24 15:30:00	2018-11-25 05:00:00	0.1	0.5	4.8	2018-11-24 15:15:00	2018-11-24 15:15:00	2018-11-25 15:00:00	154	154	150	162379
410	2018-11-27 13:20:00	2018-11-27 14:30:04	2018-11-27 16:00:00	1.89865	3	6.2	2018-11-27 13:35:00	2018-11-27 15:45:00	2018-11-29 02:00:00	157	157	153	255625
411	2018-12-18 07:00:00	2018-12-18 16:29:58	2018-12-18 18:00:00	8.99674	11.8	4.6	2018-12-18 08:00:00	2018-12-19 03:00:00	2018-12-19 16:00:00	139	169	159	1.24166e+06
412	2018-12-30 16:03:31	2018-12-30 16:33:31	2018-12-30 18:00:00	1.62344	2.1	8.1	2018-12-30 16:18:31	2018-12-30 16:30:00	2018-12-30 22:00:00	155	155	151	31090.9
413	2019-01-02 12:30:00	2019-01-02 13:00:00	2019-01-02 15:00:00	0.2	0.6	8.4	2019-01-02 17:00:00	2019-01-02 20:00:00	2019-01-03 01:00:00	140	151	145	143691
414	2019-02-11 05:15:00	2019-02-11 23:30:01	2019-02-13 11:00:00	0.799699	13	0	2019-02-11 06:00:00	2019-02-12 06:30:00	2019-02-14 07:00:00	121.896	147	121	3.56675e+06
415	2019-02-22 21:00:00	2019-02-22 23:29:56	2019-02-23 05:00:00	0.199899	0.8	0	2019-02-22 21:00:00	2019-02-23 12:30:00	2019-02-27 18:00:00	106.073	119	85.4083	2.74093e+06
416	2019-04-08 11:00:00	2019-04-09 11:29:58	2019-04-09 12:00:00	14.0942	21	13.9	2019-04-09 03:00:00	2019-04-10 07:15:00	2019-04-11 19:00:00	516.5	788	717	1.87438e+07
417	2019-04-19 11:00:00	2019-04-19 11:30:00	2019-04-19 17:00:00	0.1	0.7	0.2	2019-04-19 11:00:00	2019-04-20 16:00:00	2019-04-30 09:00:00	577.5	887	795	310017825
418	2019-04-20 05:00:00	2019-04-20 12:30:26	2019-04-21 02:00:00	0.1	0.6	0.9	2019-04-20 05:00:00	2019-04-21 11:30:00	2019-04-29 23:00:00	771.75	1010	823	2.14531e+08
419	2019-05-16 00:10:00	2019-05-16 02:29:55	2019-05-16 03:00:00	1.99758	2.8	0	2019-05-16 04:00:00	2019-05-17 01:15:00	2019-05-20 13:00:00	1397.5	1490	1300	6.57916e+07
420	2019-05-17 09:00:00	2019-05-17 17:29:57	2019-05-18 14:00:00	1.09968	14.5	14.7	2019-05-17 09:00:00	2019-05-17 20:15:00	2019-05-20 13:00:00	1570	1680	1300	3.25845e+07
421	2019-05-24 05:30:00	2019-05-24 09:30:01	2019-05-25 03:00:00	0.499904	4.2	0	2019-05-24 05:45:00	2019-05-24 05:45:00	2019-05-25 05:00:00	887	887	866	228832
422	2019-05-25 23:20:00	2019-05-26 00:30:04	2019-05-27 01:00:00	2.69959	7.5	4.4	2019-05-26 02:00:00	2019-05-27 11:00:00	2019-05-28 19:00:00	862.5	1140	1060	2.13872e+07
423	2019-06-05 22:00:00	2019-06-05 22:30:00	2019-06-06 15:00:00	2.3	11.1	0	2019-06-06	2019-06-06 22:15:00	2019-06-07 19:00:00	753	831	774	6.19355e+06
424	2019-08-09 05:30:00	2019-08-09 12:35:23	2019-08-09 14:00:00	1.02704	3.4	0	2019-08-09 07:00:00	2019-08-09 16:30:00	2019-08-14 05:00:00	167	182	167	5.76e+06
425	2019-08-10 15:30:00	2019-08-10 18:29:59	2019-08-10 19:00:00	2.1964	3.2	3.4	2019-08-10 19:00:00	2019-08-11 16:00:00	2019-08-12 20:00:00	179	194	182	789093
426	2019-08-11 12:02:13	2019-08-11 12:32:13	2019-08-11 17:00:00	2.60168	3.5	6.6	2019-08-11 15:00:00	2019-08-11 20:15:00	2019-08-12 20:00:00	182	198	182	694800
427	2019-09-06 02:00:00	2019-09-06 06:29:58	2019-09-06 11:00:00	0.699767	1.5	0.1	2019-09-06 07:00:00	2019-09-06 10:45:00	2019-09-16 03:00:00	132	138	131	1.1614e+07
428	2019-09-09 14:03:19	2019-09-09 14:33:19	2019-09-09 18:00:00	1.82211	3.3	21.2	2019-09-09 16:00:00	2019-09-09 16:15:00	2019-09-10 17:00:00	166	167	163	215631
429	2019-10-05 02:15:00	2019-10-05 02:45:00	2019-10-05 11:00:00	0.303571	0.6	0	2019-10-05 09:00:00	2019-10-05 14:45:00	2019-10-06 10:00:00	151	155	151	153000
430	2019-10-07 21:12:00	2019-10-08 06:29:57	2019-10-08 09:00:00	2.29977	10.3	0.6	2019-10-08	2019-10-08 13:15:00	2019-10-10 21:00:00	147	214	160	6902550
431	2019-10-25 18:15:00	2019-10-25 19:29:59	2019-10-26 08:00:00	0.999898	3	2.3	2019-10-25 22:00:00	2019-10-26 09:45:00	2019-10-29 03:00:00	145.25	161	146	2.70821e+06
432	2019-11-12 10:00:00	2019-11-12 14:29:58	2019-11-12 16:00:00	1.59996	4.3	0.4	2019-11-12 12:00:00	2019-11-13	2019-11-13 02:00:00	122	131	128	124586
433	2019-11-15 14:08:34	2019-11-15 14:38:34	2019-11-15 16:00:00	0.642833	1	4.7	2019-11-15 18:00:00	2019-11-15 22:00:00	2019-11-16 06:00:00	128	131	128	40500
434	2019-11-17 07:10:00	2019-11-17 11:29:57	2019-11-17 12:00:00	2.69987	6.5	5.3	2019-11-17 09:00:00	2019-11-17 18:00:00	2019-11-18 08:00:00	127.25	145	138	631913
435	2019-11-19 01:12:00	2019-11-19 03:39:56	2019-11-20 01:00:00	0.53321	4.5	7.5	2019-11-19 04:00:00	2019-11-19 18:45:00	2019-11-20 08:00:00	139	145	142	282222
436	2019-11-29 15:12:00	2019-11-29 15:42:00	2019-11-29 17:00:00	0.42	0.6	1.1	2019-11-29 16:00:00	2019-11-30 17:00:00	2019-12-01 07:00:00	68.8344	95.6	72.35	2.63265e+06
437	2019-12-19 19:05:00	2019-12-19 20:30:00	2019-12-20 05:00:00	2.99971	12.7	0	2019-12-19 20:00:00	2019-12-20 23:15:00	2019-12-25 06:00:00	101.375	131	121	8.64332e+06
438	2019-12-20 15:20:00	2019-12-20 18:30:01	2019-12-20 20:00:00	4.09876	5.3	12.7	2019-12-20 20:00:00	2019-12-21 19:30:00	2019-12-23	126.5	138	135	904762
439	2019-12-31 09:00:00	2019-12-31 11:29:56	2020-01-01 12:00:00	1.5996	15.8	0	2019-12-31 09:00:00	2020-01-02 04:00:00	2020-01-02 18:00:00	109	149	138	2.16006e+06
440	2020-01-04 06:12:00	2020-01-04 07:29:59	2020-01-04 10:00:00	0.799979	2.4	17.1	2020-01-04 10:00:00	2020-01-04 12:30:00	2020-01-04 16:00:00	131	138	131	66600
441	2020-01-05 20:00:00	2020-01-07 07:29:59	2020-01-07 08:00:00	4.8	23.7	19.5	2020-01-06 06:00:00	2020-01-07 22:30:00	2020-01-09 01:00:00	122	160	149	2.49684e+06
442	2020-01-08 06:00:00	2020-01-08 13:29:56	2020-01-08 14:00:00	0.299794	1.1	26.1	2020-01-08 11:00:00	2020-01-08 11:45:00	2020-01-08 16:00:00	157.75	160	157	2126.25
443	2020-01-10 14:03:09	2020-01-10 18:33:01	2020-01-10 20:00:00	1.94952	7.8	24.8	2020-01-10 19:00:00	2020-01-11 19:00:00	2020-01-13 22:00:00	98	135	125	4187331
444	2020-01-11 04:00:00	2020-01-11 23:29:58	2020-01-12 05:00:00	0.199959	2.1	32.6	2020-01-11 06:00:00	2020-01-11 23:45:00	2020-01-12 16:00:00	109	145	135	1.21672e+06
445	2020-02-01 10:15:00	2020-02-01 15:29:58	2020-02-02 04:00:00	1.39969	8.8	10.1	2020-02-01 11:00:00	2020-02-02 07:45:00	2020-02-03 17:00:00	153	271	170	1.28691e+07
446	2020-05-19 17:15:00	2020-05-19 18:29:59	2020-05-19 19:00:00	2.19969	2.6	12.5	2020-05-19 18:00:00	2020-05-20 18:45:00	2020-05-24 21:00:00	1187.5	1330	1220	1.03362e+08
447	2020-05-20 04:03:00	2020-05-20 18:30:52	2020-05-20 21:00:00	6.73146	17.4	15.1	2020-05-20 06:00:00	2020-05-21 20:00:00	2020-05-24 02:00:00	1192.5	1670	1340	7.77172e+07
448	2020-05-21 05:10:00	2020-05-21 05:40:00	2020-05-21 14:00:00	0.533333	1.1	23	2020-05-21 06:00:00	2020-05-22 00:45:00	2020-05-24 02:00:00	1515	1690	1340	3.30868e+07
449	2020-05-30 22:01:39	2020-05-31 06:30:42	2020-05-31 08:00:00	8.2248	14.5	1.4	2020-05-30 23:00:00	2020-05-31 21:15:00	2020-06-02 09:00:00	1270	1510	1190	31005000
