# Supplementary material for: Leveraging a time-series event separation method to disentangle time-varying hydrologic controls on streamflow – application to wildfire-affected catchments
Source: Copernicus journal article supplement (doi:10.5194/hess-29-27-2025), 2025-01-03
Supplement: Supplementary file 9 [file ValleyCreek_EventAttributes.xlsx]

## Sheet: Events_Sorting - Copy
	storm_start	storm_peak	storm_end	storm_peak_60int_mm/hr	storm_depth_mm	antPrecip_mm	flow_start	flow_peak	flow_end	flow_start_mag_cfs	flow_peak_mag_cfs	flow_end_mag_cfs	volume_ft3
1	1992-10-02 11:30:00	1992-10-02 13:29:58	1992-10-02 16:00:00	0.399932	1.4	0	1992-10-02 23:00:00	1992-10-03 04:25:00	1992-10-09 10:00:00	53	56	52	3.88305e+06
2	1992-10-03	1992-10-03 06:30:01	1992-10-04 17:00:00	0.699907	8.1	1.4	1992-10-03	1992-10-03 23:54:00	1992-10-05 17:00:00	53.75	80	59	2.11353e+06
3	1992-11-05 05:30:00	1992-11-05 06:00:00	1992-11-05 14:00:00	0.15	0.5	17.1	1992-11-05 12:00:00	1992-11-05 17:30:00	1992-11-06 04:00:00	64.25	70	45	569812
4	1992-11-07 01:30:00	1992-11-07 14:30:05	1992-11-07 21:00:00	0.999834	4.4	1.1	1992-11-07 13:00:00	1992-11-07 18:30:00	1992-11-08 06:00:00	63.625	70	68	183827
5	1992-11-08 10:00:00	1992-11-08 21:30:01	1992-11-09 05:00:00	0.4	4.4	5.5	1992-11-08 20:00:00	1992-11-08 21:00:00	1992-11-09 09:00:00	68.25	70	63.625	75026.7
6	1992-11-12 01:00:00	1992-11-12 01:30:00	1992-11-12 08:00:00	0.2	0.6	9	1992-11-12 02:00:00	1992-11-12 16:00:00	1992-11-12 21:00:00	56.125	70	64	188137
7	1992-12-08 13:00:00	1992-12-09 00:30:01	1992-12-09 11:00:00	0.699971	6.7	3.4	1992-12-08 13:15:00	1992-12-10	1992-12-10 14:00:00	72	72	69	64237.5
8	1992-12-19 13:00:00	1992-12-20 04:16:16	1992-12-22 06:00:00	0.3	8.3	8.5	1992-12-19 13:15:00	1992-12-22	1992-12-22 07:00:00	70	70	67.25	1928.57
9	1992-12-28 15:00:00	1992-12-28 19:30:04	1992-12-30 13:00:00	0.999865	13.4	21.6	1992-12-29 07:00:00	1992-12-31 05:30:00	1992-12-31 13:00:00	67	76	63.125	719349
10	1993-02-09	1993-02-09 07:30:02	1993-02-10 06:00:00	2.99962	25.7	0.6	1993-02-09 13:00:00	1993-02-10 21:44:00	1993-02-11 08:00:00	70.125	92	63.375	290896
11	1993-03-19 21:00:00	1993-03-20 04:30:02	1993-03-20 19:00:00	1.89897	7.3	40.5	1993-03-20 04:00:00	1993-03-21 15:29:00	1993-03-21 21:00:00	84.75	123	94	760913
12	1993-04-03 06:00:00	1993-04-04 18:30:00	1993-04-04 21:00:00	2.69973	25.7	10.1	1993-04-03 15:00:00	1993-04-04 19:23:00	1993-04-05 08:00:00	118.75	181	150.875	2.42879e+06
13	1993-04-26 02:00:00	1993-04-26 06:30:04	1993-04-26 17:00:00	0.2	1.4	11.2	1993-04-26 11:00:00	1993-04-26 17:30:00	1993-04-27 08:00:00	161.25	194	152	1.41552e+06
14	1993-04-29 02:00:00	1993-04-29 16:29:58	1993-04-29 20:00:00	0.499961	4.4	4.9	1993-04-29 11:00:00	1993-04-29 21:00:00	1993-04-30 10:00:00	201.375	287	217	2.60658e+06
15	1993-04-30 04:00:00	1993-04-30 08:58:38	1993-04-30 13:00:00	0.2	1.2	6.3	1993-04-30 12:00:00	1993-04-30 20:30:00	1993-05-01 10:00:00	219.5	267	197	1.79844e+06
16	1993-05-02 05:02:13	1993-05-02 05:32:13	1993-05-02 07:00:00	2.62588	3.4	5.6	1993-05-02 12:00:00	1993-05-02 19:30:00	1993-05-03 10:00:00	260.875	551	299	9.26279e+06
17	1993-05-25 16:30:00	1993-05-25 17:30:03	1993-05-25 23:00:00	0.9997	3.1	2	1993-05-25 20:00:00	1993-05-26 11:00:00	1993-05-28 22:00:00	737	879	837	1.79796e+07
18	1993-05-29	1993-05-29 00:30:00	1993-05-29 03:00:00	0.1	0.4	3.1	1993-05-29 02:00:00	1993-05-29 10:00:00	1993-05-29 23:00:00	837.875	879	816	1.83279e+06
19	1993-05-30 20:00:00	1993-05-30 20:30:00	1993-05-30 22:00:00	0.1	0.3	3.5	1993-05-31 02:00:00	1993-05-31 08:30:00	1993-05-31 19:00:00	779.5	809	769	1.16517e+06
20	1993-06-01 06:20:00	1993-06-01 06:50:00	1993-06-01 08:00:00	0.3	0.6	2.9	1993-06-01 07:00:00	1993-06-01 12:30:00	1993-06-01 22:00:00	842.25	871	837	987345
21	1993-06-04 10:00:00	1993-06-04 18:38:22	1993-06-04 22:00:00	0.4	3.2	21.1	1993-06-04 10:15:00	1993-06-04 10:15:00	1993-06-05 03:00:00	789	786	680	4714.93
22	1993-06-05 07:00:00	1993-06-07 01:30:01	1993-06-08 16:00:00	2.1999	39.2	24.3	1993-06-06	1993-06-07 07:30:00	1993-06-09 02:00:00	653.75	1020	680	4.14411e+07
23	1993-06-10 02:00:00	1993-06-10 11:29:58	1993-06-12	1.49957	15.7	42.4	1993-06-10 03:00:00	1993-06-11 19:30:00	1993-06-13 04:00:00	617.75	900	620	2.9827e+07
24	1993-06-14 19:06:39	1993-06-15 16:29:57	1993-06-16 16:00:00	1.59983	13.7	15.7	1993-06-15	1993-06-16 17:30:00	1993-06-17 08:00:00	538.125	674	626	6.41353e+06
25	1993-06-19 23:00:00	1993-06-19 23:30:00	1993-06-20 02:00:00	0.2	0.6	13.7	1993-06-19 23:00:00	1993-06-21 01:30:00	1993-06-24 01:00:00	597	693	568.625	4.77851e+07
26	1993-06-20 10:30:00	1993-06-20 11:30:03	1993-06-20 16:00:00	0.3999	1.5	14.3	1993-06-20 11:00:00	1993-06-21 16:00:00	1993-06-24 01:00:00	662	750	568.625	3.57072e+07
27	1993-06-21 12:00:00	1993-06-21 13:30:01	1993-06-22 07:00:00	1.59977	7.4	2.1	1993-06-21 12:00:00	1993-06-22 09:00:00	1993-06-24 01:00:00	730	851	568.625	2.15571e+07
28	1993-06-27 16:30:00	1993-06-27 19:29:59	1993-06-27 23:00:00	0.799997	3.2	0	1993-06-27 19:00:00	1993-06-28 12:30:00	1993-06-29 10:00:00	503.625	574	551	3.82475e+06
29	1993-07-01 06:00:00	1993-07-02 09:30:02	1993-07-03 15:00:00	0.3	7.1	3.2	1993-07-02 08:00:00	1993-07-03 03:00:00	1993-07-04 02:00:00	406.125	487	422	5.03622e+06
30	1993-07-21 06:15:00	1993-07-21 08:30:00	1993-07-21 11:00:00	0.999968	3.2	8.3	1993-07-21 07:00:00	1993-07-21 12:00:00	1993-07-22 08:00:00	216.375	245	221.375	1065960
31	1993-07-22 04:00:00	1993-07-23 05:29:59	1993-07-23 19:00:00	1.19998	13.1	11.1	1993-07-22 09:00:00	1993-07-23 18:30:00	1993-07-24 18:00:00	224	245	221	2.0547e+06
32	1993-07-24 12:00:00	1993-07-24 12:30:00	1993-07-24 17:00:00	0.1	0.6	19.7	1993-07-24 12:15:00	1993-07-24 12:15:00	1993-07-24 18:00:00	231	231	221	23047.8
33	1993-07-25 13:00:00	1993-07-26 05:30:12	1993-07-26 11:00:00	0.6	5.1	20.3	1993-07-26 03:00:00	1993-07-26 16:30:00	1993-07-27 20:00:00	205.875	271	221	5.22599e+06
34	1994-10-21 08:00:00	1994-10-21 08:30:00	1994-10-21 14:00:00	0.1	0.5	2.4	1994-10-21 08:00:00	1994-10-21 19:20:00	1994-10-22 01:00:00	52.875	54	53	22106.2
35	1994-10-27 20:00:00	1994-10-28 01:29:53	1994-10-28 18:00:00	3.59848	27.6	3.6	1994-10-27 20:00:00	1994-10-28 06:12:00	1994-10-29 10:00:00	71.75	161	86	5.88676e+06
36	1994-10-30 15:00:00	1994-10-30 15:30:00	1994-10-30 17:00:00	0.1	0.3	31.2	1994-10-30 15:00:00	1994-10-30 17:09:00	1994-10-31 02:00:00	72.25	78	66	175500
37	1994-11-01	1994-11-01 01:30:13	1994-11-01 16:00:00	1.5	13.2	35.2	1994-11-01	1994-11-01 11:07:00	1994-11-02 08:00:00	81.8	115	53.5	2705715
38	1994-11-04 15:00:00	1994-11-04 23:30:03	1994-11-05 14:00:00	0.4	6.1	17.2	1994-11-04 15:00:00	1994-11-04 17:03:00	1994-11-05 15:00:00	79.25	84	69.5	41627.4
39	1994-11-05 23:00:00	1994-11-06 04:29:59	1994-11-07 03:00:00	0.599998	7.3	23	1994-11-06 17:00:00	1994-11-07 14:30:00	1994-11-07 17:00:00	68.25	72	66	132616
40	1994-11-07 13:00:00	1994-11-07 13:30:00	1994-11-07 16:00:00	0.1	0.4	13.4	1994-11-07 13:00:00	1994-11-08 15:30:00	1994-11-08 22:00:00	67.5	76	54	452905
41	1994-11-08 22:00:00	1994-11-09 00:30:02	1994-11-10 15:00:00	1.39993	15.1	13.8	1994-11-08 23:00:00	1994-11-09 14:00:00	1994-11-11 11:00:00	54.25	72	66	1.65309e+06
42	1994-11-23 23:00:00	1994-11-25 09:29:58	1994-11-26 01:00:00	1.49986	17.6	5.5	1994-11-23 23:15:00	1994-11-25	1994-11-26 02:00:00	80	80	78	19886.5
43	1994-12-16 01:30:00	1994-12-17 06:30:00	1994-12-17 12:00:00	1.09991	12.7	6.1	1994-12-17 09:00:00	1994-12-17 16:30:00	1994-12-17 23:00:00	81.25	86	74.25	170888
44	1995-01-29 13:00:00	1995-01-29 13:30:00	1995-01-29 17:00:00	0.1	0.5	14.4	1995-01-29 13:00:00	1995-01-29 16:43:00	1995-01-29 22:00:00	69.5	76	66	134460
45	1995-01-30 10:00:00	1995-02-01 09:30:01	1995-02-02 03:00:00	3.49989	44.9	14.9	1995-01-30 11:00:00	1995-02-02 16:30:00	1995-02-07 05:00:00	66	118	103	1.53461e+07
46	1995-03-17 06:00:00	1995-03-18 10:30:03	1995-03-19 14:00:00	0.999731	11.2	14.4	1995-03-17 09:00:00	1995-03-17 15:30:00	1995-03-19 15:00:00	108.5	136	113	2.06282e+06
47	1995-03-19 23:00:00	1995-03-20 18:29:58	1995-03-21 09:00:00	0.599959	8.1	22.6	1995-03-20 14:00:00	1995-03-20 23:15:00	1995-03-21 23:00:00	108.5	141	130	1.78626e+06
48	1995-04-04 15:30:00	1995-04-05 02:29:57	1995-04-05 05:00:00	2.39915	9.1	0	1995-04-04 16:00:00	1995-04-06 04:15:00	1995-04-09 09:00:00	132.25	231	201	2.83874e+07
49	1995-04-05 12:10:00	1995-04-06 03:29:58	1995-04-06 19:00:00	2.79924	26.4	9.1	1995-04-05 13:00:00	1995-04-07 18:30:00	1995-04-08 14:00:00	157.25	328	260	1.35958e+07
50	1995-04-09 02:00:00	1995-04-09 04:30:02	1995-04-09 09:00:00	0.199934	0.9	48.5	1995-04-09 02:15:00	1995-04-09 02:15:00	1995-04-09 10:00:00	228	228	201	8796.77
51	1995-05-02 12:00:00	1995-05-02 12:30:00	1995-05-02 21:00:00	0.1	1	29.2	1995-05-02 13:00:00	1995-05-02 21:15:00	1995-05-03 13:00:00	262	328	261	2885850
52	1995-05-04 11:00:00	1995-05-04 21:51:02	1995-05-05 03:00:00	0.7	3.5	19	1995-05-04 12:00:00	1995-05-06 03:00:00	1995-05-07 13:00:00	264	394	360	1.62837e+07
53	1995-05-06 01:00:00	1995-05-06 03:30:02	1995-05-08 02:00:00	1.49993	17.5	23.1	1995-05-06 02:00:00	1995-05-06 18:15:00	1995-05-08 14:00:00	388	608	336	9.96542e+06
54	1995-05-08 12:00:00	1995-05-08 15:29:57	1995-05-08 20:00:00	0.299932	1.4	32.9	1995-05-08 15:00:00	1995-05-09	1995-05-09 12:00:00	337	427	371	2.89009e+06
55	1995-05-09 18:00:00	1995-05-09 18:30:00	1995-05-09 20:00:00	0.1	0.3	34.3	1995-05-09 18:00:00	1995-05-09 22:45:00	1995-05-10 11:00:00	389.25	413	385	937012
56	1995-05-10 04:00:00	1995-05-11 03:30:15	1995-05-12 05:00:00	0.3	6.2	34.6	1995-05-10 15:00:00	1995-05-11 22:45:00	1995-05-12 18:00:00	389	524	432	8.67773e+06
57	1995-05-12 14:00:00	1995-05-12 14:30:00	1995-05-12 17:00:00	0.1	0.4	7.9	1995-05-12 14:15:00	1995-05-12 14:15:00	1995-05-12 18:00:00	447	442	432	900
58	1995-05-26 11:00:00	1995-05-26 11:30:00	1995-05-26 16:00:00	0.1	0.6	0.7	1995-05-26 11:15:00	1995-05-26 11:15:00	1995-05-26 23:00:00	614	614	585	218432
59	1995-05-30 09:20:00	1995-05-30 11:29:59	1995-05-30 17:00:00	1.5	6	1	1995-05-30 13:00:00	1995-05-31 07:30:00	1995-05-31 19:00:00	675.5	756	724	2.38271e+06
60	1995-05-31 12:00:00	1995-05-31 12:30:00	1995-05-31 18:00:00	0.2	1	7	1995-05-31 21:00:00	1995-06-01 08:30:00	1995-06-01 15:00:00	727.5	770	756	748088
61	1995-06-01 10:00:00	1995-06-01 11:30:01	1995-06-01 17:00:00	0.399934	1.2	7.6	1995-06-01 18:00:00	1995-06-02 14:30:00	1995-06-07 21:00:00	756	830	743	7.55636e+07
62	1995-06-02 03:30:00	1995-06-03 04:30:02	1995-06-03 10:00:00	0.999543	6.6	8.2	1995-06-02 04:00:00	1995-06-03 12:45:00	1995-06-07 21:00:00	786	893	743	67682250
63	1995-06-04 11:00:00	1995-06-04 12:30:07	1995-06-04 15:00:00	0.2	0.7	14.8	1995-06-05	1995-06-05 14:30:00	1995-06-07 21:00:00	879	995	743	3.26641e+07
64	1995-06-04 23:30:00	1995-06-06 01:30:03	1995-06-06 20:00:00	0.999908	13.5	15.5	1995-06-05	1995-06-06 00:15:00	1995-06-07 21:00:00	879	1070	743	3.26641e+07
65	1995-06-07 17:00:00	1995-06-07 18:30:01	1995-06-08 03:00:00	0.699835	1.6	20.8	1995-06-07 17:15:00	1995-06-07 17:15:00	1995-06-08 07:00:00	770	770	705	3600
66	1995-06-08 14:00:00	1995-06-08 22:30:03	1995-06-09 19:00:00	0.4	7.3	15.8	1995-06-08 20:00:00	1995-06-09 07:45:00	1995-06-10 23:00:00	672.5	763	552	9.4096e+06
67	1995-06-16 10:15:00	1995-06-16 11:30:05	1995-06-16 18:00:00	1.89909	6.6	0.2	1995-06-16 16:00:00	1995-06-17 09:15:00	1995-06-17 19:00:00	792.5	865	837	2.10862e+06
68	1995-06-17 08:00:00	1995-06-19 06:27:12	1995-06-19 15:00:00	1.9	18.6	6.8	1995-06-17 08:00:00	1995-06-19 07:15:00	1995-06-21 03:00:00	858	1000	686	3.20639e+07
69	1995-06-22 06:00:00	1995-06-22 09:49:23	1995-06-22 17:00:00	0.4	2.5	32.2	1995-06-22 06:15:00	1995-06-22 06:15:00	1995-06-23 02:00:00	668	668	632	60151.9
70	1995-06-26 18:15:00	1995-06-26 19:30:05	1995-06-26 22:00:00	1.89864	3.4	9.5	1995-06-26 19:00:00	1995-06-27 21:45:00	1995-06-29 02:00:00	700.5	886	823	1.81859e+07
71	1995-07-02 12:20:00	1995-07-02 15:30:01	1995-07-03 07:00:00	1.19981	5	3.4	1995-07-02 22:00:00	1995-07-03 09:45:00	1995-07-03 21:00:00	687.75	731	693	2.10919e+06
72	1995-07-09 20:00:00	1995-07-09 22:29:56	1995-07-10 07:00:00	1.5999	5.7	4	1995-07-09 23:00:00	1995-07-09 23:15:00	1995-07-10 09:00:00	764.75	770	756	32681.3
73	1995-08-22 16:00:00	1995-08-22 19:29:57	1995-08-23	4.39879	14.3	0.5	1995-08-22 17:00:00	1995-08-23 01:45:00	1995-08-25 16:00:00	106	210	128	1.02385e+07
74	1995-10-03 02:30:00	1995-10-03 11:30:01	1995-10-04 14:00:00	1.39973	9.8	0.3	1995-10-03 06:00:00	1995-10-03 22:15:00	1995-10-05 20:00:00	89.5	152	103	5519925
75	1995-10-09 10:30:00	1995-10-09 11:29:57	1995-10-09 12:00:00	0.299933	0.5	1	1995-10-09 10:45:00	1995-10-09 10:45:00	1995-10-10	97	97	94	59909.4
76	1995-10-11 20:00:00	1995-10-11 23:11:43	1995-10-12 14:00:00	0.8	5.2	1.5	1995-10-11 22:00:00	1995-10-12 10:00:00	1995-10-13 14:00:00	99.5	141	108	2.91412e+06
77	1995-10-17 13:20:00	1995-10-17 21:30:01	1995-10-18 11:00:00	4.09957	11.9	5.2	1995-10-17 19:00:00	1995-10-18 09:30:00	1995-10-19 17:00:00	93	166	110	5.34023e+06
78	1995-11-05 06:00:00	1995-11-05 17:20:17	1995-11-05 20:00:00	0.2	1.4	0	1995-11-05 06:15:00	1995-11-05 06:15:00	1995-11-06 03:00:00	80	80	78	56298.8
79	1995-11-09 13:00:00	1995-11-09 23:29:59	1995-11-10 06:00:00	0.699996	6.5	39.2	1995-11-09 13:15:00	1995-11-09 13:15:00	1995-11-10 12:00:00	217	214	99	90514.3
80	1995-11-10 20:00:00	1995-11-11 19:30:03	1995-11-12 04:00:00	9.49806	64.9	45.7	1995-11-10 20:00:00	1995-11-12 05:30:00	1995-11-13 12:00:00	117.25	380	214.75	2.04767e+07
81	1995-11-23 16:00:00	1995-11-24 14:29:56	1995-11-24 19:00:00	2.29932	13.5	0.6	1995-11-23 16:00:00	1995-11-25 19:00:00	1995-11-27 08:00:00	112.25	214	128	1.20697e+07
82	1995-11-25 02:00:00	1995-11-25 22:30:05	1995-11-27 09:00:00	1.2	22.1	13.5	1995-11-25 10:00:00	1995-11-25 21:15:00	1995-11-27 23:00:00	153.5	231	144	5.28347e+06
83	1995-11-27 17:00:00	1995-11-28 12:30:04	1995-11-29 09:00:00	0.999746	13.7	35.6	1995-11-27 17:00:00	1995-11-30 09:00:00	1995-12-03 10:00:00	154.25	340	201.75	5.86852e+07
84	1995-11-29 18:20:00	1995-12-01 08:30:00	1995-12-02 05:00:00	3.79996	66.4	35.8	1995-11-29 19:00:00	1995-12-01 16:15:00	1995-12-02 11:00:00	169.75	686	336	3.53051e+07
85	1995-12-05 09:00:00	1995-12-05 13:29:58	1995-12-05 21:00:00	0.999895	5.9	75.3	1995-12-05 09:00:00	1995-12-05 23:45:00	1995-12-10 13:00:00	108	158	144.5	1.45673e+06
86	1995-12-08 23:00:00	1995-12-09 14:41:49	1995-12-09 22:00:00	0.4	3.4	15.1	1995-12-08 23:15:00	1995-12-10 00:45:00	1995-12-10 09:00:00	149	152	146	96225
87	1995-12-10 18:00:00	1995-12-12 03:30:03	1995-12-13 05:00:00	2.79991	61.7	9.6	1995-12-10 23:00:00	1995-12-12 19:30:00	1995-12-13 11:00:00	151.25	482	328	7.91607e+06
88	1996-02-05 04:04:36	1996-02-05 09:29:59	1996-02-08 11:00:00	2.79971	51.3	3.5	1996-02-06 12:00:00	1996-02-07 20:00:00	1996-02-08 12:00:00	144.5	197	176.75	1.46586e+06
89	1996-04-03 13:00:00	1996-04-03 13:30:00	1996-04-03 18:00:00	0.1	0.6	5	1996-04-03 13:00:00	1996-04-04 17:45:00	1996-04-05 05:00:00	110.75	123	118	420204
90	1996-04-08 17:00:00	1996-04-08 18:30:01	1996-04-08 20:00:00	0.199967	0.5	0.6	1996-04-08 17:00:00	1996-04-09 18:45:00	1996-04-11 10:00:00	239	323	291	6099660
91	1996-04-09 12:30:00	1996-04-09 14:29:58	1996-04-09 20:00:00	0.299966	1.3	1.1	1996-04-09 13:00:00	1996-04-10 18:15:00	1996-04-11 10:00:00	248	332	291	6428465
92	1996-04-19 20:00:00	1996-04-20 06:09:27	1996-04-20 19:00:00	0.6	7.1	16.9	1996-04-19 20:15:00	1996-04-19 20:15:00	1996-04-20 21:00:00	245	245	221	13554.5
93	1996-04-21 14:00:00	1996-04-22 00:29:59	1996-04-22 04:00:00	0.199996	1.2	24	1996-04-21 14:00:00	1996-04-21 15:15:00	1996-04-22 07:00:00	225	235	210	297847
94	1996-04-25 22:30:00	1996-04-26 05:29:58	1996-04-26 06:00:00	1.4995	3.4	33.3	1996-04-26 02:00:00	1996-04-26 18:15:00	1996-04-27 07:00:00	438.25	552	442	4.06172e+06
95	1996-05-13 13:00:00	1996-05-13 15:29:56	1996-05-13 17:00:00	1.1996	2.8	1.1	1996-05-13 14:00:00	1996-05-14 17:00:00	1996-05-21 15:00:00	639.5	1030	858	3.03019e+08
96	1996-05-14 02:00:00	1996-05-15 04:29:54	1996-05-19 18:00:00	3.49756	66.5	3.9	1996-05-14 02:00:00	1996-05-18 03:45:00	1996-05-19 20:00:00	810	1740	1115	1.61674e+08
97	1996-05-24	1996-05-24 08:29:57	1996-05-24 14:00:00	0.19993	0.9	5.3	1996-05-24 00:15:00	1996-05-24 00:15:00	1996-05-24 17:00:00	731	731	674	96340.3
98	1996-05-25 08:00:00	1996-05-25 09:30:01	1996-05-25 20:00:00	0.299967	1.2	6.8	1996-05-25 17:00:00	1996-05-26 04:45:00	1996-05-26 17:00:00	650	756	706.5	3.55805e+06
99	1996-05-27 05:20:00	1996-05-28 05:30:02	1996-05-28 14:00:00	1.39954	12.2	7.6	1996-05-27 17:00:00	1996-05-28 06:15:00	1996-05-28 20:00:00	759.5	1030	925	8.80304e+06
100	1996-06-15 06:00:00	1996-06-15 09:00:05	1996-06-15 11:00:00	0.2	0.6	0	1996-06-15 06:00:00	1996-06-16 09:30:00	1996-06-16 19:00:00	1220	1290	1240	2.39546e+06
101	1996-06-16 18:00:00	1996-06-16 22:29:58	1996-06-16 23:00:00	0.404595	0.6	0.7	1996-06-16 23:00:00	1996-06-17 09:00:00	1996-06-17 18:00:00	1235	1290	1260	1.341e+06
102	1996-10-15 01:30:00	1996-10-15 03:29:58	1996-10-15 10:00:00	0.199966	1.1	0.9	1996-10-15 13:00:00	1996-10-15 22:30:00	1996-10-16 09:00:00	104.5	108	103	153551
103	1996-10-18 08:00:00	1996-10-18 09:30:13	1996-10-18 23:00:00	0.3	2.1	2	1996-10-18 13:00:00	1996-10-18 20:30:00	1996-10-19 12:00:00	109.5	120	110	556875
104	1996-10-19 13:00:00	1996-10-19 13:30:00	1996-10-19 17:00:00	0.1	0.5	4.1	1996-10-19 15:00:00	1996-10-19 17:00:00	1996-10-20 08:00:00	113	118	70	624957
105	1996-10-22 04:07:30	1996-10-22 04:37:30	1996-10-22 15:00:00	0.702083	1.2	2.7	1996-10-22 12:00:00	1996-10-23 13:30:00	1996-10-26 08:00:00	103.75	118	107	5.25816e+06
106	1996-10-22 23:00:00	1996-10-22 23:30:00	1996-10-23 03:00:00	0.1	0.5	3.9	1996-10-23 12:00:00	1996-10-23 15:15:00	1996-10-26 08:00:00	113.5	120	107	3.48451e+06
107	1996-10-24	1996-10-24 05:29:59	1996-10-24 13:00:00	0.799992	4.1	4.4	1996-10-24 06:00:00	1996-10-24 16:30:00	1996-10-25 13:00:00	118.5	138	120	1.22156e+06
108	1996-10-24 21:30:00	1996-10-24 23:29:58	1996-10-25 19:00:00	0.699966	3.6	6.4	1996-10-24 22:00:00	1996-10-24 22:45:00	1996-10-26	136.5	138	120	94275
109	1996-11-15 14:00:00	1996-11-15 14:30:00	1996-11-15 16:00:00	0.1	0.3	0	1996-11-15 14:00:00	1996-11-15 18:45:00	1996-11-16 02:00:00	89.5	113	63.75	825075
110	1996-11-17 12:00:00	1996-11-18 19:30:00	1996-11-20 05:00:00	1.19998	32.5	0.3	1996-11-17 12:00:00	1996-11-20 03:15:00	1996-11-22 11:00:00	89.5	929	249	1.16067e+08
111	1996-12-07 11:00:00	1996-12-07 15:29:58	1996-12-08 16:00:00	1.89996	24.9	38.4	1996-12-07 11:00:00	1996-12-09 15:30:00	1996-12-12 23:00:00	109	149	118	1.38583e+07
112	1996-12-08 23:00:00	1996-12-09 23:30:04	1996-12-11 09:00:00	2.39989	40.5	63.3	1996-12-09 05:00:00	1996-12-10 15:00:00	1996-12-11 14:00:00	129.5	178	155	3.32819e+06
113	1997-01-28 02:00:00	1997-01-28 07:30:05	1997-01-28 11:00:00	0.4	2.5	34.4	1997-01-28 02:00:00	1997-01-28 16:00:00	1997-01-29 02:00:00	138	172	133	1.2317e+06
114	1997-01-30 23:00:00	1997-01-31 06:19:49	1997-02-01 13:00:00	1	17.8	36.5	1997-01-31 03:00:00	1997-01-31 20:00:00	1997-02-02 04:00:00	131.5	182	137	5.3098e+06
115	1997-04-23	1997-04-23 02:30:26	1997-04-24 21:00:00	0.6	6.4	21.8	1997-04-24 12:00:00	1997-04-25 19:30:00	1997-04-26 08:00:00	386	620	464.5	9.09487e+06
116	1997-05-31 05:30:00	1997-05-31 12:29:58	1997-05-31 18:00:00	1.89996	7.9	0.1	1997-05-31 06:00:00	1997-06-01 10:45:00	1997-06-02 23:00:00	1030	1280	1180	2.47666e+07
117	1997-06-03 14:00:00	1997-06-03 21:30:02	1997-06-03 23:00:00	0.299936	1.1	7.9	1997-06-03 21:00:00	1997-06-04 23:00:00	1997-06-06 22:00:00	1155	1330	1240	2.64265e+07
118	1997-06-07 18:00:00	1997-06-07 22:29:58	1997-06-08 01:00:00	0.299965	1.2	15.3	1997-06-07 21:00:00	1997-06-08 09:15:00	1997-06-08 19:00:00	1197.5	1280	1240	2.49188e+06
119	1997-06-09 06:00:00	1997-06-10 13:30:00	1997-06-11 05:00:00	3.19983	21.1	16.6	1997-06-09 06:00:00	1997-06-10 22:45:00	1997-06-11 23:00:00	1262.5	1760	1457.5	27523575
120	1997-06-17 12:00:00	1997-06-17 15:30:03	1997-06-17 20:00:00	2.39921	9.8	15.6	1997-06-17 18:00:00	1997-06-18 12:00:00	1997-06-19 02:00:00	1182.5	1320	1260	5.27778e+06
121	1997-06-28 14:30:00	1997-06-28 17:29:59	1997-06-28 18:00:00	0.214283	0.5	0	1997-06-28 21:00:00	1997-06-29 04:30:00	1997-06-29 05:00:00	699	718	712.75	23779.7
122	1997-06-29 06:30:00	1997-06-29 07:00:00	1997-06-29 08:00:00	0.15	0.3	0.5	1997-06-29 06:45:00	1997-06-29 07:00:00	1997-06-29 18:00:00	711	718	699	332340
123	1997-06-30 02:00:00	1997-06-30 18:30:00	1997-07-01 13:00:00	0.799946	5.2	0.8	1997-06-30 02:00:00	1997-06-30 22:00:00	1997-07-02 09:00:00	696	803	644	1.28372e+07
124	1997-07-18 07:00:00	1997-07-18 10:58:49	1997-07-18 17:00:00	0.2	1.1	0.1	1997-07-18 10:00:00	1997-07-19 05:15:00	1997-07-19 20:00:00	424.5	462	413	2.26329e+06
125	1997-08-10 12:20:00	1997-08-11 14:30:04	1997-08-11 18:00:00	0.999627	6.1	0	1997-08-10 13:00:00	1997-08-11 23:30:00	1997-08-13 09:00:00	216.25	253	224	3.31198e+06
126	1997-09-10 04:00:00	1997-09-10 14:29:59	1997-09-10 16:00:00	0.399996	2.3	0.6	1997-09-10 04:00:00	1997-09-11 15:15:00	1997-09-13 19:00:00	124.5	283	161	1.44596e+07
127	1997-10-02 06:20:00	1997-10-02 07:29:58	1997-10-02 10:00:00	0.699866	1.5	0	1997-10-02 07:00:00	1997-10-02 17:30:00	1997-10-03 17:00:00	118.5	141	123	1.46326e+06
128	1997-10-04 13:00:00	1997-10-04 13:30:00	1997-10-04 16:00:00	0.1	0.4	1.7	1997-10-04 13:15:00	1997-10-04 13:15:00	1997-10-04 19:00:00	120	120	118	10721.7
129	1997-10-09 01:20:00	1997-10-09 07:29:58	1997-10-09 18:00:00	1.09971	9.9	4.3	1997-10-09 02:00:00	1997-10-09 19:30:00	1997-10-12 11:00:00	130	197	145	7.38358e+06
130	1997-10-29 06:00:00	1997-10-30 18:29:54	1997-10-31 04:00:00	1.79905	32.1	4	1997-10-29 12:00:00	1997-10-31 05:30:00	1997-11-01 11:00:00	121.5	299	163	1.7738e+07
131	1997-11-07 12:00:00	1997-11-07 15:30:09	1997-11-07 19:00:00	0.4	2	0	1997-11-07 14:00:00	1997-11-08	1997-11-08 12:00:00	124.5	144	138	596025
132	1997-11-19 05:00:00	1997-11-19 05:33:54	1997-11-20 14:00:00	1	8.6	2.4	1997-11-19 05:00:00	1997-11-21 00:45:00	1997-11-21 07:00:00	109.5	120	113	244580
133	1997-11-21 02:00:00	1997-11-21 02:30:00	1997-11-21 11:00:00	0.1	1	11	1997-11-21 02:15:00	1997-11-21 02:15:00	1997-11-21 12:00:00	120	120	113	484.615
134	1997-11-24 08:00:00	1997-11-25 05:30:00	1997-11-25 09:00:00	0.999899	6.2	14.6	1997-11-24 15:00:00	1997-11-24 18:45:00	1997-11-25 10:00:00	118.5	123	118	160496
135	1997-11-26 08:00:00	1997-11-26 09:30:01	1997-11-26 12:00:00	1.19974	2.5	12.2	1997-11-26 10:00:00	1997-11-27 12:00:00	1997-11-27 23:00:00	70	125	110	2.22103e+06
136	1997-11-26 20:00:00	1997-11-26 20:30:00	1997-11-26 22:00:00	0.1	0.3	14.7	1997-11-26 20:00:00	1997-11-27 15:45:00	1997-11-27 23:00:00	101.5	136	110	784596
137	1997-12-07 22:00:00	1997-12-08 00:58:59	1997-12-08 13:00:00	0.2	1.7	0.1	1997-12-08 02:00:00	1997-12-08 13:15:00	1997-12-08 19:00:00	118	136	120	266718
138	1997-12-17 06:00:00	1997-12-17 10:50:25	1997-12-17 18:00:00	0.2	2	2.3	1997-12-18 03:00:00	1997-12-18 11:45:00	1997-12-18 16:00:00	115.75	125	117.25	56899
139	1998-01-01 13:20:00	1998-01-02 05:30:04	1998-01-03 14:00:00	2.1991	31.9	0.6	1998-01-01 14:00:00	1998-01-03 18:00:00	1998-01-03 22:00:00	110	120	113	649322
140	1998-01-07 07:00:00	1998-01-07 17:43:49	1998-01-07 20:00:00	0.7	4	34.7	1998-01-07 07:00:00	1998-01-07 16:00:00	1998-01-07 23:00:00	105.25	123	108	279562
141	1998-01-14 13:00:00	1998-01-15 01:29:56	1998-01-15 11:00:00	1.59943	16.6	54.6	1998-01-14 13:00:00	1998-01-14 13:15:00	1998-01-15 12:00:00	114	115	106	1428.26
142	1998-01-16 09:00:00	1998-01-17 04:30:04	1998-01-17 16:00:00	2.69772	13.8	29.7	1998-01-17 01:00:00	1998-01-17 03:15:00	1998-01-17 22:00:00	115.25	120	113	126169
143	1998-01-27 07:00:00	1998-01-27 07:30:00	1998-01-27 10:00:00	0.1	0.4	7.8	1998-01-27 07:00:00	1998-01-28 05:45:00	1998-01-28 12:00:00	90.5	97	80	714581
144	1998-01-30 06:00:00	1998-01-30 15:10:20	1998-01-30 16:00:00	0.1	1.1	4.7	1998-01-31 04:00:00	1998-01-31 13:45:00	1998-02-03 12:00:00	88.5	101	97	749746
145	1998-02-01 23:00:00	1998-02-01 23:30:00	1998-02-02 07:00:00	0.1	0.6	1.9	1998-02-03 04:00:00	1998-02-03 05:45:00	1998-02-03 12:00:00	104.5	108	97	124214
146	1998-02-04 17:00:00	1998-02-04 17:30:00	1998-02-04 22:00:00	0.1	0.6	4.1	1998-02-04 17:00:00	1998-02-04 17:45:00	1998-02-05	92	94	91.5	22114.3
147	1998-02-05 06:00:00	1998-02-05 06:30:00	1998-02-05 13:00:00	0.2	0.7	3.2	1998-02-05 10:00:00	1998-02-05 15:45:00	1998-02-05 19:00:00	88	94	92	37600
148	1998-02-06 20:00:00	1998-02-07 05:29:58	1998-02-07 10:00:00	0.199963	1.4	3.9	1998-02-07 09:00:00	1998-02-07 14:15:00	1998-02-07 18:00:00	90	94	92	23000
149	1998-02-09 13:00:00	1998-02-09 13:30:00	1998-02-09 15:00:00	0.1	0.3	8.4	1998-02-09 13:00:00	1998-02-09 16:15:00	1998-02-09 18:00:00	94.25	101	88	65756.3
150	1998-02-17 15:00:00	1998-02-17 20:10:57	1998-02-18 02:00:00	0.8	5.4	8.8	1998-02-17 15:00:00	1998-02-17 16:45:00	1998-02-18 08:00:00	102	120	76.5	368100
151	1998-02-20 23:00:00	1998-02-22 06:30:00	1998-02-22 16:00:00	0.999895	12.9	5.4	1998-02-21 07:00:00	1998-02-23 15:30:00	1998-02-23 23:00:00	75.5	106	78	1181700
152	1998-03-22 01:00:00	1998-03-22 13:30:02	1998-03-25 19:00:00	2.19944	43.9	0	1998-03-22 08:00:00	1998-03-24 19:30:00	1998-03-27 02:00:00	90.5	191	163	1.06644e+07
153	1998-04-19 11:00:00	1998-04-19 11:30:00	1998-04-19 14:00:00	0.1	0.4	0.2	1998-04-19 14:00:00	1998-04-19 20:00:00	1998-04-20 03:00:00	135.25	152	146	244082
154	1998-05-08 11:00:00	1998-05-08 19:30:03	1998-05-09 17:00:00	0.499903	5.3	3.4	1998-05-08 20:00:00	1998-05-10 04:15:00	1998-05-10 17:00:00	511	591	557	3.91883e+06
155	1998-05-22 19:00:00	1998-05-23 00:29:59	1998-05-24 03:00:00	0.399998	5.1	10.1	1998-05-23 04:00:00	1998-05-23 12:45:00	1998-05-24 04:00:00	406.75	452	394	2.14684e+06
156	1998-05-25 12:00:00	1998-05-25 19:39:15	1998-05-27 04:00:00	0.8	13.6	14.7	1998-05-25 17:00:00	1998-05-26 21:15:00	1998-05-28 02:00:00	376	674	514	2.59786e+07
157	1998-06-02 13:00:00	1998-06-03 13:52:13	1998-06-03 17:00:00	0.4	3.9	0.5	1998-06-02 14:00:00	1998-06-04 02:00:00	1998-06-04 21:00:00	484.5	557	514	4.82252e+06
158	1998-06-08 02:00:00	1998-06-08 07:29:59	1998-06-08 17:00:00	0.799998	4.3	8.7	1998-06-08 03:00:00	1998-06-08 20:45:00	1998-06-09 22:00:00	488.25	535	472	4.356e+06
159	1998-06-09 13:00:00	1998-06-09 15:58:59	1998-06-09 18:00:00	0.2	0.9	9.1	1998-06-09 13:15:00	1998-06-09 13:15:00	1998-06-09 22:00:00	503	503	472	16251.4
160	1998-06-10 12:00:00	1998-06-10 12:30:00	1998-06-10 20:00:00	0.3	1.7	9.4	1998-06-11 01:00:00	1998-06-11 07:45:00	1998-06-11 18:00:00	465.75	482	477	397969
161	1998-06-11 10:00:00	1998-06-11 16:22:54	1998-06-11 19:00:00	0.4	2.7	6.9	1998-06-11 19:00:00	1998-06-12 17:00:00	1998-06-14 21:00:00	480.75	557	535	1.11412e+07
162	1998-06-13 16:00:00	1998-06-13 16:30:00	1998-06-13 20:00:00	0.1	0.5	10.7	1998-06-13 23:00:00	1998-06-14 02:00:00	1998-06-14 05:00:00	565.5	574	550.5	243000
163	1998-06-15 11:00:00	1998-06-16 04:30:02	1998-06-16 15:00:00	0.39994	4.1	6.9	1998-06-15 17:00:00	1998-06-16 13:45:00	1998-06-17 21:00:00	540.5	602	482	9.00158e+06
164	1998-06-22 13:00:00	1998-06-22 19:11:04	1998-06-23 03:00:00	0.8	4.5	4.1	1998-06-22 21:00:00	1998-06-24 01:30:00	1998-06-29 04:00:00	462	508	492	8.4124e+07
165	1998-06-23 11:30:00	1998-06-23 13:29:58	1998-06-23 20:00:00	0.399966	2.2	8.4	1998-06-23 18:00:00	1998-06-24 19:45:00	1998-06-29 01:00:00	489.5	524	514	7.1931e+07
166	1998-06-24 09:00:00	1998-06-25 10:29:59	1998-06-26 21:00:00	2.19993	21.4	10.6	1998-06-24 18:00:00	1998-06-26 07:15:00	1998-06-28 20:00:00	514	914	524	6.51665e+07
167	1998-07-01 18:30:00	1998-07-01 19:29:57	1998-07-01 20:00:00	0.399866	0.6	0.8	1998-07-01 18:45:00	1998-07-01 19:00:00	1998-07-01 22:00:00	552	557	552	31500
168	1998-07-02 15:00:00	1998-07-02 15:30:00	1998-07-02 17:00:00	1.1	1.4	1.4	1998-07-02 21:00:00	1998-07-03 00:45:00	1998-07-03 18:00:00	536.5	546	530	742034
169	1998-07-03 15:00:00	1998-07-03 18:41:58	1998-07-03 20:00:00	0.459939	1.2	2.8	1998-07-03 15:15:00	1998-07-03 15:15:00	1998-07-04	541	541	535	0
170	1998-07-04 20:00:00	1998-07-04 20:30:00	1998-07-04 22:00:00	0.1	0.3	4	1998-07-04 21:00:00	1998-07-05 05:30:00	1998-07-05 20:00:00	530	602	524	3.03756e+06
171	1998-09-08 11:00:00	1998-09-08 12:30:01	1998-09-08 19:00:00	0.199967	0.7	12.5	1998-09-08 13:00:00	1998-09-09 19:00:00	1998-09-15 18:00:00	94	152	108	1.99693e+07
172	1998-09-09 02:12:00	1998-09-09 05:29:56	1998-09-10 17:00:00	4.49911	27.6	13.2	1998-09-09 07:00:00	1998-09-10 08:00:00	1998-09-13 20:00:00	100	197	120	1.44558e+07
173	1998-10-01 12:02:51	1998-10-01 12:32:51	1998-10-01 19:00:00	2.10475	2.7	2.3	1998-10-01 13:00:00	1998-10-02 11:15:00	1998-10-05 09:00:00	87	120	94	3.74546e+06
174	1998-11-02 13:00:00	1998-11-02 14:30:07	1998-11-02 19:00:00	0.2	0.9	0.4	1998-11-02 13:00:00	1998-11-02 15:15:00	1998-11-02 23:00:00	89	92	90	70672.5
175	1998-11-04 06:00:00	1998-11-04 06:30:00	1998-11-04 09:00:00	0.1	0.4	0.9	1998-11-04 13:00:00	1998-11-04 21:30:00	1998-11-05 04:00:00	86	88	86	41400
176	1998-11-10 15:00:00	1998-11-10 15:30:00	1998-11-11 03:00:00	0.1	0.7	7.3	1998-11-10 15:00:00	1998-11-10 20:15:00	1998-11-11 06:00:00	82	84	78	80880
177	1998-11-13 17:00:00	1998-11-13 20:29:57	1998-11-14	0.499932	2.3	4.1	1998-11-13 17:00:00	1998-11-14 19:45:00	1998-11-15 09:00:00	90.5	101	97	623585
178	1998-11-20 16:00:00	1998-11-21 16:29:58	1998-11-22 18:00:00	1.4996	36.4	6.2	1998-11-20 16:00:00	1998-11-21 21:15:00	1998-11-22 19:00:00	86	103	92	688156
179	1998-11-23 01:00:00	1998-11-23 18:40:03	1998-11-24 17:00:00	1.5	19.8	36.7	1998-11-23 03:00:00	1998-11-24 05:45:00	1998-11-24 18:00:00	84.5	128	115	1.10077e+06
180	1998-11-30 20:12:00	1998-11-30 22:30:00	1998-12-01 09:00:00	2.19997	11.5	16.8	1998-11-30 22:00:00	1998-12-01 04:00:00	1998-12-01 12:00:00	106	120	115	220211
181	1998-12-18 02:00:00	1998-12-18 02:30:00	1998-12-18 05:00:00	0.2	0.6	1.1	1998-12-18 08:00:00	1998-12-18 15:30:00	1998-12-19 01:00:00	75.5	106	59	1.04984e+06
182	1998-12-24 03:00:00	1998-12-30 05:30:05	1998-12-30 11:00:00	2.19985	61.3	0	1998-12-26 06:00:00	1998-12-26 12:45:00	1998-12-30 14:00:00	108	120	94	1.0355e+06
183	1999-01-26 12:00:00	1999-01-26 12:30:00	1999-01-26 19:00:00	0.1	0.8	12.2	1999-01-26 12:00:00	1999-01-27 16:30:00	1999-01-27 21:00:00	91.5	106	88	580275
184	1999-02-25 03:06:39	1999-02-25 04:29:57	1999-02-26 17:00:00	2.89838	20.3	41.7	1999-02-25 12:00:00	1999-02-27 03:30:00	1999-02-27 12:00:00	85.5	103	80	1834875
185	1999-02-27 09:00:00	1999-02-28 01:30:00	1999-02-28 23:00:00	1.89965	14	20.3	1999-02-27 13:00:00	1999-02-28 21:00:00	1999-03-01 06:00:00	87	106	101	277398
186	1999-03-21 05:30:00	1999-03-21 06:00:00	1999-03-21 07:00:00	0.15	0.3	0	1999-03-21 17:00:00	1999-03-21 19:30:00	1999-03-22 04:00:00	101	106	103	114014
187	1999-03-22 13:00:00	1999-03-22 13:30:00	1999-03-22 15:00:00	0.1	0.3	0.3	1999-03-22 13:00:00	1999-03-23 13:45:00	1999-03-23 17:00:00	104.5	123	114.5	335443
188	1999-04-19 13:00:00	1999-04-19 13:30:00	1999-04-19 15:00:00	0.1	0.3	0	1999-04-19 16:00:00	1999-04-20 14:45:00	1999-04-22 11:00:00	226	260	234	7.27473e+06
189	1999-04-19 23:00:00	1999-04-19 23:30:00	1999-04-20 03:00:00	0.1	0.5	0.3	1999-04-19 23:00:00	1999-04-20 20:30:00	1999-04-21 09:00:00	249	287	262	1.21137e+06
190	1999-05-01 13:00:00	1999-05-03 05:29:59	1999-05-03 21:00:00	0.399968	8.1	2.8	1999-05-01 13:00:00	1999-05-02 20:15:00	1999-05-04 09:00:00	434.5	597	358	22182975
191	1999-05-28 21:00:00	1999-05-29 12:29:59	1999-05-29 19:00:00	0.499988	4.2	0	1999-05-28 22:00:00	1999-05-29 21:00:00	1999-05-30 22:00:00	998.75	1260	1180	1.84838e+07
192	1999-05-30 08:04:36	1999-05-30 08:34:36	1999-05-30 16:00:00	1.30767	2.2	4.2	1999-05-30 08:19:36	1999-05-30 08:30:00	1999-05-30 22:00:00	1240	1240	1180	128000
193	1999-06-01 10:00:00	1999-06-02 11:29:59	1999-06-04 05:00:00	0.49999	10.7	7.6	1999-06-01 10:00:00	1999-06-02 19:45:00	1999-06-04 11:00:00	974.75	1130	1060	1.43243e+07
194	1999-06-15 19:00:00	1999-06-15 19:30:00	1999-06-15 23:00:00	0.5	0.8	0.1	1999-06-15 19:00:00	1999-06-16 18:45:00	1999-06-23 10:00:00	845.75	1060	1000	1.21494e+08
195	1999-06-16 10:00:00	1999-06-16 21:30:01	1999-06-17 15:00:00	0.499913	3.3	0.9	1999-06-16 10:00:00	1999-06-18 09:15:00	1999-06-22 05:00:00	991.5	1180	1110	4.52974e+07
196	1999-10-06 07:00:00	1999-10-06 07:30:00	1999-10-06 14:00:00	0.1	0.8	0	1999-10-06 13:00:00	1999-10-07	1999-10-08 11:00:00	83	90	84	601655
197	1999-10-27 20:30:00	1999-10-28 02:30:03	1999-10-30 05:00:00	1.7	20.9	1.3	1999-10-27 23:00:00	1999-10-28 14:45:00	1999-10-30 06:00:00	85	249	123	1.17217e+07
198	1999-11-04 16:00:00	1999-11-04 23:30:02	1999-11-05 07:00:00	0.399872	2.3	0.1	1999-11-04 16:00:00	1999-11-05 06:45:00	1999-11-05 14:00:00	118.5	136	130	438878
199	1999-11-25 06:00:00	1999-11-26 13:30:00	1999-11-26 17:00:00	0.499958	7.4	0.6	1999-11-25 09:00:00	1999-11-26 15:30:00	1999-11-27 07:00:00	85.5	245	158	5.74172e+06
200	1999-12-02 10:00:00	1999-12-02 10:30:00	1999-12-02 18:00:00	0.1	0.9	3.7	1999-12-02 13:00:00	1999-12-02 18:45:00	1999-12-03 02:00:00	83	108	86	618802
201	1999-12-03 05:30:00	1999-12-03 06:00:00	1999-12-03 15:00:00	0.15	0.6	4.6	1999-12-03 11:00:00	1999-12-03 16:00:00	1999-12-04 10:00:00	76	103	60	1.02829e+06
202	1999-12-10 10:00:00	1999-12-10 10:30:00	1999-12-10 12:00:00	0.1	0.3	1.5	1999-12-10 10:00:00	1999-12-10 15:15:00	1999-12-10 23:00:00	95.5	130	94	692455
203	1999-12-11 04:00:00	1999-12-11 04:30:00	1999-12-11 11:00:00	0.1	0.5	1.8	1999-12-11 07:00:00	1999-12-11 15:15:00	1999-12-11 22:00:00	99	108	101	193590
204	1999-12-12 15:00:00	1999-12-12 22:10:17	1999-12-13 07:00:00	0.3	3.3	2.3	1999-12-12 15:00:00	1999-12-12 20:15:00	1999-12-13 11:00:00	102	106	101	129960
205	2000-01-13 13:00:00	2000-01-13 16:30:03	2000-01-13 22:00:00	1.0998	5.5	27.2	2000-01-14 02:00:00	2000-01-14 02:30:00	2000-01-14 06:00:00	91	92	90	14231.3
206	2000-02-16 15:00:00	2000-02-16 15:30:00	2000-02-16 19:00:00	0.1	0.5	26.8	2000-02-16 15:00:00	2000-02-17 15:00:00	2000-02-17 17:00:00	99.5	108	97	56795.2
207	2000-02-29 15:00:00	2000-02-29 15:30:00	2000-02-29 22:00:00	0.1	0.6	5.4	2000-02-29 15:00:00	2000-02-29 15:30:00	2000-02-29 23:00:00	99	101	80	5006.25
208	2000-03-02 17:00:00	2000-03-02 17:30:00	2000-03-02 19:00:00	0.1	0.3	6	2000-03-02 21:00:00	2000-03-03 15:30:00	2000-03-03 19:00:00	80	110	79.5	415539
209	2000-03-03 15:00:00	2000-03-03 15:30:00	2000-03-03 19:00:00	0.1	0.3	2.9	2000-03-03 15:00:00	2000-03-04 16:15:00	2000-03-04 19:00:00	108.5	113	84.5	227732
210	2000-04-13 05:00:00	2000-04-13 10:30:05	2000-04-13 13:00:00	0.999831	3.1	1.9	2000-04-13 11:00:00	2000-04-13 21:15:00	2000-04-14 10:00:00	298	367	307	2710350
211	2000-04-25 06:00:00	2000-04-25 13:39:15	2000-04-25 20:00:00	0.2	1.6	2.2	2000-04-25 15:00:00	2000-04-26 01:00:00	2000-04-26 13:00:00	281	349	283	2.63522e+06
212	2000-04-27 19:00:00	2000-04-27 22:29:57	2000-04-27 23:00:00	0.133243	0.5	2.6	2000-04-27 19:00:00	2000-04-28 03:45:00	2000-04-28 17:00:00	309	432	385	4.17228e+06
213	2000-05-06 05:00:00	2000-05-06 09:30:04	2000-05-07 02:00:00	0.2	1.7	6.4	2000-05-06 05:15:00	2000-05-06 05:15:00	2000-05-08	492	487	413	564232
214	2000-05-07 12:30:00	2000-05-07 14:52:01	2000-05-07 20:00:00	0.6	2.8	8.1	2000-05-07 12:45:00	2000-05-07 12:45:00	2000-05-08	452	452	413	121860
215	2000-05-08 12:00:00	2000-05-08 13:30:13	2000-05-08 20:00:00	0.5	3.1	10.9	2000-05-08 19:00:00	2000-05-09 19:15:00	2000-05-10 10:00:00	380	477	403	4.48174e+06
216	2000-06-11 17:00:00	2000-06-12 12:30:04	2000-06-13 05:00:00	2.69899	17.3	0.4	2000-06-11 19:00:00	2000-06-13 03:00:00	2000-06-14 19:00:00	403	750	541	3.19404e+07
217	2000-08-31 19:00:00	2000-09-01 19:29:58	2000-09-02 17:00:00	1.19978	8.6	0	2000-08-31 20:00:00	2000-09-03 00:45:00	2000-09-07 23:00:00	59	94	66	1.21184e+07
218	2000-10-10 08:20:00	2000-10-10 15:50:50	2000-10-14 15:00:00	1.6	45.7	0	2000-10-10 10:00:00	2000-10-12 20:00:00	2000-10-15 19:00:00	80	128	90	6.42878e+06
219	2000-10-15 16:06:00	2000-10-15 16:36:00	2000-10-15 18:00:00	0.98	1.8	45.7	2000-10-15 16:21:00	2000-10-15 16:30:00	2000-10-15 19:00:00	92	92	90	2700
220	2000-10-19 00:15:00	2000-10-19 00:45:00	2000-10-19 03:00:00	0.31875	0.7	1.9	2000-10-19 05:00:00	2000-10-19 11:00:00	2000-10-20 07:00:00	83	86	82	228150
221	2000-10-20 18:06:00	2000-10-20 21:30:02	2000-10-21 18:00:00	1.39976	10.7	2.7	2000-10-20 23:00:00	2000-10-21 13:45:00	2000-10-22 18:00:00	84	118	92	2.54133e+06
222	2000-10-28 14:00:00	2000-10-29 05:29:59	2000-10-30 03:00:00	2.89992	17.4	6.9	2000-10-29 02:00:00	2000-10-29 15:45:00	2000-10-31 03:00:00	90	123	97	2.57914e+06
223	2000-11-18 06:00:00	2000-11-19 01:57:43	2000-11-19 05:00:00	0.1	2.4	4.2	2000-11-18 08:00:00	2000-11-18 16:00:00	2000-11-20 03:00:00	49	110	61	3.56565e+06
224	2000-11-24 02:00:00	2000-11-24 02:30:00	2000-11-24 05:00:00	0.1	0.4	2.4	2000-11-24 10:00:00	2000-11-24 12:30:00	2000-11-24 20:00:00	82.5	90	76	210825
225	2000-11-29 14:15:00	2000-11-29 16:30:00	2000-11-30 08:00:00	2.79992	13.5	5	2000-11-29 15:00:00	2000-11-30 12:45:00	2000-12-01 03:00:00	111	120	81	898538
226	2000-12-09 05:00:00	2000-12-09 10:29:59	2000-12-09 13:00:00	0.199998	1.1	0	2000-12-09 05:00:00	2000-12-09 13:30:00	2000-12-10 09:00:00	102.25	123	84	1.25944e+06
227	2000-12-13 21:00:00	2000-12-14 23:30:00	2000-12-15 14:00:00	0.399977	4.2	1.3	2000-12-14 03:00:00	2000-12-14 15:45:00	2000-12-15 16:00:00	103.75	123	88	1.26677e+06
228	2001-03-31 16:00:00	2001-03-31 22:30:01	2001-04-01 01:00:00	0.499969	2	1.2	2001-03-31 16:00:00	2001-04-01 20:45:00	2001-04-02 09:00:00	117.25	152	113	2.06888e+06
229	2001-04-23 03:00:00	2001-04-23 03:30:00	2001-04-23 05:00:00	0.2	0.5	9.2	2001-04-23 03:15:00	2001-04-23 03:15:00	2001-04-23 06:00:00	108	108	106	7363.64
230	2001-04-30 08:00:00	2001-04-30 17:30:04	2001-04-30 20:00:00	0.4	2.1	1.3	2001-04-30 16:00:00	2001-05-01 05:15:00	2001-05-01 22:00:00	170.5	268	197	4054065
231	2001-05-14 16:00:00	2001-05-16 00:30:01	2001-05-16 09:00:00	0.5	7.6	0	2001-05-14 19:00:00	2001-05-16 12:30:00	2001-05-18 03:00:00	291	608	389	4.40965e+07
232	2001-06-03 07:00:00	2001-06-03 07:30:00	2001-06-03 14:00:00	0.1	0.8	0.3	2001-06-03 07:00:00	2001-06-03 21:15:00	2001-06-04 08:00:00	219	249	238	751536
233	2001-06-11 15:00:00	2001-06-11 18:00:30	2001-06-12 02:00:00	0.2	0.9	0.2	2001-06-11 16:00:00	2001-06-12 10:00:00	2001-06-13 05:00:00	158.75	221	204	2.97404e+06
234	2001-07-08 17:00:00	2001-07-08 17:30:00	2001-07-08 19:00:00	0.1	0.3	0	2001-07-08 17:15:00	2001-07-08 22:00:00	2001-07-09 01:00:00	88	90	88	19800
235	2001-07-15 05:00:00	2001-07-15 05:30:00	2001-07-15 11:00:00	0.2	0.5	1.4	2001-07-15 05:00:00	2001-07-16 08:00:00	2001-07-17 20:00:00	74	92	72	1.79372e+06
236	2001-07-30 03:00:00	2001-07-30 03:30:00	2001-07-30 16:00:00	0.4	2.6	0	2001-07-30 04:00:00	2001-07-31 01:00:00	2001-08-02 21:00:00	48.75	94	56	6.92629e+06
237	2001-09-05 17:15:00	2001-09-05 20:30:01	2001-09-06 10:00:00	1.89965	14.2	0	2001-09-05 22:00:00	2001-09-06 10:45:00	2001-09-11 16:00:00	39.5	94	53	9.4255e+06
238	2001-09-13 10:00:00	2001-09-13 21:30:01	2001-09-14 01:00:00	1.19977	5.5	0.3	2001-09-13 20:00:00	2001-09-14 03:30:00	2001-09-15 06:00:00	55	74	59	1.16312e+06
239	2001-10-22 08:00:00	2001-10-22 19:30:01	2001-10-23 19:00:00	1.19988	11.2	0.6	2001-10-22 15:00:00	2001-10-23 09:00:00	2001-10-24 19:00:00	61.5	152	84	5.93468e+06
240	2001-10-27 17:00:00	2001-10-28 11:30:03	2001-10-28 21:00:00	0.499907	3.2	11.2	2001-10-28 07:00:00	2001-10-29 03:15:00	2001-11-06 09:00:00	71	101	78	2.37164e+07
241	2001-10-30 02:00:00	2001-10-30 21:29:58	2001-11-01 05:00:00	0.799918	11.4	3.2	2001-10-30 13:00:00	2001-10-31 11:45:00	2001-11-02 16:00:00	87	166	106	9481107
242	2001-11-17 09:00:00	2001-11-17 13:29:58	2001-11-17 16:00:00	0.799965	3.5	0	2001-11-17 14:00:00	2001-11-17 19:30:00	2001-11-18 08:00:00	67	78	74	318238
243	2001-11-20 23:00:00	2001-11-21 04:29:59	2001-11-21 08:00:00	1.69999	5.7	3.5	2001-11-20 23:00:00	2001-11-21 13:30:00	2001-11-22 01:00:00	70.5	94	88	764057
244	2001-11-28 09:00:00	2001-11-28 18:29:58	2001-11-30 14:00:00	0.799889	10.3	3.4	2001-11-28 11:00:00	2001-11-29 16:00:00	2001-11-30 21:00:00	42.5	97	78	1.67674e+06
245	2001-12-17 01:00:00	2001-12-17 03:30:02	2001-12-17 19:00:00	1.39994	10.6	51.9	2001-12-17 01:00:00	2001-12-17 01:30:00	2001-12-17 20:00:00	99.5	101	97	91906.6
246	2001-12-18 16:00:00	2001-12-18 17:30:01	2001-12-19 10:00:00	1.4999	10.9	59.6	2001-12-18 16:00:00	2001-12-18 21:30:00	2001-12-19 15:00:00	93.5	103	99	292182
247	2002-04-10 06:00:00	2002-04-10 07:30:13	2002-04-10 17:00:00	0.3	1.8	5.9	2002-04-10 14:00:00	2002-04-10 18:30:00	2002-04-11 10:00:00	179	217	175	1379835
248	2002-04-11 10:00:00	2002-04-11 10:30:00	2002-04-11 13:00:00	0.2	0.6	7.7	2002-04-11 14:00:00	2002-04-11 20:15:00	2002-04-12 09:00:00	175	207	178	1.11026e+06
249	2002-04-13 18:00:00	2002-04-14 07:29:57	2002-04-14 14:00:00	8.99833	45.2	7.1	2002-04-13 18:00:00	2002-04-14 19:00:00	2002-04-15 12:00:00	295	973	492	2.74156e+07
250	2002-06-21 16:30:00	2002-06-21 17:30:03	2002-06-21 22:00:00	0.3999	1.1	0	2002-06-21 20:00:00	2002-06-22 10:30:00	2002-06-23 08:00:00	411.75	472	452	3.30919e+06
251	2002-08-28 11:30:00	2002-08-28 12:29:57	2002-08-28 14:00:00	0.399866	0.7	0.1	2002-08-28 22:00:00	2002-08-29 06:00:00	2002-08-29 22:00:00	76.5	80	76	211748
252	2002-09-06 18:00:00	2002-09-06 18:30:00	2002-09-06 21:00:00	0.2	0.5	0.4	2002-09-06 21:00:00	2002-09-07 03:30:00	2002-09-08 18:00:00	65	80	68	1254165
253	2002-10-22 07:00:00	2002-10-22 17:30:05	2002-10-23 04:00:00	0.4	3.4	0	2002-10-22 11:00:00	2002-10-22 22:00:00	2002-10-25 07:00:00	61.5	80	64	2.8411e+06
254	2002-11-08 00:30:00	2002-11-08 06:30:03	2002-11-10 14:00:00	2.1997	27	0.2	2002-11-08 04:00:00	2002-11-09 06:30:00	2002-11-10 17:00:00	67	70	68	126210
255	2002-11-12 08:00:00	2002-11-12 08:30:00	2002-11-12 10:00:00	0.1	0.3	27.2	2002-11-12 08:00:00	2002-11-12 17:15:00	2002-11-12 21:00:00	49.75	82	72	349178
256	2002-11-12 19:00:00	2002-11-13 00:29:59	2002-11-13 05:00:00	0.399998	2.1	27.5	2002-11-12 19:15:00	2002-11-12 19:15:00	2002-11-13 06:00:00	78	78	76	13353.5
257	2002-11-22 18:00:00	2002-11-23 17:39:22	2002-11-24 04:00:00	0.6	6.6	0.9	2002-11-22 18:00:00	2002-11-24 15:30:00	2002-11-24 18:00:00	70	90	74	562838
258	2002-12-13 06:00:00	2002-12-13 08:28:50	2002-12-13 12:00:00	0.2	1	8	2002-12-13 06:00:00	2002-12-13 12:45:00	2002-12-13 17:00:00	61	74	68	101680
259	2002-12-26 20:00:00	2002-12-27 10:29:58	2002-12-28 12:00:00	0.699961	12.5	4.8	2002-12-27 01:00:00	2002-12-28 14:45:00	2002-12-28 18:00:00	84	115	103	123059
260	2003-01-29 20:00:00	2003-01-30 04:30:03	2003-02-01 22:00:00	1.59952	24.4	26	2003-01-30 03:00:00	2003-02-02 14:45:00	2003-02-03 07:00:00	102.5	182	136	8.79974e+06
261	2003-03-05 12:00:00	2003-03-07 07:37:21	2003-03-08 06:00:00	0.4	15.5	3.7	2003-03-05 12:00:00	2003-03-05 12:15:00	2003-03-08 13:00:00	80	80	66	258.904
262	2003-03-09 09:00:00	2003-03-09 10:30:13	2003-03-10 05:00:00	0.5	3.6	15.5	2003-03-09 09:00:00	2003-03-09 11:30:00	2003-03-10 06:00:00	61	80	68	383175
263	2003-03-12	2003-03-12 00:30:00	2003-03-12 05:00:00	0.1	0.6	3.6	2003-03-12	2003-03-12 20:45:00	2003-03-13 11:00:00	76	90	83.5	393332
264	2003-03-14	2003-03-14 05:29:59	2003-03-14 16:00:00	0.199998	1.6	4.2	2003-03-14	2003-03-14 18:45:00	2003-03-15 06:00:00	101	141	125	1469700
265	2003-03-15 06:00:00	2003-03-15 21:29:53	2003-03-16 07:00:00	1.69913	10.5	5.8	2003-03-15 09:00:00	2003-03-15 20:45:00	2003-03-16 08:00:00	128	138	130	298096
266	2003-03-21 12:00:00	2003-03-22 17:29:58	2003-03-23 05:00:00	2.39977	26.4	0	2003-03-21 13:00:00	2003-03-23	2003-03-24 08:00:00	105.75	169	123	4.97847e+06
267	2003-04-16 07:00:00	2003-04-16 07:30:00	2003-04-16 12:00:00	0.1	0.6	2.6	2003-04-16 10:00:00	2003-04-16 21:30:00	2003-04-17 10:00:00	207.75	235	207	1.10327e+06
268	2003-04-17 05:00:00	2003-04-17 06:30:07	2003-04-17 10:00:00	0.2	0.8	3.2	2003-04-17 15:00:00	2003-04-17 20:15:00	2003-04-18 02:00:00	209.25	242	228	483382
269	2003-05-25 13:00:00	2003-05-25 13:30:00	2003-05-25 17:00:00	0.1	0.5	0	2003-05-25 15:00:00	2003-05-26 10:15:00	2003-06-05 19:00:00	750	858	810	2.22601e+08
270	2003-05-30 06:00:00	2003-05-30 13:30:02	2003-05-30 17:00:00	2.29859	3.1	0.5	2003-05-30 06:00:00	2003-05-31 08:45:00	2003-06-01 01:00:00	1142.5	1400	1260	1.5123e+07
271	2003-06-17 17:00:00	2003-06-17 17:30:00	2003-06-17 19:00:00	0.1	0.3	0	2003-06-17 20:00:00	2003-06-18 10:30:00	2003-06-18 18:00:00	651.5	711	694.5	1.40838e+06
272	2003-08-03 10:00:00	2003-08-03 14:29:58	2003-08-03 20:00:00	0.59993	2.4	0	2003-08-03 10:00:00	2003-08-04 04:45:00	2003-08-04 22:00:00	111.5	136	113	1.49018e+06
273	2003-08-22 08:00:00	2003-08-22 18:29:59	2003-08-22 23:00:00	3.99997	15.8	0	2003-08-22 08:00:00	2003-08-23 01:30:00	2003-08-24 08:00:00	80	152	97	4.04172e+06
274	2003-10-31 06:00:00	2003-10-31 06:30:00	2003-10-31 09:00:00	0.1	0.4	0.6	2003-10-31 09:00:00	2003-10-31 19:15:00	2003-11-01 06:00:00	60.5	88	52	1202175
275	2003-10-31 16:00:00	2003-10-31 16:30:00	2003-10-31 18:00:00	0.1	0.3	1	2003-10-31 16:00:00	2003-11-01 16:15:00	2003-11-02 05:00:00	80	103	56	1.23869e+06
276	2003-11-10 06:00:00	2003-11-11 03:30:00	2003-11-12 05:00:00	2.29992	28.9	0	2003-11-10 11:00:00	2003-11-12 15:45:00	2003-11-12 22:00:00	94.75	123	79	2.09731e+06
277	2003-11-16 05:20:00	2003-11-17 09:30:00	2003-11-17 17:00:00	0.399978	10	28.9	2003-11-16 07:00:00	2003-11-16 14:45:00	2003-11-17 19:00:00	102	108	99	364069
278	2003-11-18 01:00:00	2003-11-18 02:30:01	2003-11-18 05:00:00	0.199956	0.6	10	2003-11-18 11:00:00	2003-11-18 11:45:00	2003-11-18 15:00:00	103.75	106	104.5	15946.9
279	2003-11-19 07:00:00	2003-11-19 07:30:00	2003-11-19 11:00:00	0.2	0.7	10.6	2003-11-19 07:00:00	2003-11-19 14:15:00	2003-11-19 17:00:00	90	120	107.5	309431
280	2003-11-19 18:00:00	2003-11-19 21:28:39	2003-11-20 01:00:00	0.2	1.2	11.3	2003-11-19 18:00:00	2003-11-19 23:30:00	2003-11-20 09:00:00	108	115	99	337770
281	2003-12-05 11:00:00	2003-12-06 14:30:02	2003-12-07 03:00:00	0.999945	17.4	0	2003-12-05 14:00:00	2003-12-06 19:15:00	2003-12-07 06:00:00	78	149	125	1734435
282	2004-01-30 05:30:00	2004-01-30 08:32:48	2004-01-31 05:00:00	3.5	23	0	2004-01-30 06:00:00	2004-01-31 10:45:00	2004-01-31 14:00:00	61.5	70	56	327860
283	2004-03-25 21:00:00	2004-03-26 00:30:03	2004-03-26 05:00:00	1.1999	6.6	0.2	2004-03-25 21:00:00	2004-03-25 21:15:00	2004-03-26 10:00:00	202.5	204	182	211855
284	2004-04-13 21:00:00	2004-04-13 21:30:18	2004-04-14 02:00:00	0.4	1.1	0	2004-04-13 21:00:00	2004-04-14 06:00:00	2004-04-14 18:00:00	234.75	275	242	1.69009e+06
285	2004-05-10 13:00:00	2004-05-10 21:29:57	2004-05-11 05:00:00	1.19986	10.4	0.1	2004-05-10 18:00:00	2004-05-11 01:45:00	2004-05-11 10:00:00	338	371	362	801338
286	2004-05-15 05:30:00	2004-05-15 21:30:03	2004-05-16 11:00:00	3.3996	16.5	24.4	2004-05-15 23:00:00	2004-05-16 12:15:00	2004-05-17 13:00:00	229.5	299	264	4.33933e+06
287	2004-05-16 18:15:00	2004-05-16 18:45:18	2004-05-16 22:00:00	0.4	1.2	30.4	2004-05-16 18:30:00	2004-05-16 18:30:00	2004-05-17 02:00:00	299	295	287	23040
288	2004-05-17 14:00:00	2004-05-18 07:30:02	2004-05-18 22:00:00	12.4944	29.4	31.6	2004-05-18 03:00:00	2004-05-18 16:30:00	2004-05-19 16:00:00	246	394	328	8.53469e+06
289	2004-05-19 13:00:00	2004-05-19 18:29:59	2004-05-19 19:00:00	0.612482	1.5	47.1	2004-05-19 13:15:00	2004-05-19 13:15:00	2004-05-19 22:00:00	340	340	315	6685.71
290	2004-05-21 08:15:00	2004-05-22 07:30:01	2004-05-23 19:00:00	5.8982	36.7	32.1	2004-05-21 13:00:00	2004-05-23 21:00:00	2004-05-24 19:00:00	310	403	336	10646100
291	2004-05-24 10:00:00	2004-05-24 17:30:02	2004-05-24 22:00:00	1.2	7.3	38.2	2004-05-24 10:15:00	2004-05-24 10:15:00	2004-05-25 13:00:00	371	367	328	177308
292	2004-05-26 12:00:00	2004-05-26 14:29:56	2004-05-27 08:00:00	0.399899	2.5	44	2004-05-26 20:00:00	2004-05-28 07:45:00	2004-05-30 11:00:00	300	462	417	2.81093e+07
293	2004-05-27 15:00:00	2004-05-28 10:29:58	2004-05-29 04:00:00	2.29922	28.5	9.8	2004-05-27 18:00:00	2004-05-28 19:00:00	2004-05-29 17:00:00	378	574	472	12230550
294	2004-06-10 06:00:00	2004-06-10 19:10:31	2004-06-10 20:00:00	0.1	1.1	0	2004-06-10 14:00:00	2004-06-11 03:15:00	2004-06-11 10:00:00	404.25	422	417	365600
295	2004-06-18 11:00:00	2004-06-18 12:30:01	2004-06-18 19:00:00	0.9999	3.5	0	2004-06-19 02:00:00	2004-06-19 07:15:00	2004-06-19 19:00:00	312	353	328	1.15354e+06
296	2004-06-26 13:00:00	2004-06-26 13:30:00	2004-06-26 18:00:00	0.1	0.5	0	2004-06-27 06:00:00	2004-06-27 06:45:00	2004-06-27 09:00:00	316	319	315	22050
297	2004-07-17 15:00:00	2004-07-17 20:29:59	2004-07-18 16:00:00	0.299998	2.7	0	2004-07-17 22:00:00	2004-07-18 23:15:00	2004-07-20 22:00:00	149.75	210	161	6.76349e+06
298	2004-08-16 12:00:00	2004-08-16 15:58:49	2004-08-16 19:00:00	0.2	1	0.4	2004-08-16 16:00:00	2004-08-17 06:30:00	2004-08-20 20:00:00	69.5	103	74	6142275
299	2004-08-25 11:00:00	2004-08-25 15:00:19	2004-08-25 18:00:00	0.2	0.8	0.9	2004-08-25 17:00:00	2004-08-25 22:45:00	2004-08-26 15:00:00	121.5	133	123	464190
300	2004-10-28 02:00:00	2004-10-28 12:30:05	2004-10-29 05:00:00	2.19967	12.7	5.4	2004-10-28 09:00:00	2004-10-28 18:45:00	2004-10-30 05:00:00	106	125	110	1.40772e+06
301	2004-10-30 12:00:00	2004-10-30 12:30:00	2004-10-30 18:00:00	0.1	0.7	12.7	2004-10-30 12:15:00	2004-10-30 12:15:00	2004-10-31 09:00:00	106	106	72	897652
302	2004-10-31 12:00:00	2004-10-31 12:30:00	2004-10-31 18:00:00	0.1	0.7	13.4	2004-10-31 12:00:00	2004-10-31 17:45:00	2004-11-01 05:00:00	74	103	59	1.34795e+06
303	2004-12-06 05:30:00	2004-12-08 07:30:01	2004-12-10 07:00:00	1.69986	46.7	0	2004-12-10 06:00:00	2004-12-10 08:45:00	2004-12-10 12:00:00	80.5	90	81.5	64762.5
304	2005-04-07 14:30:00	2005-04-07 18:30:01	2005-04-08 05:00:00	1.19987	7.5	9.5	2005-04-07 15:00:00	2005-04-07 21:15:00	2005-04-08 11:00:00	152.75	256	188	3.29091e+06
305	2005-04-23 14:00:00	2005-04-23 16:29:56	2005-04-23 17:00:00	0.199899	0.5	20.6	2005-04-23 14:00:00	2005-04-23 23:15:00	2005-04-24 13:00:00	175	268	185	3.38609e+06
306	2005-05-09 05:07:30	2005-05-09 11:30:00	2005-05-11 05:00:00	3.89989	23.3	18.7	2005-05-09 06:00:00	2005-05-09 20:15:00	2005-05-11 09:00:00	323	417	332	6.12601e+06
307	2005-05-18 03:00:00	2005-05-18 21:30:03	2005-05-19 08:00:00	3.19926	33.5	16.1	2005-05-18 08:00:00	2005-05-19 16:30:00	2005-05-20 16:00:00	454.5	823	656	2.15697e+07
308	2005-05-29 05:30:00	2005-05-29 12:29:58	2005-05-30 04:00:00	1.89989	19.2	0	2005-05-29 06:00:00	2005-05-29 15:30:00	2005-05-30 05:00:00	500.5	519	514	317607
309	2005-05-31 13:30:00	2005-05-31 21:29:59	2005-06-01 21:00:00	1.49998	9.9	19.2	2005-05-31 20:00:00	2005-06-01 13:00:00	2005-06-03 03:00:00	467	674	477	2.17073e+07
310	2005-06-05 10:00:00	2005-06-05 11:30:01	2005-06-05 17:00:00	0.399901	1.5	9.9	2005-06-05 15:00:00	2005-06-06 01:00:00	2005-06-06 22:00:00	382.5	437	376	3.84557e+06
311	2005-06-16 06:00:00	2005-06-16 06:30:00	2005-06-16 13:00:00	0.1	0.5	1	2005-06-16 06:00:00	2005-06-17 12:45:00	2005-06-18 14:00:00	299	349	332	2.86616e+06
312	2005-06-18 01:00:00	2005-06-18 01:30:00	2005-06-18 05:00:00	0.1	0.5	2.9	2005-06-18 01:15:00	2005-06-18 01:15:00	2005-06-18 07:00:00	353	353	340	39952.2
313	2005-06-25 14:10:00	2005-06-25 14:40:00	2005-06-25 18:00:00	0.508333	0.8	0.7	2005-06-25 17:00:00	2005-06-25 19:30:00	2005-06-26 03:00:00	300	323	315	374063
314	2005-06-26 12:20:00	2005-06-26 13:29:58	2005-06-26 17:00:00	0.399966	1	1.5	2005-06-26 15:00:00	2005-06-27 16:00:00	2005-06-29 09:00:00	317	332	319	4.45933e+06
315	2005-06-27 08:30:00	2005-06-27 11:29:59	2005-06-27 19:00:00	0.599996	2.4	2.5	2005-06-27 12:00:00	2005-06-28 06:30:00	2005-06-28 21:00:00	310	376	340	3.0411e+06
316	2005-07-09 15:30:00	2005-07-09 16:00:00	2005-07-09 18:00:00	0.2	0.5	0	2005-07-09 19:00:00	2005-07-10 12:30:00	2005-07-11 22:00:00	185.75	201	175	2.30964e+06
317	2005-09-16 21:00:00	2005-09-17 06:38:11	2005-09-17 23:00:00	0.4	4.6	0.2	2005-09-17 05:00:00	2005-09-18 09:45:00	2005-09-20 03:00:00	66	82	68	1.98357e+06
318	2005-10-27 21:00:00	2005-10-27 21:30:00	2005-10-28	0.1	0.3	0	2005-10-27 21:00:00	2005-10-27 21:15:00	2005-10-28 11:00:00	90	90	88	44292.9
319	2005-10-31 05:30:00	2005-10-31 09:30:01	2005-10-31 11:00:00	0.499904	1.2	0.3	2005-10-31 12:00:00	2005-11-01 06:00:00	2005-11-01 16:00:00	75.5	80	78.5	86882.1
320	2005-11-01 11:04:00	2005-11-01 15:29:58	2005-11-02 05:00:00	1.49947	9.9	1.5	2005-11-01 17:00:00	2005-11-02 13:30:00	2005-11-03 14:00:00	80	118	101	2587515
321	2005-11-05 16:00:00	2005-11-06 11:30:04	2005-11-08 05:00:00	4.29832	46.7	27.5	2005-11-05 16:00:00	2005-11-08 05:00:00	2005-11-09 06:00:00	90.5	155	97.5	6.27131e+06
322	2005-11-13 03:00:00	2005-11-14 03:49:24	2005-11-14 11:00:00	0.6	7.7	4.7	2005-11-13 11:00:00	2005-11-13 18:15:00	2005-11-14 15:00:00	65.25	108	82	2.01602e+06
323	2006-04-09 14:00:00	2006-04-09 21:30:02	2006-04-10	0.1	0.9	13.5	2006-04-09 15:00:00	2006-04-10 19:45:00	2006-04-11 04:00:00	155.75	161	158	164171
324	2006-04-14 07:00:00	2006-04-14 19:30:02	2006-04-14 23:00:00	0.399938	2.7	0.9	2006-04-14 11:00:00	2006-04-15 19:15:00	2006-04-16 11:00:00	232	353	311	5.85156e+06
325	2006-04-29 15:00:00	2006-04-29 15:30:00	2006-04-30	0.2	0.7	0.3	2006-04-29 15:00:00	2006-04-30 22:00:00	2006-05-01 10:00:00	614	995	662	2.21471e+07
326	2006-05-20 03:00:00	2006-05-20 07:29:58	2006-05-20 08:00:00	0.499965	1.2	0	2006-05-20 03:00:00	2006-05-21 07:45:00	2006-05-22 02:00:00	1277.5	1490	1310	18070875
327	2006-06-04 09:00:00	2006-06-04 09:30:00	2006-06-04 14:00:00	0.1	0.6	11.9	2006-06-04 10:00:00	2006-06-05 11:30:00	2006-06-05 19:00:00	908.75	951	914	1.22646e+06
328	2006-06-07 05:30:00	2006-06-07 06:00:00	2006-06-07 07:00:00	0.2	0.4	12.5	2006-06-07 06:00:00	2006-06-08 06:45:00	2006-06-11 02:00:00	914	1020	830	4.16448e+07
329	2006-06-08 10:00:00	2006-06-08 14:07:56	2006-06-08 18:00:00	0.3	2	18.9	2006-06-08 10:00:00	2006-06-08 13:45:00	2006-06-09	1057.5	1080	1070	570375
330	2006-06-09 05:12:00	2006-06-09 12:30:00	2006-06-09 21:00:00	2.1999	19.4	9	2006-06-09 13:00:00	2006-06-09 16:45:00	2006-06-11 02:00:00	1062.5	1080	830	4.17473e+06
331	2006-06-13 16:01:45	2006-06-13 16:31:45	2006-06-13 20:00:00	3.34976	6.4	21.4	2006-06-13 21:00:00	2006-06-14 13:00:00	2006-06-16 01:00:00	721	830	711	1.33263e+07
332	2006-10-04	2006-10-04 02:30:02	2006-10-04 04:00:00	0.1	0.4	0	2006-10-04 04:00:00	2006-10-04 21:15:00	2006-10-13 07:00:00	85	108	90	1.81634e+07
333	2006-10-05 15:00:00	2006-10-05 15:30:00	2006-10-05 18:00:00	0.1	0.4	0.4	2006-10-05 15:15:00	2006-10-05 15:15:00	2006-10-05 19:00:00	103	103	99	9360
334	2006-10-06 14:00:00	2006-10-06 20:30:01	2006-10-07 05:00:00	0.999968	6.3	0.8	2006-10-06 22:00:00	2006-10-07 06:15:00	2006-10-08 06:00:00	98.5	228	128	5.95486e+06
335	2006-10-15 12:00:00	2006-10-15 12:30:00	2006-10-16 05:00:00	0.3	2.3	0	2006-10-15 15:00:00	2006-10-16 05:45:00	2006-10-18 05:00:00	90	128	99	3.75265e+06
336	2006-11-02 15:00:00	2006-11-02 16:30:01	2006-11-03 02:00:00	0.399934	1.4	0	2006-11-02 15:00:00	2006-11-03 19:00:00	2006-11-04 09:00:00	102.5	120	113	463106
337	2006-11-05 21:00:00	2006-11-06 04:20:13	2006-11-06 05:00:00	0.2	1.2	2.2	2006-11-06 04:00:00	2006-11-07 01:30:00	2006-11-10 11:00:00	129	214	162	4.69405e+07
338	2006-11-07 19:00:00	2006-11-07 21:30:02	2006-11-08 11:00:00	0.599934	3.9	3.4	2006-11-07 21:00:00	2006-11-08 10:00:00	2006-11-10 11:00:00	205.5	557	162	3.21305e+07
339	2006-11-13	2006-11-13 00:30:00	2006-11-13 05:00:00	0.1	0.6	3.9	2006-11-13 02:00:00	2006-11-13 03:15:00	2006-11-13 06:00:00	155	158	155	21600
340	2006-11-13 17:00:00	2006-11-13 17:30:00	2006-11-14	0.1	0.8	4.5	2006-11-13 18:00:00	2006-11-13 18:30:00	2006-11-14 03:00:00	153.5	155	146	123338
341	2006-11-20 07:00:00	2006-11-20 09:29:56	2006-11-20 11:00:00	0.299899	0.9	1.3	2006-11-20 11:00:00	2006-11-21 11:00:00	2006-11-22 12:00:00	127.25	303	207	1.00167e+07
342	2006-11-20 18:00:00	2006-11-21 00:30:01	2006-11-21 20:00:00	0.799938	6.4	2.2	2006-11-20 19:00:00	2006-11-21 13:15:00	2006-11-22 12:00:00	137.5	349	207	1.01559e+07
343	2006-12-13 04:00:00	2006-12-13 11:30:02	2006-12-13 13:00:00	0.499936	3.2	2.1	2006-12-13 04:00:00	2006-12-13 13:30:00	2006-12-13 16:00:00	109.5	118	115	31462.5
344	2006-12-13 20:00:00	2006-12-14 07:46:08	2006-12-14 16:00:00	0.2	3.5	5.3	2006-12-14 13:00:00	2006-12-15 07:45:00	2006-12-15 13:00:00	114.5	144	136	420694
345	2007-03-31 19:00:00	2007-03-31 19:30:00	2007-03-31 21:00:00	0.1	0.3	0.3	2007-03-31 19:00:00	2007-03-31 19:15:00	2007-04-01 10:00:00	256	256	204	156420
346	2007-04-01 19:00:00	2007-04-01 19:30:00	2007-04-02 06:00:00	0.1	0.7	0.6	2007-04-01 19:00:00	2007-04-01 19:15:00	2007-04-02 08:00:00	235	235	197	133338
347	2007-05-02 11:00:00	2007-05-02 21:29:59	2007-05-03 17:00:00	0.799996	8.3	0	2007-05-02 18:00:00	2007-05-03 04:30:00	2007-05-04 14:00:00	463.25	557	442	8.60501e+06
348	2007-05-20 06:00:00	2007-05-21 14:29:25	2007-05-22 05:00:00	0.6	6.9	0	2007-05-20 08:00:00	2007-05-21 11:00:00	2007-05-22 10:00:00	595.5	662	580	7.10119e+06
349	2007-06-10 06:00:00	2007-06-10 08:55:29	2007-06-10 16:00:00	0.4	1.9	0.5	2007-06-10 08:00:00	2007-06-11 03:00:00	2007-06-12 07:00:00	290	472	385	1.13122e+07
350	2007-08-20 16:00:00	2007-08-20 18:28:50	2007-08-20 22:00:00	0.2	1.1	0	2007-08-20 18:00:00	2007-08-21 00:30:00	2007-08-23 20:00:00	62	74	64	1.39861e+06
351	2007-10-19 05:00:56	2007-10-19 07:29:58	2007-10-20 19:00:00	8.19774	82.4	0	2007-10-19 06:00:00	2007-10-19 19:45:00	2007-10-21 14:00:00	149.25	530	185	3.13889e+07
352	2007-10-29 15:15:00	2007-10-29 18:30:01	2007-10-29 21:00:00	3.69876	10.5	0	2007-10-30 02:00:00	2007-10-30 12:30:00	2007-10-31 15:00:00	120	152	125	2.16063e+06
353	2007-11-16	2007-11-16 01:30:01	2007-11-16 20:00:00	0.499901	1.9	2.8	2007-11-16 02:00:00	2007-11-17 20:00:00	2007-11-20 11:00:00	120.75	260	172	3.36121e+07
354	2007-11-17 07:30:00	2007-11-17 19:29:58	2007-11-18 19:00:00	0.499924	5	4.7	2007-11-17 10:00:00	2007-11-18 20:30:00	2007-11-19 13:00:00	160.75	349	271	1.39045e+07
355	2007-12-03 05:03:31	2007-12-03 18:29:57	2007-12-04 13:00:00	1.7993	12.1	0.1	2007-12-04 01:00:00	2007-12-04 17:30:00	2007-12-05 02:00:00	125	146	138	378684
356	2008-05-20 17:30:00	2008-05-20 20:35:42	2008-05-21 05:00:00	0.5	2.5	0	2008-05-20 19:00:00	2008-05-21 07:15:00	2008-05-23 02:00:00	1002.5	1210	844	2.22478e+07
357	2008-05-26 13:00:00	2008-05-26 16:29:57	2008-05-27 18:00:00	0.799864	6.7	3.2	2008-05-26 22:00:00	2008-05-28 16:30:00	2008-05-29 05:00:00	660.5	865	810	9.06211e+06
358	2008-10-03 19:30:00	2008-10-03 20:29:57	2008-10-04 14:00:00	1.3992	6.3	0	2008-10-03 20:00:00	2008-10-04 23:45:00	2008-10-07 16:00:00	85.275	103	88.95	2.33459e+06
359	2008-11-01 09:00:00	2008-11-02 07:30:02	2008-11-04 19:00:00	7.79761	54	0	2008-11-01 09:00:00	2008-11-02 14:45:00	2008-11-04 20:00:00	85.8	175	116.5	7.98136e+06
360	2008-11-06 13:00:00	2008-11-06 19:30:01	2008-11-07 05:00:00	0.199954	1.2	54	2008-11-06 13:00:00	2008-11-06 17:15:00	2008-11-07 06:00:00	94.3	118	103.75	562460
361	2008-11-08 19:00:00	2008-11-09 07:37:21	2008-11-09 21:00:00	0.4	6.1	1.2	2008-11-08 19:00:00	2008-11-09 20:15:00	2008-11-10 04:00:00	109	130	124	196466
362	2008-11-11 12:30:00	2008-11-11 13:00:00	2008-11-11 16:00:00	0.2	0.6	7.3	2008-11-11 12:45:00	2008-11-11 15:00:00	2008-11-11 19:00:00	103	106	101.5	16578
363	2008-11-12 02:00:00	2008-11-13 05:29:56	2008-11-13 09:00:00	1.99898	14.3	7.9	2008-11-12 04:00:00	2008-11-13 10:15:00	2008-11-14 13:00:00	100.95	224	132.25	8.90506e+06
364	2008-12-02 05:10:00	2008-12-02 09:29:57	2008-12-03 05:00:00	1.19961	9.2	0	2008-12-02 06:00:00	2008-12-02 17:45:00	2008-12-03 07:00:00	93.2	103	94.85	352150
365	2009-02-25 11:00:00	2009-02-25 12:30:01	2009-02-25 17:00:00	0.299967	1.3	12.1	2009-02-25 11:00:00	2009-02-25 14:30:00	2009-02-25 20:00:00	79.625	85.8	79.1	82428.8
366	2009-04-13 17:00:00	2009-04-13 17:30:00	2009-04-13 19:00:00	0.1	0.3	21.8	2009-04-13 17:00:00	2009-04-13 21:00:00	2009-04-14 04:00:00	130.75	144	133	233126
367	2009-04-14 02:00:00	2009-04-14 04:29:56	2009-04-14 05:00:00	1.3997	3.1	22.1	2009-04-14 02:15:00	2009-04-14 02:30:00	2009-04-14 13:00:00	136	138	128.25	34359.6
368	2009-04-15 08:00:00	2009-04-15 08:30:00	2009-04-15 11:00:00	0.1	0.4	10.1	2009-04-15 10:00:00	2009-04-15 19:15:00	2009-04-15 21:00:00	120.5	128	125.25	19651.7
369	2009-04-16 15:00:00	2009-04-16 15:30:00	2009-04-17 01:00:00	0.1	0.4	7.8	2009-04-16 15:00:00	2009-04-17 22:00:00	2009-04-18 08:00:00	124.75	182	164.5	1.79914e+06
370	2009-04-30 05:30:00	2009-04-30 12:29:58	2009-04-30 20:00:00	0.299964	1.7	6.5	2009-04-30 11:00:00	2009-05-01 20:00:00	2009-05-02 11:00:00	242.5	319	246.25	3.45749e+06
371	2009-05-02 05:30:00	2009-05-02 09:30:01	2009-05-02 17:00:00	0.999967	7.1	8.2	2009-05-02 12:00:00	2009-05-03 17:00:00	2009-05-04 11:00:00	250	340	264.75	7.51482e+06
372	2009-05-03 01:00:00	2009-05-03 09:30:03	2009-05-03 20:00:00	2.69902	13.5	15.3	2009-05-03 12:00:00	2009-05-03 21:30:00	2009-05-04 11:00:00	253.5	432	264.75	6.16287e+06
373	2009-05-04 15:00:00	2009-05-05 05:30:04	2009-05-05 19:00:00	1.89845	17.1	22.3	2009-05-04 15:00:00	2009-05-05 21:30:00	2009-05-06 11:00:00	306	638	404.5	1.39377e+07
374	2009-05-06 06:00:00	2009-05-06 17:30:01	2009-05-06 22:00:00	1.59991	10.5	37.7	2009-05-06 12:00:00	2009-05-07 00:45:00	2009-05-07 13:00:00	413.75	737	465.75	9.95178e+06
375	2009-05-12 13:00:00	2009-05-12 15:28:50	2009-05-12 21:00:00	0.2	1.3	1.1	2009-05-12 13:15:00	2009-05-12 13:30:00	2009-05-13 01:00:00	394	403	362.25	220940
376	2009-06-01 14:04:36	2009-06-01 15:29:54	2009-06-01 17:00:00	4.89442	7.7	0.7	2009-06-01 17:00:00	2009-06-02	2009-06-02 01:00:00	939.75	995	948.75	321806
377	2009-06-10 12:00:00	2009-06-11 16:29:57	2009-06-12 15:00:00	0.599922	8.1	31.6	2009-06-10 13:00:00	2009-06-13 00:45:00	2009-06-13 03:00:00	639.5	686	651.5	1.1804e+06
378	2009-06-16 14:00:00	2009-06-16 14:30:00	2009-06-16 18:00:00	0.1	0.5	5.2	2009-06-16 15:00:00	2009-06-17 17:00:00	2009-06-17 21:00:00	636.5	686	668	284029
379	2009-06-17 05:30:00	2009-06-17 13:29:59	2009-06-17 20:00:00	0.599997	3.7	5.7	2009-06-17 07:00:00	2009-06-18 03:45:00	2009-06-18 08:00:00	645.5	705	656	1542537
380	2009-06-19 14:00:00	2009-06-20 04:29:58	2009-06-20 18:00:00	0.599883	3.8	4.2	2009-06-19 20:00:00	2009-06-20 10:00:00	2009-06-20 19:00:00	586.5	626	602.5	690437
381	2009-06-21 08:00:00	2009-06-21 15:30:02	2009-06-22 05:00:00	1.89955	14.6	8	2009-06-21 12:00:00	2009-06-22 04:30:00	2009-06-22 09:00:00	572.75	711	672.5	1.89703e+06
382	2009-08-04 05:20:00	2009-08-04 17:29:59	2009-08-05 12:00:00	1.99992	9.3	0	2009-08-04 07:00:00	2009-08-06 10:45:00	2009-08-11 22:00:00	122.25	136	119.5	1.52981e+07
383	2009-08-05 20:15:00	2009-08-05 22:30:00	2009-08-06 02:00:00	2.69995	7.8	9.3	2009-08-05 21:00:00	2009-08-06 21:45:00	2009-08-11 22:00:00	114	169	119.5	1.71385e+07
384	2009-08-06 10:05:00	2009-08-06 11:30:00	2009-08-07 17:00:00	10.0984	42.3	17.1	2009-08-06 12:00:00	2009-08-07 15:45:00	2009-08-09 07:00:00	136.75	197	151.25	6.10071e+06
385	2009-08-29 19:00:00	2009-08-30 01:30:01	2009-08-30 23:00:00	3.29963	34.6	0	2009-08-29 21:00:00	2009-08-30 17:15:00	2009-09-02	88.95	149	103	6.50535e+06
386	2009-10-13 16:00:00	2009-10-14 17:29:59	2009-10-15	0.69997	7.9	0	2009-10-13 16:00:00	2009-10-15 04:15:00	2009-10-16 22:00:00	97.075	221	126.5	1.14918e+07
387	2009-10-18 19:00:00	2009-10-19 05:29:59	2009-10-19 08:00:00	0.79998	2.7	8	2009-10-18 19:00:00	2009-10-19 14:15:00	2009-10-20 21:00:00	109.25	141	116.5	2.41976e+06
388	2009-10-23 15:30:00	2009-10-23 16:29:57	2009-10-23 20:00:00	0.299933	0.9	2.7	2009-10-23 16:00:00	2009-10-24 13:00:00	2009-10-25 08:00:00	102.5	125	101.7	1.54711e+06
389	2009-11-07 02:00:00	2009-11-07 03:30:01	2009-11-07 05:00:00	0.199967	0.5	10	2009-11-07 02:15:00	2009-11-07 02:45:00	2009-11-07 09:00:00	113	115	101.45	29482.5
390	2009-11-07 22:00:00	2009-11-08 03:29:59	2009-11-08 05:00:00	0.199997	0.7	10.5	2009-11-07 22:15:00	2009-11-07 22:15:00	2009-11-08 08:00:00	103	106	98.775	21813.8
391	2009-11-13 22:00:00	2009-11-14 05:30:02	2009-11-14 10:00:00	0.699936	3.6	27.6	2009-11-14 01:00:00	2009-11-14 12:30:00	2009-11-14 14:00:00	88.95	103	89.475	100740
392	2009-12-20 21:00:00	2009-12-20 22:53:03	2009-12-21 05:00:00	0.4	1.8	6.9	2009-12-20 21:00:00	2009-12-21 17:00:00	2009-12-21 23:00:00	94.3	101	93.2	126422
393	2010-01-18 22:30:00	2010-01-19 04:38:16	2010-01-19 08:00:00	0.4	3.1	5	2010-01-18 22:45:00	2010-01-18 23:45:00	2010-01-19 09:00:00	85.8	87.9	81.125	43169.3
394	2010-04-12 06:00:00	2010-04-12 15:29:58	2010-04-12 19:00:00	0.499963	3.2	2.9	2010-04-12 11:00:00	2010-04-12 18:30:00	2010-04-12 22:00:00	78.1	92.1	87.375	81462.8
395	2010-04-13 08:00:00	2010-04-13 13:30:05	2010-04-13 19:00:00	0.3	2.3	6	2010-04-13 09:00:00	2010-04-14 18:30:00	2010-04-14 21:00:00	84.75	92.1	88.95	25908.8
396	2010-04-27 05:20:00	2010-04-27 15:30:03	2010-04-29 05:00:00	3.89941	30.4	3.8	2010-04-27 10:00:00	2010-04-28 00:45:00	2010-04-29 11:00:00	299	508	257.25	1.34199e+07
397	2010-05-10 11:00:00	2010-05-10 19:29:57	2010-05-10 23:00:00	0.29993	1.7	1.9	2010-05-10 14:00:00	2010-05-11 02:15:00	2010-05-11 07:00:00	182.75	214	199	410211
398	2010-05-19 06:00:00	2010-05-19 06:30:00	2010-05-19 10:00:00	0.1	0.5	0.3	2010-05-19 07:00:00	2010-05-19 23:45:00	2010-05-21 18:00:00	384.75	403	396.5	2.1272e+06
399	2010-05-19 23:20:00	2010-05-20 03:29:56	2010-05-20 05:00:00	1.49959	5	0.8	2010-05-19 23:35:00	2010-05-21 00:45:00	2010-05-21 04:00:00	399	462	434.5	477900
400	2010-06-02 08:00:00	2010-06-02 18:31:48	2010-06-03 07:00:00	2.7	26.7	27.3	2010-06-02 10:00:00	2010-06-03 18:30:00	2010-06-10 06:00:00	430.75	1170	974.5	3.64625e+08
401	2010-06-03 19:00:00	2010-06-04 05:29:59	2010-06-05 02:00:00	5.09985	51.3	30.2	2010-06-03 23:00:00	2010-06-05 03:30:00	2010-06-06 03:00:00	1072.5	2210	1385	7.56021e+07
402	2010-06-14 22:30:00	2010-06-15 22:30:00	2010-06-16 23:00:00	1.09983	14.4	6.8	2010-06-15 01:00:00	2010-06-16 19:45:00	2010-06-17 03:00:00	628.5	760	684.5	6.75734e+06
403	2010-06-25 07:00:00	2010-06-25 13:30:01	2010-06-26 04:00:00	0.399969	3.3	0	2010-06-25 08:00:00	2010-06-26 06:30:00	2010-06-26 10:00:00	496	577	554.75	576182
404	2010-08-06 11:10:00	2010-08-06 14:29:56	2010-08-06 23:00:00	3.79838	9.3	0	2010-08-06 12:00:00	2010-08-06 13:30:00	2010-08-07 08:00:00	116.5	119	114	39318.8
405	2010-08-08 20:00:00	2010-08-10 00:30:03	2010-08-10 05:00:00	2.69857	17.5	9.4	2010-08-08 20:00:00	2010-08-10 05:30:00	2010-08-13 21:00:00	107	152	115	7.59657e+06
406	2010-08-29 05:12:00	2010-08-29 07:30:00	2010-08-31 10:00:00	1.19992	9.2	0	2010-08-29 06:00:00	2010-08-31 18:15:00	2010-09-03 21:00:00	84.15	112	91	6.35128e+06
407	2010-10-03 14:30:00	2010-10-03 16:30:04	2010-10-03 19:00:00	0.3	1.1	0	2010-10-03 15:00:00	2010-10-04 19:00:00	2010-10-08 22:00:00	84.6	100	88.2	2.83766e+06
408	2010-10-04 08:20:00	2010-10-04 11:29:55	2010-10-05 21:00:00	2.79917	20.3	1.1	2010-10-04 09:00:00	2010-10-04 23:30:00	2010-10-07 11:00:00	85.025	104	89.15	2.15475e+06
409	2010-10-23 07:00:00	2010-10-23 07:30:00	2010-10-23 17:00:00	0.1	0.6	0	2010-10-23 07:00:00	2010-10-24 17:00:00	2010-10-27 06:00:00	81.5	214	111.5	1.59836e+07
410	2010-10-24 02:00:00	2010-10-24 13:30:01	2010-10-26 22:00:00	7.79904	63.2	0.6	2010-10-24 03:00:00	2010-10-24 20:00:00	2010-10-27 06:00:00	87.275	300	111.5	1.60481e+07
411	2010-10-30 12:00:00	2010-10-30 15:29:57	2010-10-30 17:00:00	0.199932	0.7	0	2010-10-30 14:00:00	2010-10-31 16:45:00	2010-11-01 17:00:00	101.5	126	107	1.28731e+06
412	2010-11-07 11:00:00	2010-11-07 23:30:02	2010-11-08 05:00:00	1.89962	12.3	0	2010-11-07 12:00:00	2010-11-08 05:15:00	2010-11-09 13:00:00	100.5	149	100.05	4.08151e+06
413	2010-11-15 17:00:00	2010-11-16 05:15:00	2010-11-16 17:00:00	1	7.9	1	2010-11-15 18:00:00	2010-11-16 07:00:00	2010-11-17 02:00:00	100.5	110	99.55	529607
414	2010-12-09 20:00:00	2010-12-10 05:29:58	2010-12-10 07:00:00	2.19945	8.9	11.6	2010-12-09 20:15:00	2010-12-09 20:30:00	2010-12-10 08:00:00	98.2	100	97.2	41321.5
415	2010-12-11 12:00:00	2010-12-11 18:45:02	2010-12-12 05:00:00	1	8.5	21.9	2010-12-11 12:00:00	2010-12-11 15:00:00	2010-12-12 06:00:00	91.45	106	97.65	266715
416	2010-12-13 19:00:00	2010-12-14 07:30:02	2010-12-14 17:00:00	3.19938	19.3	20.9	2010-12-13 19:00:00	2010-12-14 13:45:00	2010-12-14 22:00:00	106	123	110	489300
417	2011-03-09 11:00:00	2011-03-09 11:30:00	2011-03-09 15:00:00	0.2	0.7	24.7	2011-03-09 11:00:00	2011-03-09 14:45:00	2011-03-09 23:00:00	78.95	112	84.15	500355
418	2011-03-10 10:00:00	2011-03-10 16:29:55	2011-03-11 03:00:00	3.49874	18.4	17.7	2011-03-10 10:00:00	2011-03-10 16:15:00	2011-03-11 08:00:00	82.4	88.7	73.425	372733
419	2011-03-13 19:00:00	2011-03-14 01:30:01	2011-03-14 17:00:00	1.89966	8	20.8	2011-03-13 21:00:00	2011-03-15 14:15:00	2011-03-15 18:00:00	85.475	96.2	89.125	56190.8
420	2011-03-15 04:00:00	2011-03-15 19:30:05	2011-03-17 02:00:00	4.29786	57.5	27.3	2011-03-15 07:00:00	2011-03-16 02:15:00	2011-03-17 09:00:00	75.075	104	84.15	2.05698e+06
421	2011-05-08 01:00:00	2011-05-09 01:30:10	2011-05-09 05:00:00	0.3	3	22.5	2011-05-08 10:00:00	2011-05-08 19:00:00	2011-05-09 10:00:00	430	646	423	6.93402e+06
422	2011-05-15 07:30:00	2011-05-15 15:30:05	2011-05-16 02:00:00	2.2	14.5	0.2	2011-05-15 14:00:00	2011-05-16 01:15:00	2011-05-16 12:00:00	733.75	1050	751.5	9.9383e+06
423	2011-05-25 14:00:00	2011-05-25 19:30:05	2011-05-26 23:00:00	4.29947	22.5	9.5	2011-05-25 15:00:00	2011-05-26 06:30:00	2011-05-27 04:00:00	650.5	936	689.25	1.35295e+07
424	2011-06-06 09:00:00	2011-06-06 16:29:56	2011-06-07 15:00:00	2.69867	14	27.6	2011-06-06 12:00:00	2011-06-08 11:30:00	2011-06-10 15:00:00	530.25	766	703.25	2.98144e+07
425	2011-06-22 21:04:00	2011-06-22 23:30:01	2011-06-23 01:00:00	2.49947	7.1	4.3	2011-06-22 22:00:00	2011-06-23 23:00:00	2011-06-26 03:00:00	766.75	974	899.5	3.21801e+07
426	2011-10-04 05:15:00	2011-10-05 04:29:55	2011-10-06 17:00:00	4.99944	68.3	0	2011-10-04 06:00:00	2011-10-05 18:30:00	2011-10-08 10:00:00	96.7	223	126.25	1.23162e+07
427	2011-10-10 08:00:00	2011-10-11 12:29:57	2011-10-11 21:00:00	2.49858	35	0	2011-10-10 09:00:00	2011-10-11 14:45:00	2011-10-13 08:00:00	115	267	145.5	1.08452e+07
428	2011-10-16 05:30:00	2011-10-16 10:30:02	2011-10-16 19:00:00	3.7998	19.2	35	2011-10-16 08:00:00	2011-10-16 19:45:00	2011-10-18 04:00:00	128	208	147.5	5.33567e+06
429	2011-10-30 23:30:00	2011-10-31 10:29:57	2011-10-31 12:00:00	1.19972	5.9	0	2011-10-31 01:00:00	2011-10-31 16:15:00	2011-11-01 09:00:00	114	140	117.25	1.16237e+06
430	2011-10-31 22:00:00	2011-10-31 23:37:02	2011-11-01 04:00:00	1.4	5.7	5.9	2011-10-31 22:00:00	2011-10-31 22:30:00	2011-11-01 09:00:00	130.5	132	117.25	65684.7
431	2011-11-16 19:00:00	2011-11-17 13:29:57	2011-11-19	3.2992	34.2	19.7	2011-11-16 19:00:00	2011-11-17 16:00:00	2011-11-19 04:00:00	98.15	121	100.5	1.46437e+06
432	2011-11-22 03:00:00	2011-11-22 06:30:03	2011-11-22 21:00:00	0.999899	9.8	34.2	2011-11-22 05:00:00	2011-11-22 13:15:00	2011-11-22 22:00:00	107.5	115	107.5	106650
433	2011-11-24 12:00:00	2011-11-25 05:30:02	2011-11-25 17:00:00	1.39994	10	9.8	2011-11-24 13:00:00	2011-11-26 17:00:00	2011-11-27 01:00:00	107	123	85.025	1.11875e+06
434	2012-03-28	2012-03-28 05:30:05	2012-03-28 19:00:00	2.69868	18.9	3.6	2012-03-28 02:00:00	2012-03-28 08:00:00	2012-03-28 20:00:00	140.5	144	139.5	78500
435	2012-03-29 08:00:00	2012-03-31 00:29:59	2012-04-01 18:00:00	3.79976	62.7	22.3	2012-03-29 09:00:00	2012-03-31 19:00:00	2012-04-01 19:00:00	120.75	404	294.75	9.2451e+06
436	2012-04-17 19:30:00	2012-04-17 22:29:59	2012-04-18 05:00:00	3.69999	16.8	10.4	2012-04-17 20:00:00	2012-04-18 20:15:00	2012-04-19 04:00:00	413.5	491	349	3.31272e+06
437	2012-04-19 19:00:00	2012-04-19 19:30:00	2012-04-20 04:00:00	0.2	0.8	27.2	2012-04-19 19:00:00	2012-04-20 20:45:00	2012-04-21 10:00:00	429.75	793	411.5	1.12879e+07
438	2012-04-25 17:10:00	2012-04-26 11:30:02	2012-04-27 20:00:00	6.79928	81.5	8.4	2012-04-25 18:00:00	2012-04-26 20:45:00	2012-04-28 03:00:00	737	1500	921	5.62565e+07
439	2012-04-30 07:20:00	2012-04-30 09:29:53	2012-05-01 01:00:00	1.79841	13.7	88.9	2012-04-30 14:00:00	2012-05-01 04:15:00	2012-05-01 07:00:00	634.25	800	741.75	1.79171e+06
440	2012-05-21 20:30:00	2012-05-22 10:30:01	2012-05-23 11:00:00	2.19986	21.5	0	2012-05-21 21:00:00	2012-05-22 21:15:00	2012-05-23 17:00:00	759.75	1000	932	1.12609e+07
441	2012-06-02 02:00:00	2012-06-02 02:30:00	2012-06-02 10:00:00	1.4	4.5	0	2012-06-02 02:00:00	2012-06-03 08:30:00	2012-06-07 07:00:00	598	821	761.5	8.51215e+07
442	2012-10-15 05:30:00	2012-10-16 04:29:59	2012-10-16 11:00:00	3.99998	29.4	0	2012-10-15 06:00:00	2012-10-16 14:00:00	2012-10-17 22:00:00	89.15	176	109	5.81126e+06
443	2012-10-19 11:30:00	2012-10-19 23:29:58	2012-10-20 05:00:00	1.19992	11.4	29.4	2012-10-19 12:00:00	2012-10-20 10:30:00	2012-10-21 15:00:00	101	132	107.5	1.98034e+06
444	2012-10-24 16:00:00	2012-10-24 19:29:57	2012-10-25 16:00:00	0.199932	2.4	39.4	2012-10-24 16:00:00	2012-10-24 21:15:00	2012-10-25 21:00:00	109	117	109	147150
445	2012-10-27 10:00:00	2012-10-27 23:29:57	2012-10-29 07:00:00	2.79846	29.3	31.2	2012-10-27 12:00:00	2012-10-29 03:45:00	2012-10-31 16:00:00	104	282	147.25	2.24077e+07
446	2012-11-08 03:00:00	2012-11-08 05:30:02	2012-11-09	2.89954	16.8	0	2012-11-08 04:00:00	2012-11-08 21:00:00	2012-11-09 09:00:00	118	155	136.25	959291
447	2012-11-17 01:00:00	2012-11-17 22:30:00	2012-11-18 05:00:00	2.19987	12.7	1	2012-11-17 06:00:00	2012-11-18 04:15:00	2012-11-19 01:00:00	105.5	135	116.5	1696950
448	2012-11-19 00:30:00	2012-11-19 01:00:00	2012-11-19 05:00:00	0.2	0.8	13.7	2012-11-19 02:00:00	2012-11-19 17:00:00	2012-11-19 19:00:00	117.5	128	118.5	44550
449	2012-11-20 07:00:00	2012-11-21 05:30:02	2012-11-22 01:00:00	4.3	36.9	14.5	2012-11-20 08:00:00	2012-11-21 10:45:00	2012-11-22 09:00:00	118.5	202	126.5	7.84891e+06
450	2012-11-29 22:00:00	2012-12-02 09:36:52	2012-12-02 17:00:00	3.5	66.6	21.5	2012-11-29 23:00:00	2012-12-02 15:15:00	2012-12-03 08:00:00	116	528	257.75	12898125
451	2012-12-04 05:05:27	2012-12-05 05:30:00	2012-12-06 05:00:00	4.29977	29.6	68.6	2012-12-04 08:00:00	2012-12-05 15:00:00	2012-12-06 11:00:00	176.75	352	222.25	1.11557e+07
452	2012-12-07 08:00:00	2012-12-07 23:45:49	2012-12-08 04:00:00	0.2	2.7	29.8	2012-12-07 08:00:00	2012-12-07 18:30:00	2012-12-08 10:00:00	173.75	181	130	1.31193e+06
453	2012-12-08 14:00:00	2012-12-08 18:12:38	2012-12-09 02:00:00	0.3	2.5	32.5	2012-12-08 14:00:00	2012-12-08 21:00:00	2012-12-09 10:00:00	134.75	152	97.65	1.02311e+06
454	2012-12-09 22:00:00	2012-12-10 03:20:34	2012-12-10 05:00:00	0.2	1.4	34.8	2012-12-09 23:00:00	2012-12-10 13:45:00	2012-12-10 16:00:00	133.25	155	147.25	75791.9
455	2012-12-11 23:30:00	2012-12-12 05:47:47	2012-12-12 09:00:00	0.4	2.3	6.6	2012-12-11 23:45:00	2012-12-12 00:30:00	2012-12-12 12:00:00	142	144	139.75	51077.3
456	2013-04-04 10:30:00	2013-04-05 00:30:01	2013-04-05 19:00:00	0.599916	4.9	0	2013-04-04 12:00:00	2013-04-05 20:00:00	2013-04-06 12:00:00	223.25	356	246	8.17139e+06
457	2013-06-24 14:00:00	2013-06-24 15:37:26	2013-06-24 22:00:00	0.7	2.8	2.7	2013-06-24 15:00:00	2013-06-25 22:00:00	2013-06-28 18:00:00	182.5	243	227	2.26794e+07
458	2013-06-25 09:00:00	2013-06-25 16:30:02	2013-06-26 15:00:00	2.19987	19.1	3	2013-06-25 09:00:00	2013-06-26 08:00:00	2013-06-26 23:00:00	212.5	387	318	5.6192e+06
459	2013-06-29 11:04:00	2013-06-29 11:34:00	2013-06-29 13:00:00	1.42667	1.9	21.9	2013-06-29 11:19:00	2013-06-29 13:00:00	2013-06-29 19:00:00	227	233	210.25	81045
460	2013-11-03 08:00:00	2013-11-03 08:30:00	2013-11-03 11:00:00	0.1	0.4	6.1	2013-11-03 10:00:00	2013-11-03 18:15:00	2013-11-03 23:00:00	103.5	121	106	258785
461	2013-11-07 02:00:00	2013-11-07 19:29:56	2013-11-07 22:00:00	3.8984	16.6	2.7	2013-11-07 04:00:00	2013-11-08 00:45:00	2013-11-08 09:00:00	116	193	167.5	1.18823e+06
462	2013-11-16 05:30:00	2013-11-16 11:20:14	2013-11-16 13:00:00	0.2	1.4	0	2013-11-16 05:45:00	2013-11-16 06:15:00	2013-11-16 16:00:00	104	108	101.55	49653.1
463	2013-11-16 23:00:00	2013-11-16 23:30:00	2013-11-17 09:00:00	0.1	0.6	1.4	2013-11-17 03:00:00	2013-11-17 19:15:00	2013-11-18 02:00:00	95.725	112	79.775	949436
464	2014-03-01 07:00:00	2014-03-01 11:29:58	2014-03-01 17:00:00	0.59993	2.9	8.2	2014-03-01 08:00:00	2014-03-02 14:30:00	2014-03-02 18:00:00	88.475	95.7	90.375	63892.1
465	2014-03-02 01:00:00	2014-03-02 23:52:22	2014-03-04 02:00:00	1.1	21.1	9.8	2014-03-02 02:00:00	2014-03-03 20:30:00	2014-03-04 08:00:00	89.9	99.8	88.475	506651
466	2014-03-04 13:00:00	2014-03-04 16:10:19	2014-03-04 18:00:00	0.4	1.6	29.9	2014-03-04 13:00:00	2014-03-04 15:00:00	2014-03-05	92.825	99.8	93.3	87854.8
467	2014-03-05 11:00:00	2014-03-06 00:29:57	2014-03-07 05:00:00	1.69964	17.6	25.6	2014-03-05 12:00:00	2014-03-06 17:45:00	2014-03-07 08:00:00	90.875	165	135	2.06767e+06
468	2014-03-09 06:00:00	2014-03-09 22:30:00	2014-03-11 05:00:00	1.39984	24.7	20.4	2014-03-09 07:00:00	2014-03-10 15:00:00	2014-03-11 08:00:00	121	208	162.25	3.8159e+06
469	2014-04-15 12:00:00	2014-04-15 13:43:26	2014-04-15 17:00:00	0.3	1.2	0	2014-04-15 12:00:00	2014-04-15 19:15:00	2014-04-16 02:00:00	281.5	311	271	911756
470	2014-04-17 21:12:00	2014-04-17 22:29:59	2014-04-18 08:00:00	1.49993	4.2	1.3	2014-04-17 22:00:00	2014-04-18 18:45:00	2014-04-19 08:00:00	405.25	677	424.5	9.28215e+06
471	2014-04-27 09:00:00	2014-04-27 15:30:25	2014-04-27 19:00:00	0.3	1.9	35.7	2014-04-27 09:00:00	2014-04-27 17:00:00	2014-04-28 09:00:00	346	428	313	3.66089e+06
472	2014-05-21 16:00:00	2014-05-21 16:30:00	2014-05-21 18:00:00	0.5	0.7	1.7	2014-05-21 18:00:00	2014-05-22 08:00:00	2014-05-22 16:00:00	696.75	759	723.5	1.09348e+06
473	2014-06-18 01:00:00	2014-06-18 09:29:57	2014-06-18 13:00:00	0.49993	2.2	8.3	2014-06-18 01:00:00	2014-06-18 01:30:00	2014-06-18 14:00:00	473.75	475	448.75	117943
474	2014-06-27 08:20:00	2014-06-27 09:30:04	2014-06-27 16:00:00	1.39959	4.2	4	2014-06-27 11:00:00	2014-06-28 06:30:00	2014-06-28 11:00:00	472.5	520	501.25	390164
475	2014-08-04 14:10:00	2014-08-04 15:29:59	2014-08-04 17:00:00	2.69999	3.8	10.4	2014-08-04 15:00:00	2014-08-05 00:30:00	2014-08-05 19:00:00	149.75	168	153	870326
476	2014-08-06 05:20:00	2014-08-06 13:30:01	2014-08-06 22:00:00	0.599939	5.2	12.4	2014-08-06 06:00:00	2014-08-07 21:45:00	2014-08-08 16:00:00	151.75	236	169.5	3.97671e+06
477	2014-08-07 07:00:00	2014-08-07 16:29:58	2014-08-07 19:00:00	7.69735	15.6	11.2	2014-08-07 08:00:00	2014-08-08	2014-08-08 16:00:00	164.25	284	169.5	3.74716e+06
478	2014-08-12 05:08:34	2014-08-12 14:30:01	2014-08-12 22:00:00	0.999955	5.3	23.3	2014-08-12 07:00:00	2014-08-13 21:45:00	2014-08-15 18:00:00	136	222	155	1.01724e+07
479	2014-08-13 11:02:08	2014-08-13 15:30:00	2014-08-13 18:00:00	3.79968	12.5	7.8	2014-08-13 12:00:00	2014-08-13 23:00:00	2014-08-15 02:00:00	161.75	240	169.5	5.14369e+06
480	2014-08-19 12:12:00	2014-08-19 13:29:59	2014-08-19 14:00:00	1.19995	1.7	1.1	2014-08-19 13:00:00	2014-08-19 13:30:00	2014-08-19 19:00:00	127	129	120.5	33750
481	2014-08-20 13:12:00	2014-08-20 13:42:00	2014-08-20 18:00:00	0.44	1.4	1.7	2014-08-20 14:00:00	2014-08-20 18:30:00	2014-08-21 21:00:00	125.5	133	120.25	596695
482	2014-08-21 08:12:00	2014-08-21 09:29:59	2014-08-21 17:00:00	0.699986	2.6	3.1	2014-08-21 22:00:00	2014-08-22 17:00:00	2014-08-24 23:00:00	121.5	192	135	7.50544e+06
483	2014-08-22 07:20:00	2014-08-22 08:29:58	2014-08-22 18:00:00	1.4996	3.6	5.7	2014-08-22 08:00:00	2014-08-23 01:00:00	2014-08-24 10:00:00	121.25	225	143.25	6374322
484	2014-10-22 22:30:00	2014-10-23 17:30:00	2014-10-24 09:00:00	0.999948	10.8	13.3	2014-10-22 23:00:00	2014-10-24 14:15:00	2014-10-28 08:00:00	113.5	186	131.5	1.29863e+07
485	2014-11-01 08:30:00	2014-11-01 13:29:56	2014-11-02 08:00:00	3.09828	21	1.5	2014-11-01 11:00:00	2014-11-02 00:45:00	2014-11-02 09:00:00	122.5	174	157.75	1.33811e+06
486	2014-11-09 15:30:00	2014-11-09 19:25:00	2014-11-10 05:00:00	1.2	7.5	0	2014-11-09 16:00:00	2014-11-10 00:30:00	2014-11-10 16:00:00	112.25	133	123.25	790256
487	2014-11-24 21:00:00	2014-11-25 02:29:59	2014-11-25 22:00:00	0.599998	6.7	28.2	2014-11-24 22:00:00	2014-11-26 16:30:00	2014-11-26 23:00:00	106	131	124	590510
488	2014-11-28 09:00:00	2014-11-29 07:29:56	2014-11-29 23:00:00	3.9983	28.7	6.7	2014-11-28 10:00:00	2014-11-29 07:45:00	2014-11-30 10:00:00	136.5	149	78.15	3.83295e+06
489	2014-12-01 07:00:00	2014-12-01 12:34:30	2014-12-02 04:00:00	1.4	14.6	28.7	2014-12-01 08:00:00	2014-12-02 15:30:00	2014-12-02 23:00:00	81.65	138	113.5	2521800
490	2014-12-03 06:00:00	2014-12-04 05:30:03	2014-12-05 05:00:00	0.999452	11.9	43.3	2014-12-03 06:00:00	2014-12-04 16:15:00	2014-12-05 10:00:00	121.75	136	128.25	471853
491	2014-12-12 16:00:00	2014-12-12 22:30:01	2014-12-13 07:00:00	1.59991	10.9	0	2014-12-12 16:00:00	2014-12-13 01:00:00	2014-12-13 12:00:00	115	124	118	264949
492	2014-12-16 13:00:00	2014-12-16 13:30:00	2014-12-16 18:00:00	0.1	0.6	10.9	2014-12-16 13:00:00	2014-12-16 13:45:00	2014-12-16 23:00:00	111.75	119	109.5	75397.5
493	2014-12-19 05:30:00	2014-12-19 13:29:59	2014-12-19 21:00:00	0.399994	2.5	0.6	2014-12-19 06:00:00	2014-12-20 15:45:00	2014-12-20 18:00:00	102.5	112	104	117066
494	2014-12-20 06:00:00	2014-12-20 21:29:59	2014-12-22 05:00:00	2.29995	28.5	3.1	2014-12-20 07:00:00	2014-12-21 13:30:00	2014-12-22 06:00:00	96.7	119	112.25	824003
495	2015-02-01 08:00:00	2015-02-01 17:29:58	2015-02-02 01:00:00	0.699889	3.8	1.3	2015-02-01 08:00:00	2015-02-01 17:30:00	2015-02-02 03:00:00	82.95	126	94.775	890062
496	2015-02-02 12:00:00	2015-02-02 12:30:00	2015-02-04 14:00:00	2	25.3	5.1	2015-02-02 12:00:00	2015-02-02 14:15:00	2015-02-04 17:00:00	100.925	117	101.45	196761
497	2015-02-06 14:30:00	2015-02-07 08:29:59	2015-02-08 06:00:00	2.79999	44.5	29.1	2015-02-06 15:00:00	2015-02-08 14:45:00	2015-02-08 21:00:00	105	240	197	4290550
498	2015-02-08 18:15:00	2015-02-09 04:30:04	2015-02-10 05:00:00	2.69955	20.2	44.5	2015-02-08 22:00:00	2015-02-09 15:45:00	2015-02-10 07:00:00	197.25	258	211.75	2.61853e+06
499	2015-03-11 14:00:00	2015-03-11 14:30:00	2015-03-11 21:00:00	0.1	0.8	0	2015-03-11 14:00:00	2015-03-12 18:15:00	2015-03-13 09:00:00	103.5	192	123	3.36752e+06
500	2015-03-14 13:00:00	2015-03-14 13:30:00	2015-03-16 03:00:00	1.6	12.8	0.8	2015-03-14 13:00:00	2015-03-15 17:30:00	2015-03-16 12:00:00	139.75	331	258	7.22101e+06
501	2015-03-17 06:00:00	2015-03-17 11:29:59	2015-03-17 21:00:00	1	7.3	13.6	2015-03-17 10:00:00	2015-03-17 21:00:00	2015-03-18 11:00:00	245	323	247	2650248
502	2015-03-31 12:30:00	2015-03-31 18:29:57	2015-04-01 04:00:00	0.699725	5.4	4.3	2015-03-31 14:00:00	2015-04-01 02:00:00	2015-04-01 13:00:00	311	379	325	2.38983e+06
503	2015-05-11 17:04:36	2015-05-12 22:29:57	2015-05-13 04:00:00	4.6981	18.9	0.9	2015-05-11 18:00:00	2015-05-13 04:00:00	2015-05-13 14:00:00	369.5	461	437	1.29036e+06
504	2015-05-15 05:05:27	2015-05-15 13:29:59	2015-05-16 03:00:00	1.69993	13.2	18.9	2015-05-15 07:00:00	2015-05-16 03:30:00	2015-05-16 08:00:00	385.75	456	434.75	815980
505	2015-05-18 12:00:00	2015-05-18 17:32:48	2015-05-18 21:00:00	2.10354	3.3	13.2	2015-05-18 12:00:00	2015-05-19 20:45:00	2015-05-21	391.5	428	415.5	2438100
506	2015-05-19 13:00:00	2015-05-19 14:30:01	2015-05-19 18:00:00	0.999736	1.6	16.5	2015-05-19 14:00:00	2015-05-20 01:45:00	2015-05-20 02:00:00	411	446	433.75	60492.2
507	2015-05-21 10:00:00	2015-05-21 14:29:58	2015-05-22 02:00:00	3.19941	9.6	10.7	2015-05-21 10:00:00	2015-05-22 12:30:00	2015-05-22 17:00:00	416.5	480	461.75	981368
508	2015-06-01 05:10:00	2015-06-01 10:30:04	2015-06-02 06:00:00	4.09959	20.5	2.5	2015-06-01 06:00:00	2015-06-02 00:15:00	2015-06-02 22:00:00	389	505	466.5	5.97472e+06
509	2015-06-09 12:30:00	2015-06-09 13:29:57	2015-06-09 16:00:00	0.299933	0.7	2.4	2015-06-09 13:00:00	2015-06-10 03:15:00	2015-06-10 04:00:00	416.75	465	451	470644
510	2015-07-26 23:20:00	2015-07-27 16:29:53	2015-07-27 18:00:00	3.39694	14.7	8.4	2015-07-27 01:00:00	2015-07-28 04:45:00	2015-07-29 18:00:00	85.725	112	88.025	3.12945e+06
511	2015-08-05 05:30:00	2015-08-05 12:29:58	2015-08-05 19:00:00	1.09971	2.3	0	2015-08-05 07:00:00	2015-08-06 06:45:00	2015-08-06 21:00:00	78.575	93.8	81.225	849429
512	2015-08-08 03:00:00	2015-08-08 05:30:02	2015-08-08 14:00:00	2.1996	7.7	2.3	2015-08-08 04:00:00	2015-08-08 21:00:00	2015-08-10 21:00:00	78.15	104	80.35	2757690
513	2015-09-03 17:15:00	2015-09-04 02:30:02	2015-09-04 07:00:00	9	37.5	4	2015-09-03 23:00:00	2015-09-04 10:30:00	2015-09-05 14:00:00	70.6	104	78.15	1.4325e+06
514	2015-10-17 20:00:00	2015-10-17 20:30:00	2015-10-18 03:00:00	1	3.3	0	2015-10-17 20:00:00	2015-10-19 01:30:00	2015-10-22 08:00:00	75.175	97.7	80.775	4.42121e+06
515	2015-10-18 18:04:17	2015-10-18 20:30:00	2015-10-19	3.89952	10.1	3.3	2015-10-18 19:00:00	2015-10-19 04:15:00	2015-10-20 23:00:00	84.775	102	88.95	1.75018e+06
516	2015-10-19 09:20:00	2015-10-19 10:29:58	2015-10-20 05:00:00	1.1997	6.4	13.4	2015-10-19 12:00:00	2015-10-20 01:15:00	2015-10-20 08:00:00	96.7	106	98.75	122951
517	2015-10-28 23:00:00	2015-10-28 23:30:00	2015-10-29 09:00:00	0.1	1	0.5	2015-10-28 23:00:00	2015-10-29 19:00:00	2015-10-30 02:00:00	83.875	89.9	84.775	78750
518	2015-10-30 08:30:00	2015-10-30 12:29:55	2015-10-31 17:00:00	1.6988	8.3	1.5	2015-10-30 09:00:00	2015-11-01 14:15:00	2015-11-02 09:00:00	82.525	165	135.75	3.2525e+06
519	2016-02-17 14:00:00	2016-02-18 07:29:56	2016-02-19 07:00:00	1.699	17.7	12.1	2016-02-17 14:00:00	2016-02-18 09:00:00	2016-02-19 11:00:00	95.7	99.8	92.3	161982
520	2016-03-07 14:00:00	2016-03-07 14:30:00	2016-03-07 18:00:00	0.1	0.4	10.1	2016-03-07 14:00:00	2016-03-07 14:15:00	2016-03-08	118.5	119	104	4567.5
521	2016-03-08 22:30:00	2016-03-09 00:29:58	2016-03-09 03:00:00	0.499966	1.6	9.6	2016-03-08 22:45:00	2016-03-08 23:00:00	2016-03-09 10:00:00	104	110	99.825	52689
522	2016-03-09 13:00:00	2016-03-10 15:33:49	2016-03-11 14:00:00	2	19.4	11.2	2016-03-09 14:00:00	2016-03-11 20:45:00	2016-03-14 07:00:00	99.8	157	130.5	8.01766e+06
523	2016-04-04 10:00:00	2016-04-04 12:32:38	2016-04-04 16:00:00	0.3	1.3	0	2016-04-04 10:00:00	2016-04-04 18:45:00	2016-04-04 21:00:00	188.25	202	196	71892.6
524	2016-04-12 14:00:00	2016-04-13 03:30:03	2016-04-13 07:00:00	1.69971	6.9	0	2016-04-12 14:00:00	2016-04-13 19:45:00	2016-04-14 10:00:00	487.5	826	563.5	21720150
525	2016-05-19 02:20:00	2016-05-19 06:29:56	2016-05-19 13:00:00	2.29873	7.6	6.1	2016-05-19 02:35:00	2016-05-20	2016-05-20 07:00:00	759	759	709.75	141573
526	2016-10-13 13:00:00	2016-10-15 21:30:00	2016-10-16 09:00:00	2.99995	50.5	1.6	2016-10-13 13:00:00	2016-10-16 05:00:00	2016-10-19 07:00:00	90.375	371	154	4.04015e+07
527	2016-10-25 06:00:00	2016-10-25 10:29:58	2016-10-25 17:00:00	0.499965	2.6	8.2	2016-10-25 06:00:00	2016-10-25 19:15:00	2016-10-26 19:00:00	149.75	174	152	1.43595e+06
528	2016-10-27 14:30:00	2016-10-27 16:29:58	2016-10-28 06:00:00	1.49966	3.4	10.8	2016-10-27 18:00:00	2016-10-29 00:15:00	2016-10-29 22:00:00	141.75	160	144.5	1.38659e+06
529	2016-10-28 17:00:00	2016-10-28 21:29:58	2016-10-29 03:00:00	1.09983	3.5	14.2	2016-10-28 18:00:00	2016-10-29 10:45:00	2016-10-29 17:00:00	153.25	162	151.25	321055
530	2016-10-30 06:00:00	2016-10-30 20:29:58	2016-11-01 16:00:00	5.099	28.2	17.7	2016-10-30 06:00:00	2016-10-31 04:15:00	2016-11-02 09:00:00	144.5	327	183	16615665
531	2016-11-13 14:30:00	2016-11-13 15:29:57	2016-11-13 16:00:00	0.599732	0.8	0	2016-11-13 14:45:00	2016-11-13 14:45:00	2016-11-14	122	126	122.5	36577.7
532	2016-11-14 07:00:00	2016-11-15 09:37:49	2016-11-16 01:00:00	2.5	20.6	0.8	2016-11-14 09:00:00	2016-11-16 02:45:00	2016-11-16 19:00:00	122.25	300	209	6.40984e+06
533	2016-11-18 06:00:00	2016-11-19 01:57:43	2016-11-19 05:00:00	0.1	2.4	21.8	2016-11-18 09:00:00	2016-11-18 18:15:00	2016-11-19 10:00:00	89.425	154	136.5	1.91847e+06
534	2016-11-19 13:00:00	2016-11-20 02:50:35	2016-11-20 04:00:00	0.2	1.8	24.2	2016-11-19 13:00:00	2016-11-19 18:45:00	2016-11-20 06:00:00	138.75	152	139.5	363322
535	2016-12-06 04:00:00	2016-12-06 04:30:00	2016-12-06 16:00:00	0.6	1.3	18.5	2016-12-06 05:00:00	2016-12-07 15:45:00	2016-12-08 01:00:00	71.8	117	91.325	2.03058e+06
536	2017-02-16 03:00:00	2017-02-16 16:30:03	2017-02-17 02:00:00	1.19991	11	0	2017-02-16 04:00:00	2017-02-16 17:15:00	2017-02-17 09:00:00	158.5	189	169.5	983824
537	2017-03-11 19:00:00	2017-03-11 22:29:57	2017-03-12	0.399864	1.3	0	2017-03-11 19:15:00	2017-03-11 19:15:00	2017-03-12 01:00:00	165	171	165.75	38827.2
538	2017-03-15 19:20:00	2017-03-15 22:30:01	2017-03-16 17:00:00	2.39984	18	2.5	2017-03-15 20:00:00	2017-03-16 19:15:00	2017-03-17 11:00:00	212.75	284	263.75	2.66384e+06
539	2017-03-18 14:00:00	2017-03-19 05:30:05	2017-03-20 14:00:00	1.8995	21.6	20.4	2017-03-18 14:00:00	2017-03-20 21:00:00	2017-03-26 06:00:00	286.25	445	393.25	6.47509e+07
540	2017-04-02 01:00:00	2017-04-02 01:30:00	2017-04-02 05:00:00	0.1	0.3	27.8	2017-04-02 02:00:00	2017-04-02 21:00:00	2017-04-03	371.5	417	387	467683
541	2017-04-06 05:30:00	2017-04-06 15:30:02	2017-04-06 18:00:00	0.299937	1.6	0.3	2017-04-06 09:00:00	2017-04-07 17:45:00	2017-04-08 06:00:00	391	595	520	8346540
542	2017-04-28 11:00:00	2017-04-28 11:30:00	2017-04-28 16:00:00	0.1	0.6	17.8	2017-04-28 11:00:00	2017-04-28 22:15:00	2017-04-29 09:00:00	495.75	588	468.25	3793275
543	2017-05-01 16:00:00	2017-05-01 17:19:53	2017-05-01 19:00:00	0.3	0.8	7.7	2017-05-01 16:00:00	2017-05-02 18:30:00	2017-05-03 04:00:00	644	822	777.25	6830800
544	2017-05-06 11:20:00	2017-05-07 04:29:59	2017-05-07 05:00:00	0.505225	4.4	6.5	2017-05-06 15:00:00	2017-05-07 01:00:00	2017-05-07 06:00:00	1305	1700	1597.5	3.25609e+06
545	2017-06-04 13:00:00	2017-06-04 19:29:55	2017-06-04 20:00:00	0.399728	0.8	0	2017-06-04 13:00:00	2017-06-05 14:30:00	2017-06-05 17:00:00	1495	1790	1660	1.98707e+06
546	2017-06-09 15:30:00	2017-06-09 16:29:57	2017-06-09 22:00:00	0.599732	1.5	0.8	2017-06-09 15:45:00	2017-06-09 15:45:00	2017-06-10	1400	1420	1315	465068
547	2017-06-11 18:30:00	2017-06-11 19:29:57	2017-06-11 21:00:00	0.399866	0.8	4.4	2017-06-11 18:45:00	2017-06-11 19:00:00	2017-06-11 22:00:00	1110	1090	1045	11250
548	2017-06-12 07:00:00	2017-06-12 11:29:58	2017-06-13 11:00:00	4.09878	24.2	5.2	2017-06-12 10:00:00	2017-06-13 08:00:00	2017-06-13 18:00:00	1003	1260	1097.5	7.37866e+06
549	2017-06-16 02:00:00	2017-06-16 02:30:00	2017-06-16 04:00:00	0.1	0.3	27.9	2017-06-16 04:00:00	2017-06-17 03:15:00	2017-06-24 19:00:00	859	998	949.75	1.26858e+08
550	2017-06-16 14:00:00	2017-06-16 15:30:01	2017-06-16 21:00:00	1.8995	4.1	25.3	2017-06-16 14:00:00	2017-06-17 08:30:00	2017-06-17 18:00:00	900	1020	979.25	2.88781e+06
551	2017-06-26 17:20:00	2017-06-26 18:29:58	2017-06-26 22:00:00	0.499933	1.1	0	2017-06-26 18:00:00	2017-06-27 12:45:00	2017-06-27 18:00:00	943	1070	1030	1.465e+06
552	2017-10-20 05:30:00	2017-10-20 07:30:04	2017-10-20 20:00:00	6.29839	15	0	2017-10-20 08:00:00	2017-10-21 00:15:00	2017-10-21 14:00:00	138.5	159	143	830464
553	2017-10-21 11:00:00	2017-10-22 01:30:04	2017-10-22 21:00:00	0.999742	13.4	15	2017-10-21 15:00:00	2017-10-22 23:00:00	2017-10-24 10:00:00	147.25	272	177.5	9.84755e+06
554	2017-11-01 12:30:00	2017-11-01 17:25:07	2017-11-01 20:00:00	0.4	1.9	0	2017-11-01 13:00:00	2017-11-02 19:30:00	2017-11-05 07:00:00	141.5	159	145.75	1.06982e+07
555	2017-11-02 05:00:00	2017-11-03 10:30:04	2017-11-04 07:00:00	7.29385	36.2	1.9	2017-11-02 06:00:00	2017-11-03 20:00:00	2017-11-04 12:00:00	142	243	190.25	3.76556e+06
556	2017-11-21 10:30:00	2017-11-21 14:29:55	2017-11-22 20:00:00	1.09961	14.3	40	2017-11-21 13:00:00	2017-11-22 17:45:00	2017-11-23 05:00:00	212.25	391	335	4.85076e+06
557	2017-11-23 08:30:00	2017-11-23 21:29:59	2017-11-24 07:00:00	0.99999	10.9	25.9	2017-11-23 13:00:00	2017-11-24 08:45:00	2017-11-25 11:00:00	319	605	310	2.21873e+07
558	2017-11-26 08:04:00	2017-11-26 18:29:59	2017-11-27 10:00:00	2.19971	15.7	25.4	2017-11-26 09:00:00	2017-11-27 08:15:00	2017-11-28 10:00:00	286	533	261.25	2.00786e+07
559	2017-11-28 22:00:00	2017-11-28 23:30:01	2017-11-29 03:00:00	0.499967	1.8	26.8	2017-11-28 22:15:00	2017-11-28 23:00:00	2017-11-29 11:00:00	310	314	254.75	292200
560	2017-11-30 20:00:00	2017-11-30 20:30:00	2017-11-30 22:00:00	0.1	0.3	17.7	2017-11-30 20:00:00	2017-12-01 18:15:00	2017-12-01 22:00:00	238.25	268	251.25	298350
561	2017-12-22 05:20:00	2017-12-22 23:08:22	2017-12-23 14:00:00	0.3	8	7.8	2017-12-22 06:00:00	2017-12-23 11:00:00	2017-12-24 11:00:00	125.375	146	104.188	3.16157e+06
562	2017-12-24 16:00:00	2017-12-24 21:30:11	2017-12-25 19:00:00	0.6	6.9	15.8	2017-12-24 16:00:00	2017-12-25 23:00:00	2017-12-26 16:00:00	106.688	148	137.104	2.22112e+06
563	2017-12-28 21:00:00	2017-12-29 02:29:53	2017-12-29 08:00:00	1.09958	5.9	7.3	2017-12-29 06:00:00	2017-12-29 20:15:00	2017-12-29 23:00:00	145.229	162	152	144726
564	2017-12-29 23:00:00	2017-12-30 03:29:58	2017-12-30 05:00:00	0.299965	1.4	13.2	2017-12-30	2017-12-30 00:15:00	2017-12-30 08:00:00	156	159	142.75	50709.4
565	2018-01-05 23:20:00	2018-01-06 03:30:02	2018-01-06 20:00:00	3.19804	8.9	0	2018-01-06	2018-01-06 13:30:00	2018-01-06 21:00:00	137	145	132.25	351439
566	2018-01-18 15:00:00	2018-01-19 04:29:57	2018-01-19 18:00:00	0.799927	11.4	0	2018-01-18 19:00:00	2018-01-19 02:15:00	2018-01-20 03:00:00	126.5	137	115.25	873483
567	2018-01-30 05:30:00	2018-01-30 08:25:29	2018-01-30 16:00:00	0.4	2.4	21.9	2018-01-30 07:00:00	2018-01-31 13:30:00	2018-01-31 17:00:00	118	123	117.25	92231.8
568	2018-02-02 17:00:00	2018-02-03 01:29:57	2018-02-03 04:00:00	0.49993	2.8	7.1	2018-02-02 17:00:00	2018-02-03 17:00:00	2018-02-03 19:00:00	115.75	130	126	284123
569	2018-02-04 06:00:00	2018-02-05 01:29:58	2018-02-05 05:00:00	0.399918	2.9	9.9	2018-02-04 11:00:00	2018-02-05 16:30:00	2018-02-06 03:00:00	125	164	135.167	2.23393e+06
570	2018-04-01 20:00:00	2018-04-01 23:29:57	2018-04-03 01:00:00	0.599864	3.9	0	2018-04-01 20:00:00	2018-04-01 20:45:00	2018-04-03 09:00:00	160.25	164	79.4	2.28816e+06
571	2018-04-03 12:12:00	2018-04-03 13:42:13	2018-04-03 15:00:00	0.5	1.5	3.9	2018-04-03 13:00:00	2018-04-03 19:00:00	2018-04-04	107.125	162	129.25	916146
572	2018-04-05 10:00:00	2018-04-06 09:29:57	2018-04-06 14:00:00	0.799411	6.1	5.4	2018-04-05 11:00:00	2018-04-06 18:30:00	2018-04-07 09:00:00	136.5	335	239.75	5.80349e+06
573	2018-04-07 05:07:30	2018-04-07 14:29:57	2018-04-09 01:00:00	2.79878	19	11.5	2018-04-07 10:00:00	2018-04-07 18:45:00	2018-04-09 12:00:00	240.5	373	206.75	1.04631e+07
574	2018-05-20 12:00:00	2018-05-20 15:30:09	2018-05-21 02:00:00	0.7	4.5	6.5	2018-05-20 12:00:00	2018-05-21 09:30:00	2018-05-21 13:00:00	789.5	835	811.5	295092
575	2018-05-26 05:30:00	2018-05-26 19:30:01	2018-05-27 02:00:00	1.99945	7.8	7.9	2018-05-26 07:00:00	2018-05-28 02:00:00	2018-05-28 05:00:00	935.75	970	941.25	508221
576	2018-06-07 13:00:00	2018-06-07 18:29:59	2018-06-07 19:00:00	2.79995	5.3	1.5	2018-06-07 15:00:00	2018-06-08 01:30:00	2018-06-08 11:00:00	642.5	744	716.75	1.62136e+06
577	2018-06-09 16:00:00	2018-06-09 19:30:03	2018-06-10 07:00:00	1.3997	9.8	6.8	2018-06-09 19:00:00	2018-06-10 08:30:00	2018-06-10 19:00:00	623.5	731	672	3.06645e+06
578	2018-06-16 06:00:00	2018-06-16 07:30:01	2018-06-16 11:00:00	0.799901	2.3	0.3	2018-06-16 08:00:00	2018-06-17 10:45:00	2018-06-17 13:00:00	419.5	442	434.75	59462.1
579	2018-06-16 22:08:34	2018-06-17 05:29:59	2018-06-18 05:00:00	8.59841	31.5	2.5	2018-06-17	2018-06-18 04:15:00	2018-06-18 18:00:00	403.5	544	485.75	4.2978e+06
580	2018-08-26 17:00:00	2018-08-27 13:29:59	2018-08-27 17:00:00	0.799976	5	0.8	2018-08-26 17:00:00	2018-08-27 20:00:00	2018-08-30 22:00:00	81.775	106	86.2	3.70103e+06
581	2018-10-02 20:30:00	2018-10-02 23:29:59	2018-10-03 05:00:00	0.499998	1.5	1.1	2018-10-02 22:00:00	2018-10-03 05:00:00	2018-10-03 22:00:00	85.2	91.3	85.7	240011
582	2018-10-04 00:03:09	2018-10-04 13:29:54	2018-10-05 05:00:00	2.3991	14.9	2.6	2018-10-04 02:00:00	2018-10-04 20:15:00	2018-10-07 20:00:00	85.2	132	94.875	5.51251e+06
583	2018-10-06 13:30:00	2018-10-06 16:29:59	2018-10-06 17:00:00	0.399998	1	17.5	2018-10-06 13:45:00	2018-10-06 13:45:00	2018-10-06 20:00:00	102	102	97.5	20052
584	2018-10-08 21:00:00	2018-10-09 11:30:04	2018-10-10 04:00:00	1.8996	15.7	16.9	2018-10-08 22:00:00	2018-10-09 19:00:00	2018-10-11 21:00:00	92.8	145	104.5	4.51469e+06
585	2018-10-31 09:00:00	2018-10-31 11:00:04	2018-11-01 02:00:00	0.2	1.1	22	2018-10-31 09:00:00	2018-11-02 01:00:00	2018-11-02 03:00:00	93.825	102	98.6	95881.9
586	2018-11-02 10:00:00	2018-11-02 11:30:01	2018-11-02 17:00:00	0.9999	4	22	2018-11-02 10:00:00	2018-11-02 20:30:00	2018-11-03 12:00:00	99.7	113	109	467206
587	2018-11-22 06:00:00	2018-11-23 22:30:05	2018-11-24 14:00:00	3.1994	16.7	0	2018-11-22 06:00:00	2018-11-22 11:30:00	2018-11-24 18:00:00	79.875	87.2	81.775	599911
588	2018-11-26 12:30:00	2018-11-26 13:00:00	2018-11-26 15:00:00	0.2	0.6	16.7	2018-11-26 13:00:00	2018-11-26 17:30:00	2018-11-27 01:00:00	77.5	102	81.3	501911
589	2018-11-27 09:00:00	2018-11-28 03:29:57	2018-11-28 11:00:00	1.09993	8.2	17.3	2018-11-27 10:00:00	2018-11-27 14:15:00	2018-11-28 18:00:00	83.2	95.4	88.7	423904
590	2018-12-16 19:10:00	2018-12-16 23:33:39	2018-12-19 09:00:00	1.50528	16.9	12.5	2018-12-17 06:00:00	2018-12-18 15:00:00	2018-12-19 10:00:00	88.2125	99.7	93.2625	115071
591	2019-04-05 05:20:00	2019-04-09 00:36:52	2019-04-10 04:00:00	2.4	41.6	1.7	2019-04-05 09:00:00	2019-04-09 16:00:00	2019-04-10 14:00:00	129	468	345.75	1.38366e+07
592	2019-04-15 20:00:00	2019-04-15 23:29:57	2019-04-16 05:00:00	1.69939	4.7	7.9	2019-04-15 21:00:00	2019-04-16 21:30:00	2019-04-17 09:00:00	217.75	238	213	651791
593	2019-05-16 17:12:00	2019-05-17 03:30:04	2019-05-17 05:00:00	0.999874	7.1	0	2019-05-16 18:00:00	2019-05-17 09:30:00	2019-05-17 14:00:00	868.5	945	910	657630
594	2019-05-19 09:00:00	2019-05-20 13:29:57	2019-05-21 14:00:00	2.89888	24.5	9.3	2019-05-19 11:00:00	2019-05-21 22:15:00	2019-05-22	758.75	789	762	339726
595	2019-05-29 16:30:00	2019-05-29 17:30:03	2019-05-29 19:00:00	0.3999	0.9	10.2	2019-05-29 19:00:00	2019-05-30 10:30:00	2019-05-30 18:00:00	644.75	710	691	1.44496e+06
596	2019-05-31 14:00:00	2019-05-31 14:30:00	2019-05-31 16:00:00	0.1	0.3	0.9	2019-05-31 14:00:00	2019-06-01 11:30:00	2019-06-01 18:00:00	760.5	789	770.25	265385
597	2019-06-01 18:00:00	2019-06-01 18:30:00	2019-06-02 01:00:00	0.1	0.3	1.2	2019-06-01 19:00:00	2019-06-02 11:45:00	2019-06-02 14:00:00	775.25	823	805.75	241834
598	2019-08-10 13:00:00	2019-08-10 18:29:59	2019-08-11 02:00:00	1.19998	2.4	6.4	2019-08-10 16:00:00	2019-08-11 09:30:00	2019-08-11 22:00:00	128	140	125.5	555281
599	2019-09-08 05:06:39	2019-09-08 11:31:15	2019-09-09 01:00:00	1	6.2	18.4	2019-09-08 06:00:00	2019-09-08 23:45:00	2019-09-14 06:00:00	94.15	124	101.5	8.74376e+06
600	2019-09-09 09:00:00	2019-09-09 09:30:00	2019-09-09 14:00:00	0.1	0.6	24.6	2019-09-09 12:00:00	2019-09-09 17:45:00	2019-09-10 04:00:00	117	124	115.5	185400
601	2019-10-17 06:00:00	2019-10-17 13:56:05	2019-10-17 15:00:00	0.1	0.7	0	2019-10-17 08:00:00	2019-10-17 19:45:00	2019-10-19 07:00:00	93.6	105	94.15	918223
602	2019-10-19 08:00:00	2019-10-19 09:29:55	2019-10-20 05:00:00	1.49909	16.4	0.7	2019-10-19 08:00:00	2019-10-20 22:45:00	2019-10-21 10:00:00	95.8	110	99	363672
603	2019-11-19 06:30:00	2019-11-19 09:29:59	2019-11-19 13:00:00	1.1	2.9	0	2019-11-19 07:00:00	2019-11-19 15:30:00	2019-11-19 21:00:00	90.35	105	98.5	187476
604	2019-12-11 06:20:00	2019-12-12 20:30:00	2019-12-13 06:00:00	1.69983	21.1	19.8	2019-12-11 07:00:00	2019-12-12 15:00:00	2019-12-13 09:00:00	70.7625	103	87.725	1.98138e+06
605	2020-01-28 05:08:34	2020-01-28 17:29:59	2020-01-29 05:00:00	1.99989	14.1	17.2	2020-01-28 06:00:00	2020-01-28 07:15:00	2020-01-29 11:00:00	87.2	89.3	74.525	268642
606	2020-01-29 21:00:00	2020-01-29 23:29:56	2020-01-30 05:00:00	2.19859	4.8	31.3	2020-01-29 22:00:00	2020-01-30 14:45:00	2020-01-30 19:00:00	82	91.4	82.5	93925.7
607	2020-02-02 05:04:36	2020-02-02 05:34:36	2020-02-03 05:00:00	1.36917	8.4	18.9	2020-02-02 06:00:00	2020-02-02 10:00:00	2020-02-03 11:00:00	78.5	83	68.1354	583714
608	2020-02-04 12:30:00	2020-02-04 13:00:00	2020-02-04 15:00:00	0.2	0.6	13.2	2020-02-04 14:00:00	2020-02-05 15:00:00	2020-02-09 11:00:00	59.2458	79.8292	59.475	7.93839e+06
609	2020-02-04 23:05:27	2020-02-04 23:35:27	2020-02-07 10:00:00	1.00151	11	9	2020-02-05	2020-02-07 16:45:00	2020-02-08 03:00:00	63.275	89.3	81.5	2.35766e+06
610	2020-02-07 20:00:00	2020-02-08 06:30:05	2020-02-09 02:00:00	0.999671	5	20	2020-02-07 21:00:00	2020-02-09 16:45:00	2020-02-10	85.1	93.6	80.5	278382
611	2020-04-25 14:03:31	2020-04-25 14:33:31	2020-04-26 05:00:00	1.60586	5.1	6.2	2020-04-25 15:00:00	2020-04-26 20:15:00	2020-04-27 10:00:00	366.5	706	440.5	1.57763e+07
612	2020-04-27 06:10:00	2020-04-27 07:29:59	2020-04-27 18:00:00	1.2	4.1	11.3	2020-04-27 11:00:00	2020-04-27 22:00:00	2020-04-28 10:00:00	443	584	422.75	5.76191e+06
613	2020-04-30 12:00:45	2020-04-30 12:30:45	2020-04-30 16:00:00	7.90121	18.3	10	2020-04-30 13:00:00	2020-05-01 00:15:00	2020-05-01 11:00:00	516	694	589	5.25731e+06
614	2020-05-02 15:20:00	2020-05-03 05:30:02	2020-05-03 14:00:00	0.711081	2.5	23.2	2020-05-02 16:00:00	2020-05-03 03:45:00	2020-05-03 16:00:00	536.25	578	542.5	1.20116e+06
615	2020-05-17 05:30:00	2020-05-17 06:00:00	2020-05-17 12:00:00	0.108333	0.3	11.8	2020-05-17 07:00:00	2020-05-18 07:30:00	2020-05-18 15:00:00	428.5	458	449.25	209011
616	2020-05-17 23:00:00	2020-05-19 16:30:00	2020-05-21 08:00:00	3.39947	32.4	12.1	2020-05-18 01:00:00	2020-05-19 22:45:00	2020-05-21 09:00:00	427.75	646	552	2.23378e+07
617	2020-05-30 17:15:00	2020-05-30 18:29:59	2020-05-31 01:00:00	0.699949	1.8	0	2020-05-30 20:00:00	2020-05-31 22:45:00	2020-06-01 13:00:00	720	801	778.5	3.28208e+06
618	2020-06-05 21:00:00	2020-06-06 12:29:59	2020-06-08 17:00:00	4.09989	28.1	0.1	2020-06-05 21:00:00	2020-06-07 04:15:00	2020-06-09 12:00:00	598.75	750	508	2.76526e+07
619	2020-06-13 08:30:00	2020-06-13 12:30:01	2020-06-15 01:00:00	1.39971	8	0.4	2020-06-13 10:00:00	2020-06-14 17:45:00	2020-06-15 04:00:00	405	433	416.5	815729
620	2020-06-15 10:00:00	2020-06-16 16:29:59	2020-06-18 01:00:00	2.89993	42.4	8.4	2020-06-15 10:00:00	2020-06-17 16:00:00	2020-06-18 02:00:00	412	584	526.5	3.0761e+06
621	2020-06-28 18:00:00	2020-06-28 23:29:53	2020-06-30 15:00:00	4.89486	32.4	0.4	2020-06-28 22:00:00	2020-06-29 22:15:00	2020-07-01 01:00:00	355.75	438	357.75	7.42478e+06
622	2020-07-23 13:05:00	2020-07-23 14:30:00	2020-07-23 20:00:00	7.0997	15	4.4	2020-07-23 14:00:00	2020-07-23 22:15:00	2020-07-26	160.75	298	177.25	1.24096e+07
623	2020-07-28 13:30:00	2020-07-28 15:30:04	2020-07-28 18:00:00	1.89974	5.6	15	2020-07-28 17:00:00	2020-07-29 11:30:00	2020-07-29 23:00:00	157	181	157	1541700
624	2020-09-18 16:12:00	2020-09-18 18:30:00	2020-09-19 17:00:00	1.4999	7.2	0	2020-09-18 20:00:00	2020-09-19 09:30:00	2020-09-21 01:00:00	100	119	102.75	1.47921e+06
