# Supplementary material for: Leveraging a time-series event separation method to disentangle time-varying hydrologic controls on streamflow – application to wildfire-affected catchments
Source: Copernicus journal article supplement (doi:10.5194/hess-29-27-2025), 2025-01-03
Supplement: Supplementary file 10 [file WetBottomCreek_EventAttributes.xlsx]

## Sheet: Events_Sorting - Copy
	storm_start	storm_peak	storm_end	storm_peak_60int_mm/hr	storm_depth_mm	antPrecip_mm	flow_start	flow_peak	flow_end	flow_start_mag_cfs	flow_peak_mag_cfs	flow_end_mag_cfs	volume_ft3
1	1986-10-03 02:00:00	1986-10-03 03:29:55	1986-10-03 04:00:00	0.299866	0.6	0.3	1986-10-03 02:15:00	1986-10-03 04:15:00	1986-10-03 16:00:00	0.84	0.94	0.84	3960
2	1986-10-05 04:01:30	1986-10-05 04:31:30	1986-10-06 05:00:00	3.90125	8.2	0.9	1986-10-05 04:16:30	1986-10-05 09:30:00	1986-10-06 07:00:00	0.67	0.75	0.67	2304
3	1986-10-08 04:20:00	1986-10-09 22:29:53	1986-10-10 18:00:00	3.79653	43.5	9.7	1986-10-09 15:00:00	1986-10-11 16:30:00	1986-10-14 14:00:00	1.25	33	8.7	1.50432e+07
4	1986-10-11 03:00:00	1986-10-11 15:29:56	1986-10-11 20:00:00	1.6999	8.8	52.3	1986-10-11 03:00:00	1986-10-11 21:45:00	1986-10-13 22:00:00	1.925	422	11	1.47315e+07
5	1986-12-07 07:20:00	1986-12-07 09:30:05	1986-12-07 19:00:00	3.6993	10.8	46.4	1986-12-07 08:00:00	1986-12-07 20:15:00	1986-12-08 06:00:00	1.925	60	29	860451
6	1986-12-15 06:00:00	1986-12-16 01:57:43	1986-12-16 05:00:00	0.1	2.4	1.2	1986-12-15 06:15:00	1986-12-15 06:15:00	1986-12-16 06:00:00	3.7	3.7	3.6	937.895
7	1986-12-17 00:05:00	1986-12-17 01:30:00	1986-12-17 17:00:00	1.39998	7.1	4	1986-12-17 15:00:00	1986-12-18 16:15:00	1986-12-19 04:00:00	3.5	3.7	3.6	10395.6
8	1986-12-20 03:04:36	1986-12-20 04:29:54	1986-12-20 19:00:00	3.9958	12.7	11.1	1986-12-20 18:00:00	1986-12-21 08:15:00	1986-12-22 14:00:00	3.85	10	8.4	298668
9	1987-01-03 06:00:00	1987-01-04 01:57:43	1987-01-04 05:00:00	0.1	2.4	0	1987-01-03 06:15:00	1987-01-03 06:15:00	1987-01-04 06:00:00	2.3	2.3	2.2	702
10	1987-01-04 21:15:00	1987-01-04 23:30:00	1987-01-05 19:00:00	3.49984	17.9	2.4	1987-01-05 06:00:00	1987-01-06 02:00:00	1987-01-06 23:00:00	2	161	45	4.56915e+06
11	1987-01-29 05:15:00	1987-01-30 02:37:30	1987-01-30 05:00:00	0.4	9.6	0	1987-01-29 08:00:00	1987-01-29 12:45:00	1987-01-30 09:00:00	8.55	9.7	8.4	62133.3
12	1987-01-30 17:04:36	1987-01-31 02:29:58	1987-01-31 18:00:00	3.99861	27.6	9.6	1987-01-31 02:00:00	1987-01-31 15:15:00	1987-02-03 07:00:00	8.7	176	22	1.3659e+07
13	1988-11-24 16:00:00	1988-11-24 22:30:01	1988-11-26 02:00:00	1.99994	21.8	0	1988-11-27	1988-11-27 02:00:00	1988-11-30 23:00:00	1.04	6.6	5.2	1.63866e+06
14	1989-01-03 22:07:30	1989-01-04 04:29:54	1989-01-05 13:00:00	13.1841	59.6	0	1989-01-04 05:00:00	1989-01-04 23:00:00	1989-01-06 15:00:00	1.1	829	152.5	5.47634e+07
15	1989-01-26 05:12:00	1989-01-26 21:29:59	1989-01-28 05:00:00	1.49995	23.9	10.5	1989-01-26 06:00:00	1989-01-28 21:30:00	1989-01-29 19:00:00	3.65	263	124	2.27059e+07
16	1989-02-04 19:00:00	1989-02-05 05:30:05	1989-02-05 22:00:00	1.3995	14.1	0	1989-02-05 07:00:00	1989-02-05 13:00:00	1989-02-08	43.5	851	69	3.83287e+07
17	1989-03-25 22:00:00	1989-03-26 01:30:03	1989-03-26 18:00:00	10.9977	59.5	0	1989-03-26 01:00:00	1989-03-26 15:45:00	1989-03-26 22:00:00	0.915	618	375	6.30822e+06
18	1990-01-17 16:00:00	1990-01-17 22:30:01	1990-01-18 16:00:00	1.99994	20.3	6.7	1990-01-17 22:00:00	1990-01-18 01:30:00	1990-01-18 17:00:00	1.3	1.7	1.4	17058.6
19	1990-01-31 14:00:00	1990-02-01 20:29:53	1990-02-02 05:00:00	1.69911	16.1	0	1990-02-01 18:00:00	1990-02-03 04:15:00	1990-02-11 21:00:00	1.5	2.4	2.1	1847630
20	1990-02-18 22:00:00	1990-02-19 03:30:05	1990-02-19 17:00:00	4.79801	24.3	4.3	1990-02-19 04:00:00	1990-02-20 12:00:00	1990-02-27 07:00:00	1.925	15	11	9.96372e+06
21	1990-03-12 22:30:00	1990-03-13 03:29:56	1990-03-13 06:00:00	1.09965	4.7	27.7	1990-03-12 23:00:00	1990-03-13 00:15:00	1990-03-13 22:00:00	96	100	49	138659
22	1990-03-28 23:30:00	1990-03-29 04:29:56	1990-03-29 18:00:00	5.2997	28.7	0	1990-03-29 09:00:00	1990-03-30 04:15:00	1990-03-30 16:00:00	1.75	51	35.25	835556
23	1990-03-30 15:00:00	1990-03-30 15:30:00	1990-03-30 19:00:00	0.1	0.5	29	1990-03-30 17:00:00	1990-03-30 22:15:00	1990-03-31 17:00:00	35.75	157	61	3.24467e+06
24	1990-07-10 14:07:30	1990-07-10 16:30:01	1990-07-10 19:00:00	2.49967	7.2	24.1	1990-07-10 18:00:00	1990-07-10 18:30:00	1990-07-11 04:00:00	8.5	21	0.29	16223.6
25	1990-07-11 13:20:00	1990-07-11 14:50:13	1990-07-11 16:00:00	0.5	1.3	31.3	1990-07-11 13:35:00	1990-07-12 15:45:00	1990-07-14 04:00:00	0.05	0.11	0.05	16344
26	1990-07-12 13:30:00	1990-07-12 14:30:15	1990-07-12 16:00:00	0.3	0.8	19.7	1990-07-12 13:45:00	1990-07-12 22:00:00	1990-07-13 22:00:00	0	0.31	0.07	17446.9
27	1990-08-15 11:00:00	1990-08-15 13:40:09	1990-08-15 17:00:00	0.4	2.1	43.5	1990-08-15 19:00:00	1990-08-15 20:30:00	1990-08-16 22:00:00	8.615	41	14	1.40713e+06
28	1991-01-03 16:30:00	1991-01-04 04:30:04	1991-01-04 17:00:00	8.99111	24.5	0	1991-01-04 16:00:00	1991-01-04 20:00:00	1991-01-05 20:00:00	298.75	560	113.5	8.37948e+06
29	1991-02-27 21:02:43	1991-02-28 04:29:56	1991-03-02 05:00:00	22.5886	185.4	0	1991-02-28 02:00:00	1991-03-01 10:30:00	1991-03-02 11:00:00	0.825	3550	304.75	2.54442e+08
30	1991-03-14 03:00:00	1991-03-14 04:29:55	1991-03-14 06:00:00	0.599866	1.3	0	1991-03-14 03:15:00	1991-03-14 03:15:00	1991-03-14 13:00:00	5.4	5.4	5.1	4610.77
31	1991-03-18 06:00:00	1991-03-19 10:29:57	1991-03-19 18:00:00	3.49945	14.9	23	1991-03-18 06:00:00	1991-03-19 23:00:00	1991-03-20 18:00:00	20.25	134	60.25	3307575
32	1991-12-09 18:30:00	1991-12-09 19:00:00	1991-12-09 20:00:00	0.15	0.3	0	1991-12-09 18:45:00	1991-12-09 18:45:00	1991-12-09 23:00:00	3.6	3.6	3.4	1111.76
33	1991-12-10 05:00:00	1991-12-11 03:30:02	1991-12-12 05:00:00	2.29982	26.5	0.3	1991-12-10 22:00:00	1991-12-12 11:45:00	1991-12-13 19:00:00	3.375	122	27	6.7172e+06
34	1991-12-17 11:20:00	1991-12-17 11:50:00	1991-12-17 13:00:00	0.3	0.6	0	1991-12-17 11:35:00	1991-12-17 11:45:00	1991-12-17 14:00:00	23	23	22	600
35	1991-12-28 21:30:00	1991-12-28 23:29:58	1991-12-29 02:00:00	0.399932	1.2	0	1991-12-28 21:45:00	1991-12-28 21:45:00	1991-12-29 09:00:00	10	10	9.7	5166
36	1991-12-29 20:00:00	1991-12-30 01:30:05	1991-12-30 20:00:00	1.39917	11.9	1.2	1991-12-30 10:00:00	1991-12-31 01:00:00	1991-12-31 21:00:00	9.1	87	47	2.85587e+06
37	1992-01-03 14:00:00	1992-01-03 21:30:02	1992-01-04 07:00:00	1.89968	12	15.7	1992-01-04	1992-01-04 14:15:00	1992-01-05 11:00:00	18.25	72	47	1.92257e+06
38	1992-01-05 04:00:00	1992-01-06 07:29:56	1992-01-06 19:00:00	3.19966	39.4	14.6	1992-01-06 03:00:00	1992-01-06 10:30:00	1992-01-07 20:00:00	38.75	563	151.5	2.64527e+07
39	1992-01-11 05:15:00	1992-01-11 05:45:00	1992-01-11 10:00:00	0.325	0.8	0	1992-01-12	1992-01-12 09:30:00	1992-01-13 16:00:00	42	73	60	2.39704e+06
40	1992-01-11 18:00:00	1992-01-12 03:29:58	1992-01-12 14:00:00	6.29969	21.4	0.8	1992-01-12	1992-01-12 23:15:00	1992-01-13 16:00:00	42	82	60	2.39704e+06
41	1992-02-12 02:00:00	1992-02-12 02:30:00	1992-02-12 06:00:00	0.1	0.5	49.9	1992-02-12 02:15:00	1992-02-12 02:15:00	1992-02-13 04:00:00	131	129	73	0
42	1992-02-13 01:00:00	1992-02-13 04:29:57	1992-02-13 21:00:00	3.09901	19.9	32.6	1992-02-13 06:00:00	1992-02-13 19:15:00	1992-02-16	74.5	409	65	2.07189e+07
43	1992-03-01 22:20:00	1992-03-02 18:34:27	1992-03-05 04:00:00	5.5	43	0	1992-03-02 15:00:00	1992-03-03 21:45:00	1992-03-06 22:00:00	5.15	224	47	2.52483e+07
44	1992-03-07 14:00:00	1992-03-09 03:30:01	1992-03-09 23:00:00	5.79991	78.9	43	1992-03-07 17:00:00	1992-03-09 05:45:00	1992-03-10 06:00:00	36.75	785	314.5	3.86437e+07
45	1992-03-21 03:00:00	1992-03-21 13:29:59	1992-03-21 19:00:00	2.9	27.2	0	1992-03-21 10:00:00	1992-03-22 05:45:00	1992-03-25 15:00:00	14.5	542	37	2.85971e+07
46	1992-03-25 06:00:00	1992-03-26 01:02:49	1992-03-26 05:00:00	0.1	2.3	27.9	1992-03-25 06:15:00	1992-03-25 06:15:00	1992-03-26 08:00:00	41	41	30	12145.6
47	1992-03-26 15:00:00	1992-03-27 15:29:58	1992-03-29	1.99995	34.8	30.2	1992-03-27 06:00:00	1992-03-28 02:00:00	1992-03-29 01:00:00	25.375	344	123.5	9.78537e+06
48	1992-04-01 18:00:00	1992-04-01 21:30:03	1992-04-02 12:00:00	3.79981	14.3	12.8	1992-04-02	1992-04-02 08:45:00	1992-04-04 20:00:00	84.25	184	52	5.59711e+06
49	1992-05-22 05:30:00	1992-05-23 01:52:04	1992-05-23 05:00:00	0.2	4.8	28.2	1992-05-22 05:45:00	1992-05-22 05:45:00	1992-05-23 06:00:00	0.59	0.59	0.52	194.845
50	1992-05-24 06:00:00	1992-05-24 14:29:57	1992-05-24 15:00:00	0.19993	0.5	37.3	1992-05-24 06:15:00	1992-05-24 07:30:00	1992-05-24 16:00:00	0.52	0.59	0.46	1973.77
51	1992-12-03 20:00:00	1992-12-04 04:29:57	1992-12-05 15:00:00	10.197	98.6	0.2	1992-12-04 01:00:00	1992-12-05 00:30:00	1992-12-05 17:00:00	1.1	265	44	4.03091e+06
52	1992-12-18 11:00:00	1992-12-18 15:29:58	1992-12-18 21:00:00	0.499965	2.7	0	1992-12-18 11:15:00	1992-12-18 11:15:00	1992-12-19 07:00:00	3.6	3.6	3.3	10263.4
53	1992-12-27 16:00:00	1992-12-28 01:29:58	1992-12-29 21:00:00	5.99956	62.2	0	1992-12-28	1992-12-28 14:00:00	1993-01-01 20:00:00	3.05	1740	31	9.23361e+07
54	1993-01-15 22:30:00	1993-01-16 12:30:01	1993-01-19 12:00:00	3.99941	85.1	43.7	1993-01-16 06:00:00	1993-01-17 07:30:00	1993-01-19 20:00:00	205.25	6970	292	1.46671e+08
55	1993-02-07 18:30:00	1993-02-08 15:29:57	1993-02-10 14:00:00	3.9988	80.6	0	1993-02-08 06:00:00	1993-02-09 15:30:00	1993-02-10 19:00:00	12	1560	188	6.45886e+07
56	1993-02-16 20:30:00	1993-02-16 21:00:00	1993-02-16 23:00:00	0.2	0.6	18	1993-02-16 20:45:00	1993-02-16 20:45:00	1993-02-17	60	62	58.5	6594.23
57	1993-02-18 13:00:00	1993-02-20 00:29:59	1993-02-20 19:00:00	2.79993	48.9	18.6	1993-02-18 14:00:00	1993-02-20	1993-02-22 03:00:00	44.25	1200	95	5.52319e+07
58	1993-03-28 18:00:00	1993-03-29 04:30:05	1993-03-29 19:00:00	3.19625	15.7	43.5	1993-03-28 21:00:00	1993-03-29 05:45:00	1993-03-30 19:00:00	53.5	241	76	9331875
59	1993-08-26 15:20:00	1993-08-27 09:18:35	1993-08-27 15:00:00	6.6	49	12	1993-08-27 06:00:00	1993-08-27 14:45:00	1993-08-29	0.605	1.6	0.78	58250.2
60	1993-08-28 06:00:00	1993-08-28 13:30:02	1993-08-28 16:00:00	0.399936	1.7	58.9	1993-08-28 06:15:00	1993-08-28 06:15:00	1993-08-28 18:00:00	1	1	0.86	1856.68
61	1993-08-29 03:00:00	1993-08-29 13:57:21	1993-08-29 17:00:00	4.5	21.6	60.6	1993-08-29 19:00:00	1993-08-29 19:30:00	1993-08-30 02:00:00	1.2	1.3	1	2436.43
62	1993-08-30 05:20:00	1993-08-30 06:29:58	1993-08-30 20:00:00	0.599899	4.2	82.2	1993-08-31 01:00:00	1993-08-31 03:00:00	1993-09-04 15:00:00	2.015	7	3.05	1.70341e+06
63	1993-08-31 13:00:00	1993-08-31 13:30:00	1993-08-31 15:00:00	0.1	0.3	76.5	1993-09-01 06:00:00	1993-09-01 08:00:00	1993-09-02 18:00:00	5.65	15	6.4	522037
64	1993-10-05 18:10:00	1993-10-06 14:29:58	1993-10-07 03:00:00	5.09979	57.3	0	1993-10-06 03:00:00	1993-10-07 06:45:00	1993-10-08 12:00:00	0.71	309	31	9.42283e+06
65	1993-11-11 02:12:00	1993-11-11 11:29:57	1993-11-11 18:00:00	3.49962	15.7	0	1993-11-11 12:00:00	1993-11-11 12:30:00	1993-11-12 09:00:00	2.2	2.3	2.1	10757.1
66	1993-11-14 06:00:00	1993-11-14 10:30:04	1993-11-15 17:00:00	6.79834	71.1	39.1	1993-11-14 10:00:00	1993-11-15 04:00:00	1993-11-16 17:00:00	2.85	420	65.75	2.48997e+07
67	1993-11-22 22:12:00	1993-11-23 03:46:12	1993-11-23 15:00:00	1.5	8.3	0	1993-11-23 03:00:00	1993-11-23 23:00:00	1993-11-25 02:00:00	17.5	73	31	3.35144e+06
68	1994-02-04 06:00:00	1994-02-04 06:30:00	1994-02-04 13:00:00	0.1	0.8	0	1994-02-04 06:15:00	1994-02-04 11:00:00	1994-02-05 01:00:00	1	1.1	1	4860
69	1994-02-07 16:00:00	1994-02-08 01:29:58	1994-02-08 19:00:00	5.59846	65.4	0.8	1994-02-07 18:00:00	1994-02-08 14:15:00	1994-02-10 22:00:00	1.25	198	31	1.39443e+07
70	1994-03-25 11:15:00	1994-03-25 17:30:05	1994-03-26 18:00:00	3.19927	29.9	19.3	1994-03-25 18:00:00	1994-03-26 22:00:00	1994-03-27 21:00:00	3.7	84	48.5	3774705
71	1994-04-24 15:30:00	1994-04-24 18:29:59	1994-04-25	1.59999	4.7	0	1994-04-24 15:45:00	1994-04-25 09:30:00	1994-04-25 10:00:00	0.53	0.71	0.65	254.034
72	1994-04-26 18:20:00	1994-04-27 00:29:58	1994-04-27 18:00:00	3.49903	29.1	6.1	1994-04-27 09:00:00	1994-04-28 18:00:00	1994-04-29 15:00:00	1.1	5.1	3.8	113299
73	1994-11-07 16:20:00	1994-11-07 16:50:00	1994-11-08 02:00:00	0.266667	1	11.5	1994-11-07 16:35:00	1994-11-07 16:45:00	1994-11-08 04:00:00	0.65	0.65	0.615	678.65
74	1994-11-11 16:00:00	1994-11-12 04:29:56	1994-11-12 11:00:00	6.39757	29.9	1.4	1994-11-12 07:00:00	1994-11-12 12:00:00	1994-11-12 23:00:00	1.2	1.9	1.3	19939.2
75	1994-11-26 16:00:00	1994-11-26 16:30:00	1994-11-26 19:00:00	0.3	0.7	0	1994-11-26 16:15:00	1994-11-26 16:15:00	1994-11-26 20:00:00	1.1	1.1	0.94	57.6
76	1994-12-04 18:04:36	1994-12-06 01:30:00	1994-12-06 05:00:00	2.79999	40.5	0	1994-12-05 09:00:00	1994-12-06 12:30:00	1994-12-07 22:00:00	1.1	128	31	5.52989e+06
77	1994-12-22 18:30:00	1994-12-23 03:29:55	1994-12-23 16:00:00	2.39784	12.7	0	1994-12-23 14:00:00	1994-12-23 14:15:00	1994-12-24 01:00:00	1.85	1.9	1.7	4148.18
78	1994-12-25 02:00:00	1994-12-26 05:30:02	1994-12-26 12:00:00	6.99723	33	12.7	1994-12-25 06:00:00	1994-12-26 10:45:00	1994-12-28 12:00:00	3.925	493	31	1.52631e+07
79	1995-01-03 21:00:00	1995-01-05 00:30:02	1995-01-06 08:00:00	5.29966	82.7	6.6	1995-01-04 10:00:00	1995-01-05 04:45:00	1995-01-07 21:00:00	11.25	3810	68	2.02343e+08
80	1995-01-25 03:00:00	1995-01-25 13:30:05	1995-01-26 22:00:00	4.29588	62	2.4	1995-01-25 13:00:00	1995-01-26 16:15:00	1995-01-27 15:00:00	7.85	1290	220.75	1.30007e+08
81	1995-02-12 20:00:00	1995-02-14 13:30:00	1995-02-15 19:00:00	5.29978	98.4	0	1995-02-13 14:00:00	1995-02-15 03:30:00	1995-02-16 23:00:00	6.4	6000	123	4.39703e+08
82	1995-02-26 06:00:00	1995-02-26 16:29:59	1995-02-27 05:00:00	0.399988	2.7	11.4	1995-02-26 06:15:00	1995-02-26 06:15:00	1995-02-27 07:00:00	19	19	15	37445.5
83	1995-02-28 11:01:52	1995-02-28 11:32:58	1995-02-28 17:00:00	3.2	12.1	5.3	1995-02-28 13:00:00	1995-03-01 16:45:00	1995-03-02 02:00:00	13.5	54	43	369018
84	1995-03-01 18:15:00	1995-03-01 19:29:59	1995-03-02	0.999898	2.1	17.6	1995-03-01 18:30:00	1995-03-01 18:30:00	1995-03-02 02:00:00	53	53	43	12300
85	1995-03-05 16:00:00	1995-03-05 21:30:05	1995-03-06 10:00:00	3.69895	30.9	14.8	1995-03-05 22:00:00	1995-03-06 08:15:00	1995-03-08 09:00:00	19.75	4220	77	1.58485e+08
86	1995-03-10 06:00:00	1995-03-11 09:30:02	1995-03-11 21:00:00	4.29981	24.3	30.9	1995-03-11 13:00:00	1995-03-11 21:30:00	1995-03-12 04:00:00	30.25	377	262.5	4.03465e+06
87	1995-04-15 09:00:00	1995-04-15 10:30:01	1995-04-15 13:00:00	0.199967	0.6	0	1995-04-15 09:15:00	1995-04-16 11:15:00	1995-04-16 12:00:00	1	1.1	1.025	101.881
88	1995-04-16 15:00:00	1995-04-16 19:29:58	1995-04-17 14:00:00	1.99979	10.8	0.6	1995-04-16 20:00:00	1995-04-18 07:45:00	1995-04-18 17:00:00	1.1	2.6	2.1	46755
89	1995-04-18 03:00:00	1995-04-18 05:30:02	1995-04-18 08:00:00	0.199934	0.7	11.4	1995-04-18 06:00:00	1995-04-19 05:30:00	1995-04-23 21:00:00	2.2	2.7	2.3	444829
90	1995-04-20 19:00:00	1995-04-21 07:30:02	1995-04-21 12:00:00	0.699814	4.4	28.8	1995-04-20 19:00:00	1995-04-20 21:00:00	1995-04-21 15:00:00	4.4	4.9	4	23314.5
91	1996-07-14 19:00:35	1996-07-14 19:30:35	1996-07-14 21:00:00	10.0636	16.6	29.2	1996-07-14 21:00:00	1996-07-14 22:15:00	1996-07-15 15:00:00	0.2925	0.53	0.33	8337.84
92	1996-07-15 11:00:00	1996-07-15 14:30:03	1996-07-15 16:00:00	2.2989	3.7	45.8	1996-07-15 22:00:00	1996-07-15 22:30:00	1996-07-17 07:00:00	71.0825	98	11	239851
93	1996-07-22 18:20:00	1996-07-22 18:50:00	1996-07-22 20:00:00	0.233333	0.4	0	1996-07-22 18:35:00	1996-07-22 18:45:00	1996-07-23 01:00:00	0.53	0.53	0.47	498.96
94	1996-07-25 18:02:36	1996-07-25 19:30:00	1996-07-25 22:00:00	8.09813	11.3	2.8	1996-07-25 19:00:00	1996-07-26 02:45:00	1996-07-27 16:00:00	0.1975	99	13	4.59201e+06
95	1996-07-30 15:20:00	1996-07-30 16:29:58	1996-07-30 17:00:00	0.399966	0.7	22.6	1996-07-30 15:35:00	1996-07-30 15:45:00	1996-07-30 18:00:00	3.4	3.2	2.9	240
96	1996-08-01 12:00:00	1996-08-01 20:30:03	1996-08-02 02:00:00	4.29686	6.3	12	1996-08-02 20:00:00	1996-08-02 21:30:00	1996-08-04 23:00:00	0.8275	2470	17	2.22038e+07
97	1996-09-09 21:30:00	1996-09-10 00:40:01	1996-09-10 02:00:00	0.533204	1.5	35.7	1996-09-09 21:45:00	1996-09-09 21:45:00	1996-09-10 04:00:00	2.7	2.7	2.6	993.6
98	1996-09-13 13:15:00	1996-09-13 18:29:58	1996-09-14 12:00:00	6.79911	20.4	31.6	1996-09-13 17:00:00	1996-09-13 23:30:00	1996-09-14 16:00:00	19	224	69.25	4.0811e+06
99	1996-09-17 03:00:00	1996-09-17 08:29:59	1996-09-17 10:00:00	2.89998	7.1	20.6	1996-09-17 09:00:00	1996-09-17 19:45:00	1996-09-19 07:00:00	20	34	22	817552
100	1997-01-12 07:00:00	1997-01-13 03:29:59	1997-01-14 12:00:00	3.79996	88.4	0.5	1997-01-13 03:00:00	1997-01-14 05:30:00	1997-01-15 02:00:00	1.1	574	90	1.65509e+07
101	1997-01-25 21:00:00	1997-01-26 21:29:58	1997-01-27 05:00:00	7.3971	24	0	1997-01-26 08:00:00	1997-01-27 05:15:00	1997-01-29	14.5	277	56	1.63121e+07
102	1997-02-25 10:00:00	1997-02-25 10:30:00	1997-02-25 15:00:00	0.1	0.6	0	1997-02-25 10:15:00	1997-02-26 10:15:00	1997-02-26 18:00:00	0.94	1	0.97	955.949
103	1997-02-26 06:00:00	1997-02-27 19:29:55	1997-02-28 08:00:00	4.0999	54.8	0.6	1997-02-27 16:00:00	1997-02-28 05:15:00	1997-02-28 14:00:00	1.3	277	139.5	3.46808e+06
104	1997-04-05 01:00:00	1997-04-05 05:29:58	1997-04-05 14:00:00	1.19982	7.4	39.1	1997-04-05 01:00:00	1997-04-05 18:00:00	1997-04-06 22:00:00	26	99	45.25	3.43946e+06
105	1997-12-01 18:00:00	1997-12-01 20:32:38	1997-12-02 03:00:00	0.3	1.6	1.1	1997-12-01 18:15:00	1997-12-02 11:00:00	1997-12-03 01:00:00	0.37	0.42	0.37	2475
106	1997-12-06 14:00:00	1997-12-07 22:29:55	1997-12-08 21:00:00	3.49839	45.5	1.6	1997-12-07 03:00:00	1997-12-08 14:15:00	1997-12-10 04:00:00	0.7825	73	12	3.13522e+06
107	1997-12-20 01:00:00	1997-12-20 05:42:00	1997-12-20 07:00:00	0.45999	1.1	0.2	1997-12-20 01:15:00	1997-12-20 01:15:00	1997-12-20 08:00:00	0.86	0.94	0.9	1000.67
108	1997-12-21 15:00:00	1997-12-22 04:29:57	1997-12-23 07:00:00	3.19978	24.1	1.3	1997-12-22	1997-12-23 06:00:00	1997-12-24 01:00:00	1.175	31	21	955514
109	1998-01-03	1998-01-04 20:30:04	1998-01-05 05:00:00	2.39989	17	0	1998-01-03 11:00:00	1998-01-05 13:45:00	1998-01-06 11:00:00	8.75	45	28	1.26816e+06
110	1998-01-09 16:30:00	1998-01-10 13:30:03	1998-01-10 19:00:00	2.19954	13.4	0	1998-01-10 17:00:00	1998-01-11 13:15:00	1998-01-12 14:00:00	8.6	16	14	319167
111	1998-01-29 13:30:00	1998-01-29 14:00:00	1998-01-29 16:00:00	0.15	0.4	0	1998-01-29 13:45:00	1998-01-29 13:45:00	1998-01-29 19:00:00	1	1	0.97	283.5
112	1998-01-30 01:20:00	1998-01-30 01:50:00	1998-01-30 03:00:00	0.266667	0.5	0.4	1998-01-30 01:35:00	1998-01-30 01:45:00	1998-01-30 23:00:00	0.94	0.94	0.86	2744.47
113	1998-02-03 21:06:39	1998-02-03 23:29:58	1998-02-04 20:00:00	4.89942	37.5	0.9	1998-02-03 23:00:00	1998-02-05 00:15:00	1998-02-05 17:00:00	0.78	124	64	3.47141e+06
114	1998-02-05 03:10:00	1998-02-05 04:29:59	1998-02-05 05:00:00	1.5	2.1	37.5	1998-02-05 03:25:00	1998-02-05 03:30:00	1998-02-05 17:00:00	113	111	64	1150
115	1998-02-06 21:00:00	1998-02-07 05:30:03	1998-02-07 11:00:00	1.49942	6.9	39.6	1998-02-06 23:00:00	1998-02-08	1998-02-08 03:00:00	50.5	62	58.75	126872
116	1998-02-08 06:12:00	1998-02-09 02:29:58	1998-02-09 21:00:00	2.79986	32.4	46.5	1998-02-08 10:00:00	1998-02-09 18:45:00	1998-02-10 19:00:00	54.25	344	116.5	2.5142e+07
117	1998-02-14 18:00:00	1998-02-15 01:30:02	1998-02-15 21:00:00	4.59897	26.2	0	1998-02-15 01:00:00	1998-02-15 08:15:00	1998-02-16 17:00:00	29	221	74	9.33612e+06
118	1998-02-23 06:00:00	1998-02-24 12:30:05	1998-02-25 18:00:00	5.7996	35.8	18	1998-02-23 06:00:00	1998-02-25 21:15:00	1998-02-26 19:00:00	31.25	154	80	8.08903e+06
119	1998-03-25 01:04:17	1998-03-25 01:34:17	1998-03-25 03:00:00	1.32856	1.8	0	1998-03-25 01:19:17	1998-03-25 01:30:00	1998-03-25 12:00:00	12	12	11	15900
120	1998-03-25 23:05:27	1998-03-26 04:30:02	1998-03-29 21:00:00	6.89824	85.7	1.8	1998-03-26 06:00:00	1998-03-28 20:45:00	1998-03-30 16:00:00	10.25	2870	145.75	8.43294e+07
121	1998-11-26 06:00:00	1998-11-28 10:30:01	1998-11-29 18:00:00	4.99872	24.6	0	1998-11-29	1998-11-29 00:30:00	1998-11-29 19:00:00	0.8025	0.86	0.47	420.188
122	1998-12-02 10:30:00	1998-12-02 15:30:02	1998-12-02 20:00:00	1.8996	9.5	0.6	1998-12-02 14:00:00	1998-12-03 20:00:00	1998-12-06 02:00:00	1.8	5.4	4.2	674023
123	1999-02-04 13:00:00	1999-02-04 16:29:57	1999-02-06 05:00:00	2.7989	28.5	0	1999-02-04 13:15:00	1999-02-05 01:15:00	1999-02-06 06:00:00	0.47	1	0.78	27700.8
124	1999-04-03 19:00:00	1999-04-04 06:30:01	1999-04-04 17:00:00	6.79913	35.9	75.5	1999-04-04 08:00:00	1999-04-05 04:00:00	1999-04-05 14:00:00	5.734	21	17	805090
125	1999-04-07 14:00:00	1999-04-07 15:30:01	1999-04-07 18:00:00	0.599835	1	35.9	1999-04-07 21:00:00	1999-04-08 00:15:00	1999-04-08 22:00:00	41	104	42	2198277
126	1999-07-24 13:30:00	1999-07-24 16:29:59	1999-07-24 17:00:00	0.906378	1.6	12.1	1999-07-24 17:00:00	1999-07-24 18:15:00	1999-07-27 06:00:00	1.1175	28	7.3	2.25566e+06
127	1999-07-27 05:20:00	1999-07-27 06:30:04	1999-07-27 08:00:00	1.39879	2.1	15.2	1999-07-27 05:35:00	1999-07-27 05:45:00	1999-07-27 10:00:00	7.6	7.6	7	1683.53
128	1999-07-27 15:30:00	1999-07-27 16:30:03	1999-07-28 02:00:00	1.89822	2.5	13.7	1999-07-27 15:45:00	1999-07-27 15:45:00	1999-07-28 04:00:00	5.6	5.4	3.8	257.143
129	1999-07-29 13:02:43	1999-07-29 13:32:43	1999-07-29 15:00:00	2.11811	2.6	15.9	1999-07-30 10:00:00	1999-07-30 12:45:00	1999-07-31 21:00:00	2.675	3.4	2.7	72731.4
130	1999-07-30 13:06:00	1999-07-30 13:36:00	1999-07-30 19:00:00	0.903	1.4	10.3	1999-07-31 02:00:00	1999-07-31 03:30:00	1999-07-31 13:00:00	3.4	3.6	3.2	9094.09
131	1999-09-11 12:07:30	1999-09-11 18:30:00	1999-09-12 05:00:00	0.999982	6.4	0	1999-09-11 14:00:00	1999-09-11 15:15:00	1999-09-12 06:00:00	0.3025	29	1.3	271748
132	1999-09-14 09:20:00	1999-09-14 13:30:02	1999-09-15 19:00:00	6.09608	32.9	6.4	1999-09-14 18:00:00	1999-09-15 06:45:00	1999-09-16 17:00:00	1.875	95	18	4.06242e+06
133	2000-03-04 21:12:00	2000-03-06 01:30:01	2000-03-07 16:00:00	5.79983	118.1	0	2000-03-05 09:00:00	2000-03-06 10:15:00	2000-03-07 20:00:00	0.845	121	39	3.983e+06
134	2000-10-25 06:00:00	2000-10-26 01:57:43	2000-10-26 05:00:00	0.1	2.4	95.9	2000-10-25 06:15:00	2000-10-25 06:15:00	2000-10-26 13:00:00	70	69	26	1024.39
135	2000-10-28 05:00:00	2000-10-28 10:29:59	2000-10-28 15:00:00	0.399998	2.2	65.8	2000-10-28 05:15:00	2000-10-28 05:15:00	2000-10-30 16:00:00	284	274	31	0
136	2000-10-30 14:00:00	2000-10-30 18:29:58	2000-10-30 21:00:00	6.59925	22.9	31.5	2000-10-30 17:00:00	2000-10-31 00:15:00	2000-11-02 13:00:00	31.75	660	39	2.38034e+07
137	2000-10-31 12:02:24	2000-10-31 12:32:24	2000-10-31 18:00:00	2.403	3	52	2000-10-31 12:17:24	2000-10-31 12:30:00	2000-11-02 13:00:00	166	164	39	0
138	2000-11-04 03:03:19	2000-11-04 03:36:49	2000-11-04 14:00:00	1.9	10.8	26.1	2000-11-04 13:00:00	2000-11-05 11:30:00	2000-11-05 23:00:00	21.25	36	32	539615
139	2000-11-11 14:00:00	2000-11-11 23:29:58	2000-11-12	0.399926	2	18.7	2000-11-11 14:00:00	2000-11-12 05:30:00	2000-11-12 13:00:00	34	38	36	65660.9
140	2001-01-29 01:00:00	2001-01-29 01:30:00	2001-01-29 05:00:00	0.1	0.5	29.2	2001-01-29 07:00:00	2001-01-29 12:30:00	2001-01-30	11	13	12	62126.5
141	2001-02-11 06:00:00	2001-02-12 02:58:09	2001-02-12 05:00:00	0.1	2.3	1.4	2001-02-11 06:15:00	2001-02-11 06:15:00	2001-02-12 06:00:00	6.6	6.6	5.6	1288.42
142	2001-02-13 12:15:00	2001-02-13 15:30:01	2001-02-14 15:00:00	2.89996	33.5	3.7	2001-02-13 21:00:00	2001-02-14 22:15:00	2001-02-15 17:00:00	4.65	80	51	3.74653e+06
143	2001-02-25 18:00:00	2001-02-25 23:49:44	2001-02-26 20:00:00	1.4	9.7	2.4	2001-02-25 18:15:00	2001-02-25 18:15:00	2001-02-26 23:00:00	12	12	10	22914.8
144	2001-02-27 15:15:00	2001-02-27 18:30:01	2001-03-01 17:00:00	2.3998	29.1	12.1	2001-02-27 22:00:00	2001-02-28 23:00:00	2001-03-01 18:00:00	9.4	143	75	4798710
145	2001-04-05 05:12:00	2001-04-05 20:29:58	2001-04-06 10:00:00	4.89856	42.9	0	2001-04-05 18:00:00	2001-04-06 07:00:00	2001-04-09 04:00:00	1.2	494	34	2.62514e+07
146	2001-04-08 05:02:00	2001-04-08 05:32:00	2001-04-08 10:00:00	2.99375	7.7	42.9	2001-04-08 05:17:00	2001-04-08 05:30:00	2001-04-09 04:00:00	53	53	34	140
147	2001-04-10 05:10:00	2001-04-10 07:30:01	2001-04-10 17:00:00	2.19974	12.5	50.6	2001-04-10 07:00:00	2001-04-11 00:15:00	2001-04-11 16:00:00	24	36	30	421323
148	2001-08-08 05:20:00	2001-08-08 23:30:00	2001-08-09 01:00:00	5.9985	14.8	34.5	2001-08-08 05:35:00	2001-08-09 01:00:00	2001-08-10 12:00:00	0.02	0.23	0.07	20169
149	2001-08-09 13:00:00	2001-08-09 18:30:05	2001-08-11	4.79367	15.4	42.9	2001-08-10 21:00:00	2001-08-11 13:00:00	2001-08-13 14:00:00	1.3025	10	3.3	734728
150	2003-02-12 15:05:27	2003-02-13 09:29:59	2003-02-14 05:00:00	7.3	97.3	3.1	2003-02-13 02:00:00	2003-02-14 05:00:00	2003-02-16 13:00:00	0.7	509	30	4.72219e+07
151	2003-02-24 06:00:00	2003-02-24 07:30:01	2003-02-24 09:00:00	0.199967	0.5	0	2003-02-24 06:15:00	2003-02-24 06:15:00	2003-02-24 10:00:00	2.5	2.5	2.4	168
152	2003-02-24 17:30:00	2003-02-25 19:29:57	2003-02-28 18:00:00	6.4989	100.6	0.5	2003-02-25 10:00:00	2003-02-27 16:15:00	2003-03-01 16:00:00	2.25	567	122.5	7.25558e+07
153	2003-03-05 03:00:00	2003-03-05 04:49:57	2003-03-05 07:00:00	0.233317	0.6	12.1	2003-03-05 20:00:00	2003-03-06	2003-03-06 20:00:00	77.75	95	67	769441
154	2004-02-22 22:00:00	2004-02-23 05:30:02	2004-02-23 17:00:00	5.7975	28	0.1	2004-02-23 06:00:00	2004-02-23 11:30:00	2004-02-23 20:00:00	0.445	0.94	0.765	10852.4
155	2004-02-24 11:30:00	2004-02-24 12:00:00	2004-02-24 13:00:00	0.15	0.3	28.1	2004-02-24 11:45:00	2004-02-24 11:45:00	2004-02-24 14:00:00	0.41	0.41	0.38	84
156	2004-02-27 07:00:00	2004-02-27 12:30:05	2004-02-28 15:00:00	1.89933	8.8	28.4	2004-02-27 08:00:00	2004-02-28 18:00:00	2004-02-29 21:00:00	1.3	10	7.7	333862
157	2004-03-04 08:30:00	2004-03-04 16:29:59	2004-03-05 11:00:00	1.99995	13.7	0	2004-03-06 02:00:00	2004-03-06 04:30:00	2004-03-07 04:00:00	5.2	12	10	364272
158	2004-03-11 18:00:00	2004-03-11 18:30:00	2004-03-11 20:00:00	0.1	0.3	0	2004-03-11 18:15:00	2004-03-11 18:15:00	2004-03-11 22:00:00	2.4	2.4	2.3	252
159	2004-03-12 16:00:00	2004-03-12 19:29:57	2004-03-13 07:00:00	6.49644	12.2	0.3	2004-03-12 19:00:00	2004-03-13 21:30:00	2004-03-14 18:00:00	2.3	19	14	438938
160	2004-04-03 12:00:00	2004-04-03 13:41:56	2004-04-03 19:00:00	0.43989	1.2	49.8	2004-04-03 23:00:00	2004-04-04 01:30:00	2004-04-04 18:00:00	1.35	3.6	3	75096.1
161	2004-04-04 14:00:00	2004-04-04 14:30:00	2004-04-04 16:00:00	0.2	0.4	51	2004-04-04 14:15:00	2004-04-04 14:15:00	2004-04-04 18:00:00	3.1	3.1	3	546
162	2004-04-05 13:03:00	2004-04-05 17:29:58	2004-04-05 21:00:00	2.99883	10.3	51.4	2004-04-05 18:00:00	2004-04-06 21:00:00	2004-04-09 18:00:00	2.4	4.9	4.1	560564
163	2004-07-16 13:00:27	2004-07-16 14:29:58	2004-07-16 17:00:00	21.5922	39.8	8.2	2004-07-16 15:00:00	2004-07-16 15:45:00	2004-07-16 19:00:00	0.27	0.46	0	937.125
164	2004-07-25 14:08:34	2004-07-25 22:34:37	2004-07-26 04:00:00	1.37658	5.4	15.9	2004-07-26 02:00:00	2004-07-26 02:30:00	2004-07-26 16:00:00	11	14	2.85	23820.3
165	2004-08-14 14:00:00	2004-08-15 00:20:22	2004-08-15 01:00:00	0.2	1.1	17.4	2004-08-14 14:15:00	2004-08-14 14:15:00	2004-08-15 03:00:00	0.23	0.23	0.21	248.118
166	2004-08-16 14:20:00	2004-08-16 15:29:58	2004-08-16 18:00:00	0.599899	1	19.1	2004-08-16 20:00:00	2004-08-16 20:45:00	2004-08-18 16:00:00	67.4	245	2.825	956532
167	2004-08-17 13:10:00	2004-08-17 13:40:00	2004-08-17 15:00:00	0.533333	0.8	16	2004-08-17 13:25:00	2004-08-17 13:30:00	2004-08-18 16:00:00	12	12	2.825	393.75
168	2004-08-18 12:12:00	2004-08-18 16:30:03	2004-08-18 19:00:00	3.69895	12.4	14.1	2004-08-18 21:00:00	2004-08-18 21:45:00	2004-08-20 19:00:00	45.3	173	3.4	956947
169	2004-09-18 17:15:00	2004-09-19 15:30:00	2004-09-20	14.5996	103.4	0	2004-09-19 04:00:00	2004-09-19 19:15:00	2004-09-21 15:00:00	0.3425	1100	11	2.76315e+07
170	2004-10-27 22:08:34	2004-10-28 07:30:01	2004-10-28 17:00:00	5.89969	47.5	2.7	2004-10-27 22:23:34	2004-10-28 07:00:00	2004-10-30 04:00:00	17	1520	298	1.62822e+08
171	2004-11-13 09:00:00	2004-11-13 15:29:55	2004-11-13 16:00:00	0.30719	1.1	0	2004-11-13 09:15:00	2004-11-13 09:15:00	2004-11-13 21:00:00	1.1	1.1	0.94	5201.78
172	2004-11-15 10:00:00	2004-11-15 11:30:01	2004-11-15 19:00:00	0.22498	0.5	1.1	2004-11-15 10:15:00	2004-11-16 08:25:00	2004-11-16 21:00:00	0.83	0.84	0.83	666
173	2004-11-20 22:30:00	2004-11-21 04:30:03	2004-11-22 17:00:00	6.997	61.6	0.5	2004-11-21 05:00:00	2004-11-21 13:45:00	2004-11-25 03:00:00	1.325	642	39	4.29847e+07
174	2004-12-28 15:00:00	2004-12-29 04:29:57	2004-12-29 23:00:00	8.49757	90	2.4	2004-12-28 21:00:00	2004-12-29 14:35:00	2004-12-31 12:00:00	1.6	6970	86.25	2.60041e+08
175	2005-01-03 00:20:00	2005-01-03 16:30:04	2005-01-05 04:00:00	6.79912	111.2	90	2005-01-03 06:00:00	2005-01-04 02:10:00	2005-01-05 14:00:00	21.75	4100	289.5	319282407
176	2005-02-10 14:05:00	2005-02-11 17:30:01	2005-02-12 18:00:00	5.79902	107.2	15.1	2005-02-10 23:00:00	2005-02-12 02:05:00	2005-02-16 01:00:00	14.5	4680	54	3.45598e+08
177	2005-02-15 10:00:00	2005-02-15 20:29:59	2005-02-15 23:00:00	0.199996	1.2	107.2	2005-02-15 10:15:00	2005-02-15 10:30:00	2005-02-16 01:00:00	67	67	54	4393.22
178	2005-02-17 16:30:00	2005-02-19 02:29:54	2005-02-19 12:00:00	8.29167	62.7	1.2	2005-02-18 02:00:00	2005-02-19 05:20:00	2005-02-20 03:00:00	31.25	2230	345.857	1.05596e+08
179	2005-02-20 01:01:30	2005-02-20 01:31:30	2005-02-20 11:00:00	3.99783	12.2	63.9	2005-02-20 04:00:00	2005-02-20 05:30:00	2005-02-21 20:00:00	780.875	1360	107	6.71904e+06
180	2005-02-21 18:00:00	2005-02-22 18:30:52	2005-02-23	6.50294	24.8	74.9	2005-02-21 22:00:00	2005-02-22 11:45:00	2005-02-24 09:00:00	110	673	99.5	32615550
181	2005-02-26 14:30:00	2005-02-26 15:30:03	2005-02-27 01:00:00	0.999131	2.5	26.5	2005-02-26 14:45:00	2005-02-26 14:45:00	2005-02-27 08:00:00	71	71	59.75	39575.5
182	2005-03-04 21:06:00	2005-03-05 01:30:46	2005-03-06	8.06839	41.2	0	2005-03-05 01:00:00	2005-03-05 08:45:00	2005-03-06 20:00:00	16	601	58	13148550
183	2005-04-23 17:02:08	2005-04-23 22:30:01	2005-04-24 16:00:00	8.99962	38.6	0	2005-04-23 22:00:00	2005-04-24 01:15:00	2005-04-25 06:00:00	1.25	1040	21	2.11567e+07
184	2005-07-23 13:00:00	2005-07-23 21:29:27	2005-07-24 01:00:00	11.6999	27.9	8.4	2005-07-23 20:00:00	2005-07-23 23:25:00	2005-07-25 09:00:00	0.81	2120	4.7	1.72286e+07
185	2005-07-26 03:00:00	2005-07-26 03:30:00	2005-07-26 05:00:00	0.2	0.4	37.6	2005-07-26 03:15:00	2005-07-26 03:15:00	2005-07-26 07:00:00	3	3	2.7	108
186	2005-07-29 17:15:00	2005-07-29 18:29:59	2005-07-29 20:00:00	1.39983	1.9	4.9	2005-07-30	2005-07-30 00:45:00	2005-07-31 06:00:00	19.41	71	3.1	387647
187	2005-07-30 14:04:17	2005-07-30 14:34:17	2005-07-30 20:00:00	1.31428	2.4	6.8	2005-07-31 07:00:00	2005-07-31 07:30:00	2005-07-31 17:00:00	7.225	8.9	4.6	25914.4
188	2005-07-31 16:03:09	2005-07-31 17:30:03	2005-08-01 05:00:00	13.4873	30.4	5.3	2005-07-31 18:00:00	2005-08-01 03:45:00	2005-08-01 15:00:00	5.05	9.2	3.8	71054.5
189	2005-08-06 13:00:00	2005-08-07 01:50:10	2005-08-07 05:00:00	0.2	1.4	39.3	2005-08-06 13:15:00	2005-08-06 13:15:00	2005-08-07 10:00:00	11	11	5.4	119.277
190	2005-08-09 16:30:00	2005-08-09 19:30:05	2005-08-09 21:00:00	1.89832	5.2	8.9	2005-08-10 10:00:00	2005-08-10 11:00:00	2005-08-11 08:00:00	13.8	49	3.8	245189
191	2005-08-11 12:08:34	2005-08-11 12:38:34	2005-08-11 14:00:00	0.685667	1.3	15.7	2005-08-11 14:00:00	2005-08-11 18:00:00	2005-08-12 16:00:00	3.8	183	6.725	1879740
192	2005-08-11 22:00:00	2005-08-12 16:29:57	2005-08-13 04:00:00	4.79807	18.9	17	2005-08-11 22:15:00	2005-08-11 22:15:00	2005-08-13 05:00:00	44	41	4.7	0
193	2005-08-13 18:03:09	2005-08-13 18:33:09	2005-08-14 05:00:00	1.80525	3.2	27.2	2005-08-14 22:00:00	2005-08-14 22:05:00	2005-08-15 23:00:00	1239.65	1930	12	1.71642e+06
194	2005-10-17 13:20:00	2005-10-18 12:30:00	2005-10-18 16:00:00	7.89808	26	0	2005-10-18 15:00:00	2005-10-18 15:15:00	2005-10-20 07:00:00	597.125	987	1.6	557061
195	2006-03-08 12:15:00	2006-03-08 14:30:00	2006-03-08 17:00:00	0.799883	1.6	0	2006-03-08 12:30:00	2006-03-08 15:00:00	2006-03-09 16:00:00	0.41	0.46	0.435	3282.95
196	2006-03-11 00:20:00	2006-03-11 07:29:59	2006-03-12 16:00:00	5.29998	49.8	1.7	2006-03-11 06:00:00	2006-03-11 21:00:00	2006-03-12 17:00:00	0.5425	1.2	0.64	45804
197	2006-03-19 07:15:00	2006-03-20 03:29:57	2006-03-20 05:00:00	2.89862	8.9	0	2006-03-19 15:00:00	2006-03-20 21:45:00	2006-03-25 03:00:00	3.2	3.8	3.6	663988
198	2006-03-21 14:30:00	2006-03-21 15:30:03	2006-03-21 18:00:00	1.4999	3.2	8.9	2006-03-22 02:00:00	2006-03-22 05:30:00	2006-03-22 23:00:00	4.025	11	6.3	218629
199	2006-08-07 16:30:00	2006-08-07 18:29:58	2006-08-07 21:00:00	3.19994	8.1	0.5	2006-08-08	2006-08-08 00:45:00	2006-08-08 06:00:00	17.75	55	9.925	231117
200	2006-08-08 22:30:00	2006-08-09 02:11:40	2006-08-09 05:00:00	0.5	2.1	9.6	2006-08-08 22:45:00	2006-08-08 22:45:00	2006-08-09 09:00:00	1.8	1.8	0.97	168.915
201	2006-08-10 12:06:00	2006-08-10 14:30:01	2006-08-10 22:00:00	0.999592	2.3	11.4	2006-08-11 12:00:00	2006-08-11 17:00:00	2006-08-12 17:00:00	0.6475	2	0.75	66169.9
202	2006-08-11 20:03:00	2006-08-11 20:33:00	2006-08-12 07:00:00	1.94511	4.8	13.7	2006-08-11 20:18:00	2006-08-11 20:30:00	2006-08-12 11:00:00	1.8	1.8	1	440.69
203	2006-08-12 17:01:30	2006-08-12 17:31:30	2006-08-12 19:00:00	3.93502	5.4	18.5	2006-08-12 19:00:00	2006-08-12 19:45:00	2006-08-13 03:00:00	1.17	1.4	0.985	4134.23
204	2006-08-13 22:00:00	2006-08-13 22:30:00	2006-08-14 04:00:00	0.1	0.7	15.8	2006-08-14 15:00:00	2006-08-14 21:00:00	2006-08-15 22:00:00	3.56	39	1.4	389286
205	2006-08-15 07:00:00	2006-08-15 09:32:56	2006-08-15 19:00:00	1.90986	3.4	42.1	2006-08-15 07:15:00	2006-08-15 07:15:00	2006-08-15 22:00:00	4.3	4.1	1.4	47.2881
206	2006-08-22 14:03:00	2006-08-22 14:33:00	2006-08-22 16:00:00	1.94	2.8	0	2006-08-22 14:18:00	2006-08-23 11:15:00	2006-08-23 15:00:00	0.25	0.28	0.25	351
207	2006-08-24 05:00:00	2006-08-24 09:29:58	2006-08-24 14:00:00	5.49858	9.9	12.2	2006-08-24 10:00:00	2006-08-24 21:15:00	2006-08-25 19:00:00	0.9725	8	1.8	223002
208	2006-08-30 17:00:00	2006-08-30 18:30:01	2006-08-30 20:00:00	1.5995	3	0.1	2006-08-31 17:00:00	2006-08-31 18:30:00	2006-09-01 07:00:00	0.5975	1	0.655	9492.55
209	2006-09-01 23:00:00	2006-09-01 23:30:00	2006-09-02 04:00:00	0.1	0.5	3.2	2006-09-01 23:15:00	2006-09-01 23:15:00	2006-09-02 13:00:00	0.38	0.38	0.35	742.5
210	2006-09-03 13:30:00	2006-09-03 19:30:33	2006-09-04 04:00:00	9.53575	15.9	10	2006-09-03 20:00:00	2006-09-03 22:00:00	2006-09-04 06:00:00	4.175	16	1.8	66498.8
211	2006-09-04 14:30:00	2006-09-04 15:29:57	2006-09-05 04:00:00	0.999464	5.1	25.9	2006-09-04 14:45:00	2006-09-04 14:45:00	2006-09-05 09:00:00	3	2.8	1.3	462.329
212	2006-09-09 09:01:56	2006-09-09 10:29:56	2006-09-09 12:00:00	3.79865	7.1	31.6	2006-09-09 11:00:00	2006-09-09 20:30:00	2006-09-10 21:00:00	1.525	11	1.3	226085
213	2007-01-30 05:12:00	2007-01-31 06:30:04	2007-02-01 11:00:00	4.79575	35.3	0	2007-02-01 11:00:00	2007-02-02 07:15:00	2007-02-02 18:00:00	2.07	15	11	653626
214	2007-02-12 01:00:00	2007-02-12 03:29:56	2007-02-12 04:00:00	0.999394	1.5	9.4	2007-02-12 10:00:00	2007-02-12 14:30:00	2007-02-16 21:00:00	1.425	4.1	3.4	1.20818e+06
215	2007-02-14 10:00:00	2007-02-14 17:29:56	2007-02-14 18:00:00	0.214021	1	16.4	2007-02-14 10:15:00	2007-02-14 10:15:00	2007-02-15 04:00:00	9.9	10	7.1	23985
216	2007-02-19 12:04:00	2007-02-19 15:29:57	2007-02-19 23:00:00	4.79816	13.2	1	2007-02-19 17:00:00	2007-02-20 05:00:00	2007-02-21 23:00:00	2.025	92	20	5.66521e+06
217	2007-03-21 21:00:00	2007-03-22 22:29:59	2007-03-23 17:00:00	5.29975	33.1	0	2007-03-24 04:00:00	2007-03-24 17:00:00	2007-03-28 14:00:00	0.7675	2.4	1.9	685291
218	2007-03-24 02:00:00	2007-03-24 05:29:57	2007-03-24 06:00:00	1.00363	1.3	33.1	2007-03-24 04:00:00	2007-03-25 03:15:00	2007-03-26 16:00:00	0.7675	4.5	3.4	305192
219	2007-07-29 21:03:19	2007-07-29 21:33:19	2007-07-29 23:00:00	1.84987	2.9	27.5	2007-07-29 21:18:19	2007-07-29 21:30:00	2007-07-30	0.5	0.5	0.46	21.6
220	2007-07-30 14:15:00	2007-07-30 14:45:18	2007-07-30 16:00:00	0.4	0.8	30.4	2007-07-30 14:30:00	2007-07-30 14:30:00	2007-07-30 17:00:00	0.34	0.31	0.28	0
221	2008-12-17 20:30:00	2008-12-18 03:29:58	2008-12-18 14:00:00	5.59822	18.7	62.8	2008-12-18 06:00:00	2008-12-18 08:45:00	2008-12-21 07:00:00	135.5	814	38.5	1.96594e+07
222	2008-12-22 16:20:00	2008-12-22 21:30:03	2008-12-23 03:00:00	2.79881	12.3	18.7	2008-12-22 21:00:00	2008-12-23 13:45:00	2008-12-24 09:00:00	23.55	52.1	42.1	991313
223	2008-12-24 21:12:00	2008-12-25 23:29:59	2008-12-26 05:00:00	7.49907	49.4	12.3	2008-12-25	2008-12-26 05:30:00	2008-12-29 05:00:00	36.6	3330	42.1	126979200
224	2009-02-07 22:07:30	2009-02-09 20:29:59	2009-02-10 06:00:00	5.89977	87.1	0	2009-02-08 02:00:00	2009-02-09 22:30:00	2009-02-10 16:00:00	1.71	1850	207	5.62969e+07
225	2009-11-28 17:04:36	2009-11-28 17:34:36	2009-11-28 23:00:00	1.3844	2.7	0	2009-11-28 17:19:36	2009-11-29 03:45:00	2009-11-29 05:00:00	0.25	0.28	0.2575	113.576
226	2009-11-29 15:05:27	2009-11-29 15:35:27	2009-11-29 22:00:00	1.0026	1.5	2.7	2009-11-29 15:20:27	2009-11-29 15:30:00	2009-11-30 19:00:00	0.25	0.25	0.235	742.5
227	2009-12-07 07:12:00	2009-12-07 23:29:59	2009-12-08 02:00:00	9.2993	69.8	0	2009-12-07 13:00:00	2009-12-08 04:15:00	2009-12-10 17:00:00	0.4775	188	2.4	5.00557e+06
228	2010-01-18 09:00:00	2010-01-19 21:30:00	2010-01-20 02:00:00	8.29972	44	0	2010-01-19 22:00:00	2010-01-20 01:40:00	2010-01-21 03:00:00	0.7725	1040	33	2.00631e+07
229	2010-01-20 17:30:00	2010-01-21 22:29:54	2010-01-23 04:00:00	35.965	177.5	44	2010-01-21 04:00:00	2010-01-21 22:45:00	2010-01-24 17:00:00	36.425	7300	221	5.57736e+08
230	2010-02-20 11:04:36	2010-02-21 04:30:01	2010-02-21 17:00:00	4.29887	25.6	0	2010-02-21	2010-02-22 17:00:00	2010-02-23 13:00:00	5.7825	242	86.525	1.95062e+07
231	2010-02-27 23:20:00	2010-02-28 01:29:53	2010-02-28 20:00:00	5.09596	20.6	6.2	2010-02-28 01:00:00	2010-03-01 02:15:00	2010-03-03 03:00:00	22.9	123	42.1	1.00476e+07
232	2010-10-05 05:15:00	2010-10-05 14:29:56	2010-10-06 03:00:00	5.99798	33.9	7.6	2010-10-05 14:00:00	2010-10-05 16:00:00	2010-10-06 08:00:00	5.5125	23.1	0.925	75047.9
233	2010-12-21 14:00:00	2010-12-21 20:30:01	2010-12-22	1.89984	7.1	13.7	2010-12-22 21:00:00	2010-12-23	2010-12-23 10:00:00	0.7275	1.09	0.7	15346.9
234	2010-12-22 13:15:00	2010-12-22 20:30:00	2010-12-23 04:00:00	5.59967	21.9	7.8	2010-12-22 21:00:00	2010-12-23 15:00:00	2010-12-25 01:00:00	0.7275	39.4	9.89	1.7089e+06
235	2010-12-29 11:03:31	2010-12-30 01:30:05	2010-12-30 14:00:00	5.59964	55	0.1	2010-12-29 13:00:00	2010-12-30 05:00:00	2011-01-01 22:00:00	2.465	685	14.2	2.39619e+07
236	2011-02-19 02:08:34	2011-02-19 15:30:00	2011-02-20 13:00:00	7.79953	59.1	0	2011-02-19 16:00:00	2011-02-20 19:30:00	2011-02-21 18:00:00	0.81	94.7	42.1	4.95336e+06
237	2011-02-26 23:06:00	2011-02-27 00:30:00	2011-02-27 11:00:00	4.39977	14.3	0	2011-02-27 02:00:00	2011-02-28 01:45:00	2011-02-28 18:00:00	19.025	42.1	31.2	959752
238	2011-03-21 06:30:00	2011-03-21 14:28:29	2011-03-22 03:00:00	2.4	16.7	0	2011-03-21 16:00:00	2011-03-22 13:15:00	2011-03-23 10:00:00	1.71	8.9	6.85	221153
239	2011-11-04 18:30:00	2011-11-04 19:29:57	2011-11-05 10:00:00	6.29598	29.2	0	2011-11-04 18:45:00	2011-11-05 07:45:00	2011-11-05 13:00:00	0.25	0.38	0.34	1079.38
240	2011-11-07 04:00:00	2011-11-07 06:30:02	2011-11-07 20:00:00	4.99822	15	29.3	2011-11-07 06:00:00	2011-11-08 03:45:00	2011-11-09 05:00:00	5.5525	31.2	12.9	1.17347e+06
241	2011-12-12 08:03:19	2011-12-12 09:29:55	2011-12-14 09:00:00	4.69627	61.1	0	2011-12-12 13:00:00	2011-12-13 04:45:00	2011-12-16 02:00:00	1.71	441	50	3.46594e+07
242	2011-12-18 01:20:00	2011-12-18 16:30:03	2011-12-18 18:00:00	2.19867	9.6	61.1	2011-12-18 04:00:00	2011-12-19 02:00:00	2011-12-19 12:00:00	24.6	81	62.4	727819
243	2012-12-13 17:30:00	2012-12-14 02:30:01	2012-12-14 13:00:00	12.0975	44.1	0	2012-12-14 03:00:00	2012-12-14 05:45:00	2012-12-14 15:00:00	0.46	1.09	0.48	9151.88
244	2012-12-14 21:20:00	2012-12-15 12:29:57	2012-12-15 23:00:00	4.79854	40.9	44.1	2012-12-15 06:00:00	2012-12-15 19:45:00	2012-12-17 02:00:00	0.7375	339	24.9	1.09436e+07
245	2012-12-18 22:00:00	2012-12-18 23:30:01	2012-12-19 02:00:00	4.899	8.7	85	2012-12-19 07:00:00	2012-12-19 08:00:00	2012-12-21 04:00:00	52.95	143	17	1.63429e+06
246	2013-03-08	2013-03-08 05:29:53	2013-03-09 13:00:00	13.085	59.1	0	2013-03-08 05:00:00	2013-03-08 19:00:00	2013-03-10 15:00:00	7	1120	135	4.58959e+07
247	2013-11-21 20:07:30	2013-11-22 05:29:57	2013-11-24 16:00:00	11.0977	101.4	0	2013-11-22 06:00:00	2013-11-23 17:15:00	2013-11-27 01:00:00	0.51	112	6.85	7.33922e+06
248	2013-12-19 19:30:00	2013-12-20 05:29:56	2013-12-20 23:00:00	6.79974	36.5	0	2013-12-20 11:00:00	2013-12-21 05:30:00	2013-12-22	1.36375	94.7	60	2.58323e+06
249	2014-02-28 19:20:00	2014-03-01 21:29:58	2014-03-02 03:00:00	8.2997	75.6	0	2014-03-01 21:00:00	2014-03-02 09:30:00	2014-03-05 18:00:00	1.1075	96.4	9.55	7.15358e+06
250	2016-08-04 15:00:48	2016-08-04 15:30:48	2016-08-04 17:00:00	7.42133	9.1	47.5	2016-08-05 11:00:00	2016-08-05 11:15:00	2016-08-05 13:00:00	8.4425	12.9	3.84	4879.41
251	2016-08-05 09:03:45	2016-08-05 10:29:57	2016-08-05 15:00:00	12.9929	23.4	43.5	2016-08-05 11:00:00	2016-08-06 08:45:00	2016-08-07 22:00:00	8.4425	14.6	3.11	314330
252	2016-08-10 14:04:36	2016-08-10 14:34:36	2016-08-10 16:00:00	1.36917	2.4	32.5	2016-08-10 15:00:00	2016-08-10 15:45:00	2016-08-10 19:00:00	1.7375	1.92	1.71	1021.22
253	2016-08-11	2016-08-11 01:31:13	2016-08-11 03:00:00	4.50216	4.8	25.8	2016-08-11 00:15:00	2016-08-11 00:15:00	2016-08-11 04:00:00	1.71	1.71	1.42	11.4
254	2016-12-21 16:00:00	2016-12-22 04:30:02	2016-12-23 08:00:00	9.49496	37.8	15.6	2016-12-22 05:00:00	2016-12-22 18:45:00	2016-12-23 09:00:00	0.4475	202	49.75	3.03731e+06
255	2016-12-24 10:12:00	2016-12-24 16:29:59	2016-12-25 04:00:00	3.2	16.9	38.1	2016-12-24 16:00:00	2016-12-24 21:45:00	2016-12-26 20:00:00	23.1	242	36	9.67245e+06
256	2017-01-19 07:00:00	2017-01-20 20:30:01	2017-01-21 16:00:00	6.5991	61.9	11.2	2017-01-19 15:00:00	2017-01-21 03:35:00	2017-01-22 19:00:00	14.4	3960	134	1.55022e+08
257	2017-01-23 10:00:00	2017-01-23 11:30:13	2017-01-24	1	6.7	61.9	2017-01-23 16:00:00	2017-01-23 21:15:00	2017-01-25 19:00:00	99.7	418	82.775	1.37338e+07
258	2017-02-18 01:00:00	2017-02-19 05:29:57	2017-02-19 21:00:00	3.79819	45	0.5	2017-02-18 08:00:00	2017-02-19 12:00:00	2017-02-24 08:00:00	2.6	225	22.4	2.99602e+07
259	2017-02-27 12:30:00	2017-02-27 21:30:01	2017-02-28 15:00:00	5.29983	63.5	0	2017-02-27 16:00:00	2017-02-28 09:00:00	2017-03-05 07:00:00	10.5	4910	35.2	2.04669e+08
260	2018-08-14 17:00:36	2018-08-14 18:29:55	2018-08-14 23:00:00	22.5802	40.1	26.3	2018-08-14 19:00:00	2018-08-15 11:15:00	2018-08-17 07:00:00	5.1475	29	3.27	1.17464e+06
261	2018-08-18 15:01:56	2018-08-18 16:29:56	2018-08-18 17:00:00	5.79851	9	55.3	2018-08-18 15:16:56	2018-08-18 16:45:00	2018-08-18 18:00:00	1.16	1.24	1.16	72
262	2018-08-21 06:06:39	2018-08-21 07:29:57	2018-08-21 09:00:00	9.89333	12	12	2018-08-21 07:00:00	2018-08-21 08:30:00	2018-08-21 19:00:00	3.2675	14.6	0.67	105837
263	2018-08-22 00:20:00	2018-08-22 02:29:59	2018-08-22 07:00:00	3.19762	9.2	24	2018-08-22 00:35:00	2018-08-22 02:00:00	2018-08-22 08:00:00	0.54	0.59	0.54	405
264	2018-08-22 20:00:00	2018-08-22 21:29:55	2018-08-22 22:00:00	0.224698	0.4	30.2	2018-08-22 20:15:00	2018-08-22 20:15:00	2018-08-22 23:00:00	0.34	0.34	0.31	36.8182
265	2018-08-24 15:15:00	2018-08-24 17:29:54	2018-08-24 18:00:00	3.39865	6.3	24.3	2018-08-24 15:30:00	2018-08-24 15:30:00	2018-08-25 22:00:00	24.3	23.7	5.27	49.5
266	2018-10-04 00:15:00	2018-10-04 01:29:59	2018-10-04 03:00:00	3.39949	4.3	62.4	2018-10-04 00:30:00	2018-10-04 00:30:00	2018-10-06 01:00:00	25.6	24.9	2.53	0
267	2018-10-06 21:05:27	2018-10-07 05:29:23	2018-10-07 18:00:00	5.4	22	66.7	2018-10-07 03:00:00	2018-10-07 17:00:00	2018-10-10 21:00:00	1.4675	72	8.16	5.77841e+06
268	2018-10-14 16:20:00	2018-10-14 22:29:58	2018-10-14 23:00:00	0.499929	1.3	17.6	2018-10-14 16:35:00	2018-10-14 16:45:00	2018-10-15 08:00:00	44.2	43.3	30.05	106.23
269	2018-10-15 23:15:00	2018-10-16 03:29:56	2018-10-16 17:00:00	1.99889	6.3	18.9	2018-10-16 13:00:00	2018-10-16 15:45:00	2018-10-19 18:00:00	24.325	67.3	11.9	3.23873e+06
270	2018-12-31 10:15:00	2018-12-31 13:30:01	2018-12-31 20:00:00	1.8999	7.9	0.2	2018-12-31 10:30:00	2018-12-31 19:15:00	2019-01-01 05:00:00	0.25	0.34	0.31	2139.57
271	2019-01-05 19:00:00	2019-01-06 03:30:03	2019-01-06 16:00:00	4.29832	26.2	7.9	2019-01-06 04:00:00	2019-01-07 01:45:00	2019-01-09 21:00:00	0.59	40	7.89	3.67029e+06
272	2019-01-15 14:15:00	2019-01-15 19:29:58	2019-01-16	5.29855	15.1	5.6	2019-01-15 17:00:00	2019-01-16 08:00:00	2019-01-18 09:00:00	3.78	82.1	23.6	5.26324e+06
273	2019-02-04 08:30:00	2019-02-04 13:30:02	2019-02-04 19:00:00	0.514244	1.2	27.5	2019-02-04 08:45:00	2019-02-04 08:50:00	2019-02-07 19:00:00	910	910	84.4167	1.58281e+06
274	2019-02-05 07:00:00	2019-02-05 20:30:03	2019-02-06 03:00:00	5.99868	27.4	28.7	2019-02-05 07:15:00	2019-02-06 08:50:00	2019-02-07 19:00:00	426	2550	84.4167	2.21439e+06
275	2019-02-14 09:00:00	2019-02-14 17:29:57	2019-02-15	5.49937	35.4	0	2019-02-14 11:00:00	2019-02-14 22:45:00	2019-02-18 06:00:00	9.635	1820	39.625	7.51908e+07
276	2019-11-19 14:15:00	2019-11-20 08:30:01	2019-11-22 05:00:00	8.69847	77.6	0	2019-11-20 13:00:00	2019-11-22 07:00:00	2019-11-25 18:00:00	0.332	137	6.36	1.64717e+07
277	2019-11-28 00:03:09	2019-11-29 05:30:01	2019-11-30 03:00:00	9.09809	57.3	0	2019-11-28 01:00:00	2019-11-29 09:15:00	2019-11-30 20:00:00	2.4	723	89.3	2.27847e+07
278	2019-12-07 18:03:09	2019-12-07 22:30:01	2019-12-08 17:00:00	2.6995	15.4	2.2	2019-12-07 22:00:00	2019-12-09 01:15:00	2019-12-11 09:00:00	15.225	98.2	32.8	8.24451e+06
279	2019-12-26 16:00:00	2019-12-26 18:30:02	2019-12-28 08:00:00	3.69906	20.6	53.9	2019-12-26 17:00:00	2019-12-27 00:45:00	2019-12-29 21:00:00	107.25	355	86.75	2.42451e+07
280	2020-02-22 02:30:00	2020-02-22 10:29:59	2020-02-23 05:00:00	5.8	32	0	2020-02-22 10:00:00	2020-02-22 20:00:00	2020-02-27 05:00:00	1.865	584	23.6	3.50846e+07
281	2020-03-10 04:10:00	2020-03-10 21:30:00	2020-03-12 01:00:00	3.49943	30.1	0	2020-03-10 22:00:00	2020-03-12 15:00:00	2020-03-13 02:00:00	2.67	530	214	8.3492e+06
282	2020-03-18 14:00:00	2020-03-18 14:30:00	2020-03-19 08:00:00	6.8	30	0	2020-03-18 15:00:00	2020-03-18 23:30:00	2020-03-19 11:00:00	34.6	624	411.5	6.29607e+06
